# Supplementary material for: Quantifying the Potential for Future Gene Therapy to Lower Lifetime Risk of Polygenic Late-Onset Diseases
Source: MDPI journal article supplement (doi:10.3390/ijms20133352), 2019-07-08
Supplement: s2 [file s2]

Archive with 334 entries (253 files):
- SuppFiles/
- SuppFiles/Executable/
- SuppFiles/Executable/CommonLow.txt
- SuppFiles/Executable/Heritability.exe
- SuppFiles/Executable/HeritabilityApproxParameters/
- SuppFiles/Executable/HeritabilityApproxParameters/Alzheimers.txt
- SuppFiles/Executable/HeritabilityApproxParameters/BreastCancer.txt
- SuppFiles/Executable/HeritabilityApproxParameters/CAD.txt
- SuppFiles/Executable/HeritabilityApproxParameters/ColorectalCancer.txt
- SuppFiles/Executable/HeritabilityApproxParameters/Exponential.txt
- SuppFiles/Executable/HeritabilityApproxParameters/HipOsteoarthritis.txt
- SuppFiles/Executable/HeritabilityApproxParameters/LungCancer.txt
- SuppFiles/Executable/HeritabilityApproxParameters/PancreaticCancer.txt
- SuppFiles/Executable/HeritabilityApproxParameters/ProstateCancer.txt
- SuppFiles/Executable/HeritabilityApproxParameters/Stroke.txt
- SuppFiles/Executable/HeritabilityApproxParameters/T2D.txt
- SuppFiles/Executable/HeritabilityModelConfig.txt
- SuppFiles/Executable/HeritabilityModelConfigDEBUG.txt
- SuppFiles/Executable/ModestLow.txt
- SuppFiles/Executable/Parameters.txt
- SuppFiles/Executable/RareHigh.txt
- SuppFiles/Executable/RareLow.txt
- SuppFiles/Executable/RareMedium.txt
- SuppFiles/Executable/README.txt
- SuppFiles/Executable/SSDeathRateTable.csv
- SuppFiles/Executable/StillAliveTable.csv
- SuppFiles/LODIncidenceData/
- SuppFiles/LODIncidenceData/boehme2015prevalence.T2D.data
- SuppFiles/LODIncidenceData/brookmeyer1998projections.Alzheimers.data
- SuppFiles/LODIncidenceData/brookmeyer1998projections.AlzheimersForIncResults.data
- SuppFiles/LODIncidenceData/CancerResearchUK.BreastCancer.data
- SuppFiles/LODIncidenceData/CancerResearchUK.ColorectalCancer.data
- SuppFiles/LODIncidenceData/CancerResearchUK.LungCancerMen.data
- SuppFiles/LODIncidenceData/CancerResearchUK.PancreasCancer.data
- SuppFiles/LODIncidenceData/CancerResearchUK.PancreaticCancer.data
- SuppFiles/LODIncidenceData/CancerResearchUK.ProstateCancer.data
- SuppFiles/LODIncidenceData/Empty.data
- SuppFiles/LODIncidenceData/HipOsteoarthritis.data
- SuppFiles/LODIncidenceData/rothwell2005population.AllCerebralEvents.data
- SuppFiles/LODIncidenceData/rothwell2005population.AllCoronaryEvents.data
- SuppFiles/Notes.txt
- SuppFiles/Results/
- SuppFiles/Results/LODsCommonLow/
- SuppFiles/Results/LODsCommonLow/Alzheimers/
- SuppFiles/Results/LODsCommonLow/Alzheimers/-1.000/
- SuppFiles/Results/LODsCommonLow/Alzheimers/-1.000/FrailtyAnalysis.csv
- SuppFiles/Results/LODsCommonLow/Alzheimers/-1.000/IndividualsByBetaDistrib.csv
- SuppFiles/Results/LODsCommonLow/Alzheimers/0.250/
- SuppFiles/Results/LODsCommonLow/Alzheimers/0.250/FrailtyAnalysis.csv
- SuppFiles/Results/LODsCommonLow/Alzheimers/0.250/IndividualsByBetaDistrib.csv
- SuppFiles/Results/LODsCommonLow/Alzheimers/1.000/
- SuppFiles/Results/LODsCommonLow/Alzheimers/1.000/FrailtyAnalysis.csv
- SuppFiles/Results/LODsCommonLow/Alzheimers/1.000/IndividualsByBetaDistrib.csv
- SuppFiles/Results/LODsCommonLow/Alzheimers/1.000/ScatterData.csv
- SuppFiles/Results/LODsCommonLow/Alzheimers/DensityPostAnalysis.csv
- SuppFiles/Results/LODsCommonLow/Alzheimers/EnvironmentArray.csv
- SuppFiles/Results/LODsCommonLow/Alzheimers/EnvironmentArraySD.csv
- SuppFiles/Results/LODsCommonLow/Alzheimers/LifetimeRiskPostAnalysis.csv
- SuppFiles/Results/LODsCommonLow/BreastCancer/
- SuppFiles/Results/LODsCommonLow/BreastCancer/-1.000/
- SuppFiles/Results/LODsCommonLow/BreastCancer/-1.000/FrailtyAnalysis.csv
- SuppFiles/Results/LODsCommonLow/BreastCancer/-1.000/IndividualsByBetaDistrib.csv
- SuppFiles/Results/LODsCommonLow/BreastCancer/0.250/
- SuppFiles/Results/LODsCommonLow/BreastCancer/0.250/FrailtyAnalysis.csv
- SuppFiles/Results/LODsCommonLow/BreastCancer/0.250/IndividualsByBetaDistrib.csv
- SuppFiles/Results/LODsCommonLow/BreastCancer/1.000/
- SuppFiles/Results/LODsCommonLow/BreastCancer/1.000/FrailtyAnalysis.csv
- SuppFiles/Results/LODsCommonLow/BreastCancer/1.000/IndividualsByBetaDistrib.csv
- SuppFiles/Results/LODsCommonLow/BreastCancer/1.000/ScatterData.csv
- SuppFiles/Results/LODsCommonLow/BreastCancer/DensityPostAnalysis.csv
- SuppFiles/Results/LODsCommonLow/BreastCancer/EnvironmentArray.csv
- SuppFiles/Results/LODsCommonLow/BreastCancer/EnvironmentArraySD.csv
- SuppFiles/Results/LODsCommonLow/BreastCancer/LifetimeRiskPostAnalysis.csv
- SuppFiles/Results/LODsCommonLow/CAD/
- SuppFiles/Results/LODsCommonLow/CAD/-1.000/
- SuppFiles/Results/LODsCommonLow/CAD/-1.000/FrailtyAnalysis.csv
- SuppFiles/Results/LODsCommonLow/CAD/-1.000/IndividualsByBetaDistrib.csv
- SuppFiles/Results/LODsCommonLow/CAD/0.250/
- SuppFiles/Results/LODsCommonLow/CAD/0.250/FrailtyAnalysis.csv
- SuppFiles/Results/LODsCommonLow/CAD/0.250/IndividualsByBetaDistrib.csv
- SuppFiles/Results/LODsCommonLow/CAD/1.000/
- SuppFiles/Results/LODsCommonLow/CAD/1.000/FrailtyAnalysis.csv
- SuppFiles/Results/LODsCommonLow/CAD/1.000/IndividualsByBetaDistrib.csv
- SuppFiles/Results/LODsCommonLow/CAD/1.000/ScatterData.csv
- SuppFiles/Results/LODsCommonLow/CAD/DensityPostAnalysis.csv
- SuppFiles/Results/LODsCommonLow/CAD/EnvironmentArray.csv
- SuppFiles/Results/LODsCommonLow/CAD/EnvironmentArraySD.csv
- SuppFiles/Results/LODsCommonLow/CAD/LifetimeRiskPostAnalysis.csv
- SuppFiles/Results/LODsCommonLow/ColorectalCancer/
- SuppFiles/Results/LODsCommonLow/ColorectalCancer/-1.000/
- SuppFiles/Results/LODsCommonLow/ColorectalCancer/-1.000/FrailtyAnalysis.csv
- SuppFiles/Results/LODsCommonLow/ColorectalCancer/-1.000/IndividualsByBetaDistrib.csv
- SuppFiles/Results/LODsCommonLow/ColorectalCancer/0.250/
- SuppFiles/Results/LODsCommonLow/ColorectalCancer/0.250/FrailtyAnalysis.csv
- SuppFiles/Results/LODsCommonLow/ColorectalCancer/0.250/IndividualsByBetaDistrib.csv
- SuppFiles/Results/LODsCommonLow/ColorectalCancer/1.000/
- SuppFiles/Results/LODsCommonLow/ColorectalCancer/1.000/FrailtyAnalysis.csv
- SuppFiles/Results/LODsCommonLow/ColorectalCancer/1.000/IndividualsByBetaDistrib.csv
- SuppFiles/Results/LODsCommonLow/ColorectalCancer/1.000/ScatterData.csv
- SuppFiles/Results/LODsCommonLow/ColorectalCancer/DensityPostAnalysis.csv
- SuppFiles/Results/LODsCommonLow/ColorectalCancer/EnvironmentArray.csv
- SuppFiles/Results/LODsCommonLow/ColorectalCancer/EnvironmentArraySD.csv
- SuppFiles/Results/LODsCommonLow/ColorectalCancer/LifetimeRiskPostAnalysis.csv
- SuppFiles/Results/LODsCommonLow/HeritabilityModelConfig.txt
- SuppFiles/Results/LODsCommonLow/LungCancer/
- SuppFiles/Results/LODsCommonLow/LungCancer/-1.000/
- SuppFiles/Results/LODsCommonLow/LungCancer/-1.000/FrailtyAnalysis.csv
- SuppFiles/Results/LODsCommonLow/LungCancer/-1.000/IndividualsByBetaDistrib.csv
- SuppFiles/Results/LODsCommonLow/LungCancer/0.250/
- SuppFiles/Results/LODsCommonLow/LungCancer/0.250/FrailtyAnalysis.csv
- SuppFiles/Results/LODsCommonLow/LungCancer/0.250/IndividualsByBetaDistrib.csv
- SuppFiles/Results/LODsCommonLow/LungCancer/1.000/
- SuppFiles/Results/LODsCommonLow/LungCancer/1.000/FrailtyAnalysis.csv
- SuppFiles/Results/LODsCommonLow/LungCancer/1.000/IndividualsByBetaDistrib.csv
- SuppFiles/Results/LODsCommonLow/LungCancer/1.000/ScatterData.csv
- SuppFiles/Results/LODsCommonLow/LungCancer/DensityPostAnalysis.csv
- SuppFiles/Results/LODsCommonLow/LungCancer/EnvironmentArray.csv
- SuppFiles/Results/LODsCommonLow/LungCancer/EnvironmentArraySD.csv
- SuppFiles/Results/LODsCommonLow/LungCancer/LifetimeRiskPostAnalysis.csv
- SuppFiles/Results/LODsCommonLow/Parameters.txt
- SuppFiles/Results/LODsCommonLow/ProstateCancer/
- SuppFiles/Results/LODsCommonLow/ProstateCancer/-1.000/
- SuppFiles/Results/LODsCommonLow/ProstateCancer/-1.000/FrailtyAnalysis.csv
- SuppFiles/Results/LODsCommonLow/ProstateCancer/-1.000/IndividualsByBetaDistrib.csv
- SuppFiles/Results/LODsCommonLow/ProstateCancer/0.250/
- SuppFiles/Results/LODsCommonLow/ProstateCancer/0.250/FrailtyAnalysis.csv
- SuppFiles/Results/LODsCommonLow/ProstateCancer/0.250/IndividualsByBetaDistrib.csv
- SuppFiles/Results/LODsCommonLow/ProstateCancer/1.000/
- SuppFiles/Results/LODsCommonLow/ProstateCancer/1.000/FrailtyAnalysis.csv
- SuppFiles/Results/LODsCommonLow/ProstateCancer/1.000/IndividualsByBetaDistrib.csv
- SuppFiles/Results/LODsCommonLow/ProstateCancer/1.000/ScatterData.csv
- SuppFiles/Results/LODsCommonLow/ProstateCancer/DensityPostAnalysis.csv
- SuppFiles/Results/LODsCommonLow/ProstateCancer/EnvironmentArray.csv
- SuppFiles/Results/LODsCommonLow/ProstateCancer/EnvironmentArraySD.csv
- SuppFiles/Results/LODsCommonLow/ProstateCancer/LifetimeRiskPostAnalysis.csv
- SuppFiles/Results/LODsCommonLow/Stroke/
- SuppFiles/Results/LODsCommonLow/Stroke/-1.000/
- SuppFiles/Results/LODsCommonLow/Stroke/-1.000/FrailtyAnalysis.csv
- SuppFiles/Results/LODsCommonLow/Stroke/-1.000/IndividualsByBetaDistrib.csv
- SuppFiles/Results/LODsCommonLow/Stroke/0.250/
- SuppFiles/Results/LODsCommonLow/Stroke/0.250/FrailtyAnalysis.csv
- SuppFiles/Results/LODsCommonLow/Stroke/0.250/IndividualsByBetaDistrib.csv
- SuppFiles/Results/LODsCommonLow/Stroke/1.000/
- SuppFiles/Results/LODsCommonLow/Stroke/1.000/FrailtyAnalysis.csv
- SuppFiles/Results/LODsCommonLow/Stroke/1.000/IndividualsByBetaDistrib.csv
- SuppFiles/Results/LODsCommonLow/Stroke/1.000/ScatterData.csv
- SuppFiles/Results/LODsCommonLow/Stroke/DensityPostAnalysis.csv
- SuppFiles/Results/LODsCommonLow/Stroke/EnvironmentArray.csv
- SuppFiles/Results/LODsCommonLow/Stroke/EnvironmentArraySD.csv
- SuppFiles/Results/LODsCommonLow/Stroke/LifetimeRiskPostAnalysis.csv
- SuppFiles/Results/LODsCommonLow/T2D/
- SuppFiles/Results/LODsCommonLow/T2D/-1.000/
- SuppFiles/Results/LODsCommonLow/T2D/-1.000/FrailtyAnalysis.csv
- SuppFiles/Results/LODsCommonLow/T2D/-1.000/IndividualsByBetaDistrib.csv
- SuppFiles/Results/LODsCommonLow/T2D/0.250/
- SuppFiles/Results/LODsCommonLow/T2D/0.250/FrailtyAnalysis.csv
- SuppFiles/Results/LODsCommonLow/T2D/0.250/IndividualsByBetaDistrib.csv
- SuppFiles/Results/LODsCommonLow/T2D/1.000/
- SuppFiles/Results/LODsCommonLow/T2D/1.000/FrailtyAnalysis.csv
- SuppFiles/Results/LODsCommonLow/T2D/1.000/IndividualsByBetaDistrib.csv
- SuppFiles/Results/LODsCommonLow/T2D/1.000/ScatterData.csv
- SuppFiles/Results/LODsCommonLow/T2D/DensityPostAnalysis.csv
- SuppFiles/Results/LODsCommonLow/T2D/EnvironmentArray.csv
- SuppFiles/Results/LODsCommonLow/T2D/EnvironmentArraySD.csv
- SuppFiles/Results/LODsCommonLow/T2D/LifetimeRiskPostAnalysis.csv
- SuppFiles/Results/LODsCommonLow/_ConfDiscover/
- SuppFiles/Results/LODsCommonLow/_ConfDiscover/HeritabilityModelConfig.txt
- SuppFiles/Results/LODsCommonLow/_ConfEdit/
- SuppFiles/Results/LODsCommonLow/_ConfEdit/HeritabilityModelConfig.txt
- SuppFiles/Results/LODsCommonLow/_ConfEdit0.25/
- SuppFiles/Results/LODsCommonLow/_ConfEdit0.25/HeritabilityModelConfig.txt
- SuppFiles/Results/LODsCommonLow/_LifetimeRiskResults/
- SuppFiles/Results/LODsCommonLow/_LifetimeRiskResults/OnsetDelayAt30percentLevel.txt
- SuppFiles/Results/LODsCommonLow/_LifetimeRiskResults/OnsetDelayAt99percentOfMaxOrLifetimeRisk.txt
- SuppFiles/Results/LODsCommonLow/_LifetimeRiskResults/YearsOfOnsetDelayWithHazardRatioChange.txt
- SuppFiles/Results/LODsRareMedium/
- SuppFiles/Results/LODsRareMedium/Alzheimers/
- SuppFiles/Results/LODsRareMedium/Alzheimers/-1.000/
- SuppFiles/Results/LODsRareMedium/Alzheimers/-1.000/FrailtyAnalysis.csv
- SuppFiles/Results/LODsRareMedium/Alzheimers/-1.000/IndividualsByBetaDistrib.csv
- SuppFiles/Results/LODsRareMedium/Alzheimers/0.250/
- SuppFiles/Results/LODsRareMedium/Alzheimers/0.250/FrailtyAnalysis.csv
- SuppFiles/Results/LODsRareMedium/Alzheimers/0.250/IndividualsByBetaDistrib.csv
- SuppFiles/Results/LODsRareMedium/Alzheimers/1.000/
- SuppFiles/Results/LODsRareMedium/Alzheimers/1.000/FrailtyAnalysis.csv
- SuppFiles/Results/LODsRareMedium/Alzheimers/1.000/IndividualsByBetaDistrib.csv
- SuppFiles/Results/LODsRareMedium/Alzheimers/EnvironmentArray.csv
- SuppFiles/Results/LODsRareMedium/Alzheimers/EnvironmentArraySD.csv
- SuppFiles/Results/LODsRareMedium/Alzheimers/FrailtyAnalysis.csv
- SuppFiles/Results/LODsRareMedium/BreastCancer/
- SuppFiles/Results/LODsRareMedium/BreastCancer/-1.000/
- SuppFiles/Results/LODsRareMedium/BreastCancer/-1.000/FrailtyAnalysis.csv
- SuppFiles/Results/LODsRareMedium/BreastCancer/-1.000/IndividualsByBetaDistrib.csv
- SuppFiles/Results/LODsRareMedium/BreastCancer/0.250/
- SuppFiles/Results/LODsRareMedium/BreastCancer/0.250/FrailtyAnalysis.csv
- SuppFiles/Results/LODsRareMedium/BreastCancer/0.250/IndividualsByBetaDistrib.csv
- SuppFiles/Results/LODsRareMedium/BreastCancer/1.000/
- SuppFiles/Results/LODsRareMedium/BreastCancer/1.000/FrailtyAnalysis.csv
- SuppFiles/Results/LODsRareMedium/BreastCancer/1.000/IndividualsByBetaDistrib.csv
- SuppFiles/Results/LODsRareMedium/BreastCancer/EnvironmentArray.csv
- SuppFiles/Results/LODsRareMedium/BreastCancer/EnvironmentArraySD.csv
- SuppFiles/Results/LODsRareMedium/BreastCancer/FrailtyAnalysis.csv
- SuppFiles/Results/LODsRareMedium/CAD/
- SuppFiles/Results/LODsRareMedium/CAD/-1.000/
- SuppFiles/Results/LODsRareMedium/CAD/-1.000/FrailtyAnalysis.csv
- SuppFiles/Results/LODsRareMedium/CAD/-1.000/IndividualsByBetaDistrib.csv
- SuppFiles/Results/LODsRareMedium/CAD/0.250/
- SuppFiles/Results/LODsRareMedium/CAD/0.250/FrailtyAnalysis.csv
- SuppFiles/Results/LODsRareMedium/CAD/0.250/IndividualsByBetaDistrib.csv
- SuppFiles/Results/LODsRareMedium/CAD/1.000/
- SuppFiles/Results/LODsRareMedium/CAD/1.000/FrailtyAnalysis.csv
- SuppFiles/Results/LODsRareMedium/CAD/1.000/IndividualsByBetaDistrib.csv
- SuppFiles/Results/LODsRareMedium/CAD/EnvironmentArray.csv
- SuppFiles/Results/LODsRareMedium/CAD/EnvironmentArraySD.csv
- SuppFiles/Results/LODsRareMedium/CAD/FrailtyAnalysis.csv
- SuppFiles/Results/LODsRareMedium/ColorectalCancer/
- SuppFiles/Results/LODsRareMedium/ColorectalCancer/-1.000/
- SuppFiles/Results/LODsRareMedium/ColorectalCancer/-1.000/FrailtyAnalysis.csv
- SuppFiles/Results/LODsRareMedium/ColorectalCancer/-1.000/IndividualsByBetaDistrib.csv
- SuppFiles/Results/LODsRareMedium/ColorectalCancer/0.250/
- SuppFiles/Results/LODsRareMedium/ColorectalCancer/0.250/FrailtyAnalysis.csv
- SuppFiles/Results/LODsRareMedium/ColorectalCancer/0.250/IndividualsByBetaDistrib.csv
- SuppFiles/Results/LODsRareMedium/ColorectalCancer/1.000/
- SuppFiles/Results/LODsRareMedium/ColorectalCancer/1.000/FrailtyAnalysis.csv
- SuppFiles/Results/LODsRareMedium/ColorectalCancer/1.000/IndividualsByBetaDistrib.csv
- SuppFiles/Results/LODsRareMedium/ColorectalCancer/EnvironmentArray.csv
- SuppFiles/Results/LODsRareMedium/ColorectalCancer/EnvironmentArraySD.csv
- SuppFiles/Results/LODsRareMedium/ColorectalCancer/FrailtyAnalysis.csv
- SuppFiles/Results/LODsRareMedium/HeritabilityModelConfig.txt
- SuppFiles/Results/LODsRareMedium/LungCancer/
- SuppFiles/Results/LODsRareMedium/LungCancer/-1.000/
- SuppFiles/Results/LODsRareMedium/LungCancer/-1.000/FrailtyAnalysis.csv
- SuppFiles/Results/LODsRareMedium/LungCancer/-1.000/IndividualsByBetaDistrib.csv
- SuppFiles/Results/LODsRareMedium/LungCancer/0.250/
- SuppFiles/Results/LODsRareMedium/LungCancer/0.250/FrailtyAnalysis.csv
- SuppFiles/Results/LODsRareMedium/LungCancer/0.250/IndividualsByBetaDistrib.csv
- SuppFiles/Results/LODsRareMedium/LungCancer/1.000/
- SuppFiles/Results/LODsRareMedium/LungCancer/1.000/FrailtyAnalysis.csv
- SuppFiles/Results/LODsRareMedium/LungCancer/1.000/IndividualsByBetaDistrib.csv
- SuppFiles/Results/LODsRareMedium/LungCancer/EnvironmentArray.csv
- SuppFiles/Results/LODsRareMedium/LungCancer/EnvironmentArraySD.csv
- SuppFiles/Results/LODsRareMedium/LungCancer/FrailtyAnalysis.csv
- SuppFiles/Results/LODsRareMedium/Parameters.txt
- SuppFiles/Results/LODsRareMedium/ProstateCancer/
- SuppFiles/Results/LODsRareMedium/ProstateCancer/-1.000/
- SuppFiles/Results/LODsRareMedium/ProstateCancer/-1.000/FrailtyAnalysis.csv
- SuppFiles/Results/LODsRareMedium/ProstateCancer/-1.000/IndividualsByBetaDistrib.csv
- SuppFiles/Results/LODsRareMedium/ProstateCancer/0.250/
- SuppFiles/Results/LODsRareMedium/ProstateCancer/0.250/FrailtyAnalysis.csv
- SuppFiles/Results/LODsRareMedium/ProstateCancer/0.250/IndividualsByBetaDistrib.csv
- SuppFiles/Results/LODsRareMedium/ProstateCancer/1.000/
- SuppFiles/Results/LODsRareMedium/ProstateCancer/1.000/FrailtyAnalysis.csv
- SuppFiles/Results/LODsRareMedium/ProstateCancer/1.000/IndividualsByBetaDistrib.csv
- SuppFiles/Results/LODsRareMedium/ProstateCancer/EnvironmentArray.csv
- SuppFiles/Results/LODsRareMedium/ProstateCancer/EnvironmentArraySD.csv
- SuppFiles/Results/LODsRareMedium/ProstateCancer/FrailtyAnalysis.csv
- SuppFiles/Results/LODsRareMedium/Stroke/
- SuppFiles/Results/LODsRareMedium/Stroke/-1.000/
- SuppFiles/Results/LODsRareMedium/Stroke/-1.000/FrailtyAnalysis.csv
- SuppFiles/Results/LODsRareMedium/Stroke/-1.000/IndividualsByBetaDistrib.csv
- SuppFiles/Results/LODsRareMedium/Stroke/0.250/
- SuppFiles/Results/LODsRareMedium/Stroke/0.250/FrailtyAnalysis.csv
- SuppFiles/Results/LODsRareMedium/Stroke/0.250/IndividualsByBetaDistrib.csv
- SuppFiles/Results/LODsRareMedium/Stroke/1.000/
- SuppFiles/Results/LODsRareMedium/Stroke/1.000/FrailtyAnalysis.csv
- SuppFiles/Results/LODsRareMedium/Stroke/1.000/IndividualsByBetaDistrib.csv
- SuppFiles/Results/LODsRareMedium/Stroke/EnvironmentArray.csv
- SuppFiles/Results/LODsRareMedium/Stroke/EnvironmentArraySD.csv
- SuppFiles/Results/LODsRareMedium/Stroke/FrailtyAnalysis.csv
- SuppFiles/Results/LODsRareMedium/T2D/
- SuppFiles/Results/LODsRareMedium/T2D/-1.000/
- SuppFiles/Results/LODsRareMedium/T2D/-1.000/FrailtyAnalysis.csv
- SuppFiles/Results/LODsRareMedium/T2D/-1.000/IndividualsByBetaDistrib.csv
- SuppFiles/Results/LODsRareMedium/T2D/0.250/
- SuppFiles/Results/LODsRareMedium/T2D/0.250/FrailtyAnalysis.csv
- SuppFiles/Results/LODsRareMedium/T2D/0.250/IndividualsByBetaDistrib.csv
- SuppFiles/Results/LODsRareMedium/T2D/1.000/
- SuppFiles/Results/LODsRareMedium/T2D/1.000/FrailtyAnalysis.csv
- SuppFiles/Results/LODsRareMedium/T2D/1.000/IndividualsByBetaDistrib.csv
- SuppFiles/Results/LODsRareMedium/T2D/EnvironmentArray.csv
- SuppFiles/Results/LODsRareMedium/T2D/EnvironmentArraySD.csv
- SuppFiles/Results/LODsRareMedium/T2D/FrailtyAnalysis.csv
- SuppFiles/Results/LODsRareMedium/_ConfDiscover/
- SuppFiles/Results/LODsRareMedium/_ConfDiscover/HeritabilityModelConfig.txt
- SuppFiles/Results/LODsRareMedium/_ConfEdit/
- SuppFiles/Results/LODsRareMedium/_ConfEdit/HeritabilityModelConfig.txt
- SuppFiles/Results/LODsRareMedium/_ConfEdit0.25/
- SuppFiles/Results/LODsRareMedium/_ConfEdit0.25/HeritabilityModelConfig.txt
- SuppFiles/Results/StatisticalPowerAlleleParameters.txt
- SuppFiles/SourceFiles/
- SuppFiles/SourceFiles/BinarySearch.cpp
- SuppFiles/SourceFiles/ClassDiagram.cd
- SuppFiles/SourceFiles/Heritability.sln
- SuppFiles/SourceFiles/Heritability.vcxproj
- SuppFiles/SourceFiles/Heritability.vcxproj.filters
- SuppFiles/SourceFiles/Heritability.vcxproj.user
- SuppFiles/SourceFiles/Heritability.vssscc
- SuppFiles/SourceFiles/HeritabilitySimulation.cpp
- SuppFiles/SourceFiles/HeritabilitySimulation.h
- SuppFiles/SourceFiles/icon1.ico
[truncated: 34 more entries]
