# Supplementary material for: Quantifying the Potential for Future Gene Therapy to Lower Lifetime Risk of Polygenic Late-Onset Diseases
Source: MDPI journal article supplement (doi:10.3390/ijms20133352), 2019-07-08
Supplement: s2 [file s2 › SuppFiles/Executable/HeritabilityApproxParameters/Alzheimers.txt]

-1.5858e+01,2.0479e-01,-2.4468e-03,6.0339e+01,6.2441e+00,1.0367e+02,1.1856e-03
