# Supplementary material for: Quantifying the Potential for Future Gene Therapy to Lower Lifetime Risk of Polygenic Late-Onset Diseases
Source: MDPI journal article supplement (doi:10.3390/ijms20133352), 2019-07-08
Supplement: s2 [file s2 › SuppFiles/Executable/HeritabilityApproxParameters/BreastCancer.txt]

-6.9786e+00,1.0467e-01,-4.742e-02,4.0832e-01,6.4345e+00,4.8004e+01,1.1131e-02
