# Supplementary material for: Quantifying the Potential for Future Gene Therapy to Lower Lifetime Risk of Polygenic Late-Onset Diseases
Source: MDPI journal article supplement (doi:10.3390/ijms20133352), 2019-07-08
Supplement: s2 [file s2 › SuppFiles/Executable/HeritabilityApproxParameters/CAD.txt]

-6.1384e+00,9.0682e-02,-1.1887e-01,4.3306e+00,1.005e+01,8.1467e+01,3.8168e-02
