# Supplementary material for: Quantifying the Potential for Future Gene Therapy to Lower Lifetime Risk of Polygenic Late-Onset Diseases
Source: MDPI journal article supplement (doi:10.3390/ijms20133352), 2019-07-08
Supplement: s2 [file s2 › SuppFiles/Executable/HeritabilityApproxParameters/ColorectalCancer.txt]

-1.1235e+01,1.3396e-01,-2.9657e-03,6.0969e-01,8.1352e+00,7.1809e+01,1.334e-03
