# Supplementary material for: Quantifying the Potential for Future Gene Therapy to Lower Lifetime Risk of Polygenic Late-Onset Diseases
Source: MDPI journal article supplement (doi:10.3390/ijms20133352), 2019-07-08
Supplement: s2 [file s2 › SuppFiles/Executable/HeritabilityApproxParameters/HipOsteoarthritis.txt]

-1.213e+01,1.5197e-01,-5.3609e-03,9.1638e-01,6.1517e+00,7.1542e+01,1.2569e-03
