# Supplementary material for: Quantifying the Potential for Future Gene Therapy to Lower Lifetime Risk of Polygenic Late-Onset Diseases
Source: MDPI journal article supplement (doi:10.3390/ijms20133352), 2019-07-08
Supplement: s2 [file s2 › SuppFiles/Executable/HeritabilityApproxParameters/LungCancer.txt]

-1.369e+01,1.7193e-01,-1.462e-03,6.2286e-01,6.2633e+00,6.9626e+01,5.0085e-04
