# Supplementary material for: Quantifying the Potential for Future Gene Therapy to Lower Lifetime Risk of Polygenic Late-Onset Diseases
Source: MDPI journal article supplement (doi:10.3390/ijms20133352), 2019-07-08
Supplement: s2 [file s2 › SuppFiles/Executable/HeritabilityApproxParameters/PancreaticCancer.txt]

-1.2695e+01,1.2243e-01,-2.126e-03,1.2672e-01,7.6751e+00,7.1615e+01,7.2235e-04
