# Supplementary material for: Quantifying the Potential for Future Gene Therapy to Lower Lifetime Risk of Polygenic Late-Onset Diseases
Source: MDPI journal article supplement (doi:10.3390/ijms20133352), 2019-07-08
Supplement: s2 [file s2 › SuppFiles/Executable/HeritabilityApproxParameters/ProstateCancer.txt]

-1.2656e+01,1.7922e-01,-2.6717e-02,7.8131e-01,4.1596e+00,6.2476e+01,5.6468e-03
