# Supplementary material for: Quantifying the Potential for Future Gene Therapy to Lower Lifetime Risk of Polygenic Late-Onset Diseases
Source: MDPI journal article supplement (doi:10.3390/ijms20133352), 2019-07-08
Supplement: s2 [file s2 › SuppFiles/Executable/HeritabilityApproxParameters/Stroke.txt]

-7.2988e+00,1.0732e-01,-9.3205e-02,4.3047e+00,8.2497e+00,7.8842e+01,2.6827e-02
