# Supplementary material for: Quantifying the Potential for Future Gene Therapy to Lower Lifetime Risk of Polygenic Late-Onset Diseases
Source: MDPI journal article supplement (doi:10.3390/ijms20133352), 2019-07-08
Supplement: s2 [file s2 › SuppFiles/Executable/HeritabilityApproxParameters/T2D.txt]

-6.127e+00,1.1689e-01,-5.6343e-02,2.5844e+00,7.0165e+00,5.4676e+01,1.1978e-02
