# Supplementary material for: Quantifying the Potential for Future Gene Therapy to Lower Lifetime Risk of Polygenic Late-Onset Diseases
Source: MDPI journal article supplement (doi:10.3390/ijms20133352), 2019-07-08
Supplement: s2 [file s2 › SuppFiles/Executable/Parameters.txt]

[Parameters]
WindowPos=0,1,-1,-1,-1,-1,36,215,1303,2004,0

AskPermissions=0  // ask permision to stop simulation or close program,  1(deafault, ask), 0(just do it)
