# Supplementary material for: Quantifying the Potential for Future Gene Therapy to Lower Lifetime Risk of Polygenic Late-Onset Diseases
Source: MDPI journal article supplement (doi:10.3390/ijms20133352), 2019-07-08
Supplement: s2 [file s2 › SuppFiles/Executable/RareHigh.txt]

SNP	Allele1	Allele2Chrom		Pos	EAF	OR	Pvalue
rs10000	C	T	0	0	0.0073	4.05	7.1E-10
rs20000	C	T	0	0	0.0180	4.05	7.1E-10
rs30000	C	T	0	0	0.0286	4.05	7.1E-10
rs40000	C	T	0	0	0.0393	4.05	7.1E-10
rs50000	C	T	0	0	0.0500	4.05	7.1E-10
rs60000	C	T	0	0	0.0073	3.445	7.1E-10
rs70000	C	T	0	0	0.0180	3.445	7.1E-10
rs80000	C	T	0	0	0.0286	3.445	7.1E-1
rs90000	C	T	0	0	0.0393	3.445	7.1E-10
rs100000	C	T	0	0	0.0500	3.445	7.1E-10
rs110000	C	T	0	0	0.0073	2.84	7.1E-10
rs120000	C	T	0	0	0.0180	2.84	7.1E-10
rs130000	C	T	0	0	0.0286	2.84	7.1E-10
rs140000	C	T	0	0	0.0393	2.84	7.1E-10
rs150000	C	T	0	0	0.0500	2.84	7.1E-10
rs160000	C	T	0	0	0.0073	2.235	7.1E-10
rs170000	C	T	0	0	0.0180	2.235	7.1E-10
rs180000	C	T	0	0	0.0286	2.235	7.1E-10
rs190000	C	T	0	0	0.0393	2.235	7.1E-10
rs200000	C	T	0	0	0.0500	2.235	7.1E-10
rs210000	C	T	0	0	0.0073	1.63	7.1E-10
rs220000	C	T	0	0	0.0180	1.63	7.1E-10
rs230000	C	T	0	0	0.0286	1.63	7.1E-10
rs240000	C	T	0	0	0.0393	1.63	7.1E-10
rs250000	C	T	0	0	0.0500	1.63	7.1E-10
