# Supplementary material for: Quantifying the Potential for Future Gene Therapy to Lower Lifetime Risk of Polygenic Late-Onset Diseases
Source: MDPI journal article supplement (doi:10.3390/ijms20133352), 2019-07-08
Supplement: s2 [file s2 › SuppFiles/Executable/README.txt]

The simulation program Heritability.exe is the basis for analysis for two publications:
1. “Age-related late-onset disease heritability patterns and implications for genome-wide association studies” - an earlier publications, and -
2. “Could future gene therapy prevent ageing diseases?”

The version that is in Supplementary materials of the 2. also supports all 1. simulations.

The program name is is just a short code name, please dont read much from it. It does much more than the name may imply. The program is not developed as a tool user tool, but mostly focused on a generic analysis of the concepts for these two publications. It doesn’t appear there would be a need to make it into a user friendly general use utility, therefore not much additional usability is implemented. If there were develops a specific and broad need, we may address additional features and user interfaces.

The program is a Windows 64 bit self-contained application. It is designed to run with populations up to 2,000,000,000, when it may use up to 150GB of RAM. Any smaller population, preferably in multiples of 100 may be used, and the amount of memory and corresponding speed will diminish proportionately.
CAUTION: the program is hardcoaded to use 64 threads, based on our platform. It may produce 100% CPU load on systems with fewer cores+hyperthreads. If it becomes a problem, the program should be recompiled using Visual Studio 2015 or later, changing the definition GE_OMP_THREADS in Heritability.h to the sustainable number of threads.

If one would like to analyze LODs, the easiest way to start is:
1. To use the program,  copy the complete content of this folder in a folder of your choice. 

2. The configurations are contained in HeritabilityModelConfig.txt files. The easiest way to start is to copy one of the HeritabilityModelConfig.txt files from data folders in Supplementary information into the program folder, and modify it. The variable names are made self-descriptive. In case of yes-no choices, values of 0 and 1 should be used. It is important to change szResultFilePath to point to the location you want your data to reside. 

3. There is an overlap between the two publications functionality. Therefore, keep the setting in the topmost section without many flag changes, for example, bDoCohortStudy applies to simulation 1, and will also process for simulation 2., but the results are not needed for any conclusions, so keeping it as 0=OFF is recommended.
The setting for number of LODs is nNumberOfLODs= the value is the number of LODs. 
Then, each LOD is described in Enumerated separate section, [0], [1], [2], [3] - for nNumberOfLODs=4. Note that the count starts at 0, and no skipped or sections are alowed. Sections may be positioned sequentially in any order.

4. The simulation needs to be restarted after the settings modifications.

5. If there will be interest, a more detailed README can be produced. At the moment, the flags and settings functionality can be found also via the source code included.
