# Supplementary material for: Quantifying the Potential for Future Gene Therapy to Lower Lifetime Risk of Polygenic Late-Onset Diseases
Source: MDPI journal article supplement (doi:10.3390/ijms20133352), 2019-07-08
Supplement: s2 [file s2 › SuppFiles/LODIncidenceData/boehme2015prevalence.T2D.data]

22	0.03
27	0.07
32	0.14
37	0.2
42	0.41
47	0.58
52	0.94
57	1.37
62	1.96
67	2.3
72	2.42
77	2.51
82	2.51
