# Supplementary material for: Quantifying the Potential for Future Gene Therapy to Lower Lifetime Risk of Polygenic Late-Onset Diseases
Source: MDPI journal article supplement (doi:10.3390/ijms20133352), 2019-07-08
Supplement: s2 [file s2 › SuppFiles/LODIncidenceData/brookmeyer1998projections.Alzheimers.data]

60 0.08
65 0.17
70 0.35
75 0.71
80 1.44
85 2.92
90 5.95
%95 12.10
