# Supplementary material for: Quantifying the Potential for Future Gene Therapy to Lower Lifetime Risk of Polygenic Late-Onset Diseases
Source: MDPI journal article supplement (doi:10.3390/ijms20133352), 2019-07-08
Supplement: s2 [file s2 › SuppFiles/LODIncidenceData/brookmeyer1998projections.AlzheimersForIncResults.data]

60	0.08
65	0.17
70	0.35
75	0.71
80	1.44
85	2.92
90	5.95
95	12.10
