# Supplementary material for: Quantifying the Potential for Future Gene Therapy to Lower Lifetime Risk of Polygenic Late-Onset Diseases
Source: MDPI journal article supplement (doi:10.3390/ijms20133352), 2019-07-08
Supplement: s2 [file s2 › SuppFiles/LODIncidenceData/CancerResearchUK.BreastCancer.data]

27	10.4e-3
32	28.9e-3
37	62.9e-3
42	122.4e-3
47	221.7e-3
52	280.5e-3
57	275.1e-3
62	351.2e-3
67	414.1e-3
72	358.7e-3
77	407.7e-3
82	441.1e-3
87	470e-3
