# Supplementary material for: Quantifying the Potential for Future Gene Therapy to Lower Lifetime Risk of Polygenic Late-Onset Diseases
Source: MDPI journal article supplement (doi:10.3390/ijms20133352), 2019-07-08
Supplement: s2 [file s2 › SuppFiles/LODIncidenceData/CancerResearchUK.ColorectalCancer.data]

27	3.3e-3
32	6.5e-3
37	8.4e-3
42	12.8e-3
47	24.1e-3
52	48.5e-3
57	86.9e-3
62	157.2e-3
67	207.5e-3
72	311.9e-3
77	384.4e-3
82	486.5e-3
87	528.5e-3
