# Supplementary material for: Quantifying the Potential for Future Gene Therapy to Lower Lifetime Risk of Polygenic Late-Onset Diseases
Source: MDPI journal article supplement (doi:10.3390/ijms20133352), 2019-07-08
Supplement: s2 [file s2 › SuppFiles/LODIncidenceData/CancerResearchUK.LungCancerMen.data]

22	0.3e-3
27	0.5e-3
32	0.9e-3
37	2.3e-3
42	6.7e-3
47	15.9e-3
52	36e-3
57	80e-3
62	151.5e-3
67	239.5e-3
72	367.9e-3
77	463.2e-3
82	538.1e-3
87	608.7e-3
