# Supplementary material for: Quantifying the Potential for Future Gene Therapy to Lower Lifetime Risk of Polygenic Late-Onset Diseases
Source: MDPI journal article supplement (doi:10.3390/ijms20133352), 2019-07-08
Supplement: s2 [file s2 › SuppFiles/LODIncidenceData/CancerResearchUK.PancreasCancer.data]

32 0.3e-3
37 1.1e-3
42 2.6e-3
47 5.3e-3
52 10e-3
57 17.4e-3
62 30.8e-3
67 44.8e-3
72 62e-3
77 81.4e-3
82 100e-3
87 116.3e-3
