# Supplementary material for: Quantifying the Potential for Future Gene Therapy to Lower Lifetime Risk of Polygenic Late-Onset Diseases
Source: MDPI journal article supplement (doi:10.3390/ijms20133352), 2019-07-08
Supplement: s2 [file s2 › SuppFiles/LODIncidenceData/CancerResearchUK.PancreaticCancer.data]

32	0.3e-3
37	1.1e-3
42	2.6e-3
47	5.3e-3
52	10e-3
57	17.4e-3
62	30.8e-3
67	44.8e-3
72	62e-3
77	81.4e-3
82	100e-3
87	116.3e-3
