# Supplementary material for: Quantifying the Potential for Future Gene Therapy to Lower Lifetime Risk of Polygenic Late-Onset Diseases
Source: MDPI journal article supplement (doi:10.3390/ijms20133352), 2019-07-08
Supplement: s2 [file s2 › SuppFiles/LODIncidenceData/CancerResearchUK.ProstateCancer.data]

42	3.3e-3
47	17.9e-3
52	64.1e-3
57	181.4e-3
62	346e-3
67	585.7e-3
72	717.1e-3
77	824.4e-3
82	728.4e-3
87	786.6e-3
