# Supplementary material for: Quantifying the Potential for Future Gene Therapy to Lower Lifetime Risk of Polygenic Late-Onset Diseases
Source: MDPI journal article supplement (doi:10.3390/ijms20133352), 2019-07-08
Supplement: s2 [file s2 › SuppFiles/Notes.txt]

The folder names reflect their content and are pretty self explanatory.

1. a) To run the simulation executable, copy the contents of the Executable folder on a Windows OS PC and paste it in a desired folder. It contains everything needed to run the simulations. 

There are two configuration sets: Discovery and Gene Therapy. 

The aging coefficient discovery simulation configuration HeritabilityModelConfig.txt files are located in _ConfDiscover folder in Trsults folder for both genetic architectures. Copy the simulation file configuration you want to start with into the executable folder.
After the aging coefficient discovery is done, the resulting coefficient with one year granularity is saved in EnvironmentArray.csv and EnvironmentArraySD.csv (SD for reporting standard deviation on reproducibility of the discovery results)

The subsequent gene therapy simulations are done by adjusting dbLodGeneEditingOR=(float) in each LOD subsection of the HeritabilityModelConfig.txt that should be placed or modified in the executable folder as above. The value dbLodGeneEditingOR=1.0 means the reproduction simulation with no gene editing, and the value dbLodGeneEditingOR=-1.0 is a reserved value that directs to edit all individuals with risk to that of population mean (1.0) at the initialization of the simulation runs. There configurations for values 1.0, -1.0 and 0.25 (decreasing OR of the polygenic risk by fourfold, same as multiplying the individuals PRS ORs by 0.25). These reported configurations are located in _ConfEdit and _ConfEdit0.25 folders.

The corresponding results are stored in CSV files in the folders with the names based on the dbLodGeneEditingOR values.

b) It may be necessary to modify szResultFilePath otherwise it will write the results into "C:\Results\Heritability\YearlyORtoRR\LODsCommonLow".

Another important parameter is nPopulation. 
The discovery in the case of the above configurations is done with simulated nPopulation of 25 million and can be done on any reasonably powerful multicore windows system with 16GB of RAM.
The analysis, in order to achieve high reproducibility, is configured for nPopulation of 1 billion individuals in HeritabilityModelConfig.txt located in _ConfEdit folders (and can be increased to maximum 2 bil). But, 1 bil simulated population would require a system with 96GB of RAM, and the number of individuals should be decreased proportionately. In addition, the amount of time the analysis will take is also proportionate to number of individuals and inversely proportionate to number of system CPU cores.
It is important to set the system environment variable OMP_NUM_THREADS=(number of available CPU cores - integer). Note that the simulation benefits from hyperthreads as well, and it is recommended for the systems with hyperthreading enabled to set the OMP_NUM_THREADS to a number slightly below the total number of available hyperthreads, which is normally a double of number of cores.
Another important parameter is nPopulation. It is defaulting to 2 billion (maximum number of individuals simulated). However, it would require a multicore system with over 196GB of RAM to process this large set. It is recommended to change this number to something much smaller for the initial experiments, for example 100000. Any desktop system should handle this data set.


2. The resulting files can be analyzed and plotted with any suitable software package, including Excel, LibreOffice, R, etc.
