# Supplementary material for: Quantifying the Potential for Future Gene Therapy to Lower Lifetime Risk of Polygenic Late-Onset Diseases
Source: MDPI journal article supplement (doi:10.3390/ijms20133352), 2019-07-08
Supplement: s2 [file s2 › SuppFiles/Results/LODsCommonLow/_LifetimeRiskResults/OnsetDelayAt30percentLevel.txt]

16 -> 4
[1] " - - - - -"
[1] "Alzheimers"
[1] 4
[1] 0.1965673
[1] 0.2022985
[1] " - - - - -"
[1] "T2D"
[1] 7
[1] 0.3194032
[1] 0.3145784
[1] " - - - - -"
[1] "Stroke"
[1] 10
[1] 0.2923028
[1] 0.2928232
[1] " - - - - -"
[1] "CAD"
[1] 10
[1] 0.2695533
[1] 0.2734283
[1] " - - - - -"
[1] "BreastCancer"
[1] 21
[1] 0.2770439
[1] 0.2682862
[1] " - - - - -"
[1] "ProstateCancer"
[1] 17
[1] 0.1232774
[1] 0.1243691
[1] " - - - - -"
[1] "ColorectalCancer"
[1] 13
[1] 0.1227011
[1] 0.1155221
[1] " - - - - -"
[1] "LungCancer"
[1] 10
[1] 0.2115107
[1] 0.1981943

4 -> 1
[1] " - - - - -"
[1] "Alzheimers"
[1] 3
[1] 0.2022985
[1] 0.1968775
[1] " - - - - -"
[1] "T2D"
[1] 12
[1] 0.3145784
[1] 0.3042876
[1] " - - - - -"
[1] "Stroke"
[1] 13
[1] 0.2648142
[1] 0.251237
[1] " - - - - -"
[1] "CAD"
[1] 14
[1] 0.2040296
[1] 0.2004716
[1] " - - - - -"
[1] "BreastCancer"
[1] 31
[1] 0.09889143
[1] 0.08266629
[1] " - - - - -"
[1] "ProstateCancer"
[1] 16
[1] 0.04754851
[1] 0.03935075
[1] " - - - - -"
[1] "ColorectalCancer"
[1] 16
[1] 0.04116659
[1] 0.03328128
[1] " - - - - -"
[1] "LungCancer"
[1] 20
[1] 0.0828379
[1] 0.07117299

2 -> 1
[1] " - - - - -"
[1] "Alzheimers"
[1] 3
[1] 0.160604
[1] 0.1968775
[1] " - - - - -"
[1] "T2D"
[1] 8
[1] 0.3006753
[1] 0.3042876
[1] " - - - - -"
[1] "Stroke"
[1] 8
[1] 0.1554905
[1] 0.1613127
[1] " - - - - -"
[1] "CAD"
[1] 6
[1] 0.1310806
[1] 0.1237125
[1] " - - - - -"
[1] "BreastCancer"
[1] 14
[1] 0.05004489
[1] 0.05040179
[1] " - - - - -"
[1] "ProstateCancer"
[1] 8
[1] 0.0240487
[1] 0.02381635
[1] " - - - - -"
[1] "ColorectalCancer"
[1] 9
[1] 0.02071446
[1] 0.02020616
[1] " - - - - -"
[1] "LungCancer"
[1] 5
[1] 0.04649065
[1] 0.04375381

1 -> 0.5
[1] " - - - - -"
[1] "Alzheimers"
[1] 2
[1] 0.1504235
[1] 0.1434332
[1] " - - - - -"
[1] "T2D"
[1] 6
[1] 0.2548611
[1] 0.2390958
[1] " - - - - -"
[1] "Stroke"
[1] 6
[1] 0.08739442
[1] 0.08093374
[1] " - - - - -"
[1] "CAD"
[1] 9
[1] 0.06626156
[1] 0.0666327
[1] " - - - - -"
[1] "BreastCancer"
[1] 14
[1] 0.02508338
[1] 0.02521143
[1] " - - - - -"
[1] "ProstateCancer"
[1] 8
[1] 0.01205226
[1] 0.01191344
[1] " - - - - -"
[1] "ColorectalCancer"
[1] 9
[1] 0.01037047
[1] 0.01010597
[1] " - - - - -"
[1] "LungCancer"
[1] 5
[1] 0.0233228
[1] 0.02189148

1 -> 0.25
[1] " - - - - -"
[1] "Alzheimers"
[1] 4
[1] 0.1504235
[1] 0.1357667
[1] " - - - - -"
[1] "T2D"
[1] 13
[1] 0.2548611
[1] 0.1988802
[1] " - - - - -"
[1] "Stroke"
[1] 11
[1] 0.08739442
[1] 0.06745866
[1] " - - - - -"
[1] "CAD"
[1] 16
[1] 0.06626156
[1] 0.05300908
[1] " - - - - -"
[1] "BreastCancer"
[1] 37
[1] 0.02508338
[1] 0.02067509
[1] " - - - - -"
[1] "ProstateCancer"
[1] 21
[1] 0.01205226
[1] 0.009842259
[1] " - - - - -"
[1] "ColorectalCancer"
[1] 19
[1] 0.01037047
[1] 0.008323063
[1] " - - - - -"
[1] "LungCancer"
[1] 14
[1] 0.0233228
[1] 0.01780515
