# Supplementary material for: Quantifying the Potential for Future Gene Therapy to Lower Lifetime Risk of Polygenic Late-Onset Diseases
Source: MDPI journal article supplement (doi:10.3390/ijms20133352), 2019-07-08
Supplement: s2 [file s2 › SuppFiles/Results/LODsCommonLow/_LifetimeRiskResults/YearsOfOnsetDelayWithHazardRatioChange.txt]

C:\code\Heritability\R>rscript.exe ProcessEnvHR.R "D:/Science1_data/Frailty/yearlyORtoRR/LODsCommonLow"

OR -> 0.25
[1] "Alzheimers"
[1] 3
[1] 0.4328539
[1] 0.2198167
[1] "T2D"
[1] 20
[1] 0.7866833
[1] 0.1988802
[1] "Stroke"
[1] 17
[1] 0.2684838
[1] 0.06745866
[1] "CAD"
[1] 14
[1] 0.210999
[1] 0.05300908
[1] "BreastCancer"
[1] 100
[1] 0.08266629
[1] 0.02067509
[1] "ProstateCancer"
[1] 29
[1] 0.03935075
[1] 0.009842259
[1] "ColorectalCancer"
[1] 35
[1] 0.03328128
[1] 0.008323063
[1] "LungCancer"
[1] 100
[1] 0.07117299
[1] 0.01780515


OR -> 0.5
[1] "Alzheimers"
[1] 2
[1] 0.4328539
[1] 0.3186182
[1] "T2D"
[1] 9
[1] 0.7866833
[1] 0.3992664
[1] "Stroke"
[1] 8
[1] 0.2684838
[1] 0.1351448
[1] "CAD"
[1] 7
[1] 0.210999
[1] 0.106193
[1] "BreastCancer"
[1] 23
[1] 0.08266629
[1] 0.04135586
[1] "ProstateCancer"
[1] 12
[1] 0.03935075
[1] 0.01968757
[1] "ColorectalCancer"
[1] 14
[1] 0.03328128
[1] 0.01664796
[1] "LungCancer"
[1] 16
[1] 0.07117299
[1] 0.03561823
