# Supplementary material for: Quantifying the Potential for Future Gene Therapy to Lower Lifetime Risk of Polygenic Late-Onset Diseases
Source: MDPI journal article supplement (doi:10.3390/ijms20133352), 2019-07-08
Supplement: s2 [file s2 › SuppFiles/Results/LODsCommonLow/Alzheimers/-1.000/FrailtyAnalysis.csv]

Age	Heritability	MeanOR	CaseOR	nControls	nCases	nCumIncidence	nIncidence	nLifeIncidence0	nAbsIncidence0	nLifeIncidence5	nAbsIncidence5	nLifeIncidence10	nAbsIncidence10	nLifeIncidence15	nAbsIncidence15	nIncActDivExp
38	0.573116	0.237169	0.998971	999999996	4	4e-09	4e-09	3.88982e-09	3.88982e-09	3.91458e-09	3.91458e-09	3.93518e-09	3.93518e-09	3.95314e-09	3.95314e-09	0.00194204
39	0.573116	0.237169	0.650796	999999984	12	1.6e-08	1.2e-08	1.55422e-08	1.16524e-08	1.56447e-08	1.17301e-08	1.57291e-08	1.1794e-08	1.58025e-08	1.18493e-08	0.0026806
40	0.573116	0.237169	0.868733	999999959	25	4.1e-08	2.5e-08	3.97804e-08	2.42383e-08	4.00528e-08	2.44081e-08	4.0275e-08	2.45459e-08	4.04666e-08	2.46641e-08	0.00341843
41	0.573116	0.237169	0.913396	999999933	26	6.7e-08	2.6e-08	6.49473e-08	2.51668e-08	6.54053e-08	2.53525e-08	6.57759e-08	2.55009e-08	6.60939e-08	2.56273e-08	0.002443
42	0.573116	0.237169	0.812793	999999890	43	1.1e-07	4.3e-08	1.06498e-07	4.15503e-08	1.07279e-07	4.18738e-08	1.07905e-07	4.21288e-08	1.08438e-07	4.2344e-08	0.00295528
43	0.573116	0.237169	0.797689	999999831	59	1.69e-07	5.9e-08	1.63403e-07	5.69055e-08	1.64654e-07	5.73748e-08	1.65645e-07	5.77401e-08	1.66482e-07	5.80439e-08	0.00308312
44	0.573116	0.237169	0.866287	999999752	79	2.48e-07	7.9e-08	2.39448e-07	7.60446e-08	2.41365e-07	7.67114e-08	2.42868e-07	7.72233e-08	2.44125e-07	7.76436e-08	0.00322197
45	0.573116	0.237169	0.843058	999999650	102	3.5e-07	1.02e-07	3.37421e-07	9.7973e-08	3.40257e-07	9.88921e-08	3.42453e-07	9.95852e-08	3.44273e-07	1.00147e-07	0.00330775
46	0.573116	0.237169	0.868293	999999513	137	4.87e-07	1.37e-07	4.68704e-07	1.31283e-07	4.72867e-07	1.3261e-07	4.76041e-07	1.33588e-07	4.78643e-07	1.3437e-07	0.00358158
47	0.573116	0.237169	0.871553	999999326	187	6.74e-07	1.87e-07	6.47443e-07	1.78739e-07	6.53563e-07	1.80695e-07	6.58144e-07	1.82102e-07	6.61854e-07	1.83211e-07	0.00398267
48	0.573116	0.237169	0.88046	999999093	233	9.07e-07	2.33e-07	8.69529e-07	2.22086e-07	8.78291e-07	2.24728e-07	8.84726e-07	2.26582e-07	8.89879e-07	2.28024e-07	0.00407579
49	0.573116	0.237169	0.863962	999998763	330	1.237e-06	3.3e-07	1.18311e-06	3.13579e-07	1.19595e-06	3.17655e-07	1.20517e-06	3.2044e-07	1.21246e-06	3.22578e-07	0.00477199
50	0.573117	0.237169	0.871108	999998366	397	1.634e-06	3.97e-07	1.55908e-06	3.75975e-07	1.57727e-06	3.81326e-07	1.59007e-06	3.84903e-07	1.60006e-06	3.87601e-07	0.00477039
51	0.573117	0.237169	0.890816	999997890	476	2.11e-06	4.76001e-07	2.00821e-06	4.49123e-07	2.03341e-06	4.56137e-07	2.05082e-06	4.60747e-07	2.0642e-06	4.64145e-07	0.00477276
52	0.573117	0.237169	0.864367	999997190	700	2.81e-06	7.00001e-07	2.66599e-06	6.57779e-07	2.70249e-06	6.69077e-07	2.72722e-06	6.76399e-07	2.74587e-06	6.81667e-07	0.00587692
53	0.573117	0.237168	0.895846	999996313	877	3.687e-06	8.77002e-07	3.48641e-06	8.20425e-07	3.53841e-06	8.35921e-07	3.57308e-06	8.45866e-07	3.59871e-06	8.52843e-07	0.00618253
54	0.573117	0.237168	0.874973	999995221	1092	4.779e-06	1.092e-06	4.50299e-06	1.01658e-06	4.57607e-06	1.03766e-06	4.62423e-06	1.05115e-06	4.65908e-06	1.06036e-06	0.00647916
55	0.573117	0.237168	0.862844	999993868	1353	6.132e-06	1.35301e-06	5.75584e-06	1.25286e-06	5.85741e-06	1.28135e-06	5.92381e-06	1.29958e-06	5.97085e-06	1.31177e-06	0.00676968
56	0.573117	0.237167	0.861158	999992130	1738	7.87e-06	1.73801e-06	7.35592e-06	1.60008e-06	7.49728e-06	1.63986e-06	7.58929e-06	1.66547e-06	7.65316e-06	1.68231e-06	0.00734513
57	0.573118	0.237166	0.867374	999989945	2185	1.0055e-05	2.18502e-06	9.35496e-06	1.99903e-06	9.55049e-06	2.05321e-06	9.67776e-06	2.08848e-06	9.76449e-06	2.11133e-06	0.0078104
58	0.573118	0.237165	0.86067	999987035	2910	1.2965e-05	2.91003e-06	1.19992e-05	2.64429e-06	1.22728e-05	2.72228e-06	1.24515e-05	2.7737e-06	1.25712e-05	2.8067e-06	0.00880817
59	0.573119	0.237164	0.857079	999983362	3673	1.6638e-05	3.67305e-06	1.53125e-05	3.31321e-06	1.56921e-05	3.41931e-06	1.59417e-05	3.49023e-06	1.61068e-05	3.53559e-06	0.00942336
60	0.573119	0.237163	0.856303	999978620	4742	2.138e-05	4.74208e-06	1.95565e-05	4.24404e-06	2.00831e-05	4.39102e-06	2.04326e-05	4.49086e-06	2.06616e-05	4.55479e-06	0.0103204
61	0.57312	0.237161	0.859977	999972740	5880	2.726e-05	5.88013e-06	2.4775e-05	5.21853e-06	2.54965e-05	5.41339e-06	2.59805e-05	5.54799e-06	2.62962e-05	5.63463e-06	0.0108634
62	0.573121	0.237159	0.866529	999965333	7407	3.4667e-05	7.4072e-06	3.129e-05	6.51494e-06	3.22731e-05	6.77659e-06	3.29408e-05	6.96025e-06	3.3376e-05	7.0798e-06	0.0116237
63	0.573122	0.237156	0.855507	999955792	9541	4.4208e-05	9.54133e-06	3.96012e-05	8.31126e-06	4.09429e-05	8.66981e-06	4.18663e-05	8.92551e-06	4.24701e-05	9.0941e-06	0.0127244
64	0.573124	0.237152	0.84688	999943686	12106	5.6314e-05	1.21065e-05	5.00383e-05	1.04371e-05	5.1863e-05	1.09202e-05	5.31361e-05	1.12698e-05	5.39737e-05	1.15036e-05	0.013727
65	0.573126	0.237147	0.859519	999928069	15617	7.1931e-05	1.56179e-05	6.33539e-05	1.33156e-05	6.58401e-05	1.39771e-05	6.75972e-05	1.44611e-05	6.87636e-05	1.47899e-05	0.0150618
66	0.573129	0.237141	0.860433	999908074	19995	9.1926e-05	1.99964e-05	8.02011e-05	1.68472e-05	8.35858e-05	1.77457e-05	8.60055e-05	1.84083e-05	8.76296e-05	1.8866e-05	0.0164078
67	0.573133	0.237133	0.860594	999882298	25776	0.000117702	2.57784e-05	0.000101643	2.14422e-05	0.000106257	2.26717e-05	0.000109588	2.35822e-05	0.000111851	2.42213e-05	0.0180025
68	0.573137	0.237123	0.858485	999849544	32754	0.000150456	3.27579e-05	0.000128516	2.68732e-05	0.00013479	2.85323e-05	0.000139351	2.97632e-05	0.000142492	3.0641e-05	0.0194755
69	0.573143	0.237111	0.856767	999807926	41618	0.000192074	4.16243e-05	0.000162155	3.36382e-05	0.00017067	3.58805e-05	0.000176892	3.75413e-05	0.000181235	3.87434e-05	0.0210731
70	0.573151	0.237094	0.859398	999753499	54427	0.000246501	5.44375e-05	0.000205435	4.32809e-05	0.000217077	4.64064e-05	0.000225604	4.87116e-05	0.000231634	5.03986e-05	0.0234742
71	0.573161	0.237073	0.86079	999682738	70761	0.000317262	7.07784e-05	0.000260716	5.52803e-05	0.000276698	5.96211e-05	0.000288405	6.28007e-05	0.00029678	6.51458e-05	0.0260019
72	0.573174	0.237045	0.857859	999591216	91522	0.000408784	9.1551e-05	0.000330838	7.01219e-05	0.000352832	7.61339e-05	0.000368904	8.04995e-05	0.000380512	8.37326e-05	0.0286601
73	0.57319	0.237009	0.855716	999472952	118264	0.000527048	0.000118312	0.000419533	8.8695e-05	0.000449862	9.70303e-05	0.000471925	0.000103021	0.000487978	0.000107465	0.0315685
74	0.573212	0.236962	0.860063	999319414	153538	0.000680586	0.000153619	0.000532015	0.000112483	0.000573961	0.000124099	0.000604296	0.000132371	0.000626476	0.000138498	0.0349449
75	0.57324	0.2369	0.858222	999118368	201046	0.000881632	0.000201183	0.000675575	0.00014356	0.000733834	0.000159874	0.000775715	0.000171419	0.00080641	0.000179934	0.0390262
76	0.573276	0.23682	0.858156	998855958	262410	0.00114404	0.000262642	0.000857777	0.000182202	0.000938836	0.000205001	0.000996814	0.000221099	0.0010393	0.00023289	0.0434585
77	0.573325	0.236715	0.858859	998512225	343733	0.00148777	0.000344127	0.00108921	0.00023143	0.0012022	0.00026336	0.00128275	0.000285939	0.00134164	0.000302336	0.0485857
78	0.573388	0.236577	0.857184	998060678	451547	0.00193932	0.00045222	0.00138306	0.000293855	0.00154084	0.000338649	0.00165323	0.000370474	0.00173498	0.000393347	0.0544963
79	0.573471	0.236395	0.857157	997464275	596403	0.00253572	0.000597562	0.00175686	0.000373802	0.00197777	0.000436928	0.00213528	0.000482049	0.00224917	0.000514183	0.0614886
80	0.573582	0.236155	0.857208	996675620	788655	0.00332438	0.00079066	0.00223103	0.000474163	0.00254092	0.000563151	0.00276242	0.000627146	0.0029216	0.000672435	0.0695002
81	0.573729	0.235834	0.856918	995626572	1049048	0.00437343	0.00105255	0.00283336	0.000602337	0.00326932	0.000728396	0.00358197	0.000819543	0.0038055	0.000883896	0.0790753
82	0.573925	0.235405	0.856685	994224409	1402163	0.00577559	0.00140832	0.00359824	0.000764873	0.00421337	0.000944055	0.00465627	0.0010743	0.00497191	0.00116641	0.0904805
83	0.574189	0.234829	0.856316	992341803	1882606	0.0076582	0.00189354	0.00456811	0.000969872	0.00543853	0.00122515	0.00606817	0.00141191	0.0065165	0.00154459	0.104105
84	0.574546	0.234049	0.856046	989794844	2546959	0.0102052	0.00256661	0.00579923	0.00123112	0.00703486	0.00159633	0.00793409	0.00186591	0.00857511	0.00205861	0.120846
85	0.575032	0.232987	0.854998	986332332	3462512	0.0136677	0.00349821	0.00735842	0.00155919	0.00911663	0.00208177	0.0104065	0.00247246	0.0113285	0.00275342	0.141182
86	0.575697	0.23153	0.854003	981592343	4739989	0.0184077	0.00480567	0.00933116	0.00197274	0.0118382	0.00272158	0.0136977	0.00329116	0.0150315	0.003703	0.166415
87	0.576617	0.229509	0.853326	975037435	6554908	0.0249626	0.00667783	0.0118301	0.00249896	0.0154139	0.00357567	0.018111	0.00441332	0.0200537	0.00502221	0.198652
88	0.577901	0.226677	0.851855	965893758	9143677	0.0341062	0.00937777	0.0149908	0.00316069	0.0201245	0.00471059	0.0240615	0.00595048	0.0269113	0.00685753	0.239975
89	0.579713	0.222659	0.849936	952997617	12896141	0.0470024	0.0133515	0.018986	0.00399516	0.0263581	0.00623361	0.0321443	0.00808279	0.036359	0.00944778	0.294364
90	0.582304	0.216862	0.847192	934547982	18449635	0.065452	0.0193596	0.0240413	0.00505529	0.034666	0.00830796	0.0432368	0.0110925	0.0495333	0.0131742	0.368398
91	0.586047	0.208376	0.843284	907863692	26684290	0.0921363	0.0285532	0.0304131	0.00637181	0.0457718	0.0111057	0.0585582	0.0153215	0.0680612	0.018528	0.469928
92	0.59149	0.195752	0.837958	868845754	39017938	0.131154	0.0429777	0.0383998	0.00798678	0.0606468	0.014875	0.0798423	0.0212841	0.0943314	0.0262702	0.613181
93	0.599328	0.176836	0.829572	811721479	57124275	0.188279	0.0657473	0.0482435	0.00984366	0.0803929	0.0197461	0.109271	0.029429	0.131506	0.0371751	0.815337
94	0.61	0.148926	0.815549	729720990	82000489	0.270279	0.10102	0.0599048	0.0116613	0.105796	0.0254033	0.148908	0.0396366	0.182901	0.0513946	1.09213
95	0.621978	0.110152	0.791007	618090940	111630050	0.381909	0.152976	0.0727272	0.0128224	0.136383	0.0305872	0.199175	0.0502676	0.250016	0.0671153	1.44658
96	0.625255	0.064345	0.742134	482200352	135890588	0.5178	0.219855	0.0850443	0.0123171	0.168832	0.0324486	0.255732	0.0565563	0.328041	0.078025	1.82525
97	0.584552	0.0277934	0.627032	352302209	129898143	0.647698	0.269386	0.0941164	0.00907209	0.195422	0.0265895	0.305253	0.0495217	0.3989	0.0708588	1.97155
98	0.547406	0.0166965	0.269065	287716422	64585787	0.712284	0.183325	0.0975097	0.00339334	0.206551	0.0111294	0.327579	0.0223254	0.432173	0.033273	1.1881
99	0.526539	0.0111084	0.116627	237852814	49863608	0.762147	0.173308	0.0994342	0.00192449	0.213642	0.0070911	0.343026	0.0154475	0.456276	0.0241026	0.999465
100	0.50526	0.00720426	0.0673171	191763333	46089481	0.808237	0.193773	0.100712	0.00127737	0.218936	0.00529407	0.355655	0.0126287	0.47703	0.0207543	0.999635
101	0.483719	0.0045561	0.0382104	150445982	41317351	0.849554	0.21546	0.101516	0.000804449	0.222681	0.003745	0.365521	0.00986596	0.494226	0.0171959	0.999866
102	0.462072	0.00281211	0.0213414	114627039	35818943	0.885373	0.238085	0.101995	0.00047872	0.225183	0.00250159	0.372853	0.00733196	0.507881	0.0136554	0.999747
103	0.440477	0.0016954	0.0117336	84643940	29983099	0.915356	0.261571	0.102263	0.000268049	0.226758	0.00157531	0.37802	0.00516669	0.518246	0.0103643	0.999975
104	0.419153	0.00100015	0.00635367	60482262	24161678	0.939518	0.285451	0.102403	0.0001405	0.227691	0.00093252	0.381456	0.00343603	0.525731	0.00748517	0.999784
105	0.398214	0.000578202	0.00339517	41759151	18723111	0.958241	0.309564	0.102472	6.87138e-05	0.22821	0.000518911	0.383606	0.00215063	0.530861	0.00513023	0.99971
106	0.377934	0.000328397	0.00179113	27833488	13925663	0.972167	0.333476	0.102503	3.11935e-05	0.228481	0.000271133	0.384869	0.00126222	0.534186	0.00332524	0.999349
107	0.358327	0.000183418	0.000935637	17884332	9949156	0.982116	0.357453	0.102516	1.30831e-05	0.228614	0.00013297	0.385563	0.000694849	0.536223	0.00203654	1.00035
108	0.339594	0.000101117	0.000484266	11085197	6799135	0.988915	0.380173	0.102521	5.06536e-06	0.228674	6.07843e-05	0.385921	0.000357227	0.537394	0.00117163	0.999727
109	0.321726	5.51804e-05	0.000249361	6633790	4451407	0.993366	0.401563	0.102523	1.78056e-06	0.2287	2.58849e-05	0.386092	0.000171802	0.538027	0.000633035	0.998195
110	0.304779	2.98924e-05	0.000127808	3834925	2798865	0.996165	0.42191	0.102524	5.73767e-07	0.228711	1.02718e-05	0.38617	7.75705e-05	0.538349	0.000321492	0.997048
111	0.288521	1.60187e-05	6.53904e-05	2134097	1700828	0.997866	0.44351	0.102524	1.70083e-07	0.228714	3.80985e-06	0.386203	3.31151e-05	0.538503	0.000154163	1.00177
112	0.273191	8.54356e-06	3.3256e-05	1147057	987040	0.998853	0.462509	0.102524	4.44168e-08	0.228716	1.29796e-06	0.386216	1.31918e-05	0.538572	6.89349e-05	1.00352
113	0.258616	4.55205e-06	1.69304e-05	597251	549806	0.999403	0.479319	0.102524	1.09961e-08	0.228716	4.09605e-07	0.386221	4.91527e-06	0.538601	2.88868e-05	1.00364
114	0.244982	2.44109e-06	8.64854e-06	303035	294216	0.999697	0.492617	0.102524	1.47108e-09	0.228716	1.17686e-07	0.386223	1.71087e-06	0.538612	1.13553e-05	0.999664
115	0.232264	1.31728e-06	4.46172e-06	149806	153229	0.99985	0.505648	0.102524	0	0.228716	3.14119e-08	0.386224	5.6235e-07	0.538617	4.24674e-06	0.998275
116	0.221293	7.22937e-07	2.33508e-06	73144	76662	0.999927	0.511742	0.102524	0	0.228716	7.6662e-09	0.386224	1.71723e-07	0.538618	1.49261e-06	0.986306
117	0.209786	3.92553e-07	1.24161e-06	34355	38789	0.999966	0.53031	0.102524	0	0.228716	1.74551e-09	0.386224	5.10075e-08	0.538619	5.18415e-07	1.0009
118	0.199466	2.12704e-07	6.48711e-07	15476	18879	0.999985	0.549527	0.102524	0	0.228716	3.7758e-10	0.386224	1.40649e-08	0.538619	1.68778e-07	1.01846
119	0.188063	1.12683e-07	3.42044e-07	6621	8855	0.999993	0.572176	0.102524	0	0.228716	4.4275e-11	0.386224	3.542e-09	0.538619	5.14918e-08	1.04384
120	0.179811	5.99546e-08	1.73394e-07	2687	3934	0.999997	0.59417	0.102524	0	0.228716	0	0.386224	8.0647e-10	0.538619	1.44378e-08	1.06928
