# Supplementary material for: Quantifying the Potential for Future Gene Therapy to Lower Lifetime Risk of Polygenic Late-Onset Diseases
Source: MDPI journal article supplement (doi:10.3390/ijms20133352), 2019-07-08
Supplement: s2 [file s2 › SuppFiles/Results/LODsCommonLow/Alzheimers/-1.000/IndividualsByBetaDistrib.csv]

nEntry	Beta	nDetrimentalCount	nFractionPopulation	nCumulativeFractionPopulation	nEditsNeeded	nIndividuals
0	-19.8	1858.3	1.7e-08	1	0	17
1	-19.6	1860.6	5e-09	0.99999998	0	5
2	-19.4	1863.5	1.1e-08	0.99999998	0	11
3	-19.2	1861.3	1e-08	0.99999997	0	10
4	-19	1863	1.5e-08	0.99999996	0	15
5	-18.8	1869.5	2.4e-08	0.99999994	0	24
6	-18.6	1873.5	3e-08	0.99999992	0	30
7	-18.4	1877.9	3.5e-08	0.99999989	0	35
8	-18.2	1876.3	6.1e-08	0.99999985	0	61
9	-18	1878.1	8.3e-08	0.99999979	0	83
10	-17.8	1880.8	9.4e-08	0.99999971	0	94
11	-17.6	1881	1.32e-07	0.99999962	0	132
12	-17.4	1883.1	1.98e-07	0.99999948	0	198
13	-17.2	1886	2.28e-07	0.99999929	0	228
14	-17	1888	2.94e-07	0.99999906	0	294
15	-16.8	1889.5	3.92e-07	0.99999876	0	392
16	-16.6	1892.4	5.24e-07	0.99999837	0	524
17	-16.4	1894.1	6.89e-07	0.99999785	0	689
18	-16.2	1895.4	9.11e-07	0.99999716	0	911
19	-16	1897.1	1.158e-06	0.99999625	0	1158
20	-15.8	1898.4	1.497e-06	0.99999509	0	1497
21	-15.6	1901.1	1.949e-06	0.99999359	0	1949
22	-15.4	1902.6	2.399e-06	0.99999164	0	2399
23	-15.2	1904.6	3.025e-06	0.99998924	0	3025
24	-15	1906.5	3.797e-06	0.99998622	0	3797
25	-14.8	1908.7	5.05e-06	0.99998242	0	5050
26	-14.6	1910.5	6.208e-06	0.99997737	0	6208
27	-14.4	1912.3	7.916e-06	0.99997116	0	7916
28	-14.2	1914.2	9.804e-06	0.99996325	0	9804
29	-14	1916	1.2046e-05	0.99995344	0	12046
30	-13.8	1918	1.5288e-05	0.9999414	0	15288
31	-13.6	1919.9	1.8867e-05	0.99992611	0	18867
32	-13.4	1921.8	2.3046e-05	0.99990724	0	23046
33	-13.2	1923.8	2.8361e-05	0.9998842	0	28361
34	-13	1925.5	3.4936e-05	0.99985584	0	34936
35	-12.8	1927.5	4.2837e-05	0.9998209	0	42837
36	-12.6	1929.4	5.1463e-05	0.99977806	0	51463
37	-12.4	1931.3	6.2804e-05	0.9997266	0	62804
38	-12.2	1933.2	7.6223e-05	0.9996638	0	76223
39	-12	1935.1	9.1568e-05	0.99958757	0	91568
40	-11.8	1937	0.000109935	0.99949601	0	109935
41	-11.6	1938.9	0.00013202	0.99938607	0	132020
42	-11.4	1940.8	0.000157512	0.99925405	0	157512
43	-11.2	1942.7	0.000187585	0.99909654	0	187585
44	-11	1944.6	0.000223061	0.99890895	0	223061
45	-10.8	1946.5	0.000263679	0.99868589	0	263679
46	-10.6	1948.3	0.000311533	0.99842221	0	311533
47	-10.4	1950.2	0.000365524	0.99811068	0	365524
48	-10.2	1952.2	0.000428632	0.99774516	0	428632
49	-10	1954.1	0.000501185	0.99731652	0	501185
50	-9.8	1955.9	0.000582605	0.99681534	0	582605
51	-9.6	1957.8	0.000677936	0.99623273	0	677936
52	-9.4	1959.7	0.000783812	0.9955548	0	783812
53	-9.2	1961.6	0.000904351	0.99477099	0	904351
54	-9	1963.5	0.001041353	0.99386664	0	1041353
55	-8.8	1965.4	0.00119265	0.99282528	0	1192650
56	-8.6	1967.3	0.001363231	0.99163263	0	1363231
57	-8.4	1969.2	0.001554752	0.9902694	0	1554752
58	-8.2	1971.1	0.001765526	0.98871465	0	1765526
59	-8	1973	0.001996236	0.98694912	0	1996236
60	-7.8	1974.9	0.00225677	0.98495289	0	2256770
61	-7.6	1976.8	0.002535311	0.98269612	0	2535311
62	-7.4	1978.7	0.002843839	0.98016081	0	2843839
63	-7.2	1980.6	0.003179889	0.97731697	0	3179889
64	-7	1982.5	0.003543263	0.97413708	0	3543263
65	-6.8	1984.4	0.003939393	0.97059381	0	3939393
66	-6.6	1986.3	0.004362655	0.96665442	0	4362655
67	-6.4	1988.2	0.004815978	0.96229177	0	4815978
68	-6.2	1990	0.005294453	0.95747579	0	5294453
69	-6	1991.9	0.005811022	0.95218134	0	5811022
70	-5.8	1993.8	0.006356531	0.94637031	0	6356531
71	-5.6	1995.7	0.006933329	0.94001378	0	6933329
72	-5.4	1997.6	0.007525639	0.93308045	0	7525639
73	-5.2	1999.5	0.008161583	0.92555482	0	8161583
74	-5	2001.4	0.008822807	0.91739323	0	8822807
75	-4.8	2003.3	0.009492451	0.90857042	0	9492451
76	-4.6	2005.2	0.010183932	0.89907797	0	10183932
77	-4.4	2007.1	0.010906605	0.88889404	0	10906605
78	-4.2	2009	0.01163267	0.87798744	0	11632670
79	-4	2010.9	0.012365228	0.86635477	0	12365228
80	-3.8	2012.8	0.013113739	0.85398954	0	13113739
81	-3.6	2014.7	0.013860916	0.8408758	0	13860916
82	-3.4	2016.5	0.01460465	0.82701488	0	14604650
83	-3.2	2018.4	0.015339112	0.81241023	0	15339112
84	-3	2020.3	0.016066216	0.79707112	0	16066216
85	-2.8	2022.2	0.016768564	0.78100491	0	16768564
86	-2.6	2024.1	0.017441307	0.76423634	0	17441307
87	-2.4	2026	0.018100357	0.74679503	0	18100357
88	-2.2	2027.9	0.018715631	0.72869468	0	18715631
89	-2	2029.8	0.019307211	0.70997905	0	19307211
90	-1.8	2031.7	0.019832937	0.69067184	0	19832937
91	-1.6	2033.6	0.02032877	0.6708389	0	20328770
92	-1.4	2035.5	0.020763322	0.65051013	0	20763322
93	-1.2	2037.4	0.021152862	0.62974681	0	21152862
94	-1	2039.3	0.021460632	0.60859394	0	21460632
95	-0.8	2041.2	0.021726678	0.58713331	0	21726678
96	-0.6	2043.1	0.021921541	0.56540663	0	21921541
97	-0.4	2044.9	0.022048021	0.54348509	0	22048021
98	-0.2	2046.8	0.022113295	0.52143707	0	22113295
99	0	2048.7	0.022103802	0.49932378	0	22103802
100	0.2	2050.6	0.022025958	0.47721998	1.8894	22025958
101	0.4	2052.5	0.021888349	0.45519402	3.7831	21888349
102	0.6	2054.4	0.021682158	0.43330567	5.6707	21682158
103	0.8	2056.3	0.021407966	0.41162351	7.5592	21407966
104	1	2058.2	0.021075849	0.39021554	9.4558	21075849
105	1.2	2060.1	0.020684323	0.3691397	11.342	20684323
106	1.4	2062	0.020248154	0.34845537	13.235	20248154
107	1.6	2063.8	0.019752409	0.32820722	15.127	19752409
108	1.8	2065.7	0.019209557	0.30845481	17.02	19209557
109	2	2067.6	0.018620632	0.28924525	18.911	18620632
110	2.2	2069.5	0.018000973	0.27062462	20.801	18000973
111	2.4	2071.4	0.017351725	0.25262365	22.691	17351725
112	2.6	2073.3	0.016662678	0.23527192	24.576	16662678
113	2.8	2075.2	0.015955315	0.21860925	26.474	15955315
114	3	2077.1	0.015235651	0.20265393	28.362	15235651
115	3.2	2079	0.014500929	0.18741828	30.252	14500929
116	3.4	2080.9	0.013773795	0.17291735	32.14	13773795
117	3.6	2082.8	0.013030748	0.15914355	34.033	13030748
118	3.8	2084.6	0.012287914	0.14611281	35.927	12287914
119	4	2086.5	0.011555747	0.13382489	37.81	11555747
120	4.2	2088.4	0.010837336	0.12226915	39.697	10837336
121	4.4	2090.3	0.010129422	0.11143181	41.592	10129422
122	4.6	2092.2	0.009441025	0.10130239	43.482	9441025
123	4.8	2094.1	0.008770724	0.091861363	45.378	8770724
124	5	2096	0.008123841	0.083090639	47.258	8123841
125	5.2	2097.9	0.007504215	0.074966798	49.154	7504215
126	5.4	2099.8	0.006906863	0.067462583	51.043	6906863
127	5.6	2101.7	0.00633821	0.06055572	52.932	6338210
128	5.8	2103.5	0.005798217	0.05421751	54.824	5798217
129	6	2105.4	0.005294574	0.048419293	56.702	5294574
130	6.2	2107.3	0.004814471	0.043124719	58.593	4814471
131	6.4	2109.2	0.00437005	0.038310248	60.47	4370050
132	6.6	2111.1	0.003949047	0.033940198	62.373	3949047
133	6.8	2113	0.003559721	0.029991151	64.268	3559721
134	7	2114.9	0.003197375	0.02643143	66.147	3197375
135	7.2	2116.8	0.002863396	0.023234055	68.047	2863396
136	7.4	2118.7	0.002559037	0.020370659	69.929	2559037
137	7.6	2120.5	0.002278795	0.017811622	71.808	2278795
138	7.8	2122.4	0.002026019	0.015532827	73.708	2026019
139	8	2124.3	0.001791898	0.013506808	75.597	1791898
140	8.2	2126.2	0.001581113	0.01171491	77.493	1581113
141	8.4	2128.1	0.001391965	0.010133797	79.381	1391965
142	8.6	2130	0.001220838	0.008741832	81.256	1220838
143	8.8	2131.9	0.0010686	0.007520994	83.138	1068600
144	9	2133.8	0.000930744	0.006452394	85.035	930744
145	9.2	2135.6	0.000810424	0.00552165	86.908	810424
146	9.4	2137.5	0.000702746	0.004711226	88.809	702746
147	9.6	2139.4	0.000607663	0.00400848	90.697	607663
148	9.8	2141.3	0.000521277	0.003400817	92.597	521277
149	10	2143.2	0.000449663	0.00287954	94.466	449663
150	10.2	2145.1	0.000384466	0.002429877	96.365	384466
151	10.4	2147	0.00032856	0.002045411	98.275	328560
152	10.6	2148.9	0.00027862	0.001716851	100.15	278620
153	10.8	2150.8	0.00023775	0.001438231	102.04	237750
154	11	2152.6	0.000201352	0.001200481	103.92	201352
155	11.2	2154.5	0.000170093	0.000999129	105.8	170093
156	11.4	2156.4	0.000142919	0.000829036	107.69	142919
157	11.6	2158.3	0.000119426	0.000686117	109.54	119426
158	11.8	2160.1	0.000100451	0.000566691	111.42	100451
159	12	2162.1	8.3705e-05	0.00046624	113.36	83705
160	12.2	2164	6.9926e-05	0.000382535	115.25	69926
161	12.4	2165.8	5.7206e-05	0.000312609	117.07	57206
162	12.6	2167.7	4.736e-05	0.000255403	118.99	47360
163	12.8	2169.6	3.9452e-05	0.000208043	120.85	39452
164	13	2171.4	3.2297e-05	0.000168591	122.72	32297
165	13.2	2173.4	2.6256e-05	0.000136294	124.64	26256
166	13.4	2175.2	2.1494e-05	0.000110038	126.47	21494
167	13.6	2177.2	1.7482e-05	8.8544e-05	128.46	17482
168	13.8	2179	1.4157e-05	7.1062e-05	130.33	14157
169	14	2181	1.155e-05	5.6905e-05	132.25	11550
170	14.2	2182.8	9.238e-06	4.5355e-05	134.04	9238
171	14.4	2184.6	7.389e-06	3.6117e-05	135.92	7389
172	14.6	2186.6	5.93e-06	2.8728e-05	137.85	5930
173	14.8	2188.5	4.948e-06	2.2798e-05	139.8	4948
174	15	2190.2	3.788e-06	1.785e-05	141.47	3788
175	15.2	2192	2.934e-06	1.4062e-05	143.28	2934
176	15.4	2194.2	2.458e-06	1.1128e-05	145.52	2458
177	15.6	2196.2	1.907e-06	8.67e-06	147.47	1907
178	15.8	2197.9	1.527e-06	6.763e-06	149.17	1527
179	16	2200.1	1.107e-06	5.236e-06	151.37	1107
180	16.2	2201.7	9.43e-07	4.129e-06	153.02	943
181	16.4	2203	6.75e-07	3.186e-06	154.31	675
182	16.6	2205.5	6.16e-07	2.511e-06	156.83	616
183	16.8	2207.1	4.56e-07	1.895e-06	158.36	456
184	17	2208.9	3.29e-07	1.439e-06	160.21	329
185	17.2	2210.1	2.95e-07	1.11e-06	161.41	295
186	17.4	2214.4	1.86e-07	8.15e-07	165.64	186
187	17.6	2214.5	1.58e-07	6.29e-07	165.82	158
188	17.8	2219.5	1.23e-07	4.71e-07	170.76	123
189	18	2217.5	8.4e-08	3.48e-07	168.83	84
190	18.2	2218.3	6.9e-08	2.64e-07	169.63	69
191	18.4	2223	4.6e-08	1.95e-07	174.28	46
192	18.6	2223.5	4e-08	1.49e-07	174.8	40
193	18.8	2225.9	2.7e-08	1.09e-07	177.17	27
194	19	2231.3	2.8e-08	8.2e-08	182.53	28
195	19.2	2222.6	9e-09	5.4e-08	173.83	9
196	19.4	2232.4	1.9e-08	4.5e-08	183.7	19
197	19.6	2231	8e-09	2.6e-08	182.28	8
198	19.8	2244.4	5e-09	1.8e-08	195.68	5
199	20	2242.7	1.3e-08	1.3e-08	193.97	13
