# Supplementary material for: Quantifying the Potential for Future Gene Therapy to Lower Lifetime Risk of Polygenic Late-Onset Diseases
Source: MDPI journal article supplement (doi:10.3390/ijms20133352), 2019-07-08
Supplement: s2 [file s2 › SuppFiles/Results/LODsCommonLow/Alzheimers/0.250/FrailtyAnalysis.csv]

Age	Heritability	MeanOR	CaseOR	nControls	nCases	nCumIncidence	nIncidence	nLifeIncidence0	nAbsIncidence0	nLifeIncidence5	nAbsIncidence5	nLifeIncidence10	nAbsIncidence10	nLifeIncidence15	nAbsIncidence15	nIncActDivExp
38	0.798167	0.250028	18813.5	999999335	665	6.65e-07	6.65e-07	6.46683e-07	6.46683e-07	6.50799e-07	6.50799e-07	6.54224e-07	6.54224e-07	6.5721e-07	6.5721e-07	0.322865
39	0.798165	0.250024	12464	999997863	1472	2.137e-06	1.472e-06	2.07604e-06	1.42936e-06	2.08969e-06	1.43889e-06	2.10095e-06	1.44673e-06	2.11073e-06	1.45352e-06	0.32882
40	0.798162	0.250017	10212.3	999995342	2521	4.658e-06	2.52101e-06	4.52022e-06	2.44419e-06	4.55101e-06	2.46132e-06	4.57616e-06	2.47521e-06	4.59786e-06	2.48713e-06	0.344715
41	0.798157	0.250008	7471.04	999991607	3735	8.393e-06	3.73502e-06	8.13554e-06	3.61531e-06	8.19299e-06	3.64198e-06	8.23946e-06	3.66331e-06	8.27932e-06	3.68146e-06	0.350948
42	0.798151	0.249995	6949.55	999986448	5159	1.3552e-05	5.15904e-06	1.31206e-05	4.98506e-06	1.32169e-05	5.02389e-06	1.32939e-05	5.05448e-06	1.33596e-05	5.0803e-06	0.354567
43	0.798143	0.249977	6028.38	999979484	6964	2.0516e-05	6.96409e-06	1.98374e-05	6.71678e-06	1.99891e-05	6.77218e-06	2.01092e-05	6.81528e-06	2.02108e-05	6.85115e-06	0.363917
44	0.798133	0.249955	4945.47	999970504	8980	2.9496e-05	8.98018e-06	2.84814e-05	8.64406e-06	2.87089e-05	8.71985e-06	2.88873e-05	8.77804e-06	2.90366e-05	8.82581e-06	0.366252
45	0.79812	0.249927	4358.71	999958910	11594	4.109e-05	1.15943e-05	3.96177e-05	1.11363e-05	3.99496e-05	1.12407e-05	4.02068e-05	1.13195e-05	4.042e-05	1.13834e-05	0.375992
46	0.798105	0.249892	3989.64	999944547	14363	5.5453e-05	1.43636e-05	5.33813e-05	1.37636e-05	5.38524e-05	1.39027e-05	5.42121e-05	1.40053e-05	5.45073e-05	1.40873e-05	0.375506
47	0.798086	0.249849	3453.11	999926663	17884	7.3337e-05	1.7885e-05	7.04753e-05	1.7094e-05	7.11334e-05	1.7281e-05	7.16277e-05	1.74156e-05	7.20289e-05	1.75217e-05	0.380909
48	0.798064	0.249797	3209.88	999904574	22089	9.5426e-05	2.20906e-05	9.15297e-05	2.10544e-05	9.24383e-05	2.13048e-05	9.31082e-05	2.14806e-05	9.36462e-05	2.16173e-05	0.386424
49	0.798037	0.249734	2806.59	999877383	27191	0.000122617	2.71936e-05	0.000117368	2.5838e-05	0.000118612	2.61738e-05	0.000119512	2.64033e-05	0.000120226	2.65795e-05	0.393234
50	0.798006	0.249658	2475.85	999844380	33003	0.00015562	3.3007e-05	0.000148623	3.12552e-05	0.000150312	3.17e-05	0.000151509	3.19974e-05	0.000152447	3.22217e-05	0.396615
51	0.797968	0.249567	2195.01	999804363	40017	0.000195637	4.00232e-05	0.00018638	3.77574e-05	0.000188659	3.83471e-05	0.000190244	3.87347e-05	0.000191468	3.90204e-05	0.401305
52	0.797925	0.249459	1991.3	999756022	48341	0.000243978	4.83505e-05	0.000231806	4.54253e-05	0.000234865	4.62055e-05	0.000236955	4.67112e-05	0.000238543	4.70749e-05	0.405931
53	0.797873	0.249329	1788.84	999697508	58514	0.000302492	5.85283e-05	0.000286545	5.47393e-05	0.000290638	5.57732e-05	0.000293392	5.64368e-05	0.000295445	5.69022e-05	0.412602
54	0.797814	0.249177	1585.78	999627849	69659	0.000372151	6.96801e-05	0.000351392	6.48477e-05	0.000356831	6.61928e-05	0.000360445	6.70531e-05	0.000363086	6.7641e-05	0.413431
55	0.797744	0.248996	1429.54	999544148	83701	0.000455852	8.37322e-05	0.000428898	7.75059e-05	0.000436099	7.92682e-05	0.000440841	8.03965e-05	0.000444237	8.11506e-05	0.418948
56	0.797663	0.248783	1278.61	999443991	100157	0.000556009	0.000100203	0.000521107	9.2209e-05	0.000530601	9.45016e-05	0.000536818	9.59774e-05	0.000541184	9.69475e-05	0.423474
57	0.797569	0.248532	1145.46	999324025	119966	0.000675975	0.000120033	0.000630863	0.000109756	0.000643331	0.00011273	0.000651485	0.000114667	0.000657105	0.000115921	0.42906
58	0.79746	0.248236	1017.06	999181167	142858	0.000818833	0.000142955	0.000760677	0.000129814	0.000776973	0.000133642	0.000787652	0.000136167	0.000794892	0.000137787	0.4327
59	0.797332	0.247886	917.361	999009472	171695	0.000990528	0.000171836	0.000915553	0.000154877	0.000936809	0.000159836	0.000950803	0.000163151	0.000960164	0.000165272	0.440852
60	0.797184	0.247474	823.743	998804552	204920	0.00119545	0.000205123	0.00109895	0.000183401	0.00112656	0.000189753	0.00114487	0.000194067	0.00115699	0.00019683	0.446419
61	0.797014	0.246992	735.893	998560930	243622	0.00143907	0.000243914	0.00131517	0.000216216	0.00135085	0.000224289	0.00137474	0.000229866	0.00139045	0.000233456	0.450626
62	0.796817	0.246425	655.815	998270340	290590	0.00172966	0.000291009	0.00157076	0.000255593	0.00161671	0.000265858	0.0016478	0.000273063	0.0016682	0.000277753	0.456665
63	0.79659	0.245763	587.084	997924841	345499	0.00207516	0.000346098	0.00187173	0.000300968	0.00193066	0.000313951	0.00197101	0.000323211	0.00199752	0.000329316	0.461558
64	0.796327	0.244988	524.41	997514058	410783	0.00248594	0.000411637	0.00222588	0.000354152	0.00230121	0.000370545	0.00235342	0.00038241	0.00238786	0.000390342	0.466736
65	0.796025	0.244084	469.262	997026204	487854	0.0029738	0.00048907	0.00264184	0.000415961	0.00273783	0.000436624	0.00280517	0.000451745	0.00284988	0.000462017	0.471655
66	0.795679	0.243032	414.266	996447713	578491	0.00355229	0.000580216	0.00312926	0.000487419	0.00325124	0.000513414	0.00333775	0.000532585	0.0033957	0.000545827	0.47609
67	0.795278	0.241803	371.705	995759129	688584	0.00424087	0.000691039	0.00370207	0.000572809	0.0038569	0.000605654	0.00396773	0.000629979	0.00404276	0.000647052	0.482591
68	0.794817	0.240372	328.371	994940503	818626	0.0050595	0.000822112	0.00437372	0.000671646	0.00457001	0.000713113	0.00471161	0.000743877	0.00480857	0.000765816	0.48877
69	0.794288	0.238712	292.131	993970730	969773	0.00602927	0.000974705	0.00515755	0.000783829	0.00540609	0.00083608	0.00558639	0.000874779	0.00571136	0.000902791	0.493462
70	0.79368	0.236785	258.631	992819098	1151632	0.0071809	0.00115862	0.00607334	0.000915789	0.00638801	0.000981922	0.00661708	0.0010307	0.00677776	0.00106639	0.499611
71	0.792979	0.234548	228.524	991449433	1369665	0.00855057	0.00137957	0.00714335	0.00107002	0.00754205	0.00115404	0.00783267	0.00121558	0.00803873	0.00126098	0.506813
72	0.792175	0.231967	201.288	989828123	1621310	0.0101719	0.00163529	0.00838556	0.00124221	0.00889076	0.00134871	0.00925872	0.00142605	0.00952205	0.00148332	0.511929
73	0.791251	0.228988	176.787	987903771	1924352	0.0120962	0.00194413	0.00982878	0.00144322	0.0104696	0.00157884	0.010935	0.00167632	0.0112707	0.00174864	0.518739
74	0.790189	0.225561	155.295	985624585	2279186	0.0143754	0.00230709	0.0114985	0.00166974	0.0123118	0.00184217	0.0129	0.00196498	0.0133266	0.00205593	0.524813
75	0.788969	0.221629	135.93	982924191	2700394	0.0170758	0.00273978	0.0134268	0.00192826	0.0144592	0.00214738	0.0152025	0.00230245	0.0157434	0.00241683	0.531473
76	0.787567	0.21714	118.506	979732556	3191635	0.0202674	0.00324708	0.0156429	0.00221608	0.0169525	0.00249339	0.0178916	0.00268918	0.018576	0.00283259	0.537285
77	0.785952	0.212021	103.02	975954230	3778326	0.0240458	0.00385649	0.0181867	0.00254389	0.0198474	0.00289486	0.0210347	0.00314306	0.0218993	0.00332328	0.54448
78	0.784097	0.206224	88.767	971493141	4461089	0.0285069	0.004571	0.0210899	0.00290317	0.0231931	0.00334571	0.0246948	0.00366012	0.0257854	0.0038861	0.550844
79	0.781961	0.199686	76.381	966229706	5263435	0.0337703	0.00541788	0.0243888	0.00329891	0.0270491	0.00385602	0.028949	0.00425422	0.0303232	0.00453782	0.557495
80	0.779499	0.192354	65.2428	960026238	6203468	0.0399738	0.00642028	0.0281185	0.00372971	0.0314788	0.00442968	0.0338821	0.00493306	0.0356125	0.00528929	0.564353
81	0.776658	0.184183	55.3585	952722862	7303376	0.0472771	0.00760748	0.0323119	0.00419342	0.0365498	0.00507103	0.0395877	0.00570558	0.0417661	0.00615361	0.571531
82	0.773378	0.175153	46.5041	944142114	8580748	0.0558579	0.00900655	0.0369927	0.00468076	0.0423271	0.00577729	0.046162	0.00657435	0.0489042	0.00713802	0.578644
83	0.769585	0.165254	38.6969	934075172	10066942	0.0659248	0.0106625	0.0421789	0.00518624	0.0488784	0.00655131	0.053712	0.00754995	0.0571636	0.00825947	0.586213
84	0.765186	0.1545	31.8203	922277751	11797421	0.0777222	0.0126301	0.0478815	0.00570252	0.0562726	0.00739415	0.0623548	0.00864285	0.066699	0.00953538	0.594671
85	0.760082	0.14296	25.8287	908499592	13778159	0.0915004	0.0149393	0.0540858	0.00620437	0.0645564	0.00828384	0.0721933	0.0098385	0.0776555	0.0109565	0.602923
86	0.754161	0.130743	20.5892	892458857	16040735	0.107541	0.0176563	0.0607618	0.00667599	0.0737666	0.00921019	0.0833311	0.0111377	0.090187	0.0125314	0.611417
87	0.747288	0.117996	16.0994	873834879	18623978	0.126165	0.0208682	0.0678619	0.00710011	0.0839259	0.0101593	0.0958703	0.0125392	0.104456	0.0142692	0.620785
88	0.739326	0.104916	12.2855	852280324	21554555	0.14772	0.0246666	0.0753127	0.00745076	0.0950303	0.0111044	0.109897	0.0140272	0.120622	0.0161654	0.631213
89	0.730146	0.0917503	9.10693	827424044	24856280	0.172576	0.0291644	0.0830131	0.00770035	0.107045	0.0120148	0.125476	0.0155789	0.138831	0.0182098	0.642996
90	0.719673	0.0787996	6.52781	798919161	28504883	0.201081	0.0344502	0.0908235	0.00781048	0.119881	0.0128359	0.142614	0.017138	0.159186	0.0203543	0.65556
91	0.70791	0.0663654	4.50836	766395841	32523320	0.233604	0.0407092	0.0985896	0.00776608	0.133417	0.0135359	0.161288	0.0186741	0.181768	0.0225822	0.669992
92	0.694965	0.0547325	3.00119	729511004	36884837	0.270489	0.0481277	0.10614	0.00755014	0.147479	0.0140618	0.181409	0.0201205	0.206602	0.024834	0.686657
93	0.681025	0.0441596	1.936	688091796	41419208	0.311908	0.0567767	0.113277	0.00713736	0.161796	0.0143174	0.202747	0.0213381	0.233557	0.0269546	0.704091
94	0.665995	0.0348038	1.23541	642195787	45896009	0.357804	0.0667004	0.119804	0.00652687	0.176014	0.0142184	0.224932	0.0221848	0.262322	0.0287658	0.721097
95	0.649854	0.0267662	0.777731	592145077	50050710	0.407855	0.0779368	0.125553	0.00574907	0.189728	0.0137141	0.24747	0.0225381	0.292414	0.030092	0.736991
96	0.63258	0.0200587	0.482812	538444534	53700543	0.461555	0.0906882	0.13042	0.00486742	0.202551	0.0128229	0.26982	0.0223496	0.323248	0.0308335	0.752897
97	0.614224	0.0146393	0.294997	481977189	56467345	0.518023	0.104871	0.134364	0.00394368	0.21411	0.0115586	0.291347	0.0215273	0.354051	0.0308027	0.767517
98	0.59483	0.010396	0.177388	423824566	58152623	0.576175	0.120654	0.137419	0.00305534	0.224131	0.0100209	0.311449	0.0201016	0.384009	0.0299588	0.781939
99	0.574513	0.00718107	0.104824	365334308	58490258	0.634666	0.138006	0.139677	0.00225743	0.232449	0.0083179	0.329569	0.01812	0.412282	0.0282724	0.795877
100	0.553385	0.00482502	0.0609247	308047532	57286776	0.691952	0.156806	0.141265	0.0015877	0.239029	0.00658025	0.345265	0.0156969	0.438078	0.0257965	0.808931
101	0.531613	0.00315383	0.0347887	253487263	54560269	0.746513	0.177116	0.142327	0.00106229	0.243974	0.00494534	0.358294	0.0130282	0.460786	0.0227074	0.821928
102	0.509368	0.00200694	0.0195392	203141577	50345686	0.796858	0.198612	0.143	0.00067287	0.24749	0.00351614	0.368599	0.0103055	0.479979	0.0191935	0.833996
103	0.486845	0.0012444	0.0107938	158197539	44944038	0.841802	0.221245	0.143402	0.0004018	0.249852	0.00236136	0.376344	0.00774476	0.495515	0.0155358	0.84581
104	0.464291	0.000753275	0.00587225	119527438	38670101	0.880473	0.244442	0.143626	0.000224867	0.251344	0.00149247	0.381843	0.00549928	0.507495	0.0119798	0.856151
105	0.441921	0.000445914	0.00315082	87476590	32050848	0.912523	0.268146	0.143744	0.000117627	0.252233	0.000888289	0.385525	0.00368152	0.516277	0.00878209	0.865956
106	0.419924	0.000258644	0.00166966	61928069	25548521	0.938072	0.292061	0.143801	5.72287e-05	0.25273	0.00049743	0.38784	0.00231572	0.522378	0.0061006	0.87524
107	0.39847	0.000147326	0.000875251	42367902	19560167	0.957632	0.315853	0.143827	2.57216e-05	0.252991	0.000261422	0.389206	0.00136608	0.526381	0.00400387	0.88393
108	0.377791	8.26703e-05	0.000454734	28009147	14358755	0.971991	0.338906	0.143838	1.06973e-05	0.25312	0.000128367	0.389961	0.000754409	0.528856	0.0024743	0.89121
109	0.35803	4.58347e-05	0.000234681	17893747	10115400	0.982106	0.361146	0.143842	4.04616e-06	0.253179	5.88211e-05	0.390351	0.000390404	0.530294	0.00143851	0.897728
110	0.339174	2.51621e-05	0.000120772	11052506	6841241	0.988947	0.382326	0.143843	1.40245e-06	0.253204	2.51074e-05	0.390541	0.000189605	0.53108	0.000785819	0.903503
111	0.321242	1.36729e-05	6.18509e-05	6586127	4466379	0.993414	0.404106	0.143844	4.46638e-07	0.253214	1.00047e-05	0.390628	8.69604e-05	0.531485	0.000404833	0.912762
112	0.304282	7.37501e-06	3.15715e-05	3790181	2795946	0.99621	0.424521	0.143844	1.25818e-07	0.253217	3.67667e-06	0.390665	3.73678e-05	0.53168	0.000195269	0.921093
113	0.288628	3.96895e-06	1.61019e-05	2113286	1676895	0.997887	0.442431	0.143844	3.35379e-08	0.253219	1.24929e-06	0.39068	1.49914e-05	0.531768	8.81041e-05	0.926406
114	0.274312	2.14252e-06	8.25268e-06	1147155	966131	0.998853	0.45717	0.143844	4.83066e-09	0.253219	3.86452e-07	0.390686	5.61805e-06	0.531806	3.72878e-05	0.927732
115	0.260801	1.15766e-06	4.27008e-06	606124	541031	0.999394	0.471629	0.143844	0	0.253219	1.10911e-07	0.390688	1.98558e-06	0.531821	1.49947e-05	0.931112
116	0.248774	6.38002e-07	2.23179e-06	317727	288397	0.999682	0.475805	0.143844	0	0.253219	2.88397e-08	0.390688	6.46009e-07	0.531826	5.61509e-06	0.917043
117	0.237189	3.47557e-07	1.18004e-06	159844	157883	0.99984	0.496914	0.143844	0	0.253219	7.10474e-09	0.390689	2.07616e-07	0.531828	2.11011e-06	0.937872
118	0.226038	1.87219e-07	6.20543e-07	77322	82522	0.999923	0.516266	0.143844	0	0.253219	1.65044e-09	0.390689	6.14789e-08	0.531829	7.37747e-07	0.95682
119	0.213933	9.99994e-08	3.24727e-07	36153	41169	0.999964	0.532436	0.143844	0	0.253219	2.05845e-10	0.390689	1.64676e-08	0.531829	2.39398e-07	0.971344
120	0.204045	5.36994e-08	1.66495e-07	16288	19865	0.999984	0.54947	0.143844	0	0.253219	0	0.390689	4.07233e-09	0.531829	7.29045e-08	0.988841
