# Supplementary material for: Quantifying the Potential for Future Gene Therapy to Lower Lifetime Risk of Polygenic Late-Onset Diseases
Source: MDPI journal article supplement (doi:10.3390/ijms20133352), 2019-07-08
Supplement: s2 [file s2 › SuppFiles/Results/LODsCommonLow/Alzheimers/0.250/IndividualsByBetaDistrib.csv]

nEntry	Beta	nDetrimentalCount	nFractionPopulation	nCumulativeFractionPopulation	nEditsNeeded	nIndividuals
0	-19.8	1856.3	2.4e-08	1	0	24
1	-19.6	1865.5	8e-09	0.99999998	0	8
2	-19.4	1869.9	8e-09	0.99999997	0	8
3	-19.2	1865.2	1.7e-08	0.99999996	0	17
4	-19	1866.5	1.6e-08	0.99999994	0	16
5	-18.8	1870.3	3e-08	0.99999993	0	30
6	-18.6	1872.2	3.4e-08	0.9999999	0	34
7	-18.4	1872.9	4.2e-08	0.99999986	0	42
8	-18.2	1875.5	5.2e-08	0.99999982	0	52
9	-18	1877.9	9e-08	0.99999977	0	90
10	-17.8	1878.4	1.03e-07	0.99999968	0	103
11	-17.6	1881.3	1.32e-07	0.99999958	0	132
12	-17.4	1883.9	1.98e-07	0.99999944	0	198
13	-17.2	1884.7	2.3e-07	0.99999925	0	230
14	-17	1887.4	3.17e-07	0.99999902	0	317
15	-16.8	1889.4	4.17e-07	0.9999987	0	417
16	-16.6	1891.5	5.59e-07	0.99999828	0	559
17	-16.4	1893.8	6.91e-07	0.99999772	0	691
18	-16.2	1895.3	9.5e-07	0.99999703	0	950
19	-16	1897.2	1.169e-06	0.99999608	0	1169
20	-15.8	1898.7	1.508e-06	0.99999491	0	1508
21	-15.6	1901.2	1.9e-06	0.99999341	0	1900
22	-15.4	1902.5	2.431e-06	0.99999151	0	2431
23	-15.2	1904.4	3.073e-06	0.99998907	0	3073
24	-15	1906.4	3.91e-06	0.999986	0	3910
25	-14.8	1908.7	5.114e-06	0.99998209	0	5114
26	-14.6	1910.6	6.241e-06	0.99997698	0	6241
27	-14.4	1912.2	7.868e-06	0.99997074	0	7868
28	-14.2	1914.2	9.636e-06	0.99996287	0	9636
29	-14	1916.2	1.2093e-05	0.99995323	0	12093
30	-13.8	1918	1.4981e-05	0.99994114	0	14981
31	-13.6	1919.9	1.8792e-05	0.99992616	0	18792
32	-13.4	1921.7	2.2942e-05	0.99990737	0	22942
33	-13.2	1923.7	2.8306e-05	0.99988442	0	28306
34	-13	1925.6	3.4691e-05	0.99985612	0	34691
35	-12.8	1927.5	4.242e-05	0.99982143	0	42420
36	-12.6	1929.4	5.1743e-05	0.99977901	0	51743
37	-12.4	1931.2	6.2319e-05	0.99972726	0	62319
38	-12.2	1933.1	7.6322e-05	0.99966495	0	76322
39	-12	1935	9.1102e-05	0.99958862	0	91102
40	-11.8	1937	0.000110584	0.99949752	0	110584
41	-11.6	1938.9	0.000132081	0.99938694	0	132081
42	-11.4	1940.8	0.000157183	0.99925486	0	157183
43	-11.2	1942.7	0.000187436	0.99909767	0	187436
44	-11	1944.5	0.000223281	0.99891024	0	223281
45	-10.8	1946.4	0.000263987	0.99868696	0	263987
46	-10.6	1948.4	0.000311373	0.99842297	0	311373
47	-10.4	1950.3	0.000365205	0.9981116	0	365205
48	-10.2	1952.1	0.000429882	0.99774639	0	429882
49	-10	1954	0.000502087	0.99731651	0	502087
50	-9.8	1955.9	0.000585056	0.99681442	0	585056
51	-9.6	1957.8	0.000677376	0.99622937	0	677376
52	-9.4	1959.7	0.000783983	0.99555199	0	783983
53	-9.2	1961.6	0.000904718	0.99476801	0	904718
54	-9	1963.5	0.001039353	0.99386329	0	1039353
55	-8.8	1965.4	0.001193088	0.99282394	0	1193088
56	-8.6	1967.3	0.001363473	0.99163085	0	1363473
57	-8.4	1969.2	0.001552917	0.99026737	0	1552917
58	-8.2	1971.1	0.001764652	0.98871446	0	1764652
59	-8	1973	0.001995489	0.98694981	0	1995489
60	-7.8	1974.9	0.002256564	0.98495432	0	2256564
61	-7.6	1976.8	0.002534951	0.98269775	0	2534951
62	-7.4	1978.7	0.002842065	0.9801628	0	2842065
63	-7.2	1980.6	0.003179285	0.97732074	0	3179285
64	-7	1982.5	0.003542674	0.97414145	0	3542674
65	-6.8	1984.4	0.003935741	0.97059878	0	3935741
66	-6.6	1986.2	0.004357681	0.96666304	0	4357681
67	-6.4	1988.1	0.004814029	0.96230536	0	4814029
68	-6.2	1990	0.005299054	0.95749133	0	5299054
69	-6	1991.9	0.005815214	0.95219227	0	5815214
70	-5.8	1993.8	0.006353269	0.94637706	0	6353269
71	-5.6	1995.7	0.006931302	0.94002379	0	6931302
72	-5.4	1997.6	0.007532769	0.93309249	0	7532769
73	-5.2	1999.5	0.008162749	0.92555972	0	8162749
74	-5	2001.4	0.008814828	0.91739697	0	8814828
75	-4.8	2003.3	0.009493164	0.90858214	0	9493164
76	-4.6	2005.2	0.010191466	0.89908898	0	10191466
77	-4.4	2007.1	0.010905962	0.88889751	0	10905962
78	-4.2	2009	0.011636817	0.87799155	0	11636817
79	-4	2010.9	0.01236857	0.86635473	0	12368570
80	-3.8	2012.8	0.013108981	0.85398616	0	13108981
81	-3.6	2014.7	0.013856268	0.84087718	0	13856268
82	-3.4	2016.5	0.014606275	0.82702091	0	14606275
83	-3.2	2018.4	0.015339164	0.81241464	0	15339164
84	-3	2020.3	0.016065101	0.79707547	0	16065101
85	-2.8	2022.2	0.016772296	0.78101037	0	16772296
86	-2.6	2024.1	0.0174492	0.76423808	0	17449200
87	-2.4	2026	0.01810167	0.74678888	0	18101670
88	-2.2	2027.9	0.018718023	0.72868721	0	18718023
89	-2	2029.8	0.019299284	0.70996918	0	19299284
90	-1.8	2031.7	0.019827826	0.6906699	0	19827826
91	-1.6	2033.6	0.020325621	0.67084208	0	20325621
92	-1.4	2035.5	0.020760642	0.65051645	0	20760642
93	-1.2	2037.4	0.021143714	0.62975581	0	21143714
94	-1	2039.3	0.021461916	0.6086121	0	21461916
95	-0.8	2041.2	0.021727883	0.58715018	0	21727883
96	-0.6	2043	0.021913891	0.5654223	0	21913891
97	-0.4	2044.9	0.022047019	0.54350841	0	22047019
98	-0.2	2046.8	0.022120484	0.52146139	0	22120484
99	0	2048.7	0.02210732	0.49934091	0	22107320
100	0.2	2050.6	0.02203197	0.47723359	1.8855	22031970
101	0.4	2052.5	0.021892711	0.45520162	3.7814	21892711
102	0.6	2054.4	0.021679861	0.4333089	5.6702	21679861
103	0.8	2056.3	0.021407476	0.41162904	7.5623	21407476
104	1	2058.2	0.021088056	0.39022157	9.4504	21088056
105	1.2	2060.1	0.020689519	0.36913351	11.348	20689519
106	1.4	2062	0.020250927	0.34844399	13.231	20250927
107	1.6	2063.9	0.019747503	0.32819307	15.129	19747503
108	1.8	2065.7	0.019204804	0.30844556	17.019	19204804
109	2	2067.6	0.018618644	0.28924076	18.906	18618644
110	2.2	2069.5	0.017999611	0.27062211	20.798	17999611
111	2.4	2071.4	0.017343235	0.2526225	22.694	17343235
112	2.6	2073.3	0.016666796	0.23527927	24.581	16666796
113	2.8	2075.2	0.015953954	0.21861247	26.469	15953954
114	3	2077.1	0.015240764	0.20265852	28.362	15240764
115	3.2	2079	0.014509913	0.18741775	30.244	14509913
116	3.4	2080.9	0.013767542	0.17290784	32.137	13767542
117	3.6	2082.8	0.013033375	0.1591403	34.036	13033375
118	3.8	2084.6	0.012290896	0.14610692	35.919	12290896
119	4	2086.5	0.011562601	0.13381603	37.811	11562601
120	4.2	2088.4	0.010832199	0.12225343	39.701	10832199
121	4.4	2090.3	0.010132176	0.11142123	41.582	10132176
122	4.6	2092.2	0.009437544	0.10128905	43.474	9437544
123	4.8	2094.1	0.008764897	0.091851508	45.368	8764897
124	5	2096	0.008119406	0.083086611	47.264	8119406
125	5.2	2097.9	0.007504516	0.074967205	49.15	7504516
126	5.4	2099.8	0.006906424	0.067462689	51.036	6906424
127	5.6	2101.7	0.006338835	0.060556265	52.934	6338835
128	5.8	2103.5	0.005804912	0.05421743	54.816	5804912
129	6	2105.4	0.005290412	0.048412518	56.703	5290412
130	6.2	2107.3	0.004817803	0.043122106	58.593	4817803
131	6.4	2109.2	0.004365004	0.038304303	60.487	4365004
132	6.6	2111.1	0.003944405	0.033939299	62.377	3944405
133	6.8	2113	0.003559769	0.029994894	64.264	3559769
134	7	2114.9	0.003195777	0.026435125	66.16	3195777
135	7.2	2116.8	0.002867481	0.023239348	68.042	2867481
136	7.4	2118.6	0.002560215	0.020371867	69.926	2560215
137	7.6	2120.5	0.002279947	0.017811652	71.813	2279947
138	7.8	2122.4	0.002026082	0.015531705	73.702	2026082
139	8	2124.3	0.001794476	0.013505623	75.596	1794476
140	8.2	2126.2	0.001583224	0.011711147	77.504	1583224
141	8.4	2128.1	0.001391389	0.010127923	79.385	1391389
142	8.6	2130	0.001219201	0.008736534	81.276	1219201
143	8.8	2131.9	0.00106902	0.007517333	83.163	1069020
144	9	2133.8	0.000930507	0.006448313	85.053	930507
145	9.2	2135.6	0.000809695	0.005517806	86.902	809695
146	9.4	2137.5	0.000700791	0.004708111	88.795	700791
147	9.6	2139.4	0.000605	0.00400732	90.706	605000
148	9.8	2141.3	0.000521992	0.00340232	92.594	521992
149	10	2143.2	0.000450364	0.002880328	94.451	450364
150	10.2	2145.1	0.000384567	0.002429964	96.357	384567
151	10.4	2147	0.000329336	0.002045397	98.251	329336
152	10.6	2148.9	0.000280607	0.001716061	100.17	280607
153	10.8	2150.8	0.000238082	0.001435454	102.06	238082
154	11	2152.6	0.000201108	0.001197372	103.9	201108
155	11.2	2154.5	0.000169629	0.000996264	105.83	169629
156	11.4	2156.4	0.000143273	0.000826635	107.68	143273
157	11.6	2158.3	0.000119258	0.000683362	109.55	119258
158	11.8	2160.2	9.9981e-05	0.000564104	111.51	99981
159	12	2162	8.2746e-05	0.000464123	113.26	82746
160	12.2	2163.9	6.9023e-05	0.000381377	115.22	69023
161	12.4	2165.9	5.7177e-05	0.000312354	117.2	57177
162	12.6	2167.7	4.732e-05	0.000255177	118.98	47320
163	12.8	2169.7	3.9323e-05	0.000207857	120.97	39323
164	13	2171.5	3.2141e-05	0.000168534	122.81	32141
165	13.2	2173.5	2.642e-05	0.000136393	124.79	26420
166	13.4	2175.3	2.1312e-05	0.000109973	126.62	21312
167	13.6	2177.3	1.7479e-05	8.8661e-05	128.58	17479
168	13.8	2179	1.4163e-05	7.1182e-05	130.25	14163
169	14	2180.9	1.1447e-05	5.7019e-05	132.21	11447
170	14.2	2182.9	9.178e-06	4.5572e-05	134.17	9178
171	14.4	2184.5	7.668e-06	3.6394e-05	135.79	7668
172	14.6	2186.6	6.02e-06	2.8726e-05	137.92	6020
173	14.8	2188.1	4.807e-06	2.2706e-05	139.36	4807
174	15	2190.5	3.797e-06	1.7899e-05	141.74	3797
175	15.2	2192.2	3.028e-06	1.4102e-05	143.43	3028
176	15.4	2194.3	2.383e-06	1.1074e-05	145.57	2383
177	15.6	2196.4	1.901e-06	8.691e-06	147.64	1901
178	15.8	2197.8	1.565e-06	6.79e-06	149.08	1565
179	16	2199.7	1.181e-06	5.225e-06	150.96	1181
180	16.2	2201.9	8.91e-07	4.044e-06	153.19	891
181	16.4	2203.6	6.95e-07	3.153e-06	154.92	695
182	16.6	2205.2	5.55e-07	2.458e-06	156.52	555
183	16.8	2207.3	4.57e-07	1.903e-06	158.56	457
184	17	2208.8	3.07e-07	1.446e-06	160.06	307
185	17.2	2211	2.71e-07	1.139e-06	162.32	271
186	17.4	2211.5	1.91e-07	8.68e-07	162.73	191
187	17.6	2214.8	1.61e-07	6.77e-07	166.09	161
188	17.8	2217.4	1.39e-07	5.16e-07	168.67	139
189	18	2219.6	9.9e-08	3.77e-07	170.87	99
190	18.2	2222.5	7.2e-08	2.78e-07	173.74	72
191	18.4	2222.3	4.6e-08	2.06e-07	173.56	46
192	18.6	2223.6	4.1e-08	1.6e-07	174.86	41
193	18.8	2227.8	3.5e-08	1.19e-07	179.05	35
194	19	2230	2.1e-08	8.4e-08	181.28	21
195	19.2	2227.5	2.3e-08	6.3e-08	178.76	23
196	19.4	2231.8	1.5e-08	4e-08	183.08	15
197	19.6	2229.4	5e-09	2.5e-08	180.68	5
198	19.8	2232.8	4e-09	2e-08	184.03	4
199	20	2243.9	1.6e-08	1.6e-08	195.15	16
