# Supplementary material for: Quantifying the Potential for Future Gene Therapy to Lower Lifetime Risk of Polygenic Late-Onset Diseases
Source: MDPI journal article supplement (doi:10.3390/ijms20133352), 2019-07-08
Supplement: s2 [file s2 › SuppFiles/Results/LODsCommonLow/Alzheimers/1.000/FrailtyAnalysis.csv]

Age	Heritability	MeanOR	CaseOR	nControls	nCases	nCumIncidence	nIncidence	nLifeIncidence0	nAbsIncidence0	nLifeIncidence5	nAbsIncidence5	nLifeIncidence10	nAbsIncidence10	nLifeIncidence15	nAbsIncidence15	nIncActDivExp
38	0.798176	1.0001	37616.7	999997916	2084	2.084e-06	2.084e-06	2.0266e-06	2.0266e-06	2.0395e-06	2.0395e-06	2.05023e-06	2.05023e-06	2.05959e-06	2.05959e-06	1.01181
39	0.798171	1.00005	24284.8	999993442	4474	6.558e-06	4.47401e-06	6.37098e-06	4.34439e-06	6.41288e-06	4.37338e-06	6.44741e-06	4.39718e-06	6.47741e-06	4.41783e-06	0.999419
40	0.798163	0.99998	18531.4	999986133	7309	1.3867e-05	7.30905e-06	1.34573e-05	7.08629e-06	1.35488e-05	7.13596e-06	1.36236e-05	7.17623e-06	1.36882e-05	7.2108e-06	0.999418
41	0.798151	0.999877	14919.5	999975415	10718	2.4585e-05	1.07181e-05	2.38318e-05	1.03745e-05	2.39999e-05	1.04511e-05	2.41359e-05	1.05123e-05	2.42526e-05	1.05644e-05	1.00709
42	0.798136	0.999737	13182.2	999960635	14780	3.9365e-05	1.47804e-05	3.81135e-05	1.42817e-05	3.83928e-05	1.43929e-05	3.86165e-05	1.44806e-05	3.88071e-05	1.45545e-05	1.01582
43	0.798118	0.99956	10267.2	999941422	19213	5.8578e-05	1.92138e-05	5.66445e-05	1.85309e-05	5.70766e-05	1.86838e-05	5.74192e-05	1.88027e-05	5.77088e-05	1.89017e-05	1.00404
44	0.798095	0.999336	8989.18	999916800	24622	8.32e-05	2.46234e-05	8.03453e-05	2.37009e-05	8.09853e-05	2.39087e-05	8.14874e-05	2.40683e-05	8.1908e-05	2.41992e-05	1.00425
45	0.798067	0.999057	7961.21	999885745	31055	0.000114255	3.10576e-05	0.000110174	2.98289e-05	0.000111094	3.01088e-05	0.000111807	3.03198e-05	0.000112399	3.04909e-05	1.00716
46	0.798034	0.998723	6811.56	999847860	37885	0.00015214	3.78893e-05	0.000146478	3.63041e-05	0.000147765	3.6671e-05	0.000148749	3.69415e-05	0.000149557	3.71578e-05	0.990538
47	0.797994	0.998312	6167.24	999800790	47070	0.00019921	4.70772e-05	0.000191469	4.49907e-05	0.000193248	4.5483e-05	0.000194586	4.58372e-05	0.000195673	4.61164e-05	1.00263
48	0.797947	0.997822	5409.75	999743617	57173	0.000256383	5.71844e-05	0.000245964	5.4495e-05	0.000248391	5.51434e-05	0.000250184	5.55982e-05	0.000251625	5.59521e-05	1.00031
49	0.797892	0.997234	4758.12	999674025	69592	0.000325975	6.96098e-05	0.000312093	6.61291e-05	0.00031538	6.69886e-05	0.00031776	6.75759e-05	0.000319652	6.80269e-05	1.0066
50	0.797828	0.99654	4268.23	999590868	83157	0.000409132	8.31841e-05	0.000390846	7.8753e-05	0.000395254	7.9874e-05	0.000398383	8.06232e-05	0.00040084	8.11883e-05	0.999546
51	0.797754	0.995722	3798.49	999491277	99591	0.000508723	9.96318e-05	0.000484814	9.39676e-05	0.000490689	9.54351e-05	0.000494783	9.63996e-05	0.000497951	9.71107e-05	0.998988
52	0.797668	0.994756	3365.59	999371947	119330	0.000628053	0.000119391	0.000596946	0.000112133	0.000604748	0.000114059	0.00061009	0.000115307	0.000614156	0.000116205	1.00236
53	0.797569	0.993626	2994.86	999230157	141790	0.000769843	0.000141879	0.000729589	0.000132643	0.000739896	0.000135149	0.000746846	0.000136756	0.00075204	0.000137884	1.00019
54	0.797455	0.9923	2674.49	999061200	168957	0.0009388	0.000169087	0.000886877	0.000157287	0.000900446	0.00016055	0.000909482	0.000162636	0.000916102	0.000164062	1.00324
55	0.797324	0.990757	2380.68	998861546	199654	0.00113845	0.000199842	0.00107175	0.000184877	0.00108953	0.00018908	0.00110125	0.000191772	0.00110967	0.000193571	0.999894
56	0.797174	0.988958	2120.42	998624896	236650	0.0013751	0.00023692	0.00128962	0.000217871	0.00131281	0.000223288	0.00132803	0.000226775	0.00133874	0.000229067	1.00126
57	0.797004	0.986872	1887.49	998345824	279072	0.00165418	0.000279456	0.00154494	0.00025532	0.00157505	0.00026224	0.00159477	0.000266744	0.0016084	0.000269663	0.998924
58	0.796808	0.984443	1688.34	998015457	330367	0.00198454	0.000330914	0.00184515	0.000300201	0.00188411	0.000309055	0.00190967	0.000314893	0.00192704	0.000318639	1.00162
59	0.796585	0.981631	1507.07	997626322	389135	0.00237368	0.000389909	0.00219616	0.000351017	0.00224637	0.000362257	0.00227944	0.000369772	0.00230162	0.000374577	1.00033
60	0.79633	0.978378	1343.41	997167898	458424	0.0028321	0.000459515	0.00260645	0.000410285	0.00267086	0.000424494	0.00271358	0.000434146	0.00274194	0.000440325	1.00006
61	0.796041	0.974611	1195.93	996627038	540860	0.00337296	0.000542396	0.00308646	0.000480016	0.0031688	0.00049794	0.0032239	0.00051032	0.00326023	0.00051829	1.00207
62	0.795711	0.970263	1065.61	995990635	636403	0.00400936	0.000638557	0.00364622	0.000559758	0.00375104	0.000582239	0.00382192	0.000598018	0.00386852	0.00060829	1.00206
63	0.795337	0.965255	950.897	995242834	747801	0.00475717	0.000750811	0.00429764	0.000651417	0.00443056	0.000679519	0.00452148	0.00069956	0.0045813	0.000712774	1.00129
64	0.794912	0.959501	846.35	994365535	877299	0.00563446	0.000881492	0.00505399	0.000756355	0.00522192	0.000791363	0.00533819	0.000816704	0.00541494	0.000833645	0.999482
65	0.794431	0.952885	748.904	993333457	1032078	0.00666654	0.00103793	0.00593398	0.000879986	0.00614562	0.000923699	0.00629387	0.000955689	0.00639236	0.000977419	1.00097
66	0.793884	0.945301	668.919	992123856	1209601	0.00787614	0.00121772	0.00695315	0.00101917	0.00721915	0.00107353	0.00740749	0.00111361	0.00753366	0.0011413	0.999185
67	0.793264	0.936609	594.88	990703853	1420003	0.00929615	0.00143128	0.0081344	0.00118125	0.00846813	0.00124898	0.00870663	0.00129915	0.00886802	0.00133436	0.999539
68	0.79256	0.926662	526.949	989036347	1667506	0.0109637	0.00168315	0.00950252	0.00136811	0.00992071	0.00145258	0.0102219	0.00151525	0.010428	0.00155994	1.00068
69	0.791764	0.915331	466.174	987084057	1952290	0.0129159	0.00197393	0.0110805	0.00157796	0.0116039	0.00168315	0.0119829	0.00176105	0.0122454	0.00181745	0.999339
70	0.790862	0.902435	411.72	984796564	2287493	0.0152034	0.00231742	0.0128995	0.00181904	0.0135543	0.0019504	0.0140302	0.00204728	0.0143636	0.00211818	0.999304
71	0.78984	0.887793	362.826	982117566	2678998	0.0178824	0.00272036	0.0149924	0.0020929	0.0158115	0.00225724	0.0164078	0.00237762	0.01683	0.00246641	0.999377
72	0.788679	0.871197	319.802	978979289	3138277	0.0210207	0.00319542	0.0173969	0.00240447	0.0184221	0.00261062	0.0191682	0.00276032	0.0197012	0.00287118	1.00033
73	0.787365	0.852491	280.504	975313337	3665952	0.0246867	0.00374467	0.0201463	0.00274937	0.0214299	0.00300775	0.0223616	0.00319345	0.0230324	0.00333121	0.999166
74	0.785874	0.831461	245.302	971029447	4283890	0.0289706	0.00439232	0.0232847	0.0031384	0.0248924	0.0034625	0.0260549	0.00369331	0.0268966	0.00386426	0.999157
75	0.78418	0.807886	214.402	966025175	5004272	0.0339748	0.00515357	0.026858	0.00357338	0.0288718	0.00397945	0.0303217	0.00426682	0.0313754	0.00447877	0.99971
76	0.782251	0.781596	186.688	960188976	5836199	0.039811	0.00604146	0.0309103	0.00405231	0.0334312	0.00455938	0.0352391	0.00491741	0.0365551	0.00517966	0.999662
77	0.780057	0.752434	161.214	953386179	6802797	0.0466138	0.00708485	0.0354906	0.00458022	0.0386433	0.00521213	0.0408982	0.00565901	0.0425386	0.0059835	1.00028
78	0.777553	0.720281	139.079	945475447	7910732	0.0545246	0.00829751	0.0406387	0.00514811	0.0445762	0.00593285	0.0473886	0.0064904	0.0494297	0.00689112	0.99992
79	0.774693	0.685085	119.052	936291686	9183761	0.0637083	0.00971338	0.0463947	0.00575601	0.0513043	0.00672807	0.0548114	0.00742287	0.0573474	0.00791769	0.999498
80	0.771416	0.646837	101.34	925649376	10642310	0.0743506	0.0113664	0.0527932	0.00639848	0.0589036	0.0075993	0.0632743	0.00846287	0.0664214	0.00907401	0.999128
81	0.767656	0.605647	85.4022	913342244	12307132	0.0866578	0.0132957	0.0598596	0.00706645	0.0674489	0.00854533	0.0728889	0.00961464	0.076791	0.0103696	0.998871
82	0.763314	0.561647	71.5115	899129193	14213051	0.100871	0.0155616	0.0676127	0.00775315	0.0770183	0.00956943	0.0837786	0.0108897	0.0886143	0.0118233	0.999785
83	0.758294	0.515238	59.0766	882776348	16352845	0.117224	0.0181874	0.0760373	0.00842458	0.0876603	0.010642	0.0960428	0.0122642	0.102031	0.0134168	0.999923
84	0.752469	0.466926	48.1933	864031319	18745029	0.135969	0.0212342	0.0850981	0.00906078	0.099409	0.0117486	0.109776	0.0137327	0.117182	0.0151509	0.999785
85	0.745684	0.417384	38.7179	842637768	21393551	0.157362	0.0247602	0.0947317	0.00963362	0.112271	0.0128624	0.125052	0.0152764	0.134194	0.0170124	0.999277
86	0.737769	0.367439	30.49	818332813	24304955	0.181667	0.0288439	0.104847	0.0101155	0.126227	0.0139553	0.141928	0.0168759	0.153182	0.0189876	0.998831
87	0.728519	0.31801	23.4593	790843931	27488882	0.209156	0.0335913	0.115327	0.0104797	0.141222	0.014995	0.160436	0.0185079	0.174243	0.0210613	0.999273
88	0.717734	0.270164	17.5572	759951918	30892013	0.240048	0.0390621	0.126005	0.0106784	0.157137	0.0159148	0.180539	0.0201037	0.197412	0.0231682	0.99959
89	0.705268	0.225016	12.6955	725493898	34458020	0.274506	0.0453424	0.13668	0.0106749	0.173793	0.016656	0.202136	0.0215969	0.222656	0.0252441	0.999676
90	0.691118	0.183614	8.81948	687394078	38099820	0.312606	0.0525157	0.14712	0.0104395	0.190949	0.0171565	0.225043	0.0229068	0.249861	0.0272057	0.999334
91	0.675524	0.14678	5.87127	645671187	41722891	0.354329	0.0606972	0.157083	0.0099628	0.208314	0.0173647	0.248999	0.0239562	0.278831	0.0289699	0.998955
92	0.659023	0.114979	3.75354	600440251	45230936	0.39956	0.0700526	0.166341	0.00925855	0.225557	0.0172436	0.273673	0.0246732	0.309285	0.0304533	0.999469
93	0.642191	0.0883135	2.33378	552055209	48385042	0.447945	0.0805826	0.174679	0.00833771	0.242283	0.0167253	0.298599	0.0249268	0.340772	0.0314878	0.99931
94	0.624679	0.0663672	1.4554	500978374	51076835	0.499022	0.0925212	0.181943	0.00726364	0.258106	0.0158233	0.323288	0.024689	0.372785	0.0320129	1.00025
95	0.60644	0.0487582	0.901012	448017973	52960401	0.551982	0.105714	0.188026	0.0060833	0.272617	0.0145114	0.347137	0.0238483	0.404627	0.0318414	0.999658
96	0.587437	0.0349696	0.552189	394050422	53967551	0.60595	0.120458	0.192917	0.00489162	0.285504	0.0128866	0.369597	0.0224608	0.435613	0.0309868	1.00005
97	0.567732	0.0244716	0.333813	340219869	53830553	0.65978	0.136608	0.196677	0.00375953	0.296523	0.0110188	0.39012	0.0205221	0.464978	0.0293643	0.999789
98	0.547377	0.0166968	0.198908	287724456	52495413	0.712276	0.154298	0.199435	0.00275811	0.305569	0.00904601	0.408266	0.0181461	0.492022	0.0270443	0.999981
99	0.526508	0.0111087	0.116636	237861408	49863048	0.762139	0.173301	0.20136	0.00192446	0.31266	0.00709102	0.423713	0.0154473	0.516124	0.0241023	0.999426
100	0.505237	0.00720558	0.0673039	191779396	46082012	0.808221	0.193735	0.202637	0.00127716	0.317953	0.00529321	0.43634	0.0126267	0.536875	0.020751	0.999437
101	0.483718	0.00455759	0.0382105	150465335	41314061	0.849535	0.215425	0.203441	0.000804385	0.321698	0.00374471	0.446205	0.00986518	0.55407	0.0171945	0.999703
102	0.462078	0.00281302	0.0213472	114640499	35824836	0.88536	0.238094	0.20392	0.000478799	0.3242	0.00250201	0.453538	0.00733316	0.567728	0.0136577	0.999783
103	0.4405	0.00169588	0.0117356	84649808	29990691	0.91535	0.261606	0.204188	0.000268117	0.325776	0.00157571	0.458706	0.005168	0.578094	0.0103669	1.00011
104	0.41921	0.0010003	0.00635309	60476898	24172910	0.939523	0.285564	0.204329	0.000140565	0.326708	0.000932953	0.462144	0.00343763	0.585583	0.00748865	1.00018
105	0.398315	0.000578174	0.00339478	41748221	18728677	0.958252	0.309683	0.204397	6.87342e-05	0.327228	0.000519065	0.464295	0.00215127	0.590715	0.00513175	1.0001
106	0.378029	0.000328288	0.00179144	27823400	13924821	0.972177	0.333543	0.204429	3.11916e-05	0.327499	0.000271116	0.465557	0.00126215	0.59404	0.00332504	0.99955
107	0.358352	0.000183337	0.000936047	17881378	9942022	0.982119	0.357326	0.204442	1.30738e-05	0.327632	0.000132875	0.466251	0.000694351	0.596075	0.00203508	0.999994
108	0.339643	0.000101108	0.000484142	11086588	6794790	0.988913	0.379993	0.204447	5.06212e-06	0.327692	6.07454e-05	0.466608	0.000356998	0.597246	0.00117088	0.999253
109	0.321989	5.52138e-05	0.000249207	6636161	4450427	0.993364	0.401424	0.204448	1.78017e-06	0.327718	2.58792e-05	0.46678	0.000171764	0.597879	0.000632895	0.99785
110	0.305297	2.98864e-05	0.000127899	3834380	2801781	0.996166	0.422199	0.204449	5.74365e-07	0.327728	1.02825e-05	0.466858	7.76514e-05	0.598201	0.000321827	0.997731
111	0.289378	1.6022e-05	6.538e-05	2134475	1699905	0.997866	0.443332	0.204449	1.6999e-07	0.327732	3.80779e-06	0.466891	3.30972e-05	0.598355	0.000154079	1.00136
112	0.274446	8.54281e-06	3.32857e-05	1147505	986970	0.998852	0.462395	0.204449	4.44137e-08	0.327734	1.29787e-06	0.466904	1.31909e-05	0.598424	6.893e-05	1.00327
113	0.260633	4.54336e-06	1.69245e-05	596547	550958	0.999403	0.480136	0.204449	1.10192e-08	0.327734	4.10464e-07	0.466909	4.92556e-06	0.598452	2.89473e-05	1.00536
114	0.248041	2.42948e-06	8.65661e-06	302656	293891	0.999697	0.492654	0.204449	1.46946e-09	0.327734	1.17556e-07	0.466911	1.70898e-06	0.598464	1.13427e-05	0.999738
115	0.236512	1.30252e-06	4.45827e-06	149324	153332	0.999851	0.506621	0.204449	0	0.327734	3.14331e-08	0.466911	5.62728e-07	0.598468	4.2496e-06	1.0002
116	0.225998	7.12198e-07	2.3383e-06	73495	75829	0.999927	0.507815	0.204449	0	0.327734	7.5829e-09	0.466911	1.69857e-07	0.59847	1.47639e-06	0.978738
117	0.215986	3.84433e-07	1.22915e-06	34507	38988	0.999965	0.530485	0.204449	0	0.327734	1.75446e-09	0.466912	5.12692e-08	0.59847	5.21075e-07	1.00123
118	0.205314	2.05581e-07	6.48023e-07	15694	18813	0.999984	0.545194	0.204449	0	0.327734	3.7626e-10	0.466912	1.40157e-08	0.59847	1.68188e-07	1.01043
119	0.197239	1.10048e-07	3.35173e-07	6888	8806	0.999993	0.561106	0.204449	0	0.327734	4.403e-11	0.466912	3.5224e-09	0.59847	5.12069e-08	1.02365
120	0.186777	5.7753e-08	1.75044e-07	2883	4005	0.999997	0.581446	0.204449	0	0.327734	0	0.466912	8.21025e-10	0.59847	1.46983e-08	1.04639
