# Supplementary material for: Quantifying the Potential for Future Gene Therapy to Lower Lifetime Risk of Polygenic Late-Onset Diseases
Source: MDPI journal article supplement (doi:10.3390/ijms20133352), 2019-07-08
Supplement: s2 [file s2 › SuppFiles/Results/LODsCommonLow/Alzheimers/1.000/IndividualsByBetaDistrib.csv]

nEntry	Beta	nDetrimentalCount	nFractionPopulation	nCumulativeFractionPopulation	nEditsNeeded	nIndividuals
0	-19.8	1853.9	2.5e-08	1	0	25
1	-19.6	1862.2	5e-09	0.99999998	0	5
2	-19.4	1863.9	1.2e-08	0.99999997	0	12
3	-19.2	1865.8	1e-08	0.99999996	0	10
4	-19	1864.7	1.4e-08	0.99999995	0	14
5	-18.8	1870.2	3.2e-08	0.99999993	0	32
6	-18.6	1867.7	3.2e-08	0.9999999	0	32
7	-18.4	1874.4	4.8e-08	0.99999987	0	48
8	-18.2	1876.1	7.8e-08	0.99999982	0	78
9	-18	1878.2	8.8e-08	0.99999974	0	88
10	-17.8	1879.1	9.2e-08	0.99999966	0	92
11	-17.6	1881.8	1.6e-07	0.99999956	0	160
12	-17.4	1883.4	2.05e-07	0.9999994	0	205
13	-17.2	1885.9	2.38e-07	0.9999992	0	238
14	-17	1887.5	3.17e-07	0.99999896	0	317
15	-16.8	1889.4	4.25e-07	0.99999864	0	425
16	-16.6	1891.6	5.47e-07	0.99999822	0	547
17	-16.4	1893.4	7.11e-07	0.99999767	0	711
18	-16.2	1895.4	9.81e-07	0.99999696	0	981
19	-16	1897.5	1.129e-06	0.99999598	0	1129
20	-15.8	1898.7	1.535e-06	0.99999485	0	1535
21	-15.6	1900.6	1.985e-06	0.99999332	0	1985
22	-15.4	1902.9	2.346e-06	0.99999133	0	2346
23	-15.2	1904.8	3.058e-06	0.99998898	0	3058
24	-15	1907	3.992e-06	0.99998593	0	3992
25	-14.8	1908.6	5.056e-06	0.99998193	0	5056
26	-14.6	1910.4	6.416e-06	0.99997688	0	6416
27	-14.4	1912.2	7.801e-06	0.99997046	0	7801
28	-14.2	1914.2	9.876e-06	0.99996266	0	9876
29	-14	1916	1.2104e-05	0.99995279	0	12104
30	-13.8	1917.9	1.4921e-05	0.99994068	0	14921
31	-13.6	1919.9	1.8893e-05	0.99992576	0	18893
32	-13.4	1921.8	2.2856e-05	0.99990687	0	22856
33	-13.2	1923.6	2.8322e-05	0.99988401	0	28322
34	-13	1925.5	3.476e-05	0.99985569	0	34760
35	-12.8	1927.5	4.2478e-05	0.99982093	0	42478
36	-12.6	1929.4	5.1842e-05	0.99977845	0	51842
37	-12.4	1931.2	6.2802e-05	0.99972661	0	62802
38	-12.2	1933.1	7.5868e-05	0.99966381	0	75868
39	-12	1935.1	9.1608e-05	0.99958794	0	91608
40	-11.8	1937	0.000110265	0.99949633	0	110265
41	-11.6	1938.9	0.00013185	0.99938607	0	131850
42	-11.4	1940.7	0.000157676	0.99925422	0	157676
43	-11.2	1942.7	0.000187318	0.99909654	0	187318
44	-11	1944.6	0.000222659	0.99890922	0	222659
45	-10.8	1946.5	0.000263465	0.99868656	0	263465
46	-10.6	1948.3	0.00031073	0.9984231	0	310730
47	-10.4	1950.3	0.000365723	0.99811237	0	365723
48	-10.2	1952.1	0.000428295	0.99774665	0	428295
49	-10	1954.1	0.000500085	0.99731835	0	500085
50	-9.8	1955.9	0.000584014	0.99681827	0	584014
51	-9.6	1957.8	0.000678702	0.99623425	0	678702
52	-9.4	1959.7	0.000784955	0.99555555	0	784955
53	-9.2	1961.6	0.000904243	0.99477059	0	904243
54	-9	1963.5	0.001044173	0.99386635	0	1044173
55	-8.8	1965.4	0.00119116	0.99282218	0	1191160
56	-8.6	1967.3	0.001363969	0.99163102	0	1363969
57	-8.4	1969.2	0.0015556	0.99026705	0	1555600
58	-8.2	1971.1	0.001765685	0.98871145	0	1765685
59	-8	1973	0.001996747	0.98694576	0	1996747
60	-7.8	1974.9	0.002250727	0.98494902	0	2250727
61	-7.6	1976.8	0.00253446	0.98269829	0	2534460
62	-7.4	1978.7	0.002839085	0.98016383	0	2839085
63	-7.2	1980.6	0.003182272	0.97732475	0	3182272
64	-7	1982.5	0.003543777	0.97414247	0	3543777
65	-6.8	1984.4	0.003936837	0.9705987	0	3936837
66	-6.6	1986.3	0.004356845	0.96666186	0	4356845
67	-6.4	1988.2	0.004815523	0.96230501	0	4815523
68	-6.2	1990	0.005300812	0.95748949	0	5300812
69	-6	1991.9	0.005810441	0.95218868	0	5810441
70	-5.8	1993.8	0.006353791	0.94637824	0	6353791
71	-5.6	1995.7	0.006933318	0.94002445	0	6933318
72	-5.4	1997.6	0.007533517	0.93309113	0	7533517
73	-5.2	1999.5	0.008158421	0.92555761	0	8158421
74	-5	2001.4	0.008819454	0.91739919	0	8819454
75	-4.8	2003.3	0.009498959	0.90857974	0	9498959
76	-4.6	2005.2	0.010191983	0.89908078	0	10191983
77	-4.4	2007.1	0.0109035	0.8888888	0	10903500
78	-4.2	2009	0.011630613	0.8779853	0	11630613
79	-4	2010.9	0.012377943	0.86635468	0	12377943
80	-3.8	2012.8	0.013112568	0.85397674	0	13112568
81	-3.6	2014.7	0.013864146	0.84086417	0	13864146
82	-3.4	2016.6	0.014608533	0.82700003	0	14608533
83	-3.2	2018.4	0.01534174	0.81239149	0	15341740
84	-3	2020.3	0.016058618	0.79704975	0	16058618
85	-2.8	2022.2	0.016767489	0.78099113	0	16767489
86	-2.6	2024.1	0.017443275	0.76422365	0	17443275
87	-2.4	2026	0.01809202	0.74678037	0	18092020
88	-2.2	2027.9	0.018721166	0.72868835	0	18721166
89	-2	2029.8	0.019295239	0.70996719	0	19295239
90	-1.8	2031.7	0.019841375	0.69067195	0	19841375
91	-1.6	2033.6	0.020323282	0.67083057	0	20323282
92	-1.4	2035.5	0.020764959	0.65050729	0	20764959
93	-1.2	2037.4	0.021146325	0.62974233	0	21146325
94	-1	2039.3	0.021455802	0.608596	0	21455802
95	-0.8	2041.2	0.021725402	0.5871402	0	21725402
96	-0.6	2043	0.021913692	0.5654148	0	21913692
97	-0.4	2044.9	0.022047002	0.54350111	0	22047002
98	-0.2	2046.8	0.022115301	0.52145411	0	22115301
99	0	2048.7	0.022109402	0.49933881	0	22109402
100	0.2	2050.6	0.022030291	0.4772294	1.8955	22030291
101	0.4	2052.5	0.02189122	0.45519911	3.7835	21891220
102	0.6	2054.4	0.021675346	0.43330789	5.6736	21675346
103	0.8	2056.3	0.021418613	0.41163255	7.5667	21418613
104	1	2058.2	0.021079447	0.39021393	9.4635	21079447
105	1.2	2060.1	0.020684399	0.36913449	11.353	20684399
106	1.4	2062	0.020239019	0.34845009	13.242	20239019
107	1.6	2063.8	0.019753532	0.32821107	15.131	19753532
108	1.8	2065.7	0.019208861	0.30845754	17.022	19208861
109	2	2067.6	0.018622619	0.28924868	18.915	18622619
110	2.2	2069.5	0.018002299	0.27062606	20.808	18002299
111	2.4	2071.4	0.01734816	0.25262376	22.698	17348160
112	2.6	2073.3	0.016660347	0.2352756	24.581	16660347
113	2.8	2075.2	0.015960901	0.21861525	26.473	15960901
114	3	2077.1	0.015242472	0.20265435	28.365	15242472
115	3.2	2079	0.01450305	0.18741188	30.255	14503050
116	3.4	2080.9	0.013770385	0.17290883	32.148	13770385
117	3.6	2082.7	0.013022243	0.15913844	34.031	13022243
118	3.8	2084.6	0.012294	0.1461162	35.923	12294000
119	4	2086.5	0.011557397	0.1338222	37.815	11557397
120	4.2	2088.4	0.010832801	0.1222648	39.714	10832801
121	4.4	2090.3	0.010125085	0.111432	41.595	10125085
122	4.6	2092.2	0.0094381	0.10130692	43.487	9438100
123	4.8	2094.1	0.008768359	0.091868817	45.377	8768359
124	5	2096	0.008128362	0.083100458	47.27	8128362
125	5.2	2097.9	0.007499908	0.074972096	49.154	7499908
126	5.4	2099.8	0.006905214	0.067472188	51.042	6905214
127	5.6	2101.7	0.006341514	0.060566974	52.933	6341514
128	5.8	2103.5	0.005803344	0.05422546	54.825	5803344
129	6	2105.4	0.00529702	0.048422116	56.71	5297020
130	6.2	2107.3	0.004811782	0.043125096	58.603	4811782
131	6.4	2109.2	0.004367241	0.038313314	60.492	4367241
132	6.6	2111.1	0.003947695	0.033946073	62.384	3947695
133	6.8	2113	0.003561698	0.029998378	64.261	3561698
134	7	2114.9	0.003199474	0.02643668	66.155	3199474
135	7.2	2116.8	0.002866145	0.023237206	68.041	2866145
136	7.4	2118.7	0.002559496	0.020371061	69.937	2559496
137	7.6	2120.5	0.002281199	0.017811565	71.818	2281199
138	7.8	2122.4	0.002022901	0.015530366	73.717	2022901
139	8	2124.3	0.001793793	0.013507465	75.605	1793793
140	8.2	2126.2	0.001580891	0.011713672	77.48	1580891
141	8.4	2128.1	0.001391224	0.010132781	79.381	1391224
142	8.6	2130	0.001220598	0.008741557	81.273	1220598
143	8.8	2131.9	0.001066654	0.007520959	83.165	1066654
144	9	2133.8	0.000932169	0.006454305	85.044	932169
145	9.2	2135.7	0.000811307	0.005522136	86.942	811307
146	9.4	2137.6	0.000702448	0.004710829	88.834	702448
147	9.6	2139.4	0.000606946	0.004008381	90.689	606946
148	9.8	2141.3	0.000522094	0.003401435	92.598	522094
149	10	2143.2	0.00044858	0.002879341	94.483	448580
150	10.2	2145.1	0.000385515	0.002430761	96.351	385515
151	10.4	2146.9	0.000327957	0.002045246	98.227	327957
152	10.6	2148.8	0.000280011	0.001717289	100.12	280011
153	10.8	2150.7	0.000237627	0.001437278	102.02	237627
154	11	2152.7	0.000200612	0.001199651	103.94	200612
155	11.2	2154.5	0.000169671	0.000999039	105.82	169671
156	11.4	2156.4	0.000142792	0.000829368	107.72	142792
157	11.6	2158.3	0.000120148	0.000686576	109.6	120148
158	11.8	2160.2	9.9731e-05	0.000566428	111.51	99731
159	12	2162.1	8.3322e-05	0.000466697	113.36	83322
160	12.2	2163.9	6.933e-05	0.000383375	115.18	69330
161	12.4	2165.9	5.7663e-05	0.000314045	117.17	57663
162	12.6	2167.7	4.7605e-05	0.000256382	118.95	47605
163	12.8	2169.6	3.9098e-05	0.000208777	120.91	39098
164	13	2171.5	3.2085e-05	0.000169679	122.75	32085
165	13.2	2173.5	2.665e-05	0.000137594	124.76	26650
166	13.4	2175.3	2.169e-05	0.000110944	126.54	21690
167	13.6	2177.2	1.7689e-05	8.9254e-05	128.51	17689
168	13.8	2178.9	1.4279e-05	7.1565e-05	130.21	14279
169	14	2180.9	1.1485e-05	5.7286e-05	132.19	11485
170	14.2	2183	9.398e-06	4.5801e-05	134.32	9398
171	14.4	2184.8	7.409e-06	3.6403e-05	136.09	7409
172	14.6	2186.5	6.013e-06	2.8994e-05	137.78	6013
173	14.8	2188.6	4.763e-06	2.2981e-05	139.9	4763
174	15	2190.7	3.881e-06	1.8218e-05	142.03	3881
175	15.2	2191.8	3.111e-06	1.4337e-05	143.1	3111
176	15.4	2194.5	2.431e-06	1.1226e-05	145.76	2431
177	15.6	2195.9	1.939e-06	8.795e-06	147.19	1939
178	15.8	2197.7	1.522e-06	6.856e-06	148.99	1522
179	16	2199.8	1.224e-06	5.334e-06	151.06	1224
180	16.2	2201.7	9.69e-07	4.11e-06	152.99	969
181	16.4	2203.7	7.35e-07	3.141e-06	154.99	735
182	16.6	2205.5	5.81e-07	2.406e-06	156.79	581
183	16.8	2207.8	3.91e-07	1.825e-06	159.07	391
184	17	2209	3.54e-07	1.434e-06	160.27	354
185	17.2	2211	2.46e-07	1.08e-06	162.33	246
186	17.4	2210.3	1.71e-07	8.34e-07	161.6	171
187	17.6	2213.5	1.64e-07	6.63e-07	164.74	164
188	17.8	2217.3	1.26e-07	4.99e-07	168.55	126
189	18	2217.9	8.6e-08	3.73e-07	169.21	86
190	18.2	2219.3	7.1e-08	2.87e-07	170.61	71
191	18.4	2223.3	4.9e-08	2.16e-07	174.63	49
192	18.6	2221.8	4.1e-08	1.67e-07	173.06	41
193	18.8	2226.9	3.6e-08	1.26e-07	178.2	36
194	19	2229.2	1.9e-08	9e-08	180.49	19
195	19.2	2231.8	2.1e-08	7.1e-08	183.05	21
196	19.4	2229.7	1.4e-08	5e-08	181	14
197	19.6	2236.1	1.2e-08	3.6e-08	187.37	12
198	19.8	2236	6e-09	2.4e-08	187.28	6
199	20	2245.8	1.8e-08	1.8e-08	197.12	18
