# Supplementary material for: Quantifying the Potential for Future Gene Therapy to Lower Lifetime Risk of Polygenic Late-Onset Diseases
Source: MDPI journal article supplement (doi:10.3390/ijms20133352), 2019-07-08
Supplement: s2 [file s2 › SuppFiles/Results/LODsCommonLow/Alzheimers/1.000/ScatterData.csv]

Age	OR	Beta
51	23855	10.08
51	1.9652e+05	12.188
52	1477.5	7.2981
53	138.15	4.9283
53	887.27	6.7881
55	62809	11.048
55	650.48	6.4777
55	417.01	6.0331
56	149.95	5.0103
56	2265	7.7253
56	15388	9.6413
57	12978	9.471
57	404.35	6.0023
57	256.57	5.5474
57	1344.9	7.2041
57	1794.6	7.4925
57	26952	10.202
57	3353.8	8.1179
58	482.65	6.1793
58	536.26	6.2846
59	545.75	6.3022
59	8228.4	9.0153
60	880.09	6.78
60	2543.7	7.8414
61	170.83	5.1407
61	247.57	5.5117
61	576.22	6.3565
61	3990.3	8.2916
61	18554	9.8284
62	28797	10.268
62	77135	11.253
62	339.29	5.8268
62	3922	8.2744
63	1898.6	7.5489
63	3.2313e+05	12.686
63	345.74	5.8457
63	91.499	4.5163
63	1176.1	7.07
63	2981.1	8
63	2733.8	7.9134
63	78.423	4.3621
64	1008.4	6.9161
64	3097	8.0382
64	55346	10.921
64	1175.8	7.0697
64	1077.5	6.9824
65	87.048	4.4665
65	774.51	6.6522
65	831.77	6.7236
65	8743.8	9.0761
65	16247	9.6956
65	63.171	4.1458
66	11368	9.3386
66	45.876	3.8259
66	2856	7.9572
66	127.88	4.8511
66	1545.4	7.343
66	24.604	3.2029
66	330.66	5.8011
66	51.261	3.9369
66	9529.7	9.1622
66	181.41	5.2007
66	905.15	6.8081
66	861.64	6.7588
67	123.24	4.8141
67	29.287	3.3771
67	42.606	3.752
67	6544.9	8.7864
67	40295	10.604
67	201.44	5.3055
67	751.81	6.6225
67	878.82	6.7786
67	649.92	6.4768
67	1497.7	7.3117
67	234.27	5.4565
68	2378.9	7.7744
68	824.75	6.7151
68	1846.4	7.521
68	385.18	5.9537
68	404.48	6.0026
68	1763.8	7.4752
68	3161.8	8.0589
68	33339	10.414
68	2071.2	7.6359
68	117.54	4.7667
68	102.82	4.633
68	1947.6	7.5744
68	1787.8	7.4887
69	1195.9	7.0866
69	958.31	6.8652
69	7.6752	2.038
69	2048.2	7.6247
69	82.817	4.4166
69	338.09	5.8233
69	853.17	6.749
69	53438	10.886
69	2419.8	7.7914
69	0.57082	-0.56069
69	2464.2	7.8096
69	44129	10.695
69	4.7508	1.5583
69	32.804	3.4906
69	35.617	3.5728
69	183.18	5.2105
69	233.94	5.4551
70	1229.3	7.1142
70	1249.6	7.1306
70	693.25	6.5414
70	19.256	2.9578
70	4263	8.3577
70	5.0079	1.611
70	2169.2	7.6821
70	336.31	5.818
70	1963.7	7.5826
70	1961.2	7.5813
70	6509.7	8.781
70	303.16	5.7142
70	656.69	6.4872
71	329.6	5.7979
71	341.39	5.833
71	1902.4	7.5509
71	190.11	5.2476
71	6274.6	8.7443
71	940.23	6.8461
71	127.77	4.8502
71	1149.4	7.047
71	906.33	6.8094
71	12564	9.4386
71	517.18	6.2484
71	217.85	5.3838
71	42.209	3.7426
71	160.48	5.0782
71	259.75	5.5597
71	40870	10.618
71	754.52	6.6261
71	269.91	5.5981
71	41.863	3.7344
71	9381.9	9.1465
71	1704.7	7.4411
72	299.45	5.7019
72	1804.7	7.4982
72	39.16	3.6677
72	44.092	3.7863
72	15238	9.6316
72	4162.3	8.3338
72	406.6	6.0078
72	2.9259	1.0736
72	265.66	5.5822
72	713.97	6.5708
72	5100.7	8.5371
72	5.9657	1.786
72	92.847	4.531
72	182.91	5.209
72	310.24	5.7373
72	132.26	4.8848
72	1769.8	7.4786
72	2937.5	7.9853
72	186.16	5.2266
72	1028.8	6.9362
72	27469	10.221
72	12647	9.4452
72	12.809	2.5502
72	129.8	4.866
72	5815.3	8.6682
72	1550	7.346
72	201.13	5.304
72	354.13	5.8697
72	12.701	2.5417
73	555.2	6.3193
73	456.64	6.1239
73	5568.7	8.6249
73	1380.4	7.2301
73	47.466	3.86
73	66.755	4.201
73	866.88	6.7649
73	517.98	6.2499
73	412.79	6.0229
73	22.738	3.124
73	447.14	6.1029
73	242.44	5.4908
73	2.1627	0.77138
73	14.836	2.697
73	288.81	5.6658
73	75.318	4.3217
73	20.405	3.0158
73	4658.2	8.4464
73	92.888	4.5314
73	714.12	6.5711
73	158.56	5.0662
73	4.7935e+05	13.08
73	1410.6	7.2517
73	190.24	5.2483
73	286.55	5.6579
73	7.865	2.0624
73	1787.6	7.4886
73	126.48	4.8401
74	29.487	3.384
74	162.4	5.0901
74	82.487	4.4126
74	0.92552	-0.077396
74	1423.5	7.2609
74	105.72	4.6608
74	488.84	6.192
74	364.84	5.8995
74	16794	9.7288
74	72.324	4.2812
74	0.74401	-0.29569
74	327.94	5.7928
74	60.124	4.0964
74	3645.9	8.2014
74	28.847	3.362
74	20.715	3.0309
74	29.817	3.3951
74	1021.7	6.9292
74	852.28	6.7479
74	4324.9	8.3721
75	21.062	3.0475
75	57.298	4.0483
75	0.21294	-1.5468
75	164.78	5.1046
75	114.81	4.7433
75	21.9	3.0865
75	4517	8.4156
75	72.042	4.2772
75	69.211	4.2372
75	958.48	6.8653
75	10.113	2.3138
75	1.2333e+06	14.025
75	70.293	4.2527
75	48.28	3.877
75	302.75	5.7129
75	1.0987e+05	11.607
75	385.21	5.9538
75	66.616	4.1989
75	73.401	4.2959
75	270.07	5.5987
75	10510	9.2601
75	21.422	3.0644
75	101.92	4.6241
75	109.56	4.6965
75	40.916	3.7115
75	98.831	4.5934
75	148.23	4.9988
75	877.73	6.7773
75	38.067	3.6394
75	747.28	6.6164
75	286.01	5.656
75	123.5	4.8162
75	96.428	4.5688
75	397.63	5.9855
75	19.166	2.9532
75	957.96	6.8648
75	100.84	4.6136
75	2.824	1.0382
75	105.79	4.6614
76	421.01	6.0427
76	11.485	2.441
76	35.909	3.581
76	58.41	4.0675
76	31.505	3.4502
76	24.95	3.2169
76	1416.3	7.2558
76	1271.5	7.148
76	17.885	2.884
76	5.7578	1.7506
76	375.19	5.9274
76	481.18	6.1762
76	9.5541	2.257
76	1187.2	7.0793
76	162.17	5.0886
76	95.497	4.5591
76	2607.8	7.8663
76	74.128	4.3058
76	887.1	6.788
76	22.695	3.1221
76	62.993	4.143
76	42.546	3.7506
76	207.49	5.3351
76	102.76	4.6324
76	55.93	4.0241
76	200.13	5.299
76	129.32	4.8623
76	216.78	5.3789
76	84.706	4.4392
76	56.741	4.0385
76	9.4303	2.2439
76	229.97	5.438
76	100.04	4.6056
76	5.9645	1.7858
76	108.09	4.6829
76	915.68	6.8197
76	717	6.5751
76	243.44	5.4949
76	894.5	6.7963
76	208.06	5.3378
76	5887.5	8.6806
76	751.56	6.6221
76	120.9	4.795
76	174.49	5.1619
76	14.933	2.7036
76	8.2995	2.1162
76	66965	11.112
76	1384.1	7.2328
76	451.65	6.1129
76	614.26	6.4204
76	38.626	3.6539
77	160.32	5.0771
77	39.218	3.6691
77	13.041	2.5681
77	146.69	4.9883
77	19.918	2.9916
77	157.01	5.0563
77	12.073	2.491
77	24.826	3.2119
77	11520	9.3519
77	1798.4	7.4947
77	563.89	6.3349
77	1384.7	7.2332
77	109.96	4.7001
77	5.8732	1.7704
77	77.157	4.3458
77	27.99	3.3319
77	116.96	4.7618
77	66.666	4.1997
77	19.319	2.9611
77	113.72	4.7337
77	110.22	4.7025
77	1195	7.0859
77	255.48	5.5431
77	73.388	4.2958
77	80.903	4.3933
77	9.173	2.2163
77	410.47	6.0173
77	124.43	4.8237
77	47.357	3.8577
77	95.482	4.5589
77	173.62	5.1569
77	137.52	4.9238
77	9.2274e+05	13.735
77	134.82	4.9039
77	53.993	3.9889
77	1245.6	7.1274
77	773.3	6.6507
77	60.691	4.1058
77	452.55	6.1149
77	444.11	6.0961
77	19.718	2.9815
77	646.73	6.4719
78	580.96	6.3647
78	303.78	5.7163
78	4053.2	8.3073
78	290.91	5.673
78	672.65	6.5112
78	514.72	6.2436
78	118.25	4.7728
78	71.277	4.2666
78	167.03	5.1182
78	779.07	6.6581
78	3492.8	8.1585
78	11684	9.366
78	16.694	2.8151
78	23.468	3.1556
78	13.29	2.587
78	2826.3	7.9467
78	130.44	4.8709
78	1098.8	7.0019
78	182.79	5.2083
78	34.009	3.5266
78	51.266	3.937
78	138.03	4.9275
78	55.408	4.0147
78	245.11	5.5017
78	29.179	3.3734
78	69.344	4.2391
78	144.91	4.9761
78	187.93	5.2361
78	104.43	4.6485
78	1235.1	7.1189
78	63.017	4.1434
78	487.1	6.1885
78	9.535	2.255
78	15.779	2.7587
78	80.538	4.3887
78	406.78	6.0083
78	46.946	3.849
78	77.351	4.3484
78	237.43	5.4699
78	187.23	5.2323
78	90.38	4.504
78	832.62	6.7246
78	2281.5	7.7326
78	0.91165	-0.092504
78	53.885	3.9868
78	58.817	4.0744
78	145.38	4.9794
78	28.369	3.3453
78	4.4672	1.4968
78	76.708	4.34
78	52.031	3.9518
79	12654	9.4457
79	775.32	6.6533
79	1.329	0.28442
79	1285.8	7.1591
79	71.949	4.276
79	230.39	5.4398
79	39.247	3.6699
79	26.412	3.2738
79	98.194	4.5869
79	70.183	4.2511
79	28.204	3.3395
79	7.9676	2.0754
79	93.093	4.5336
79	104.26	4.6469
79	1113.3	7.0151
79	19379	9.8719
79	19000	9.8522
79	272.89	5.6091
79	17.526	2.8637
79	101.66	4.6217
79	98.804	4.5931
79	4422	8.3943
79	6.6044	1.8877
79	3.7248	1.315
79	1103.3	7.006
79	1111.7	7.0137
79	2.5029	0.91746
79	39.217	3.6691
79	55.12	4.0095
79	1441.5	7.2735
79	39.963	3.688
79	114.68	4.7422
79	12.763	2.5465
79	8.0912	2.0908
79	68.381	4.2251
79	88952	11.396
79	23.254	3.1465
79	285.85	5.6555
79	327.42	5.7912
79	4.2283	1.4418
79	1.1797	0.16529
79	50.568	3.9233
79	30.678	3.4235
79	4221.9	8.348
79	72.66	4.2858
79	10.199	2.3223
79	61.117	4.1128
79	458.1	6.1271
79	341.83	5.8343
79	1.1649	0.1526
79	167.5	5.121
79	119.99	4.7874
79	9.7655e+05	13.792
80	14.353	2.664
80	206.48	5.3302
80	8576.1	9.0567
80	307.73	5.7292
80	8914.9	9.0955
80	390.83	5.9683
80	105.34	4.6572
80	2.9209	1.0719
80	1.2817	0.24817
80	5.7285	1.7454
80	49.144	3.8948
80	14.881	2.7001
80	3.8602	1.3507
80	27.65	3.3196
80	540.06	6.2917
80	52.285	3.9567
80	11.4	2.4336
80	114.23	4.7382
80	68.118	4.2212
80	37.319	3.6195
80	16.29	2.7905
80	21.081	3.0484
80	16.021	2.7739
80	283.22	5.6462
80	49.162	3.8951
80	31.952	3.4642
80	11.154	2.4118
80	7145.9	8.8743
80	4978.8	8.513
80	2756.5	7.9217
80	406.44	6.0074
80	67.567	4.2131
80	15.435	2.7366
80	58.76	4.0735
80	58.147	4.063
80	203.59	5.3161
80	219.3	5.3904
80	108.79	4.6894
80	122.69	4.8096
80	870.02	6.7685
80	280.11	5.6352
80	381.17	5.9433
80	50.716	3.9262
80	60.726	4.1064
80	592.4	6.3842
80	100.93	4.6144
80	58.103	4.0622
80	0.0081403	-4.8109
80	170.74	5.1401
80	11344	9.3364
80	317.27	5.7597
80	1866.2	7.5317
80	2507.5	7.827
80	104.38	4.648
80	0.21786	-1.5239
80	20.167	3.0041
80	888.46	6.7895
80	13.22	2.5818
80	47.533	3.8614
80	27.481	3.3135
80	141.66	4.9535
80	3311.1	8.105
80	497.86	6.2103
80	12.036	2.4879
80	73.1	4.2918
81	1481.8	7.301
81	75.516	4.3243
81	24448	10.104
81	19.826	2.987
81	127.65	4.8493
81	405.76	6.0058
81	70.044	4.2491
81	2.5456	0.93438
81	371.77	5.9183
81	25.525	3.2396
81	71.373	4.2679
81	2.5523	0.93698
81	354.08	5.8695
81	253.56	5.5356
81	1.938	0.66168
81	27.705	3.3216
81	105.16	4.6555
81	264.98	5.5797
81	309.6	5.7353
81	199.1	5.2938
81	421.86	6.0447
81	48.891	3.8896
81	2.2613	0.81593
81	33.823	3.5212
81	102.07	4.6257
81	116.18	4.7552
81	336.13	5.8175
81	6062.9	8.7099
81	87.117	4.4672
81	605.8	6.4065
81	85.988	4.4542
81	49.36	3.8991
81	211.06	5.3521
81	72.837	4.2882
81	59.856	4.0919
81	39.81	3.6841
81	614.57	6.4209
81	432.42	6.0694
81	349.96	5.8578
81	556.25	6.3212
81	917.58	6.8217
81	32.95	3.495
81	2060.8	7.6308
81	4.8813	1.5854
81	602.34	6.4008
81	128.39	4.8551
81	489.5	6.1934
81	13033	9.4752
81	50.118	3.9144
81	48.117	3.8736
81	49.752	3.9071
81	2639.4	7.8783
81	878.78	6.7785
81	115.72	4.7511
81	60.071	4.0955
81	21887	9.9936
81	118.09	4.7714
81	771.39	6.6482
81	1459.9	7.2861
81	1182.7	7.0756
81	2233.7	7.7114
81	427.48	6.0579
81	27.119	3.3002
81	35.015	3.5558
81	334.57	5.8128
81	100.62	4.6114
81	135.7	4.9104
81	14.225	2.655
81	61.093	4.1124
81	121.95	4.8036
81	10.539	2.3551
81	136.69	4.9177
81	187.52	5.2339
82	9.7538	2.2777
82	26.453	3.2754
82	209.07	5.3427
82	21.075	3.0481
82	54.668	4.0013
82	385.24	5.9539
82	44.881	3.804
82	37.23	3.6171
82	4793.8	8.4751
82	15.249	2.7245
82	9.2117	2.2205
82	72.941	4.2897
82	8.1491	2.0979
82	958.02	6.8649
82	1585.7	7.3688
82	84.75	4.4397
82	33.284	3.5051
82	22.827	3.128
82	82571	11.321
82	703.33	6.5558
82	11.635	2.4541
82	1.6217	0.4835
82	2083	7.6416
82	602.15	6.4005
82	185.32	5.2221
82	10.771	2.3769
82	212.48	5.3588
82	1.018	0.017815
82	24.456	3.1969
82	2.3635	0.86014
82	85.853	4.4526
82	13.068	2.5701
82	116.92	4.7615
82	273.2	5.6102
82	45.537	3.8185
82	41.285	3.7205
82	132.41	4.8859
82	13.734	2.6199
82	46.306	3.8353
82	25004	10.127
82	45.549	3.8188
82	142.8	4.9614
82	795.3	6.6787
82	29.951	3.3996
82	159.65	5.073
82	22.055	3.0936
82	71.659	4.2719
82	6295.7	8.7476
82	122.61	4.809
82	128.58	4.8565
82	4.7109	1.5499
82	218	5.3845
82	72.478	4.2833
82	2691.3	7.8978
82	20.836	3.0367
82	7.9966	2.079
82	44.942	3.8054
82	361.51	5.8903
82	5.2717	1.6624
82	67.163	4.2071
82	864.49	6.7621
82	1884.7	7.5415
82	11.827	2.4704
82	154.48	5.0401
82	154.74	5.0417
82	4.7625	1.5608
82	47.538	3.8615
82	596.27	6.3907
82	1.8774	0.62987
82	13.814	2.6257
82	32.845	3.4918
82	2.4397	0.89187
82	40.191	3.6936
82	42.059	3.7391
82	865.75	6.7636
83	797.48	6.6815
83	5.5159	1.7076
83	48.504	3.8816
83	82.855	4.4171
83	4.8724	1.5836
83	82.053	4.4074
83	8666.2	9.0672
83	1.045	0.043975
83	89.727	4.4968
83	92.935	4.5319
83	63.709	4.1543
83	130.98	4.875
83	20.035	2.9975
83	69.783	4.2454
83	143.45	4.966
83	91.726	4.5188
83	364.7	5.8991
83	144.1	4.9705
83	183.4	5.2116
83	13.563	2.6073
83	70.279	4.2525
83	254.48	5.5392
83	206.2	5.3288
83	514.28	6.2428
83	12.655	2.5381
83	1.2453	0.21938
83	2.9462	1.0805
83	4.1284	1.4179
83	340.65	5.8308
83	162.22	5.0889
83	22.063	3.0939
83	7.5647	2.0235
83	71.227	4.2659
83	4.3796	1.477
83	566.26	6.3391
83	2.0441	0.71494
83	9609.7	9.1705
83	80.463	4.3878
83	17.811	2.8798
83	21.088	3.0487
83	41.637	3.729
83	8.6027	2.1521
83	1.5993	0.46958
83	206.87	5.3321
83	181.12	5.1992
83	6.3305	1.8454
83	188.29	5.238
83	9.4546	2.2465
83	134.1	4.8986
83	636.19	6.4555
83	9.8603	2.2885
83	101.72	4.6222
83	7.0485	1.9528
83	4.1925	1.4333
83	7.6801	2.0386
83	11.119	2.4086
83	101.2	4.6171
83	22.143	3.0975
83	31.995	3.4656
83	126.03	4.8366
83	43.693	3.7772
83	283.08	5.6457
83	52.2	3.9551
83	1.7857	0.57978
83	5072.5	8.5316
83	91.233	4.5134
83	26.201	3.2658
83	57.042	4.0438
83	3.7638	1.3254
83	7.4114	2.003
83	1.8708	0.62634
83	274.1	5.6135
83	63.819	4.1561
83	24.395	3.1944
83	322.81	5.7771
83	286.14	5.6565
83	57.712	4.0555
83	1.5173	0.41691
83	190.83	5.2514
84	219.94	5.3934
84	4.7069	1.549
84	105.33	4.6571
84	59.701	4.0894
84	809.68	6.6966
84	7.9107	2.0682
84	15.367	2.7322
84	13.116	2.5738
84	26.395	3.2732
84	48.237	3.8761
84	361.5	5.8903
84	46.115	3.8311
84	250.04	5.5216
84	42.496	3.7494
84	26.612	3.2814
84	106.7	4.67
84	82.47	4.4124
84	81.43	4.3997
84	368	5.9081
84	17.288	2.85
84	12.938	2.5602
84	182.43	5.2064
84	16.742	2.8179
84	3.8045	1.3362
84	188.22	5.2376
84	1627.9	7.395
84	1027.9	6.9352
84	32.271	3.4742
84	21.218	3.0548
84	13.359	2.5922
84	69.23	4.2374
84	7.0863	1.9582
84	35.254	3.5626
84	96.802	4.5727
84	45.274	3.8127
84	163.04	5.094
84	10.866	2.3856
84	16.058	2.7762
84	44.354	3.7922
84	367.5	5.9067
84	29.855	3.3963
84	185.02	5.2205
84	11.061	2.4034
84	9.1488	2.2136
84	34.725	3.5475
84	626.86	6.4407
84	98.833	4.5934
84	8781.1	9.0804
84	97.664	4.5815
84	3.7561	1.3234
84	2.844	1.0452
84	3292	8.0992
84	9.225	2.2219
84	88.001	4.4773
84	90.193	4.502
84	179.49	5.1901
84	3.5503	1.267
84	176.06	5.1708
84	100.51	4.6103
84	2.175	0.77705
84	12.561	2.5306
84	52.778	3.9661
84	177.32	5.1779
84	19.181	2.9539
84	19.42	2.9663
84	6.0215	1.7953
84	1.7062	0.53428
84	750.19	6.6203
84	45.494	3.8176
84	53.689	3.9832
84	58.457	4.0683
84	0.22894	-1.4743
84	121.75	4.802
84	287.71	5.662
84	44.064	3.7856
84	1.0707	0.068357
84	239.08	5.4768
84	4.6938	1.5463
84	12.085	2.492
84	155.07	5.0439
84	2.7938	1.0274
84	691.95	6.5395
84	77.851	4.3548
84	7.9974	2.0791
84	17.177	2.8436
84	917.72	6.8219
84	18.193	2.9011
84	9.7863	2.281
84	23.763	3.1681
84	9.4001	2.2407
84	4.7202	1.5518
84	80.563	4.389
84	2.8507	1.0475
84	9401.3	9.1486
84	5.8164	1.7607
84	3.9046	1.3622
85	1.1602	0.14858
85	131.96	4.8825
85	18.84	2.936
85	13807	9.5329
85	22.813	3.1273
85	95.654	4.5607
85	486.79	6.1878
85	97.265	4.5774
85	14.398	2.6671
85	7.0369	1.9512
85	11.567	2.4482
85	8.8134	2.1763
85	32.878	3.4928
85	366.12	5.9029
85	26.473	3.2761
85	7.2123	1.9758
85	0.8247	-0.19274
85	13.128	2.5748
85	591.26	6.3823
85	49.653	3.9051
85	227.17	5.4257
85	44.877	3.8039
85	895.12	6.797
85	6.2639	1.8348
85	23.348	3.1505
85	287.21	5.6602
85	60.999	4.1109
85	35.727	3.5759
85	2.0196	0.70289
85	26.131	3.2631
85	66.151	4.1919
85	3.97	1.3788
85	22.35	3.1068
85	16.198	2.7849
85	181.43	5.2008
85	50.245	3.9169
85	49.402	3.9
85	87.634	4.4732
85	636.93	6.4567
85	11.192	2.4152
85	22.513	3.1141
85	21.137	3.051
85	62.826	4.1404
85	10.423	2.344
85	264.28	5.577
85	2.6691	0.98173
85	14.392	2.6667
85	8.2083	2.1052
85	0.78504	-0.24202
85	40.961	3.7126
85	448.48	6.1059
85	40.056	3.6903
85	465.48	6.1431
85	44.434	3.794
85	9.6175	2.2636
85	126.77	4.8424
85	11.204	2.4163
85	98.094	4.5859
85	201.07	5.3036
85	7.5073	2.0159
85	15.873	2.7646
85	119.12	4.7801
85	5.5661	1.7167
85	2.7544	1.0132
85	67.416	4.2109
85	37.373	3.6209
85	82.023	4.407
85	880.86	6.7809
85	56.326	4.0312
85	44.8	3.8022
85	116.24	4.7556
85	1.2319	0.20856
85	37.51	3.6246
85	113.99	4.7361
85	9.2947	2.2294
85	153.88	5.0362
85	17.93	2.8865
85	521.77	6.2572
85	8.6452	2.157
85	39.78	3.6834
85	188.21	5.2376
85	8.6953	2.1628
85	46.846	3.8469
85	16.217	2.7861
85	9.4299	2.2439
85	6.3982	1.856
85	2607.6	7.8662
85	7.8338	2.0585
85	58.199	4.0639
85	11.754	2.4642
85	199.54	5.296
85	17.399	2.8564
85	0.95784	-0.043079
85	54.797	4.0036
85	33.358	3.5073
85	2.9178	1.0708
85	27.597	3.3177
85	7.5815	2.0257
85	42.631	3.7526
86	18.919	2.9402
86	9.4482	2.2458
86	8.307	2.1171
86	65.67	4.1846
86	14.794	2.6942
86	177.74	5.1803
86	1.5353	0.42873
86	33.467	3.5106
86	23.998	3.178
86	86.113	4.4557
86	9.6597	2.268
86	73.972	4.3037
86	12.294	2.5091
86	489.87	6.1941
86	22.455	3.1115
86	1179.1	7.0725
86	9.0066	2.198
86	14.723	2.6894
86	8.9729	2.1942
86	273.36	5.6108
86	24.864	3.2134
86	1295.3	7.1665
86	23.079	3.1389
86	457.47	6.1257
86	92.046	4.5223
86	202.13	5.3089
86	33.308	3.5058
86	19.142	2.9519
86	215	5.3706
86	3.1872	1.1591
86	19.884	2.9899
86	256.92	5.5488
86	35.071	3.5574
86	9.071	2.2051
86	45.67	3.8214
86	106.15	4.6649
86	9.3896	2.2396
86	36.872	3.6075
86	120.76	4.7938
86	123.79	4.8186
86	1118.9	7.0201
86	10.062	2.3088
86	3.0136	1.1031
86	11.018	2.3995
86	12.732	2.5441
86	6.422	1.8597
86	50.274	3.9175
86	71.164	4.265
86	101.58	4.6209
86	113.24	4.7295
86	929.01	6.8341
86	8.493	2.1392
86	0.43595	-0.83022
86	167.91	5.1234
86	9.097	2.2079
86	3.1291	1.1408
86	88.386	4.4817
86	70.124	4.2503
86	2546.4	7.8424
86	43.913	3.7822
86	99.333	4.5985
86	12.457	2.5222
86	0.85557	-0.15599
86	180.42	5.1953
86	13.925	2.6337
86	16.259	2.7886
86	7.8067	2.055
86	8.0622	2.0872
86	4.0917	1.4089
86	39.053	3.6649
86	8.2	2.1041
86	30.708	3.4245
86	11.421	2.4354
86	40.315	3.6967
86	9135	9.1199
86	5.4815	1.7014
86	11.542	2.446
86	7.2435	1.9801
86	2.3944	0.87313
86	18.101	2.896
86	2.0281	0.70709
86	90.582	4.5063
86	3.8414	1.3458
86	1462.9	7.2882
86	115.49	4.7492
86	0.67887	-0.38732
86	0.37221	-0.9883
86	11.573	2.4487
86	374.88	5.9266
86	96.145	4.5659
86	6.8812	1.9288
86	5.6178	1.7259
86	192.77	5.2615
86	7.8468	2.0601
86	97.836	4.5833
86	2.44	0.892
86	98.971	4.5948
86	21.528	3.0693
86	87.119	4.4673
87	212.23	5.3577
87	4.2423	1.4451
87	0.16979	-1.7732
87	19.139	2.9517
87	307.4	5.7281
87	139.83	4.9405
87	122.07	4.8046
87	11.05	2.4024
87	12.791	2.5488
87	105.46	4.6584
87	468.79	6.1501
87	5.1783	1.6445
87	628.34	6.4431
87	3.5657	1.2714
87	4.935	1.5964
87	206.77	5.3316
87	39.644	3.6799
87	2.731	1.0047
87	0.11366	-2.1745
87	30.491	3.4174
87	106	4.6634
87	4.632	1.533
87	159.27	5.0706
87	23.148	3.1419
87	48.283	3.8771
87	32.207	3.4722
87	136.91	4.9193
87	15.59	2.7466
87	42.936	3.7597
87	2.8746	1.0559
87	12.188	2.5005
87	58.373	4.0669
87	0.86971	-0.1396
87	60.77	4.1071
87	1.3341	0.28825
87	2.4591	0.8998
87	45.14	3.8098
87	13.25	2.584
87	1.2099	0.19055
87	84.832	4.4407
87	127.72	4.8499
87	215.74	5.3741
87	31.311	3.444
87	33.059	3.4983
87	18.796	2.9337
87	76.564	4.3381
87	54.728	4.0024
87	13.457	2.5995
87	6.4261	1.8604
87	36.209	3.5893
87	66.654	4.1995
87	5.6963	1.7398
87	25.312	3.2313
87	389.64	5.9652
87	0.23735	-1.4382
87	11.71	2.4605
87	1343.3	7.2029
87	7.4755	2.0116
87	34.135	3.5303
87	9538.4	9.1631
87	7.444	2.0074
87	145.63	4.9811
87	823.71	6.7138
87	146.8	4.9891
87	15.762	2.7576
87	6.4765	1.8682
87	101.45	4.6196
87	1.3967	0.33415
87	145.87	4.9827
87	3.5277	1.2606
87	115.08	4.7456
87	29.4	3.381
87	22.634	3.1195
87	64.004	4.1589
87	76.614	4.3388
87	11.259	2.4211
87	192.23	5.2587
87	4.8601	1.5811
87	13.356	2.592
87	9.098	2.2081
87	30.543	3.4191
87	358.16	5.881
87	41.331	3.7216
87	74.694	4.3134
87	29.449	3.3827
87	117.8	4.769
87	186.01	5.2258
87	154.23	5.0384
87	224.67	5.4147
87	115.34	4.7479
87	15.742	2.7564
87	60.39	4.1008
87	9.3828	2.2389
87	33.932	3.5244
87	1980.5	7.5911
87	119.53	4.7836
87	146.92	4.9899
87	81.148	4.3963
87	1405.5	7.2481
87	1.2161	0.19566
87	12.287	2.5086
87	25.164	3.2254
87	89.675	4.4962
87	4950	8.5071
87	1.1635	0.15147
87	32.817	3.4909
87	31.604	3.4533
87	1.2421	0.21683
87	50.652	3.925
88	2.6722	0.9829
88	35.302	3.5639
88	3.0763	1.1237
88	84.898	4.4415
88	9.7728	2.2796
88	4.6488	1.5366
88	43.742	3.7783
88	9.2589	2.2256
88	6.9479	1.9384
88	11.75	2.4638
88	17.955	2.8879
88	39.579	3.6783
88	0.22364	-1.4977
88	26.642	3.2825
88	265.25	5.5807
88	1.3812	0.32296
88	88.17	4.4793
88	39.555	3.6777
88	23.542	3.1588
88	38.401	3.6481
88	57.025	4.0435
88	3.7088	1.3107
88	169.33	5.1318
88	4.4388	1.4904
88	12591	9.4407
88	10.369	2.3388
88	17.692	2.8731
88	123.59	4.8169
88	9.4059	2.2413
88	12.973	2.5628
88	8.8862	2.1845
88	164.89	5.1053
88	420.47	6.0414
88	122.59	4.8088
88	10.239	2.3262
88	77.176	4.3461
88	5.6083	1.7243
88	1.3364	0.28999
88	133.91	4.8972
88	8.5044	2.1406
88	35.44	3.5678
88	5.8625	1.7686
88	0.28778	-1.2455
88	145.83	4.9825
88	22.859	3.1293
88	1312.6	7.1798
88	55.37	4.014
88	427.17	6.0572
88	17.305	2.851
88	5.9219	1.7786
88	2976.9	7.9987
88	15.165	2.719
88	193.13	5.2634
88	455.35	6.1211
88	5.6826	1.7374
88	1242.1	7.1245
88	38.298	3.6454
88	48.599	3.8836
88	1485.2	7.3033
88	44.493	3.7953
88	8.6778	2.1608
88	0.24976	-1.3872
88	18.153	2.8988
88	19.542	2.9726
88	10.509	2.3523
88	581.53	6.3657
88	10.733	2.3733
88	5.1024	1.6297
88	190.09	5.2475
88	24.038	3.1796
88	6.4848	1.8695
88	2.9791	1.0916
88	3.5345	1.2626
88	7.9513	2.0733
88	27.28	3.3062
88	33.689	3.5172
88	36.438	3.5956
88	78.25	4.3599
88	16.377	2.7959
88	4.3719	1.4752
88	41.001	3.7136
88	3.1479	1.1467
88	21.106	3.0496
88	8.06	2.0869
88	1.2439	0.21822
88	3.6352	1.2907
88	54.562	3.9993
88	4.1858	1.4317
88	11.684	2.4582
88	1.5829	0.45926
88	21.197	3.0538
88	69.653	4.2435
88	0.44346	-0.81316
88	28.78	3.3597
88	13.573	2.6081
88	18.57	2.9216
88	26.115	3.2625
88	2244.4	7.7162
88	5.9643	1.7858
88	0.62893	-0.46373
88	52.547	3.9617
88	61.865	4.125
88	30.804	3.4277
88	33.291	3.5053
88	5.672	1.7355
88	11.274	2.4225
88	41.303	3.7209
89	5.7851	1.7553
89	749.7	6.6197
89	30.597	3.4209
89	13.602	2.6102
89	4.1484	1.4227
89	11.329	2.4274
89	7.6654	2.0367
89	7.2093	1.9754
89	45.7	3.8221
89	3.2935	1.1919
89	2.6297	0.96688
89	81.064	4.3952
89	12.078	2.4914
89	189.31	5.2434
89	257.41	5.5507
89	12.43	2.5201
89	8.7178	2.1654
89	6.074	1.804
89	7.3664	1.9969
89	9.7146	2.2736
89	25.381	3.234
89	2.7714	1.0194
89	53.2	3.9741
89	42.391	3.7469
89	37.269	3.6182
89	10.714	2.3716
89	76.901	4.3425
89	14.598	2.6809
89	9.7777	2.2801
89	3.1402	1.1443
89	47.094	3.8521
89	97.572	4.5806
89	7.7821	2.0518
89	81.575	4.4015
89	42.173	3.7418
89	2.8855	1.0597
89	21.778	3.0809
89	0.59827	-0.51372
89	9.5931	2.261
89	106.08	4.6642
89	4.5922	1.5244
89	3.4834	1.248
89	40.627	3.7044
89	55.884	4.0233
89	9.6445	2.2664
89	0.74275	-0.29739
89	8.7188	2.1655
89	1.565	0.44789
89	189.41	5.2439
89	1.4717	0.38644
89	51.193	3.9356
89	53.785	3.985
89	1.8503	0.61534
89	98.564	4.5907
89	7.0022	1.9462
89	6.1877	1.8226
89	0.33755	-1.086
89	4.3514	1.4705
89	75.112	4.319
89	1.8247	0.60142
89	4.9623	1.6019
89	6.4228	1.8599
89	15.847	2.763
89	80.853	4.3926
89	39.617	3.6793
89	46.727	3.8443
89	9.8246	2.2849
89	21.542	3.07
89	48.24	3.8762
89	12.777	2.5476
89	2.5485	0.93549
89	6.9582	1.9399
89	204.92	5.3226
89	69.553	4.2421
89	29.478	3.3836
89	1.5749	0.45419
89	0.63731	-0.45049
89	35.478	3.5689
89	17.404	2.8567
89	13.762	2.6219
89	1448.6	7.2783
89	16.361	2.7949
89	3.0677	1.1209
89	8.4456	2.1336
89	8.2533	2.1106
89	27.591	3.3175
89	21.558	3.0708
89	561.61	6.3308
89	16.214	2.7858
89	7.8151	2.0561
89	243.1	5.4935
89	19.352	2.9628
89	27.871	3.3276
89	2.0669	0.72607
89	3.3574	1.2112
89	11.16	2.4124
89	21.001	3.0446
89	229.52	5.436
89	0.46191	-0.77238
89	0.26441	-1.3302
89	0.24684	-1.399
89	165.11	5.1066
89	11.855	2.4727
89	11.505	2.4428
89	16.948	2.8302
89	8.8521	2.1807
89	11.21	2.4168
89	30.732	3.4253
90	177.21	5.1773
90	3.3757	1.2166
90	0.18497	-1.6876
90	1.9669	0.67644
90	1.6545	0.50348
90	4.4189	1.4859
90	96.463	4.5692
90	2.946	1.0805
90	33.712	3.5179
90	11.601	2.4511
90	113.45	4.7314
90	6.6529	1.895
90	6.1268	1.8127
90	5429.4	8.5996
90	7.1365	1.9652
90	2.2398	0.8064
90	11.195	2.4155
90	17.496	2.862
90	15.663	2.7513
90	13.257	2.5845
90	9.6433	2.2663
90	216.54	5.3778
90	3.9952	1.3851
90	29.978	3.4005
90	13.346	2.5913
90	6.1105	1.81
90	6.0404	1.7985
90	5.6711	1.7354
90	2.6851	0.9877
90	5.1761	1.6441
90	18.643	2.9255
90	6.137	1.8143
90	0.093073	-2.3744
90	1.1617	0.14986
90	11.346	2.4289
90	11.115	2.4083
90	4.7902	1.5666
90	24.975	3.2179
90	138.74	4.9326
90	15.576	2.7457
90	1.5751	0.45432
90	4.6563	1.5382
90	53.947	3.988
90	4.1325	1.4189
90	15.327	2.7296
90	17.429	2.8582
90	22.772	3.1255
90	1.4571	0.37642
90	3.4815	1.2475
90	10.302	2.3323
90	10.826	2.3819
90	9.0956	2.2078
90	48.897	3.8897
90	3.0371	1.1109
90	14.235	2.6557
90	14.288	2.6594
90	27.356	3.3089
90	6.638	1.8928
90	59.247	4.0817
90	5.9921	1.7904
90	17.932	2.8866
90	259.14	5.5574
90	7.6342	2.0326
90	2.2854	0.82653
90	47.177	3.8539
90	2.3246	0.84355
90	2.7982	1.029
90	6.7534	1.91
90	37.251	3.6177
90	14.216	2.6544
90	60.325	4.0997
90	0.67489	-0.3932
90	7.569	2.0241
90	270.15	5.599
90	4.4228	1.4868
90	9.5948	2.2612
90	0.66037	-0.41496
90	11.738	2.4629
90	2.987	1.0943
90	2.5301	0.92825
90	69.884	4.2468
90	12.412	2.5186
90	8.6816	2.1612
90	8.7953	2.1742
90	20.813	3.0356
90	3.4466e+05	12.75
90	13.428	2.5974
90	15.926	2.7679
90	1.9716	0.67883
90	1493.3	7.3087
90	3.7325	1.3171
90	10.633	2.3639
90	29.053	3.3691
90	0.42601	-0.8533
90	4.549	1.5149
90	4.6995	1.5475
90	5.259	1.6599
90	11.148	2.4113
90	3.2171	1.1685
90	451.9	6.1135
90	13.775	2.6229
90	22.067	3.0941
91	4.6432	1.5354
91	3.6034	1.2819
91	0.71498	-0.33551
91	1.1656	0.1532
91	28.354	3.3448
91	10.247	2.327
91	6.5704	1.8826
91	2.6243	0.96481
91	9.4059	2.2413
91	8.1414	2.097
91	11.114	2.4082
91	35.802	3.578
91	1.3049	0.26612
91	9.1311	2.2117
91	21.75	3.0796
91	4.5211	1.5088
91	32.288	3.4747
91	0.56335	-0.57385
91	98.694	4.592
91	9.0312	2.2007
91	19.284	2.9593
91	2.8758	1.0563
91	1278.7	7.1536
91	4.6727	1.5417
91	0.68546	-0.37767
91	2.9715	1.0891
91	22.405	3.1093
91	0.76705	-0.2652
91	5.676	1.7363
91	2.0263	0.70619
91	2.4258	0.88618
91	1.8192	0.59837
91	7.0087	1.9471
91	6.7652	1.9118
91	0.21115	-1.5552
91	30.669	3.4233
91	11.551	2.4468
91	15.353	2.7313
91	5.9598	1.785
91	3.7649	1.3257
91	28.746	3.3585
91	1.121	0.1142
91	21.841	3.0838
91	2.1342	0.75811
91	20.235	3.0074
91	10.112	2.3137
91	2.7752	1.0207
91	55.371	4.0141
91	26.554	3.2792
91	9.2904	2.229
91	12.292	2.5089
91	8.6334	2.1556
91	5.9843	1.7891
91	7.6303	2.0321
91	6.8294	1.9212
91	33.93	3.5243
91	24.776	3.2099
91	1.0825	0.079291
91	5.2132	1.6512
91	1.7083	0.53547
91	3.7092	1.3108
91	23.124	3.1409
91	3.0976	1.1306
91	27.675	3.3205
91	24.505	3.1989
91	1.7105	0.5368
91	2.1287	0.75553
91	58.085	4.0619
91	22.393	3.1087
91	5.5647	1.7164
91	1.0383	0.037595
91	3.2469	1.1777
91	1.0773	0.074447
91	2.1907	0.78421
91	3.9004	1.3611
91	7.573	2.0246
91	7.4819	2.0125
91	23.765	3.1682
91	4.4063	1.483
91	9.0471	2.2024
91	13.533	2.6051
91	12.554	2.5301
91	4.0313	1.3941
91	5.8006	1.758
91	2.7279	1.0035
91	20.108	3.0011
91	3.543	1.265
91	2.9438	1.0797
91	28.171	3.3383
91	11.701	2.4597
91	8.174	2.101
91	7.9811	2.0771
91	16.051	2.7758
91	11.735	2.4626
91	0.44449	-0.81083
91	3.0271	1.1076
91	2.0549	0.72025
91	41.677	3.73
91	0.7362	-0.30626
91	8.7128	2.1648
91	9.577	2.2594
92	48.569	3.883
92	0.41415	-0.88153
92	5.5593	1.7155
92	38.049	3.6389
92	13.52	2.6041
92	1.2965	0.25968
92	3.0444	1.1133
92	17.467	2.8603
92	9.1374	2.2124
92	1.3739	0.31764
92	4.3577	1.4719
92	6.0891	1.8065
92	5.6991	1.7403
92	8.0538	2.0861
92	0.74941	-0.28847
92	0.9904	-0.0096493
92	115.97	4.7533
92	0.61208	-0.4909
92	4.6259	1.5317
92	6.5034	1.8723
92	6.1771	1.8208
92	2.5513	0.93661
92	6.8052	1.9177
92	8.7391	2.1678
92	30.621	3.4217
92	0.24904	-1.3901
92	12.989	2.5641
92	7.3386	1.9931
92	3.5022	1.2534
92	0.73812	-0.30365
92	5.0915	1.6276
92	8.7859	2.1732
92	8.9415	2.1907
92	2.7295	1.0041
92	1.3287	0.28421
92	2.2791	0.82376
92	0.91976	-0.083638
92	0.37747	-0.97426
92	4.7282	1.5535
92	173.62	5.1569
92	0.068542	-2.6803
92	6.5038	1.8724
92	6.3764	1.8526
92	3.3343	1.2043
92	6.223	1.8282
92	4.3469	1.4695
92	13.059	2.5695
92	1.3485	0.29902
92	2.8647	1.0525
92	1.6709	0.51333
92	0.54885	-0.59993
92	7.2088	1.9753
92	21.463	3.0664
92	10.535	2.3547
92	1.2443	0.21861
92	1.38	0.32209
92	3.87	1.3533
92	0.9295	-0.073113
92	10.318	2.3339
92	0.85486	-0.15682
92	1.3378	0.29104
92	17.166	2.8429
92	3.2596	1.1816
92	2.7015	0.9938
92	15.261	2.7253
92	10.529	2.3541
92	1.5276	0.42372
92	13.5	2.6027
92	2.6243	0.9648
92	8.3121	2.1177
92	2.039	0.71244
92	7.9387	2.0717
92	3.2988	1.1936
92	2.6907	0.98981
92	0.75763	-0.27755
92	16.002	2.7727
92	0.84926	-0.16339
93	10.823	2.3817
93	65.757	4.186
93	0.79387	-0.23083
93	5.844	1.7654
93	0.72328	-0.32396
93	0.91413	-0.089782
93	6.6261	1.891
93	0.55935	-0.58098
93	8.7884	2.1734
93	3.567	1.2717
93	0.44762	-0.80381
93	0.9659	-0.034691
93	5.2317	1.6547
93	1.5053	0.409
93	1.0988	0.094197
93	1.2312	0.20797
93	3.568	1.272
93	7.5519	2.0218
93	5.6372	1.7294
93	2.2991	0.83252
93	8.7668	2.171
93	5.3785	1.6824
93	4.0418	1.3967
93	1.5549	0.44141
93	8.5646	2.1476
93	26.421	3.2742
93	2.5414	0.93272
93	5.6624	1.7339
93	0.79591	-0.22827
93	1.216	0.1956
93	6.5718	1.8828
93	0.45174	-0.79465
93	1.5847	0.46038
93	7.1069	1.9611
93	18.041	2.8927
93	0.29793	-1.2109
93	6.0956	1.8076
93	4.0152	1.3901
93	5.474	1.7
93	5.7164	1.7433
93	0.24937	-1.3888
93	2.8566	1.0496
93	8.7334	2.1672
93	13.611	2.6109
93	16.722	2.8167
93	4.0288	1.3935
93	2.1639	0.77192
93	2.0992	0.74156
93	1.2222	0.20066
93	1.7926	0.58369
93	1.6691	0.51229
93	1.1501	0.13988
93	1.1822	0.16741
93	0.61498	-0.48617
93	0.98184	-0.018328
93	1.3453	0.2966
93	1.91	0.6471
93	1.2753	0.24319
93	0.96522	-0.035398
93	0.053745	-2.9235
93	2.009	0.69763
93	0.079246	-2.5352
93	9.9189	2.2944
93	1.304	0.26547
93	2.4206	0.88403
93	8.3871	2.1267
93	2.9741	1.0899
93	1.4023	0.33811
93	17.554	2.8653
93	0.16757	-1.7864
93	0.11762	-2.1403
93	0.64647	-0.43623
93	8.0448	2.085
93	2.5645	0.94175
93	1.8416	0.61066
93	0.27218	-1.3013
93	4.2462	1.446
94	3.5747	1.2739
94	0.19663	-1.6264
94	1.1366	0.12805
94	2.2942	0.83036
94	1.6901	0.52481
94	2.3911	0.87175
94	0.77685	-0.25251
94	0.83401	-0.18151
94	3.297	1.193
94	1.2608	0.23173
94	5.8723	1.7702
94	1.5031	0.40751
94	0.73575	-0.30687
94	4.7623	1.5607
94	0.40623	-0.90085
94	1.1928	0.17632
94	5.759	1.7508
94	7.449	2.0081
94	0.62903	-0.46358
94	2.7096	0.9968
94	2.0194	0.70282
94	0.54196	-0.61257
94	2.1019	0.74282
94	2.4739	0.90581
94	1.5781	0.45622
94	0.7696	-0.26189
94	0.05199	-2.9567
94	2.0403	0.71309
94	0.44824	-0.80243
94	3.0138	1.1032
94	5.6292	1.728
94	1.3203	0.27788
94	0.054471	-2.9101
94	0.80393	-0.21824
94	5.1879	1.6463
94	0.75736	-0.27792
94	0.99373	-0.0062869
94	0.49778	-0.6976
94	0.85442	-0.15733
94	0.95405	-0.047042
94	7.8867	2.0652
94	0.26699	-1.3205
94	0.06006	-2.8124
94	0.43724	-0.82728
94	4.0423	1.3968
94	8.5366	2.1444
94	2.8067	1.032
94	3.4003	1.2239
94	10.37	2.3389
94	5.1105	1.6313
94	3.5322	1.2619
94	2.4458	0.89439
94	3.9616	1.3766
94	2.6547	0.97633
94	3.2864	1.1898
94	1.8822	0.63246
94	1.8706	0.62624
94	1.6885	0.52386
94	11.654	2.4556
94	2.7805	1.0226
94	9.7129	2.2735
94	1.0722	0.069705
94	4.255	1.4481
94	0.54776	-0.60193
94	0.8709	-0.13822
94	5.0142	1.6123
94	2.2306	0.80229
94	0.83623	-0.17885
94	0.87567	-0.13276
94	0.48675	-0.72
95	1.5299	0.42522
95	4.2293	1.442
95	0.7695	-0.26202
95	2.2697	0.81965
95	0.8795	-0.1284
95	0.70816	-0.34509
95	4.7722	1.5628
95	0.73945	-0.30185
95	0.076131	-2.5753
95	0.56176	-0.57667
95	0.35076	-1.0477
95	4.3887	1.479
95	2.1951	0.78621
95	1.1786	0.16431
95	0.56019	-0.57948
95	1.7265	0.5461
95	4.4773	1.499
95	1.4389	0.3639
95	0.17424	-1.7473
95	3.8097	1.3375
95	2.3009	0.83332
95	0.21558	-1.5344
95	1.1912	0.17495
95	1.6467	0.4988
95	0.085058	-2.4644
95	4.0244	1.3924
95	2.2844	0.8261
95	1.9467	0.66613
95	0.035339	-3.3428
95	2.3282	0.84508
95	0.729	-0.31608
95	0.71917	-0.32965
95	0.32725	-1.117
95	0.25955	-1.3488
95	1.3988	0.33558
95	0.60998	-0.49432
95	0.93221	-0.070193
95	1.9632	0.67456
95	0.86391	-0.14629
95	5.0697	1.6233
95	1.0431	0.042176
95	1.3811	0.32289
95	1.5648	0.44774
96	0.049685	-3.0021
96	2.3084	0.83655
96	0.28041	-1.2715
96	1.2502	0.22329
96	0.20401	-1.5896
96	0.65951	-0.41625
96	0.88494	-0.12223
96	0.94345	-0.058212
96	0.51588	-0.66189
96	1.6555	0.50409
96	2.8227	1.0377
96	0.077	-2.5639
96	0.041993	-3.1703
96	0.011765	-4.4426
96	1.5393	0.4313
96	0.48249	-0.7288
96	0.3564	-1.0317
96	0.61729	-0.48242
96	0.62938	-0.46302
96	2.1945	0.78595
96	0.2978	-1.2113
96	0.39501	-0.92885
96	0.97386	-0.026485
96	2.4931	0.91354
96	0.6305	-0.46124
96	0.78723	-0.23923
96	0.087999	-2.4304
96	0.31011	-1.1708
96	0.38502	-0.95447
96	1.1293	0.12162
96	0.51886	-0.65612
96	1.1161	0.10981
96	1.3646	0.31084
96	1.2583	0.22976
96	0.76607	-0.26648
96	0.306	-1.1842
96	0.17051	-1.769
96	1.3751	0.31851
96	1.0618	0.059937
96	0.38013	-0.96723
96	1.1084	0.1029
96	1.8692	0.62549
96	2.2799	0.82411
96	0.11783	-2.1385
96	0.94924	-0.052088
96	0.4487	-0.80139
96	1.374	0.3177
96	0.29993	-1.2042
96	2.6269	0.96579
96	0.72306	-0.32426
96	0.48921	-0.71496
96	0.79018	-0.2355
97	0.10962	-2.2108
97	0.46668	-0.76212
97	0.49755	-0.69807
97	0.0061337	-5.094
97	0.93397	-0.068308
97	0.090077	-2.4071
97	0.42136	-0.86427
97	0.25001	-1.3863
97	0.19527	-1.6334
97	0.063626	-2.7547
97	0.59156	-0.525
97	0.12432	-2.0849
97	0.8145	-0.20518
97	0.50306	-0.68705
97	0.73306	-0.31053
97	0.22952	-1.4718
97	0.55693	-0.58531
97	1.0628	0.060863
97	0.7372	-0.3049
97	0.064975	-2.7337
97	0.34617	-1.0608
97	1.0221	0.021869
97	0.096288	-2.3404
97	1.1349	0.12655
97	0.36298	-1.0134
97	1.0855	0.082051
97	0.38537	-0.95354
97	1.8589	0.62
97	0.086804	-2.4441
97	0.16617	-1.7947
97	0.021854	-3.8234
97	0.095149	-2.3523
97	0.084168	-2.4749
97	0.40702	-0.89889
97	0.94274	-0.058967
97	0.48319	-0.72735
97	0.36388	-1.0109
97	0.47093	-0.75305
97	0.64502	-0.43847
98	0.28642	-1.2503
98	0.090184	-2.4059
98	0.52301	-0.64815
98	0.011661	-4.4515
98	0.18557	-1.6843
98	0.096387	-2.3394
98	0.098448	-2.3182
98	0.14913	-1.9029
98	0.053213	-2.9334
98	0.53853	-0.61892
98	0.44896	-0.80082
98	0.28773	-1.2457
98	0.18983	-1.6616
98	0.11286	-2.1816
98	0.24799	-1.3944
98	0.15126	-1.8888
98	0.10937	-2.213
98	0.053725	-2.9239
98	0.045961	-3.08
98	0.2698	-1.3101
98	0.094453	-2.3597
98	0.21118	-1.555
99	0.085375	-2.4607
99	0.038458	-3.2582
99	0.028298	-3.565
99	0.15307	-1.8769
99	0.31216	-1.1642
99	0.16558	-1.7983
99	0.052665	-2.9438
99	0.50557	-0.68206
99	0.54701	-0.60329
99	0.022148	-3.81
99	0.11616	-2.1528
99	0.25815	-1.3542
99	0.072505	-2.6241
99	0.46976	-0.75552
99	0.084908	-2.4662
99	0.24531	-1.4052
100	0.19456	-1.637
100	0.065564	-2.7247
100	0.044372	-3.1152
100	0.11291	-2.1812
100	0.1394	-1.9704
100	0.010786	-4.5295
100	0.08044	-2.5202
100	0.19443	-1.6377
100	0.15753	-1.8481
100	0.12147	-2.1081
100	0.031122	-3.4698
100	0.11657	-2.1493
100	0.046752	-3.0629
100	0.054815	-2.9038
100	0.078144	-2.5492
101	0.12492	-2.0801
101	0.012053	-4.4185
101	0.073053	-2.6166
101	0.028274	-3.5658
101	0.10837	-2.2222
101	0.055148	-2.8977
101	0.048766	-3.0207
101	0.018802	-3.9738
101	0.036332	-3.315
101	0.022289	-3.8037
101	0.03009	-3.5036
102	0.00091637	-6.9951
102	0.01739	-4.0518
102	0.043226	-3.1413
102	0.013214	-4.3265
102	0.0081422	-4.8107
102	0.011361	-4.4776
102	0.011885	-4.4325
103	0.019978	-3.9131
103	0.0051055	-5.2774
104	0.012744	-4.3627
104	0.0086922	-4.7453
