# Supplementary material for: Quantifying the Potential for Future Gene Therapy to Lower Lifetime Risk of Polygenic Late-Onset Diseases
Source: MDPI journal article supplement (doi:10.3390/ijms20133352), 2019-07-08
Supplement: s2 [file s2 › SuppFiles/Results/LODsCommonLow/Alzheimers/DensityPostAnalysis.csv]

age	A..1..	A..2..	A..3..	A..4..	A..5..	A..6..	A..7..	A..8..	A..9..	A..10..	A..11..	A..12..	A..13..	A..14..	A..15..	A..16..	A..17..	A..18..	A..19..	A..20..
1	0.0000000e+00	0.0000000e+00	0.0000000e+00	0.0000000e+00	0.0000000e+00	0.0000000e+00	0.0000000e+00	0.0000000e+00	0.0000000e+00	0.0000000e+00	0.0000000e+00	0.0000000e+00	0.0000000e+00	0.0000000e+00	0.0000000e+00	0.0000000e+00	0.0000000e+00	0.0000000e+00	0.0000000e+00	0.0000000e+00
2	0.0000000e+00	0.0000000e+00	0.0000000e+00	0.0000000e+00	0.0000000e+00	0.0000000e+00	0.0000000e+00	0.0000000e+00	0.0000000e+00	0.0000000e+00	0.0000000e+00	0.0000000e+00	0.0000000e+00	0.0000000e+00	0.0000000e+00	0.0000000e+00	0.0000000e+00	0.0000000e+00	0.0000000e+00	0.0000000e+00
3	0.0000000e+00	0.0000000e+00	0.0000000e+00	0.0000000e+00	0.0000000e+00	0.0000000e+00	0.0000000e+00	0.0000000e+00	0.0000000e+00	0.0000000e+00	0.0000000e+00	0.0000000e+00	0.0000000e+00	0.0000000e+00	0.0000000e+00	0.0000000e+00	0.0000000e+00	0.0000000e+00	0.0000000e+00	0.0000000e+00
4	0.0000000e+00	0.0000000e+00	0.0000000e+00	0.0000000e+00	0.0000000e+00	0.0000000e+00	0.0000000e+00	0.0000000e+00	0.0000000e+00	0.0000000e+00	0.0000000e+00	0.0000000e+00	0.0000000e+00	0.0000000e+00	0.0000000e+00	0.0000000e+00	0.0000000e+00	0.0000000e+00	0.0000000e+00	0.0000000e+00
5	0.0000000e+00	0.0000000e+00	0.0000000e+00	0.0000000e+00	0.0000000e+00	0.0000000e+00	0.0000000e+00	0.0000000e+00	0.0000000e+00	0.0000000e+00	0.0000000e+00	0.0000000e+00	0.0000000e+00	0.0000000e+00	0.0000000e+00	0.0000000e+00	0.0000000e+00	0.0000000e+00	0.0000000e+00	0.0000000e+00
6	0.0000000e+00	0.0000000e+00	0.0000000e+00	0.0000000e+00	0.0000000e+00	0.0000000e+00	0.0000000e+00	0.0000000e+00	0.0000000e+00	0.0000000e+00	0.0000000e+00	0.0000000e+00	0.0000000e+00	0.0000000e+00	0.0000000e+00	0.0000000e+00	0.0000000e+00	0.0000000e+00	0.0000000e+00	0.0000000e+00
7	0.0000000e+00	0.0000000e+00	0.0000000e+00	0.0000000e+00	0.0000000e+00	0.0000000e+00	0.0000000e+00	0.0000000e+00	0.0000000e+00	0.0000000e+00	0.0000000e+00	0.0000000e+00	0.0000000e+00	0.0000000e+00	0.0000000e+00	0.0000000e+00	0.0000000e+00	0.0000000e+00	0.0000000e+00	0.0000000e+00
8	0.0000000e+00	0.0000000e+00	0.0000000e+00	0.0000000e+00	0.0000000e+00	0.0000000e+00	0.0000000e+00	0.0000000e+00	0.0000000e+00	0.0000000e+00	0.0000000e+00	0.0000000e+00	0.0000000e+00	0.0000000e+00	0.0000000e+00	0.0000000e+00	0.0000000e+00	0.0000000e+00	0.0000000e+00	0.0000000e+00
9	0.0000000e+00	0.0000000e+00	0.0000000e+00	0.0000000e+00	0.0000000e+00	0.0000000e+00	0.0000000e+00	0.0000000e+00	0.0000000e+00	0.0000000e+00	0.0000000e+00	0.0000000e+00	0.0000000e+00	0.0000000e+00	0.0000000e+00	0.0000000e+00	0.0000000e+00	0.0000000e+00	0.0000000e+00	0.0000000e+00
10	0.0000000e+00	0.0000000e+00	0.0000000e+00	0.0000000e+00	0.0000000e+00	0.0000000e+00	0.0000000e+00	0.0000000e+00	0.0000000e+00	0.0000000e+00	0.0000000e+00	0.0000000e+00	0.0000000e+00	0.0000000e+00	0.0000000e+00	0.0000000e+00	0.0000000e+00	0.0000000e+00	0.0000000e+00	0.0000000e+00
11	0.0000000e+00	0.0000000e+00	0.0000000e+00	0.0000000e+00	0.0000000e+00	0.0000000e+00	0.0000000e+00	0.0000000e+00	0.0000000e+00	0.0000000e+00	0.0000000e+00	0.0000000e+00	0.0000000e+00	0.0000000e+00	0.0000000e+00	0.0000000e+00	0.0000000e+00	0.0000000e+00	0.0000000e+00	0.0000000e+00
12	0.0000000e+00	0.0000000e+00	0.0000000e+00	0.0000000e+00	0.0000000e+00	0.0000000e+00	0.0000000e+00	0.0000000e+00	0.0000000e+00	0.0000000e+00	0.0000000e+00	0.0000000e+00	0.0000000e+00	0.0000000e+00	0.0000000e+00	0.0000000e+00	0.0000000e+00	0.0000000e+00	0.0000000e+00	0.0000000e+00
13	0.0000000e+00	0.0000000e+00	0.0000000e+00	0.0000000e+00	0.0000000e+00	0.0000000e+00	0.0000000e+00	0.0000000e+00	0.0000000e+00	0.0000000e+00	0.0000000e+00	0.0000000e+00	0.0000000e+00	0.0000000e+00	0.0000000e+00	0.0000000e+00	0.0000000e+00	0.0000000e+00	0.0000000e+00	0.0000000e+00
14	0.0000000e+00	0.0000000e+00	0.0000000e+00	0.0000000e+00	0.0000000e+00	0.0000000e+00	0.0000000e+00	0.0000000e+00	0.0000000e+00	0.0000000e+00	0.0000000e+00	0.0000000e+00	0.0000000e+00	0.0000000e+00	0.0000000e+00	0.0000000e+00	0.0000000e+00	0.0000000e+00	0.0000000e+00	0.0000000e+00
15	0.0000000e+00	0.0000000e+00	0.0000000e+00	0.0000000e+00	0.0000000e+00	0.0000000e+00	0.0000000e+00	0.0000000e+00	0.0000000e+00	0.0000000e+00	0.0000000e+00	0.0000000e+00	0.0000000e+00	0.0000000e+00	0.0000000e+00	0.0000000e+00	0.0000000e+00	0.0000000e+00	0.0000000e+00	0.0000000e+00
16	0.0000000e+00	0.0000000e+00	0.0000000e+00	0.0000000e+00	0.0000000e+00	0.0000000e+00	0.0000000e+00	0.0000000e+00	0.0000000e+00	0.0000000e+00	0.0000000e+00	0.0000000e+00	0.0000000e+00	0.0000000e+00	0.0000000e+00	0.0000000e+00	0.0000000e+00	0.0000000e+00	0.0000000e+00	0.0000000e+00
17	0.0000000e+00	0.0000000e+00	0.0000000e+00	0.0000000e+00	0.0000000e+00	0.0000000e+00	0.0000000e+00	0.0000000e+00	0.0000000e+00	0.0000000e+00	0.0000000e+00	0.0000000e+00	0.0000000e+00	0.0000000e+00	0.0000000e+00	0.0000000e+00	0.0000000e+00	0.0000000e+00	0.0000000e+00	0.0000000e+00
18	0.0000000e+00	0.0000000e+00	0.0000000e+00	0.0000000e+00	0.0000000e+00	0.0000000e+00	0.0000000e+00	0.0000000e+00	0.0000000e+00	0.0000000e+00	0.0000000e+00	0.0000000e+00	0.0000000e+00	0.0000000e+00	0.0000000e+00	0.0000000e+00	0.0000000e+00	0.0000000e+00	0.0000000e+00	0.0000000e+00
19	0.0000000e+00	0.0000000e+00	0.0000000e+00	0.0000000e+00	0.0000000e+00	0.0000000e+00	0.0000000e+00	0.0000000e+00	0.0000000e+00	0.0000000e+00	0.0000000e+00	0.0000000e+00	0.0000000e+00	0.0000000e+00	0.0000000e+00	0.0000000e+00	0.0000000e+00	0.0000000e+00	0.0000000e+00	0.0000000e+00
20	0.0000000e+00	0.0000000e+00	0.0000000e+00	0.0000000e+00	0.0000000e+00	0.0000000e+00	0.0000000e+00	0.0000000e+00	0.0000000e+00	0.0000000e+00	0.0000000e+00	0.0000000e+00	0.0000000e+00	0.0000000e+00	0.0000000e+00	0.0000000e+00	0.0000000e+00	0.0000000e+00	0.0000000e+00	0.0000000e+00
21	0.0000000e+00	0.0000000e+00	0.0000000e+00	0.0000000e+00	0.0000000e+00	0.0000000e+00	0.0000000e+00	0.0000000e+00	0.0000000e+00	0.0000000e+00	0.0000000e+00	0.0000000e+00	0.0000000e+00	0.0000000e+00	0.0000000e+00	0.0000000e+00	0.0000000e+00	0.0000000e+00	0.0000000e+00	0.0000000e+00
22	0.0000000e+00	0.0000000e+00	0.0000000e+00	0.0000000e+00	0.0000000e+00	0.0000000e+00	0.0000000e+00	0.0000000e+00	0.0000000e+00	0.0000000e+00	0.0000000e+00	0.0000000e+00	0.0000000e+00	0.0000000e+00	0.0000000e+00	0.0000000e+00	0.0000000e+00	0.0000000e+00	0.0000000e+00	0.0000000e+00
23	0.0000000e+00	0.0000000e+00	0.0000000e+00	0.0000000e+00	0.0000000e+00	0.0000000e+00	0.0000000e+00	0.0000000e+00	0.0000000e+00	0.0000000e+00	0.0000000e+00	0.0000000e+00	0.0000000e+00	0.0000000e+00	0.0000000e+00	0.0000000e+00	0.0000000e+00	0.0000000e+00	0.0000000e+00	0.0000000e+00
24	0.0000000e+00	0.0000000e+00	0.0000000e+00	0.0000000e+00	0.0000000e+00	0.0000000e+00	0.0000000e+00	0.0000000e+00	0.0000000e+00	0.0000000e+00	0.0000000e+00	0.0000000e+00	0.0000000e+00	0.0000000e+00	0.0000000e+00	0.0000000e+00	0.0000000e+00	0.0000000e+00	0.0000000e+00	0.0000000e+00
25	0.0000000e+00	0.0000000e+00	0.0000000e+00	0.0000000e+00	0.0000000e+00	0.0000000e+00	0.0000000e+00	0.0000000e+00	0.0000000e+00	0.0000000e+00	0.0000000e+00	0.0000000e+00	0.0000000e+00	0.0000000e+00	0.0000000e+00	0.0000000e+00	0.0000000e+00	0.0000000e+00	0.0000000e+00	0.0000000e+00
26	0.0000000e+00	0.0000000e+00	0.0000000e+00	0.0000000e+00	0.0000000e+00	0.0000000e+00	0.0000000e+00	0.0000000e+00	0.0000000e+00	0.0000000e+00	0.0000000e+00	0.0000000e+00	0.0000000e+00	0.0000000e+00	0.0000000e+00	0.0000000e+00	0.0000000e+00	0.0000000e+00	0.0000000e+00	0.0000000e+00
27	0.0000000e+00	0.0000000e+00	0.0000000e+00	0.0000000e+00	0.0000000e+00	0.0000000e+00	0.0000000e+00	0.0000000e+00	0.0000000e+00	0.0000000e+00	0.0000000e+00	0.0000000e+00	0.0000000e+00	0.0000000e+00	0.0000000e+00	0.0000000e+00	0.0000000e+00	0.0000000e+00	0.0000000e+00	0.0000000e+00
28	0.0000000e+00	0.0000000e+00	0.0000000e+00	0.0000000e+00	0.0000000e+00	0.0000000e+00	0.0000000e+00	0.0000000e+00	0.0000000e+00	0.0000000e+00	0.0000000e+00	0.0000000e+00	0.0000000e+00	0.0000000e+00	0.0000000e+00	0.0000000e+00	0.0000000e+00	0.0000000e+00	0.0000000e+00	0.0000000e+00
29	0.0000000e+00	0.0000000e+00	0.0000000e+00	0.0000000e+00	0.0000000e+00	0.0000000e+00	0.0000000e+00	0.0000000e+00	0.0000000e+00	0.0000000e+00	0.0000000e+00	0.0000000e+00	0.0000000e+00	0.0000000e+00	0.0000000e+00	0.0000000e+00	0.0000000e+00	0.0000000e+00	0.0000000e+00	0.0000000e+00
30	0.0000000e+00	0.0000000e+00	0.0000000e+00	0.0000000e+00	0.0000000e+00	0.0000000e+00	0.0000000e+00	0.0000000e+00	0.0000000e+00	0.0000000e+00	0.0000000e+00	0.0000000e+00	0.0000000e+00	0.0000000e+00	0.0000000e+00	0.0000000e+00	0.0000000e+00	0.0000000e+00	0.0000000e+00	0.0000000e+00
31	0.0000000e+00	0.0000000e+00	0.0000000e+00	0.0000000e+00	0.0000000e+00	0.0000000e+00	0.0000000e+00	0.0000000e+00	0.0000000e+00	0.0000000e+00	0.0000000e+00	0.0000000e+00	0.0000000e+00	0.0000000e+00	0.0000000e+00	0.0000000e+00	0.0000000e+00	0.0000000e+00	0.0000000e+00	0.0000000e+00
32	0.0000000e+00	0.0000000e+00	0.0000000e+00	0.0000000e+00	0.0000000e+00	0.0000000e+00	0.0000000e+00	0.0000000e+00	0.0000000e+00	0.0000000e+00	0.0000000e+00	0.0000000e+00	0.0000000e+00	0.0000000e+00	0.0000000e+00	0.0000000e+00	0.0000000e+00	0.0000000e+00	0.0000000e+00	0.0000000e+00
33	0.0000000e+00	0.0000000e+00	0.0000000e+00	0.0000000e+00	0.0000000e+00	0.0000000e+00	0.0000000e+00	0.0000000e+00	0.0000000e+00	0.0000000e+00	0.0000000e+00	0.0000000e+00	0.0000000e+00	0.0000000e+00	0.0000000e+00	0.0000000e+00	0.0000000e+00	0.0000000e+00	0.0000000e+00	0.0000000e+00
34	0.0000000e+00	0.0000000e+00	0.0000000e+00	0.0000000e+00	0.0000000e+00	0.0000000e+00	0.0000000e+00	0.0000000e+00	0.0000000e+00	0.0000000e+00	0.0000000e+00	0.0000000e+00	0.0000000e+00	0.0000000e+00	0.0000000e+00	0.0000000e+00	0.0000000e+00	0.0000000e+00	0.0000000e+00	0.0000000e+00
35	0.0000000e+00	0.0000000e+00	0.0000000e+00	0.0000000e+00	0.0000000e+00	0.0000000e+00	0.0000000e+00	0.0000000e+00	0.0000000e+00	0.0000000e+00	0.0000000e+00	0.0000000e+00	0.0000000e+00	0.0000000e+00	0.0000000e+00	0.0000000e+00	0.0000000e+00	0.0000000e+00	0.0000000e+00	0.0000000e+00
36	0.0000000e+00	0.0000000e+00	0.0000000e+00	0.0000000e+00	0.0000000e+00	0.0000000e+00	0.0000000e+00	0.0000000e+00	0.0000000e+00	0.0000000e+00	0.0000000e+00	0.0000000e+00	0.0000000e+00	0.0000000e+00	0.0000000e+00	0.0000000e+00	0.0000000e+00	0.0000000e+00	0.0000000e+00	0.0000000e+00
37	0.0000000e+00	0.0000000e+00	0.0000000e+00	0.0000000e+00	0.0000000e+00	0.0000000e+00	0.0000000e+00	0.0000000e+00	0.0000000e+00	0.0000000e+00	0.0000000e+00	0.0000000e+00	0.0000000e+00	0.0000000e+00	0.0000000e+00	0.0000000e+00	0.0000000e+00	0.0000000e+00	0.0000000e+00	0.0000000e+00
38	9.1070672e-08	9.1650367e-08	9.2132666e-08	9.2553156e-08	2.2767698e-08	2.2912622e-08	2.3033197e-08	2.3138320e-08	5.6919250e-09	5.7281560e-09	5.7582997e-09	5.7845803e-09	1.4229812e-09	1.4320390e-09	1.4395749e-09	1.4461451e-09	3.5574531e-10	3.5800975e-10	3.5989373e-10	3.6153627e-10
39	2.3471963e-07	2.3628599e-07	2.3757195e-07	2.3868750e-07	5.8680109e-08	5.9071701e-08	5.9393192e-08	5.9672080e-08	1.4670030e-08	1.4767928e-08	1.4848301e-08	1.4918023e-08	3.6675075e-09	3.6919820e-09	3.7120752e-09	3.7295057e-09	9.1687687e-10	9.2299549e-10	9.2801880e-10	9.3237643e-10
40	4.3064684e-07	4.3366505e-07	4.3611249e-07	4.3821347e-07	1.0766239e-07	1.0841695e-07	1.0902881e-07	1.0955406e-07	2.6915607e-08	2.7104246e-08	2.7257212e-08	2.7388524e-08	6.7289018e-09	6.7760617e-09	6.8143031e-09	6.8471311e-09	1.6822254e-09	1.6940154e-09	1.7035758e-09	1.7117828e-09
41	6.9153216e-07	6.9663317e-07	7.0071254e-07	7.0418465e-07	1.7288480e-07	1.7416006e-07	1.7517992e-07	1.7604795e-07	4.3221223e-08	4.3540039e-08	4.3795003e-08	4.4012012e-08	1.0805306e-08	1.0885010e-08	1.0948751e-08	1.1003003e-08	2.7013265e-09	2.7212525e-09	2.7371877e-09	2.7507508e-09
42	1.0304051e-06	1.0384294e-06	1.0447529e-06	1.0500901e-06	2.5760519e-07	2.5961131e-07	2.6119220e-07	2.6252650e-07	6.4401349e-08	6.4902878e-08	6.5298103e-08	6.5631679e-08	1.6100337e-08	1.6225720e-08	1.6324526e-08	1.6407920e-08	4.0250843e-09	4.0564299e-09	4.0811315e-09	4.1019799e-09
43	1.4646070e-06	1.4766867e-06	1.4860863e-06	1.4939067e-06	3.6615966e-07	3.6917967e-07	3.7152962e-07	3.7348475e-07	9.1540020e-08	9.2295023e-08	9.2882512e-08	9.3371295e-08	2.2885005e-08	2.3073756e-08	2.3220628e-08	2.3342824e-08	5.7212513e-09	5.7684390e-09	5.8051570e-09	5.8357060e-09
44	2.0197275e-06	2.0374365e-06	2.0510329e-06	2.0621955e-06	5.0494697e-07	5.0937435e-07	5.1277357e-07	5.1556429e-07	1.2623694e-07	1.2734379e-07	1.2819359e-07	1.2889127e-07	3.1559236e-08	3.1835948e-08	3.2048399e-08	3.2222819e-08	7.8898088e-09	7.9589868e-09	8.0120997e-09	8.0557047e-09
45	2.7249484e-06	2.7505094e-06	2.7697864e-06	2.7854181e-06	6.8126465e-07	6.8765514e-07	6.9247461e-07	6.9638267e-07	1.7031652e-07	1.7191415e-07	1.7311902e-07	1.7409604e-07	4.2579133e-08	4.2978539e-08	4.3279756e-08	4.3524011e-08	1.0644783e-08	1.0744635e-08	1.0819939e-08	1.0881002e-08
46	3.6202769e-06	3.6568661e-06	3.6838406e-06	3.7054125e-06	9.0511795e-07	9.1426575e-07	9.2100972e-07	9.2640301e-07	2.2628013e-07	2.2856709e-07	2.3025308e-07	2.3160141e-07	5.6570035e-08	5.7141774e-08	5.7563273e-08	5.7900355e-08	1.4142508e-08	1.4285443e-08	1.4390818e-08	1.4475088e-08
47	4.7549281e-06	4.8069633e-06	4.8443978e-06	4.8738976e-06	1.1888163e-06	1.2018260e-06	1.2111853e-06	1.2185608e-06	2.9720518e-07	3.0045762e-07	3.0279746e-07	3.0464134e-07	7.4301300e-08	7.5114410e-08	7.5699368e-08	7.6160338e-08	1.8575324e-08	1.8778602e-08	1.8924841e-08	1.9040084e-08
48	6.1743060e-06	6.2477634e-06	6.2992937e-06	6.3393908e-06	1.5437190e-06	1.5620850e-06	1.5749688e-06	1.5849940e-06	3.8593162e-07	3.9052316e-07	3.9374411e-07	3.9625042e-07	9.6482913e-08	9.7630797e-08	9.8436036e-08	9.9062614e-08	2.4120727e-08	2.4407698e-08	2.4609008e-08	2.4765652e-08
49	7.9763896e-06	8.0800565e-06	8.1509025e-06	8.2052961e-06	1.9943360e-06	2.0202558e-06	2.0379694e-06	2.0515694e-06	4.9858713e-07	5.0506712e-07	5.0949556e-07	5.1289559e-07	1.2464679e-07	1.2626679e-07	1.2737390e-07	1.2822391e-07	3.1161696e-08	3.1566696e-08	3.1843473e-08	3.2055975e-08
50	1.0239448e-05	1.0385194e-05	1.0482611e-05	1.0556079e-05	2.5602564e-06	2.5966987e-06	2.6210566e-06	2.6394264e-06	6.4006930e-07	6.4917993e-07	6.5526945e-07	6.5986194e-07	1.6001734e-07	1.6229500e-07	1.6381738e-07	1.6496551e-07	4.0004333e-08	4.0573747e-08	4.0954343e-08	4.1241373e-08
51	1.3080713e-05	1.3284992e-05	1.3419260e-05	1.3518246e-05	3.2708244e-06	3.3219042e-06	3.3554779e-06	3.3802292e-06	8.1771461e-07	8.3048470e-07	8.3887820e-07	8.4506608e-07	2.0442869e-07	2.0762121e-07	2.0971958e-07	2.1126655e-07	5.1107166e-08	5.1905296e-08	5.2429890e-08	5.2816633e-08
52	1.6678350e-05	1.6964817e-05	1.7150470e-05	1.7284030e-05	4.1706424e-06	4.2422772e-06	4.2887022e-06	4.3221008e-06	1.0426745e-06	1.0605834e-06	1.0721898e-06	1.0805396e-06	2.6066867e-07	2.6514591e-07	2.6804751e-07	2.7013495e-07	6.5167159e-08	6.6286468e-08	6.7011869e-08	6.7533728e-08
53	2.1180979e-05	2.1581056e-05	2.1837811e-05	2.2017925e-05	5.2969538e-06	5.3970053e-06	5.4612149e-06	5.5062579e-06	1.3242609e-06	1.3492742e-06	1.3653269e-06	1.3765878e-06	3.3106532e-07	3.3731865e-07	3.4133182e-07	3.4414705e-07	8.2766315e-08	8.4329647e-08	8.5332939e-08	8.6036748e-08
54	2.6858139e-05	2.7415250e-05	2.7771558e-05	2.8015059e-05	6.7172965e-06	6.8566314e-06	6.9457451e-06	7.0066454e-06	1.6793605e-06	1.7141950e-06	1.7364739e-06	1.7516993e-06	4.1984026e-07	4.2854888e-07	4.3411861e-07	4.3792497e-07	1.0496004e-07	1.0713720e-07	1.0852963e-07	1.0948122e-07
55	3.3992183e-05	3.4765095e-05	3.5259936e-05	3.5590686e-05	8.5024934e-06	8.6958227e-06	8.8195975e-06	8.9023283e-06	2.1256819e-06	2.1740156e-06	2.2049601e-06	2.2256434e-06	5.3142071e-07	5.4350412e-07	5.5124026e-07	5.5641108e-07	1.3285514e-07	1.3587599e-07	1.3781003e-07	1.3910273e-07
56	4.2978294e-05	4.4046863e-05	4.4734734e-05	4.5186857e-05	1.0751726e-05	1.1019046e-05	1.1191128e-05	1.1304234e-05	2.6880256e-06	2.7548580e-06	2.7978801e-06	2.8261576e-06	6.7200677e-07	6.8871488e-07	6.9947040e-07	7.0653978e-07	1.6800163e-07	1.7217866e-07	1.7486754e-07	1.7663488e-07
57	5.4315084e-05	5.5787111e-05	5.6745308e-05	5.7366296e-05	1.3590268e-05	1.3958587e-05	1.4198339e-05	1.4353717e-05	3.3977185e-06	3.4898022e-06	3.5497429e-06	3.5885892e-06	8.4943021e-07	8.7245115e-07	8.8743634e-07	8.9714793e-07	2.1235745e-07	2.1811268e-07	2.2185898e-07	2.2428688e-07
58	6.8578533e-05	7.0601120e-05	7.1934669e-05	7.2790495e-05	1.7163091e-05	1.7669282e-05	1.8003028e-05	1.8217215e-05	4.2910159e-06	4.4175709e-06	4.5010122e-06	4.5545619e-06	1.0727549e-06	1.1043937e-06	1.1252540e-06	1.1386415e-06	2.6818857e-07	2.7609826e-07	2.8131334e-07	2.8466020e-07
59	8.6588082e-05	8.9360778e-05	9.1214361e-05	9.2399849e-05	2.1676671e-05	2.2370795e-05	2.2834825e-05	2.3131603e-05	5.4195585e-06	5.5931019e-06	5.7091179e-06	5.7833177e-06	1.3548912e-06	1.3982771e-06	1.4272811e-06	1.4458311e-06	3.3872253e-07	3.4956899e-07	3.5682000e-07	3.6145749e-07
60	1.0925542e-04	1.1303912e-04	1.1560939e-04	1.1725496e-04	2.7361452e-05	2.8309024e-05	2.8952714e-05	2.9364821e-05	6.8409903e-06	7.0779052e-06	7.2388423e-06	7.3418787e-06	1.7102500e-06	1.7694788e-06	1.8097132e-06	1.8354723e-06	4.2756209e-07	4.4236928e-07	4.5242785e-07	4.5886762e-07
61	1.3789520e-04	1.4304429e-04	1.4660081e-04	1.4889024e-04	3.4550297e-05	3.5840427e-05	3.6731528e-05	3.7305157e-05	8.6385832e-06	8.9611533e-06	9.1839545e-06	9.3273785e-06	2.1596497e-06	2.2402924e-06	2.2959928e-06	2.3318489e-06	5.3991176e-07	5.6007240e-07	5.7399749e-07	5.8296149e-07
62	1.7406905e-04	1.8105999e-04	1.8596701e-04	1.8916117e-04	4.3640333e-05	4.5393012e-05	4.6623236e-05	4.7424035e-05	1.0911707e-05	1.1349942e-05	1.1657544e-05	1.1857774e-05	2.7279332e-06	2.8374922e-06	2.9143928e-06	2.9644503e-06	6.8198221e-07	7.0937191e-07	7.2859704e-07	7.4111140e-07
63	2.1972775e-04	2.2920688e-04	2.3596688e-04	2.4042394e-04	5.5130097e-05	5.7508429e-05	5.9204526e-05	6.0322810e-05	1.3785142e-05	1.4379838e-05	1.4803942e-05	1.5083566e-05	3.4462956e-06	3.5949700e-06	3.7009965e-06	3.7709028e-06	8.6157214e-07	8.9874068e-07	9.2524724e-07	9.4272377e-07
64	2.7744548e-04	2.9028732e-04	2.9958280e-04	3.0579696e-04	6.9680912e-05	7.2906162e-05	7.5240740e-05	7.6801436e-05	1.7424453e-05	1.8230961e-05	1.8814747e-05	1.9205016e-05	4.3561297e-06	4.5577575e-06	4.7037046e-06	4.8012721e-06	1.0890296e-06	1.1394364e-06	1.1759231e-06	1.2003149e-06
65	3.5047953e-04	3.6788975e-04	3.8063038e-04	3.8928514e-04	8.8136142e-05	9.2514342e-05	9.5718268e-05	9.7894705e-05	2.2040871e-05	2.3135760e-05	2.3936990e-05	2.4481268e-05	5.5102443e-06	5.7839680e-06	5.9842765e-06	6.1203467e-06	1.3775565e-06	1.4459872e-06	1.4960641e-06	1.5300816e-06
66	4.4267104e-04	4.6627908e-04	4.8369024e-04	4.9571623e-04	1.1150255e-04	1.1744908e-04	1.2183470e-04	1.2486387e-04	2.7886708e-05	2.9373930e-05	3.0470772e-05	3.1228367e-05	6.9717202e-06	7.3435282e-06	7.6177402e-06	7.8071401e-06	1.7429226e-06	1.8358742e-06	1.9044269e-06	1.9517767e-06
67	5.5929799e-04	5.9136872e-04	6.1511921e-04	6.3178993e-04	1.4117710e-04	1.4927234e-04	1.5526740e-04	1.5947540e-04	3.5312253e-05	3.7337094e-05	3.8836623e-05	3.9889158e-05	8.8281336e-06	9.3343479e-06	9.7092330e-06	9.9723690e-06	2.2070213e-06	2.3335742e-06	2.4272950e-06	2.4930786e-06
68	7.0650792e-04	7.5012781e-04	7.8248859e-04	8.0556654e-04	1.7882128e-04	1.8986173e-04	1.9805243e-04	2.0389360e-04	4.4734570e-05	4.7496489e-05	4.9545504e-05	5.1006750e-05	1.1183757e-05	1.1874244e-05	1.2386503e-05	1.2751818e-05	2.7959196e-06	2.9685400e-06	3.0966039e-06	3.1879321e-06
69	8.9232428e-04	9.5180815e-04	9.9586353e-04	1.0277528e-03	2.2664670e-04	2.4175536e-04	2.5294524e-04	2.6104497e-04	5.6709381e-05	6.0489725e-05	6.3289552e-05	6.5316190e-05	1.4177532e-05	1.5122630e-05	1.5822596e-05	1.6329262e-05	3.5443509e-06	3.7806234e-06	3.9556133e-06	4.0822787e-06
70	1.1263741e-03	1.2077137e-03	1.2677073e-03	1.3116102e-03	2.8739440e-04	3.0814820e-04	3.2345559e-04	3.3465740e-04	7.1926585e-05	7.7120665e-05	8.0951667e-05	8.3755158e-05	1.7981951e-05	1.9280493e-05	2.0238260e-05	2.0939145e-05	4.4954354e-06	4.8200671e-06	5.0595060e-06	5.2347251e-06
71	1.4206760e-03	1.5322334e-03	1.6139487e-03	1.6742146e-03	3.6461770e-04	3.9324898e-04	4.1422129e-04	4.2968858e-04	9.1282235e-05	9.8450092e-05	1.0370052e-04	1.0757277e-04	2.2821059e-05	2.4613062e-05	2.5925698e-05	2.6893780e-05	5.7051788e-06	6.1531729e-06	6.4813270e-06	6.7233438e-06
72	1.7893783e-03	1.9427953e-03	2.0541972e-03	2.1366977e-03	4.6274494e-04	5.0241958e-04	5.3122883e-04	5.5256399e-04	1.1589623e-04	1.2583289e-04	1.3304828e-04	1.3839175e-04	2.8974879e-05	3.1459115e-05	3.3263013e-05	3.4598919e-05	7.2435784e-06	7.8646254e-06	8.3155912e-06	8.6495611e-06
73	2.2486218e-03	2.4599393e-03	2.6118163e-03	2.7244910e-03	5.8724565e-04	6.4243293e-04	6.8209682e-04	7.1152272e-04	1.4715709e-04	1.6098640e-04	1.7092572e-04	1.7829952e-04	3.6790627e-05	4.0248080e-05	4.2733002e-05	4.4576519e-05	9.1974242e-06	1.0061766e-05	1.0682980e-05	1.1143848e-05
74	2.8183772e-03	3.1094267e-03	3.3167065e-03	3.4702235e-03	7.4546095e-04	8.2244357e-04	8.7726907e-04	9.1787433e-04	1.8693589e-04	2.0624047e-04	2.1998882e-04	2.3017121e-04	4.6736208e-05	5.1562585e-05	5.4999835e-05	5.7545557e-05	1.1683668e-05	1.2890222e-05	1.3749507e-05	1.4385916e-05
75	3.5197779e-03	3.9197588e-03	4.2028188e-03	4.4115956e-03	9.4642239e-04	1.0539720e-03	1.1300832e-03	1.1862206e-03	2.3755015e-04	2.6454490e-04	2.8364864e-04	2.9773901e-04	5.9391241e-05	6.6140350e-05	7.0916584e-05	7.4439395e-05	1.4847174e-05	1.6534378e-05	1.7728386e-05	1.8609051e-05
76	4.3751743e-03	4.9226539e-03	5.3092010e-03	5.5923453e-03	1.2016964e-03	1.3520685e-03	1.4582385e-03	1.5360077e-03	3.0199207e-04	3.3978131e-04	3.6646234e-04	3.8600610e-04	7.5504176e-05	8.4952256e-05	9.1623057e-05	9.6509395e-05	1.8874986e-05	2.1236873e-05	2.2904480e-05	2.4125996e-05
77	5.4053011e-03	6.1510453e-03	6.6784211e-03	7.0613687e-03	1.5258912e-03	1.7364113e-03	1.8852870e-03	1.9933913e-03	3.8408418e-04	4.3707449e-04	4.7454820e-04	5.0175929e-04	9.6031317e-05	1.0928031e-04	1.1864974e-04	1.2545324e-04	2.4006064e-05	2.7318069e-05	2.9660254e-05	3.1361004e-05
78	6.6216026e-03	7.6309575e-03	8.3480879e-03	8.8635000e-03	1.9361253e-03	2.2312559e-03	2.4409415e-03	2.5916455e-03	4.8839037e-04	5.6283749e-04	6.1573097e-04	6.5374628e-04	1.2211478e-04	1.4072917e-04	1.5395441e-04	1.6345957e-04	3.0525740e-05	3.5178890e-05	3.8484878e-05	4.0860939e-05
79	8.0263837e-03	9.3818508e-03	1.0350700e-02	1.1040696e-02	2.4545145e-03	2.8690242e-03	3.1653040e-03	3.3763086e-03	6.2092361e-04	7.2578298e-04	8.0073348e-04	8.5411175e-04	1.5525974e-04	1.8147946e-04	2.0022056e-04	2.1356761e-04	3.8809979e-05	4.5364070e-05	5.0048748e-05	5.3385083e-05
80	9.6043954e-03	1.1406887e-02	1.2703144e-02	1.3620484e-02	3.1087728e-03	3.6922074e-03	4.1117829e-03	4.4087097e-03	7.8943904e-04	9.3759591e-04	1.0441425e-03	1.1195439e-03	1.9740836e-04	2.3445670e-04	2.6109992e-04	2.7995489e-04	4.9343736e-05	5.8604253e-05	6.5263930e-05	6.9976875e-05
81	1.1313056e-02	1.3680685e-02	1.5392593e-02	1.6601282e-02	3.9323491e-03	4.7553225e-03	5.3503713e-03	5.7705044e-03	1.0037096e-03	1.2137688e-03	1.3656516e-03	1.4728882e-03	2.5100967e-04	3.0354169e-04	3.4152484e-04	3.6834278e-04	6.2738275e-05	7.5868322e-05	8.5361969e-05	9.2064942e-05
82	1.3074171e-02	1.6136982e-02	1.8363326e-02	1.9937753e-02	4.9639000e-03	6.1267645e-03	6.9720457e-03	7.5698121e-03	1.2758037e-03	1.5746790e-03	1.7919301e-03	1.9455659e-03	3.1909086e-04	3.9384245e-04	4.4817906e-04	4.8660485e-04	7.9748660e-05	9.8430924e-05	1.1201098e-04	1.2161453e-04
83	1.4779070e-02	1.8669092e-02	2.1514890e-02	2.3536783e-02	6.2495701e-03	7.8945290e-03	9.0979208e-03	9.9529113e-03	1.6214000e-03	2.0481711e-03	2.3603813e-03	2.5822016e-03	4.0558934e-04	5.1234513e-04	5.9044376e-04	6.4593158e-04	1.0135619e-04	1.2803431e-04	1.4755104e-04	1.6141737e-04
84	1.6295670e-02	2.1129722e-02	2.4698035e-02	2.7248563e-02	7.8405610e-03	1.0166436e-02	1.1883307e-02	1.3110478e-02	2.0604033e-03	2.6716146e-03	3.1227874e-03	3.4452729e-03	5.1551284e-04	6.6843790e-04	7.8132131e-04	8.6200717e-04	1.2880738e-04	1.6701763e-04	1.9522297e-04	2.1538335e-04
85	1.7489916e-02	2.3351867e-02	2.7734396e-02	3.0886080e-02	9.7921768e-03	1.3074140e-02	1.5527811e-02	1.7292362e-02	2.6188928e-03	3.4966455e-03	4.1528735e-03	4.6247982e-03	6.5543794e-04	8.7511565e-04	1.0393518e-03	1.1574617e-03	1.6373660e-04	2.1861484e-04	2.5964307e-04	2.8914842e-04
86	1.8249066e-02	2.5176379e-02	3.0445365e-02	3.4255091e-02	1.2160624e-02	1.6776775e-02	2.0287867e-02	2.2826553e-02	3.3322502e-03	4.5971666e-03	5.5592749e-03	6.2549248e-03	8.3431505e-04	1.1510196e-03	1.3919083e-03	1.5660823e-03	2.0836339e-04	2.8745777e-04	3.4761776e-04	3.9111629e-04
87	1.8498152e-02	2.6468319e-02	3.2668901e-02	3.7176078e-02	1.4987171e-02	2.1444587e-02	2.6468288e-02	3.0119994e-02	4.2477585e-03	6.0779598e-03	7.5018088e-03	8.5367985e-03	1.0641628e-03	1.5226710e-03	1.8793785e-03	2.1386676e-03	2.6565834e-04	3.8012065e-04	4.6916935e-04	5.3389846e-04
88	1.8212738e-02	2.7143655e-02	3.4288178e-02	3.9514850e-02	1.8271732e-02	2.7231577e-02	3.4399242e-02	3.9642844e-02	5.4288165e-03	8.0909264e-03	1.0220552e-02	1.1778507e-02	1.3612125e-03	2.0287056e-03	2.5626843e-03	2.9533236e-03	3.3961355e-04	5.0614867e-04	6.3937284e-04	7.3683477e-04
89	1.7423995e-02	2.7186483e-02	3.5251257e-02	4.1204364e-02	2.1941451e-02	3.4235024e-02	4.4390723e-02	5.1887270e-02	6.9653378e-03	1.0867946e-02	1.4091884e-02	1.6471671e-02	1.7487065e-03	2.7284890e-03	3.5378856e-03	4.1353511e-03	4.3590788e-04	6.8014265e-04	8.8190456e-04	1.0308375e-03
90	1.6207081e-02	2.6635023e-02	3.5562064e-02	4.2236124e-02	2.5786287e-02	4.2377672e-02	5.6581045e-02	6.7199814e-02	8.9825963e-03	1.4762169e-02	1.9709883e-02	2.3408907e-02	2.2595379e-03	3.7133673e-03	4.9579458e-03	5.8884214e-03	5.6249274e-04	9.2441120e-04	1.2342385e-03	1.4658724e-03
91	1.4668169e-02	2.5565865e-02	3.5270623e-02	4.2652161e-02	2.9419653e-02	5.1276945e-02	7.0741584e-02	8.5546586e-02	1.1667369e-02	2.0335626e-02	2.8054994e-02	3.3926424e-02	2.9438121e-03	5.1309134e-03	7.0785993e-03	8.5600289e-03	7.3130429e-04	1.2746258e-03	1.7584716e-03	2.1264896e-03
92	1.5292395e-02	2.8481381e-02	4.0752950e-02	5.0299910e-02	3.2253958e-02	6.0071510e-02	8.5954092e-02	1.0609007e-01	1.5292395e-02	2.8481381e-02	4.0752950e-02	5.0299910e-02	3.8774127e-03	7.2215024e-03	1.0332980e-02	1.2753628e-02	9.5997692e-04	1.7879128e-03	2.5582580e-03	3.1575664e-03
93	2.0197110e-02	4.0514944e-02	6.0382116e-02	7.6275385e-02	3.3571152e-02	6.7342968e-02	1.0036571e-01	1.2678312e-01	2.0197110e-02	4.0514944e-02	6.0382116e-02	7.6275385e-02	5.1627354e-03	1.0356330e-02	1.5434727e-02	1.9497326e-02	1.2710484e-03	2.5496943e-03	3.7999790e-03	4.8001773e-03
94	2.6727090e-02	5.8223182e-02	9.0845041e-02	1.1779390e-01	3.2841404e-02	7.1542807e-02	1.1162752e-01	1.4474143e-01	2.6727090e-02	5.8223182e-02	9.0845041e-02	1.1779390e-01	6.9258313e-03	1.5087462e-02	2.3540814e-02	3.0524113e-02	1.6890431e-03	3.6794678e-03	5.7410363e-03	7.4440944e-03
95	3.5297325e-02	8.4200092e-02	1.3837602e-01	1.8475437e-01	3.5297325e-02	8.4200092e-02	1.3837602e-01	1.8475437e-01	3.5297325e-02	8.4200092e-02	1.3837602e-01	1.8475437e-01	9.3638544e-03	2.2337030e-02	3.6709097e-02	4.9012581e-02	2.2465328e-03	5.3589972e-03	8.8070774e-03	1.1758873e-02
96	4.6453997e-02	1.2237994e-01	2.1330195e-01	1.4894172e-01	4.6453997e-02	1.2237994e-01	2.1330195e-01	6.7468147e-02	4.6453997e-02	1.2237994e-01	2.1330195e-01	2.9427100e-01	1.2848153e-02	3.3847597e-02	5.8994625e-02	8.1388882e-02	2.9932623e-03	7.8855488e-03	1.3744107e-02	1.8961346e-02
97	6.0791390e-02	1.7817431e-01	8.2031674e-02	0.0000000e+00	6.0791390e-02	1.7817431e-01	3.0478354e-02	0.0000000e+00	6.0791390e-02	1.7817431e-01	3.3184143e-01	1.5730494e-01	1.8162018e-02	5.3231305e-02	9.9140851e-02	1.4185696e-01	4.0036573e-03	1.1734373e-02	2.1854729e-02	3.1271120e-02
98	5.2540000e-02	1.7232000e-01	0.0000000e+00	0.0000000e+00	5.2540000e-02	1.6419015e-01	0.0000000e+00	0.0000000e+00	5.2540000e-02	1.7232000e-01	2.1980387e-02	0.0000000e+00	2.7546862e-02	9.0347836e-02	1.8123570e-01	2.7010763e-01	5.4211441e-03	1.7780197e-02	3.5666671e-02	5.3156413e-02
99	3.8595000e-02	6.3969651e-03	0.0000000e+00	0.0000000e+00	3.8595000e-02	0.0000000e+00	0.0000000e+00	0.0000000e+00	3.8595000e-02	1.4221000e-01	0.0000000e+00	0.0000000e+00	3.8595000e-02	1.4221000e-01	3.0979500e-01	3.6488336e-01	7.5535424e-03	2.7832343e-02	6.0630902e-02	9.4601783e-02
100	2.7715000e-02	0.0000000e+00	0.0000000e+00	0.0000000e+00	2.7715000e-02	0.0000000e+00	0.0000000e+00	0.0000000e+00	2.7715000e-02	9.3539397e-02	0.0000000e+00	0.0000000e+00	2.7715000e-02	1.1486500e-01	2.3905981e-01	0.0000000e+00	1.1318911e-02	4.6911302e-02	1.1190468e-01	1.8390627e-01
101	1.9470000e-02	0.0000000e+00	0.0000000e+00	0.0000000e+00	1.9470000e-02	0.0000000e+00	0.0000000e+00	0.0000000e+00	1.9470000e-02	0.0000000e+00	0.0000000e+00	0.0000000e+00	1.9470000e-02	9.0640000e-02	0.0000000e+00	0.0000000e+00	1.9470000e-02	9.0640000e-02	2.3878500e-01	4.1619000e-01
102	1.3365000e-02	0.0000000e+00	0.0000000e+00	0.0000000e+00	1.3365000e-02	0.0000000e+00	0.0000000e+00	0.0000000e+00	1.3365000e-02	0.0000000e+00	0.0000000e+00	0.0000000e+00	1.3365000e-02	6.9840000e-02	0.0000000e+00	0.0000000e+00	1.3365000e-02	6.9840000e-02	2.0469500e-01	1.6728438e-01
103	8.9400000e-03	0.0000000e+00	0.0000000e+00	0.0000000e+00	8.9400000e-03	0.0000000e+00	0.0000000e+00	0.0000000e+00	8.9400000e-03	0.0000000e+00	0.0000000e+00	0.0000000e+00	8.9400000e-03	5.2540000e-02	0.0000000e+00	0.0000000e+00	8.9400000e-03	5.2540000e-02	1.7232000e-01	0.0000000e+00
104	5.8150000e-03	0.0000000e+00	0.0000000e+00	0.0000000e+00	5.8150000e-03	0.0000000e+00	0.0000000e+00	0.0000000e+00	5.8150000e-03	0.0000000e+00	0.0000000e+00	0.0000000e+00	5.8150000e-03	3.8595000e-02	0.0000000e+00	0.0000000e+00	5.8150000e-03	3.8595000e-02	1.1307523e-01	0.0000000e+00
105	3.6700000e-03	0.0000000e+00	0.0000000e+00	0.0000000e+00	3.6700000e-03	0.0000000e+00	0.0000000e+00	0.0000000e+00	3.6700000e-03	0.0000000e+00	0.0000000e+00	0.0000000e+00	3.6700000e-03	2.7715000e-02	0.0000000e+00	0.0000000e+00	3.6700000e-03	2.7715000e-02	0.0000000e+00	0.0000000e+00
106	2.2400000e-03	0.0000000e+00	0.0000000e+00	0.0000000e+00	2.2400000e-03	0.0000000e+00	0.0000000e+00	0.0000000e+00	2.2400000e-03	0.0000000e+00	0.0000000e+00	0.0000000e+00	2.2400000e-03	1.9470000e-02	0.0000000e+00	0.0000000e+00	2.2400000e-03	1.9470000e-02	0.0000000e+00	0.0000000e+00
107	1.3150000e-03	0.0000000e+00	0.0000000e+00	0.0000000e+00	1.3150000e-03	0.0000000e+00	0.0000000e+00	0.0000000e+00	1.3150000e-03	0.0000000e+00	0.0000000e+00	0.0000000e+00	1.3150000e-03	1.3365000e-02	0.0000000e+00	0.0000000e+00	1.3150000e-03	1.3365000e-02	0.0000000e+00	0.0000000e+00
108	7.4500000e-04	0.0000000e+00	0.0000000e+00	0.0000000e+00	7.4500000e-04	0.0000000e+00	0.0000000e+00	0.0000000e+00	7.4500000e-04	0.0000000e+00	0.0000000e+00	0.0000000e+00	7.4500000e-04	8.9400000e-03	0.0000000e+00	0.0000000e+00	7.4500000e-04	8.9400000e-03	0.0000000e+00	0.0000000e+00
109	4.0000000e-04	0.0000000e+00	0.0000000e+00	0.0000000e+00	4.0000000e-04	0.0000000e+00	0.0000000e+00	0.0000000e+00	4.0000000e-04	0.0000000e+00	0.0000000e+00	0.0000000e+00	4.0000000e-04	5.8150000e-03	0.0000000e+00	0.0000000e+00	4.0000000e-04	5.8150000e-03	0.0000000e+00	0.0000000e+00
110	2.0500000e-04	0.0000000e+00	0.0000000e+00	0.0000000e+00	2.0500000e-04	0.0000000e+00	0.0000000e+00	0.0000000e+00	2.0500000e-04	0.0000000e+00	0.0000000e+00	0.0000000e+00	2.0500000e-04	3.6700000e-03	0.0000000e+00	0.0000000e+00	2.0500000e-04	3.6700000e-03	0.0000000e+00	0.0000000e+00
111	1.0000000e-04	0.0000000e+00	0.0000000e+00	0.0000000e+00	1.0000000e-04	0.0000000e+00	0.0000000e+00	0.0000000e+00	1.0000000e-04	0.0000000e+00	0.0000000e+00	0.0000000e+00	1.0000000e-04	2.2400000e-03	0.0000000e+00	0.0000000e+00	1.0000000e-04	2.2400000e-03	0.0000000e+00	0.0000000e+00
112	4.5000000e-05	0.0000000e+00	0.0000000e+00	0.0000000e+00	4.5000000e-05	0.0000000e+00	0.0000000e+00	0.0000000e+00	4.5000000e-05	0.0000000e+00	0.0000000e+00	0.0000000e+00	4.5000000e-05	1.3150000e-03	0.0000000e+00	0.0000000e+00	4.5000000e-05	1.3150000e-03	0.0000000e+00	0.0000000e+00
113	2.0000000e-05	0.0000000e+00	0.0000000e+00	0.0000000e+00	2.0000000e-05	0.0000000e+00	0.0000000e+00	0.0000000e+00	2.0000000e-05	0.0000000e+00	0.0000000e+00	0.0000000e+00	2.0000000e-05	7.4500000e-04	0.0000000e+00	0.0000000e+00	2.0000000e-05	7.4500000e-04	0.0000000e+00	0.0000000e+00
114	5.0000000e-06	0.0000000e+00	0.0000000e+00	0.0000000e+00	5.0000000e-06	0.0000000e+00	0.0000000e+00	0.0000000e+00	5.0000000e-06	0.0000000e+00	0.0000000e+00	0.0000000e+00	5.0000000e-06	4.0000000e-04	0.0000000e+00	0.0000000e+00	5.0000000e-06	4.0000000e-04	0.0000000e+00	0.0000000e+00
115	0.0000000e+00	0.0000000e+00	0.0000000e+00	0.0000000e+00	0.0000000e+00	0.0000000e+00	0.0000000e+00	0.0000000e+00	0.0000000e+00	0.0000000e+00	0.0000000e+00	0.0000000e+00	0.0000000e+00	2.0500000e-04	0.0000000e+00	0.0000000e+00	0.0000000e+00	2.0500000e-04	0.0000000e+00	0.0000000e+00
116	0.0000000e+00	0.0000000e+00	0.0000000e+00	0.0000000e+00	0.0000000e+00	0.0000000e+00	0.0000000e+00	0.0000000e+00	0.0000000e+00	0.0000000e+00	0.0000000e+00	0.0000000e+00	0.0000000e+00	1.0000000e-04	0.0000000e+00	0.0000000e+00	0.0000000e+00	1.0000000e-04	0.0000000e+00	0.0000000e+00
117	0.0000000e+00	0.0000000e+00	0.0000000e+00	0.0000000e+00	0.0000000e+00	0.0000000e+00	0.0000000e+00	0.0000000e+00	0.0000000e+00	0.0000000e+00	0.0000000e+00	0.0000000e+00	0.0000000e+00	4.5000000e-05	0.0000000e+00	0.0000000e+00	0.0000000e+00	4.5000000e-05	0.0000000e+00	0.0000000e+00
118	0.0000000e+00	0.0000000e+00	0.0000000e+00	0.0000000e+00	0.0000000e+00	0.0000000e+00	0.0000000e+00	0.0000000e+00	0.0000000e+00	0.0000000e+00	0.0000000e+00	0.0000000e+00	0.0000000e+00	2.0000000e-05	0.0000000e+00	0.0000000e+00	0.0000000e+00	2.0000000e-05	0.0000000e+00	0.0000000e+00
119	0.0000000e+00	0.0000000e+00	0.0000000e+00	0.0000000e+00	0.0000000e+00	0.0000000e+00	0.0000000e+00	0.0000000e+00	0.0000000e+00	0.0000000e+00	0.0000000e+00	0.0000000e+00	0.0000000e+00	5.0000000e-06	0.0000000e+00	0.0000000e+00	0.0000000e+00	5.0000000e-06	0.0000000e+00	0.0000000e+00
120	0.0000000e+00	0.0000000e+00	0.0000000e+00	0.0000000e+00	0.0000000e+00	0.0000000e+00	0.0000000e+00	0.0000000e+00	0.0000000e+00	0.0000000e+00	0.0000000e+00	0.0000000e+00	0.0000000e+00	0.0000000e+00	0.0000000e+00	0.0000000e+00	0.0000000e+00	0.0000000e+00	0.0000000e+00	0.0000000e+00
