# Supplementary material for: Quantifying the Potential for Future Gene Therapy to Lower Lifetime Risk of Polygenic Late-Onset Diseases
Source: MDPI journal article supplement (doi:10.3390/ijms20133352), 2019-07-08
Supplement: s2 [file s2 › SuppFiles/Results/LODsCommonLow/Alzheimers/EnvironmentArraySD.csv]

Age	Env	EnvSD	Incidence	CasesExpected
0	0	0	-1.18188e-05	0
1	0	0	-1.18124e-05	0
2	0	0	-1.18048e-05	0
3	0	0	-1.17959e-05	0
4	0	0	-1.17855e-05	0
5	0	0	-1.17732e-05	0
6	0	0	-1.17589e-05	0
7	0	0	-1.1742e-05	0
8	0	0	-1.17222e-05	0
9	0	0	-1.1699e-05	0
10	0	0	-1.16717e-05	0
11	0	0	-1.16397e-05	0
12	0	0	-1.16021e-05	0
13	0	0	-1.1558e-05	0
14	0	0	-1.15062e-05	0
15	0	0	-1.14455e-05	0
16	0	0	-1.13742e-05	0
17	0	0	-1.12905e-05	0
18	0	0	-1.11922e-05	0
19	0	0	-1.1077e-05	0
20	0	0	-1.09416e-05	0
21	0	0	-1.07828e-05	0
22	0	0	-1.05964e-05	0
23	0	0	-1.03777e-05	0
24	0	0	-1.01209e-05	0
25	0	0	-9.81952e-06	0
26	0	0	-9.46581e-06	0
27	0	0	-9.05066e-06	0
28	0	0	-8.56341e-06	0
29	0	0	-7.99153e-06	0
30	0	0	-7.32033e-06	0
31	0	0	-6.53254e-06	0
32	0	0	-5.60793e-06	0
33	0	0	-4.52272e-06	0
34	0	0	-3.24903e-06	0
35	0	0	-1.75413e-06	0
36	0	0	4.12359e-10	0
37	5.85315e-09	3.733e-11	2.05968e-06	51
38	1.51077e-08	1.022e-10	4.47661e-06	111
39	2.77615e-08	1.157e-10	7.3133e-06	182
40	4.46521e-08	1.157e-10	1.06427e-05	266
41	6.66484e-08	1.194e-10	1.45502e-05	363
42	9.49093e-08	1.685e-10	1.91365e-05	478
43	1.31143e-07	2.668e-10	2.45192e-05	612
44	1.77317e-07	2.858e-10	3.08367e-05	770
45	2.36134e-07	4.113e-10	3.82513e-05	956
46	3.10941e-07	5.832e-10	4.69535e-05	1173
47	4.04897e-07	4.447e-10	5.71668e-05	1428
48	5.24696e-07	5.676e-10	6.91537e-05	1728
49	6.75863e-07	8.455e-10	8.32219e-05	2079
50	8.6665e-07	6.88e-10	9.97327e-05	2492
51	1.1096e-06	1.618e-09	0.00011911	2976
52	1.41558e-06	1.403e-09	0.000141852	3544
53	1.80396e-06	1.77e-09	0.000168541	4210
54	2.29559e-06	1.735e-09	0.000199863	4991
55	2.91972e-06	7.514e-10	0.000236621	5908
56	3.7138e-06	2.538e-09	0.000279757	6984
57	4.7222e-06	3.445e-09	0.000330378	8245
58	6.00808e-06	3.735e-09	0.000389781	9725
59	7.64365e-06	3.559e-09	0.000459486	11459
60	9.73356e-06	3.415e-09	0.000541278	13493
61	1.24058e-05	4.947e-09	0.000637247	15877
62	1.58248e-05	7.661e-09	0.000749847	18671
63	2.02107e-05	5.483e-09	0.000881949	21943
64	2.58503e-05	6.321e-09	0.00103692	25777
65	3.30972e-05	9.101e-09	0.00121871	30264
66	4.24495e-05	9.49e-09	0.00143194	35516
67	5.45241e-05	1.743e-08	0.001682	41659
68	7.01623e-05	1.096e-08	0.00197524	48839
69	9.04498e-05	2.206e-08	0.00231904	57227
70	0.000116845	1.39e-08	0.00272205	67016
71	0.000151266	2.978e-08	0.00319438	78431
72	0.000196216	3.317e-08	0.00374779	91724
73	0.000255166	3.19e-08	0.00439603	107186
74	0.000332673	5.115e-08	0.00515507	125142
75	0.000434934	6.64e-08	0.0060435	145953
76	0.000570463	7.701e-08	0.00708288	170020
77	0.000750475	2.633e-08	0.00829818	197782
78	0.000990688	8.347e-08	0.00971826	229706
79	0.00131304	9.918e-08	0.0113764	266287
80	0.00174809	1.64e-07	0.0133107	308019
81	0.0023388	3.126e-07	0.0155649	355388
82	0.00314728	2.756e-07	0.0181888	408832
83	0.00426258	3.813e-07	0.0212387	468696
84	0.00581582	5.923e-07	0.0247781	535184
85	0.00800656	5.523e-07	0.0288776	608283
86	0.0111421	7.578e-07	0.0336158	687624
87	0.0157052	5.658e-07	0.0390781	772511
88	0.0224837	9.791e-07	0.0453571	861597
89	0.0327826	2.015e-06	0.0525507	952973
90	0.0488614	1.854e-06	0.0607607	1043967
91	0.0747082	3.749e-05	0.0700898	1131130
92	0.117207	6.003e-05	0.0806382	1210085
93	0.187941	1.641e-05	0.0924985	1276157
94	0.307294	5.797e-05	0.10575	1324162
95	0.512511	0.0001712	0.120452	1348805
96	0.870438	0.0004572	0.136637	1345843
97	1.50529	0.001046	0.154301	1312055
98	2.64593	0.001938	0.173401	1246818
99	4.72526	0.002412	0.193844	1152171
100	8.56396	0.002538	0.215489	1032370
101	15.7323	0.005511	0.238145	894939
102	29.266	0.01518	0.261577	748733
103	55.0086	0.03797	0.285513	603424
104	104.362	0.08071	0.309654	467452
105	199.563	0.1906	0.333693	347721
106	384.25	0.3812	0.357328	247975
107	742.713	0.5408	0.380277	169601
108	1438.7	1.019	0.402289	111189
109	2789.39	1.994	0.423159	69868
110	5439.15	3.935	0.442728	42164
111	10607.6	8.687	0.460888	24474
112	20635.8	17.48	0.477578	13677
113	39623.1	30.33	0.492782	7377
114	75736.4	112.1	0.506522	3850
115	140582	166.8	0.518847	1948
116	268508	484.1	0.529832	958
117	512802	1985	0.539564	460
118	994953	4518	0.548143	215
119	1.94248e+06	2.051e+04	0.555671	98
