# Supplementary material for: Quantifying the Potential for Future Gene Therapy to Lower Lifetime Risk of Polygenic Late-Onset Diseases
Source: MDPI journal article supplement (doi:10.3390/ijms20133352), 2019-07-08
Supplement: s2 [file s2 › SuppFiles/Results/LODsCommonLow/Alzheimers/LifetimeRiskPostAnalysis.csv]

age	A..1..	A..2..	A..3..	A..4..	A..5..	A..6..	A..7..	A..8..	A..9..	A..10..	A..11..	A..12..	A..13..	A..14..	A..15..	A..16..	A..17..	A..18..	A..19..	A..20..
1	0.0000000e+00	0.0000000e+00	0.0000000e+00	0.0000000e+00	0.0000000e+00	0.0000000e+00	0.0000000e+00	0.0000000e+00	0.0000000e+00	0.0000000e+00	0.0000000e+00	0.0000000e+00	0.0000000e+00	0.0000000e+00	0.0000000e+00	0.0000000e+00	0.0000000e+00	0.0000000e+00	0.0000000e+00	0.0000000e+00
2	0.0000000e+00	0.0000000e+00	0.0000000e+00	0.0000000e+00	0.0000000e+00	0.0000000e+00	0.0000000e+00	0.0000000e+00	0.0000000e+00	0.0000000e+00	0.0000000e+00	0.0000000e+00	0.0000000e+00	0.0000000e+00	0.0000000e+00	0.0000000e+00	0.0000000e+00	0.0000000e+00	0.0000000e+00	0.0000000e+00
3	0.0000000e+00	0.0000000e+00	0.0000000e+00	0.0000000e+00	0.0000000e+00	0.0000000e+00	0.0000000e+00	0.0000000e+00	0.0000000e+00	0.0000000e+00	0.0000000e+00	0.0000000e+00	0.0000000e+00	0.0000000e+00	0.0000000e+00	0.0000000e+00	0.0000000e+00	0.0000000e+00	0.0000000e+00	0.0000000e+00
4	0.0000000e+00	0.0000000e+00	0.0000000e+00	0.0000000e+00	0.0000000e+00	0.0000000e+00	0.0000000e+00	0.0000000e+00	0.0000000e+00	0.0000000e+00	0.0000000e+00	0.0000000e+00	0.0000000e+00	0.0000000e+00	0.0000000e+00	0.0000000e+00	0.0000000e+00	0.0000000e+00	0.0000000e+00	0.0000000e+00
5	0.0000000e+00	0.0000000e+00	0.0000000e+00	0.0000000e+00	0.0000000e+00	0.0000000e+00	0.0000000e+00	0.0000000e+00	0.0000000e+00	0.0000000e+00	0.0000000e+00	0.0000000e+00	0.0000000e+00	0.0000000e+00	0.0000000e+00	0.0000000e+00	0.0000000e+00	0.0000000e+00	0.0000000e+00	0.0000000e+00
6	0.0000000e+00	0.0000000e+00	0.0000000e+00	0.0000000e+00	0.0000000e+00	0.0000000e+00	0.0000000e+00	0.0000000e+00	0.0000000e+00	0.0000000e+00	0.0000000e+00	0.0000000e+00	0.0000000e+00	0.0000000e+00	0.0000000e+00	0.0000000e+00	0.0000000e+00	0.0000000e+00	0.0000000e+00	0.0000000e+00
7	0.0000000e+00	0.0000000e+00	0.0000000e+00	0.0000000e+00	0.0000000e+00	0.0000000e+00	0.0000000e+00	0.0000000e+00	0.0000000e+00	0.0000000e+00	0.0000000e+00	0.0000000e+00	0.0000000e+00	0.0000000e+00	0.0000000e+00	0.0000000e+00	0.0000000e+00	0.0000000e+00	0.0000000e+00	0.0000000e+00
8	0.0000000e+00	0.0000000e+00	0.0000000e+00	0.0000000e+00	0.0000000e+00	0.0000000e+00	0.0000000e+00	0.0000000e+00	0.0000000e+00	0.0000000e+00	0.0000000e+00	0.0000000e+00	0.0000000e+00	0.0000000e+00	0.0000000e+00	0.0000000e+00	0.0000000e+00	0.0000000e+00	0.0000000e+00	0.0000000e+00
9	0.0000000e+00	0.0000000e+00	0.0000000e+00	0.0000000e+00	0.0000000e+00	0.0000000e+00	0.0000000e+00	0.0000000e+00	0.0000000e+00	0.0000000e+00	0.0000000e+00	0.0000000e+00	0.0000000e+00	0.0000000e+00	0.0000000e+00	0.0000000e+00	0.0000000e+00	0.0000000e+00	0.0000000e+00	0.0000000e+00
10	0.0000000e+00	0.0000000e+00	0.0000000e+00	0.0000000e+00	0.0000000e+00	0.0000000e+00	0.0000000e+00	0.0000000e+00	0.0000000e+00	0.0000000e+00	0.0000000e+00	0.0000000e+00	0.0000000e+00	0.0000000e+00	0.0000000e+00	0.0000000e+00	0.0000000e+00	0.0000000e+00	0.0000000e+00	0.0000000e+00
11	0.0000000e+00	0.0000000e+00	0.0000000e+00	0.0000000e+00	0.0000000e+00	0.0000000e+00	0.0000000e+00	0.0000000e+00	0.0000000e+00	0.0000000e+00	0.0000000e+00	0.0000000e+00	0.0000000e+00	0.0000000e+00	0.0000000e+00	0.0000000e+00	0.0000000e+00	0.0000000e+00	0.0000000e+00	0.0000000e+00
12	0.0000000e+00	0.0000000e+00	0.0000000e+00	0.0000000e+00	0.0000000e+00	0.0000000e+00	0.0000000e+00	0.0000000e+00	0.0000000e+00	0.0000000e+00	0.0000000e+00	0.0000000e+00	0.0000000e+00	0.0000000e+00	0.0000000e+00	0.0000000e+00	0.0000000e+00	0.0000000e+00	0.0000000e+00	0.0000000e+00
13	0.0000000e+00	0.0000000e+00	0.0000000e+00	0.0000000e+00	0.0000000e+00	0.0000000e+00	0.0000000e+00	0.0000000e+00	0.0000000e+00	0.0000000e+00	0.0000000e+00	0.0000000e+00	0.0000000e+00	0.0000000e+00	0.0000000e+00	0.0000000e+00	0.0000000e+00	0.0000000e+00	0.0000000e+00	0.0000000e+00
14	0.0000000e+00	0.0000000e+00	0.0000000e+00	0.0000000e+00	0.0000000e+00	0.0000000e+00	0.0000000e+00	0.0000000e+00	0.0000000e+00	0.0000000e+00	0.0000000e+00	0.0000000e+00	0.0000000e+00	0.0000000e+00	0.0000000e+00	0.0000000e+00	0.0000000e+00	0.0000000e+00	0.0000000e+00	0.0000000e+00
15	0.0000000e+00	0.0000000e+00	0.0000000e+00	0.0000000e+00	0.0000000e+00	0.0000000e+00	0.0000000e+00	0.0000000e+00	0.0000000e+00	0.0000000e+00	0.0000000e+00	0.0000000e+00	0.0000000e+00	0.0000000e+00	0.0000000e+00	0.0000000e+00	0.0000000e+00	0.0000000e+00	0.0000000e+00	0.0000000e+00
16	0.0000000e+00	0.0000000e+00	0.0000000e+00	0.0000000e+00	0.0000000e+00	0.0000000e+00	0.0000000e+00	0.0000000e+00	0.0000000e+00	0.0000000e+00	0.0000000e+00	0.0000000e+00	0.0000000e+00	0.0000000e+00	0.0000000e+00	0.0000000e+00	0.0000000e+00	0.0000000e+00	0.0000000e+00	0.0000000e+00
17	0.0000000e+00	0.0000000e+00	0.0000000e+00	0.0000000e+00	0.0000000e+00	0.0000000e+00	0.0000000e+00	0.0000000e+00	0.0000000e+00	0.0000000e+00	0.0000000e+00	0.0000000e+00	0.0000000e+00	0.0000000e+00	0.0000000e+00	0.0000000e+00	0.0000000e+00	0.0000000e+00	0.0000000e+00	0.0000000e+00
18	0.0000000e+00	0.0000000e+00	0.0000000e+00	0.0000000e+00	0.0000000e+00	0.0000000e+00	0.0000000e+00	0.0000000e+00	0.0000000e+00	0.0000000e+00	0.0000000e+00	0.0000000e+00	0.0000000e+00	0.0000000e+00	0.0000000e+00	0.0000000e+00	0.0000000e+00	0.0000000e+00	0.0000000e+00	0.0000000e+00
19	0.0000000e+00	0.0000000e+00	0.0000000e+00	0.0000000e+00	0.0000000e+00	0.0000000e+00	0.0000000e+00	0.0000000e+00	0.0000000e+00	0.0000000e+00	0.0000000e+00	0.0000000e+00	0.0000000e+00	0.0000000e+00	0.0000000e+00	0.0000000e+00	0.0000000e+00	0.0000000e+00	0.0000000e+00	0.0000000e+00
20	0.0000000e+00	0.0000000e+00	0.0000000e+00	0.0000000e+00	0.0000000e+00	0.0000000e+00	0.0000000e+00	0.0000000e+00	0.0000000e+00	0.0000000e+00	0.0000000e+00	0.0000000e+00	0.0000000e+00	0.0000000e+00	0.0000000e+00	0.0000000e+00	0.0000000e+00	0.0000000e+00	0.0000000e+00	0.0000000e+00
21	0.0000000e+00	0.0000000e+00	0.0000000e+00	0.0000000e+00	0.0000000e+00	0.0000000e+00	0.0000000e+00	0.0000000e+00	0.0000000e+00	0.0000000e+00	0.0000000e+00	0.0000000e+00	0.0000000e+00	0.0000000e+00	0.0000000e+00	0.0000000e+00	0.0000000e+00	0.0000000e+00	0.0000000e+00	0.0000000e+00
22	0.0000000e+00	0.0000000e+00	0.0000000e+00	0.0000000e+00	0.0000000e+00	0.0000000e+00	0.0000000e+00	0.0000000e+00	0.0000000e+00	0.0000000e+00	0.0000000e+00	0.0000000e+00	0.0000000e+00	0.0000000e+00	0.0000000e+00	0.0000000e+00	0.0000000e+00	0.0000000e+00	0.0000000e+00	0.0000000e+00
23	0.0000000e+00	0.0000000e+00	0.0000000e+00	0.0000000e+00	0.0000000e+00	0.0000000e+00	0.0000000e+00	0.0000000e+00	0.0000000e+00	0.0000000e+00	0.0000000e+00	0.0000000e+00	0.0000000e+00	0.0000000e+00	0.0000000e+00	0.0000000e+00	0.0000000e+00	0.0000000e+00	0.0000000e+00	0.0000000e+00
24	0.0000000e+00	0.0000000e+00	0.0000000e+00	0.0000000e+00	0.0000000e+00	0.0000000e+00	0.0000000e+00	0.0000000e+00	0.0000000e+00	0.0000000e+00	0.0000000e+00	0.0000000e+00	0.0000000e+00	0.0000000e+00	0.0000000e+00	0.0000000e+00	0.0000000e+00	0.0000000e+00	0.0000000e+00	0.0000000e+00
25	0.0000000e+00	0.0000000e+00	0.0000000e+00	0.0000000e+00	0.0000000e+00	0.0000000e+00	0.0000000e+00	0.0000000e+00	0.0000000e+00	0.0000000e+00	0.0000000e+00	0.0000000e+00	0.0000000e+00	0.0000000e+00	0.0000000e+00	0.0000000e+00	0.0000000e+00	0.0000000e+00	0.0000000e+00	0.0000000e+00
26	0.0000000e+00	0.0000000e+00	0.0000000e+00	0.0000000e+00	0.0000000e+00	0.0000000e+00	0.0000000e+00	0.0000000e+00	0.0000000e+00	0.0000000e+00	0.0000000e+00	0.0000000e+00	0.0000000e+00	0.0000000e+00	0.0000000e+00	0.0000000e+00	0.0000000e+00	0.0000000e+00	0.0000000e+00	0.0000000e+00
27	0.0000000e+00	0.0000000e+00	0.0000000e+00	0.0000000e+00	0.0000000e+00	0.0000000e+00	0.0000000e+00	0.0000000e+00	0.0000000e+00	0.0000000e+00	0.0000000e+00	0.0000000e+00	0.0000000e+00	0.0000000e+00	0.0000000e+00	0.0000000e+00	0.0000000e+00	0.0000000e+00	0.0000000e+00	0.0000000e+00
28	0.0000000e+00	0.0000000e+00	0.0000000e+00	0.0000000e+00	0.0000000e+00	0.0000000e+00	0.0000000e+00	0.0000000e+00	0.0000000e+00	0.0000000e+00	0.0000000e+00	0.0000000e+00	0.0000000e+00	0.0000000e+00	0.0000000e+00	0.0000000e+00	0.0000000e+00	0.0000000e+00	0.0000000e+00	0.0000000e+00
29	0.0000000e+00	0.0000000e+00	0.0000000e+00	0.0000000e+00	0.0000000e+00	0.0000000e+00	0.0000000e+00	0.0000000e+00	0.0000000e+00	0.0000000e+00	0.0000000e+00	0.0000000e+00	0.0000000e+00	0.0000000e+00	0.0000000e+00	0.0000000e+00	0.0000000e+00	0.0000000e+00	0.0000000e+00	0.0000000e+00
30	0.0000000e+00	0.0000000e+00	0.0000000e+00	0.0000000e+00	0.0000000e+00	0.0000000e+00	0.0000000e+00	0.0000000e+00	0.0000000e+00	0.0000000e+00	0.0000000e+00	0.0000000e+00	0.0000000e+00	0.0000000e+00	0.0000000e+00	0.0000000e+00	0.0000000e+00	0.0000000e+00	0.0000000e+00	0.0000000e+00
31	0.0000000e+00	0.0000000e+00	0.0000000e+00	0.0000000e+00	0.0000000e+00	0.0000000e+00	0.0000000e+00	0.0000000e+00	0.0000000e+00	0.0000000e+00	0.0000000e+00	0.0000000e+00	0.0000000e+00	0.0000000e+00	0.0000000e+00	0.0000000e+00	0.0000000e+00	0.0000000e+00	0.0000000e+00	0.0000000e+00
32	0.0000000e+00	0.0000000e+00	0.0000000e+00	0.0000000e+00	0.0000000e+00	0.0000000e+00	0.0000000e+00	0.0000000e+00	0.0000000e+00	0.0000000e+00	0.0000000e+00	0.0000000e+00	0.0000000e+00	0.0000000e+00	0.0000000e+00	0.0000000e+00	0.0000000e+00	0.0000000e+00	0.0000000e+00	0.0000000e+00
33	0.0000000e+00	0.0000000e+00	0.0000000e+00	0.0000000e+00	0.0000000e+00	0.0000000e+00	0.0000000e+00	0.0000000e+00	0.0000000e+00	0.0000000e+00	0.0000000e+00	0.0000000e+00	0.0000000e+00	0.0000000e+00	0.0000000e+00	0.0000000e+00	0.0000000e+00	0.0000000e+00	0.0000000e+00	0.0000000e+00
34	0.0000000e+00	0.0000000e+00	0.0000000e+00	0.0000000e+00	0.0000000e+00	0.0000000e+00	0.0000000e+00	0.0000000e+00	0.0000000e+00	0.0000000e+00	0.0000000e+00	0.0000000e+00	0.0000000e+00	0.0000000e+00	0.0000000e+00	0.0000000e+00	0.0000000e+00	0.0000000e+00	0.0000000e+00	0.0000000e+00
35	0.0000000e+00	0.0000000e+00	0.0000000e+00	0.0000000e+00	0.0000000e+00	0.0000000e+00	0.0000000e+00	0.0000000e+00	0.0000000e+00	0.0000000e+00	0.0000000e+00	0.0000000e+00	0.0000000e+00	0.0000000e+00	0.0000000e+00	0.0000000e+00	0.0000000e+00	0.0000000e+00	0.0000000e+00	0.0000000e+00
36	0.0000000e+00	0.0000000e+00	0.0000000e+00	0.0000000e+00	0.0000000e+00	0.0000000e+00	0.0000000e+00	0.0000000e+00	0.0000000e+00	0.0000000e+00	0.0000000e+00	0.0000000e+00	0.0000000e+00	0.0000000e+00	0.0000000e+00	0.0000000e+00	0.0000000e+00	0.0000000e+00	0.0000000e+00	0.0000000e+00
37	0.0000000e+00	0.0000000e+00	0.0000000e+00	0.0000000e+00	0.0000000e+00	0.0000000e+00	0.0000000e+00	0.0000000e+00	0.0000000e+00	0.0000000e+00	0.0000000e+00	0.0000000e+00	0.0000000e+00	0.0000000e+00	0.0000000e+00	0.0000000e+00	0.0000000e+00	0.0000000e+00	0.0000000e+00	0.0000000e+00
38	9.1070672e-08	9.1650367e-08	9.2132666e-08	9.2553156e-08	2.2767698e-08	2.2912622e-08	2.3033197e-08	2.3138320e-08	5.6919250e-09	5.7281560e-09	5.7582997e-09	5.7845803e-09	1.4229812e-09	1.4320390e-09	1.4395749e-09	1.4461451e-09	3.5574531e-10	3.5800975e-10	3.5989373e-10	3.6153627e-10
39	3.2579030e-07	3.2793636e-07	3.2970462e-07	3.3124066e-07	8.1447807e-08	8.1984323e-08	8.2426390e-08	8.2810400e-08	2.0361955e-08	2.0496084e-08	2.0606600e-08	2.0702603e-08	5.0904887e-09	5.1240210e-09	5.1516501e-09	5.1756508e-09	1.2726222e-09	1.2810052e-09	1.2879125e-09	1.2939127e-09
40	7.5643714e-07	7.6160141e-07	7.6581711e-07	7.6945412e-07	1.8911020e-07	1.9040127e-07	1.9145520e-07	1.9236446e-07	4.7277562e-08	4.7600330e-08	4.7863813e-08	4.8091127e-08	1.1819391e-08	1.1900083e-08	1.1965953e-08	1.2022782e-08	2.9548476e-09	2.9750206e-09	2.9914883e-09	3.0056955e-09
41	1.4479693e-06	1.4582346e-06	1.4665296e-06	1.4736388e-06	3.6199500e-07	3.6456134e-07	3.6663512e-07	3.6841242e-07	9.0498785e-08	9.1140370e-08	9.1658816e-08	9.2103140e-08	2.2624697e-08	2.2785093e-08	2.2914704e-08	2.3025785e-08	5.6561741e-09	5.6962731e-09	5.7286760e-09	5.7564462e-09
42	2.4783744e-06	2.4966640e-06	2.5112826e-06	2.5237288e-06	6.1960019e-07	6.2417264e-07	6.2782733e-07	6.3093892e-07	1.5490013e-07	1.5604325e-07	1.5695692e-07	1.5773482e-07	3.8725034e-08	3.9010812e-08	3.9239230e-08	3.9433705e-08	9.6812584e-09	9.7527030e-09	9.8098075e-09	9.8584262e-09
43	3.9429814e-06	3.9733508e-06	3.9973689e-06	4.0176355e-06	9.8575985e-07	9.9335232e-07	9.9935695e-07	1.0044237e-06	2.4644015e-07	2.4833827e-07	2.4983943e-07	2.5110611e-07	6.1610039e-08	6.2084569e-08	6.2459859e-08	6.2776529e-08	1.5402510e-08	1.5521142e-08	1.5614965e-08	1.5694132e-08
44	5.9627088e-06	6.0107872e-06	6.0484019e-06	6.0798310e-06	1.4907068e-06	1.5027267e-06	1.5121305e-06	1.5199880e-06	3.7267709e-07	3.7568206e-07	3.7803303e-07	3.7999739e-07	9.3169275e-08	9.3920516e-08	9.4508258e-08	9.4999348e-08	2.3292319e-08	2.3480129e-08	2.3627064e-08	2.3749837e-08
45	8.6876573e-06	8.7612966e-06	8.8181883e-06	8.8652491e-06	2.1719715e-06	2.1903818e-06	2.2046051e-06	2.2163706e-06	5.4299362e-07	5.4759621e-07	5.5115205e-07	5.5409342e-07	1.3574841e-07	1.3689906e-07	1.3778801e-07	1.3852336e-07	3.3937101e-08	3.4224763e-08	3.4447003e-08	3.4630839e-08
46	1.2307934e-05	1.2418163e-05	1.2502029e-05	1.2570662e-05	3.0770894e-06	3.1046476e-06	3.1256148e-06	3.1427736e-06	7.6927375e-07	7.7616330e-07	7.8140513e-07	7.8569483e-07	1.9231844e-07	1.9404083e-07	1.9535129e-07	1.9642371e-07	4.8079610e-08	4.8510206e-08	4.8837821e-08	4.9105927e-08
47	1.7062862e-05	1.7225126e-05	1.7346427e-05	1.7444559e-05	4.2659057e-06	4.3064736e-06	4.3368001e-06	4.3613344e-06	1.0664789e-06	1.0766209e-06	1.0842026e-06	1.0903362e-06	2.6661974e-07	2.6915524e-07	2.7105066e-07	2.7258405e-07	6.6654934e-08	6.7288808e-08	6.7762662e-08	6.8146011e-08
48	2.3237168e-05	2.3472889e-05	2.3645720e-05	2.3783950e-05	5.8096247e-06	5.8685586e-06	5.9117689e-06	5.9463284e-06	1.4524106e-06	1.4671441e-06	1.4779467e-06	1.4865866e-06	3.6310266e-07	3.6678604e-07	3.6948669e-07	3.7164667e-07	9.0775661e-08	9.1696506e-08	9.2371670e-08	9.2911663e-08
49	3.1213558e-05	3.1552946e-05	3.1796623e-05	3.1989246e-05	7.8039607e-06	7.8888144e-06	7.9497383e-06	7.9978979e-06	1.9509977e-06	1.9722112e-06	1.9874423e-06	1.9994822e-06	4.8774945e-07	4.9305283e-07	4.9686059e-07	4.9987057e-07	1.2193736e-07	1.2326320e-07	1.2421514e-07	1.2496764e-07
50	4.1453006e-05	4.1938140e-05	4.2279234e-05	4.2545325e-05	1.0364217e-05	1.0485513e-05	1.0570795e-05	1.0637324e-05	2.5910670e-06	2.6213911e-06	2.6427117e-06	2.6593441e-06	6.4776679e-07	6.5534783e-07	6.6067798e-07	6.6483608e-07	1.6194169e-07	1.6383695e-07	1.6516949e-07	1.6620901e-07
51	5.4533719e-05	5.5223132e-05	5.5698494e-05	5.6063571e-05	1.3635041e-05	1.3807417e-05	1.3926273e-05	1.4017553e-05	3.4087816e-06	3.4518758e-06	3.4815899e-06	3.5044102e-06	8.5219548e-07	8.6296904e-07	8.7039756e-07	8.7610264e-07	2.1304886e-07	2.1574225e-07	2.1759938e-07	2.1902564e-07
52	7.1212069e-05	7.2187949e-05	7.2848964e-05	7.3347601e-05	1.7805684e-05	1.8049694e-05	1.8214975e-05	1.8339654e-05	4.4514561e-06	4.5124592e-06	4.5537797e-06	4.5849498e-06	1.1128642e-06	1.1281150e-06	1.1384451e-06	1.1462376e-06	2.7821601e-07	2.8202871e-07	2.8461124e-07	2.8655937e-07
53	9.2393048e-05	9.3769005e-05	9.4686775e-05	9.5365526e-05	2.3102638e-05	2.3446700e-05	2.3676190e-05	2.3845912e-05	5.7757170e-06	5.8617335e-06	5.9191067e-06	5.9615376e-06	1.4439295e-06	1.4654336e-06	1.4797769e-06	1.4903846e-06	3.6098233e-07	3.6635836e-07	3.6994418e-07	3.7259612e-07
54	1.1925119e-04	1.2118425e-04	1.2245833e-04	1.2338059e-04	2.9819934e-05	3.0303331e-05	3.0621935e-05	3.0852557e-05	7.4550775e-06	7.5759284e-06	7.6555805e-06	7.7132369e-06	1.8637697e-06	1.8939825e-06	1.9138955e-06	1.9283096e-06	4.6594237e-07	4.7349556e-07	4.7847381e-07	4.8207734e-07
55	1.5324337e-04	1.5594935e-04	1.5771827e-04	1.5897127e-04	3.8322428e-05	3.8999154e-05	3.9441532e-05	3.9754886e-05	9.5807594e-06	9.7499440e-06	9.8605406e-06	9.9388803e-06	2.3951904e-06	2.4374866e-06	2.4651358e-06	2.4847207e-06	5.9879751e-07	6.0937155e-07	6.1628384e-07	6.2118007e-07
56	1.9622166e-04	1.9999621e-04	2.0245300e-04	2.0415813e-04	4.9074153e-05	5.0018200e-05	5.0632661e-05	5.1059120e-05	1.2268785e-05	1.2504802e-05	1.2658421e-05	1.2765038e-05	3.0671972e-06	3.1262015e-06	3.1646062e-06	3.1912605e-06	7.6679914e-07	7.8155020e-07	7.9115137e-07	7.9781494e-07
57	2.5053675e-04	2.5578332e-04	2.5919831e-04	2.6152442e-04	6.2664422e-05	6.3976786e-05	6.4830999e-05	6.5412837e-05	1.5666503e-05	1.5994604e-05	1.6208164e-05	1.6353627e-05	3.9166274e-06	3.9986526e-06	4.0520425e-06	4.0884084e-06	9.7915659e-07	9.9966288e-07	1.0130104e-06	1.0221018e-06
58	3.1911528e-04	3.2638444e-04	3.3113298e-04	3.3431492e-04	7.9827513e-05	8.1646069e-05	8.2834028e-05	8.3630052e-05	1.9957519e-05	2.0412175e-05	2.0709176e-05	2.0908189e-05	4.9893824e-06	5.1030463e-06	5.1772965e-06	5.2270499e-06	1.2473452e-06	1.2757611e-06	1.2943237e-06	1.3067620e-06
59	4.0570336e-04	4.1574522e-04	4.2234734e-04	4.2671477e-04	1.0150418e-04	1.0401686e-04	1.0566885e-04	1.0676166e-04	2.5377078e-05	2.6005277e-05	2.6418294e-05	2.6691507e-05	6.3442735e-06	6.5013234e-06	6.6045776e-06	6.6728809e-06	1.5860677e-06	1.6253301e-06	1.6511437e-06	1.6682195e-06
60	5.1495878e-04	5.2878434e-04	5.3795674e-04	5.4396973e-04	1.2886564e-04	1.3232589e-04	1.3462157e-04	1.3612648e-04	3.2218068e-05	3.3083182e-05	3.3657136e-05	3.4033385e-05	8.0545235e-06	8.2708022e-06	8.4142908e-06	8.5083533e-06	2.0136298e-06	2.0676994e-06	2.1035715e-06	2.1270871e-06
61	6.5285398e-04	6.7182863e-04	6.8455754e-04	6.9285997e-04	1.6341593e-04	1.6816631e-04	1.7135309e-04	1.7343163e-04	4.0856651e-05	4.2044336e-05	4.2841091e-05	4.3360764e-05	1.0214173e-05	1.0511095e-05	1.0710284e-05	1.0840202e-05	2.5535415e-06	2.6277718e-06	2.6775690e-06	2.7100486e-06
62	8.2692303e-04	8.5288862e-04	8.7052455e-04	8.8202114e-04	2.0705627e-04	2.1355933e-04	2.1797633e-04	2.2085567e-04	5.1768359e-05	5.3394278e-05	5.4498635e-05	5.5218538e-05	1.2942106e-05	1.3348587e-05	1.3624676e-05	1.3804652e-05	3.2355237e-06	3.3371437e-06	3.4061661e-06	3.4511600e-06
63	1.0466508e-03	1.0820955e-03	1.1064914e-03	1.1224451e-03	2.6218636e-04	2.7106776e-04	2.7718086e-04	2.8117848e-04	6.5553500e-05	6.7774115e-05	6.9302577e-05	7.0302104e-05	1.6388402e-05	1.6943557e-05	1.7325673e-05	1.7575555e-05	4.0970959e-06	4.2358844e-06	4.3314133e-06	4.3938838e-06
64	1.3240963e-03	1.3723828e-03	1.4060742e-03	1.4282420e-03	3.3186727e-04	3.4397392e-04	3.5242160e-04	3.5797992e-04	8.2977953e-05	8.6005076e-05	8.8117324e-05	8.9507120e-05	2.0744532e-05	2.1501314e-05	2.2029378e-05	2.2376827e-05	5.1861255e-06	5.3753208e-06	5.5073364e-06	5.5941987e-06
65	1.6745758e-03	1.7402726e-03	1.7867046e-03	1.8175272e-03	4.2000342e-04	4.3648826e-04	4.4813986e-04	4.5587462e-04	1.0501882e-04	1.0914084e-04	1.1205431e-04	1.1398839e-04	2.6254776e-05	2.7285282e-05	2.8013654e-05	2.8497174e-05	6.5636820e-06	6.8213080e-06	7.0034005e-06	7.1242803e-06
66	2.1172468e-03	2.2065516e-03	2.2703949e-03	2.3132434e-03	5.3150596e-04	5.5393733e-04	5.6997456e-04	5.8073849e-04	1.3290553e-04	1.3851477e-04	1.4252509e-04	1.4521675e-04	3.3226496e-05	3.4628811e-05	3.5631394e-05	3.6304314e-05	8.3066046e-06	8.6571822e-06	8.9078274e-06	9.0760570e-06
67	2.6765448e-03	2.7979204e-03	2.8855141e-03	2.9450333e-03	6.7268306e-04	7.0320967e-04	7.2524196e-04	7.4021389e-04	1.6821778e-04	1.7585186e-04	1.8136171e-04	1.8510591e-04	4.2054630e-05	4.3963159e-05	4.5340627e-05	4.6276683e-05	1.0513626e-05	1.0990756e-05	1.1335122e-05	1.1569136e-05
68	3.3830527e-03	3.5480482e-03	3.6680027e-03	3.7505999e-03	8.5150434e-04	8.9307140e-04	9.2329440e-04	9.4410749e-04	2.1295236e-04	2.2334835e-04	2.3090721e-04	2.3611266e-04	5.3238387e-05	5.5837402e-05	5.7727130e-05	5.9028501e-05	1.3309546e-05	1.3959296e-05	1.4431726e-05	1.4757068e-05
69	4.2753770e-03	4.4998563e-03	4.6638662e-03	4.7783526e-03	1.0781510e-03	1.1348268e-03	1.1762396e-03	1.2051525e-03	2.6966174e-04	2.8383808e-04	2.9419676e-04	3.0142885e-04	6.7415919e-05	7.0960032e-05	7.3549726e-05	7.5357763e-05	1.6853896e-05	1.7739920e-05	1.8387340e-05	1.8839346e-05
70	5.4017511e-03	5.7075700e-03	5.9315735e-03	6.0899628e-03	1.3655454e-03	1.4429750e-03	1.4996952e-03	1.5398099e-03	3.4158832e-04	3.6095874e-04	3.7514843e-04	3.8518401e-04	8.5397870e-05	9.0240526e-05	9.3787986e-05	9.6296908e-05	2.1349332e-05	2.2559987e-05	2.3446846e-05	2.4074071e-05
71	6.8224271e-03	7.2398033e-03	7.5455222e-03	7.7641774e-03	1.7301631e-03	1.8362239e-03	1.9139165e-03	1.9694984e-03	4.3287056e-04	4.5940883e-04	4.7884895e-04	4.9275678e-04	1.0821893e-04	1.1485359e-04	1.1971368e-04	1.2319069e-04	2.7054511e-05	2.8713160e-05	2.9928173e-05	3.0797415e-05
72	8.6118055e-03	9.1825987e-03	9.5997195e-03	9.9008751e-03	2.1929081e-03	2.3386435e-03	2.4451454e-03	2.5220624e-03	5.4876678e-04	5.8524172e-04	6.1189723e-04	6.3114853e-04	1.3719381e-04	1.4631270e-04	1.5297670e-04	1.5778961e-04	3.4298089e-05	3.6577785e-05	3.8243764e-05	3.9446976e-05
73	1.0860427e-02	1.1642538e-02	1.2211536e-02	1.2625366e-02	2.7801537e-03	2.9810764e-03	3.1272422e-03	3.2335852e-03	6.9592388e-04	7.4622812e-04	7.8282295e-04	8.0944804e-04	1.7398443e-04	1.8656078e-04	1.9570970e-04	2.0236613e-04	4.3495513e-05	4.6639551e-05	4.8926744e-05	5.0590824e-05
74	1.3678804e-02	1.4751965e-02	1.5528242e-02	1.6095590e-02	3.5256147e-03	3.8035200e-03	4.0045112e-03	4.1514595e-03	8.8285977e-04	9.5246859e-04	1.0028118e-03	1.0396193e-03	2.2072064e-04	2.3812337e-04	2.5070953e-04	2.5991168e-04	5.5179181e-05	5.9529773e-05	6.2676251e-05	6.4976740e-05
75	1.7198582e-02	1.8671724e-02	1.9731061e-02	2.0507185e-02	4.4720371e-03	4.8574921e-03	5.1345944e-03	5.3376800e-03	1.1204099e-03	1.2170135e-03	1.2864604e-03	1.3373583e-03	2.8011188e-04	3.0426372e-04	3.2162612e-04	3.3435108e-04	7.0026354e-05	7.6064151e-05	8.0404636e-05	8.3585791e-05
76	2.1573757e-02	2.3594377e-02	2.5040262e-02	2.6099530e-02	5.6737335e-03	6.2095606e-03	6.5928329e-03	6.8736877e-03	1.4224020e-03	1.5567948e-03	1.6529228e-03	1.7233644e-03	3.5561606e-04	3.8921597e-04	4.1324918e-04	4.3086047e-04	8.8901340e-05	9.7301025e-05	1.0330912e-04	1.0771179e-04
77	2.6979058e-02	2.9745423e-02	3.1718683e-02	3.3160899e-02	7.1996246e-03	7.9459718e-03	8.4781199e-03	8.8670790e-03	1.8064862e-03	1.9938693e-03	2.1274710e-03	2.2251237e-03	4.5164738e-04	4.9849629e-04	5.3189892e-04	5.5631371e-04	1.1290740e-04	1.2461909e-04	1.3296937e-04	1.3907279e-04
78	3.3600660e-02	3.7376380e-02	4.0066771e-02	4.2024399e-02	9.1357499e-03	1.0177228e-02	1.0919061e-02	1.1458724e-02	2.2948765e-03	2.5567068e-03	2.7432019e-03	2.8788699e-03	5.7376215e-04	6.3922546e-04	6.8585332e-04	7.1977329e-04	1.4343314e-04	1.5979798e-04	1.7145425e-04	1.7993373e-04
79	4.1627044e-02	4.6758231e-02	5.0417471e-02	5.3065095e-02	1.1590264e-02	1.3046252e-02	1.4084365e-02	1.4835033e-02	2.9158001e-03	3.2824898e-03	3.5439354e-03	3.7329817e-03	7.2902189e-04	8.2070492e-04	8.8607389e-04	9.3334089e-04	1.8224312e-04	2.0516205e-04	2.2150300e-04	2.3331881e-04
80	5.1231439e-02	5.8165118e-02	6.3120615e-02	6.6685579e-02	1.4699037e-02	1.6738459e-02	1.8196148e-02	1.9243743e-02	3.7052392e-03	4.2200857e-03	4.5880779e-03	4.8525255e-03	9.2643026e-04	1.0551616e-03	1.1471738e-03	1.2132958e-03	2.3158686e-04	2.6376631e-04	2.8676693e-04	3.0329569e-04
81	6.2544495e-02	7.1845803e-02	7.8513208e-02	8.3286861e-02	1.8631386e-02	2.1493782e-02	2.3546520e-02	2.5014247e-02	4.7089488e-03	5.4338545e-03	5.9537296e-03	6.3254137e-03	1.1774399e-03	1.3587033e-03	1.4886986e-03	1.5816386e-03	2.9432513e-04	3.3963463e-04	3.7212889e-04	3.9536063e-04
82	7.5618666e-02	8.7982784e-02	9.6876534e-02	1.0322461e-01	2.3595286e-02	2.7620546e-02	3.0518565e-02	3.2584059e-02	5.9847525e-03	7.0085334e-03	7.7456596e-03	8.2709796e-03	1.4965308e-03	1.7525458e-03	1.9368777e-03	2.0682434e-03	3.7407379e-04	4.3806555e-04	4.8413988e-04	5.1697516e-04
83	9.0397736e-02	1.0665188e-01	1.1839142e-01	1.2676140e-01	2.9844857e-02	3.5515075e-02	3.9616486e-02	4.2536971e-02	7.6061524e-03	9.0567046e-03	1.0106041e-02	1.0853181e-02	1.9021201e-03	2.2648909e-03	2.5273215e-03	2.7141750e-03	4.7542998e-04	5.6609986e-04	6.3169092e-04	6.7839253e-04
84	1.0669341e-01	1.2778160e-01	1.4308946e-01	1.5400996e-01	3.7685418e-02	4.5681511e-02	5.1499793e-02	5.5647449e-02	9.6665557e-03	1.1728319e-02	1.3228828e-02	1.4298454e-02	2.4176330e-03	2.9333288e-03	3.3086428e-03	3.5761822e-03	6.0423736e-04	7.3311749e-04	8.2691389e-04	8.9377588e-04
85	1.2418332e-01	1.5113347e-01	1.7082385e-01	1.8489604e-01	4.7477594e-02	5.8755651e-02	6.7027604e-02	7.2939810e-02	1.2285449e-02	1.5224965e-02	1.7381702e-02	1.8923252e-02	3.0730709e-03	3.8084444e-03	4.3479945e-03	4.7336439e-03	7.6797396e-04	9.5173233e-04	1.0865570e-03	1.1829243e-03
86	1.4243239e-01	1.7630984e-01	2.0126922e-01	2.1915113e-01	5.9638218e-02	7.5532426e-02	8.7315471e-02	9.5766364e-02	1.5617699e-02	1.9822131e-02	2.2940977e-02	2.5178177e-02	3.9073859e-03	4.9594640e-03	5.7399028e-03	6.2997262e-03	9.7633735e-04	1.2391901e-03	1.4341747e-03	1.5740406e-03
87	1.6093054e-01	2.0277816e-01	2.3393812e-01	2.5632721e-01	7.4625389e-02	9.6977013e-02	1.1378376e-01	1.2588636e-01	1.9865457e-02	2.5900091e-02	3.0442786e-02	3.3714976e-02	4.9715488e-03	6.4821351e-03	7.6192813e-03	8.4383938e-03	1.2419957e-03	1.6193107e-03	1.9033441e-03	2.1079391e-03
88	1.7914328e-01	2.2992182e-01	2.6822630e-01	2.9584206e-01	9.2897121e-02	1.2420859e-01	1.4818300e-01	1.6552920e-01	2.5294274e-02	3.3991018e-02	4.0663337e-02	4.5493483e-02	6.3327613e-03	8.5108406e-03	1.0181966e-02	1.1391717e-02	1.5816092e-03	2.1254594e-03	2.5427169e-03	2.8447738e-03
89	1.9656727e-01	2.5710830e-01	3.0347755e-01	3.3704642e-01	1.1483857e-01	1.5844361e-01	1.9257372e-01	2.1741647e-01	3.2259612e-02	4.4858964e-02	5.4755221e-02	6.1965154e-02	8.0814677e-03	1.1239330e-02	1.3719851e-02	1.5527068e-02	2.0175171e-03	2.8056021e-03	3.4246215e-03	3.8756113e-03
90	2.1277435e-01	2.8374333e-01	3.3903962e-01	3.7928255e-01	1.4062486e-01	2.0082129e-01	2.4915477e-01	2.8461629e-01	4.1242208e-02	5.9621132e-02	7.4465103e-02	8.5374061e-02	1.0341006e-02	1.4952697e-02	1.8677797e-02	2.1415490e-02	2.5800099e-03	3.7300133e-03	4.6588599e-03	5.3414837e-03
91	2.2744252e-01	3.0930919e-01	3.7431024e-01	4.2193471e-01	1.7004451e-01	2.5209823e-01	3.1989635e-01	3.7016287e-01	5.2909577e-02	7.9956758e-02	1.0252010e-01	1.1930049e-01	1.3284818e-02	2.0083610e-02	2.5756396e-02	2.9975519e-02	3.3113142e-03	5.0046391e-03	6.4173315e-03	7.4679733e-03
92	2.4273492e-01	3.3779057e-01	4.1506319e-01	4.7223462e-01	2.0229847e-01	3.1216974e-01	4.0585044e-01	4.7625294e-01	6.8201972e-02	1.0843814e-01	1.4327305e-01	1.6960040e-01	1.7162230e-02	2.7305113e-02	3.6089376e-02	4.2729147e-02	4.2712911e-03	6.7925519e-03	8.9755895e-03	1.0625540e-02
93	2.6293203e-01	3.7830551e-01	4.7544531e-01	5.4851000e-01	2.3586962e-01	3.7951271e-01	5.0621615e-01	6.0303606e-01	8.8399083e-02	1.4895308e-01	2.0365516e-01	2.4587578e-01	2.2324966e-02	3.7661443e-02	5.1524103e-02	6.2226472e-02	5.5423395e-03	9.3422461e-03	1.2775568e-02	1.5425717e-02
94	2.8965912e-01	4.3652870e-01	5.6629035e-01	6.6630391e-01	2.6871103e-01	4.5105552e-01	6.1784367e-01	7.4777748e-01	1.1512617e-01	2.0717626e-01	2.9450020e-01	3.6366968e-01	2.9250797e-02	5.2748904e-02	7.5064917e-02	9.2750585e-02	7.2313826e-03	1.3021714e-02	1.8516605e-02	2.2869811e-02
95	3.2495644e-01	5.2072879e-01	7.0466637e-01	8.5105828e-01	3.0400835e-01	5.3525561e-01	7.5621969e-01	9.3253185e-01	1.5042350e-01	2.9137636e-01	4.3287623e-01	5.4842405e-01	3.8614652e-02	7.5085934e-02	1.1177401e-01	1.4176317e-01	9.4779154e-03	1.8380711e-02	2.7323682e-02	3.4628684e-02
96	3.7141044e-01	6.4310873e-01	9.1796833e-01	1.0000000e+00	3.5046235e-01	6.5763555e-01	9.6952165e-01	1.0000000e+00	1.9687749e-01	4.1375630e-01	6.4617818e-01	8.4269506e-01	5.1462805e-02	1.0893353e-01	1.7076864e-01	2.2315205e-01	1.2471178e-02	2.6266260e-02	4.1067789e-02	5.3590030e-02
97	4.3220183e-01	8.2128303e-01	1.0000000e+00	1.0000000e+00	4.1125374e-01	8.3580985e-01	1.0000000e+00	1.0000000e+00	2.5766888e-01	5.9193060e-01	9.7801961e-01	1.0000000e+00	6.9624823e-02	1.6216484e-01	2.6990949e-01	3.6500901e-01	1.6474835e-02	3.8000633e-02	6.2922518e-02	8.4861150e-02
98	4.8474183e-01	9.9360303e-01	1.0000000e+00	1.0000000e+00	4.6379374e-01	1.0000000e+00	1.0000000e+00	1.0000000e+00	3.1020888e-01	7.6425060e-01	1.0000000e+00	1.0000000e+00	9.7171685e-02	2.5251267e-01	4.5114519e-01	6.3511664e-01	2.1895979e-02	5.5780830e-02	9.8589189e-02	1.3801756e-01
99	5.2333683e-01	1.0000000e+00	1.0000000e+00	1.0000000e+00	5.0238874e-01	1.0000000e+00	1.0000000e+00	1.0000000e+00	3.4880388e-01	9.0646060e-01	1.0000000e+00	1.0000000e+00	1.3576669e-01	3.9472267e-01	7.6094019e-01	1.0000000e+00	2.9449522e-02	8.3613173e-02	1.5922009e-01	2.3261935e-01
100	5.5105183e-01	1.0000000e+00	1.0000000e+00	1.0000000e+00	5.3010374e-01	1.0000000e+00	1.0000000e+00	1.0000000e+00	3.7651888e-01	1.0000000e+00	1.0000000e+00	1.0000000e+00	1.6348169e-01	5.0958767e-01	1.0000000e+00	1.0000000e+00	4.0768433e-02	1.3052448e-01	2.7112477e-01	4.1652562e-01
101	5.7052183e-01	1.0000000e+00	1.0000000e+00	1.0000000e+00	5.4957374e-01	1.0000000e+00	1.0000000e+00	1.0000000e+00	3.9598888e-01	1.0000000e+00	1.0000000e+00	1.0000000e+00	1.8295169e-01	6.0022767e-01	1.0000000e+00	1.0000000e+00	6.0238433e-02	2.2116448e-01	5.0990977e-01	8.3271562e-01
102	5.8388683e-01	1.0000000e+00	1.0000000e+00	1.0000000e+00	5.6293874e-01	1.0000000e+00	1.0000000e+00	1.0000000e+00	4.0935388e-01	1.0000000e+00	1.0000000e+00	1.0000000e+00	1.9631669e-01	6.7006767e-01	1.0000000e+00	1.0000000e+00	7.3603433e-02	2.9100448e-01	7.1460477e-01	1.0000000e+00
103	5.9282683e-01	1.0000000e+00	1.0000000e+00	1.0000000e+00	5.7187874e-01	1.0000000e+00	1.0000000e+00	1.0000000e+00	4.1829388e-01	1.0000000e+00	1.0000000e+00	1.0000000e+00	2.0525669e-01	7.2260767e-01	1.0000000e+00	1.0000000e+00	8.2543433e-02	3.4354448e-01	8.8692477e-01	1.0000000e+00
104	5.9864183e-01	1.0000000e+00	1.0000000e+00	1.0000000e+00	5.7769374e-01	1.0000000e+00	1.0000000e+00	1.0000000e+00	4.2410888e-01	1.0000000e+00	1.0000000e+00	1.0000000e+00	2.1107169e-01	7.6120267e-01	1.0000000e+00	1.0000000e+00	8.8358433e-02	3.8213948e-01	1.0000000e+00	1.0000000e+00
105	6.0231183e-01	1.0000000e+00	1.0000000e+00	1.0000000e+00	5.8136374e-01	1.0000000e+00	1.0000000e+00	1.0000000e+00	4.2777888e-01	1.0000000e+00	1.0000000e+00	1.0000000e+00	2.1474169e-01	7.8891767e-01	1.0000000e+00	1.0000000e+00	9.2028433e-02	4.0985448e-01	1.0000000e+00	1.0000000e+00
106	6.0455183e-01	1.0000000e+00	1.0000000e+00	1.0000000e+00	5.8360374e-01	1.0000000e+00	1.0000000e+00	1.0000000e+00	4.3001888e-01	1.0000000e+00	1.0000000e+00	1.0000000e+00	2.1698169e-01	8.0838767e-01	1.0000000e+00	1.0000000e+00	9.4268433e-02	4.2932448e-01	1.0000000e+00	1.0000000e+00
107	6.0586683e-01	1.0000000e+00	1.0000000e+00	1.0000000e+00	5.8491874e-01	1.0000000e+00	1.0000000e+00	1.0000000e+00	4.3133388e-01	1.0000000e+00	1.0000000e+00	1.0000000e+00	2.1829669e-01	8.2175267e-01	1.0000000e+00	1.0000000e+00	9.5583433e-02	4.4268948e-01	1.0000000e+00	1.0000000e+00
108	6.0661183e-01	1.0000000e+00	1.0000000e+00	1.0000000e+00	5.8566374e-01	1.0000000e+00	1.0000000e+00	1.0000000e+00	4.3207888e-01	1.0000000e+00	1.0000000e+00	1.0000000e+00	2.1904169e-01	8.3069267e-01	1.0000000e+00	1.0000000e+00	9.6328433e-02	4.5162948e-01	1.0000000e+00	1.0000000e+00
109	6.0701183e-01	1.0000000e+00	1.0000000e+00	1.0000000e+00	5.8606374e-01	1.0000000e+00	1.0000000e+00	1.0000000e+00	4.3247888e-01	1.0000000e+00	1.0000000e+00	1.0000000e+00	2.1944169e-01	8.3650767e-01	1.0000000e+00	1.0000000e+00	9.6728433e-02	4.5744448e-01	1.0000000e+00	1.0000000e+00
110	6.0721683e-01	1.0000000e+00	1.0000000e+00	1.0000000e+00	5.8626874e-01	1.0000000e+00	1.0000000e+00	1.0000000e+00	4.3268388e-01	1.0000000e+00	1.0000000e+00	1.0000000e+00	2.1964669e-01	8.4017767e-01	1.0000000e+00	1.0000000e+00	9.6933433e-02	4.6111448e-01	1.0000000e+00	1.0000000e+00
111	6.0731683e-01	1.0000000e+00	1.0000000e+00	1.0000000e+00	5.8636874e-01	1.0000000e+00	1.0000000e+00	1.0000000e+00	4.3278388e-01	1.0000000e+00	1.0000000e+00	1.0000000e+00	2.1974669e-01	8.4241767e-01	1.0000000e+00	1.0000000e+00	9.7033433e-02	4.6335448e-01	1.0000000e+00	1.0000000e+00
112	6.0736183e-01	1.0000000e+00	1.0000000e+00	1.0000000e+00	5.8641374e-01	1.0000000e+00	1.0000000e+00	1.0000000e+00	4.3282888e-01	1.0000000e+00	1.0000000e+00	1.0000000e+00	2.1979169e-01	8.4373267e-01	1.0000000e+00	1.0000000e+00	9.7078433e-02	4.6466948e-01	1.0000000e+00	1.0000000e+00
113	6.0738183e-01	1.0000000e+00	1.0000000e+00	1.0000000e+00	5.8643374e-01	1.0000000e+00	1.0000000e+00	1.0000000e+00	4.3284888e-01	1.0000000e+00	1.0000000e+00	1.0000000e+00	2.1981169e-01	8.4447767e-01	1.0000000e+00	1.0000000e+00	9.7098433e-02	4.6541448e-01	1.0000000e+00	1.0000000e+00
114	6.0738683e-01	1.0000000e+00	1.0000000e+00	1.0000000e+00	5.8643874e-01	1.0000000e+00	1.0000000e+00	1.0000000e+00	4.3285388e-01	1.0000000e+00	1.0000000e+00	1.0000000e+00	2.1981669e-01	8.4487767e-01	1.0000000e+00	1.0000000e+00	9.7103433e-02	4.6581448e-01	1.0000000e+00	1.0000000e+00
115	6.0738683e-01	1.0000000e+00	1.0000000e+00	1.0000000e+00	5.8643874e-01	1.0000000e+00	1.0000000e+00	1.0000000e+00	4.3285388e-01	1.0000000e+00	1.0000000e+00	1.0000000e+00	2.1981669e-01	8.4508267e-01	1.0000000e+00	1.0000000e+00	9.7103433e-02	4.6601948e-01	1.0000000e+00	1.0000000e+00
116	6.0738683e-01	1.0000000e+00	1.0000000e+00	1.0000000e+00	5.8643874e-01	1.0000000e+00	1.0000000e+00	1.0000000e+00	4.3285388e-01	1.0000000e+00	1.0000000e+00	1.0000000e+00	2.1981669e-01	8.4518267e-01	1.0000000e+00	1.0000000e+00	9.7103433e-02	4.6611948e-01	1.0000000e+00	1.0000000e+00
117	6.0738683e-01	1.0000000e+00	1.0000000e+00	1.0000000e+00	5.8643874e-01	1.0000000e+00	1.0000000e+00	1.0000000e+00	4.3285388e-01	1.0000000e+00	1.0000000e+00	1.0000000e+00	2.1981669e-01	8.4522767e-01	1.0000000e+00	1.0000000e+00	9.7103433e-02	4.6616448e-01	1.0000000e+00	1.0000000e+00
118	6.0738683e-01	1.0000000e+00	1.0000000e+00	1.0000000e+00	5.8643874e-01	1.0000000e+00	1.0000000e+00	1.0000000e+00	4.3285388e-01	1.0000000e+00	1.0000000e+00	1.0000000e+00	2.1981669e-01	8.4524767e-01	1.0000000e+00	1.0000000e+00	9.7103433e-02	4.6618448e-01	1.0000000e+00	1.0000000e+00
119	6.0738683e-01	1.0000000e+00	1.0000000e+00	1.0000000e+00	5.8643874e-01	1.0000000e+00	1.0000000e+00	1.0000000e+00	4.3285388e-01	1.0000000e+00	1.0000000e+00	1.0000000e+00	2.1981669e-01	8.4525267e-01	1.0000000e+00	1.0000000e+00	9.7103433e-02	4.6618948e-01	1.0000000e+00	1.0000000e+00
120	6.0738683e-01	1.0000000e+00	1.0000000e+00	1.0000000e+00	5.8643874e-01	1.0000000e+00	1.0000000e+00	1.0000000e+00	4.3285388e-01	1.0000000e+00	1.0000000e+00	1.0000000e+00	2.1981669e-01	8.4525267e-01	1.0000000e+00	1.0000000e+00	9.7103433e-02	4.6618948e-01	1.0000000e+00	1.0000000e+00
