# Supplementary material for: Quantifying the Potential for Future Gene Therapy to Lower Lifetime Risk of Polygenic Late-Onset Diseases
Source: MDPI journal article supplement (doi:10.3390/ijms20133352), 2019-07-08
Supplement: s2 [file s2 › SuppFiles/Results/LODsCommonLow/BreastCancer/-1.000/FrailtyAnalysis.csv]

Age	Heritability	MeanOR	CaseOR	nControls	nCases	nCumIncidence	nIncidence	nLifeIncidence0	nAbsIncidence0	nLifeIncidence5	nAbsIncidence5	nLifeIncidence10	nAbsIncidence10	nLifeIncidence15	nAbsIncidence15	nIncActDivExp
26	0.129674	0.617959	0.831558	999995749	4251	4.251e-06	4.251e-06	4.20547e-06	4.20547e-06	4.2147e-06	4.2147e-06	4.22035e-06	4.22035e-06	4.22269e-06	4.22269e-06	0.349767
27	0.129675	0.617956	0.829443	999978645	17104	2.1355e-05	1.71041e-05	2.11174e-05	1.69119e-05	2.11663e-05	1.69516e-05	2.11978e-05	1.69774e-05	2.12112e-05	1.69885e-05	0.350844
28	0.129677	0.61795	0.82693	999947762	30883	5.2238e-05	3.08837e-05	5.16366e-05	3.05192e-05	5.17618e-05	3.05955e-05	5.18451e-05	3.06474e-05	5.18833e-05	3.06721e-05	0.350543
29	0.12968	0.617942	0.829088	999901272	46490	9.8728e-05	4.64924e-05	9.75524e-05	4.59158e-05	9.77985e-05	4.60367e-05	9.79679e-05	4.61227e-05	9.80511e-05	4.61678e-05	0.356497
30	0.129683	0.61793	0.825178	999839074	62198	0.000160926	6.22041e-05	0.000158945	6.13925e-05	0.000159361	6.15623e-05	0.000159656	6.1688e-05	0.00015981	6.17589e-05	0.353611
31	0.129688	0.617916	0.828132	999759975	79099	0.000240025	7.91117e-05	0.000236969	7.8024e-05	0.000237613	7.82518e-05	0.000238079	7.84235e-05	0.000238339	7.85287e-05	0.351872
32	0.129693	0.617898	0.829395	999661632	98343	0.000338368	9.83666e-05	0.000333911	9.69416e-05	0.000334851	9.72386e-05	0.000335546	9.74668e-05	0.000335954	9.76153e-05	0.354561
33	0.1297	0.617877	0.826435	999544036	117596	0.000455964	0.000117636	0.000449749	0.000115838	0.000451062	0.000116211	0.000452047	0.000116501	0.000452653	0.000116699	0.352213
34	0.129708	0.617852	0.827104	999404503	139533	0.000595497	0.000139597	0.000587092	0.000137344	0.000588872	0.00013781	0.00059022	0.000138173	0.000591083	0.000138431	0.353583
35	0.129717	0.617822	0.826658	999240761	163742	0.000759239	0.00016384	0.000748134	0.000161042	0.000750493	0.000161622	0.000752288	0.000162069	0.000753483	0.000162399	0.35602
36	0.129728	0.617789	0.826375	999052143	188618	0.000947857	0.000188761	0.000933482	0.000185347	0.000936548	0.000186055	0.000938886	0.000186598	0.00094049	0.000187007	0.355812
37	0.12974	0.61775	0.825964	998836349	215794	0.00116365	0.000215999	0.00114534	0.000211856	0.00114927	0.000212719	0.00115226	0.000213371	0.00115436	0.000213871	0.356368
38	0.129754	0.617705	0.826929	998590680	245669	0.00140932	0.000245955	0.00138628	0.000240942	0.00139126	0.000241996	0.00139503	0.000242775	0.00139774	0.000243382	0.357803
39	0.12977	0.617655	0.827737	998313832	276848	0.00168617	0.000277239	0.00165751	0.000271228	0.00166377	0.000272504	0.00166846	0.000273429	0.00167189	0.000274149	0.357814
40	0.129788	0.617599	0.826946	998001222	312610	0.00199878	0.000313138	0.00196342	0.000305908	0.00197122	0.000307455	0.00197702	0.000308562	0.00198131	0.000309415	0.360426
41	0.129808	0.617536	0.826923	997651583	349639	0.00234842	0.000350339	0.00230513	0.00034172	0.0023148	0.000343576	0.00232191	0.000344887	0.0023272	0.000345894	0.361228
42	0.12983	0.617465	0.827238	997261425	390158	0.00273858	0.000391076	0.00268594	0.00038081	0.00269784	0.000383038	0.00270651	0.000384598	0.00271298	0.000385777	0.362605
43	0.129855	0.617387	0.827	996827477	433948	0.00317252	0.00043514	0.00310888	0.000422939	0.00312344	0.000425599	0.00313397	0.00042746	0.00314181	0.000428836	0.364024
44	0.129882	0.6173	0.826599	996346794	480683	0.00365321	0.000482213	0.00357664	0.000467757	0.00359436	0.000470925	0.00360711	0.000473141	0.00361656	0.000474747	0.365038
45	0.129913	0.617203	0.826941	995813906	532888	0.00418609	0.000534842	0.00409432	0.000517679	0.00411582	0.000521463	0.00413121	0.000524101	0.00414255	0.000525987	0.367317
46	0.129946	0.617096	0.827744	995225127	588779	0.00477487	0.000591254	0.00466524	0.000570915	0.00469127	0.000575443	0.00470978	0.00057857	0.00472333	0.000580777	0.369227
47	0.129983	0.616978	0.827264	994576550	648577	0.00542345	0.000651689	0.00529287	0.000627634	0.0053243	0.000633037	0.00534652	0.00063674	0.00536266	0.000639335	0.370803
48	0.130024	0.616848	0.827016	993861673	714877	0.00613833	0.000718775	0.00598315	0.000690278	0.00602104	0.000696741	0.00604764	0.000701123	0.00606685	0.00070419	0.373304
49	0.130069	0.616705	0.826837	993074761	786912	0.00692524	0.000791772	0.00674116	0.000758009	0.0067868	0.000765752	0.00681858	0.000770938	0.00684141	0.000774565	0.375959
50	0.130119	0.616547	0.827153	992210172	864589	0.00778983	0.000870618	0.00757178	0.000830628	0.00762671	0.000839914	0.00766463	0.000846052	0.00769175	0.000850332	0.378502
51	0.130173	0.616375	0.826039	991262848	947324	0.00873715	0.000954761	0.00847926	0.00090748	0.00854529	0.000918582	0.0085905	0.000925867	0.00862264	0.000930897	0.380545
52	0.130233	0.616185	0.82676	990225468	1037380	0.00977453	0.00104652	0.00946984	0.000990573	0.00954917	0.00100388	0.00960302	0.00101252	0.00964109	0.00101845	0.382864
53	0.130294	0.615989	0.826337	989153719	1071749	0.0108463	0.00108233	0.0104897	0.00101982	0.010584	0.00103487	0.0106476	0.00104456	0.0106922	0.00105113	0.386008
54	0.130358	0.615788	0.82671	988054499	1099220	0.0119455	0.00111127	0.0115317	0.00104199	0.0116429	0.00105885	0.0117172	0.00106966	0.0117691	0.00107691	0.388829
55	0.130423	0.61558	0.826263	986925220	1129279	0.0130748	0.00114293	0.0125978	0.0010661	0.0127278	0.00108492	0.0128143	0.00109705	0.0128742	0.00110507	0.392477
56	0.130489	0.615368	0.826229	985770772	1154448	0.0142292	0.00116974	0.0136828	0.00108503	0.0138337	0.00110589	0.0139337	0.00111942	0.0140025	0.0011283	0.394357
57	0.130558	0.615151	0.82601	984588301	1182471	0.0154117	0.00119954	0.0147889	0.00110607	0.0149628	0.00112912	0.015078	0.00114429	0.0151566	0.00115414	0.397159
58	0.130628	0.614928	0.825705	983375780	1212521	0.0166242	0.0012315	0.0159172	0.00112834	0.0161166	0.00115377	0.0162488	0.0011708	0.0163384	0.00118176	0.400566
59	0.1307	0.614698	0.825637	982133340	1242440	0.0178667	0.00126344	0.017067	0.00114978	0.0172944	0.00117776	0.0174456	0.00119681	0.0175474	0.00120903	0.40385
60	0.130773	0.614464	0.82542	980862762	1270578	0.0191372	0.00129369	0.0182359	0.00116889	0.0184938	0.00119949	0.0186663	0.00122067	0.0187817	0.00123432	0.406489
61	0.130849	0.614223	0.82591	979564437	1298325	0.0204356	0.00132366	0.0194228	0.00118693	0.0197141	0.00122026	0.01991	0.00124372	0.0200407	0.00125893	0.408952
62	0.130926	0.613976	0.825415	978235137	1329300	0.0217649	0.00135703	0.0206299	0.00120712	0.0209575	0.00124341	0.0211793	0.00126932	0.021327	0.00128638	0.412371
63	0.131005	0.613724	0.825218	976874775	1360362	0.0231252	0.00139063	0.0218564	0.00122646	0.0222234	0.00126591	0.0224738	0.00129445	0.0226406	0.00131355	0.415746
64	0.131086	0.613465	0.825168	975486525	1388250	0.0245135	0.00142111	0.0230983	0.00124194	0.0235081	0.00128471	0.0237897	0.00131598	0.0239779	0.00133726	0.418098
65	0.131169	0.613201	0.82436	974066366	1420159	0.0259336	0.00145585	0.0243582	0.00125989	0.0248146	0.0013065	0.0251304	0.0013407	0.0253422	0.00136438	0.421606
66	0.131254	0.61293	0.824355	972616535	1449831	0.0273835	0.00148843	0.0256328	0.0012746	0.0261401	0.00132544	0.0264931	0.00136265	0.0267311	0.00138885	0.424393
67	0.13134	0.612653	0.824819	971134912	1481623	0.0288651	0.00152334	0.0269226	0.00128974	0.0274855	0.00134545	0.027879	0.0013859	0.0281459	0.00141477	0.427748
68	0.131429	0.612369	0.824125	969622015	1512897	0.030378	0.00155786	0.0282254	0.00130282	0.0288495	0.00136398	0.0292869	0.00140786	0.0295855	0.0014396	0.430897
69	0.13152	0.612079	0.824567	968077297	1544718	0.0319227	0.00159311	0.02954	0.00131459	0.0302314	0.00138192	0.0307164	0.00142951	0.0310498	0.0014643	0.43415
70	0.131612	0.611783	0.823391	966501412	1575885	0.0334986	0.00162785	0.0308638	0.00132384	0.0316295	0.00139805	0.0321661	0.00144977	0.0325375	0.00148771	0.437171
71	0.131707	0.611479	0.823725	964892273	1609139	0.0351077	0.00166491	0.0321965	0.00133266	0.0330441	0.00141466	0.0336372	0.00147107	0.0340499	0.00151238	0.440721
72	0.131803	0.61117	0.82344	963253800	1638473	0.0367462	0.00169809	0.0335322	0.00133577	0.0344704	0.00142627	0.0351251	0.00148788	0.0355825	0.00153261	0.443157
73	0.131902	0.610852	0.823978	961580722	1673078	0.0384193	0.0017369	0.0348726	0.00134042	0.0359112	0.00144075	0.0366335	0.0015084	0.0371394	0.00155692	0.446976
74	0.132003	0.610528	0.82321	959874212	1706510	0.0401258	0.00177469	0.0362138	0.00134116	0.0373634	0.00145227	0.0381601	0.00152666	0.0387186	0.00157924	0.45043
75	0.132107	0.610197	0.82323	958133722	1740490	0.0418663	0.00181325	0.0375531	0.00133925	0.0388256	0.00146212	0.0397042	0.00154408	0.0403198	0.0016012	0.453982
76	0.132212	0.609859	0.823179	956361663	1772059	0.0436383	0.00184949	0.0388853	0.00133227	0.0402931	0.00146758	0.0412621	0.00155789	0.0419398	0.00162002	0.456867
77	0.13232	0.609513	0.823203	954557728	1803935	0.0454423	0.00188625	0.0402072	0.00132192	0.0417638	0.00147066	0.0428324	0.00157031	0.043578	0.00163814	0.459802
78	0.132429	0.60916	0.822672	952716454	1841274	0.0472835	0.00192893	0.0415187	0.00131145	0.043239	0.00147517	0.044418	0.00158559	0.045238	0.00166004	0.464086
79	0.132541	0.608799	0.822307	950839723	1876731	0.0491603	0.00196987	0.0428138	0.00129509	0.0447139	0.00147494	0.0460151	0.00159714	0.0469169	0.00167894	0.467848
80	0.132656	0.608431	0.822177	948930339	1909384	0.0510697	0.0020081	0.0440858	0.00127205	0.0461831	0.00146921	0.0476191	0.001604	0.0486109	0.00169391	0.470877
81	0.132772	0.608055	0.822195	946987416	1942923	0.0530126	0.00204749	0.0453305	0.00124462	0.0476439	0.00146073	0.0492282	0.00160909	0.050319	0.0017081	0.474098
82	0.132891	0.607672	0.821917	945007726	1979690	0.0549923	0.00209051	0.0465441	0.00121363	0.0490946	0.00145072	0.0508422	0.00161394	0.0520423	0.0017233	0.478072
83	0.133013	0.60728	0.821606	942990980	2016746	0.057009	0.00213411	0.0477209	0.00117677	0.050531	0.00143643	0.0524579	0.00161576	0.053779	0.0017367	0.482077
84	0.133136	0.606881	0.820922	940940460	2050520	0.0590595	0.00217449	0.048853	0.00113215	0.051946	0.00141502	0.0540695	0.00161152	0.055524	0.00174503	0.485268
85	0.133263	0.606473	0.821145	938851689	2088771	0.0611483	0.00221988	0.0499374	0.00108434	0.0533376	0.00139156	0.0556767	0.00160725	0.0572787	0.00175469	0.489488
86	0.133392	0.606057	0.821304	936730957	2120732	0.063269	0.00225886	0.0509652	0.00102786	0.0546961	0.00135852	0.0572711	0.00159441	0.059035	0.00175635	0.492212
87	0.133523	0.605633	0.820696	934573013	2157944	0.065427	0.0023037	0.0519339	0.000968679	0.056019	0.00132291	0.0588525	0.00158134	0.0607943	0.00175926	0.496134
88	0.133657	0.6052	0.820721	932379240	2193773	0.0676208	0.00234735	0.0528375	0.000903637	0.0572991	0.00128007	0.060415	0.00156251	0.0625519	0.00175759	0.499713
89	0.133793	0.604758	0.820377	930146347	2232893	0.0698537	0.00239483	0.0536725	0.000834968	0.0585319	0.00123285	0.0619558	0.00154087	0.0643067	0.00175485	0.504016
90	0.133932	0.604308	0.819793	927879220	2267127	0.0721208	0.00243739	0.0544327	0.00076019	0.0597089	0.00117693	0.0634662	0.00151038	0.0660512	0.00174449	0.507197
91	0.134073	0.60385	0.81942	925573854	2305366	0.0744261	0.00248455	0.0551162	0.000683541	0.0608262	0.00111734	0.064943	0.00147679	0.0677844	0.00173322	0.511257
92	0.134217	0.603383	0.819274	923232932	2340922	0.0767671	0.00252916	0.0557204	0.000604215	0.061877	0.00105082	0.0663781	0.00143508	0.0694999	0.00171543	0.514705
93	0.134364	0.602906	0.819255	920852341	2380591	0.0791477	0.00257854	0.0562461	0.000525706	0.0628576	0.000980589	0.0677672	0.00138907	0.0711954	0.00169558	0.51904
94	0.134514	0.60242	0.818741	918430154	2422187	0.0815698	0.00263038	0.0566951	0.000448977	0.0637634	0.000905753	0.0691045	0.00133736	0.0728669	0.0016715	0.52377
95	0.134666	0.601926	0.818421	915975090	2455064	0.0840249	0.00267311	0.0570693	0.000374152	0.0645866	0.000823208	0.070379	0.0012745	0.0745025	0.00163559	0.526607
96	0.134821	0.601421	0.818009	913478573	2496517	0.0865214	0.00272553	0.0573751	0.000305823	0.0653268	0.000740217	0.071589	0.00120999	0.0761018	0.00159924	0.531272
97	0.134979	0.600907	0.817876	910946022	2532551	0.089054	0.00277243	0.0576187	0.000243631	0.0659805	0.000653677	0.0727259	0.00113684	0.0776543	0.00155256	0.534773
98	0.13514	0.600384	0.817817	908376272	2569750	0.0916237	0.00282097	0.0578083	0.000189596	0.0665479	0.000567478	0.0737844	0.00105851	0.0791538	0.00149945	0.538517
99	0.135304	0.59985	0.817319	905766823	2609449	0.0942332	0.00287265	0.0579525	0.000144172	0.0670316	0.000483687	0.0747601	0.000975777	0.0805945	0.00144076	0.542778
100	0.13547	0.599306	0.817113	903116223	2650600	0.0968838	0.00292636	0.0580597	0.000107164	0.0674356	0.000403951	0.0756489	0.000888773	0.0819705	0.00137601	0.547331
101	0.13564	0.598752	0.816957	900425839	2690384	0.0995742	0.002979	0.0581375	7.78328e-05	0.0677651	0.000329572	0.0764466	0.000797699	0.0832745	0.00130395	0.551595
102	0.135812	0.598188	0.816276	897696456	2729383	0.102304	0.00303121	0.0581927	5.51608e-05	0.0680277	0.000262567	0.0771511	0.000704481	0.0844997	0.00122519	0.555697
103	0.135987	0.597613	0.816244	894926263	2770193	0.105074	0.00308589	0.0582307	3.80902e-05	0.0682321	0.000204385	0.0777628	0.000611742	0.0856408	0.00114107	0.560165
104	0.136165	0.597028	0.815708	892121046	2805217	0.107879	0.00313458	0.0582562	2.54994e-05	0.0683871	0.000154988	0.0782828	0.000519975	0.0866897	0.00104898	0.563469
105	0.136347	0.596433	0.815477	889276871	2844175	0.110723	0.0031881	0.0582728	1.65815e-05	0.0685021	0.00011499	0.0787163	0.000433452	0.0876434	0.00095368	0.567571
106	0.136531	0.595827	0.81541	886391985	2884886	0.113608	0.00324408	0.0582832	1.04144e-05	0.0685855	8.34598e-05	0.0790697	0.000353399	0.0884988	0.000855369	0.572027
107	0.136719	0.595209	0.814852	883463212	2928773	0.116537	0.00330415	0.0582895	6.29686e-06	0.0686447	5.91905e-05	0.0793514	0.000281748	0.0892547	0.000755946	0.577114
108	0.13691	0.59458	0.814509	880495504	2967708	0.119504	0.00335918	0.0582932	3.65028e-06	0.0686855	4.0806e-05	0.0795704	0.000218957	0.0899101	0.000655359	0.581233
109	0.137104	0.59394	0.814054	877488546	3006958	0.122511	0.00341507	0.0582952	2.01466e-06	0.0687129	2.73332e-05	0.0797365	0.000166134	0.0904675	0.00055737	0.585425
110	0.137301	0.593289	0.813693	874443605	3044941	0.125556	0.00347006	0.0582963	1.06573e-06	0.0687306	1.7752e-05	0.0798596	0.000123107	0.0909315	0.000464049	0.589385
111	0.137502	0.592626	0.813626	871356959	3086646	0.128643	0.00352984	0.0582968	5.2473e-07	0.0687418	1.11428e-05	0.0799489	8.92967e-05	0.0913096	0.000378114	0.594079
112	0.137706	0.591951	0.813119	868229301	3127658	0.131771	0.00358941	0.058297	2.50213e-07	0.0687485	6.72446e-06	0.0800121	6.321e-05	0.0916105	0.000300881	0.598654
113	0.137914	0.591265	0.812545	865061598	3167703	0.134938	0.00364846	0.0582971	9.50311e-08	0.0687524	3.89627e-06	0.0800557	4.35559e-05	0.0918442	0.000233713	0.603062
114	0.138124	0.590566	0.812107	861851561	3210037	0.138148	0.00371076	0.0582972	3.21004e-08	0.0687545	2.15072e-06	0.0800849	2.91792e-05	0.0920216	0.000177355	0.607923
115	0.138339	0.589855	0.811836	858600772	3250789	0.141399	0.00377187	0.0582972	0	0.0687557	1.13778e-06	0.0801038	1.89521e-05	0.092153	0.000131429	0.612505
116	0.138556	0.589132	0.811375	855309424	3291348	0.144691	0.00383339	0.0582972	0	0.0687562	5.59529e-07	0.0801157	1.18818e-05	0.0922482	9.52187e-05	0.617074
117	0.138777	0.588395	0.811107	851976412	3333012	0.148024	0.00389685	0.0582972	0	0.0687565	2.66641e-07	0.0801229	7.16598e-06	0.0923156	6.73602e-05	0.621874
118	0.139002	0.587648	0.810554	848608239	3368173	0.151392	0.00395336	0.0582972	0	0.0687566	1.01045e-07	0.080127	4.14285e-06	0.0923619	4.63124e-05	0.625493
119	0.13923	0.586886	0.810343	845197924	3410315	0.154802	0.00401872	0.0582972	0	0.0687566	3.41031e-08	0.0801293	2.28491e-06	0.0923929	3.09998e-05	0.630436
120	0.139461	0.586112	0.80939	841740937	3456987	0.158259	0.00409015	0.0582972	0	0.0687566	0	0.0801305	1.20995e-06	0.092413	2.01542e-05	0.636243
