# Supplementary material for: Quantifying the Potential for Future Gene Therapy to Lower Lifetime Risk of Polygenic Late-Onset Diseases
Source: MDPI journal article supplement (doi:10.3390/ijms20133352), 2019-07-08
Supplement: s2 [file s2 › SuppFiles/Results/LODsCommonLow/BreastCancer/-1.000/IndividualsByBetaDistrib.csv]

nEntry	Beta	nDetrimentalCount	nFractionPopulation	nCumulativeFractionPopulation	nEditsNeeded	nIndividuals
0	-19.8	0	0	1	0	0
1	-19.6	0	0	1	0	0
2	-19.4	0	0	1	0	0
3	-19.2	0	0	1	0	0
4	-19	0	0	1	0	0
5	-18.8	0	0	1	0	0
6	-18.6	0	0	1	0	0
7	-18.4	0	0	1	0	0
8	-18.2	0	0	1	0	0
9	-18	0	0	1	0	0
10	-17.8	0	0	1	0	0
11	-17.6	0	0	1	0	0
12	-17.4	0	0	1	0	0
13	-17.2	0	0	1	0	0
14	-17	0	0	1	0	0
15	-16.8	0	0	1	0	0
16	-16.6	0	0	1	0	0
17	-16.4	0	0	1	0	0
18	-16.2	0	0	1	0	0
19	-16	0	0	1	0	0
20	-15.8	0	0	1	0	0
21	-15.6	0	0	1	0	0
22	-15.4	0	0	1	0	0
23	-15.2	0	0	1	0	0
24	-15	0	0	1	0	0
25	-14.8	0	0	1	0	0
26	-14.6	0	0	1	0	0
27	-14.4	0	0	1	0	0
28	-14.2	0	0	1	0	0
29	-14	0	0	1	0	0
30	-13.8	0	0	1	0	0
31	-13.6	0	0	1	0	0
32	-13.4	0	0	1	0	0
33	-13.2	0	0	1	0	0
34	-13	0	0	1	0	0
35	-12.8	0	0	1	0	0
36	-12.6	0	0	1	0	0
37	-12.4	0	0	1	0	0
38	-12.2	0	0	1	0	0
39	-12	0	0	1	0	0
40	-11.8	0	0	1	0	0
41	-11.6	0	0	1	0	0
42	-11.4	0	0	1	0	0
43	-11.2	0	0	1	0	0
44	-11	0	0	1	0	0
45	-10.8	0	0	1	0	0
46	-10.6	0	0	1	0	0
47	-10.4	0	0	1	0	0
48	-10.2	0	0	1	0	0
49	-10	0	0	1	0	0
50	-9.8	0	0	1	0	0
51	-9.6	0	0	1	0	0
52	-9.4	0	0	1	0	0
53	-9.2	0	0	1	0	0
54	-9	0	0	1	0	0
55	-8.8	0	0	1	0	0
56	-8.6	0	0	1	0	0
57	-8.4	0	0	1	0	0
58	-8.2	0	0	1	0	0
59	-8	0	0	1	0	0
60	-7.8	0	0	1	0	0
61	-7.6	0	0	1	0	0
62	-7.4	0	0	1	0	0
63	-7.2	0	0	1	0	0
64	-7	160	2e-09	1	0	2
65	-6.8	164.17	6e-09	1	0	6
66	-6.6	168.13	1.6e-08	0.99999999	0	16
67	-6.4	169.34	3.5e-08	0.99999998	0	35
68	-6.2	170.73	9.1e-08	0.99999994	0	91
69	-6	173.36	2.39e-07	0.99999985	0	239
70	-5.8	174.97	5.89e-07	0.99999961	0	589
71	-5.6	177.15	1.324e-06	0.99999902	0	1324
72	-5.4	178.77	2.912e-06	0.9999977	0	2912
73	-5.2	180.69	6.024e-06	0.99999479	0	6024
74	-5	182.59	1.2836e-05	0.99998876	0	12836
75	-4.8	184.53	2.5979e-05	0.99997593	0	25979
76	-4.6	186.44	5.0642e-05	0.99994995	0	50642
77	-4.4	188.34	9.5844e-05	0.99989931	0	95844
78	-4.2	190.24	0.000176091	0.99980346	0	176091
79	-4	192.16	0.000315094	0.99962737	0	315094
80	-3.8	194.07	0.000544076	0.99931228	0	544076
81	-3.6	195.98	0.000910638	0.9987682	0	910638
82	-3.4	197.88	0.0014805	0.99785756	0	1480500
83	-3.2	199.78	0.002333941	0.99637706	0	2333941
84	-3	201.68	0.003571856	0.99404312	0	3571856
85	-2.8	203.58	0.005301807	0.99047127	0	5301807
86	-2.6	205.48	0.007654017	0.98516946	0	7654017
87	-2.4	207.38	0.010710384	0.97751544	0	10710384
88	-2.2	209.27	0.014586379	0.96680506	0	14586379
89	-2	211.17	0.019257136	0.95221868	0	19257136
90	-1.8	213.06	0.024734933	0.93296154	0	24734933
91	-1.6	214.96	0.030852098	0.90822661	0	30852098
92	-1.4	216.85	0.037402836	0.87737451	0	37402836
93	-1.2	218.74	0.044060672	0.83997168	0	44060672
94	-1	220.63	0.05050685	0.795911	0	50506850
95	-0.8	222.52	0.056271369	0.74540415	0	56271369
96	-0.6	224.41	0.060975363	0.68913278	0	60975363
97	-0.4	226.3	0.064246719	0.62815742	0	64246719
98	-0.2	228.19	0.0658901	0.5639107	0	65890100
99	0	230.08	0.065720915	0.4980206	0	65720915
100	0.2	231.96	0.063776087	0.43229969	1.887	63776087
101	0.4	233.85	0.060256355	0.3685236	3.7725	60256355
102	0.6	235.73	0.055404035	0.30826725	5.6579	55404035
103	0.8	237.62	0.049588907	0.25286321	7.5434	49588907
104	1	239.5	0.043222269	0.2032743	9.4279	43222269
105	1.2	241.39	0.036663513	0.16005203	11.312	36663513
106	1.4	243.27	0.030297144	0.12338852	13.194	30297144
107	1.6	245.15	0.024378517	0.093091377	15.076	24378517
108	1.8	247.04	0.019108925	0.06871286	16.959	19108925
109	2	248.92	0.0145912	0.049603935	18.841	14591200
110	2.2	250.8	0.010861992	0.035012735	20.723	10861992
111	2.4	252.68	0.007864391	0.024150743	22.601	7864391
112	2.6	254.56	0.005555316	0.016286352	24.483	5555316
113	2.8	256.44	0.003821387	0.010731036	26.365	3821387
114	3	258.32	0.002562285	0.006909649	28.242	2562285
115	3.2	260.2	0.001675428	0.004347364	30.119	1675428
116	3.4	262.08	0.001070475	0.002671936	32.001	1070475
117	3.6	263.96	0.000663062	0.001601461	33.885	663062
118	3.8	265.83	0.000401146	0.000938399	35.758	401146
119	4	267.71	0.000237352	0.000537253	37.632	237352
120	4.2	269.57	0.000136425	0.000299901	39.492	136425
121	4.4	271.46	7.6506e-05	0.000163476	41.388	76506
122	4.6	273.35	4.1693e-05	8.697e-05	43.274	41693
123	4.8	275.2	2.2355e-05	4.5277e-05	45.12	22355
124	5	277.08	1.1466e-05	2.2922e-05	46.999	11466
125	5.2	278.9	6.004e-06	1.1456e-05	48.827	6004
126	5.4	280.7	2.878e-06	5.452e-06	50.627	2878
127	5.6	282.94	1.434e-06	2.574e-06	52.859	1434
128	5.8	284.48	6.08e-07	1.14e-06	54.408	608
129	6	286.47	2.97e-07	5.32e-07	56.399	297
130	6.2	288.55	1.3e-07	2.35e-07	58.478	130
131	6.4	290.2	6.6e-08	1.05e-07	60.121	66
132	6.6	293.08	2.4e-08	3.9e-08	63.008	24
133	6.8	296.3	1e-08	1.5e-08	66.224	10
134	7	298.5	2e-09	5e-09	68.424	2
135	7.2	297.5	2e-09	3e-09	67.424	2
136	7.4	0	0	1e-09	0	0
137	7.6	295	1e-09	1e-09	64.924	1
138	7.8	0	0	0	0	0
139	8	0	0	0	0	0
140	8.2	0	0	0	0	0
141	8.4	0	0	0	0	0
142	8.6	0	0	0	0	0
143	8.8	0	0	0	0	0
144	9	0	0	0	0	0
145	9.2	0	0	0	0	0
146	9.4	0	0	0	0	0
147	9.6	0	0	0	0	0
148	9.8	0	0	0	0	0
149	10	0	0	0	0	0
150	10.2	0	0	0	0	0
151	10.4	0	0	0	0	0
152	10.6	0	0	0	0	0
153	10.8	0	0	0	0	0
154	11	0	0	0	0	0
155	11.2	0	0	0	0	0
156	11.4	0	0	0	0	0
157	11.6	0	0	0	0	0
158	11.8	0	0	0	0	0
159	12	0	0	0	0	0
160	12.2	0	0	0	0	0
161	12.4	0	0	0	0	0
162	12.6	0	0	0	0	0
163	12.8	0	0	0	0	0
164	13	0	0	0	0	0
165	13.2	0	0	0	0	0
166	13.4	0	0	0	0	0
167	13.6	0	0	0	0	0
168	13.8	0	0	0	0	0
169	14	0	0	0	0	0
170	14.2	0	0	0	0	0
171	14.4	0	0	0	0	0
172	14.6	0	0	0	0	0
173	14.8	0	0	0	0	0
174	15	0	0	0	0	0
175	15.2	0	0	0	0	0
176	15.4	0	0	0	0	0
177	15.6	0	0	0	0	0
178	15.8	0	0	0	0	0
179	16	0	0	0	0	0
180	16.2	0	0	0	0	0
181	16.4	0	0	0	0	0
182	16.6	0	0	0	0	0
183	16.8	0	0	0	0	0
184	17	0	0	0	0	0
185	17.2	0	0	0	0	0
186	17.4	0	0	0	0	0
187	17.6	0	0	0	0	0
188	17.8	0	0	0	0	0
189	18	0	0	0	0	0
190	18.2	0	0	0	0	0
191	18.4	0	0	0	0	0
192	18.6	0	0	0	0	0
193	18.8	0	0	0	0	0
194	19	0	0	0	0	0
195	19.2	0	0	0	0	0
196	19.4	0	0	0	0	0
197	19.6	0	0	0	0	0
198	19.8	0	0	0	0	0
199	20	0	0	0	0	0
