# Supplementary material for: Quantifying the Potential for Future Gene Therapy to Lower Lifetime Risk of Polygenic Late-Onset Diseases
Source: MDPI journal article supplement (doi:10.3390/ijms20133352), 2019-07-08
Supplement: s2 [file s2 › SuppFiles/Results/LODsCommonLow/BreastCancer/0.250/FrailtyAnalysis.csv]

Age	Heritability	MeanOR	CaseOR	nControls	nCases	nCumIncidence	nIncidence	nLifeIncidence0	nAbsIncidence0	nLifeIncidence5	nAbsIncidence5	nLifeIncidence10	nAbsIncidence10	nLifeIncidence15	nAbsIncidence15	nIncActDivExp
26	0.30679	0.250006	1.08739	999996907	3093	3.093e-06	3.093e-06	3.05987e-06	3.05987e-06	3.06659e-06	3.06659e-06	3.0707e-06	3.0707e-06	3.0724e-06	3.0724e-06	0.254488
27	0.306785	0.250002	1.1217	999984727	12180	1.5273e-05	1.218e-05	1.51031e-05	1.20432e-05	1.51381e-05	1.20715e-05	1.51606e-05	1.20899e-05	1.51702e-05	1.20978e-05	0.249841
28	0.306778	0.249994	1.0869	999962793	21934	3.7207e-05	2.19343e-05	3.67787e-05	2.16756e-05	3.68679e-05	2.17298e-05	3.69272e-05	2.17666e-05	3.69544e-05	2.17842e-05	0.248964
29	0.306767	0.249982	1.11674	999930158	32635	6.9842e-05	3.26362e-05	6.90107e-05	3.2232e-05	6.91847e-05	3.23168e-05	6.93044e-05	3.23772e-05	6.93632e-05	3.24088e-05	0.250249
30	0.306753	0.249965	1.10071	999885790	44368	0.00011421	4.43711e-05	0.000112804	4.37934e-05	0.000113099	4.39146e-05	0.000113309	4.40042e-05	0.000113418	4.40548e-05	0.252236
31	0.306734	0.249944	1.09233	999829498	56292	0.000170502	5.62984e-05	0.000168331	5.5527e-05	0.000168788	5.56891e-05	0.00016912	5.58113e-05	0.000169304	5.58861e-05	0.250403
32	0.306712	0.249919	1.09087	999759670	69828	0.00024033	6.98399e-05	0.000237164	6.8833e-05	0.000237832	6.90438e-05	0.000238326	6.92058e-05	0.000238615	6.93113e-05	0.251737
33	0.306684	0.249887	1.09244	999675081	84589	0.000324919	8.46093e-05	0.000320488	8.33244e-05	0.000321425	8.35925e-05	0.000322127	8.38015e-05	0.000322559	8.39436e-05	0.253328
34	0.306652	0.249851	1.09753	999575447	99634	0.000424553	9.96664e-05	0.000418559	9.80707e-05	0.000419828	9.84035e-05	0.00042079	9.86626e-05	0.000421406	9.88469e-05	0.252444
35	0.306614	0.249808	1.09433	999458860	116587	0.00054114	0.000116637	0.000533224	0.000114664	0.000534905	0.000115077	0.000536185	0.000115395	0.000537037	0.000115631	0.253449
36	0.30657	0.249758	1.09562	999324679	134181	0.000675321	0.000134254	0.000665078	0.000131854	0.000667263	0.000132357	0.000668929	0.000132744	0.000670072	0.000133035	0.253066
37	0.30652	0.249701	1.09621	999171914	152765	0.000828086	0.000152868	0.000815055	0.000149977	0.000817851	0.000150588	0.000819979	0.000151049	0.000821476	0.000151404	0.252211
38	0.306464	0.249637	1.08991	998998139	173775	0.00100186	0.000173919	0.000985487	0.000170432	0.000989028	0.000171177	0.000991707	0.000171728	0.000993633	0.000172157	0.253009
39	0.3064	0.249565	1.09097	998801696	196443	0.0011983	0.00019664	0.00117794	0.000192455	0.00118239	0.000193361	0.00118572	0.000194017	0.00118816	0.000194528	0.25379
40	0.306328	0.249484	1.0876	998580209	221487	0.00141979	0.000221753	0.00139468	0.000216738	0.00140022	0.000217835	0.00140434	0.000218619	0.00140738	0.000219223	0.255241
41	0.306249	0.249393	1.08567	998333112	247097	0.00166689	0.000247448	0.00163618	0.0002415	0.00164304	0.000242812	0.00164808	0.000243739	0.00165183	0.000244451	0.255139
42	0.30616	0.249291	1.08585	998057224	275888	0.00194278	0.000276349	0.00190546	0.000269278	0.00191389	0.000270853	0.00192004	0.000271957	0.00192462	0.00027279	0.256229
43	0.306062	0.249179	1.0825	997751260	305964	0.00224874	0.00030656	0.00220366	0.000298202	0.00221397	0.000300077	0.00222143	0.00030139	0.00222698	0.00030236	0.256458
44	0.305954	0.249055	1.07835	997412283	338977	0.00258772	0.000339741	0.00253352	0.000329862	0.00254606	0.000332096	0.00255509	0.000333658	0.00256177	0.000334791	0.257186
45	0.305834	0.248918	1.07762	997037444	374839	0.00296256	0.000375811	0.00289766	0.000364141	0.00291286	0.000366802	0.00292374	0.000368658	0.00293176	0.000369985	0.258099
46	0.305703	0.248767	1.07089	996622580	414864	0.00337742	0.000416097	0.00329994	0.000402277	0.00331833	0.000405467	0.00333141	0.00040767	0.00334099	0.000409226	0.259845
47	0.305559	0.248601	1.07174	996167460	455120	0.00383254	0.000456662	0.00374036	0.000440424	0.00376255	0.000444215	0.00377823	0.000446814	0.00378962	0.000448635	0.259835
48	0.305402	0.248419	1.06416	995666960	500500	0.00433304	0.000502426	0.00422364	0.000483278	0.00425035	0.000487802	0.0042691	0.00049087	0.00428264	0.000493018	0.260941
49	0.30523	0.24822	1.06355	995117290	549670	0.00488271	0.000552062	0.00475312	0.000529481	0.00478524	0.000534889	0.00480761	0.000538512	0.00482368	0.000541046	0.262137
50	0.305042	0.248001	1.058	994513308	603982	0.00548669	0.000606946	0.00533338	0.000580258	0.00537198	0.000586744	0.00539864	0.000591033	0.00541771	0.000594022	0.26387
51	0.304836	0.247763	1.05537	993852415	660893	0.00614758	0.000664539	0.00596648	0.000633096	0.00601282	0.000640842	0.00604457	0.000645924	0.00606714	0.000649433	0.264869
52	0.304613	0.247502	1.05098	993128439	723976	0.00687156	0.000728454	0.00665779	0.00069131	0.00671342	0.000700599	0.0067512	0.00070663	0.0067779	0.000710763	0.2665
53	0.304382	0.247233	1.05058	992381612	746827	0.00761839	0.000751994	0.00736843	0.000710643	0.00743455	0.000721129	0.00747908	0.00072788	0.00751036	0.000732458	0.268196
54	0.304149	0.246959	1.04007	991617130	764482	0.00838287	0.000770351	0.00809311	0.000724683	0.00817095	0.000736403	0.008223	0.000743925	0.00825932	0.000748963	0.269542
55	0.303913	0.24668	1.03506	990835495	781635	0.0091645	0.000788243	0.00883101	0.000737903	0.00892189	0.000750932	0.00898233	0.000759327	0.0090242	0.000764877	0.270678
56	0.303671	0.246395	1.0324	990036634	798861	0.00996337	0.00080625	0.00958184	0.000750825	0.00968715	0.000765261	0.00975695	0.000774624	0.00980497	0.000780767	0.271812
57	0.303426	0.246105	1.02585	989218834	817800	0.0107812	0.00082603	0.0103468	0.000764962	0.010468	0.000780901	0.0105483	0.000791393	0.0106032	0.000798206	0.273493
58	0.303177	0.24581	1.02184	988385430	833404	0.0116146	0.000842487	0.0111223	0.000775541	0.0112611	0.000793026	0.0113531	0.000804727	0.0114154	0.000812261	0.274033
59	0.302922	0.245508	1.01743	987530993	854437	0.012469	0.000864478	0.0119131	0.000790713	0.012071	0.000809955	0.0121761	0.000823054	0.0122469	0.000831461	0.276323
60	0.302664	0.245201	1.01374	986660029	870964	0.01334	0.000881961	0.0127143	0.000801261	0.0128933	0.000822234	0.0130129	0.000836753	0.013093	0.000846107	0.27712
61	0.302402	0.244888	1.00738	985770203	889826	0.0142298	0.000901857	0.0135278	0.000813479	0.0137296	0.000836321	0.0138653	0.0008524	0.0139558	0.000862829	0.278635
62	0.302136	0.24457	1.00255	984860995	909208	0.015139	0.000922333	0.0143534	0.000825643	0.01458	0.000850464	0.0147335	0.000868185	0.0148357	0.00087985	0.280276
63	0.301866	0.244246	0.997603	983935045	925950	0.016065	0.000940183	0.0151882	0.000834809	0.0154417	0.000861661	0.0156146	0.000881088	0.0157298	0.000894088	0.28108
64	0.30159	0.243916	0.993297	982986454	948591	0.0170135	0.000964079	0.0160369	0.000848619	0.0163196	0.000877845	0.0165138	0.000899207	0.0166435	0.000913749	0.283636
65	0.301311	0.24358	0.990141	982020458	965996	0.0179795	0.000982715	0.0168938	0.000856983	0.0172082	0.000888687	0.0174257	0.000911949	0.0175716	0.000928052	0.284589
66	0.301029	0.24324	0.983551	981037744	982714	0.0189623	0.00100071	0.0177578	0.000863943	0.0181066	0.000898397	0.0183493	0.000923623	0.0185129	0.000941381	0.285329
67	0.300744	0.242894	0.97877	980037272	1000472	0.0199627	0.00101981	0.0186287	0.000870901	0.0190152	0.000908519	0.0192852	0.000935832	0.0194683	0.000955331	0.286359
68	0.300454	0.242542	0.975394	979015106	1022166	0.0209849	0.00104299	0.0195089	0.000880228	0.0199367	0.000921554	0.0202364	0.000951197	0.0204409	0.000972642	0.288485
69	0.30016	0.242185	0.969224	977974564	1040542	0.0220254	0.00106285	0.0203944	0.000885522	0.0208676	0.000930879	0.0211993	0.000962938	0.0214273	0.000986371	0.289643
70	0.299862	0.241822	0.962554	976913613	1060951	0.0230864	0.00108485	0.0212857	0.000891262	0.0218088	0.000941223	0.0221753	0.000976043	0.0224289	0.00100159	0.291343
71	0.299561	0.241454	0.959077	975834333	1079280	0.0241657	0.00110479	0.0221795	0.000893838	0.0227577	0.000948838	0.023162	0.000986678	0.0234433	0.00101438	0.292449
72	0.299256	0.24108	0.955444	974736025	1098308	0.025264	0.00112551	0.0230749	0.000895396	0.0237137	0.000956066	0.0241594	0.000997363	0.0244706	0.00102735	0.293728
73	0.298947	0.2407	0.949922	973617807	1118218	0.0263822	0.0011472	0.0239708	0.000895883	0.0246767	0.000962942	0.0251675	0.00100815	0.0255112	0.00104058	0.295221
74	0.298634	0.240315	0.945713	972479796	1138011	0.0275202	0.00116885	0.0248652	0.000894374	0.0256451	0.00096847	0.0261856	0.00101808	0.0265643	0.00105314	0.296662
75	0.298317	0.239925	0.940039	971323072	1156724	0.0286769	0.00118946	0.0257553	0.000890064	0.0266168	0.000971718	0.0272118	0.00102619	0.0276285	0.00106415	0.297804
76	0.297996	0.239529	0.936375	970146817	1176255	0.0298532	0.00121098	0.0266396	0.000884332	0.027591	0.000974151	0.0282459	0.00103409	0.0287038	0.00107533	0.299141
77	0.297672	0.239129	0.930098	968950828	1195989	0.0310492	0.00123279	0.027516	0.000876421	0.028566	0.00097503	0.029287	0.0010411	0.0297899	0.00108607	0.300512
78	0.297344	0.238721	0.925154	967731236	1219592	0.0322688	0.00125867	0.0283847	0.000868654	0.0295431	0.000977101	0.0303372	0.00105024	0.0308894	0.00109955	0.302828
79	0.297013	0.23831	0.918912	966494660	1236576	0.0335053	0.00127781	0.029238	0.000853336	0.030515	0.000971837	0.0313896	0.00105235	0.0319957	0.00110625	0.303482
80	0.296679	0.237893	0.914658	965237061	1257599	0.0347629	0.0013012	0.0300758	0.000837825	0.0314827	0.000967685	0.032446	0.00105646	0.0331114	0.00111568	0.305116
81	0.29634	0.23747	0.911473	963960639	1276422	0.0360394	0.00132239	0.0308935	0.000817663	0.0324423	0.00095964	0.0335031	0.00105711	0.0342335	0.00112215	0.306201
82	0.295997	0.237042	0.906601	962663078	1297561	0.0373369	0.00134607	0.0316889	0.000795457	0.0333931	0.000950853	0.034561	0.00105784	0.035363	0.00112951	0.307829
83	0.295653	0.236609	0.898358	961346799	1316279	0.0386532	0.00136733	0.032457	0.000768049	0.0343307	0.00093752	0.0356155	0.00105456	0.0364965	0.0011335	0.308869
84	0.295305	0.236171	0.893893	960008518	1338281	0.0399915	0.00139209	0.0331959	0.000738905	0.0352542	0.000923521	0.0366673	0.00105177	0.0376354	0.0011389	0.310665
85	0.294953	0.235728	0.889972	958650075	1358443	0.0413499	0.00141503	0.0339011	0.000705209	0.0361592	0.000905008	0.0377126	0.00104528	0.0387766	0.00114117	0.312018
86	0.294597	0.235279	0.885162	957270702	1379373	0.0427293	0.00143887	0.0345697	0.000668541	0.0370428	0.000883613	0.0387496	0.00103704	0.039919	0.00114237	0.313534
87	0.294239	0.234826	0.879655	955872926	1397776	0.0441271	0.00146017	0.0351971	0.000627448	0.0378997	0.000856893	0.0397739	0.00102429	0.0410585	0.00113954	0.314468
88	0.293877	0.234367	0.874822	954454232	1418694	0.0455458	0.00148419	0.0357815	0.000584374	0.0387275	0.000827808	0.0407844	0.00101046	0.0421951	0.00113662	0.315959
89	0.293511	0.233903	0.871546	953015793	1438439	0.0469842	0.00150708	0.0363194	0.00053789	0.0395217	0.000794205	0.041777	0.000992638	0.0433256	0.00113048	0.31718
90	0.293143	0.233434	0.866283	951557831	1457962	0.0484422	0.00152984	0.0368082	0.000488869	0.0402786	0.000756872	0.0427483	0.000971309	0.0444475	0.00112186	0.318345
91	0.292772	0.232961	0.859732	950079212	1478619	0.0499208	0.00155389	0.0372466	0.000438411	0.0409952	0.000716642	0.0436955	0.000947189	0.0455591	0.00111166	0.319751
92	0.292397	0.232481	0.855908	948577067	1502145	0.0514229	0.00158107	0.0376344	0.000387719	0.0416695	0.000674298	0.0446164	0.000920875	0.0466599	0.00110077	0.321762
93	0.292018	0.231997	0.850689	947055222	1521845	0.0529448	0.00160435	0.0379704	0.000336069	0.0422964	0.000626863	0.0455044	0.000887997	0.0477438	0.00108393	0.322942
94	0.291638	0.231508	0.845027	945512179	1543043	0.0544878	0.00162931	0.0382565	0.000286018	0.0428734	0.000577005	0.0463564	0.00085196	0.0488087	0.00106482	0.324434
95	0.291252	0.231014	0.840424	943947405	1564774	0.0560526	0.00165495	0.0384949	0.000238472	0.0433981	0.000524684	0.0471687	0.000812321	0.0498511	0.00104247	0.326028
96	0.290866	0.230516	0.833999	942364000	1583405	0.057636	0.00167743	0.0386889	0.000193967	0.0438676	0.00046948	0.0479361	0.000767429	0.0508654	0.00101431	0.326972
97	0.290477	0.230014	0.829171	940759837	1604163	0.0592402	0.00170228	0.0388432	0.00015432	0.0442816	0.000414051	0.0486562	0.000720093	0.0518489	0.000983416	0.328352
98	0.290083	0.229506	0.824491	939132982	1626855	0.060867	0.0017293	0.0389632	0.000120029	0.0446409	0.000359258	0.0493263	0.000670118	0.0527981	0.00094927	0.33012
99	0.289687	0.228993	0.821245	937487863	1645119	0.0625121	0.00175174	0.0390541	9.08928e-05	0.0449458	0.000304939	0.0499415	0.000615176	0.0537064	0.00090832	0.330986
100	0.289288	0.228475	0.815881	935821249	1666614	0.0641788	0.00177774	0.0391215	6.73812e-05	0.0451998	0.000253992	0.0505003	0.000558832	0.0545716	0.000865189	0.3325
101	0.288886	0.227953	0.810499	934132923	1688326	0.0658671	0.00180411	0.0391704	4.88433e-05	0.0454066	0.00020682	0.0510009	0.000500589	0.0553899	0.000818281	0.334051
102	0.288481	0.227425	0.805362	932421065	1711858	0.0675789	0.00183256	0.039205	3.45967e-05	0.0455713	0.000164681	0.0514428	0.000441848	0.0561583	0.000768436	0.335954
103	0.288071	0.226892	0.802338	930689071	1731994	0.0693109	0.00185752	0.0392288	2.38149e-05	0.0456991	0.000127787	0.0518252	0.000382476	0.0568718	0.000713426	0.337186
104	0.287661	0.226356	0.795175	928936594	1752477	0.0710634	0.00188299	0.0392447	1.593e-05	0.0457959	9.68244e-05	0.0521501	0.000324839	0.0575271	0.000655321	0.338484
105	0.287246	0.225815	0.791187	927161565	1775029	0.0728384	0.00191082	0.039255	1.03484e-05	0.0458677	7.17644e-05	0.0524206	0.000270514	0.0581223	0.000595185	0.340179
106	0.286831	0.22527	0.784726	925367955	1793610	0.074632	0.00193452	0.0392615	6.47493e-06	0.0459196	5.18891e-05	0.0526403	0.000219717	0.0586541	0.000531805	0.341112
107	0.286412	0.22472	0.780643	923551977	1815978	0.076448	0.00196244	0.0392654	3.90435e-06	0.0459563	3.67009e-05	0.052815	0.000174697	0.0591228	0.000468722	0.342766
108	0.285991	0.224166	0.776021	921714832	1837145	0.0782852	0.00198922	0.0392677	2.25969e-06	0.0459815	2.52607e-05	0.0529505	0.000135545	0.0595285	0.000405697	0.344191
109	0.285566	0.223607	0.771366	919858725	1856107	0.0801413	0.00201375	0.0392689	1.24359e-06	0.0459984	1.6872e-05	0.0530531	0.00010255	0.0598726	0.000344048	0.345205
110	0.285139	0.223044	0.767291	917981612	1877113	0.0820184	0.00204065	0.0392696	6.5699e-07	0.0460093	1.09436e-05	0.053129	7.58917e-05	0.0601586	0.000286072	0.346602
111	0.28471	0.222477	0.761711	916083312	1898300	0.0839167	0.00206791	0.0392699	3.22711e-07	0.0460162	6.85286e-06	0.0531839	5.49178e-05	0.0603912	0.000232542	0.348033
112	0.284278	0.221906	0.757156	914164833	1918479	0.0858352	0.00209422	0.0392701	1.53478e-07	0.0460203	4.12473e-06	0.0532227	3.87725e-05	0.0605757	0.000184558	0.349281
113	0.283844	0.221332	0.751823	912225971	1938862	0.087774	0.00212091	0.0392701	5.81659e-08	0.0460227	2.3848e-06	0.0532493	2.66594e-05	0.0607188	0.000143049	0.35057
114	0.283408	0.220752	0.746958	910262960	1963011	0.089737	0.00215189	0.0392701	1.96301e-08	0.046024	1.31522e-06	0.0532672	1.78438e-05	0.0608272	0.000108456	0.352538
115	0.282968	0.220168	0.742663	908280514	1982446	0.0917195	0.00217788	0.0392701	0	0.0460247	6.93856e-07	0.0532787	1.15577e-05	0.0609074	8.01503e-05	0.353661
116	0.282528	0.219581	0.738147	906280091	2000423	0.0937199	0.00220243	0.0392701	0	0.046025	3.40072e-07	0.053286	7.22153e-06	0.0609653	5.78722e-05	0.354533
117	0.282083	0.218989	0.733573	904254938	2025153	0.0957451	0.00223458	0.0392701	0	0.0460252	1.62012e-07	0.0532903	4.35408e-06	0.0610062	4.09283e-05	0.356602
118	0.281637	0.218392	0.728616	902209254	2045684	0.0977907	0.00226229	0.0392701	0	0.0460253	6.13705e-08	0.0532928	2.51619e-06	0.0610343	2.81282e-05	0.357934
119	0.281188	0.217792	0.724627	900143181	2066073	0.0998568	0.00229002	0.0392701	0	0.0460253	2.06607e-08	0.0532942	1.38427e-06	0.0610531	1.87806e-05	0.359246
120	0.280737	0.217189	0.718582	898056129	2087052	0.101944	0.00231858	0.0392701	0	0.0460253	0	0.0532949	7.30468e-07	0.0610653	1.21675e-05	0.360666
