# Supplementary material for: Quantifying the Potential for Future Gene Therapy to Lower Lifetime Risk of Polygenic Late-Onset Diseases
Source: MDPI journal article supplement (doi:10.3390/ijms20133352), 2019-07-08
Supplement: s2 [file s2 › SuppFiles/Results/LODsCommonLow/BreastCancer/0.250/IndividualsByBetaDistrib.csv]

nEntry	Beta	nDetrimentalCount	nFractionPopulation	nCumulativeFractionPopulation	nEditsNeeded	nIndividuals
0	-19.8	0	0	1	0	0
1	-19.6	0	0	1	0	0
2	-19.4	0	0	1	0	0
3	-19.2	0	0	1	0	0
4	-19	0	0	1	0	0
5	-18.8	0	0	1	0	0
6	-18.6	0	0	1	0	0
7	-18.4	0	0	1	0	0
8	-18.2	0	0	1	0	0
9	-18	0	0	1	0	0
10	-17.8	0	0	1	0	0
11	-17.6	0	0	1	0	0
12	-17.4	0	0	1	0	0
13	-17.2	0	0	1	0	0
14	-17	0	0	1	0	0
15	-16.8	0	0	1	0	0
16	-16.6	0	0	1	0	0
17	-16.4	0	0	1	0	0
18	-16.2	0	0	1	0	0
19	-16	0	0	1	0	0
20	-15.8	0	0	1	0	0
21	-15.6	0	0	1	0	0
22	-15.4	0	0	1	0	0
23	-15.2	0	0	1	0	0
24	-15	0	0	1	0	0
25	-14.8	0	0	1	0	0
26	-14.6	0	0	1	0	0
27	-14.4	0	0	1	0	0
28	-14.2	0	0	1	0	0
29	-14	0	0	1	0	0
30	-13.8	0	0	1	0	0
31	-13.6	0	0	1	0	0
32	-13.4	0	0	1	0	0
33	-13.2	0	0	1	0	0
34	-13	0	0	1	0	0
35	-12.8	0	0	1	0	0
36	-12.6	0	0	1	0	0
37	-12.4	0	0	1	0	0
38	-12.2	0	0	1	0	0
39	-12	0	0	1	0	0
40	-11.8	0	0	1	0	0
41	-11.6	0	0	1	0	0
42	-11.4	0	0	1	0	0
43	-11.2	0	0	1	0	0
44	-11	0	0	1	0	0
45	-10.8	0	0	1	0	0
46	-10.6	0	0	1	0	0
47	-10.4	0	0	1	0	0
48	-10.2	0	0	1	0	0
49	-10	0	0	1	0	0
50	-9.8	0	0	1	0	0
51	-9.6	0	0	1	0	0
52	-9.4	0	0	1	0	0
53	-9.2	0	0	1	0	0
54	-9	0	0	1	0	0
55	-8.8	0	0	1	0	0
56	-8.6	0	0	1	0	0
57	-8.4	0	0	1	0	0
58	-8.2	0	0	1	0	0
59	-8	0	0	1	0	0
60	-7.8	0	0	1	0	0
61	-7.6	0	0	1	0	0
62	-7.4	162	1e-09	1	0	1
63	-7.2	0	0	1	0	0
64	-7	164	1e-09	1	0	1
65	-6.8	168.5	2e-09	1	0	2
66	-6.6	166.92	2.6e-08	1	0	26
67	-6.4	170.17	2.4e-08	0.99999997	0	24
68	-6.2	170.5	1.01e-07	0.99999995	0	101
69	-6	173.19	2.03e-07	0.99999985	0	203
70	-5.8	175.13	5.5e-07	0.99999964	0	550
71	-5.6	176.94	1.3e-06	0.99999909	0	1300
72	-5.4	178.86	2.72e-06	0.99999779	0	2720
73	-5.2	180.71	6.051e-06	0.99999507	0	6051
74	-5	182.62	1.2865e-05	0.99998902	0	12865
75	-4.8	184.51	2.5737e-05	0.99997616	0	25737
76	-4.6	186.44	5.1142e-05	0.99995042	0	51142
77	-4.4	188.35	9.5514e-05	0.99989928	0	95514
78	-4.2	190.28	0.000176882	0.99980376	0	176882
79	-4	192.17	0.000315251	0.99962688	0	315251
80	-3.8	194.07	0.000542947	0.99931163	0	542947
81	-3.6	195.97	0.000910472	0.99876868	0	910472
82	-3.4	197.88	0.001480169	0.99785821	0	1480169
83	-3.2	199.78	0.002337176	0.99637804	0	2337176
84	-3	201.68	0.003573085	0.99404087	0	3573085
85	-2.8	203.58	0.005310359	0.99046778	0	5310359
86	-2.6	205.48	0.00765547	0.98515742	0	7655470
87	-2.4	207.37	0.010729127	0.97750195	0	10729127
88	-2.2	209.27	0.014587973	0.96677282	0	14587973
89	-2	211.17	0.019261965	0.95218485	0	19261965
90	-1.8	213.06	0.024734317	0.93292289	0	24734317
91	-1.6	214.96	0.030847718	0.90818857	0	30847718
92	-1.4	216.85	0.037405115	0.87734085	0	37405115
93	-1.2	218.74	0.044073002	0.83993574	0	44073002
94	-1	220.63	0.050496515	0.79586274	0	50496515
95	-0.8	222.52	0.056274666	0.74536622	0	56274666
96	-0.6	224.41	0.060960608	0.68909155	0	60960608
97	-0.4	226.3	0.064253309	0.62813095	0	64253309
98	-0.2	228.19	0.06588658	0.56387764	0	65886580
99	0	230.08	0.065716537	0.49799106	0	65716537
100	0.2	231.96	0.063783948	0.43227452	1.886	63783948
101	0.4	233.85	0.060255872	0.36849057	3.7725	60255872
102	0.6	235.73	0.055409542	0.3082347	5.658	55409542
103	0.8	237.62	0.049592421	0.25282516	7.543	49592421
104	1	239.5	0.043209949	0.20323274	9.4263	43209949
105	1.2	241.39	0.03665425	0.16002279	11.311	36654250
106	1.4	243.27	0.030282025	0.12336854	13.195	30282025
107	1.6	245.15	0.024370572	0.093086513	15.076	24370572
108	1.8	247.03	0.01910616	0.068715941	16.959	19106160
109	2	248.92	0.014589097	0.049609781	18.842	14589097
110	2.2	250.8	0.01085787	0.035020684	20.721	10857870
111	2.4	252.68	0.007865994	0.024162814	22.601	7865994
112	2.6	254.56	0.005558083	0.01629682	24.483	5558083
113	2.8	256.44	0.003823737	0.010738737	26.365	3823737
114	3	258.32	0.002564651	0.006915	28.24	2564651
115	3.2	260.2	0.001676552	0.004350349	30.123	1676552
116	3.4	262.08	0.001067464	0.002673797	32.007	1067464
117	3.6	263.96	0.000663613	0.001606333	33.883	663613
118	3.8	265.85	0.000403006	0.00094272	35.772	403006
119	4	267.71	0.000237574	0.000539714	37.631	237574
120	4.2	269.58	0.000137159	0.00030214	39.503	137159
121	4.4	271.44	7.7231e-05	0.000164981	41.368	77231
122	4.6	273.35	4.2039e-05	8.775e-05	43.275	42039
123	4.8	275.21	2.2688e-05	4.5711e-05	45.137	22688
124	5	277.11	1.1633e-05	2.3023e-05	47.029	11633
125	5.2	278.99	5.904e-06	1.139e-05	48.912	5904
126	5.4	280.9	2.895e-06	5.486e-06	50.823	2895
127	5.6	282.74	1.414e-06	2.591e-06	52.664	1414
128	5.8	284.41	6.57e-07	1.177e-06	54.33	657
129	6	286.82	2.95e-07	5.2e-07	56.741	295
130	6.2	288.15	1.23e-07	2.25e-07	58.07	123
131	6.4	290.54	5.4e-08	1.02e-07	60.461	54
132	6.6	292.19	2.6e-08	4.8e-08	62.116	26
133	6.8	294.46	1.3e-08	2.2e-08	64.385	13
134	7	295.67	3e-09	9e-09	65.59	3
135	7.2	297.5	4e-09	6e-09	67.424	4
136	7.4	297.5	2e-09	2e-09	67.424	2
137	7.6	0	0	0	0	0
138	7.8	0	0	0	0	0
139	8	0	0	0	0	0
140	8.2	0	0	0	0	0
141	8.4	0	0	0	0	0
142	8.6	0	0	0	0	0
143	8.8	0	0	0	0	0
144	9	0	0	0	0	0
145	9.2	0	0	0	0	0
146	9.4	0	0	0	0	0
147	9.6	0	0	0	0	0
148	9.8	0	0	0	0	0
149	10	0	0	0	0	0
150	10.2	0	0	0	0	0
151	10.4	0	0	0	0	0
152	10.6	0	0	0	0	0
153	10.8	0	0	0	0	0
154	11	0	0	0	0	0
155	11.2	0	0	0	0	0
156	11.4	0	0	0	0	0
157	11.6	0	0	0	0	0
158	11.8	0	0	0	0	0
159	12	0	0	0	0	0
160	12.2	0	0	0	0	0
161	12.4	0	0	0	0	0
162	12.6	0	0	0	0	0
163	12.8	0	0	0	0	0
164	13	0	0	0	0	0
165	13.2	0	0	0	0	0
166	13.4	0	0	0	0	0
167	13.6	0	0	0	0	0
168	13.8	0	0	0	0	0
169	14	0	0	0	0	0
170	14.2	0	0	0	0	0
171	14.4	0	0	0	0	0
172	14.6	0	0	0	0	0
173	14.8	0	0	0	0	0
174	15	0	0	0	0	0
175	15.2	0	0	0	0	0
176	15.4	0	0	0	0	0
177	15.6	0	0	0	0	0
178	15.8	0	0	0	0	0
179	16	0	0	0	0	0
180	16.2	0	0	0	0	0
181	16.4	0	0	0	0	0
182	16.6	0	0	0	0	0
183	16.8	0	0	0	0	0
184	17	0	0	0	0	0
185	17.2	0	0	0	0	0
186	17.4	0	0	0	0	0
187	17.6	0	0	0	0	0
188	17.8	0	0	0	0	0
189	18	0	0	0	0	0
190	18.2	0	0	0	0	0
191	18.4	0	0	0	0	0
192	18.6	0	0	0	0	0
193	18.8	0	0	0	0	0
194	19	0	0	0	0	0
195	19.2	0	0	0	0	0
196	19.4	0	0	0	0	0
197	19.6	0	0	0	0	0
198	19.8	0	0	0	0	0
199	20	0	0	0	0	0
