# Supplementary material for: Quantifying the Potential for Future Gene Therapy to Lower Lifetime Risk of Polygenic Late-Onset Diseases
Source: MDPI journal article supplement (doi:10.3390/ijms20133352), 2019-07-08
Supplement: s2 [file s2 › SuppFiles/Results/LODsCommonLow/BreastCancer/1.000/FrailtyAnalysis.csv]

Age	Heritability	MeanOR	CaseOR	nControls	nCases	nCumIncidence	nIncidence	nLifeIncidence0	nAbsIncidence0	nLifeIncidence5	nAbsIncidence5	nLifeIncidence10	nAbsIncidence10	nLifeIncidence15	nAbsIncidence15	nIncActDivExp
26	0.306747	0.999955	4.42358	999987658	12342	1.2342e-05	1.2342e-05	1.22098e-05	1.22098e-05	1.22366e-05	1.22366e-05	1.2253e-05	1.2253e-05	1.22598e-05	1.22598e-05	1.01548
27	0.306732	0.999883	4.35997	999938984	48674	6.1016e-05	4.86746e-05	6.03372e-05	4.81274e-05	6.04769e-05	4.82403e-05	6.05668e-05	4.83138e-05	6.06053e-05	4.83455e-05	0.99843
28	0.306703	0.999753	4.40836	999850837	88147	0.000149163	8.81524e-05	0.000147446	8.71086e-05	0.000147803	8.73264e-05	0.000148041	8.74744e-05	0.00014815	8.7545e-05	1.00057
29	0.30666	0.99956	4.37166	999720118	130719	0.000279882	0.000130739	0.00027655	0.000129105	0.000277248	0.000129444	0.000277728	0.000129686	0.000277963	0.000129813	1.00248
30	0.306603	0.999299	4.39368	999544068	176050	0.000455932	0.000176099	0.000450321	0.00017377	0.000451499	0.000174251	0.000452334	0.000174606	0.00045277	0.000174807	1.00107
31	0.30653	0.998968	4.36064	999319180	224888	0.00068082	0.000224991	0.000672152	0.000221832	0.000673978	0.000222479	0.000675301	0.000222967	0.000676037	0.000223267	1.00071
32	0.306441	0.998559	4.35974	999041687	277493	0.000958313	0.000277682	0.000945691	0.000273539	0.000948355	0.000274377	0.000950322	0.000275021	0.000951477	0.00027544	1.0009
33	0.306333	0.998067	4.34269	998707044	334643	0.00129296	0.000334964	0.00127533	0.00032964	0.00127906	0.000330701	0.00128185	0.000331527	0.00128357	0.00033209	1.00291
34	0.306206	0.997487	4.34699	998312212	394832	0.00168779	0.000395343	0.00166397	0.000388637	0.00166901	0.000389956	0.00167283	0.000390982	0.00167528	0.000391713	1.00136
35	0.306059	0.996815	4.32617	997853981	458231	0.00214602	0.000459006	0.00211464	0.000450675	0.00212131	0.000452297	0.00212638	0.000453548	0.00212975	0.000454474	0.997411
36	0.30589	0.99604	4.31396	997324542	529439	0.00267546	0.000530578	0.0026349	0.000520259	0.00264355	0.000522244	0.00265015	0.000523769	0.00265467	0.000524918	1.00013
37	0.305699	0.995157	4.28975	996719049	605493	0.00328095	0.000607117	0.00322934	0.000594443	0.00324042	0.000596865	0.00324884	0.000598693	0.00325477	0.000600098	1.00166
38	0.305483	0.994159	4.27006	996033033	686016	0.00396697	0.000688274	0.00390216	0.000672817	0.00391618	0.00067576	0.00392678	0.000677935	0.0039344	0.000679629	1.00127
39	0.305242	0.993039	4.24766	995260677	772356	0.00473932	0.000775432	0.00465884	0.000756677	0.00467641	0.000760238	0.00468959	0.000762817	0.00469922	0.000764826	1.0008
40	0.304974	0.991788	4.22381	994394690	865987	0.00560531	0.000870111	0.00550626	0.00084742	0.00552812	0.000851707	0.00554437	0.000854772	0.00555636	0.000857137	1.00151
41	0.304676	0.990399	4.20183	993430605	964085	0.00656939	0.000969519	0.00644851	0.000942248	0.00647549	0.000947368	0.00649535	0.000950983	0.00651012	0.00095376	0.999652
42	0.304349	0.988865	4.16397	992359355	1071250	0.00764064	0.00107833	0.00749409	0.00104558	0.00752719	0.0010517	0.00755133	0.00105598	0.00756934	0.00105922	0.999827
43	0.303991	0.987172	4.1334	991171644	1187711	0.00882836	0.00119686	0.00865167	0.00115758	0.00869205	0.00116486	0.00872129	0.00116995	0.00874306	0.00117372	1.00125
44	0.303597	0.985308	4.11605	989861182	1310462	0.0101388	0.00132213	0.00992689	0.00127522	0.00997591	0.00128386	0.0100112	0.0012899	0.0100373	0.00129428	1.00086
45	0.303169	0.983269	4.07759	988419586	1441596	0.0115804	0.00145636	0.0113273	0.00140045	0.0113866	0.00141069	0.011429	0.00141782	0.0114603	0.00142293	1.0002
46	0.302705	0.981044	4.03618	986836619	1582967	0.0131634	0.00160151	0.0128623	0.00153494	0.0129337	0.00154711	0.0129845	0.00155552	0.0130217	0.00156145	1.00012
47	0.302201	0.978616	4.00056	985100394	1736225	0.0148996	0.00175938	0.0145424	0.00168016	0.0146283	0.00169463	0.0146891	0.00170454	0.0147332	0.00171148	1.00107
48	0.301656	0.975977	3.96234	983201922	1898472	0.0167981	0.00192719	0.0163756	0.00183315	0.0164786	0.00185031	0.016551	0.00186195	0.0166033	0.00187009	1.00091
49	0.301068	0.973118	3.91728	981130395	2071527	0.0188696	0.00210692	0.018371	0.00199544	0.0184945	0.00201582	0.0185805	0.00202948	0.0186423	0.00203902	1.00043
50	0.300436	0.970021	3.87703	978873127	2257268	0.0211269	0.00230068	0.0205396	0.0021686	0.0206873	0.00219285	0.0207894	0.00220887	0.0208624	0.00222005	1.00022
51	0.299757	0.966676	3.82985	976416966	2456161	0.023583	0.00250917	0.0228925	0.00235285	0.023069	0.00238164	0.0231899	0.00240053	0.0232759	0.00241357	1.0001
52	0.29903	0.963072	3.78064	973750019	2666947	0.02625	0.00273136	0.0254391	0.00254661	0.0256498	0.00258083	0.0257929	0.00260305	0.0258942	0.00261828	0.999251
53	0.298296	0.959408	3.73183	971017603	2732416	0.0289824	0.00280608	0.0280391	0.00260003	0.0282882	0.00263839	0.028456	0.00266309	0.0285741	0.00267984	1.00078
54	0.297555	0.955705	3.69752	968242307	2775296	0.0317577	0.00285813	0.0306699	0.00263081	0.0309615	0.00267336	0.0311567	0.00270067	0.031293	0.00271896	1.00005
55	0.296811	0.95197	3.64999	965421027	2821280	0.034579	0.00291382	0.0333334	0.00266343	0.033672	0.00271046	0.0338975	0.00274076	0.0340538	0.00276079	1.00059
56	0.296067	0.94821	3.60458	962559989	2861038	0.03744	0.00296351	0.0360224	0.002689	0.0364127	0.0027407	0.0366717	0.00277423	0.03685	0.00279624	0.999094
57	0.29532	0.944419	3.55886	959653482	2906507	0.0403465	0.00301956	0.0387411	0.00271872	0.0391881	0.00277537	0.0394844	0.00281266	0.0396869	0.00283687	0.999755
58	0.294569	0.940599	3.51923	956705106	2948376	0.0432949	0.00307233	0.0414848	0.00274367	0.0419936	0.00280553	0.0423313	0.00284692	0.0425605	0.00287358	0.999328
59	0.293817	0.936747	3.47493	953710958	2994148	0.046289	0.00312965	0.0442556	0.00277084	0.0448319	0.00283827	0.0452154	0.00288417	0.0454741	0.00291364	1.00037
60	0.293061	0.932867	3.43719	950675383	3035575	0.0493246	0.00318291	0.0470483	0.00279264	0.0476976	0.00286573	0.0481318	0.00291634	0.0484231	0.00294894	1.0001
61	0.292304	0.928964	3.39412	947598990	3076393	0.052401	0.00323601	0.0498607	0.00281244	0.050589	0.00289141	0.0510788	0.002947	0.0514061	0.00298306	0.999786
62	0.291544	0.925036	3.35719	944484320	3114670	0.0555157	0.00328691	0.0526891	0.0028284	0.0535024	0.00291343	0.0540529	0.00297414	0.0544202	0.0030141	0.998817
63	0.290781	0.921077	3.32051	941325517	3158803	0.0586745	0.00334447	0.055537	0.00284788	0.0564419	0.00293949	0.0570587	0.00300576	0.0574703	0.00305011	0.999873
64	0.290016	0.917095	3.28259	938127136	3198381	0.0618729	0.00339774	0.0583983	0.0028613	0.0594018	0.00295985	0.0600906	0.00303187	0.0605512	0.0030809	0.99963
65	0.289248	0.913087	3.24455	934886565	3240571	0.0651134	0.0034543	0.0612731	0.00287487	0.062383	0.00298123	0.0631498	0.00305926	0.0636645	0.00311328	1.00035
66	0.288479	0.909059	3.20951	931609915	3276650	0.0683901	0.00350486	0.0641538	0.00288063	0.0653785	0.00299551	0.0662294	0.00307963	0.0668033	0.00313883	0.999334
67	0.287708	0.905007	3.17025	928290048	3319867	0.07171	0.00356358	0.0670437	0.00288991	0.0683933	0.00301474	0.0693348	0.00310537	0.0699734	0.00317007	1.00064
68	0.286937	0.900937	3.13252	924932249	3357799	0.0750678	0.00361719	0.0699352	0.00289154	0.0714205	0.00302729	0.0724595	0.00312467	0.0731685	0.00319511	1.00049
69	0.286163	0.896846	3.09906	921537006	3395243	0.078463	0.0036708	0.0728246	0.00288942	0.074458	0.00303742	0.0756015	0.00314203	0.076387	0.00321849	1.00035
70	0.285389	0.892738	3.06435	918107025	3429981	0.081893	0.00372202	0.075706	0.00288139	0.0775009	0.00304291	0.078757	0.00315548	0.0796251	0.00323807	0.999576
71	0.284614	0.888616	3.02943	914642676	3464349	0.0853573	0.00377336	0.0785751	0.0028691	0.0805465	0.00304565	0.0819241	0.00316711	0.0828811	0.00325604	0.998851
72	0.283836	0.884473	2.99349	911137034	3505642	0.088863	0.0038328	0.0814331	0.00285797	0.0835981	0.00305163	0.0851075	0.00318344	0.0861603	0.00327914	1.00026
73	0.28306	0.880318	2.96054	907598958	3538076	0.092401	0.00388314	0.0842677	0.0028346	0.0866449	0.00304678	0.0882974	0.00318982	0.0894527	0.00329243	0.999291
74	0.282283	0.876152	2.92413	904027288	3571670	0.0959727	0.0039353	0.0870747	0.00280701	0.0896845	0.00303956	0.0914926	0.00319525	0.092758	0.00330529	0.998806
75	0.281503	0.871964	2.89466	900416890	3610398	0.0995831	0.00399368	0.0898528	0.00277809	0.0927174	0.00303295	0.0946956	0.00320296	0.0960794	0.00332146	0.999895
76	0.280722	0.867762	2.86013	896769649	3647241	0.10323	0.00405061	0.0925949	0.00274207	0.095738	0.00302057	0.097902	0.00320644	0.0994138	0.00333431	1.0006
77	0.279943	0.863551	2.82779	893092840	3676809	0.106907	0.00410006	0.0952893	0.00269437	0.0987355	0.00299752	0.101103	0.00320063	0.102753	0.00333887	0.999454
78	0.279163	0.859327	2.79469	889379282	3713558	0.110621	0.00415809	0.0979342	0.00264498	0.101711	0.00297519	0.104301	0.00319789	0.106101	0.00334803	1.00041
79	0.278381	0.855091	2.76525	885634513	3744769	0.114365	0.00421054	0.100518	0.00258419	0.104654	0.00294305	0.107487	0.00318687	0.109451	0.00335011	1.00001
80	0.277599	0.850847	2.73654	881862345	3772168	0.118138	0.00425928	0.103031	0.00251306	0.107556	0.00290257	0.110656	0.00316885	0.112797	0.00334648	0.998753
81	0.276815	0.846588	2.70721	878055758	3806587	0.121944	0.00431653	0.10547	0.00243846	0.110418	0.00286187	0.113809	0.00315254	0.116144	0.00334652	0.999498
82	0.276031	0.842316	2.67687	874213624	3842134	0.125786	0.00437573	0.107825	0.00235538	0.113234	0.00281552	0.116941	0.0031323	0.119488	0.00334454	1.00067
83	0.275248	0.838038	2.64631	870342758	3870866	0.129657	0.00442783	0.110084	0.00225865	0.115991	0.00275702	0.120042	0.00310122	0.122822	0.00333336	1.00021
84	0.274464	0.833752	2.61766	866442185	3900573	0.133558	0.00448165	0.112238	0.00215362	0.118682	0.00269171	0.123108	0.0030655	0.126141	0.00331947	1.00015
85	0.273682	0.829464	2.58699	862514623	3927562	0.137485	0.00453298	0.114277	0.00203892	0.121299	0.00261658	0.12613	0.00302214	0.129441	0.00329939	0.999532
86	0.2729	0.825171	2.55793	858558143	3956480	0.141442	0.00458715	0.116194	0.00191759	0.123834	0.00253448	0.129105	0.00297456	0.132717	0.00327668	0.999552
87	0.272118	0.820865	2.53042	854568774	3989369	0.145431	0.00464659	0.117985	0.00179079	0.126279	0.00244564	0.132028	0.00292341	0.13597	0.00325233	1.00071
88	0.271335	0.816556	2.5035	850553558	4015216	0.149446	0.00469853	0.119639	0.00165391	0.128622	0.00234288	0.134888	0.00285984	0.139186	0.00321687	1.00024
89	0.270554	0.812241	2.47564	846510516	4043042	0.153489	0.00475342	0.121151	0.00151186	0.130854	0.00223228	0.137678	0.00279002	0.142364	0.00317747	1.00041
90	0.269772	0.807923	2.44911	842441638	4068878	0.157558	0.00480665	0.122515	0.00136434	0.132967	0.00211228	0.140389	0.00271073	0.145495	0.00313088	1.00022
91	0.26899	0.803603	2.42207	838347183	4094455	0.161653	0.00486022	0.123729	0.00121401	0.134951	0.00198446	0.143011	0.00262287	0.148573	0.00307829	1.00011
92	0.26821	0.799277	2.39657	834226547	4120636	0.165773	0.00491519	0.124793	0.00106358	0.136801	0.00184971	0.145537	0.00252611	0.151593	0.0030196	1.00028
93	0.26743	0.79495	2.36871	830078815	4147732	0.169921	0.00497195	0.125709	0.000915944	0.138509	0.00170849	0.147958	0.0024202	0.154547	0.00295422	1.00082
94	0.266649	0.790622	2.34468	825910475	4168340	0.17409	0.00502162	0.126481	0.000772644	0.140068	0.00155871	0.150259	0.00230147	0.157423	0.00287649	0.999924
95	0.265871	0.786294	2.319	821718837	4191638	0.178281	0.00507517	0.12712	0.000638806	0.141473	0.0014055	0.152435	0.00217601	0.160216	0.00279251	0.999817
96	0.265093	0.781971	2.29374	817508985	4209852	0.182491	0.00512323	0.127636	0.000515707	0.142722	0.00124822	0.154476	0.00204039	0.162913	0.00269679	0.998641
97	0.264317	0.777646	2.2685	813274179	4234806	0.186726	0.00518013	0.128043	0.000407388	0.143815	0.00109305	0.156377	0.00190096	0.165509	0.00259611	0.999196
98	0.263541	0.773324	2.24168	809015171	4259008	0.190985	0.00523687	0.128357	0.00031423	0.144755	0.000940517	0.158131	0.00175433	0.167994	0.00248513	0.999707
99	0.262765	0.768994	2.22045	804730566	4284605	0.195269	0.00529607	0.128594	0.000236724	0.145549	0.000794194	0.159733	0.00160219	0.17036	0.00236566	1.00068
100	0.26199	0.764667	2.19654	800428037	4302529	0.199572	0.00534655	0.128768	0.000173951	0.146205	0.000655705	0.161176	0.00144268	0.172593	0.00223357	0.99999
101	0.261217	0.760348	2.17195	796108413	4319624	0.203892	0.00539664	0.128893	0.000124967	0.146734	0.000529154	0.162456	0.00128077	0.174687	0.00209359	0.999249
102	0.260445	0.756029	2.14926	791767314	4341099	0.208233	0.0054529	0.128981	8.77336e-05	0.147152	0.000417614	0.163577	0.00112048	0.176635	0.00194868	0.999652
103	0.259675	0.751715	2.12437	787406575	4360739	0.212593	0.0055076	0.129041	5.99602e-05	0.147474	0.000321735	0.16454	0.000962982	0.178432	0.00179623	0.999764
104	0.258904	0.747404	2.10245	783027557	4379018	0.216972	0.00556132	0.12908	3.98053e-05	0.147716	0.000241941	0.165352	0.000811695	0.180069	0.00163749	0.999698
105	0.258135	0.743093	2.08105	778629320	4398237	0.221371	0.00561696	0.129106	2.56417e-05	0.147893	0.000177821	0.166022	0.000670291	0.181544	0.00147477	0.999976
106	0.257367	0.738789	2.05773	774213662	4415658	0.225786	0.00567107	0.129122	1.59405e-05	0.148021	0.000127745	0.166563	0.000540918	0.182853	0.00130924	0.999976
107	0.256599	0.734487	2.03578	769778519	4435143	0.230221	0.00572858	0.129132	9.53556e-06	0.148111	8.96342e-05	0.166989	0.000426661	0.183998	0.00114475	1.00057
108	0.255833	0.730195	2.01316	765329485	4449034	0.234671	0.00577963	0.129137	5.47231e-06	0.148172	6.11742e-05	0.167318	0.00032825	0.18498	0.00098248	1.00004
109	0.255071	0.725908	1.99126	760864233	4465252	0.239136	0.00583442	0.12914	2.99172e-06	0.148213	4.05891e-05	0.167564	0.000246705	0.185808	0.000827679	1.00016
110	0.254308	0.721625	1.97029	756381575	4482658	0.243618	0.00589153	0.129142	1.56893e-06	0.148239	2.61339e-05	0.167746	0.000181234	0.186491	0.000683157	1.00067
111	0.253546	0.717353	1.94985	751889817	4491758	0.24811	0.00593848	0.129142	7.63599e-07	0.148255	1.62152e-05	0.167876	0.000129947	0.187041	0.00055024	0.999458
112	0.252786	0.713084	1.9291	747380857	4508960	0.252619	0.00599684	0.129143	3.60717e-07	0.148265	9.69426e-06	0.167967	9.11261e-05	0.187475	0.000433762	1.00017
113	0.252028	0.708824	1.90879	742859793	4521064	0.25714	0.00604921	0.129143	1.35632e-07	0.14827	5.56091e-06	0.168029	6.21646e-05	0.187809	0.000333564	0.999886
114	0.251271	0.704574	1.88798	738327273	4532520	0.261673	0.00610145	0.129143	4.53252e-08	0.148273	3.03679e-06	0.16807	4.12006e-05	0.188059	0.000250422	0.999582
115	0.250516	0.700332	1.8677	733781869	4545404	0.266218	0.00615635	0.129143	0	0.148275	1.59089e-06	0.168097	2.64997e-05	0.188243	0.000183771	0.999716
116	0.249763	0.696096	1.84907	729224797	4557072	0.270775	0.00621039	0.129143	0	0.148276	7.74702e-07	0.168113	1.6451e-05	0.188375	0.000131836	0.999709
117	0.249012	0.691869	1.82879	724655326	4569471	0.275345	0.0062662	0.129143	0	0.148276	3.65558e-07	0.168123	9.82436e-06	0.188467	9.2349e-05	0.999985
118	0.248262	0.687653	1.80899	720076077	4579249	0.279924	0.00631921	0.129143	0	0.148276	1.37377e-07	0.168129	5.63248e-06	0.18853	6.29647e-05	0.999812
119	0.247511	0.683438	1.79187	715483463	4592614	0.284517	0.00637796	0.129143	0	0.148276	4.59261e-08	0.168132	3.07705e-06	0.188572	4.17469e-05	1.00054
120	0.246764	0.679239	1.7723	710885460	4598003	0.289115	0.00642643	0.129143	0	0.148276	0	0.168133	1.6093e-06	0.188599	2.68064e-05	0.999662
