# Supplementary material for: Quantifying the Potential for Future Gene Therapy to Lower Lifetime Risk of Polygenic Late-Onset Diseases
Source: MDPI journal article supplement (doi:10.3390/ijms20133352), 2019-07-08
Supplement: s2 [file s2 › SuppFiles/Results/LODsCommonLow/BreastCancer/1.000/IndividualsByBetaDistrib.csv]

nEntry	Beta	nDetrimentalCount	nFractionPopulation	nCumulativeFractionPopulation	nEditsNeeded	nIndividuals
0	-19.8	0	0	1	0	0
1	-19.6	0	0	1	0	0
2	-19.4	0	0	1	0	0
3	-19.2	0	0	1	0	0
4	-19	0	0	1	0	0
5	-18.8	0	0	1	0	0
6	-18.6	0	0	1	0	0
7	-18.4	0	0	1	0	0
8	-18.2	0	0	1	0	0
9	-18	0	0	1	0	0
10	-17.8	0	0	1	0	0
11	-17.6	0	0	1	0	0
12	-17.4	0	0	1	0	0
13	-17.2	0	0	1	0	0
14	-17	0	0	1	0	0
15	-16.8	0	0	1	0	0
16	-16.6	0	0	1	0	0
17	-16.4	0	0	1	0	0
18	-16.2	0	0	1	0	0
19	-16	0	0	1	0	0
20	-15.8	0	0	1	0	0
21	-15.6	0	0	1	0	0
22	-15.4	0	0	1	0	0
23	-15.2	0	0	1	0	0
24	-15	0	0	1	0	0
25	-14.8	0	0	1	0	0
26	-14.6	0	0	1	0	0
27	-14.4	0	0	1	0	0
28	-14.2	0	0	1	0	0
29	-14	0	0	1	0	0
30	-13.8	0	0	1	0	0
31	-13.6	0	0	1	0	0
32	-13.4	0	0	1	0	0
33	-13.2	0	0	1	0	0
34	-13	0	0	1	0	0
35	-12.8	0	0	1	0	0
36	-12.6	0	0	1	0	0
37	-12.4	0	0	1	0	0
38	-12.2	0	0	1	0	0
39	-12	0	0	1	0	0
40	-11.8	0	0	1	0	0
41	-11.6	0	0	1	0	0
42	-11.4	0	0	1	0	0
43	-11.2	0	0	1	0	0
44	-11	0	0	1	0	0
45	-10.8	0	0	1	0	0
46	-10.6	0	0	1	0	0
47	-10.4	0	0	1	0	0
48	-10.2	0	0	1	0	0
49	-10	0	0	1	0	0
50	-9.8	0	0	1	0	0
51	-9.6	0	0	1	0	0
52	-9.4	0	0	1	0	0
53	-9.2	0	0	1	0	0
54	-9	0	0	1	0	0
55	-8.8	0	0	1	0	0
56	-8.6	0	0	1	0	0
57	-8.4	0	0	1	0	0
58	-8.2	0	0	1	0	0
59	-8	0	0	1	0	0
60	-7.8	0	0	1	0	0
61	-7.6	0	0	1	0	0
62	-7.4	0	0	1	0	0
63	-7.2	0	0	1	0	0
64	-7	160.67	3e-09	1	0	3
65	-6.8	166.6	5e-09	1	0	5
66	-6.6	167.67	1.2e-08	0.99999999	0	12
67	-6.4	169.02	4.5e-08	0.99999998	0	45
68	-6.2	171.56	1.14e-07	0.99999993	0	114
69	-6	173.2	2.21e-07	0.99999982	0	221
70	-5.8	175.17	5.49e-07	0.9999996	0	549
71	-5.6	176.84	1.267e-06	0.99999905	0	1267
72	-5.4	178.69	2.835e-06	0.99999778	0	2835
73	-5.2	180.67	6.174e-06	0.99999495	0	6174
74	-5	182.65	1.2703e-05	0.99998878	0	12703
75	-4.8	184.51	2.5717e-05	0.99997607	0	25717
76	-4.6	186.49	5.0665e-05	0.99995035	0	50665
77	-4.4	188.36	9.6223e-05	0.99989969	0	96223
78	-4.2	190.27	0.00017675	0.99980347	0	176750
79	-4	192.17	0.000314957	0.99962672	0	314957
80	-3.8	194.07	0.000542731	0.99931176	0	542731
81	-3.6	195.98	0.000910261	0.99876903	0	910261
82	-3.4	197.88	0.001480088	0.99785877	0	1480088
83	-3.2	199.78	0.002334995	0.99637868	0	2334995
84	-3	201.68	0.003568914	0.99404368	0	3568914
85	-2.8	203.58	0.005307695	0.99047477	0	5307695
86	-2.6	205.48	0.0076552	0.98516708	0	7655200
87	-2.4	207.37	0.010719841	0.97751188	0	10719841
88	-2.2	209.27	0.014585525	0.96679203	0	14585525
89	-2	211.17	0.01926631	0.95220651	0	19266310
90	-1.8	213.06	0.024737737	0.9329402	0	24737737
91	-1.6	214.96	0.030854447	0.90820246	0	30854447
92	-1.4	216.85	0.037403981	0.87734802	0	37403981
93	-1.2	218.74	0.044094223	0.83994404	0	44094223
94	-1	220.63	0.050502183	0.79584981	0	50502183
95	-0.8	222.52	0.056274844	0.74534763	0	56274844
96	-0.6	224.41	0.06096731	0.68907279	0	60967310
97	-0.4	226.3	0.064244905	0.62810548	0	64244905
98	-0.2	228.19	0.065883056	0.56386057	0	65883056
99	0	230.08	0.0657162	0.49797751	0	65716200
100	0.2	231.96	0.063788295	0.43226131	1.8866	63788295
101	0.4	233.85	0.06024327	0.36847302	3.7723	60243270
102	0.6	235.73	0.055414277	0.30822975	5.6585	55414277
103	0.8	237.62	0.049585938	0.25281547	7.543	49585938
104	1	239.5	0.043218763	0.20322953	9.4265	43218763
105	1.2	241.39	0.036665738	0.16001077	11.31	36665738
106	1.4	243.27	0.030288325	0.12334503	13.193	30288325
107	1.6	245.15	0.024376348	0.093056708	15.077	24376348
108	1.8	247.04	0.019099483	0.06868036	16.959	19099483
109	2	248.92	0.014586614	0.049580877	18.841	14586614
110	2.2	250.8	0.010847274	0.034994263	20.722	10847274
111	2.4	252.68	0.007866083	0.024146989	22.602	7866083
112	2.6	254.56	0.005550469	0.016280906	24.484	5550469
113	2.8	256.44	0.00382205	0.010730437	26.368	3822050
114	3	258.31	0.002563804	0.006908387	28.236	2563804
115	3.2	260.2	0.001674823	0.004344583	30.121	1674823
116	3.4	262.08	0.001067516	0.00266976	32.003	1067516
117	3.6	263.95	0.000663501	0.001602244	33.878	663501
118	3.8	265.84	0.000400829	0.000938743	35.766	400829
119	4	267.7	0.000237007	0.000537914	37.629	237007
120	4.2	269.58	0.000136956	0.000300907	39.501	136956
121	4.4	271.47	7.629e-05	0.000163951	41.39	76290
122	4.6	273.34	4.1958e-05	8.7661e-05	43.262	41958
123	4.8	275.2	2.222e-05	4.5703e-05	45.127	22220
124	5	277.1	1.1755e-05	2.3483e-05	47.029	11755
125	5.2	278.94	6.068e-06	1.1728e-05	48.866	6068
126	5.4	280.85	2.965e-06	5.66e-06	50.773	2965
127	5.6	282.71	1.366e-06	2.695e-06	52.633	1366
128	5.8	284.67	7.21e-07	1.329e-06	54.597	721
129	6	286.81	3.31e-07	6.08e-07	56.737	331
130	6.2	288.18	1.52e-07	2.77e-07	58.101	152
131	6.4	290.21	6.2e-08	1.25e-07	60.134	62
132	6.6	291.82	3.9e-08	6.3e-08	61.744	39
133	6.8	294.21	1.4e-08	2.4e-08	64.138	14
134	7	296.14	7e-09	1e-08	66.067	7
135	7.2	300	2e-09	3e-09	69.924	2
136	7.4	301	1e-09	1e-09	70.924	1
137	7.6	0	0	0	0	0
138	7.8	0	0	0	0	0
139	8	0	0	0	0	0
140	8.2	0	0	0	0	0
141	8.4	0	0	0	0	0
142	8.6	0	0	0	0	0
143	8.8	0	0	0	0	0
144	9	0	0	0	0	0
145	9.2	0	0	0	0	0
146	9.4	0	0	0	0	0
147	9.6	0	0	0	0	0
148	9.8	0	0	0	0	0
149	10	0	0	0	0	0
150	10.2	0	0	0	0	0
151	10.4	0	0	0	0	0
152	10.6	0	0	0	0	0
153	10.8	0	0	0	0	0
154	11	0	0	0	0	0
155	11.2	0	0	0	0	0
156	11.4	0	0	0	0	0
157	11.6	0	0	0	0	0
158	11.8	0	0	0	0	0
159	12	0	0	0	0	0
160	12.2	0	0	0	0	0
161	12.4	0	0	0	0	0
162	12.6	0	0	0	0	0
163	12.8	0	0	0	0	0
164	13	0	0	0	0	0
165	13.2	0	0	0	0	0
166	13.4	0	0	0	0	0
167	13.6	0	0	0	0	0
168	13.8	0	0	0	0	0
169	14	0	0	0	0	0
170	14.2	0	0	0	0	0
171	14.4	0	0	0	0	0
172	14.6	0	0	0	0	0
173	14.8	0	0	0	0	0
174	15	0	0	0	0	0
175	15.2	0	0	0	0	0
176	15.4	0	0	0	0	0
177	15.6	0	0	0	0	0
178	15.8	0	0	0	0	0
179	16	0	0	0	0	0
180	16.2	0	0	0	0	0
181	16.4	0	0	0	0	0
182	16.6	0	0	0	0	0
183	16.8	0	0	0	0	0
184	17	0	0	0	0	0
185	17.2	0	0	0	0	0
186	17.4	0	0	0	0	0
187	17.6	0	0	0	0	0
188	17.8	0	0	0	0	0
189	18	0	0	0	0	0
190	18.2	0	0	0	0	0
191	18.4	0	0	0	0	0
192	18.6	0	0	0	0	0
193	18.8	0	0	0	0	0
194	19	0	0	0	0	0
195	19.2	0	0	0	0	0
196	19.4	0	0	0	0	0
197	19.6	0	0	0	0	0
198	19.8	0	0	0	0	0
199	20	0	0	0	0	0
