# Supplementary material for: Quantifying the Potential for Future Gene Therapy to Lower Lifetime Risk of Polygenic Late-Onset Diseases
Source: MDPI journal article supplement (doi:10.3390/ijms20133352), 2019-07-08
Supplement: s2 [file s2 › SuppFiles/Results/LODsCommonLow/BreastCancer/1.000/ScatterData.csv]

Age	OR	Beta
29	0.8833	-0.12409
29	3.6802	1.303
29	5.0516	1.6197
29	3.9534	1.3746
30	2.3705	0.86311
31	0.39293	-0.93413
31	3.0413	1.1123
31	10.7	2.3702
31	0.86068	-0.15003
31	2.0629	0.72413
31	2.6426	0.97177
32	0.85337	-0.15856
32	6.4418	1.8628
32	5.1751	1.6439
33	4.2759	1.453
33	3.1301	1.1411
33	27.218	3.3039
34	10.204	2.3228
34	4.0527	1.3994
35	2.0962	0.74011
35	1.5046	0.40855
35	1.0109	0.010834
35	23.832	3.171
35	25.424	3.2357
35	2.835	1.042
35	7.6396	2.0333
36	1.0619	0.060033
36	3.2557	1.1804
36	20.432	3.0171
36	3.8552	1.3494
37	13.258	2.5846
37	3.8013	1.3353
37	1.7483	0.55867
37	81.943	4.406
37	1.94	0.66269
38	1.2438	0.21817
38	0.45936	-0.77792
38	2.3412	0.85065
38	4.748	1.5577
38	7.0066	1.9469
38	36.079	3.5857
38	5.3369	1.6746
39	31.707	3.4565
39	7.1492	1.967
39	28.672	3.3559
39	0.50046	-0.69223
39	49.831	3.9086
39	5.9208	1.7785
39	4.7433	1.5567
40	6.8149	1.9191
40	9.3844	2.239
40	3.1737	1.1549
40	17.502	2.8623
40	7.7772	2.0512
40	37.867	3.6341
40	4.0454	1.3976
40	0.71558	-0.33466
40	8.3394	2.121
41	20.998	3.0444
41	4.3716	1.4751
41	5.6612	1.7336
41	2.5263	0.92676
41	20.833	3.0365
41	12.095	2.4928
41	11.162	2.4125
41	13.924	2.6336
41	5.0057	1.6106
41	2.4744	0.906
42	1.7373	0.55233
42	2.488	0.91147
42	5.2496	1.6582
42	0.46848	-0.75826
42	8.0857	2.0901
42	6.5915	1.8858
42	14.071	2.6441
42	6.9563	1.9397
42	2.0855	0.73501
42	4.9151	1.5923
43	20.751	3.0326
43	12.689	2.5408
43	10.27	2.3292
43	4.5005	1.5042
43	10.03	2.3055
43	1.0321	0.031573
43	7.677	2.0382
43	5.9851	1.7893
43	0.88975	-0.11682
43	8.0383	2.0842
43	0.53811	-0.6197
43	5.8421	1.7651
44	64.313	4.1638
44	0.74505	-0.2943
44	0.41086	-0.8895
44	4.0489	1.3984
44	56.247	4.0298
44	4.3442	1.4688
44	2.7152	0.99886
44	1.5277	0.42379
44	0.49326	-0.70671
45	0.98736	-0.012725
45	9.742	2.2764
45	79.516	4.376
45	1.8428	0.61128
45	15.869	2.7644
45	4.3238	1.4641
45	12.451	2.5218
45	3.478	1.2464
45	0.89621	-0.10959
45	9.689	2.271
45	0.9461	-0.05541
45	9.1424	2.2129
45	1.814	0.59552
45	8.343	2.1214
45	2.5592	0.9397
45	0.5043	-0.68458
45	2.1477	0.76437
46	11.278	2.4228
46	3.7014	1.3087
46	8.5492	2.1458
46	25.061	3.2213
46	2.8821	1.0585
46	41.703	3.7306
46	0.26031	-1.3459
46	45.109	3.8091
46	2.0932	0.73868
46	10.344	2.3364
46	1.087	0.083422
46	8.2161	2.1061
46	0.22131	-1.5082
46	2.9656	1.0871
46	0.30594	-1.1844
47	5.7451	1.7483
47	0.48584	-0.72187
47	0.83678	-0.1782
47	2.0214	0.7038
47	2.3448	0.85219
47	1.0172	0.017062
47	0.78393	-0.24344
47	2.1742	0.77666
47	17.656	2.8711
47	8.2126	2.1057
47	0.5464	-0.6044
47	14.744	2.6908
47	0.88136	-0.12629
47	2.3757	0.86531
47	11.131	2.4097
47	2.0122	0.69923
48	13.894	2.6315
48	3.5602	1.2698
48	39.638	3.6798
48	0.20354	-1.5919
48	2.3258	0.84405
48	2.3232	0.84293
48	1.0874	0.083797
48	1.2038	0.18546
48	3.2166	1.1683
48	2.5651	0.942
48	0.71532	-0.33503
48	0.21863	-1.5204
48	23.133	3.1413
48	22.116	3.0963
48	5.5579	1.7152
48	1.2001	0.18238
48	0.96673	-0.033835
48	1.092	0.088048
48	2.7405	1.0081
48	5.8146	1.7604
48	1.7184	0.54139
48	35.695	3.575
48	0.84653	-0.16661
48	1.1841	0.169
49	6.897	1.9311
49	0.80505	-0.21686
49	0.20987	-1.5613
49	6.8858	1.9295
49	0.87426	-0.13438
49	1.5005	0.4058
49	5.376	1.682
49	6.1511	1.8166
49	3.5787	1.275
49	7.0972	1.9597
49	0.90918	-0.095208
49	1.8813	0.63195
49	63.782	4.1555
49	3.1244	1.1392
49	2.6938	0.99095
49	12.266	2.5068
49	3.4255	1.2312
49	52.253	3.9561
49	3.6652	1.2989
49	9.3965	2.2403
49	0.98573	-0.014371
49	4.1932	1.4335
50	1.1811	0.16643
50	0.29683	-1.2146
50	1.7811	0.57725
50	6.7914	1.9157
50	13.981	2.6377
50	8.9796	2.195
50	10.557	2.3568
50	2.9225	1.0724
50	3.7884	1.3319
50	2.084	0.73429
50	1.4906	0.39916
50	14.092	2.6456
50	0.54119	-0.61399
50	3.3754	1.2165
50	2.8923	1.062
50	4.8562	1.5803
50	20.785	3.0342
50	2.8646	1.0524
50	2.8972	1.0637
50	3.7102	1.3111
50	8.9042	2.1865
50	14.472	2.6722
50	2.8474	1.0464
50	0.89424	-0.11178
50	3.0644	1.1199
50	3.8777	1.3552
50	2.0868	0.73564
51	1.6809	0.51934
51	9.825	2.2849
51	22.927	3.1323
51	8.4471	2.1338
51	10.577	2.3586
51	1.7001	0.53071
51	0.72878	-0.31638
51	2.9044	1.0662
51	6.6961	1.9015
51	9.49	2.2502
51	2.438	0.8912
51	2.5842	0.94942
51	9.3695	2.2375
51	0.82107	-0.19715
51	6.51	1.8733
51	17.209	2.8454
51	0.87539	-0.13308
51	2.5607	0.94029
51	4.2017	1.4355
51	18.215	2.9023
51	0.52354	-0.64714
51	1.2219	0.20041
52	4.5825	1.5222
52	6.1134	1.8105
52	4.1744	1.429
52	0.60648	-0.50009
52	1.3288	0.28424
52	3.3499	1.2089
52	5.8838	1.7722
52	2.3541	0.85617
52	7.5275	2.0186
52	7.5809	2.0256
52	18.993	2.9441
52	4.3881	1.4789
52	4.1891	1.4325
52	2.0025	0.69439
52	1.9344	0.65982
52	10.128	2.3153
52	6.623	1.8905
52	8.3069	2.1171
52	4.9288	1.5951
52	9.6371	2.2656
52	6.2185	1.8275
52	4.253	1.4476
52	1.5097	0.41189
52	2.735	1.0061
52	8.9585	2.1926
52	1.7682	0.56997
52	2.4104	0.87978
53	1.3613	0.30842
53	40.932	3.7119
53	0.8405	-0.17376
53	15.278	2.7264
53	15.822	2.7614
53	24.009	3.1784
53	1.4769	0.38997
53	15.647	2.7503
53	7.1896	1.9726
53	4.985	1.6064
53	5.5515	1.7141
53	32.176	3.4712
53	3.8356	1.3443
53	1.3712	0.31568
53	8.6273	2.1549
53	16.537	2.8056
53	15.405	2.7347
53	6.2127	1.8266
53	19.516	2.9712
53	3.3857	1.2196
53	0.64404	-0.43999
53	0.84465	-0.16883
53	0.66941	-0.40136
53	3.7469	1.3209
53	19.267	2.9584
53	1.5947	0.4667
53	1.341	0.2934
53	1.4781	0.39076
53	3.7409	1.3193
53	16.923	2.8286
53	3.7173	1.313
53	18.636	2.9251
53	21.994	3.0908
53	2.2112	0.79354
53	15.251	2.7247
53	27.371	3.3095
53	2.0799	0.73234
53	0.43274	-0.83762
53	5.8365	1.7641
53	1.1175	0.11111
53	1.33	0.28515
54	12.124	2.4952
54	9.5976	2.2615
54	1.0982	0.093631
54	2.1387	0.7602
54	9.7265	2.2749
54	4.1389	1.4204
54	7.6003	2.0282
54	5.0401	1.6174
54	5.029	1.6152
54	0.81059	-0.20999
54	11.881	2.475
54	27.107	3.2998
54	0.54658	-0.60408
55	5.881	1.7717
55	10.248	2.3271
55	1.6448	0.49762
55	6.3438	1.8475
55	9.882	2.2907
55	0.28706	-1.2481
55	4.1338	1.4192
55	2.8332	1.0414
55	1.2559	0.22782
55	3.2095	1.1661
55	0.85386	-0.15799
55	1.9899	0.68807
55	2.3316	0.84656
55	1.5888	0.463
55	7.6118	2.0297
55	3.959	1.376
55	19.054	2.9473
55	14.803	2.6948
55	0.9997	-0.00029652
55	0.3777	-0.97366
55	0.6773	-0.38964
55	4.5183	1.5081
55	12.382	2.5162
55	0.78753	-0.23885
55	0.46419	-0.76746
55	1.9532	0.66945
55	5.3027	1.6682
55	17.855	2.8823
55	15.424	2.7359
55	4.3495	1.4701
55	1.7766	0.57471
56	0.87986	-0.12799
56	2.8016	1.0302
56	4.1754	1.4292
56	5.5876	1.7205
56	2.8729	1.0553
56	4.4421	1.4911
56	8.0757	2.0889
56	11.344	2.4287
56	2.9976	1.0978
56	1.0716	0.069107
56	2.0144	0.70033
56	5.2433	1.6569
56	0.11095	-2.1987
56	8.466	2.1361
56	2.4957	0.91457
56	5.4508	1.6958
56	3.0226	1.1061
56	0.86191	-0.1486
56	2.3381	0.84935
56	1.1594	0.14794
56	1.1919	0.17554
56	9.414	2.2422
56	2.6004	0.95566
56	3.3066	1.1959
56	20.211	3.0062
56	0.74744	-0.2911
57	0.63252	-0.45804
57	1.2645	0.23466
57	7.0886	1.9585
57	1.4271	0.35567
57	1.2752	0.24307
57	1.617	0.48057
57	4.0544	1.3998
57	8.0446	2.085
57	5.8775	1.7711
57	0.90058	-0.10471
57	15.818	2.7611
57	13.673	2.6154
57	26.621	3.2817
57	5.9643	1.7858
57	90.378	4.504
57	6.696	1.9015
57	7.497	2.0145
57	24.33	3.1917
57	1.1269	0.1195
57	1.602	0.47124
57	1.6312	0.4893
57	16.715	2.8163
57	1.9234	0.65407
57	1.7957	0.58541
57	2.3975	0.87441
57	4.0816	1.4065
57	2.7428	1.009
57	4.8021	1.5691
57	7.6127	2.0298
57	5.1421	1.6375
57	2.1658	0.77279
57	9.7386	2.2761
57	4.0413	1.3966
57	1.4911	0.39953
58	8.5445	2.1453
58	1.3897	0.32909
58	3.9347	1.3698
58	13.37	2.593
58	5.7699	1.7526
58	18.439	2.9145
58	5.3408	1.6754
58	4.2025	1.4357
58	1.8534	0.61701
58	6.0397	1.7983
58	13.104	2.5729
58	7.2569	1.982
58	1.6887	0.52397
58	0.38685	-0.94971
58	1.1397	0.13078
58	1.7807	0.57699
58	2.4778	0.90736
58	5.4919	1.7033
58	8.4492	2.1341
59	3.8794	1.3557
59	4.5904	1.524
59	0.92081	-0.0825
59	0.3509	-1.0472
59	4.6353	1.5337
59	2.6671	0.98098
59	2.8515	1.0478
59	4.4723	1.4979
59	6.8924	1.9304
59	2.1581	0.76924
59	5.6697	1.7351
59	8.4017	2.1284
59	1.7833	0.57848
59	2.317	0.84026
59	5.933	1.7805
59	1.9104	0.64732
59	11.443	2.4374
59	0.37866	-0.97113
59	1.949	0.6673
59	2.7651	1.0171
59	1.6758	0.51627
59	1.4144	0.34674
59	5.5059	1.7058
59	2.1279	0.75514
59	1.0634	0.061462
59	1.5021	0.4069
59	2.4617	0.90086
59	8.0188	2.0818
59	9.7595	2.2782
59	5.4116	1.6885
59	0.37065	-0.99251
60	27.35	3.3087
60	4.9195	1.5932
60	4.3877	1.4788
60	23.37	3.1515
60	1.4302	0.35785
60	4.5972	1.5254
60	0.84013	-0.17419
60	3.5495	1.2668
60	27.19	3.3029
60	1.0836	0.080299
60	1.3907	0.32981
60	0.33834	-1.0837
60	7.9983	2.0792
60	0.35698	-1.0301
60	19.725	2.9819
60	4.7379	1.5556
60	35.666	3.5742
60	0.26291	-1.336
60	7.8241	2.0572
61	2.9637	1.0865
61	23.935	3.1753
61	1.6177	0.48102
61	0.95012	-0.051167
61	54.379	3.996
61	2.5408	0.93249
61	1.3631	0.30977
61	2.9995	1.0984
61	1.2902	0.25476
61	31.485	3.4495
61	13.456	2.5994
61	6.8077	1.9181
61	1.5919	0.46491
61	21.186	3.0534
61	1.5272	0.42341
61	3.5873	1.2774
61	1.8022	0.589
61	10.247	2.3269
61	9.8011	2.2825
61	13.791	2.624
61	6.4798	1.8687
61	6.6737	1.8982
61	0.34243	-1.0717
61	13.145	2.5761
61	2.5903	0.95179
61	0.25785	-1.3554
61	1.5807	0.45785
62	0.39655	-0.92495
62	3.1338	1.1423
62	45.817	3.8247
62	1.2728	0.24125
62	7.0754	1.9566
62	3.2783	1.1873
62	8.2244	2.1071
62	0.96564	-0.034967
62	0.35642	-1.0316
62	1.3854	0.326
62	0.69942	-0.35751
62	8.2342	2.1083
62	4.2381	1.4441
62	1.3188	0.27672
62	1.0022	0.0022469
62	0.84725	-0.16576
62	3.0482	1.1146
62	1.2565	0.22833
62	0.147	-1.9173
62	1.442	0.366
62	4.5825	1.5222
62	1.5661	0.44859
62	2.7991	1.0293
62	0.60892	-0.49606
62	14.766	2.6924
63	1.0559	0.054406
63	5.4166	1.6895
63	1.7791	0.57611
63	3.0329	1.1095
63	3.4235	1.2307
63	3.6623	1.2981
63	5.8535	1.767
63	27.549	3.316
63	1.318	0.27614
63	0.65349	-0.42543
63	1.5854	0.46081
63	5.4592	1.6973
63	16.63	2.8112
63	10.18	2.3204
63	6.8334	1.9218
63	1.7122	0.53776
63	50.431	3.9206
63	4.7348	1.5549
63	4.4545	1.4939
63	2.6855	0.98788
63	0.43433	-0.83394
63	1.7196	0.54207
63	11.854	2.4727
63	3.254	1.1799
63	2.4068	0.8783
64	1.5506	0.43861
64	1.7248	0.54512
64	2.0439	0.71486
64	2.7977	1.0288
64	1.0357	0.03503
64	3.6937	1.3066
64	6.7249	1.9058
64	28.33	3.3439
64	1.5895	0.46343
64	0.38709	-0.9491
64	1.7275	0.54665
64	3.4775	1.2463
64	2.7939	1.0274
64	7.895	2.0662
64	2.1038	0.74374
64	0.9192	-0.084251
64	18.687	2.9278
64	1.6058	0.47363
64	2.6903	0.98966
64	2.303	0.83423
64	2.9425	1.0793
64	1.6704	0.51304
64	2.1984	0.78773
64	1.4466	0.36919
64	0.916	-0.087733
64	0.93714	-0.06492
64	11.414	2.4348
64	1.9225	0.65361
64	6.2917	1.8392
64	3.0741	1.123
64	2.4175	0.88275
64	2.6145	0.96107
64	10.692	2.3695
64	0.57314	-0.55663
65	3.248	1.178
65	11.071	2.4044
65	2.1513	0.76609
65	0.22873	-1.4752
65	9.7015	2.2723
65	6.8191	1.9197
65	36.05	3.5849
65	11.728	2.462
65	0.7726	-0.258
65	7.0102	1.9474
65	3.9008	1.3612
65	3.7979	1.3345
65	0.78601	-0.24079
65	14.436	2.6697
65	9.0809	2.2062
65	2.1767	0.77782
65	5.3175	1.671
65	11.647	2.455
65	6.0097	1.7934
65	1.103	0.098045
65	1.1422	0.13299
65	1.8522	0.61635
66	5.2397	1.6563
66	8.0015	2.0796
66	2.4723	0.90514
66	5.9931	1.7906
66	15.622	2.7487
66	1.7527	0.56116
66	0.42379	-0.85851
66	8.8553	2.181
66	3.3449	1.2074
66	13.974	2.6372
66	1.1127	0.10681
66	1.3038	0.26529
66	1.8619	0.62161
66	5.7648	1.7518
66	2.2188	0.79696
66	1.7481	0.55851
66	17.032	2.8351
66	5.1762	1.6441
66	9.4369	2.2446
66	3.3269	1.2021
66	0.43658	-0.82878
66	1.6116	0.47724
66	12.464	2.5228
66	3.9486	1.3734
66	1.1243	0.11712
66	1.976	0.68107
66	4.0172	1.3906
66	8.2371	2.1087
67	2.4306	0.88816
67	8.342	2.1213
67	3.8742	1.3543
67	1.3249	0.28131
67	3.394	1.222
67	5.6107	1.7247
67	5.196	1.6479
67	1.8814	0.632
67	0.384	-0.95712
67	9.0161	2.199
67	1.3522	0.30173
67	14.406	2.6677
67	15.98	2.7714
67	1.2113	0.1917
67	3.7284	1.316
67	0.54057	-0.61512
67	0.73802	-0.30379
67	2.0633	0.7243
67	0.70832	-0.34486
67	0.64309	-0.44148
67	54.547	3.9991
67	10.381	2.3399
67	1.3854	0.32598
67	1.9542	0.66997
67	7.6341	2.0326
67	2.1829	0.78065
67	3.3069	1.196
68	1.2275	0.20497
68	2.822	1.0375
68	4.0373	1.3956
68	4.4924	1.5024
68	0.77546	-0.25429
68	17.806	2.8796
68	3.7497	1.3217
68	10.417	2.3435
68	0.84632	-0.16686
68	2.5749	0.9458
68	3.1376	1.1435
68	6.151	1.8166
68	11.994	2.4844
68	13.513	2.6037
68	5.3018	1.668
68	0.79046	-0.23514
68	0.8552	-0.15642
68	0.19039	-1.6587
68	1.57	0.45106
68	0.086441	-2.4483
69	0.99339	-0.0066282
69	1.545	0.43502
69	7.0374	1.9512
69	5.1906	1.6468
69	1.4269	0.35552
69	2.3218	0.84233
69	2.209	0.79253
69	4.4504	1.493
69	1.1394	0.13053
69	2.492	0.9131
69	1.7128	0.53812
69	2.4975	0.91528
69	0.37954	-0.9688
69	7.9613	2.0746
69	0.59593	-0.51763
69	10.867	2.3857
69	1.4273	0.35582
69	9.3209	2.2323
69	2.0255	0.70582
69	1.9388	0.66209
69	29.156	3.3727
69	22.878	3.1302
70	14.376	2.6655
70	10.027	2.3053
70	11.76	2.4647
70	3.858	1.3502
70	1.3523	0.30184
70	4.1613	1.4258
70	0.33667	-1.0886
70	9.2874	2.2287
70	4.1964	1.4342
70	3.4631	1.2422
70	0.16572	-1.7975
70	20.92	3.0407
70	2.4841	0.90993
70	2.8998	1.0646
70	7.7554	2.0484
70	9.43	2.2439
70	2.6852	0.98775
70	3.4159	1.2284
70	13.015	2.5661
70	3.5078	1.255
70	3.7761	1.3287
70	8.9023	2.1863
71	1.5303	0.42543
71	5.8755	1.7708
71	10.413	2.3431
71	0.81936	-0.19923
71	6.7067	1.9031
71	1.2907	0.25521
71	1.0466	0.045575
71	5.1811	1.645
71	3.3505	1.2091
71	3.0143	1.1034
71	18.599	2.9231
71	3.1508	1.1477
71	2.6846	0.98752
71	10.027	2.3052
71	2.4017	0.87616
71	3.2845	1.1892
71	1.1417	0.13249
71	1.144	0.13453
71	3.3514	1.2094
71	4.0312	1.3941
71	5.2632	1.6607
71	13.585	2.609
71	9.6027	2.262
71	20.957	3.0425
71	2.2434	0.80801
71	14.055	2.643
71	14.355	2.6641
71	1.0376	0.036912
72	1.1356	0.12718
72	8.4811	2.1378
72	1.9002	0.64197
72	0.70452	-0.35024
72	0.4902	-0.71293
72	1.5894	0.46333
72	5.7635	1.7515
72	3.7937	1.3333
72	4.4065	1.4831
72	1.0215	0.021283
72	1.6718	0.51391
72	0.46453	-0.76673
72	3.3807	1.2181
72	3.6353	1.2907
72	6.0924	1.807
72	5.9689	1.7866
72	3.0171	1.1043
72	6.0683	1.8031
72	0.22731	-1.4815
72	1.2769	0.24442
72	4.3302	1.4656
72	0.11284	-2.1818
72	0.61362	-0.48838
72	6.6296	1.8915
72	1.9951	0.69069
72	2.6375	0.96982
72	0.8835	-0.12386
72	1.2677	0.23721
72	7.1119	1.9618
72	2.7542	1.0131
72	5.9572	1.7846
72	2.0919	0.73807
72	2.9874	1.0944
72	1.4313	0.35858
73	1.5921	0.46508
73	1.2292	0.20637
73	3.9096	1.3634
73	0.2839	-1.2591
73	6.2847	1.8381
73	6.5971	1.8866
73	3.6482	1.2942
73	0.94052	-0.061319
73	0.10877	-2.2186
73	4.1597	1.4254
73	13.557	2.6069
73	9.3001	2.23
73	0.1343	-2.0076
73	2.5524	0.93703
73	3.3316	1.2035
73	2.9198	1.0715
73	1.3651	0.31124
73	2.6789	0.98542
73	1.536	0.42919
73	1.0735	0.070953
73	2.5739	0.94541
73	7.1729	1.9703
73	2.0039	0.69512
73	18.462	2.9157
74	2.2223	0.79856
74	6.2483	1.8323
74	1.6632	0.50872
74	0.3199	-1.1397
74	4.4209	1.4863
74	22.08	3.0947
74	1.656	0.5044
74	0.87138	-0.13768
74	5.0352	1.6165
74	13.766	2.6222
74	3.011	1.1023
74	2.6023	0.95641
74	4.7502	1.5582
74	1.579	0.45681
74	1.21	0.19059
74	0.78644	-0.24023
74	2.0642	0.72476
74	0.60754	-0.49833
74	1.0668	0.064673
74	1.3758	0.31906
74	1.4516	0.37269
74	1.968	0.67703
74	2.0636	0.72445
74	8.8674	2.1824
74	4.0683	1.4032
74	5.2243	1.6533
74	24.683	3.2061
74	5.4204	1.6902
75	28.576	3.3526
75	7.0046	1.9466
75	7.6799	2.0386
75	5.4386	1.6935
75	1.2159	0.19546
75	1.4958	0.40269
75	1.5671	0.4492
75	5.3911	1.6847
75	2.1383	0.76003
75	9.2116	2.2205
75	5.2328	1.6549
75	1.2176	0.19686
75	8.5582	2.1469
75	0.7874	-0.23902
75	3.2232	1.1704
75	1.6464	0.49861
75	9.3508	2.2355
75	0.8097	-0.2111
75	1.0385	0.037766
75	0.74528	-0.294
76	2.4483	0.89541
76	2.6131	0.96053
76	5.8538	1.7671
76	1.3096	0.2697
76	10.013	2.3039
76	6.2511	1.8328
76	3.6425	1.2927
76	2.8016	1.0302
76	2.328	0.84501
76	9.2817	2.228
76	4.1945	1.4338
76	1.2877	0.25286
76	3.1799	1.1568
76	6.4747	1.8679
76	7.8136	2.0559
76	9.1439	2.2131
76	0.71117	-0.34084
76	4.5746	1.5205
76	17.808	2.8797
76	7.0733	1.9563
76	7.1399	1.9657
76	2.8725	1.0552
76	1.8627	0.62203
76	4.4964	1.5033
76	0.19901	-1.6144
76	1.3583	0.3062
76	1.0144	0.014297
76	3.4574	1.2405
76	1.648	0.49956
76	3.5874	1.2774
76	3.7893	1.3322
76	36.054	3.585
76	5.5561	1.7149
76	5.1792	1.6446
77	2.4607	0.90044
77	1.0288	0.028419
77	0.68355	-0.38045
77	8.3089	2.1173
77	4.9371	1.5968
77	2.4098	0.87955
77	1.1077	0.10229
77	7.3581	1.9958
77	5.3684	1.6805
77	0.75579	-0.27999
77	0.85955	-0.15134
77	19.313	2.9608
77	4.6351	1.5337
77	8.5556	2.1466
77	3.1526	1.1482
77	6.3624	1.8504
77	2.6098	0.95929
77	1.5777	0.45596
77	6.9124	1.9333
77	4.6079	1.5278
77	7.4022	2.0018
77	3.4254	1.2312
77	16.461	2.801
77	1.5523	0.43975
77	6.0137	1.794
77	0.73399	-0.30926
77	2.0665	0.72585
77	8.4284	2.1316
77	23.973	3.1769
77	23.535	3.1585
78	7.4378	2.0066
78	3.042	1.1125
78	3.6831	1.3037
78	1.6784	0.51785
78	0.73906	-0.30238
78	0.89174	-0.11458
78	2.0938	0.739
78	14.306	2.6607
78	1.997	0.69166
78	8.9387	2.1904
78	6.4227	1.8598
78	4.2896	1.4562
78	2.36	0.85866
78	6.3581	1.8497
78	7.2099	1.9755
78	4.0252	1.3926
78	25.762	3.2489
78	4.1691	1.4277
78	0.36222	-1.0155
78	4.0282	1.3933
78	12.697	2.5414
78	1.7025	0.53209
78	6.6214	1.8903
78	1.5903	0.46389
78	2.2028	0.78973
79	0.73065	-0.31383
79	0.44059	-0.81965
79	5.6342	1.7289
79	0.22535	-1.4901
79	2.1613	0.77071
79	2.9199	1.0715
79	6.0577	1.8013
79	1.4796	0.39175
79	1.9161	0.6503
79	3.7459	1.3207
79	25.936	3.2556
79	0.16852	-1.7807
79	1.2733	0.24163
79	3.6362	1.2909
79	1.6867	0.52277
79	3.6242	1.2876
79	3.1852	1.1585
79	1.812	0.59444
79	0.074829	-2.5926
79	13.407	2.5957
79	3.1114	1.1351
79	10.8	2.3796
79	1.4815	0.39306
79	1.6338	0.49093
79	1.8352	0.60718
79	8.774	2.1718
79	0.87791	-0.13022
79	4.603	1.5267
80	3.6575	1.2968
80	0.672	-0.3975
80	12.577	2.5319
80	1.6972	0.529
80	1.1885	0.17272
80	1.5189	0.41799
80	2.9384	1.0778
80	0.82598	-0.19118
80	4.7843	1.5653
80	2.2898	0.82845
80	2.9979	1.0979
80	2.9446	1.08
80	5.6521	1.732
80	4.9376	1.5969
80	1.7484	0.55868
80	4.7412	1.5563
80	5.1646	1.6418
80	0.68843	-0.37335
80	2.369	0.86245
80	3.6083	1.2832
80	0.53402	-0.62733
80	0.61326	-0.48896
80	0.49598	-0.70122
80	5.1141	1.632
81	2.2633	0.81682
81	12.325	2.5117
81	0.71797	-0.33133
81	4.1782	1.4299
81	1.1199	0.1132
81	2.3331	0.84721
81	1.2654	0.23542
81	7.0704	1.9559
81	12.044	2.4886
81	0.29437	-1.2229
81	3.5404	1.2642
81	2.6928	0.99059
81	0.30265	-1.1952
81	1.3508	0.30067
81	0.4119	-0.88697
81	2.4666	0.90283
81	0.8554	-0.15619
81	0.6541	-0.4245
82	7.377	1.9984
82	23.563	3.1597
82	2.8434	1.045
82	6.9263	1.9353
82	0.52732	-0.63994
82	12.562	2.5307
82	2.567	0.94274
82	3.8364	1.3445
82	0.40035	-0.91542
82	3.6018	1.2814
82	8.0395	2.0844
82	0.55658	-0.58595
82	0.8945	-0.11149
82	3.5555	1.2685
82	4.2514	1.4472
82	0.67647	-0.39086
82	4.3014	1.459
82	0.61207	-0.49091
82	1.9815	0.68387
82	3.1927	1.1609
82	1.2859	0.25147
82	3.5291	1.261
82	3.8949	1.3597
83	5.463	1.698
83	1.3907	0.32982
83	6.8626	1.9261
83	1.7732	0.5728
83	2.3569	0.85733
83	0.60665	-0.49981
83	1.8261	0.60218
83	7.7371	2.046
83	14.143	2.6492
83	1.1882	0.17241
83	2.1658	0.77278
83	2.6391	0.97043
83	8.2912	2.1152
83	1.9921	0.68917
83	2.9818	1.0925
83	0.90873	-0.095711
83	5.7665	1.7521
83	1.8592	0.62013
83	1.3314	0.28624
83	4.3657	1.4738
83	3.652	1.2953
83	2.9992	1.0984
83	12.177	2.4996
83	7.0816	1.9575
83	1.548	0.43698
83	0.33831	-1.0838
84	0.13625	-1.9932
84	2.6791	0.98548
84	3.0352	1.1103
84	6.6988	1.9019
84	1.8331	0.60601
84	18.761	2.9318
84	6.0927	1.8071
84	9.9169	2.2942
84	0.72496	-0.32164
84	3.0017	1.0992
84	1.3404	0.29296
84	0.98202	-0.018149
84	1.4277	0.35607
84	8.2306	2.1079
84	11.374	2.4313
84	1.344	0.29568
84	1.7456	0.55713
84	1.4519	0.37286
84	6.2545	1.8333
84	3.2055	1.1649
84	0.18906	-1.6657
84	3.1501	1.1474
84	0.36886	-0.99735
84	3.6359	1.2909
85	3.0138	1.1032
85	1.23	0.20704
85	13.946	2.6352
85	2.0333	0.70966
85	17.406	2.8568
85	0.57154	-0.55942
85	9.1227	2.2108
85	0.12204	-2.1034
85	6.0634	1.8023
85	4.3819	1.4775
85	3.6897	1.3055
85	2.8898	1.0612
85	1.7838	0.57874
85	4.3257	1.4646
85	5.1021	1.6296
85	1.0621	0.060221
85	0.38193	-0.96253
85	0.63623	-0.4522
85	2.8897	1.0612
85	0.93031	-0.072238
85	1.1118	0.10601
85	1.2374	0.213
85	6.0756	1.8043
85	6.6738	1.8982
86	5.863	1.7687
86	4.53	1.5107
86	13.359	2.5922
86	2.8107	1.0334
86	1.4891	0.39815
86	3.1096	1.1345
86	2.4726	0.90528
86	3.2319	1.1731
86	3.8939	1.3594
86	5.1143	1.632
86	4.277	1.4533
86	4.7915	1.5668
86	6.2681	1.8355
86	3.2745	1.1862
86	6.3242	1.8444
86	2.4461	0.89451
86	1.1539	0.14316
86	1.5385	0.43082
86	1.397	0.33429
87	0.43899	-0.82328
87	22.469	3.1121
87	6.407	1.8574
87	1.7522	0.56089
87	3.3343	1.2043
87	0.51997	-0.65398
87	3.5361	1.263
87	1.1963	0.17927
87	0.5568	-0.58555
87	0.94263	-0.059079
87	5.802	1.7582
87	1.7544	0.5621
87	4.0758	1.4051
87	2.4348	0.88986
87	5.0111	1.6117
87	3.8173	1.3395
87	5.0415	1.6177
87	12.779	2.5478
87	2.6489	0.97413
87	0.95691	-0.044047
87	1.0767	0.0739
87	0.43102	-0.84159
88	9.3241	2.2326
88	2.2945	0.83051
88	1.1149	0.10875
88	4.0271	1.393
88	2.2132	0.79444
88	11.482	2.4408
88	1.6541	0.50326
88	0.85868	-0.15235
88	4.0296	1.3937
88	7.9926	2.0785
88	0.61057	-0.49336
88	9.9804	2.3006
88	1.6692	0.51237
88	7.0162	1.9482
88	1.4977	0.40392
88	3.0842	1.1263
88	1.6449	0.49766
89	2.706	0.99549
89	5.2633	1.6607
89	8.0095	2.0806
89	17.659	2.8712
89	3.3297	1.2029
89	3.4012	1.2241
89	2.6632	0.97953
89	5.551	1.714
89	2.6078	0.95851
89	5.5116	1.7069
89	1.1267	0.11926
89	3.0121	1.1026
89	9.9189	2.2944
89	2.2989	0.83243
89	2.973	1.0896
90	13.167	2.5777
90	3.2932	1.1918
90	3.8029	1.3358
90	2.0014	0.69387
90	4.1239	1.4168
90	6.2803	1.8374
90	4.5179	1.5081
90	2.676	0.98433
90	1.7711	0.57162
90	0.85875	-0.15228
90	1.7441	0.55623
90	4.3999	1.4816
90	13.139	2.5756
90	1.8648	0.62314
90	0.93021	-0.072345
91	5.1042	1.6301
91	3.3999	1.2237
91	0.12335	-2.0927
91	1.7918	0.58322
91	0.2367	-1.441
91	8.6512	2.1577
91	3.9827	1.382
91	8.3764	2.1254
91	3.7554	1.3232
91	2.6794	0.98559
91	0.53876	-0.61848
91	15.418	2.7355
91	9.7142	2.2736
91	9.5527	2.2568
92	1.6336	0.49081
92	3.1756	1.1555
92	1.3221	0.27919
92	8.3264	2.1194
92	1.6826	0.52034
92	5.3059	1.6688
92	1.9977	0.692
92	1.8271	0.60274
92	5.0866	1.6266
92	5.3593	1.6788
92	1.7817	0.57757
92	2.8057	1.0317
93	2.7645	1.0169
93	5.7482	1.7489
93	7.9833	2.0774
93	6.5198	1.8748
93	1.0165	0.016375
93	1.055	0.053537
93	8.5215	2.1426
93	0.73262	-0.31113
94	1.3346	0.28867
94	2.1395	0.76057
94	5.1571	1.6404
94	1.1551	0.14421
94	1.7415	0.55475
94	0.47565	-0.74306
94	1.7534	0.56154
94	2.0086	0.69744
95	1.7577	0.56402
95	7.7733	2.0507
95	6.2216	1.828
95	2.5281	0.92748
95	2.0042	0.69525
95	2.8853	1.0596
95	9.9233	2.2949
96	0.62161	-0.47544
96	6.7034	1.9026
96	3.5655	1.2713
96	4.0772	1.4054
96	8.1403	2.0968
96	3.4518	1.2389
97	1.876	0.62914
98	1.6741	0.5153
98	3.7803	1.3298
99	1.0982	0.093686
99	3.6438	1.293
100	1.141	0.13193
101	0.5618	-0.5766
101	1.3195	0.27724
102	6.9582	1.9399
103	1.2331	0.20955
103	4.3975	1.481
105	7.0918	1.9589
