# Supplementary material for: Quantifying the Potential for Future Gene Therapy to Lower Lifetime Risk of Polygenic Late-Onset Diseases
Source: MDPI journal article supplement (doi:10.3390/ijms20133352), 2019-07-08
Supplement: s2 [file s2 › SuppFiles/Results/LODsCommonLow/BreastCancer/DensityPostAnalysis.csv]

age	A..1..	A..2..	A..3..	A..4..	A..5..	A..6..	A..7..	A..8..	A..9..	A..10..	A..11..	A..12..	A..13..	A..14..	A..15..	A..16..	A..17..	A..18..	A..19..	A..20..
1	0.0000000e+00	0.0000000e+00	0.0000000e+00	0.0000000e+00	0.0000000e+00	0.0000000e+00	0.0000000e+00	0.0000000e+00	0.0000000e+00	0.0000000e+00	0.0000000e+00	0.0000000e+00	0.0000000e+00	0.0000000e+00	0.0000000e+00	0.0000000e+00	0.0000000e+00	0.0000000e+00	0.0000000e+00	0.0000000e+00
2	0.0000000e+00	0.0000000e+00	0.0000000e+00	0.0000000e+00	0.0000000e+00	0.0000000e+00	0.0000000e+00	0.0000000e+00	0.0000000e+00	0.0000000e+00	0.0000000e+00	0.0000000e+00	0.0000000e+00	0.0000000e+00	0.0000000e+00	0.0000000e+00	0.0000000e+00	0.0000000e+00	0.0000000e+00	0.0000000e+00
3	0.0000000e+00	0.0000000e+00	0.0000000e+00	0.0000000e+00	0.0000000e+00	0.0000000e+00	0.0000000e+00	0.0000000e+00	0.0000000e+00	0.0000000e+00	0.0000000e+00	0.0000000e+00	0.0000000e+00	0.0000000e+00	0.0000000e+00	0.0000000e+00	0.0000000e+00	0.0000000e+00	0.0000000e+00	0.0000000e+00
4	0.0000000e+00	0.0000000e+00	0.0000000e+00	0.0000000e+00	0.0000000e+00	0.0000000e+00	0.0000000e+00	0.0000000e+00	0.0000000e+00	0.0000000e+00	0.0000000e+00	0.0000000e+00	0.0000000e+00	0.0000000e+00	0.0000000e+00	0.0000000e+00	0.0000000e+00	0.0000000e+00	0.0000000e+00	0.0000000e+00
5	0.0000000e+00	0.0000000e+00	0.0000000e+00	0.0000000e+00	0.0000000e+00	0.0000000e+00	0.0000000e+00	0.0000000e+00	0.0000000e+00	0.0000000e+00	0.0000000e+00	0.0000000e+00	0.0000000e+00	0.0000000e+00	0.0000000e+00	0.0000000e+00	0.0000000e+00	0.0000000e+00	0.0000000e+00	0.0000000e+00
6	0.0000000e+00	0.0000000e+00	0.0000000e+00	0.0000000e+00	0.0000000e+00	0.0000000e+00	0.0000000e+00	0.0000000e+00	0.0000000e+00	0.0000000e+00	0.0000000e+00	0.0000000e+00	0.0000000e+00	0.0000000e+00	0.0000000e+00	0.0000000e+00	0.0000000e+00	0.0000000e+00	0.0000000e+00	0.0000000e+00
7	0.0000000e+00	0.0000000e+00	0.0000000e+00	0.0000000e+00	0.0000000e+00	0.0000000e+00	0.0000000e+00	0.0000000e+00	0.0000000e+00	0.0000000e+00	0.0000000e+00	0.0000000e+00	0.0000000e+00	0.0000000e+00	0.0000000e+00	0.0000000e+00	0.0000000e+00	0.0000000e+00	0.0000000e+00	0.0000000e+00
8	0.0000000e+00	0.0000000e+00	0.0000000e+00	0.0000000e+00	0.0000000e+00	0.0000000e+00	0.0000000e+00	0.0000000e+00	0.0000000e+00	0.0000000e+00	0.0000000e+00	0.0000000e+00	0.0000000e+00	0.0000000e+00	0.0000000e+00	0.0000000e+00	0.0000000e+00	0.0000000e+00	0.0000000e+00	0.0000000e+00
9	0.0000000e+00	0.0000000e+00	0.0000000e+00	0.0000000e+00	0.0000000e+00	0.0000000e+00	0.0000000e+00	0.0000000e+00	0.0000000e+00	0.0000000e+00	0.0000000e+00	0.0000000e+00	0.0000000e+00	0.0000000e+00	0.0000000e+00	0.0000000e+00	0.0000000e+00	0.0000000e+00	0.0000000e+00	0.0000000e+00
10	0.0000000e+00	0.0000000e+00	0.0000000e+00	0.0000000e+00	0.0000000e+00	0.0000000e+00	0.0000000e+00	0.0000000e+00	0.0000000e+00	0.0000000e+00	0.0000000e+00	0.0000000e+00	0.0000000e+00	0.0000000e+00	0.0000000e+00	0.0000000e+00	0.0000000e+00	0.0000000e+00	0.0000000e+00	0.0000000e+00
11	0.0000000e+00	0.0000000e+00	0.0000000e+00	0.0000000e+00	0.0000000e+00	0.0000000e+00	0.0000000e+00	0.0000000e+00	0.0000000e+00	0.0000000e+00	0.0000000e+00	0.0000000e+00	0.0000000e+00	0.0000000e+00	0.0000000e+00	0.0000000e+00	0.0000000e+00	0.0000000e+00	0.0000000e+00	0.0000000e+00
12	0.0000000e+00	0.0000000e+00	0.0000000e+00	0.0000000e+00	0.0000000e+00	0.0000000e+00	0.0000000e+00	0.0000000e+00	0.0000000e+00	0.0000000e+00	0.0000000e+00	0.0000000e+00	0.0000000e+00	0.0000000e+00	0.0000000e+00	0.0000000e+00	0.0000000e+00	0.0000000e+00	0.0000000e+00	0.0000000e+00
13	0.0000000e+00	0.0000000e+00	0.0000000e+00	0.0000000e+00	0.0000000e+00	0.0000000e+00	0.0000000e+00	0.0000000e+00	0.0000000e+00	0.0000000e+00	0.0000000e+00	0.0000000e+00	0.0000000e+00	0.0000000e+00	0.0000000e+00	0.0000000e+00	0.0000000e+00	0.0000000e+00	0.0000000e+00	0.0000000e+00
14	0.0000000e+00	0.0000000e+00	0.0000000e+00	0.0000000e+00	0.0000000e+00	0.0000000e+00	0.0000000e+00	0.0000000e+00	0.0000000e+00	0.0000000e+00	0.0000000e+00	0.0000000e+00	0.0000000e+00	0.0000000e+00	0.0000000e+00	0.0000000e+00	0.0000000e+00	0.0000000e+00	0.0000000e+00	0.0000000e+00
15	0.0000000e+00	0.0000000e+00	0.0000000e+00	0.0000000e+00	0.0000000e+00	0.0000000e+00	0.0000000e+00	0.0000000e+00	0.0000000e+00	0.0000000e+00	0.0000000e+00	0.0000000e+00	0.0000000e+00	0.0000000e+00	0.0000000e+00	0.0000000e+00	0.0000000e+00	0.0000000e+00	0.0000000e+00	0.0000000e+00
16	0.0000000e+00	0.0000000e+00	0.0000000e+00	0.0000000e+00	0.0000000e+00	0.0000000e+00	0.0000000e+00	0.0000000e+00	0.0000000e+00	0.0000000e+00	0.0000000e+00	0.0000000e+00	0.0000000e+00	0.0000000e+00	0.0000000e+00	0.0000000e+00	0.0000000e+00	0.0000000e+00	0.0000000e+00	0.0000000e+00
17	0.0000000e+00	0.0000000e+00	0.0000000e+00	0.0000000e+00	0.0000000e+00	0.0000000e+00	0.0000000e+00	0.0000000e+00	0.0000000e+00	0.0000000e+00	0.0000000e+00	0.0000000e+00	0.0000000e+00	0.0000000e+00	0.0000000e+00	0.0000000e+00	0.0000000e+00	0.0000000e+00	0.0000000e+00	0.0000000e+00
18	0.0000000e+00	0.0000000e+00	0.0000000e+00	0.0000000e+00	0.0000000e+00	0.0000000e+00	0.0000000e+00	0.0000000e+00	0.0000000e+00	0.0000000e+00	0.0000000e+00	0.0000000e+00	0.0000000e+00	0.0000000e+00	0.0000000e+00	0.0000000e+00	0.0000000e+00	0.0000000e+00	0.0000000e+00	0.0000000e+00
19	0.0000000e+00	0.0000000e+00	0.0000000e+00	0.0000000e+00	0.0000000e+00	0.0000000e+00	0.0000000e+00	0.0000000e+00	0.0000000e+00	0.0000000e+00	0.0000000e+00	0.0000000e+00	0.0000000e+00	0.0000000e+00	0.0000000e+00	0.0000000e+00	0.0000000e+00	0.0000000e+00	0.0000000e+00	0.0000000e+00
20	0.0000000e+00	0.0000000e+00	0.0000000e+00	0.0000000e+00	0.0000000e+00	0.0000000e+00	0.0000000e+00	0.0000000e+00	0.0000000e+00	0.0000000e+00	0.0000000e+00	0.0000000e+00	0.0000000e+00	0.0000000e+00	0.0000000e+00	0.0000000e+00	0.0000000e+00	0.0000000e+00	0.0000000e+00	0.0000000e+00
21	0.0000000e+00	0.0000000e+00	0.0000000e+00	0.0000000e+00	0.0000000e+00	0.0000000e+00	0.0000000e+00	0.0000000e+00	0.0000000e+00	0.0000000e+00	0.0000000e+00	0.0000000e+00	0.0000000e+00	0.0000000e+00	0.0000000e+00	0.0000000e+00	0.0000000e+00	0.0000000e+00	0.0000000e+00	0.0000000e+00
22	0.0000000e+00	0.0000000e+00	0.0000000e+00	0.0000000e+00	0.0000000e+00	0.0000000e+00	0.0000000e+00	0.0000000e+00	0.0000000e+00	0.0000000e+00	0.0000000e+00	0.0000000e+00	0.0000000e+00	0.0000000e+00	0.0000000e+00	0.0000000e+00	0.0000000e+00	0.0000000e+00	0.0000000e+00	0.0000000e+00
23	0.0000000e+00	0.0000000e+00	0.0000000e+00	0.0000000e+00	0.0000000e+00	0.0000000e+00	0.0000000e+00	0.0000000e+00	0.0000000e+00	0.0000000e+00	0.0000000e+00	0.0000000e+00	0.0000000e+00	0.0000000e+00	0.0000000e+00	0.0000000e+00	0.0000000e+00	0.0000000e+00	0.0000000e+00	0.0000000e+00
24	0.0000000e+00	0.0000000e+00	0.0000000e+00	0.0000000e+00	0.0000000e+00	0.0000000e+00	0.0000000e+00	0.0000000e+00	0.0000000e+00	0.0000000e+00	0.0000000e+00	0.0000000e+00	0.0000000e+00	0.0000000e+00	0.0000000e+00	0.0000000e+00	0.0000000e+00	0.0000000e+00	0.0000000e+00	0.0000000e+00
25	0.0000000e+00	0.0000000e+00	0.0000000e+00	0.0000000e+00	0.0000000e+00	0.0000000e+00	0.0000000e+00	0.0000000e+00	0.0000000e+00	0.0000000e+00	0.0000000e+00	0.0000000e+00	0.0000000e+00	0.0000000e+00	0.0000000e+00	0.0000000e+00	0.0000000e+00	0.0000000e+00	0.0000000e+00	0.0000000e+00
26	9.2021810e-05	9.2223659e-05	9.2347373e-05	9.2398533e-05	2.3035987e-05	2.3086516e-05	2.3117486e-05	2.3130293e-05	5.7593991e-06	5.7720323e-06	5.7797752e-06	5.7829771e-06	1.4398513e-06	1.4430096e-06	1.4449454e-06	1.4457459e-06	3.5996256e-07	3.6075214e-07	3.6123607e-07	3.6143619e-07
27	3.6749449e-04	3.6835676e-04	3.6891798e-04	3.6915956e-04	9.2362801e-05	9.2579516e-05	9.2720568e-05	9.2781286e-05	2.3097173e-05	2.3151367e-05	2.3186640e-05	2.3201823e-05	5.7743185e-06	5.7878671e-06	5.7966853e-06	5.8004812e-06	1.4435753e-06	1.4469624e-06	1.4491670e-06	1.4501159e-06
28	6.6070324e-04	6.6235463e-04	6.6347785e-04	6.6401271e-04	1.6676462e-04	1.6718144e-04	1.6746494e-04	1.6759994e-04	4.1712272e-05	4.1816530e-05	4.1887442e-05	4.1921209e-05	1.0428151e-05	1.0454215e-05	1.0471943e-05	1.0480385e-05	2.6070235e-06	2.6135396e-06	2.6179716e-06	2.6200820e-06
29	9.7359257e-04	9.7615557e-04	9.7797924e-04	9.7893543e-04	2.4686591e-04	2.4751579e-04	2.4797820e-04	2.4822066e-04	6.1762792e-05	6.1925383e-05	6.2041073e-05	6.2101732e-05	1.5440879e-05	1.5481527e-05	1.5510450e-05	1.5525615e-05	3.8601886e-06	3.8703506e-06	3.8775813e-06	3.8813725e-06
30	1.3071453e-03	1.3107606e-03	1.3134357e-03	1.3149454e-03	3.3307178e-04	3.3399300e-04	3.3467463e-04	3.3505932e-04	8.3352326e-05	8.3582863e-05	8.3753444e-05	8.3849712e-05	2.0838411e-05	2.0896047e-05	2.0938692e-05	2.0962760e-05	5.2095461e-06	5.2239548e-06	5.2346161e-06	5.2406329e-06
31	1.6614217e-03	1.6662725e-03	1.6699274e-03	1.6721676e-03	4.2556970e-04	4.2681223e-04	4.2774844e-04	4.2832224e-04	1.0653031e-04	1.0684134e-04	1.0707570e-04	1.0721933e-04	2.6633116e-05	2.6710876e-05	2.6769466e-05	2.6805376e-05	6.6581863e-06	6.6776261e-06	6.6922734e-06	6.7012508e-06
32	2.0393353e-03	2.0455831e-03	2.0503828e-03	2.0535067e-03	5.2532061e-04	5.2693001e-04	5.2816637e-04	5.2897107e-04	1.3154045e-04	1.3194345e-04	1.3225303e-04	1.3245453e-04	3.2885936e-05	3.2986687e-05	3.3064085e-05	3.3114461e-05	8.2213425e-06	8.2465299e-06	8.2658791e-06	8.2784728e-06
33	2.4414515e-03	2.4493084e-03	2.4554303e-03	2.4595942e-03	6.3270935e-04	6.3474548e-04	6.3633199e-04	6.3741108e-04	1.5848272e-04	1.5899274e-04	1.5939013e-04	1.5966042e-04	3.9621876e-05	3.9749384e-05	3.9848735e-05	3.9916310e-05	9.9052637e-06	9.9371399e-06	9.9619772e-06	9.9788706e-06
34	2.8690635e-03	2.8787990e-03	2.8863774e-03	2.8917698e-03	7.4834921e-04	7.5088854e-04	7.5286526e-04	7.5427177e-04	1.8751499e-04	1.8815128e-04	1.8864659e-04	1.8899902e-04	4.6880423e-05	4.7039499e-05	4.7163331e-05	4.7251442e-05	1.1719818e-05	1.1759586e-05	1.1790543e-05	1.1812571e-05
35	3.3225139e-03	3.3344728e-03	3.3436954e-03	3.3505194e-03	8.7263691e-04	8.7577784e-04	8.7820008e-04	8.7999237e-04	2.1874148e-04	2.1952880e-04	2.2013598e-04	2.2058525e-04	5.4687649e-05	5.4884490e-05	5.5036290e-05	5.5148611e-05	1.3671520e-05	1.3720729e-05	1.3758678e-05	1.3786758e-05
36	3.8045243e-03	3.8190430e-03	3.8301934e-03	3.8385949e-03	1.0066702e-03	1.0105118e-03	1.0134622e-03	1.0156852e-03	2.5244339e-04	2.5340676e-04	2.5414662e-04	2.5470409e-04	6.3113887e-05	6.3354741e-05	6.3539716e-05	6.3679090e-05	1.5777949e-05	1.5838161e-05	1.5884403e-05	1.5919245e-05
37	4.3170066e-03	4.3345956e-03	4.3478753e-03	4.3580770e-03	1.1513994e-03	1.1560906e-03	1.1596325e-03	1.1623534e-03	2.8886619e-04	2.9004314e-04	2.9093173e-04	2.9161436e-04	7.2220533e-05	7.2514785e-05	7.2736945e-05	7.2907612e-05	1.8054448e-05	1.8128009e-05	1.8183547e-05	1.8226212e-05
38	4.8587627e-03	4.8800157e-03	4.8957201e-03	4.9079567e-03	1.3069561e-03	1.3126729e-03	1.3168972e-03	1.3201887e-03	3.2805049e-04	3.2948543e-04	3.3054575e-04	3.3137194e-04	8.2017766e-05	8.2376525e-05	8.2641622e-05	8.2848180e-05	2.0503557e-05	2.0593243e-05	2.0659515e-05	2.0711152e-05
39	5.4331363e-03	5.4587020e-03	5.4772247e-03	5.4916436e-03	1.4748350e-03	1.4817749e-03	1.4868029e-03	1.4907169e-03	3.7038146e-04	3.7212430e-04	3.7338701e-04	3.7436995e-04	9.2601930e-05	9.3037670e-05	9.3353370e-05	9.3599123e-05	2.3149354e-05	2.3258284e-05	2.3337205e-05	2.3398640e-05
40	6.0432388e-03	6.0738082e-03	6.0956700e-03	6.1125295e-03	1.6565949e-03	1.6649747e-03	1.6709675e-03	1.6755891e-03	4.1626279e-04	4.1836843e-04	4.1987429e-04	4.2103559e-04	1.0407400e-04	1.0460045e-04	1.0497695e-04	1.0526729e-04	2.6017073e-05	2.6148679e-05	2.6242797e-05	2.6315380e-05
41	6.6860538e-03	6.7223795e-03	6.7480333e-03	6.7677353e-03	1.8520602e-03	1.8621226e-03	1.8692287e-03	1.8746863e-03	4.6566232e-04	4.6819229e-04	4.6997899e-04	4.7135118e-04	1.1642598e-04	1.1705853e-04	1.1750524e-04	1.1784832e-04	2.9104707e-05	2.9262835e-05	2.9374507e-05	2.9460271e-05
42	7.3666357e-03	7.4097317e-03	7.4399216e-03	7.4627150e-03	2.0636024e-03	2.0756749e-03	2.0841319e-03	2.0905170e-03	5.1919374e-04	5.2223111e-04	5.2435887e-04	5.2596533e-04	1.2981138e-04	1.3057080e-04	1.3110279e-04	1.3150445e-04	3.2450620e-05	3.2640462e-05	3.2773451e-05	3.2873857e-05
43	8.0825725e-03	8.1334084e-03	8.1689852e-03	8.1952739e-03	2.2914326e-03	2.3058447e-03	2.3159308e-03	2.3233838e-03	5.7692736e-04	5.8055598e-04	5.8309542e-04	5.8497189e-04	1.4424785e-04	1.4515511e-04	1.4579004e-04	1.4625921e-04	3.6059210e-05	3.6286007e-05	3.6444728e-05	3.6562011e-05
44	8.8370727e-03	8.8969183e-03	8.9387829e-03	8.9691144e-03	2.5376621e-03	2.5548475e-03	2.5668693e-03	2.5755793e-03	6.3941793e-04	6.4374813e-04	6.4677730e-04	6.4897198e-04	1.5987418e-04	1.6095686e-04	1.6171425e-04	1.6226299e-04	3.9965159e-05	4.0235807e-05	4.0425138e-05	4.0562310e-05
45	9.6303116e-03	9.7006956e-03	9.7497661e-03	9.7848590e-03	2.8036286e-03	2.8241191e-03	2.8384048e-03	2.8486212e-03	7.0702859e-04	7.1219597e-04	7.1579858e-04	7.1837499e-04	1.7678127e-04	1.7807329e-04	1.7897407e-04	1.7961826e-04	4.4191171e-05	4.4514146e-05	4.4739319e-05	4.4900352e-05
46	1.0464523e-02	1.0547513e-02	1.0604819e-02	1.0645288e-02	3.0915686e-03	3.1160867e-03	3.1330165e-03	3.1449727e-03	7.8035619e-04	7.8654489e-04	7.9081824e-04	7.9383613e-04	1.9511849e-04	1.9666590e-04	1.9773440e-04	1.9848898e-04	4.8774562e-05	4.9161374e-05	4.9428471e-05	4.9617098e-05
47	1.1331971e-02	1.1429516e-02	1.1496381e-02	1.1543221e-02	3.4004161e-03	3.4296868e-03	3.4497510e-03	3.4638065e-03	8.5916100e-04	8.6655662e-04	8.7162612e-04	8.7517744e-04	2.1482601e-04	2.1667522e-04	2.1794281e-04	2.1883079e-04	5.3700356e-05	5.4162606e-05	5.4479467e-05	5.4701435e-05
48	1.2243836e-02	1.2358465e-02	1.2436194e-02	1.2490592e-02	3.7360310e-03	3.7710083e-03	3.7947263e-03	3.8113251e-03	9.4497658e-04	9.5382360e-04	9.5982274e-04	9.6402115e-04	2.3628750e-04	2.3849966e-04	2.3999972e-04	2.4104952e-04	5.9064423e-05	5.9617394e-05	5.9992361e-05	6.0254777e-05
49	1.3193668e-02	1.3328444e-02	1.3418705e-02	1.3481847e-02	4.0983220e-03	4.1401872e-03	4.1682250e-03	4.1878386e-03	1.0378271e-03	1.0484287e-03	1.0555288e-03	1.0604956e-03	2.5950920e-04	2.6216014e-04	2.6393551e-04	2.6517747e-04	6.4868289e-05	6.5530932e-05	6.5974714e-05	6.6285159e-05
50	1.4179585e-02	1.4338100e-02	1.4442892e-02	1.4515950e-02	4.4890315e-03	4.5392149e-03	4.5723902e-03	4.5955194e-03	1.1382130e-03	1.1509372e-03	1.1593490e-03	1.1652135e-03	2.8461648e-04	2.8779824e-04	2.8990164e-04	2.9136809e-04	7.1143252e-05	7.1938571e-05	7.2464340e-05	7.2830898e-05
51	1.5202965e-02	1.5388967e-02	1.5511011e-02	1.5595283e-02	4.9114974e-03	4.9715876e-03	5.0110153e-03	5.0382405e-03	1.2470559e-03	1.2623131e-03	1.2723240e-03	1.2792366e-03	3.1184008e-04	3.1565532e-04	3.1815866e-04	3.1988723e-04	7.7946938e-05	7.8900586e-05	7.9526316e-05	7.9958387e-05
52	1.6258263e-02	1.6476713e-02	1.6618543e-02	1.6715765e-02	5.3666673e-03	5.4387751e-03	5.4855918e-03	5.5176835e-03	1.3646763e-03	1.3830124e-03	1.3949173e-03	1.4030778e-03	3.4126052e-04	3.4584578e-04	3.4882280e-04	3.5086348e-04	8.5299412e-05	8.6445515e-05	8.7189634e-05	8.7699708e-05
53	1.6602048e-02	1.6847009e-02	1.7004733e-02	1.7111686e-02	5.5238894e-03	5.6053937e-03	5.6578722e-03	5.6934578e-03	1.4054489e-03	1.4261861e-03	1.4395383e-03	1.4485923e-03	3.5145955e-04	3.5664529e-04	3.5998426e-04	3.6224840e-04	8.7848157e-05	8.9144345e-05	8.9978928e-05	9.0544857e-05
54	1.6864486e-02	1.7137217e-02	1.7312277e-02	1.7429517e-02	5.6479807e-03	5.7393193e-03	5.7979476e-03	5.8372119e-03	1.4376932e-03	1.4609434e-03	1.4758673e-03	1.4858620e-03	3.5952554e-04	3.6533975e-04	3.6907177e-04	3.7157117e-04	8.9863811e-05	9.1317080e-05	9.2249903e-05	9.2874629e-05
55	1.7117520e-02	1.7419781e-02	1.7614518e-02	1.7743256e-02	5.7703221e-03	5.8722142e-03	5.9378604e-03	5.9812577e-03	1.4695271e-03	1.4954760e-03	1.5121941e-03	1.5232461e-03	3.6748904e-04	3.7397814e-04	3.7815889e-04	3.8092270e-04	9.1853822e-05	9.3475774e-05	9.4520750e-05	9.5211563e-05
56	1.7363750e-02	1.7697587e-02	1.7914109e-02	1.8056179e-02	5.8921166e-03	6.0053988e-03	6.0788723e-03	6.1270815e-03	1.5012637e-03	1.5301271e-03	1.5488476e-03	1.5611309e-03	3.7542838e-04	3.8264639e-04	3.8732791e-04	3.9039966e-04	9.3837767e-05	9.5641898e-05	9.6812037e-05	9.7579816e-05
57	1.7599368e-02	1.7966072e-02	1.8207469e-02	1.8364198e-02	6.0116479e-03	6.1369079e-03	6.2193649e-03	6.2729009e-03	1.5324588e-03	1.5643895e-03	1.5854090e-03	1.5990561e-03	3.8323242e-04	3.9121754e-04	3.9647403e-04	3.9988686e-04	9.5787870e-05	9.7783728e-05	9.9097573e-05	9.9950601e-05
58	1.7827862e-02	1.8229797e-02	1.8498775e-02	1.8671964e-02	6.1306394e-03	6.2688567e-03	6.3613529e-03	6.4209088e-03	1.5635623e-03	1.5988133e-03	1.6224036e-03	1.6375928e-03	3.9101377e-04	3.9982930e-04	4.0572873e-04	4.0952722e-04	9.7732267e-05	9.9935673e-05	1.0141021e-04	1.0235963e-04
59	1.8045951e-02	1.8485097e-02	1.8784036e-02	1.8975919e-02	6.2475509e-03	6.3995844e-03	6.5030779e-03	6.5695082e-03	1.5941748e-03	1.6329688e-03	1.6593771e-03	1.6763279e-03	3.9867246e-04	4.0837411e-04	4.1497830e-04	4.1921739e-04	9.9645981e-05	1.0207086e-04	1.0372154e-04	1.0478107e-04
60	1.8253469e-02	1.8731250e-02	1.9062005e-02	1.9275102e-02	6.3622184e-03	6.5287479e-03	6.6440323e-03	6.7183067e-03	1.6242530e-03	1.6667675e-03	1.6961992e-03	1.7151612e-03	4.0619773e-04	4.1682986e-04	4.2419022e-04	4.2893229e-04	1.0152632e-04	1.0418375e-04	1.0602342e-04	1.0720867e-04
61	1.8450602e-02	1.8968680e-02	1.9333373e-02	1.9569908e-02	6.4747757e-03	6.6565822e-03	6.7845621e-03	6.8675684e-03	1.6538335e-03	1.7002718e-03	1.7329614e-03	1.7541634e-03	4.1359867e-04	4.2521219e-04	4.3338734e-04	4.3868966e-04	1.0337555e-04	1.0627825e-04	1.0832157e-04	1.0964684e-04
62	1.8636665e-02	1.9196940e-02	1.9596932e-02	1.9860241e-02	6.5849443e-03	6.7829082e-03	6.9242384e-03	7.0172741e-03	1.6828451e-03	1.7334367e-03	1.7695550e-03	1.7933311e-03	4.2085752e-04	4.3350980e-04	4.4254251e-04	4.4848862e-04	1.0518924e-04	1.0835156e-04	1.1060920e-04	1.1209537e-04
63	1.8810103e-02	1.9415151e-02	1.9852872e-02	2.0145798e-02	6.6921578e-03	6.9074185e-03	7.0631485e-03	7.1673643e-03	1.7111438e-03	1.7661846e-03	1.8060038e-03	1.8326512e-03	4.2793824e-04	4.4170335e-04	4.5166169e-04	4.5832590e-04	1.0695838e-04	1.1039882e-04	1.1288779e-04	1.1455344e-04
64	1.8969425e-02	1.9622724e-02	2.0100241e-02	2.0425300e-02	6.7957530e-03	7.0297959e-03	7.2008653e-03	7.3173170e-03	1.7385582e-03	1.7984335e-03	1.8421982e-03	1.8719900e-03	4.3479799e-04	4.4977226e-04	4.6071742e-04	4.6816810e-04	1.0867226e-04	1.1241489e-04	1.1515050e-04	1.1701270e-04
65	1.9110992e-02	1.9818000e-02	2.0336732e-02	2.0695837e-02	6.8940345e-03	7.1490784e-03	7.3362039e-03	7.4657463e-03	1.7646478e-03	1.8299307e-03	1.8778287e-03	1.9109874e-03	4.4132655e-04	4.5765337e-04	4.6963234e-04	4.7792509e-04	1.1030334e-04	1.1438400e-04	1.1737798e-04	1.1945063e-04
66	1.9234783e-02	2.0001864e-02	2.0563500e-02	2.0958855e-02	6.9871189e-03	7.2657644e-03	7.4697812e-03	7.6133957e-03	1.7894455e-03	1.8608084e-03	1.9130584e-03	1.9498390e-03	4.4753218e-04	4.6537971e-04	4.7844720e-04	4.8764585e-04	1.1185368e-04	1.1631440e-04	1.1958041e-04	1.2187947e-04
67	1.9341106e-02	2.0176527e-02	2.0783096e-02	2.1216138e-02	7.0754863e-03	7.3811053e-03	7.6030042e-03	7.7614222e-03	1.8130827e-03	1.8913971e-03	1.9482584e-03	1.9888527e-03	4.5344776e-04	4.7303401e-04	4.8725488e-04	4.9740743e-04	1.1333150e-04	1.1822675e-04	1.2178101e-04	1.2431847e-04
68	1.9423657e-02	2.0335586e-02	2.0989702e-02	2.1462922e-02	7.1559874e-03	7.4919567e-03	7.7329438e-03	7.9072855e-03	1.8347363e-03	1.9208760e-03	1.9826631e-03	2.0273629e-03	4.5886738e-04	4.8041092e-04	4.9586387e-04	5.0704329e-04	1.1468533e-04	1.2006974e-04	1.2393192e-04	1.2672600e-04
69	1.9483123e-02	2.0481066e-02	2.1186426e-02	2.1701995e-02	7.2292236e-03	7.5995108e-03	7.8612348e-03	8.0525372e-03	1.8545683e-03	1.9495610e-03	2.0167030e-03	2.0657793e-03	4.6383160e-04	4.8758947e-04	5.0438185e-04	5.1665593e-04	1.1592532e-04	1.2186312e-04	1.2606004e-04	1.2912769e-04
70	1.9514365e-02	2.0608253e-02	2.1370652e-02	2.1930024e-02	7.2926210e-03	7.7014127e-03	7.9863255e-03	8.1953657e-03	1.8719057e-03	1.9768363e-03	2.0499692e-03	2.1036266e-03	4.6817203e-04	4.9441566e-04	5.1270650e-04	5.2612647e-04	1.1700938e-04	1.2356841e-04	1.2813980e-04	1.3149383e-04
71	1.9517589e-02	2.0718556e-02	2.1544809e-02	2.2149770e-02	7.3465819e-03	7.7986355e-03	8.1096442e-03	8.3373565e-03	1.8868591e-03	2.0029622e-03	2.0828401e-03	2.1413246e-03	4.7191636e-04	5.0095456e-04	5.2093257e-04	5.3555994e-04	1.1794444e-04	1.2520185e-04	1.3019489e-04	1.3385066e-04
72	1.9485995e-02	2.0806334e-02	2.1705044e-02	2.2357565e-02	7.3877922e-03	7.8883769e-03	8.2291079e-03	8.4765004e-03	1.8985624e-03	2.0272058e-03	2.1147691e-03	2.1783456e-03	4.7484793e-04	5.0702285e-04	5.2892322e-04	5.4482430e-04	1.1867634e-04	1.2671765e-04	1.3219111e-04	1.3616518e-04
73	1.9417774e-02	2.0871253e-02	2.1851146e-02	2.2554012e-02	7.4155982e-03	7.9706781e-03	8.3448966e-03	8.6133195e-03	1.9068487e-03	2.0495821e-03	2.1458087e-03	2.2148310e-03	4.7692501e-04	5.1262429e-04	5.3669169e-04	5.5395497e-04	1.1919467e-04	1.2811675e-04	1.3413175e-04	1.3844625e-04
74	1.9310597e-02	2.0910415e-02	2.1981465e-02	2.2738498e-02	7.4287161e-03	8.0441602e-03	8.4561893e-03	8.7474169e-03	1.9113803e-03	2.0697317e-03	2.1757452e-03	2.2506770e-03	4.7806307e-04	5.1766899e-04	5.4418445e-04	5.6292594e-04	1.1947829e-04	1.2937667e-04	1.3600346e-04	1.4068736e-04
75	1.9162904e-02	2.0920879e-02	2.2093610e-02	2.2910960e-02	7.4261283e-03	8.1073899e-03	8.5618538e-03	8.8785985e-03	1.9118867e-03	2.0872803e-03	2.2042839e-03	2.2858311e-03	4.7819446e-04	5.2206329e-04	5.5132782e-04	5.7172412e-04	1.1951032e-04	1.3047401e-04	1.3778780e-04	1.4288524e-04
76	1.8975089e-02	2.0902330e-02	2.2188503e-02	2.3073377e-02	7.4081385e-03	8.1605599e-03	8.6626996e-03	9.0081671e-03	1.9084500e-03	2.1022852e-03	2.2316441e-03	2.3206418e-03	4.7733968e-04	5.2582158e-04	5.5817670e-04	5.8043673e-04	1.1929587e-04	1.3141237e-04	1.3949851e-04	1.4506169e-04
77	1.8735134e-02	2.0843092e-02	2.2255386e-02	2.3216687e-02	7.3681779e-03	8.1971984e-03	8.7526271e-03	9.1306887e-03	1.8993370e-03	2.1130383e-03	2.2562143e-03	2.3536694e-03	4.7506512e-04	5.2851643e-04	5.6432783e-04	5.8870345e-04	1.1872659e-04	1.3208495e-04	1.4103481e-04	1.4712668e-04
78	1.8444594e-02	2.0747287e-02	2.2300285e-02	2.3347269e-02	7.3079313e-03	8.2202812e-03	8.8355942e-03	9.2504199e-03	1.8850052e-03	2.1203365e-03	2.2790501e-03	2.3860501e-03	4.7148527e-04	5.3034729e-04	5.7004539e-04	5.9680867e-04	1.1783110e-04	1.3254158e-04	1.4246272e-04	1.4915126e-04
79	1.8098986e-02	2.0612355e-02	2.2320019e-02	2.3463270e-02	7.2250293e-03	8.2283544e-03	8.9100459e-03	9.3664263e-03	1.8648308e-03	2.1237960e-03	2.2997454e-03	2.4175404e-03	4.6644404e-04	5.3121817e-04	5.7522781e-04	6.0469149e-04	1.1657038e-04	1.3275827e-04	1.4375685e-04	1.5112020e-04
80	1.7693617e-02	2.0436060e-02	2.2310833e-02	2.3561479e-02	7.1168495e-03	8.2199339e-03	8.9740180e-03	9.4770613e-03	1.8381200e-03	2.1230216e-03	2.3177843e-03	2.4477090e-03	4.5976786e-04	5.3103011e-04	5.7974600e-04	6.1224397e-04	1.1490108e-04	1.3271030e-04	1.4488494e-04	1.5300655e-04
81	1.7223062e-02	2.0213619e-02	2.2266653e-02	2.3636776e-02	6.9800099e-03	8.1919965e-03	9.0240319e-03	9.5793033e-03	1.8039719e-03	2.1172078e-03	2.3322460e-03	2.4757549e-03	4.5123124e-04	5.2958159e-04	5.8336953e-04	6.1926572e-04	1.1276685e-04	1.3234733e-04	1.4578943e-04	1.5476022e-04
82	1.6682105e-02	1.9941026e-02	2.2184664e-02	2.3687860e-02	6.8120523e-03	8.1428160e-03	9.0589939e-03	9.6728165e-03	1.7617421e-03	2.1059060e-03	2.3428491e-03	2.5015968e-03	4.4067297e-04	5.2676033e-04	5.8602806e-04	6.2573636e-04	1.1012742e-04	1.3164129e-04	1.4645273e-04	1.5637613e-04
83	1.6067653e-02	1.9613000e-02	2.2061562e-02	2.3712936e-02	6.6110893e-03	8.0698343e-03	9.0773032e-03	9.7567668e-03	1.7109270e-03	2.0884452e-03	2.3491747e-03	2.5250175e-03	4.2796705e-04	5.2239851e-04	5.8761672e-04	6.3160162e-04	1.0695131e-04	1.3055025e-04	1.4684865e-04	1.5784071e-04
84	1.5383945e-02	1.9227632e-02	2.1897734e-02	2.3711888e-02	6.3785769e-03	7.9722681e-03	9.0793607e-03	9.8315551e-03	1.6518957e-03	2.0646227e-03	2.3513327e-03	2.5461327e-03	4.1320571e-04	5.1644540e-04	5.8816312e-04	6.3689045e-04	1.0326158e-04	1.2906155e-04	1.4698406e-04	1.5916120e-04
85	1.4631353e-02	1.8776710e-02	2.1687028e-02	2.3676563e-02	6.1129763e-03	7.8449058e-03	9.0608362e-03	9.8920634e-03	1.5842083e-03	2.0330464e-03	2.3481608e-03	2.5635775e-03	3.9627881e-04	5.0855259e-04	5.8737629e-04	6.4126130e-04	9.9030723e-05	1.2708812e-04	1.4678630e-04	1.6025225e-04
86	1.3816465e-02	1.8261270e-02	2.1432098e-02	2.3608889e-02	5.8172053e-03	7.6886202e-03	9.0236476e-03	9.9401512e-03	1.5086226e-03	1.9939517e-03	2.3401751e-03	2.5778593e-03	3.7737590e-04	4.9877902e-04	5.8538542e-04	6.4484118e-04	9.4306113e-05	1.2464471e-04	1.4628762e-04	1.6114560e-04
87	1.2941220e-02	1.7673563e-02	2.1126169e-02	2.3503152e-02	5.4911872e-03	7.4992033e-03	8.9642049e-03	9.9728003e-03	1.4250956e-03	1.9462242e-03	2.3264275e-03	2.5881823e-03	3.5648609e-04	4.8684585e-04	5.8195328e-04	6.4743097e-04	8.9085045e-05	1.2166164e-04	1.4542877e-04	1.6179149e-04
88	1.2006613e-02	1.7008227e-02	2.0761113e-02	2.3353009e-02	5.1342609e-03	7.2730481e-03	8.8778552e-03	9.9862005e-03	1.3334268e-03	1.8888945e-03	2.3056815e-03	2.5935315e-03	3.3355916e-04	4.7251043e-04	5.7677045e-04	6.4877666e-04	8.3354987e-05	1.1807831e-04	1.4413243e-04	1.6212647e-04
89	1.1018807e-02	1.6269491e-02	2.0334433e-02	2.3158235e-02	4.7486797e-03	7.0115219e-03	8.7633547e-03	9.9803039e-03	1.2341890e-03	1.8223051e-03	2.2776090e-03	2.5938960e-03	3.0873830e-04	4.5585837e-04	5.6975485e-04	6.4887554e-04	7.7151731e-05	1.1391610e-04	1.4237810e-04	1.6214986e-04
90	9.9868498e-03	1.5461732e-02	1.9842352e-02	2.2917841e-02	4.3377408e-03	6.7157298e-03	8.6184315e-03	9.9542554e-03	1.1282209e-03	1.7467219e-03	2.2416034e-03	2.5890434e-03	2.8223328e-04	4.3695614e-04	5.6075463e-04	6.4766945e-04	7.0527711e-05	1.0919165e-04	1.4012784e-04	1.6184712e-04
91	8.9252800e-03	1.4589597e-02	1.9283120e-02	5.3416684e-03	3.9074348e-03	6.3872391e-03	8.4420359e-03	9.9078840e-03	1.0170691e-03	1.6625393e-03	2.1973838e-03	2.5789306e-03	2.5443092e-04	4.1590231e-04	5.4969951e-04	6.4514758e-04	6.3579599e-05	1.0392959e-04	1.3736410e-04	1.6121556e-04
92	7.8510796e-03	1.3654144e-02	1.8647188e-02	0.0000000e+00	3.4644273e-03	6.0251318e-03	8.2284007e-03	9.8358542e-03	9.0244548e-04	1.5694810e-03	2.1434085e-03	2.5621326e-03	2.2575937e-04	3.9262765e-04	5.3620365e-04	6.4095334e-04	5.6414400e-05	9.8112665e-05	1.3399048e-04	1.6016610e-04
93	6.7865667e-03	1.2658854e-02	3.3706466e-03	0.0000000e+00	3.0185714e-03	5.6304838e-03	7.9759833e-03	9.7358940e-03	7.8691225e-04	1.4678125e-03	2.0792614e-03	2.5380530e-03	1.9685959e-04	3.6719845e-04	5.2016289e-04	6.3493748e-04	4.9192287e-05	9.1757437e-05	1.2998098e-04	1.5866144e-04
94	5.7543963e-03	1.1608756e-02	0.0000000e+00	0.0000000e+00	2.5799062e-03	5.2046294e-03	7.6847410e-03	9.6047780e-03	6.7308109e-04	1.3578547e-03	2.0049000e-03	2.5058254e-03	1.6838492e-04	3.3969495e-04	5.0156649e-04	6.2688316e-04	4.2076520e-05	8.4883977e-05	1.2533292e-04	1.5664742e-04
95	4.7784388e-03	1.0513506e-02	0.0000000e+00	0.0000000e+00	2.1594647e-03	4.7512474e-03	7.3559245e-03	9.4400063e-03	5.6383428e-04	1.2405464e-03	1.9206253e-03	2.4647771e-03	1.4105642e-04	3.1035189e-04	4.8048963e-04	6.1662203e-04	3.5247283e-05	7.7550962e-05	1.2006511e-04	1.5408197e-04
96	3.8788310e-03	9.3883543e-03	0.0000000e+00	0.0000000e+00	1.7669955e-03	4.2768502e-03	6.9910995e-03	9.2401602e-03	4.6172945e-04	1.1175737e-03	1.8268279e-03	2.4145246e-03	1.1551400e-04	2.7959103e-04	4.5702996e-04	6.0405807e-04	2.8864465e-05	6.9863788e-05	1.1420196e-04	1.5094113e-04
97	3.0757117e-03	8.2523073e-03	0.0000000e+00	0.0000000e+00	1.4124366e-03	3.7896466e-03	6.5907344e-03	9.0008328e-03	3.6937914e-04	9.9106497e-04	1.7236029e-03	2.3538897e-03	9.2411316e-05	2.4794475e-04	4.3121118e-04	5.8889639e-04	2.3091391e-05	6.1955499e-05	1.0774943e-04	1.4715121e-04
98	2.3817190e-03	7.1286934e-03	0.0000000e+00	0.0000000e+00	1.1026669e-03	3.3003786e-03	6.1561335e-03	8.7206038e-03	2.8860670e-04	8.6382513e-04	1.6112766e-03	2.2824886e-03	7.2204634e-05	2.1611479e-04	4.0311481e-04	5.7104098e-04	1.8042054e-05	5.4001448e-05	1.0072787e-04	1.4268824e-04
99	1.8005543e-03	5.7710548e-03	0.0000000e+00	0.0000000e+00	8.4043226e-04	2.8195932e-03	5.6881672e-03	8.3986943e-03	2.2015468e-04	7.3860399e-04	1.4900387e-03	2.2000724e-03	5.5079821e-05	1.8478906e-04	3.7278820e-04	5.5042935e-04	1.3762881e-05	4.6173530e-05	9.3149168e-05	1.3753664e-04
100	1.3298277e-03	0.0000000e+00	0.0000000e+00	0.0000000e+00	6.2575705e-04	2.3587775e-03	5.1897749e-03	8.0348568e-03	1.6405685e-04	6.1840872e-04	1.3606209e-03	2.1065257e-03	4.1045442e-05	1.5471990e-04	3.4041423e-04	5.2703241e-04	1.0255992e-05	3.8659737e-05	8.5059031e-05	1.3168917e-04
101	9.6026060e-04	0.0000000e+00	0.0000000e+00	0.0000000e+00	4.5552633e-04	1.9288619e-03	4.6686331e-03	7.6315225e-03	1.1952777e-04	5.0612345e-04	1.2250253e-03	2.0024723e-03	2.9905109e-05	1.2662896e-04	3.0649377e-04	5.0100619e-04	7.4722944e-06	3.1640375e-05	7.6582623e-05	1.2518482e-04
102	6.7694914e-04	0.0000000e+00	0.0000000e+00	0.0000000e+00	3.2378413e-04	1.5412189e-03	4.1351767e-03	7.1916605e-03	8.5032969e-05	4.0475861e-04	1.0859901e-03	1.8886912e-03	2.1275026e-05	1.0126955e-04	2.7171187e-04	4.7254559e-04	5.3158711e-06	2.5303652e-05	6.7891117e-05	1.1807231e-04
103	4.6470134e-04	0.0000000e+00	0.0000000e+00	0.0000000e+00	2.2410347e-04	1.2024985e-03	3.5991833e-03	6.7134881e-03	5.8906100e-05	3.1607942e-04	9.4605339e-04	1.7646554e-03	1.4738364e-05	7.9083381e-05	2.3670348e-04	4.4151850e-04	3.6825556e-06	1.9759924e-05	5.9143183e-05	1.1031865e-04
104	3.0991119e-04	0.0000000e+00	0.0000000e+00	0.0000000e+00	1.5068646e-04	9.1588852e-04	3.0727438e-03	6.1988661e-03	3.9643126e-05	2.4095520e-04	8.0838832e-04	1.6308196e-03	9.9188924e-06	6.0288098e-05	2.0226248e-04	4.0803857e-04	2.4783287e-06	1.5063549e-05	5.0537184e-05	1.0195228e-04
105	2.0050416e-04	0.0000000e+00	0.0000000e+00	0.0000000e+00	9.8302364e-05	6.8170919e-04	2.5696879e-03	5.6538192e-03	2.5884967e-05	1.7950758e-04	6.7664990e-04	1.4887630e-03	6.4766334e-06	4.4914287e-05	1.6930342e-04	3.7250085e-04	1.6182314e-06	1.1222143e-05	4.2301624e-05	9.3071900e-05
106	1.2522488e-04	0.0000000e+00	0.0000000e+00	0.0000000e+00	6.1907772e-05	4.9611963e-04	2.1007485e-03	5.0846688e-03	1.6316370e-05	1.3075695e-04	5.5367183e-04	1.3401118e-03	4.0825522e-06	3.2716963e-05	1.3853536e-04	3.3531211e-04	1.0200432e-06	8.1744740e-06	3.4613656e-05	8.3779175e-05
107	7.5216740e-05	0.0000000e+00	0.0000000e+00	0.0000000e+00	3.7498092e-05	3.5248207e-04	1.6778216e-03	4.5016896e-03	9.8921070e-06	9.2985806e-05	4.4261428e-04	1.1875589e-03	2.4751620e-06	2.3266523e-05	1.1074911e-04	2.9714608e-04	6.1842341e-07	5.8131800e-06	2.7670852e-05	7.4242449e-05
108	4.3386689e-05	0.0000000e+00	0.0000000e+00	0.0000000e+00	2.1808961e-05	2.4379936e-04	1.3081830e-03	3.9155063e-03	5.7585525e-06	6.4374062e-05	3.4541952e-04	1.0338709e-03	1.4409030e-06	1.6107655e-05	8.6430750e-05	2.5869480e-04	3.6000829e-07	4.0244829e-06	2.1594644e-05	6.4634659e-05
109	2.3827089e-05	0.0000000e+00	0.0000000e+00	0.0000000e+00	1.2077073e-05	1.6385163e-04	9.9590785e-04	3.3412032e-03	3.1918733e-06	4.3304669e-05	2.6321045e-04	8.8305319e-04	7.9868175e-07	1.0835846e-05	6.5861442e-05	2.2096067e-04	1.9954778e-07	2.7072975e-06	1.6455246e-05	5.5206234e-05
110	1.2549110e-05	0.0000000e+00	0.0000000e+00	0.0000000e+00	6.4147560e-06	1.0685151e-04	7.4099596e-04	2.7931681e-03	1.6969960e-06	2.8267105e-05	1.9602728e-04	7.3892054e-04	4.2463504e-07	7.0732065e-06	4.9051413e-05	1.8489823e-04	1.0609239e-07	1.7671961e-06	1.2255187e-05	4.6195658e-05
111	6.1441960e-06	0.0000000e+00	0.0000000e+00	0.0000000e+00	3.1672955e-06	6.7258451e-05	5.3899916e-04	2.2823158e-03	8.3870180e-07	1.7810079e-05	1.4272731e-04	6.0435865e-04	2.0986959e-07	4.4566424e-06	3.5714866e-05	1.5122956e-04	5.2434020e-08	1.1134518e-06	8.9230364e-06	3.7783338e-05
112	2.9142502e-06	0.0000000e+00	0.0000000e+00	0.0000000e+00	1.5150005e-06	4.0715640e-05	3.8272701e-04	1.8217882e-03	4.0156400e-07	1.0792032e-05	1.0144511e-04	4.8288071e-04	1.0048557e-07	2.7005498e-06	2.5385168e-05	1.2083390e-04	2.5105134e-08	6.7470047e-07	6.3421844e-06	3.0188923e-05
113	1.1014060e-06	0.0000000e+00	0.0000000e+00	0.0000000e+00	5.7745999e-07	2.3675859e-05	2.6466916e-04	1.4201666e-03	1.5321240e-07	6.2817084e-06	7.0222350e-05	3.7680036e-04	3.8339813e-08	1.5719323e-06	1.7572414e-05	9.4290381e-05	9.5786413e-09	3.9272429e-07	4.3902106e-06	2.3557072e-05
114	3.6997056e-07	0.0000000e+00	0.0000000e+00	0.0000000e+00	1.9563074e-07	1.3107259e-05	1.7782834e-04	1.0808598e-03	5.1957000e-08	3.4811190e-06	4.7228913e-05	2.8706243e-04	1.3001916e-08	8.7112840e-07	1.1818742e-05	7.1835588e-05	3.2483014e-09	2.1763619e-07	2.9527060e-06	1.7946865e-05
115	0.0000000e+00	0.0000000e+00	0.0000000e+00	0.0000000e+00	0.0000000e+00	6.9569602e-06	1.1588308e-04	8.0362829e-04	0.0000000e+00	1.8495295e-06	3.0807877e-05	2.1364708e-04	0.0000000e+00	4.6284097e-07	7.7096081e-06	5.3464744e-05	0.0000000e+00	1.1563140e-07	1.9260887e-06	1.3357078e-05
116	0.0000000e+00	0.0000000e+00	0.0000000e+00	0.0000000e+00	0.0000000e+00	3.4337049e-06	7.2915733e-05	5.8433578e-04	0.0000000e+00	9.1379760e-07	1.9404761e-05	1.5550685e-04	0.0000000e+00	2.2867988e-07	4.8560845e-06	3.8915935e-05	0.0000000e+00	5.7130344e-08	1.2131797e-06	9.7222402e-06
117	0.0000000e+00	0.0000000e+00	0.0000000e+00	0.0000000e+00	0.0000000e+00	1.6419836e-06	4.4128308e-05	4.1480610e-04	0.0000000e+00	4.3743040e-07	1.1755942e-05	1.1050585e-04	0.0000000e+00	1.0946983e-07	2.9420017e-06	2.7654816e-05	0.0000000e+00	2.7348162e-08	7.3498185e-07	6.9088294e-06
118	0.0000000e+00	0.0000000e+00	0.0000000e+00	0.0000000e+00	0.0000000e+00	6.2558157e-07	2.5648844e-05	2.8672488e-04	0.0000000e+00	1.6683210e-07	6.8401161e-06	7.6464713e-05	0.0000000e+00	4.1751559e-08	1.7118139e-06	1.9136131e-05	0.0000000e+00	1.0430405e-08	4.2764660e-07	4.7806023e-06
119	0.0000000e+00	0.0000000e+00	0.0000000e+00	0.0000000e+00	0.0000000e+00	2.1181991e-07	1.4191934e-05	1.9254430e-04	0.0000000e+00	5.6548400e-08	3.7887428e-06	5.1402496e-05	0.0000000e+00	1.4152105e-08	9.4819105e-07	1.2864264e-05	0.0000000e+00	3.5354464e-09	2.3687491e-07	3.2137208e-06
120	0.0000000e+00	0.0000000e+00	0.0000000e+00	0.0000000e+00	0.0000000e+00	0.0000000e+00	7.5305370e-06	1.2543723e-04	0.0000000e+00	0.0000000e+00	2.0125385e-06	3.3523141e-05	0.0000000e+00	0.0000000e+00	5.0367766e-07	8.3898308e-06	0.0000000e+00	0.0000000e+00	1.2582605e-07	2.0959025e-06
