# Supplementary material for: Quantifying the Potential for Future Gene Therapy to Lower Lifetime Risk of Polygenic Late-Onset Diseases
Source: MDPI journal article supplement (doi:10.3390/ijms20133352), 2019-07-08
Supplement: s2 [file s2 › SuppFiles/Results/LODsCommonLow/BreastCancer/EnvironmentArray.csv]

Age	Env	Incidence	CasesExpected
0	0	0	0
1	0	0	0
2	0	0	0
3	0	0	0
4	0	0	0
5	0	0	0
6	0	0	0
7	0	0	0
8	0	0	0
9	0	0	0
10	0	0	0
11	0	0	0
12	0	0	0
13	0	0	0
14	0	0	0
15	0	0	0
16	0	0	0
17	0	0	0
18	0	0	0
19	0	0	0
20	0	0	0
21	0	0	0
22	0	0	0
23	0	0	0
24	0	0	0
25	5.82175e-06	1.21538e-05	303
26	2.33595e-05	4.87512e-05	1218
27	4.22095e-05	8.81024e-05	2202
28	6.25351e-05	0.000130415	3259
29	8.44459e-05	0.000175911	4396
30	0.000107998	0.000224831	5618
31	0.000133442	0.000277432	6931
32	0.000160888	0.000333991	8341
33	0.000190504	0.000394806	9857
34	0.000222409	0.000460197	11485
35	0.000256898	0.000530509	13234
36	0.000294236	0.000606112	15112
37	0.000334486	0.000687404	17128
38	0.000378056	0.000774813	19293
39	0.000425383	0.000868799	21617
40	0.000476454	0.000969857	24110
41	0.000531939	0.00107852	26785
42	0.000591945	0.00119536	29655
43	0.000657087	0.00132099	32733
44	0.0007278	0.00145608	36033
45	0.000804773	0.00160133	39569
46	0.000887829	0.00175751	43359
47	0.000978652	0.00192544	47418
48	0.0010774	0.00210601	51766
49	0.00118475	0.00230017	56419
50	0.00130181	0.00250893	61398
51	0.00142916	0.00273341	66724
52	0.00147701	0.0028039	68257
53	0.00151665	0.002858	69379
54	0.00155662	0.0029121	70490
55	0.00159731	0.0029662	71591
56	0.00163831	0.0030203	72680
57	0.00168022	0.0030744	73759
58	0.00172265	0.0031285	74826
59	0.00176555	0.0031826	75882
60	0.00180905	0.0032367	76926
61	0.00185317	0.0032908	77959
62	0.00189796	0.0033449	78979
63	0.00194337	0.003399	79988
64	0.00198912	0.0034531	80985
65	0.00203545	0.0035072	81970
66	0.00208283	0.0035613	82943
67	0.00213059	0.0036154	83903
68	0.00217923	0.0036695	84850
69	0.0022283	0.0037236	85785
70	0.00227832	0.0037777	86708
71	0.00232881	0.0038318	87617
72	0.00238008	0.0038859	88514
73	0.00243206	0.00394	89397
74	0.00248468	0.0039941	90268
75	0.00253844	0.0040482	91125
76	0.00259189	0.0041023	91969
77	0.00264655	0.0041564	92800
78	0.00270234	0.0042105	93617
79	0.00275907	0.0042646	94421
80	0.00281611	0.0043187	95211
81	0.00287378	0.0043728	95987
82	0.00293218	0.0044269	96749
83	0.00299186	0.004481	97498
84	0.00305166	0.0045351	98232
85	0.00311268	0.0045892	98953
86	0.00317471	0.0046433	99660
87	0.00323718	0.0046974	100353
88	0.0033005	0.0047515	101031
89	0.00336471	0.0048056	101696
90	0.00343025	0.0048597	102347
91	0.00349636	0.0049138	102983
92	0.00356343	0.0049679	103605
93	0.00363121	0.005022	104213
94	0.0036997	0.0050761	104807
95	0.00376922	0.0051302	105386
96	0.0038397	0.0051843	105951
97	0.00391172	0.0052384	106502
98	0.0039847	0.0052925	107039
99	0.0040578	0.0053466	107560
100	0.00413162	0.0054007	108067
101	0.00420747	0.0054548	108560
102	0.00428408	0.0055089	109038
103	0.00436118	0.005563	109503
104	0.00443996	0.0056171	109952
105	0.00451977	0.0056712	110388
106	0.00460098	0.0057253	110809
107	0.00468175	0.0057794	111216
108	0.00476399	0.0058335	111609
109	0.00484856	0.0058876	111987
110	0.00493354	0.0059417	112350
111	0.00501955	0.0059958	112699
112	0.00510708	0.0060499	113035
113	0.0051957	0.006104	113355
114	0.00528437	0.0061581	113661
115	0.00537528	0.0062122	113953
116	0.00546788	0.0062663	114231
117	0.00556107	0.0063204	114495
118	0.00565484	0.0063745	114746
119	0.00575011	0.0064286	114981
