# Supplementary material for: Quantifying the Potential for Future Gene Therapy to Lower Lifetime Risk of Polygenic Late-Onset Diseases
Source: MDPI journal article supplement (doi:10.3390/ijms20133352), 2019-07-08
Supplement: s2 [file s2 › SuppFiles/Results/LODsCommonLow/BreastCancer/EnvironmentArraySD.csv]

Age	Env	EnvSD	Incidence	CasesExpected
0	0	0	0	0
1	0	0	0	0
2	0	0	0	0
3	0	0	0	0
4	0	0	0	0
5	0	0	0	0
6	0	0	0	0
7	0	0	0	0
8	0	0	0	0
9	0	0	0	0
10	0	0	0	0
11	0	0	0	0
12	0	0	0	0
13	0	0	0	0
14	0	0	0	0
15	0	0	0	0
16	0	0	0	0
17	0	0	0	0
18	0	0	0	0
19	0	0	0	0
20	0	0	0	0
21	0	0	0	0
22	0	0	0	0
23	0	0	0	0
24	0	0	0	0
25	5.82175e-06	1.471e-08	1.21538e-05	303
26	2.33595e-05	4.097e-08	4.87512e-05	1218
27	4.22095e-05	4.932e-08	8.81024e-05	2202
28	6.25351e-05	5.805e-08	0.000130415	3259
29	8.44459e-05	6.368e-08	0.000175911	4396
30	0.000107998	7.26e-08	0.000224831	5618
31	0.000133442	1.179e-07	0.000277432	6931
32	0.000160888	8.81e-08	0.000333991	8341
33	0.000190504	1.482e-07	0.000394806	9857
34	0.000222409	1.502e-07	0.000460197	11485
35	0.000256898	9.285e-08	0.000530509	13234
36	0.000294236	2.018e-07	0.000606112	15112
37	0.000334486	1.648e-07	0.000687404	17128
38	0.000378056	2.047e-07	0.000774813	19293
39	0.000425383	2.121e-07	0.000868799	21617
40	0.000476454	1.585e-07	0.000969857	24110
41	0.000531939	2.236e-07	0.00107852	26785
42	0.000591945	2.194e-07	0.00119536	29655
43	0.000657087	1.747e-07	0.00132099	32733
44	0.0007278	2.062e-07	0.00145608	36033
45	0.000804773	2.693e-07	0.00160133	39569
46	0.000887829	2.728e-07	0.00175751	43359
47	0.000978652	3.755e-07	0.00192544	47418
48	0.0010774	3.292e-07	0.00210601	51766
49	0.00118475	2.367e-07	0.00230017	56419
50	0.00130181	3.3e-07	0.00250893	61398
51	0.00142916	2.613e-07	0.00273341	66724
52	0.00147701	4.092e-07	0.0028039	68257
53	0.00151665	2.952e-07	0.002858	69379
54	0.00155662	4.262e-07	0.0029121	70490
55	0.00159731	4.425e-07	0.0029662	71591
56	0.00163831	3.765e-07	0.0030203	72680
57	0.00168022	4.856e-07	0.0030744	73759
58	0.00172265	5.101e-07	0.0031285	74826
59	0.00176555	4.075e-07	0.0031826	75882
60	0.00180905	4.563e-07	0.0032367	76926
61	0.00185317	3.791e-07	0.0032908	77959
62	0.00189796	5.411e-07	0.0033449	78979
63	0.00194337	3.22e-07	0.003399	79988
64	0.00198912	6.269e-07	0.0034531	80985
65	0.00203545	6.922e-07	0.0035072	81970
66	0.00208283	6.192e-07	0.0035613	82943
67	0.00213059	4.382e-07	0.0036154	83903
68	0.00217923	4.81e-07	0.0036695	84850
69	0.0022283	5.966e-07	0.0037236	85785
70	0.00227832	4.926e-07	0.0037777	86708
71	0.00232881	4.551e-07	0.0038318	87617
72	0.00238008	5.613e-07	0.0038859	88514
73	0.00243206	6.964e-07	0.00394	89397
74	0.00248468	5.021e-07	0.0039941	90268
75	0.00253844	5.178e-07	0.0040482	91125
76	0.00259189	5.742e-07	0.0041023	91969
77	0.00264655	5.796e-07	0.0041564	92800
78	0.00270234	7.492e-07	0.0042105	93617
79	0.00275907	5.545e-07	0.0042646	94421
80	0.00281611	3.682e-07	0.0043187	95211
81	0.00287378	3.55e-07	0.0043728	95987
82	0.00293218	6.519e-07	0.0044269	96749
83	0.00299186	5.967e-07	0.004481	97498
84	0.00305166	3.753e-07	0.0045351	98232
85	0.00311268	8.527e-07	0.0045892	98953
86	0.00317471	5.753e-07	0.0046433	99660
87	0.00323718	7.545e-07	0.0046974	100353
88	0.0033005	7.098e-07	0.0047515	101031
89	0.00336471	7.905e-07	0.0048056	101696
90	0.00343025	8.833e-07	0.0048597	102347
91	0.00349636	7.289e-07	0.0049138	102983
92	0.00356343	7.401e-07	0.0049679	103605
93	0.00363121	5.129e-07	0.005022	104213
94	0.0036997	7.388e-07	0.0050761	104807
95	0.00376922	7.234e-07	0.0051302	105386
96	0.0038397	6.599e-07	0.0051843	105951
97	0.00391172	1.059e-06	0.0052384	106502
98	0.0039847	6.63e-07	0.0052925	107039
99	0.0040578	7.504e-07	0.0053466	107560
100	0.00413162	7.615e-07	0.0054007	108067
101	0.00420747	1.216e-06	0.0054548	108560
102	0.00428408	9.489e-07	0.0055089	109038
103	0.00436118	9.876e-07	0.005563	109503
104	0.00443996	6.595e-07	0.0056171	109952
105	0.00451977	9.622e-07	0.0056712	110388
106	0.00460098	1.107e-06	0.0057253	110809
107	0.00468175	8.212e-07	0.0057794	111216
108	0.00476399	8.585e-07	0.0058335	111609
109	0.00484856	1.03e-06	0.0058876	111987
110	0.00493354	8.18e-07	0.0059417	112350
111	0.00501955	7.911e-07	0.0059958	112699
112	0.00510708	1.003e-06	0.0060499	113035
113	0.0051957	1.226e-06	0.006104	113355
114	0.00528437	1.083e-06	0.0061581	113661
115	0.00537528	1.084e-06	0.0062122	113953
116	0.00546788	1.083e-06	0.0062663	114231
117	0.00556107	7.304e-07	0.0063204	114495
118	0.00565484	9.528e-07	0.0063745	114746
119	0.00575011	1.059e-06	0.0064286	114981
