# Supplementary material for: Quantifying the Potential for Future Gene Therapy to Lower Lifetime Risk of Polygenic Late-Onset Diseases
Source: MDPI journal article supplement (doi:10.3390/ijms20133352), 2019-07-08
Supplement: s2 [file s2 › SuppFiles/Results/LODsCommonLow/BreastCancer/LifetimeRiskPostAnalysis.csv]

age	A..1..	A..2..	A..3..	A..4..	A..5..	A..6..	A..7..	A..8..	A..9..	A..10..	A..11..	A..12..	A..13..	A..14..	A..15..	A..16..	A..17..	A..18..	A..19..	A..20..
1	0.0000000e+00	0.0000000e+00	0.0000000e+00	0.0000000e+00	0.0000000e+00	0.0000000e+00	0.0000000e+00	0.0000000e+00	0.0000000e+00	0.0000000e+00	0.0000000e+00	0.0000000e+00	0.0000000e+00	0.0000000e+00	0.0000000e+00	0.0000000e+00	0.0000000e+00	0.0000000e+00	0.0000000e+00	0.0000000e+00
2	0.0000000e+00	0.0000000e+00	0.0000000e+00	0.0000000e+00	0.0000000e+00	0.0000000e+00	0.0000000e+00	0.0000000e+00	0.0000000e+00	0.0000000e+00	0.0000000e+00	0.0000000e+00	0.0000000e+00	0.0000000e+00	0.0000000e+00	0.0000000e+00	0.0000000e+00	0.0000000e+00	0.0000000e+00	0.0000000e+00
3	0.0000000e+00	0.0000000e+00	0.0000000e+00	0.0000000e+00	0.0000000e+00	0.0000000e+00	0.0000000e+00	0.0000000e+00	0.0000000e+00	0.0000000e+00	0.0000000e+00	0.0000000e+00	0.0000000e+00	0.0000000e+00	0.0000000e+00	0.0000000e+00	0.0000000e+00	0.0000000e+00	0.0000000e+00	0.0000000e+00
4	0.0000000e+00	0.0000000e+00	0.0000000e+00	0.0000000e+00	0.0000000e+00	0.0000000e+00	0.0000000e+00	0.0000000e+00	0.0000000e+00	0.0000000e+00	0.0000000e+00	0.0000000e+00	0.0000000e+00	0.0000000e+00	0.0000000e+00	0.0000000e+00	0.0000000e+00	0.0000000e+00	0.0000000e+00	0.0000000e+00
5	0.0000000e+00	0.0000000e+00	0.0000000e+00	0.0000000e+00	0.0000000e+00	0.0000000e+00	0.0000000e+00	0.0000000e+00	0.0000000e+00	0.0000000e+00	0.0000000e+00	0.0000000e+00	0.0000000e+00	0.0000000e+00	0.0000000e+00	0.0000000e+00	0.0000000e+00	0.0000000e+00	0.0000000e+00	0.0000000e+00
6	0.0000000e+00	0.0000000e+00	0.0000000e+00	0.0000000e+00	0.0000000e+00	0.0000000e+00	0.0000000e+00	0.0000000e+00	0.0000000e+00	0.0000000e+00	0.0000000e+00	0.0000000e+00	0.0000000e+00	0.0000000e+00	0.0000000e+00	0.0000000e+00	0.0000000e+00	0.0000000e+00	0.0000000e+00	0.0000000e+00
7	0.0000000e+00	0.0000000e+00	0.0000000e+00	0.0000000e+00	0.0000000e+00	0.0000000e+00	0.0000000e+00	0.0000000e+00	0.0000000e+00	0.0000000e+00	0.0000000e+00	0.0000000e+00	0.0000000e+00	0.0000000e+00	0.0000000e+00	0.0000000e+00	0.0000000e+00	0.0000000e+00	0.0000000e+00	0.0000000e+00
8	0.0000000e+00	0.0000000e+00	0.0000000e+00	0.0000000e+00	0.0000000e+00	0.0000000e+00	0.0000000e+00	0.0000000e+00	0.0000000e+00	0.0000000e+00	0.0000000e+00	0.0000000e+00	0.0000000e+00	0.0000000e+00	0.0000000e+00	0.0000000e+00	0.0000000e+00	0.0000000e+00	0.0000000e+00	0.0000000e+00
9	0.0000000e+00	0.0000000e+00	0.0000000e+00	0.0000000e+00	0.0000000e+00	0.0000000e+00	0.0000000e+00	0.0000000e+00	0.0000000e+00	0.0000000e+00	0.0000000e+00	0.0000000e+00	0.0000000e+00	0.0000000e+00	0.0000000e+00	0.0000000e+00	0.0000000e+00	0.0000000e+00	0.0000000e+00	0.0000000e+00
10	0.0000000e+00	0.0000000e+00	0.0000000e+00	0.0000000e+00	0.0000000e+00	0.0000000e+00	0.0000000e+00	0.0000000e+00	0.0000000e+00	0.0000000e+00	0.0000000e+00	0.0000000e+00	0.0000000e+00	0.0000000e+00	0.0000000e+00	0.0000000e+00	0.0000000e+00	0.0000000e+00	0.0000000e+00	0.0000000e+00
11	0.0000000e+00	0.0000000e+00	0.0000000e+00	0.0000000e+00	0.0000000e+00	0.0000000e+00	0.0000000e+00	0.0000000e+00	0.0000000e+00	0.0000000e+00	0.0000000e+00	0.0000000e+00	0.0000000e+00	0.0000000e+00	0.0000000e+00	0.0000000e+00	0.0000000e+00	0.0000000e+00	0.0000000e+00	0.0000000e+00
12	0.0000000e+00	0.0000000e+00	0.0000000e+00	0.0000000e+00	0.0000000e+00	0.0000000e+00	0.0000000e+00	0.0000000e+00	0.0000000e+00	0.0000000e+00	0.0000000e+00	0.0000000e+00	0.0000000e+00	0.0000000e+00	0.0000000e+00	0.0000000e+00	0.0000000e+00	0.0000000e+00	0.0000000e+00	0.0000000e+00
13	0.0000000e+00	0.0000000e+00	0.0000000e+00	0.0000000e+00	0.0000000e+00	0.0000000e+00	0.0000000e+00	0.0000000e+00	0.0000000e+00	0.0000000e+00	0.0000000e+00	0.0000000e+00	0.0000000e+00	0.0000000e+00	0.0000000e+00	0.0000000e+00	0.0000000e+00	0.0000000e+00	0.0000000e+00	0.0000000e+00
14	0.0000000e+00	0.0000000e+00	0.0000000e+00	0.0000000e+00	0.0000000e+00	0.0000000e+00	0.0000000e+00	0.0000000e+00	0.0000000e+00	0.0000000e+00	0.0000000e+00	0.0000000e+00	0.0000000e+00	0.0000000e+00	0.0000000e+00	0.0000000e+00	0.0000000e+00	0.0000000e+00	0.0000000e+00	0.0000000e+00
15	0.0000000e+00	0.0000000e+00	0.0000000e+00	0.0000000e+00	0.0000000e+00	0.0000000e+00	0.0000000e+00	0.0000000e+00	0.0000000e+00	0.0000000e+00	0.0000000e+00	0.0000000e+00	0.0000000e+00	0.0000000e+00	0.0000000e+00	0.0000000e+00	0.0000000e+00	0.0000000e+00	0.0000000e+00	0.0000000e+00
16	0.0000000e+00	0.0000000e+00	0.0000000e+00	0.0000000e+00	0.0000000e+00	0.0000000e+00	0.0000000e+00	0.0000000e+00	0.0000000e+00	0.0000000e+00	0.0000000e+00	0.0000000e+00	0.0000000e+00	0.0000000e+00	0.0000000e+00	0.0000000e+00	0.0000000e+00	0.0000000e+00	0.0000000e+00	0.0000000e+00
17	0.0000000e+00	0.0000000e+00	0.0000000e+00	0.0000000e+00	0.0000000e+00	0.0000000e+00	0.0000000e+00	0.0000000e+00	0.0000000e+00	0.0000000e+00	0.0000000e+00	0.0000000e+00	0.0000000e+00	0.0000000e+00	0.0000000e+00	0.0000000e+00	0.0000000e+00	0.0000000e+00	0.0000000e+00	0.0000000e+00
18	0.0000000e+00	0.0000000e+00	0.0000000e+00	0.0000000e+00	0.0000000e+00	0.0000000e+00	0.0000000e+00	0.0000000e+00	0.0000000e+00	0.0000000e+00	0.0000000e+00	0.0000000e+00	0.0000000e+00	0.0000000e+00	0.0000000e+00	0.0000000e+00	0.0000000e+00	0.0000000e+00	0.0000000e+00	0.0000000e+00
19	0.0000000e+00	0.0000000e+00	0.0000000e+00	0.0000000e+00	0.0000000e+00	0.0000000e+00	0.0000000e+00	0.0000000e+00	0.0000000e+00	0.0000000e+00	0.0000000e+00	0.0000000e+00	0.0000000e+00	0.0000000e+00	0.0000000e+00	0.0000000e+00	0.0000000e+00	0.0000000e+00	0.0000000e+00	0.0000000e+00
20	0.0000000e+00	0.0000000e+00	0.0000000e+00	0.0000000e+00	0.0000000e+00	0.0000000e+00	0.0000000e+00	0.0000000e+00	0.0000000e+00	0.0000000e+00	0.0000000e+00	0.0000000e+00	0.0000000e+00	0.0000000e+00	0.0000000e+00	0.0000000e+00	0.0000000e+00	0.0000000e+00	0.0000000e+00	0.0000000e+00
21	0.0000000e+00	0.0000000e+00	0.0000000e+00	0.0000000e+00	0.0000000e+00	0.0000000e+00	0.0000000e+00	0.0000000e+00	0.0000000e+00	0.0000000e+00	0.0000000e+00	0.0000000e+00	0.0000000e+00	0.0000000e+00	0.0000000e+00	0.0000000e+00	0.0000000e+00	0.0000000e+00	0.0000000e+00	0.0000000e+00
22	0.0000000e+00	0.0000000e+00	0.0000000e+00	0.0000000e+00	0.0000000e+00	0.0000000e+00	0.0000000e+00	0.0000000e+00	0.0000000e+00	0.0000000e+00	0.0000000e+00	0.0000000e+00	0.0000000e+00	0.0000000e+00	0.0000000e+00	0.0000000e+00	0.0000000e+00	0.0000000e+00	0.0000000e+00	0.0000000e+00
23	0.0000000e+00	0.0000000e+00	0.0000000e+00	0.0000000e+00	0.0000000e+00	0.0000000e+00	0.0000000e+00	0.0000000e+00	0.0000000e+00	0.0000000e+00	0.0000000e+00	0.0000000e+00	0.0000000e+00	0.0000000e+00	0.0000000e+00	0.0000000e+00	0.0000000e+00	0.0000000e+00	0.0000000e+00	0.0000000e+00
24	0.0000000e+00	0.0000000e+00	0.0000000e+00	0.0000000e+00	0.0000000e+00	0.0000000e+00	0.0000000e+00	0.0000000e+00	0.0000000e+00	0.0000000e+00	0.0000000e+00	0.0000000e+00	0.0000000e+00	0.0000000e+00	0.0000000e+00	0.0000000e+00	0.0000000e+00	0.0000000e+00	0.0000000e+00	0.0000000e+00
25	0.0000000e+00	0.0000000e+00	0.0000000e+00	0.0000000e+00	0.0000000e+00	0.0000000e+00	0.0000000e+00	0.0000000e+00	0.0000000e+00	0.0000000e+00	0.0000000e+00	0.0000000e+00	0.0000000e+00	0.0000000e+00	0.0000000e+00	0.0000000e+00	0.0000000e+00	0.0000000e+00	0.0000000e+00	0.0000000e+00
26	9.2021810e-05	9.2223659e-05	9.2347373e-05	9.2398533e-05	2.3035987e-05	2.3086516e-05	2.3117486e-05	2.3130293e-05	5.7593991e-06	5.7720323e-06	5.7797752e-06	5.7829771e-06	1.4398513e-06	1.4430096e-06	1.4449454e-06	1.4457459e-06	3.5996256e-07	3.6075214e-07	3.6123607e-07	3.6143619e-07
27	4.5951630e-04	4.6058042e-04	4.6126535e-04	4.6155810e-04	1.1539879e-04	1.1566603e-04	1.1583805e-04	1.1591158e-04	2.8856572e-05	2.8923399e-05	2.8966415e-05	2.8984801e-05	7.2141698e-06	7.2308767e-06	7.2416307e-06	7.2462271e-06	1.8035378e-06	1.8077145e-06	1.8104030e-06	1.8115521e-06
28	1.1202195e-03	1.1229351e-03	1.1247432e-03	1.1255708e-03	2.8216341e-04	2.8284747e-04	2.8330300e-04	2.8351152e-04	7.0568844e-05	7.0739929e-05	7.0853856e-05	7.0906010e-05	1.7642320e-05	1.7685092e-05	1.7713574e-05	1.7726612e-05	4.4105613e-06	4.4212541e-06	4.4283746e-06	4.4316342e-06
29	2.0938121e-03	2.0990906e-03	2.1027224e-03	2.1045062e-03	5.2902932e-04	5.3036326e-04	5.3128120e-04	5.3173218e-04	1.3233164e-04	1.3266531e-04	1.3289493e-04	1.3300774e-04	3.3083199e-05	3.3166619e-05	3.3224024e-05	3.3252227e-05	8.2707499e-06	8.2916047e-06	8.3059559e-06	8.3130066e-06
30	3.4009574e-03	3.4098512e-03	3.4161581e-03	3.4194516e-03	8.6210110e-04	8.6435626e-04	8.6595583e-04	8.6679150e-04	2.1568396e-04	2.1624817e-04	2.1664837e-04	2.1685745e-04	5.3921611e-05	5.4062666e-05	5.4162716e-05	5.4214987e-05	1.3480296e-05	1.3515559e-05	1.3540572e-05	1.3553640e-05
31	5.0623791e-03	5.0761237e-03	5.0860855e-03	5.0916192e-03	1.2876708e-03	1.2911685e-03	1.2937043e-03	1.2951137e-03	3.2221427e-04	3.2308952e-04	3.2372407e-04	3.2407679e-04	8.0554727e-05	8.0773542e-05	8.0932183e-05	8.1020364e-05	2.0138482e-05	2.0193186e-05	2.0232845e-05	2.0254890e-05
32	7.1017144e-03	7.1217068e-03	7.1364683e-03	7.1451259e-03	1.8129914e-03	1.8180985e-03	1.8218706e-03	1.8240848e-03	4.5375472e-04	4.5503296e-04	4.5597710e-04	4.5653132e-04	1.1344066e-04	1.1376023e-04	1.1399627e-04	1.1413482e-04	2.8359825e-05	2.8439715e-05	2.8498725e-05	2.8533363e-05
33	9.5431659e-03	9.5710152e-03	9.5918986e-03	9.6047201e-03	2.4457008e-03	2.4528440e-03	2.4582026e-03	2.4614959e-03	6.1223744e-04	6.1402570e-04	6.1536723e-04	6.1619174e-04	1.5306254e-04	1.5350961e-04	1.5384500e-04	1.5405113e-04	3.8265089e-05	3.8376855e-05	3.8460702e-05	3.8512234e-05
34	1.2412229e-02	1.2449814e-02	1.2478276e-02	1.2496490e-02	3.1940500e-03	3.2037325e-03	3.2110679e-03	3.2157677e-03	7.9975244e-04	8.0217698e-04	8.0401382e-04	8.0519076e-04	1.9994296e-04	2.0054911e-04	2.0100833e-04	2.0130258e-04	4.9984906e-05	5.0136441e-05	5.0251245e-05	5.0324804e-05
35	1.5734743e-02	1.5784287e-02	1.5821971e-02	1.5847009e-02	4.0666869e-03	4.0795104e-03	4.0892680e-03	4.0957600e-03	1.0184939e-03	1.0217058e-03	1.0241498e-03	1.0257760e-03	2.5463061e-04	2.5543360e-04	2.5604462e-04	2.5645119e-04	6.3656427e-05	6.3857170e-05	6.4009923e-05	6.4111562e-05
36	1.9539268e-02	1.9603330e-02	1.9652165e-02	1.9685604e-02	5.0733571e-03	5.0900222e-03	5.1027302e-03	5.1114453e-03	1.2709373e-03	1.2751125e-03	1.2782964e-03	1.2804801e-03	3.1774450e-04	3.1878834e-04	3.1958434e-04	3.2013028e-04	7.9434376e-05	7.9695331e-05	7.9894326e-05	8.0030807e-05
37	2.3856274e-02	2.3937926e-02	2.4000040e-02	2.4043681e-02	6.2247565e-03	6.2461128e-03	6.2623626e-03	6.2737986e-03	1.5598035e-03	1.5651557e-03	1.5692282e-03	1.5720945e-03	3.8996503e-04	3.9130313e-04	3.9232129e-04	3.9303789e-04	9.7488824e-05	9.7823340e-05	9.8077873e-05	9.8257019e-05
38	2.8715037e-02	2.8817941e-02	2.8895760e-02	2.8951638e-02	7.5317125e-03	7.5587857e-03	7.5792599e-03	7.5939873e-03	1.8878540e-03	1.8946411e-03	1.8997739e-03	1.9034664e-03	4.7198280e-04	4.7367965e-04	4.7496291e-04	4.7588607e-04	1.1799238e-04	1.1841658e-04	1.1873739e-04	1.1896817e-04
39	3.4148173e-02	3.4276643e-02	3.4372985e-02	3.4443281e-02	9.0065475e-03	9.0405606e-03	9.0660628e-03	9.0847043e-03	2.2582354e-03	2.2667654e-03	2.2731609e-03	2.2778363e-03	5.6458473e-04	5.6671732e-04	5.6831628e-04	5.6948519e-04	1.4114174e-04	1.4167487e-04	1.4207459e-04	1.4236681e-04
40	4.0191412e-02	4.0350452e-02	4.0468655e-02	4.0555811e-02	1.0663142e-02	1.0705535e-02	1.0737030e-02	1.0760293e-02	2.6744982e-03	2.6851338e-03	2.6930352e-03	2.6988719e-03	6.6865872e-04	6.7131777e-04	6.7329322e-04	6.7475249e-04	1.6715881e-04	1.6782355e-04	1.6831739e-04	1.6868219e-04
41	4.6877466e-02	4.7072831e-02	4.7216688e-02	4.7323546e-02	1.2515203e-02	1.2567658e-02	1.2606259e-02	1.2634980e-02	3.1401606e-03	3.1533261e-03	3.1630142e-03	3.1702231e-03	7.8508471e-04	7.8837630e-04	7.9079847e-04	7.9260081e-04	1.9626352e-04	1.9708638e-04	1.9769190e-04	1.9814246e-04
42	5.4244101e-02	5.4482563e-02	5.4656610e-02	5.4786261e-02	1.4578805e-02	1.4643333e-02	1.4690391e-02	1.4725497e-02	3.6593543e-03	3.6755572e-03	3.6873731e-03	3.6961884e-03	9.1489609e-04	9.1894710e-04	9.2190126e-04	9.2410526e-04	2.2871414e-04	2.2972684e-04	2.3046535e-04	2.3101632e-04
43	6.2326674e-02	6.2615971e-02	6.2825595e-02	6.2981535e-02	1.6870238e-02	1.6949177e-02	1.7006322e-02	1.7048880e-02	4.2362816e-03	4.2561132e-03	4.2704685e-03	4.2811603e-03	1.0591439e-03	1.0641022e-03	1.0676913e-03	1.0703645e-03	2.6477335e-04	2.6601285e-04	2.6691008e-04	2.6757833e-04
44	7.1163747e-02	7.1512889e-02	7.1764378e-02	7.1950649e-02	1.9407900e-02	1.9504025e-02	1.9573191e-02	1.9624460e-02	4.8756996e-03	4.8998614e-03	4.9172458e-03	4.9301323e-03	1.2190181e-03	1.2250591e-03	1.2294055e-03	1.2326274e-03	3.0473851e-04	3.0624866e-04	3.0733521e-04	3.0814064e-04
45	8.0794058e-02	8.1213585e-02	8.1514144e-02	8.1735508e-02	2.2211528e-02	2.2328144e-02	2.2411596e-02	2.2473081e-02	5.5827282e-03	5.6120573e-03	5.6330444e-03	5.6485073e-03	1.3957994e-03	1.4031324e-03	1.4083796e-03	1.4122457e-03	3.4892968e-04	3.5076280e-04	3.5207453e-04	3.5304099e-04
46	9.1258581e-02	9.1761098e-02	9.2118963e-02	9.2380797e-02	2.5303097e-02	2.5444231e-02	2.5544612e-02	2.5618054e-02	6.3630844e-03	6.3986022e-03	6.4238626e-03	6.4423434e-03	1.5909179e-03	1.5997983e-03	1.6061140e-03	1.6107347e-03	3.9770424e-04	3.9992418e-04	4.0150300e-04	4.0265809e-04
47	1.0259055e-01	1.0319061e-01	1.0361534e-01	1.0392402e-01	2.8703513e-02	2.8873917e-02	2.8994364e-02	2.9081860e-02	7.2222454e-03	7.2651588e-03	7.2954887e-03	7.3175209e-03	1.8057439e-03	1.8164735e-03	1.8240568e-03	1.8295655e-03	4.5140460e-04	4.5408678e-04	4.5598247e-04	4.5735953e-04
48	1.1483439e-01	1.1554908e-01	1.1605154e-01	1.1641461e-01	3.2439544e-02	3.2644926e-02	3.2789090e-02	3.2893185e-02	8.1672219e-03	8.2189824e-03	8.2553115e-03	8.2815420e-03	2.0420314e-03	2.0549732e-03	2.0640565e-03	2.0706150e-03	5.1046902e-04	5.1370418e-04	5.1597483e-04	5.1761430e-04
49	1.2802806e-01	1.2887752e-01	1.2947024e-01	1.2989646e-01	3.6537866e-02	3.6785113e-02	3.6957315e-02	3.7081024e-02	9.2050490e-03	9.2674111e-03	9.3108402e-03	9.3420376e-03	2.3015406e-03	2.3171333e-03	2.3279921e-03	2.3357925e-03	5.7533731e-04	5.7923511e-04	5.8194954e-04	5.8389946e-04
50	1.4220764e-01	1.4321562e-01	1.4391313e-01	1.4441241e-01	4.1026898e-02	4.1324328e-02	4.1529705e-02	4.1676543e-02	1.0343262e-02	1.0418348e-02	1.0470189e-02	1.0507251e-02	2.5861571e-03	2.6049315e-03	2.6178937e-03	2.6271606e-03	6.4648056e-04	6.5117368e-04	6.5441388e-04	6.5673036e-04
51	1.5741061e-01	1.5860459e-01	1.5942415e-01	1.6000769e-01	4.5938395e-02	4.6295915e-02	4.6540720e-02	4.6714784e-02	1.1590318e-02	1.1680661e-02	1.1742513e-02	1.1786488e-02	2.8979972e-03	2.9205869e-03	2.9360524e-03	2.9470478e-03	7.2442750e-04	7.3007427e-04	7.3394020e-04	7.3668875e-04
52	1.7366887e-01	1.7508130e-01	1.7604269e-01	1.7672346e-01	5.1305062e-02	5.1734691e-02	5.2026312e-02	5.2232467e-02	1.2954994e-02	1.3063674e-02	1.3137431e-02	1.3189566e-02	3.2392577e-03	3.2664326e-03	3.2848752e-03	3.2979113e-03	8.0972691e-04	8.1651978e-04	8.2112983e-04	8.2438846e-04
53	1.9027092e-01	1.9192831e-01	1.9304742e-01	1.9383514e-01	5.6828952e-02	5.7340084e-02	5.7684184e-02	5.7925925e-02	1.4360443e-02	1.4489860e-02	1.4576969e-02	1.4638158e-02	3.5907172e-03	3.6230779e-03	3.6448594e-03	3.6601597e-03	8.9757507e-04	9.0566413e-04	9.1110876e-04	9.1493331e-04
54	2.0713540e-01	2.0906553e-01	2.1035970e-01	2.1126466e-01	6.2476933e-02	6.3079404e-02	6.3482132e-02	6.3763137e-02	1.5798136e-02	1.5950803e-02	1.6052836e-02	1.6124020e-02	3.9502428e-03	3.9884177e-03	4.0139312e-03	4.0317308e-03	9.8743888e-04	9.9698121e-04	1.0033587e-03	1.0078079e-03
55	2.2425292e-01	2.2648531e-01	2.2797422e-01	2.2900791e-01	6.8247255e-02	6.8951618e-02	6.9419992e-02	6.9744395e-02	1.7267663e-02	1.7446279e-02	1.7565030e-02	1.7647266e-02	4.3177318e-03	4.3623958e-03	4.3920901e-03	4.4126535e-03	1.0792927e-03	1.0904570e-03	1.0978794e-03	1.1030195e-03
56	2.4161667e-01	2.4418290e-01	2.4588833e-01	2.4706409e-01	7.4139371e-02	7.4957017e-02	7.5498865e-02	7.5871476e-02	1.8768927e-02	1.8976407e-02	1.9113878e-02	1.9208397e-02	4.6931602e-03	4.7450422e-03	4.7794180e-03	4.8030532e-03	1.1731305e-03	1.1860989e-03	1.1946915e-03	1.2005993e-03
57	2.5921604e-01	2.6214897e-01	2.6409580e-01	2.6542829e-01	8.0151019e-02	8.1093924e-02	8.1718230e-02	8.2144377e-02	2.0301386e-02	2.0540796e-02	2.0699287e-02	2.0807453e-02	5.0763926e-03	5.1362597e-03	5.1758920e-03	5.2029400e-03	1.2689183e-03	1.2838826e-03	1.2937890e-03	1.3005499e-03
58	2.7704390e-01	2.8037877e-01	2.8259457e-01	2.8410025e-01	8.6281658e-02	8.7362781e-02	8.8079582e-02	8.8565286e-02	2.1864948e-02	2.2139609e-02	2.2321690e-02	2.2445046e-02	5.4674064e-03	5.5360890e-03	5.5816208e-03	5.6124673e-03	1.3666506e-03	1.3838183e-03	1.3951992e-03	1.4029095e-03
59	2.9508985e-01	2.9886386e-01	3.0137861e-01	3.0307617e-01	9.2529209e-02	9.3762366e-02	9.4582660e-02	9.5134794e-02	2.3459123e-02	2.3772578e-02	2.3981067e-02	2.4121374e-02	5.8660788e-03	5.9444632e-03	5.9965991e-03	6.0316847e-03	1.4662966e-03	1.4858891e-03	1.4989208e-03	1.5076906e-03
60	3.1334332e-01	3.1759511e-01	3.2044061e-01	3.2235128e-01	9.8891428e-02	1.0029111e-01	1.0122669e-01	1.0185310e-01	2.5083376e-02	2.5439346e-02	2.5677267e-02	2.5836535e-02	6.2722766e-03	6.3612930e-03	6.4207893e-03	6.4606170e-03	1.5678229e-03	1.5900729e-03	1.6049442e-03	1.6148993e-03
61	3.3179392e-01	3.3656379e-01	3.3977399e-01	3.4192118e-01	1.0536620e-01	1.0694770e-01	1.0801125e-01	1.0872067e-01	2.6737210e-02	2.7139617e-02	2.7410228e-02	2.7590698e-02	6.6858752e-03	6.7865052e-03	6.8541766e-03	6.8993066e-03	1.6711985e-03	1.6963511e-03	1.7132658e-03	1.7245461e-03
62	3.5043059e-01	3.5576073e-01	3.5937092e-01	3.6178143e-01	1.1195115e-01	1.1373060e-01	1.1493549e-01	1.1573794e-01	2.8420055e-02	2.8873054e-02	2.9179783e-02	2.9384029e-02	7.1067327e-03	7.2200150e-03	7.2967191e-03	7.3477952e-03	1.7763877e-03	1.8047027e-03	1.8238750e-03	1.8366415e-03
63	3.6924069e-01	3.7517588e-01	3.7922379e-01	3.8192722e-01	1.1864331e-01	1.2063802e-01	1.2199864e-01	1.2290531e-01	3.0131199e-02	3.0639239e-02	3.0985787e-02	3.1216681e-02	7.5346710e-03	7.6617183e-03	7.7483808e-03	7.8061211e-03	1.8833461e-03	1.9151015e-03	1.9367627e-03	1.9511949e-03
64	3.8821012e-01	3.9479861e-01	3.9932403e-01	4.0235252e-01	1.2543906e-01	1.2766782e-01	1.2919951e-01	1.3022262e-01	3.1869757e-02	3.2437672e-02	3.2827985e-02	3.3088671e-02	7.9694690e-03	8.1114906e-03	8.2090982e-03	8.2742892e-03	1.9920183e-03	2.0275164e-03	2.0519132e-03	2.0682076e-03
65	4.0732111e-01	4.1461661e-01	4.1966076e-01	4.2304836e-01	1.3233309e-01	1.3481690e-01	1.3653571e-01	1.3768837e-01	3.3634405e-02	3.4267603e-02	3.4705814e-02	3.4999658e-02	8.4107955e-03	8.5691440e-03	8.6787306e-03	8.7522143e-03	2.1023217e-03	2.1419004e-03	2.1692912e-03	2.1876583e-03
66	4.2655589e-01	4.3461847e-01	4.4022426e-01	4.4400722e-01	1.3932021e-01	1.4208266e-01	1.4400549e-01	1.4530177e-01	3.5423850e-02	3.6128411e-02	3.6618872e-02	3.6949497e-02	8.8583277e-03	9.0345237e-03	9.1571778e-03	9.2398602e-03	2.2141754e-03	2.2582148e-03	2.2888716e-03	2.3095377e-03
67	4.4589700e-01	4.5479500e-01	4.6100736e-01	4.6522335e-01	1.4639570e-01	1.4946377e-01	1.5160850e-01	1.5306319e-01	3.7236933e-02	3.8019808e-02	3.8567130e-02	3.8938350e-02	9.3117755e-03	9.5075577e-03	9.6444326e-03	9.7372676e-03	2.3275069e-03	2.3764415e-03	2.4106526e-03	2.4338562e-03
68	4.6532065e-01	4.7513058e-01	4.8199706e-01	4.8668628e-01	1.5355169e-01	1.5695572e-01	1.5934144e-01	1.6097047e-01	3.9071669e-02	3.9940684e-02	4.0549794e-02	4.0965713e-02	9.7706428e-03	9.9879686e-03	1.0140297e-02	1.0244311e-02	2.4421922e-03	2.4965113e-03	2.5345846e-03	2.5605822e-03
69	4.8480378e-01	4.9561165e-01	5.0318349e-01	5.0838827e-01	1.6078091e-01	1.6455523e-01	1.6720267e-01	1.6902301e-01	4.0926237e-02	4.1890245e-02	4.2566497e-02	4.3031492e-02	1.0234474e-02	1.0475558e-02	1.0644678e-02	1.0760967e-02	2.5581175e-03	2.6183744e-03	2.6606446e-03	2.6897099e-03
70	5.0431814e-01	5.1621990e-01	5.2455414e-01	5.3031830e-01	1.6807353e-01	1.7225665e-01	1.7518900e-01	1.7721838e-01	4.2798143e-02	4.3867082e-02	4.4616466e-02	4.5135119e-02	1.0702646e-02	1.0969974e-02	1.1157385e-02	1.1287093e-02	2.6751269e-03	2.7419428e-03	2.7887844e-03	2.8212037e-03
71	5.2383573e-01	5.3693846e-01	5.4609895e-01	5.5246807e-01	1.7542011e-01	1.8005528e-01	1.8329864e-01	1.8555573e-01	4.4685002e-02	4.5870044e-02	4.6699306e-02	4.7276443e-02	1.1174563e-02	1.1470928e-02	1.1678317e-02	1.1822653e-02	2.7930713e-03	2.8671447e-03	2.9189793e-03	2.9550544e-03
72	5.4332173e-01	5.5774479e-01	5.6780399e-01	5.7482563e-01	1.8280790e-01	1.8794366e-01	1.9152775e-01	1.9403223e-01	4.6583564e-02	4.7897250e-02	4.8814075e-02	4.9454789e-02	1.1649411e-02	1.1977951e-02	1.2207241e-02	1.2367478e-02	2.9117477e-03	2.9938623e-03	3.0511704e-03	3.0912196e-03
73	5.6273950e-01	5.7861605e-01	5.8965514e-01	5.9737964e-01	1.9022350e-01	1.9591434e-01	1.9987265e-01	2.0264555e-01	4.8490413e-02	4.9946832e-02	5.0959884e-02	5.1669620e-02	1.2126336e-02	1.2490575e-02	1.2743932e-02	1.2921433e-02	3.0309424e-03	3.1219791e-03	3.1853021e-03	3.2296658e-03
74	5.8205010e-01	5.9952646e-01	6.1163660e-01	6.2011814e-01	1.9765222e-01	2.0395850e-01	2.0832884e-01	2.1139297e-01	5.0401793e-02	5.2016564e-02	5.3135629e-02	5.3920297e-02	1.2604399e-02	1.3008244e-02	1.3288117e-02	1.3484358e-02	3.1504206e-03	3.2513557e-03	3.3213056e-03	3.3703532e-03
75	6.0121300e-01	6.2044734e-01	6.3373021e-01	6.4302910e-01	2.0507835e-01	2.1206589e-01	2.1689069e-01	2.2027157e-01	5.2313680e-02	5.4103844e-02	5.5339913e-02	5.6206128e-02	1.3082593e-02	1.3530308e-02	1.3839445e-02	1.4056083e-02	3.2699310e-03	3.3818297e-03	3.4590934e-03	3.5132384e-03
76	6.2018809e-01	6.4134967e-01	6.5591871e-01	6.6610248e-01	2.1248649e-01	2.2022645e-01	2.2555339e-01	2.2927974e-01	5.4222130e-02	5.6206129e-02	5.7571557e-02	5.8526770e-02	1.3559933e-02	1.4056129e-02	1.4397621e-02	1.4636519e-02	3.3892268e-03	3.5132421e-03	3.5985919e-03	3.6583001e-03
77	6.3892322e-01	6.6219276e-01	6.7817410e-01	6.8931916e-01	2.1985466e-01	2.2842365e-01	2.3430602e-01	2.3841042e-01	5.6121467e-02	5.8319167e-02	5.9827771e-02	6.0880439e-02	1.4034998e-02	1.4584646e-02	1.4961949e-02	1.5225223e-02	3.5079534e-03	3.6453271e-03	3.7396267e-03	3.8054268e-03
78	6.5736782e-01	6.8294005e-01	7.0047439e-01	7.1266643e-01	2.2716259e-01	2.3664393e-01	2.4314161e-01	2.4766084e-01	5.8006472e-02	6.0439504e-02	6.2106821e-02	6.3266489e-02	1.4506483e-02	1.5114993e-02	1.5531995e-02	1.5822031e-02	3.6257845e-03	3.7778687e-03	3.8820894e-03	3.9545780e-03
79	6.7546680e-01	7.0355240e-01	7.2279440e-01	7.3612970e-01	2.3438762e-01	2.4487228e-01	2.5205166e-01	2.5702727e-01	5.9871303e-02	6.2563300e-02	6.4406567e-02	6.5684030e-02	1.4972927e-02	1.5646211e-02	1.6107222e-02	1.6426723e-02	3.7423549e-03	3.9106269e-03	4.0258463e-03	4.1056983e-03
80	6.9316042e-01	7.2398846e-01	7.4510524e-01	7.5969118e-01	2.4150447e-01	2.5309222e-01	2.6102568e-01	2.6650433e-01	6.1709423e-02	6.4686322e-02	6.6724351e-02	6.8131738e-02	1.5432695e-02	1.6177241e-02	1.6686968e-02	1.7038967e-02	3.8572560e-03	4.0433372e-03	4.1707312e-03	4.2587048e-03
81	7.1038348e-01	7.4420208e-01	7.6737189e-01	7.8332796e-01	2.4848448e-01	2.6128421e-01	2.7004971e-01	2.7608364e-01	6.3513395e-02	6.6803529e-02	6.9056597e-02	7.0607493e-02	1.5883927e-02	1.6706823e-02	1.7270338e-02	1.7658233e-02	3.9700228e-03	4.1756846e-03	4.3165207e-03	4.4134650e-03
82	7.2706559e-01	7.6414311e-01	7.8955655e-01	8.0701582e-01	2.5529654e-01	2.6942703e-01	2.7910870e-01	2.8575645e-01	6.5275137e-02	6.8909435e-02	7.1399446e-02	7.3109090e-02	1.6324599e-02	1.7233583e-02	1.7856366e-02	1.8283969e-02	4.0801503e-03	4.3073259e-03	4.4629734e-03	4.5698411e-03
83	7.4313324e-01	7.8375611e-01	8.1161812e-01	8.3072876e-01	2.6190762e-01	2.7749686e-01	2.8818601e-01	2.9551322e-01	6.6986064e-02	7.0997881e-02	7.3748621e-02	7.5634108e-02	1.6752567e-02	1.7755982e-02	1.8443983e-02	1.8915571e-02	4.1871016e-03	4.4378761e-03	4.6098220e-03	4.7276819e-03
84	7.5851719e-01	8.0298374e-01	8.3351585e-01	8.5444064e-01	2.6828620e-01	2.8546913e-01	2.9726537e-01	3.0534477e-01	6.8637960e-02	7.3062503e-02	7.6099953e-02	7.8180240e-02	1.7165772e-02	1.8272427e-02	1.9032146e-02	1.9552461e-02	4.2903632e-03	4.5669377e-03	4.7568061e-03	4.8868431e-03
85	7.7314854e-01	8.2176045e-01	8.5520288e-01	8.7811721e-01	2.7439918e-01	2.9331404e-01	3.0632620e-01	3.1523684e-01	7.0222168e-02	7.5095550e-02	7.8448114e-02	8.0743818e-02	1.7562051e-02	1.8780980e-02	1.9619522e-02	2.0193722e-02	4.3893939e-03	4.6940258e-03	4.9035924e-03	5.0470953e-03
86	7.8696500e-01	8.4002172e-01	8.7663498e-01	9.0172610e-01	2.8021638e-01	3.0100266e-01	3.1534985e-01	3.2517699e-01	7.1730791e-02	7.7089501e-02	8.0788289e-02	8.3321677e-02	1.7939427e-02	1.9279759e-02	2.0204908e-02	2.0838563e-02	4.4837000e-03	4.8186705e-03	5.0498800e-03	5.2082409e-03
87	7.9990622e-01	8.5769528e-01	8.9776115e-01	9.2522925e-01	2.8570757e-01	3.0850186e-01	3.2431406e-01	3.3514979e-01	7.3155886e-02	7.9035726e-02	8.3114717e-02	8.5909860e-02	1.8295913e-02	1.9766605e-02	2.0786861e-02	2.1485994e-02	4.5727850e-03	4.9403321e-03	5.1953088e-03	5.3700324e-03
88	8.1191284e-01	8.7470351e-01	9.1852226e-01	9.4858226e-01	2.9084183e-01	3.1577491e-01	3.3319191e-01	3.4513599e-01	7.4489313e-02	8.0924620e-02	8.5420398e-02	8.8503391e-02	1.8629472e-02	2.0239115e-02	2.1363631e-02	2.2134771e-02	4.6561400e-03	5.0584104e-03	5.3394412e-03	5.5321589e-03
89	8.2293164e-01	8.9097300e-01	9.3885669e-01	9.7174049e-01	2.9559051e-01	3.2278643e-01	3.4195527e-01	3.5511629e-01	7.5723502e-02	8.2746925e-02	8.7698007e-02	9.1097287e-02	1.8938211e-02	2.0694973e-02	2.1933386e-02	2.2783647e-02	4.7332918e-03	5.1723265e-03	5.4818193e-03	5.6943087e-03
90	8.3291849e-01	9.0643473e-01	9.5869904e-01	9.9465833e-01	2.9992825e-01	3.2950216e-01	3.5057370e-01	3.6507055e-01	7.6851723e-02	8.4493647e-02	8.9939611e-02	9.3686330e-02	1.9220444e-02	2.1131930e-02	2.2494141e-02	2.3431316e-02	4.8038195e-03	5.2815182e-03	5.6219472e-03	5.8561558e-03
91	8.4184377e-01	9.2102433e-01	9.7798216e-01	1.0000000e+00	3.0383569e-01	3.3588940e-01	3.5901573e-01	3.7497843e-01	7.7868792e-02	8.6156186e-02	9.2136995e-02	9.6265261e-02	1.9474875e-02	2.1547832e-02	2.3043840e-02	2.4076464e-02	4.8673991e-03	5.3854478e-03	5.7593113e-03	6.0173714e-03
92	8.4969485e-01	9.3467847e-01	9.9662935e-01	1.0000000e+00	3.0730011e-01	3.4191453e-01	3.6724413e-01	3.8481429e-01	7.8771238e-02	8.7725667e-02	9.4280403e-02	9.8827394e-02	1.9700634e-02	2.1940459e-02	2.3580044e-02	2.4717417e-02	4.9238135e-03	5.4835604e-03	5.8933017e-03	6.1775375e-03
93	8.5648142e-01	9.4733733e-01	1.0000000e+00	1.0000000e+00	3.1031869e-01	3.4754501e-01	3.7522012e-01	3.9455018e-01	7.9558150e-02	8.9193480e-02	9.6359665e-02	1.0136545e-01	1.9897494e-02	2.2307658e-02	2.4100207e-02	2.5352355e-02	4.9730058e-03	5.5753179e-03	6.0232827e-03	6.3361989e-03
94	8.6223582e-01	9.5894608e-01	1.0000000e+00	1.0000000e+00	3.1289859e-01	3.5274964e-01	3.8290486e-01	4.0415496e-01	8.0231231e-02	9.0551335e-02	9.8364565e-02	1.0387127e-01	2.0065879e-02	2.2647353e-02	2.4601773e-02	2.5979238e-02	5.0150823e-03	5.6602019e-03	6.1486156e-03	6.4928464e-03
95	8.6701425e-01	9.6945959e-01	1.0000000e+00	1.0000000e+00	3.1505806e-01	3.5750089e-01	3.9026078e-01	4.1359497e-01	8.0795065e-02	9.1791881e-02	1.0028519e-01	1.0633605e-01	2.0206935e-02	2.2957705e-02	2.5082263e-02	2.6595860e-02	5.0503296e-03	5.7377528e-03	6.2686807e-03	6.6469283e-03
96	8.7089309e-01	9.7884794e-01	1.0000000e+00	1.0000000e+00	3.1682505e-01	3.6177774e-01	3.9725188e-01	4.2283513e-01	8.1256795e-02	9.2909455e-02	1.0211202e-01	1.0875057e-01	2.0322449e-02	2.3237296e-02	2.5539293e-02	2.7199918e-02	5.0791940e-03	5.8076166e-03	6.3828827e-03	6.7978695e-03
97	8.7396880e-01	9.8710025e-01	1.0000000e+00	1.0000000e+00	3.1823749e-01	3.6556739e-01	4.0384262e-01	4.3183596e-01	8.1626174e-02	9.3900520e-02	1.0383562e-01	1.1110446e-01	2.0414860e-02	2.3485241e-02	2.5970504e-02	2.7788814e-02	5.1022854e-03	5.8695721e-03	6.4906321e-03	6.9450207e-03
98	8.7635052e-01	9.9422895e-01	1.0000000e+00	1.0000000e+00	3.1934016e-01	3.6886777e-01	4.0999875e-01	4.4055656e-01	8.1914780e-02	9.4764345e-02	1.0544690e-01	1.1338695e-01	2.0487065e-02	2.3701355e-02	2.6373619e-02	2.8359855e-02	5.1203275e-03	5.9235736e-03	6.5913600e-03	7.0877089e-03
99	8.7815107e-01	1.0000000e+00	1.0000000e+00	1.0000000e+00	3.2018059e-01	3.7168736e-01	4.1568692e-01	4.4895526e-01	8.2134935e-02	9.5502949e-02	1.0693694e-01	1.1558702e-01	2.0542145e-02	2.3886144e-02	2.6746407e-02	2.8910284e-02	5.1340903e-03	5.9697471e-03	6.6845092e-03	7.2252455e-03
100	8.7948090e-01	1.0000000e+00	1.0000000e+00	1.0000000e+00	3.2080634e-01	3.7404614e-01	4.2087669e-01	4.5699011e-01	8.2298992e-02	9.6121358e-02	1.0829756e-01	1.1769355e-01	2.0583190e-02	2.4040864e-02	2.7086821e-02	2.9437317e-02	5.1443463e-03	6.0084068e-03	6.7695682e-03	7.3569347e-03
101	8.8044116e-01	1.0000000e+00	1.0000000e+00	1.0000000e+00	3.2126187e-01	3.7597500e-01	4.2554532e-01	4.6462164e-01	8.2418520e-02	9.6627481e-02	1.0952258e-01	1.1969602e-01	2.0613095e-02	2.4167493e-02	2.7393315e-02	2.9938323e-02	5.1518186e-03	6.0400472e-03	6.8461508e-03	7.4821195e-03
102	8.8111811e-01	1.0000000e+00	1.0000000e+00	1.0000000e+00	3.2158565e-01	3.7751622e-01	4.2968050e-01	4.7181330e-01	8.2503553e-02	9.7032240e-02	1.1060857e-01	1.2158471e-01	2.0634370e-02	2.4268763e-02	2.7665027e-02	3.0410869e-02	5.1571345e-03	6.0653508e-03	6.9140419e-03	7.6001918e-03
103	8.8158281e-01	1.0000000e+00	1.0000000e+00	1.0000000e+00	3.2180976e-01	3.7871872e-01	4.3327968e-01	4.7852678e-01	8.2562459e-02	9.7348319e-02	1.1155463e-01	1.2334937e-01	2.0649109e-02	2.4347846e-02	2.7901730e-02	3.0852387e-02	5.1608171e-03	6.0851108e-03	6.9731851e-03	7.7105105e-03
104	8.8189272e-01	1.0000000e+00	1.0000000e+00	1.0000000e+00	3.2196044e-01	3.7963460e-01	4.3635243e-01	4.8472565e-01	8.2602102e-02	9.7589274e-02	1.1236301e-01	1.2498019e-01	2.0659028e-02	2.4408134e-02	2.8103993e-02	3.1260426e-02	5.1632954e-03	6.1001743e-03	7.0237223e-03	7.8124628e-03
105	8.8209323e-01	1.0000000e+00	1.0000000e+00	1.0000000e+00	3.2205875e-01	3.8031631e-01	4.3892212e-01	4.9037947e-01	8.2627987e-02	9.7768782e-02	1.1303966e-01	1.2646895e-01	2.0665504e-02	2.4453049e-02	2.8273296e-02	3.1632927e-02	5.1649136e-03	6.1113965e-03	7.0660239e-03	7.9055347e-03
106	8.8221845e-01	1.0000000e+00	1.0000000e+00	1.0000000e+00	3.2212065e-01	3.8081243e-01	4.4102287e-01	4.9546414e-01	8.2644303e-02	9.7899539e-02	1.1359334e-01	1.2780906e-01	2.0669587e-02	2.4485766e-02	2.8411832e-02	3.1968239e-02	5.1659337e-03	6.1195709e-03	7.1006376e-03	7.9893139e-03
107	8.8229367e-01	1.0000000e+00	1.0000000e+00	1.0000000e+00	3.2215815e-01	3.8116492e-01	4.4270069e-01	4.9996583e-01	8.2654195e-02	9.7992525e-02	1.1403595e-01	1.2899662e-01	2.0672062e-02	2.4509032e-02	2.8522581e-02	3.2265385e-02	5.1665521e-03	6.1253841e-03	7.1283084e-03	8.0635563e-03
108	8.8233705e-01	1.0000000e+00	1.0000000e+00	1.0000000e+00	3.2217996e-01	3.8140871e-01	4.4400887e-01	5.0388133e-01	8.2659954e-02	9.8056899e-02	1.1438137e-01	1.3003049e-01	2.0673503e-02	2.4525140e-02	2.8609012e-02	3.2524080e-02	5.1669121e-03	6.1294086e-03	7.1499031e-03	8.1281910e-03
109	8.8236088e-01	1.0000000e+00	1.0000000e+00	1.0000000e+00	3.2219204e-01	3.8157257e-01	4.4500478e-01	5.0722254e-01	8.2663146e-02	9.8100203e-02	1.1464458e-01	1.3091355e-01	2.0674302e-02	2.4535976e-02	2.8674873e-02	3.2745040e-02	5.1671116e-03	6.1321159e-03	7.1663583e-03	8.1833972e-03
110	8.8237343e-01	1.0000000e+00	1.0000000e+00	1.0000000e+00	3.2219845e-01	3.8167942e-01	4.4574577e-01	5.1001571e-01	8.2664843e-02	9.8128470e-02	1.1484061e-01	1.3165247e-01	2.0674726e-02	2.4543049e-02	2.8723924e-02	3.2929939e-02	5.1672177e-03	6.1338831e-03	7.1786135e-03	8.2295929e-03
111	8.8237957e-01	1.0000000e+00	1.0000000e+00	1.0000000e+00	3.2220162e-01	3.8174668e-01	4.4628477e-01	5.1229802e-01	8.2665682e-02	9.8146280e-02	1.1498333e-01	1.3225683e-01	2.0674936e-02	2.4547505e-02	2.8759639e-02	3.3081168e-02	5.1672702e-03	6.1349965e-03	7.1875366e-03	8.2673762e-03
112	8.8238249e-01	1.0000000e+00	1.0000000e+00	1.0000000e+00	3.2220314e-01	3.8178739e-01	4.4666750e-01	5.1411981e-01	8.2666083e-02	9.8157072e-02	1.1508478e-01	1.3273971e-01	2.0675037e-02	2.4550206e-02	2.8785024e-02	3.3202002e-02	5.1672953e-03	6.1356712e-03	7.1938787e-03	8.2975651e-03
113	8.8238359e-01	1.0000000e+00	1.0000000e+00	1.0000000e+00	3.2220371e-01	3.8181107e-01	4.4693217e-01	5.1553998e-01	8.2666236e-02	9.8163354e-02	1.1515500e-01	1.3311651e-01	2.0675075e-02	2.4551778e-02	2.8802597e-02	3.3296292e-02	5.1673049e-03	6.1360640e-03	7.1982690e-03	8.3211222e-03
114	8.8238396e-01	1.0000000e+00	1.0000000e+00	1.0000000e+00	3.2220391e-01	3.8182418e-01	4.4711000e-01	5.1662084e-01	8.2666288e-02	9.8166835e-02	1.1520223e-01	1.3340357e-01	2.0675088e-02	2.4552649e-02	2.8814416e-02	3.3368128e-02	5.1673081e-03	6.1362816e-03	7.2012217e-03	8.3390691e-03
115	8.8238396e-01	1.0000000e+00	1.0000000e+00	1.0000000e+00	3.2220391e-01	3.8183113e-01	4.4722588e-01	5.1742446e-01	8.2666288e-02	9.8168685e-02	1.1523304e-01	1.3361722e-01	2.0675088e-02	2.4553112e-02	2.8822125e-02	3.3421593e-02	5.1673081e-03	6.1363972e-03	7.2031478e-03	8.3524261e-03
116	8.8238396e-01	1.0000000e+00	1.0000000e+00	1.0000000e+00	3.2220391e-01	3.8183457e-01	4.4729880e-01	5.1800880e-01	8.2666288e-02	9.8169599e-02	1.1525244e-01	1.3377272e-01	2.0675088e-02	2.4553341e-02	2.8826981e-02	3.3460509e-02	5.1673081e-03	6.1364544e-03	7.2043609e-03	8.3621484e-03
117	8.8238396e-01	1.0000000e+00	1.0000000e+00	1.0000000e+00	3.2220391e-01	3.8183621e-01	4.4734292e-01	5.1842361e-01	8.2666288e-02	9.8170036e-02	1.1526420e-01	1.3388323e-01	2.0675088e-02	2.4553450e-02	2.8829923e-02	3.3488163e-02	5.1673081e-03	6.1364817e-03	7.2050959e-03	8.3690572e-03
118	8.8238396e-01	1.0000000e+00	1.0000000e+00	1.0000000e+00	3.2220391e-01	3.8183683e-01	4.4736857e-01	5.1871033e-01	8.2666288e-02	9.8170203e-02	1.1527104e-01	1.3395969e-01	2.0675088e-02	2.4553492e-02	2.8831635e-02	3.3507300e-02	5.1673081e-03	6.1364921e-03	7.2055236e-03	8.3738378e-03
119	8.8238396e-01	1.0000000e+00	1.0000000e+00	1.0000000e+00	3.2220391e-01	3.8183705e-01	4.4738277e-01	5.1890288e-01	8.2666288e-02	9.8170259e-02	1.1527483e-01	1.3401110e-01	2.0675088e-02	2.4553506e-02	2.8832583e-02	3.3520164e-02	5.1673081e-03	6.1364957e-03	7.2057604e-03	8.3770515e-03
120	8.8238396e-01	1.0000000e+00	1.0000000e+00	1.0000000e+00	3.2220391e-01	3.8183705e-01	4.4739030e-01	5.1902831e-01	8.2666288e-02	9.8170259e-02	1.1527684e-01	1.3404462e-01	2.0675088e-02	2.4553506e-02	2.8833087e-02	3.3528554e-02	5.1673081e-03	6.1364957e-03	7.2058863e-03	8.3791474e-03
