# Supplementary material for: Quantifying the Potential for Future Gene Therapy to Lower Lifetime Risk of Polygenic Late-Onset Diseases
Source: MDPI journal article supplement (doi:10.3390/ijms20133352), 2019-07-08
Supplement: s2 [file s2 › SuppFiles/Results/LODsCommonLow/CAD/-1.000/FrailtyAnalysis.csv]

Age	Heritability	MeanOR	CaseOR	nControls	nCases	nCumIncidence	nIncidence	nLifeIncidence0	nAbsIncidence0	nLifeIncidence5	nAbsIncidence5	nLifeIncidence10	nAbsIncidence10	nLifeIncidence15	nAbsIncidence15	nIncActDivExp
36	0.305548	0.43823	0.84287	999996889	3111	3.111e-06	3.111e-06	3.03352e-06	3.03352e-06	3.05128e-06	3.05128e-06	3.0664e-06	3.0664e-06	3.07908e-06	3.07908e-06	0.0790677
37	0.305549	0.438228	0.837175	999990438	6451	9.562e-06	6.45102e-06	9.31557e-06	6.28205e-06	9.37159e-06	6.3203e-06	9.41899e-06	6.35259e-06	9.45944e-06	6.38036e-06	0.0777965
38	0.30555	0.438225	0.829626	999979771	10667	2.0229e-05	1.06671e-05	1.96887e-05	1.03732e-05	1.98108e-05	1.04392e-05	1.99131e-05	1.04941e-05	2.00015e-05	1.0542e-05	0.0814571
39	0.305552	0.438221	0.827003	999964804	14967	3.5196e-05	1.49673e-05	3.42222e-05	1.45334e-05	3.44412e-05	1.46304e-05	3.46232e-05	1.471e-05	3.47806e-05	1.47791e-05	0.0813947
40	0.305555	0.438216	0.83194	999944414	20390	5.5586e-05	2.03907e-05	5.39909e-05	1.97687e-05	5.43485e-05	1.99073e-05	5.46428e-05	2.00196e-05	5.48966e-05	2.01161e-05	0.0841885
41	0.305558	0.438208	0.827562	999918122	26292	8.1878e-05	2.62935e-05	7.94403e-05	2.54495e-05	7.99856e-05	2.56372e-05	8.04301e-05	2.57873e-05	8.08117e-05	2.59151e-05	0.0858037
42	0.305562	0.438199	0.830368	999885410	32712	0.00011459	3.27147e-05	0.000111049	3.16091e-05	0.000111841	3.18553e-05	0.000112479	3.20493e-05	0.000113025	3.2213e-05	0.0867378
43	0.305567	0.438188	0.834829	999844918	40492	0.000155082	4.04966e-05	0.000150104	3.90545e-05	0.000151218	3.93766e-05	0.000152107	3.96273e-05	0.000152861	3.98358e-05	0.0889987
44	0.305572	0.438174	0.829112	999795950	48968	0.00020405	4.89756e-05	0.00019724	4.71361e-05	0.000198767	4.75494e-05	0.000199973	4.78667e-05	0.000200988	4.81272e-05	0.0905785
45	0.30558	0.438158	0.828698	999737383	58567	0.000262617	5.8579e-05	0.000253495	5.62548e-05	0.000255549	5.67825e-05	0.000257154	5.71804e-05	0.000258491	5.75031e-05	0.0922601
46	0.305588	0.438138	0.827752	999667414	69969	0.000332586	6.99874e-05	0.000320544	6.70492e-05	0.000323276	6.77268e-05	0.00032538	6.82264e-05	0.000327117	6.86259e-05	0.0947644
47	0.305598	0.438115	0.828917	999585596	81818	0.000414404	8.18452e-05	0.000398748	7.82037e-05	0.000402336	7.90595e-05	0.000405055	7.96752e-05	0.000407277	8.01604e-05	0.0960174
48	0.305609	0.438088	0.828222	999488883	96713	0.000511117	9.67531e-05	0.000490931	9.2183e-05	0.000495615	9.32797e-05	0.000499104	9.4049e-05	0.000501925	9.46477e-05	0.0989843
49	0.305623	0.438057	0.829487	999375521	113362	0.000624479	0.00011342	0.000598652	0.000107721	0.000604737	0.000109121	0.000609182	0.000110078	0.000612737	0.000110812	0.101746
50	0.305639	0.43802	0.828404	999243807	131714	0.000756193	0.000131796	0.00072339	0.000124738	0.000731251	0.000126514	0.000736883	0.000127701	0.000741333	0.000128596	0.104159
51	0.305657	0.437977	0.827532	999091314	152493	0.000908686	0.000152608	0.000867273	0.000143882	0.00087738	0.000146129	0.000884489	0.000147606	0.000890028	0.000148695	0.106686
52	0.305678	0.437928	0.829266	998914106	177208	0.00108589	0.000177369	0.00103379	0.00016652	0.00104676	0.00016938	0.00105572	0.000171233	0.0010626	0.000172567	0.110078
53	0.305703	0.43787	0.828688	998708677	205429	0.00129132	0.000205652	0.00122597	0.000192177	0.00124257	0.000195807	0.00125386	0.000198136	0.00126237	0.00019977	0.113666
54	0.305731	0.437804	0.828837	998472030	236647	0.00152797	0.000236953	0.00144627	0.000220302	0.00146744	0.000224871	0.00148165	0.000227794	0.00149216	0.000229791	0.116971
55	0.305764	0.437727	0.829757	998199221	272809	0.00180078	0.000273226	0.00169889	0.000252617	0.0017258	0.000258361	0.00174369	0.000262039	0.00175665	0.000264497	0.120777
56	0.305802	0.43764	0.828183	997885965	313256	0.00211403	0.000313821	0.00198729	0.000288398	0.00202137	0.000295568	0.00204388	0.000300184	0.00205987	0.000303218	0.124517
57	0.305845	0.437539	0.829237	997525557	360408	0.00247444	0.000361172	0.00231702	0.000329734	0.00236004	0.00033867	0.00238836	0.000344487	0.00240813	0.000348257	0.128916
58	0.305895	0.437423	0.828112	997111570	413987	0.00288843	0.000415014	0.00269321	0.000376186	0.00274732	0.000387281	0.00278296	0.000394596	0.00280742	0.00039929	0.133539
59	0.305951	0.43729	0.828815	996637854	473716	0.00336215	0.000475088	0.00312052	0.000427313	0.00318831	0.000440996	0.0032331	0.000450144	0.00326341	0.000455994	0.138081
60	0.306017	0.437137	0.828198	996093386	544468	0.00390661	0.000546305	0.00360781	0.000487293	0.00369248	0.000504169	0.00374874	0.000515633	0.00378639	0.000522972	0.143692
61	0.306092	0.436962	0.828399	995469765	623621	0.00453023	0.000626067	0.00416128	0.000553467	0.00426662	0.000574134	0.00433714	0.000588408	0.00438398	0.000597597	0.149299
62	0.306177	0.436763	0.827719	994757815	711950	0.00524218	0.00071519	0.00478748	0.000626206	0.00491797	0.000651356	0.00500615	0.000669009	0.00506448	0.0006805	0.154911
63	0.306275	0.436534	0.828165	993942794	815021	0.00605721	0.000819316	0.00549746	0.000709973	0.00565857	0.000740601	0.0057686	0.000762444	0.00584133	0.000776845	0.161478
64	0.306388	0.436271	0.827912	993008741	934053	0.00699126	0.000939745	0.00630274	0.000805284	0.00650113	0.000842558	0.00663813	0.000869538	0.0067289	0.000887575	0.16883
65	0.306516	0.435972	0.827097	991945260	1063481	0.00805474	0.00107097	0.0072095	0.000906761	0.00745294	0.000951805	0.0076229	0.000984767	0.00773606	0.00100716	0.175701
66	0.306662	0.435629	0.827828	990731689	1213571	0.00926831	0.00122343	0.00823202	0.00102252	0.00852999	0.00107705	0.00874017	0.00111727	0.00888111	0.00114505	0.183619
67	0.306829	0.43524	0.826997	989349447	1382242	0.0106506	0.00139517	0.00938186	0.00114984	0.00974576	0.00121577	0.0100048	0.0012646	0.01018	0.00129887	0.191918
68	0.307019	0.434795	0.826692	987775070	1574377	0.0122249	0.00159133	0.0106736	0.00129171	0.0111172	0.00137146	0.0114354	0.00143062	0.0116528	0.00147281	0.201008
69	0.307236	0.434287	0.826913	985982128	1792942	0.0140179	0.00181513	0.0121227	0.00144916	0.012663	0.00154577	0.0130527	0.00161731	0.0133219	0.0016691	0.210945
70	0.307482	0.433708	0.826498	983944711	2037417	0.0160553	0.00206638	0.0137429	0.00162017	0.0144002	0.00173717	0.0148762	0.00182347	0.0152085	0.00188662	0.221383
71	0.307763	0.43305	0.826225	981632325	2312386	0.0183677	0.00235012	0.0155494	0.00180649	0.0163485	0.00194835	0.0169284	0.00205225	0.0173374	0.00212889	0.232585
72	0.308081	0.432302	0.82552	979008399	2623926	0.0209916	0.00267302	0.0175598	0.00201039	0.0185313	0.00218275	0.0192363	0.00230791	0.019738	0.0024006	0.24489
73	0.308442	0.431453	0.824833	976036551	2971848	0.0239634	0.00303557	0.0197886	0.00222881	0.0209695	0.00243827	0.0218251	0.00258881	0.0224385	0.00270049	0.258004
74	0.308852	0.430489	0.824337	972677447	3359104	0.0273226	0.00344158	0.0222495	0.0024609	0.0236846	0.00271503	0.0247212	0.00289602	0.0254686	0.00303006	0.271977
75	0.309314	0.429397	0.824098	968886207	3791240	0.0311138	0.00389774	0.0249567	0.00270719	0.0266994	0.00301483	0.0279537	0.00323254	0.0288617	0.00339312	0.287061
76	0.309837	0.42816	0.823637	964615788	4270419	0.0353842	0.00440755	0.0279218	0.00296512	0.0300355	0.00333616	0.0315518	0.00359813	0.0326517	0.00379002	0.303227
77	0.310428	0.426761	0.822953	959806734	4809054	0.0401933	0.00498546	0.0311597	0.00323786	0.0337201	0.00368458	0.0355523	0.00400048	0.0368816	0.00422988	0.321167
78	0.311092	0.425185	0.821983	954419013	5387721	0.045581	0.00561334	0.0346659	0.00350619	0.0377608	0.00404066	0.0399727	0.00442038	0.0415749	0.0046933	0.339444
79	0.311837	0.42341	0.820935	948389983	6029030	0.05161	0.00631696	0.0384446	0.00377875	0.0421777	0.0044169	0.0448457	0.00487302	0.0467727	0.00519787	0.359469
80	0.312673	0.421412	0.820186	941652481	6737502	0.0583475	0.00710415	0.0424954	0.00405079	0.0469887	0.00481101	0.0502035	0.00535773	0.0525174	0.00574463	0.38139
81	0.313607	0.419171	0.819013	934156652	7495829	0.0658433	0.00796029	0.0467993	0.00430392	0.0521933	0.00520465	0.0560594	0.00585593	0.0588331	0.00631576	0.404203
82	0.31465	0.416658	0.817953	925828312	8328340	0.0741717	0.00891536	0.0513424	0.00454307	0.0578007	0.00560735	0.0624403	0.00638097	0.0657612	0.00692805	0.429277
83	0.315811	0.413846	0.816441	916603927	9224385	0.0833961	0.00996339	0.0560946	0.00475217	0.0638037	0.006003	0.0693584	0.00691806	0.0733294	0.00756819	0.456087
84	0.3171	0.410709	0.81517	906430254	10173673	0.0935697	0.0110993	0.0610122	0.00491765	0.0701801	0.00637645	0.0768117	0.00745328	0.0815523	0.00822297	0.484272
85	0.318526	0.407216	0.81343	895239212	11191042	0.104761	0.0123463	0.0660516	0.00503938	0.0769085	0.00672839	0.0848028	0.00799113	0.0904516	0.00889923	0.514736
86	0.320098	0.403336	0.811465	882979925	12259287	0.11702	0.0136939	0.0711538	0.00510219	0.0839475	0.00703898	0.0933149	0.00851211	0.100029	0.00957726	0.546911
87	0.321826	0.399039	0.809168	869599996	13379929	0.1304	0.0151532	0.0762547	0.0051009	0.0912462	0.00729868	0.102323	0.00900851	0.11028	0.0102514	0.581172
88	0.323718	0.39429	0.806929	855063234	14536762	0.144937	0.0167166	0.0812796	0.00502492	0.0987352	0.00748898	0.111784	0.00946016	0.121182	0.0109022	0.617175
89	0.325778	0.389061	0.804158	839341967	15721267	0.160658	0.0183861	0.08615	0.00487037	0.106334	0.00759919	0.121637	0.00985346	0.1327	0.0115175	0.654978
90	0.328016	0.383315	0.801344	822404728	16937239	0.177595	0.0201792	0.0907909	0.00464089	0.113961	0.00762692	0.13182	0.0101832	0.144794	0.0120943	0.695196
91	0.330433	0.377023	0.797829	804245584	18159144	0.195754	0.0220805	0.095127	0.00433613	0.121519	0.00755765	0.142247	0.0104265	0.157403	0.0126086	0.737284
92	0.333029	0.370159	0.793944	784882647	19362937	0.215117	0.0240759	0.0990905	0.0039635	0.128901	0.00738183	0.152809	0.0105624	0.17044	0.0130368	0.780814
93	0.335804	0.36269	0.789868	764326089	20556558	0.235674	0.0261906	0.102633	0.00354231	0.136007	0.00710579	0.163399	0.0105902	0.183817	0.0133777	0.826667
94	0.338749	0.354595	0.785371	742630942	21695147	0.257369	0.0283847	0.105718	0.00308527	0.142728	0.00672105	0.173886	0.0104868	0.197415	0.0135977	0.873633
95	0.341853	0.345858	0.780171	719854585	22776357	0.280145	0.0306698	0.108334	0.00261621	0.148968	0.00624084	0.184142	0.0102563	0.211109	0.0136938	0.922177
96	0.345098	0.336463	0.774423	696073182	23781403	0.303927	0.0330364	0.11049	0.00215555	0.154647	0.00567864	0.19404	0.00989758	0.224763	0.0136547	0.9721
97	0.348457	0.326419	0.768071	671421406	24651776	0.328579	0.0354155	0.112211	0.00172168	0.159693	0.0050461	0.203438	0.00939812	0.238211	0.0134474	1.02151
98	0.351897	0.315737	0.760699	646014346	25407060	0.353986	0.0378407	0.113546	0.00133489	0.164071	0.00437814	0.212221	0.00878246	0.2513	0.0130891	1.07154
99	0.355375	0.304426	0.752759	619982600	26031746	0.380017	0.0402959	0.114551	0.0010047	0.167773	0.00370197	0.220285	0.0080645	0.263883	0.012583	1.12187
100	0.358841	0.292526	0.74395	593498014	26484586	0.406502	0.0427183	0.115285	0.00073402	0.170815	0.00304215	0.227542	0.00725691	0.275809	0.0119261	1.1709
101	0.362226	0.280096	0.733904	566743732	26754282	0.433256	0.045079	0.115806	0.000520906	0.17324	0.00242501	0.233931	0.00638852	0.286944	0.0111349	1.21802
102	0.365461	0.267188	0.722777	539875809	26867923	0.460124	0.0474075	0.116165	0.00035909	0.175117	0.00187646	0.23943	0.00549973	0.297187	0.010243	1.2642
103	0.368457	0.253896	0.710383	513098786	26777023	0.486901	0.0495985	0.116404	0.000239387	0.176524	0.00140686	0.244045	0.00461422	0.306443	0.00925601	1.30678
104	0.371118	0.240323	0.696695	486613611	26485175	0.513386	0.0516181	0.116558	0.000154011	0.177546	0.0010222	0.247811	0.00376646	0.314648	0.00820497	1.34506
105	0.373339	0.226589	0.681507	460609082	26004529	0.539391	0.0534398	0.116654	9.54366e-05	0.178267	0.000720716	0.250798	0.00298701	0.321773	0.00712537	1.37854
106	0.375015	0.212823	0.664387	435250190	25358892	0.56475	0.0550551	0.116711	5.68039e-05	0.17876	0.000493738	0.253097	0.00229853	0.327829	0.00605532	1.40717
107	0.376035	0.199156	0.646072	410702351	24547839	0.589298	0.0563994	0.116743	3.22804e-05	0.179088	0.000328082	0.254811	0.00171442	0.332853	0.00502482	1.42943
108	0.37629	0.185737	0.625554	387109509	23592842	0.61289	0.0574451	0.116761	1.75767e-05	0.179299	0.00021092	0.25605	0.00123957	0.336919	0.00406552	1.44478
109	0.375692	0.172709	0.603025	364594074	22515435	0.635406	0.058163	0.11677	9.00617e-06	0.17943	0.000130927	0.256919	0.000868983	0.340121	0.00320192	1.45262
110	0.374172	0.160202	0.57869	343253329	21340745	0.656747	0.0585329	0.116774	4.37485e-06	0.179509	7.83205e-05	0.257511	0.000591459	0.342572	0.0024513	1.45255
111	0.371691	0.148338	0.552288	323163582	20089747	0.676836	0.0585275	0.116776	2.00897e-06	0.179554	4.5001e-05	0.257902	0.000391147	0.344393	0.00182093	1.44399
112	0.36824	0.137198	0.524194	304341319	18822263	0.695659	0.0582438	0.116777	8.47002e-07	0.179578	2.47513e-05	0.258154	0.00025156	0.345708	0.00131455	1.4294
113	0.363873	0.126866	0.494157	286818206	17523113	0.713182	0.0575772	0.116777	3.50462e-07	0.179591	1.30547e-05	0.25831	0.000156657	0.346628	0.000920664	1.40625
114	0.358679	0.117374	0.462985	270563712	16254494	0.729436	0.0566718	0.116777	8.12725e-08	0.179598	6.5018e-06	0.258405	9.45199e-05	0.347256	0.000627342	1.37809
115	0.352812	0.108746	0.430814	255558631	15005081	0.744441	0.0554586	0.116777	0	0.179601	3.07604e-06	0.25846	5.50686e-05	0.347672	0.000415866	1.34322
116	0.346436	0.100955	0.398284	241717314	13841317	0.758283	0.054161	0.116777	0	0.179602	1.38413e-06	0.258491	3.10046e-05	0.347941	0.00026949	1.30706
117	0.339767	0.0939723	0.366225	228979931	12737383	0.77102	0.0526954	0.116777	0	0.179603	5.73182e-07	0.258508	1.67497e-05	0.348111	0.000170235	1.26751
118	0.333016	0.0877393	0.33484	217245992	11733939	0.782754	0.0512444	0.116777	0	0.179603	2.34679e-07	0.258516	8.74178e-06	0.348216	0.000104901	1.22894
119	0.326373	0.0821881	0.305343	206427042	10818950	0.793573	0.0498005	0.116777	0	0.179603	5.40948e-08	0.258521	4.32758e-06	0.348279	6.29122e-05	1.19108
120	0.320033	0.0772522	0.277573	196431002	9996040	0.803569	0.0484241	0.116777	0	0.179603	0	0.258523	2.04919e-06	0.348316	3.66855e-05	1.15531
