# Supplementary material for: Quantifying the Potential for Future Gene Therapy to Lower Lifetime Risk of Polygenic Late-Onset Diseases
Source: MDPI journal article supplement (doi:10.3390/ijms20133352), 2019-07-08
Supplement: s2 [file s2 › SuppFiles/Results/LODsCommonLow/CAD/-1.000/IndividualsByBetaDistrib.csv]

nEntry	Beta	nDetrimentalCount	nFractionPopulation	nCumulativeFractionPopulation	nEditsNeeded	nIndividuals
0	-19.8	0	0	1	0	0
1	-19.6	0	0	1	0	0
2	-19.4	0	0	1	0	0
3	-19.2	0	0	1	0	0
4	-19	0	0	1	0	0
5	-18.8	0	0	1	0	0
6	-18.6	0	0	1	0	0
7	-18.4	0	0	1	0	0
8	-18.2	0	0	1	0	0
9	-18	0	0	1	0	0
10	-17.8	0	0	1	0	0
11	-17.6	0	0	1	0	0
12	-17.4	0	0	1	0	0
13	-17.2	0	0	1	0	0
14	-17	0	0	1	0	0
15	-16.8	0	0	1	0	0
16	-16.6	0	0	1	0	0
17	-16.4	0	0	1	0	0
18	-16.2	0	0	1	0	0
19	-16	0	0	1	0	0
20	-15.8	0	0	1	0	0
21	-15.6	0	0	1	0	0
22	-15.4	0	0	1	0	0
23	-15.2	0	0	1	0	0
24	-15	0	0	1	0	0
25	-14.8	0	0	1	0	0
26	-14.6	0	0	1	0	0
27	-14.4	0	0	1	0	0
28	-14.2	0	0	1	0	0
29	-14	0	0	1	0	0
30	-13.8	0	0	1	0	0
31	-13.6	0	0	1	0	0
32	-13.4	0	0	1	0	0
33	-13.2	0	0	1	0	0
34	-13	0	0	1	0	0
35	-12.8	0	0	1	0	0
36	-12.6	0	0	1	0	0
37	-12.4	0	0	1	0	0
38	-12.2	561	2e-09	1	0	2
39	-12	0	0	1	0	0
40	-11.8	557.5	4e-09	1	0	4
41	-11.6	571	2e-09	0.99999999	0	2
42	-11.4	566.75	4e-09	0.99999999	0	4
43	-11.2	570.86	1.4e-08	0.99999999	0	14
44	-11	572.68	2.2e-08	0.99999997	0	22
45	-10.8	571.96	2.8e-08	0.99999995	0	28
46	-10.6	574.98	5.2e-08	0.99999992	0	52
47	-10.4	575.83	1.02e-07	0.99999987	0	102
48	-10.2	576.98	1.92e-07	0.99999977	0	192
49	-10	580.19	3.15e-07	0.99999958	0	315
50	-9.8	581.41	5.15e-07	0.99999926	0	515
51	-9.6	582.84	7.85e-07	0.99999875	0	785
52	-9.4	584.99	1.238e-06	0.99999796	0	1238
53	-9.2	586.82	1.889e-06	0.99999673	0	1889
54	-9	588.58	2.937e-06	0.99999484	0	2937
55	-8.8	590.55	4.743e-06	0.9999919	0	4743
56	-8.6	592.44	6.916e-06	0.99998716	0	6916
57	-8.4	594.22	1.0228e-05	0.99998024	0	10228
58	-8.2	596.29	1.5649e-05	0.99997001	0	15649
59	-8	598.21	2.2741e-05	0.99995436	0	22741
60	-7.8	600.16	3.3548e-05	0.99993162	0	33548
61	-7.6	601.92	4.7748e-05	0.99989807	0	47748
62	-7.4	603.89	6.8489e-05	0.99985033	0	68489
63	-7.2	605.78	9.6805e-05	0.99978184	0	96805
64	-7	607.67	0.000135966	0.99968503	0	135966
65	-6.8	609.57	0.000188842	0.99954907	0	188842
66	-6.6	611.48	0.000260148	0.99936022	0	260148
67	-6.4	613.36	0.000352645	0.99910008	0	352645
68	-6.2	615.29	0.00047248	0.99874743	0	472480
69	-6	617.18	0.000631037	0.99827495	0	631037
70	-5.8	619.07	0.000836173	0.99764391	0	836173
71	-5.6	620.96	0.001086467	0.99680774	0	1086467
72	-5.4	622.87	0.001410543	0.99572127	0	1410543
73	-5.2	624.76	0.001802702	0.99431073	0	1802702
74	-5	626.66	0.002292949	0.99250803	0	2292949
75	-4.8	628.55	0.002880205	0.99021508	0	2880205
76	-4.6	630.46	0.00358159	0.98733487	0	3581590
77	-4.4	632.35	0.004408695	0.98375329	0	4408695
78	-4.2	634.24	0.005381929	0.97934459	0	5381929
79	-4	636.14	0.006503966	0.97396266	0	6503966
80	-3.8	638.03	0.007791799	0.9674587	0	7791799
81	-3.6	639.93	0.009225203	0.9596669	0	9225203
82	-3.4	641.82	0.010829241	0.95044169	0	10829241
83	-3.2	643.72	0.012589822	0.93961245	0	12589822
84	-3	645.61	0.01450634	0.92702263	0	14506340
85	-2.8	647.51	0.016538201	0.91251629	0	16538201
86	-2.6	649.4	0.018685153	0.89597809	0	18685153
87	-2.4	651.3	0.02090715	0.87729294	0	20907150
88	-2.2	653.19	0.023179562	0.85638579	0	23179562
89	-2	655.08	0.025449763	0.83320622	0	25449763
90	-1.8	656.98	0.027674062	0.80775646	0	27674062
91	-1.6	658.87	0.029805782	0.7800824	0	29805782
92	-1.4	660.76	0.031810906	0.75027662	0	31810906
93	-1.2	662.65	0.033621667	0.71846571	0	33621667
94	-1	664.54	0.035208628	0.68484404	0	35208628
95	-0.8	666.43	0.036526368	0.64963542	0	36526368
96	-0.6	668.33	0.0375326	0.61310905	0	37532600
97	-0.4	670.22	0.038221263	0.57557645	0	38221263
98	-0.2	672.11	0.038523676	0.53735519	0	38523676
99	0	674	0.038495888	0.49883151	0	38495888
100	0.2	675.89	0.038102395	0.46033562	1.8903	38102395
101	0.4	677.78	0.037378216	0.42223323	3.7802	37378216
102	0.6	679.67	0.036304113	0.38485501	5.6704	36304113
103	0.8	681.56	0.034966169	0.3485509	7.5588	34966169
104	1	683.45	0.033345227	0.31358473	9.4489	33345227
105	1.2	685.34	0.031501784	0.2802395	11.34	31501784
106	1.4	687.22	0.02950228	0.24873772	13.224	29502280
107	1.6	689.11	0.027359779	0.21923544	15.115	27359779
108	1.8	691	0.02514682	0.19187566	17.004	25146820
109	2	692.89	0.02290146	0.16672884	18.892	22901460
110	2.2	694.78	0.020673281	0.14382738	20.781	20673281
111	2.4	696.67	0.018491721	0.1231541	22.669	18491721
112	2.6	698.55	0.016379656	0.10466238	24.556	16379656
113	2.8	700.44	0.014382911	0.08828272	26.444	14382911
114	3	702.33	0.012515586	0.073899809	28.328	12515586
115	3.2	704.21	0.010786319	0.061384223	30.217	10786319
116	3.4	706.1	0.009216049	0.050597904	32.105	9216049
117	3.6	707.99	0.007798887	0.041381855	33.991	7798887
118	3.8	709.88	0.006547492	0.033582968	35.878	6547492
119	4	711.75	0.005443047	0.027035476	37.757	5443047
120	4.2	713.65	0.004482821	0.021592429	39.65	4482821
121	4.4	715.53	0.003659082	0.017109608	41.531	3659082
122	4.6	717.43	0.00296619	0.013450526	43.43	2966190
123	4.8	719.31	0.00237661	0.010484336	45.317	2376610
124	5	721.18	0.001888979	0.008107726	47.183	1888979
125	5.2	723.07	0.001486709	0.006218747	49.072	1486709
126	5.4	724.97	0.001161107	0.004732038	50.972	1161107
127	5.6	726.83	0.000897811	0.003570931	52.834	897811
128	5.8	728.73	0.000688783	0.00267312	54.734	688783
129	6	730.61	0.00052447	0.001984337	56.61	524470
130	6.2	732.51	0.000393298	0.001459867	58.515	393298
131	6.4	734.37	0.000294883	0.001066569	60.377	294883
132	6.6	736.26	0.00021796	0.000771686	62.265	217960
133	6.8	738.16	0.000159409	0.000553726	64.161	159409
134	7	740.04	0.000115785	0.000394317	66.045	115785
135	7.2	741.93	8.3397e-05	0.000278532	67.932	83397
136	7.4	743.85	6.0004e-05	0.000195135	69.848	60004
137	7.6	745.75	4.2114e-05	0.000135131	71.754	42114
138	7.8	747.57	2.9331e-05	9.3017e-05	73.573	29331
139	8	749.53	2.0511e-05	6.3686e-05	75.533	20511
140	8.2	751.27	1.4071e-05	4.3175e-05	77.277	14071
141	8.4	753.25	9.709e-06	2.9104e-05	79.248	9709
142	8.6	755.05	6.579e-06	1.9395e-05	81.049	6579
143	8.8	756.92	4.329e-06	1.2816e-05	82.924	4329
144	9	758.85	2.956e-06	8.487e-06	84.85	2956
145	9.2	761.05	2.021e-06	5.531e-06	87.056	2021
146	9.4	762.56	1.294e-06	3.51e-06	88.558	1294
147	9.6	764.55	8.2e-07	2.216e-06	90.551	820
148	9.8	766.42	5.25e-07	1.396e-06	92.419	525
149	10	768.6	3.32e-07	8.71e-07	94.604	332
150	10.2	770.98	2.17e-07	5.39e-07	96.979	217
151	10.4	771.8	1.22e-07	3.22e-07	97.797	122
152	10.6	774.76	8.2e-08	2e-07	100.76	82
153	10.8	776.56	5.7e-08	1.18e-07	102.56	57
154	11	776.94	3.1e-08	6.1e-08	102.94	31
155	11.2	776.42	1.2e-08	3e-08	102.42	12
156	11.4	778	7e-09	1.8e-08	104	7
157	11.6	777.5	6e-09	1.1e-08	103.5	6
158	11.8	781	2e-09	5e-09	107	2
159	12	792	1e-09	3e-09	118	1
160	12.2	786	2e-09	2e-09	112	2
161	12.4	0	0	0	0	0
162	12.6	0	0	0	0	0
163	12.8	0	0	0	0	0
164	13	0	0	0	0	0
165	13.2	0	0	0	0	0
166	13.4	0	0	0	0	0
167	13.6	0	0	0	0	0
168	13.8	0	0	0	0	0
169	14	0	0	0	0	0
170	14.2	0	0	0	0	0
171	14.4	0	0	0	0	0
172	14.6	0	0	0	0	0
173	14.8	0	0	0	0	0
174	15	0	0	0	0	0
175	15.2	0	0	0	0	0
176	15.4	0	0	0	0	0
177	15.6	0	0	0	0	0
178	15.8	0	0	0	0	0
179	16	0	0	0	0	0
180	16.2	0	0	0	0	0
181	16.4	0	0	0	0	0
182	16.6	0	0	0	0	0
183	16.8	0	0	0	0	0
184	17	0	0	0	0	0
185	17.2	0	0	0	0	0
186	17.4	0	0	0	0	0
187	17.6	0	0	0	0	0
188	17.8	0	0	0	0	0
189	18	0	0	0	0	0
190	18.2	0	0	0	0	0
191	18.4	0	0	0	0	0
192	18.6	0	0	0	0	0
193	18.8	0	0	0	0	0
194	19	0	0	0	0	0
195	19.2	0	0	0	0	0
196	19.4	0	0	0	0	0
197	19.6	0	0	0	0	0
198	19.8	0	0	0	0	0
199	20	0	0	0	0	0
