# Supplementary material for: Quantifying the Potential for Future Gene Therapy to Lower Lifetime Risk of Polygenic Late-Onset Diseases
Source: MDPI journal article supplement (doi:10.3390/ijms20133352), 2019-07-08
Supplement: s2 [file s2 › SuppFiles/Results/LODsCommonLow/CAD/0.250/FrailtyAnalysis.csv]

Age	Heritability	MeanOR	CaseOR	nControls	nCases	nCumIncidence	nIncidence	nLifeIncidence0	nAbsIncidence0	nLifeIncidence5	nAbsIncidence5	nLifeIncidence10	nAbsIncidence10	nLifeIncidence15	nAbsIncidence15	nIncActDivExp
36	0.565177	0.249974	19.3086	999989911	10089	1.0089e-05	1.0089e-05	9.83773e-06	9.83773e-06	9.89534e-06	9.89534e-06	9.94437e-06	9.94437e-06	9.98549e-06	9.98549e-06	0.256417
37	0.565155	0.249952	18.8351	999968854	21057	3.1146e-05	2.10572e-05	3.03433e-05	2.05055e-05	3.05257e-05	2.06304e-05	3.06801e-05	2.07358e-05	3.08119e-05	2.08264e-05	0.253941
38	0.565119	0.249915	18.0788	999934971	33883	6.5029e-05	3.38841e-05	6.32929e-05	3.29497e-05	6.36852e-05	3.31594e-05	6.40141e-05	3.33339e-05	6.4298e-05	3.34861e-05	0.258749
39	0.56507	0.249864	17.6051	999886872	48099	0.000113128	4.81021e-05	0.000109999	4.67056e-05	0.000110702	4.70173e-05	0.000111287	4.72731e-05	0.000111793	4.74951e-05	0.261587
40	0.565005	0.249797	17.2812	999823004	63868	0.000176996	6.38752e-05	0.00017192	6.19219e-05	0.000173058	6.23559e-05	0.000173995	6.27078e-05	0.000174803	6.30099e-05	0.263726
41	0.564922	0.24971	16.9111	999741139	81865	0.000258861	8.18795e-05	0.000251162	7.92416e-05	0.000252884	7.98262e-05	0.000254289	8.02936e-05	0.000255494	8.06915e-05	0.267198
42	0.564822	0.249605	16.2724	999639684	101455	0.000360316	0.000101481	0.000349197	9.80344e-05	0.000351682	9.87979e-05	0.000353688	9.93995e-05	0.000355402	9.99073e-05	0.269061
43	0.564701	0.249476	15.9344	999515471	124213	0.000484529	0.000124258	0.000469	0.000119803	0.000472474	0.000120792	0.000475249	0.00012156	0.000477602	0.0001222	0.273079
44	0.564558	0.249322	15.5156	999365932	149539	0.000634068	0.000149611	0.000612945	0.000143945	0.000617681	0.000145207	0.000621424	0.000146176	0.000624573	0.000146971	0.276701
45	0.56439	0.249139	15.13	999188153	177779	0.000811847	0.000177892	0.000783705	0.00017076	0.000790043	0.000172362	0.000794995	0.00017357	0.000799123	0.00017455	0.280174
46	0.564196	0.248926	14.7395	998978803	209350	0.0010212	0.00020952	0.000984319	0.000200614	0.000992684	0.000202641	0.000999131	0.000204136	0.00100445	0.000205332	0.283695
47	0.563973	0.24868	14.2739	998734146	244657	0.00126585	0.000244907	0.00121817	0.000233849	0.00122909	0.000236408	0.00123738	0.000238249	0.00124415	0.0002397	0.287315
48	0.563717	0.248396	13.9549	998451029	283117	0.00154897	0.000283476	0.00148802	0.000269856	0.00150216	0.000273066	0.0015127	0.000275319	0.00152123	0.000277071	0.290013
49	0.563429	0.248072	13.4263	998124388	326641	0.00187561	0.000327148	0.00179841	0.000310387	0.00181658	0.000314421	0.00182988	0.000317178	0.00184052	0.000319295	0.293474
50	0.563105	0.247703	12.8782	997748364	376024	0.00225164	0.000376731	0.00215452	0.00035611	0.00217776	0.000361179	0.00219444	0.000364567	0.00220764	0.000367122	0.29773
51	0.562741	0.247285	12.4463	997318198	430166	0.0026818	0.000431137	0.0025604	0.000405877	0.00258997	0.000412215	0.00261082	0.000416381	0.00262709	0.000419453	0.3014
52	0.562334	0.246812	12.0296	996826889	491309	0.00317311	0.00049263	0.00302207	0.000461676	0.00305958	0.000469605	0.00308557	0.000474745	0.00310554	0.000478442	0.305733
53	0.561879	0.246279	11.6161	996267951	558938	0.00373205	0.000560717	0.00354495	0.000522881	0.00359234	0.000532757	0.00362466	0.000539096	0.00364908	0.000543542	0.309914
54	0.561374	0.245682	11.2127	995635259	632692	0.00436474	0.000635062	0.00413395	0.000588992	0.00419355	0.000601209	0.00423369	0.000609023	0.00426344	0.000614363	0.313496
55	0.560813	0.245013	10.7595	994917247	718012	0.00508275	0.00072116	0.00479881	0.000664868	0.00487353	0.000679986	0.00492335	0.000689665	0.00495958	0.000696134	0.318782
56	0.560194	0.244266	10.3232	994106436	810811	0.00589356	0.000814953	0.00554528	0.000746469	0.00563856	0.000765029	0.00570033	0.000776976	0.0057444	0.000784829	0.323354
57	0.559513	0.243438	9.9012	993195202	911234	0.0068048	0.000916636	0.00637896	0.000833679	0.00649483	0.000856273	0.00657131	0.00087098	0.00662492	0.000880512	0.327183
58	0.558764	0.242519	9.47734	992170588	1024614	0.00782941	0.00103163	0.00731002	0.000931056	0.00745335	0.000958516	0.00754793	0.000976621	0.00761316	0.00098824	0.331949
59	0.557943	0.241502	9.08389	991020358	1150230	0.00897964	0.00115931	0.00834758	0.00103756	0.00852413	0.00107078	0.00864092	0.00109299	0.00872036	0.0011072	0.336943
60	0.557043	0.240378	8.68238	989731416	1288942	0.0102686	0.00130062	0.00950117	0.00115359	0.00971767	0.00119354	0.0098616	0.00122068	0.00995841	0.00123805	0.342096
61	0.556061	0.23914	8.25869	988288892	1442524	0.0117111	0.00145749	0.0107814	0.00128025	0.0110457	0.00132805	0.0112227	0.00136107	0.0113407	0.00138233	0.34757
62	0.554993	0.237783	7.88483	986683312	1605580	0.0133167	0.00162461	0.0121936	0.00141221	0.0125147	0.00146893	0.0127314	0.00150874	0.0128754	0.00153465	0.351892
63	0.553834	0.236297	7.47704	984891895	1791417	0.0151081	0.00181559	0.0137541	0.00156052	0.0141425	0.00162784	0.0144073	0.00167585	0.0145829	0.00170751	0.357834
64	0.552574	0.234671	7.13221	982900897	1990998	0.0170991	0.00202154	0.0154707	0.00171652	0.0159385	0.00179597	0.0162607	0.00185348	0.0164748	0.00189193	0.36318
65	0.551211	0.2329	6.76238	980689884	2211013	0.0193101	0.00224948	0.0173559	0.00188519	0.0179173	0.00197883	0.0183081	0.00204736	0.0185687	0.00209392	0.369044
66	0.549744	0.230979	6.40111	978245405	2444479	0.0217546	0.00249261	0.0194155	0.00205964	0.0200868	0.00216949	0.0205586	0.0022505	0.0208752	0.00230645	0.374107
67	0.548161	0.228897	6.06342	975541109	2704296	0.0244589	0.00276444	0.0216651	0.00224961	0.0224654	0.0023786	0.0230327	0.00247413	0.0234164	0.00254119	0.380272
68	0.546458	0.226644	5.73814	972555564	2985545	0.0274444	0.0030604	0.0241146	0.00244951	0.0250661	0.00260074	0.0257457	0.00271293	0.0262093	0.00279295	0.386574
69	0.544634	0.224222	5.40741	969272199	3283365	0.0307278	0.00337602	0.0267684	0.00265381	0.0278969	0.00283072	0.0287074	0.00296174	0.0292659	0.00305658	0.392343
70	0.542681	0.221619	5.10581	965664213	3607986	0.0343358	0.00372237	0.0296375	0.00286911	0.0309731	0.0030763	0.0319365	0.00322911	0.0326069	0.00334094	0.398797
71	0.540598	0.218835	4.80863	961714679	3949534	0.0382853	0.00408997	0.032723	0.00308547	0.0343009	0.00332776	0.0354418	0.00350523	0.036243	0.00363612	0.404773
72	0.538381	0.215867	4.51791	957395484	4319195	0.0426045	0.00449114	0.0360323	0.00330926	0.0378939	0.00359299	0.0392408	0.00379901	0.0401946	0.00395159	0.411457
73	0.536026	0.212714	4.24508	952689888	4705596	0.0473101	0.004915	0.0395613	0.00352908	0.0417546	0.00386073	0.0433399	0.00409909	0.0444705	0.00427593	0.417743
74	0.533533	0.209374	3.9784	947569312	5120576	0.0524307	0.00537486	0.0433127	0.00375136	0.0458934	0.00413876	0.0477545	0.00441465	0.0490895	0.00461899	0.424759
75	0.530896	0.20585	3.73024	942017307	5552005	0.0579827	0.00585921	0.0472772	0.00396449	0.0503084	0.00441501	0.0524884	0.00473383	0.0540585	0.00496899	0.431519
76	0.528124	0.202151	3.48684	936019443	5997864	0.0639806	0.00636704	0.0514418	0.00416456	0.0549941	0.00468568	0.057542	0.00505362	0.0593816	0.00532313	0.438034
77	0.525211	0.198279	3.25724	929551263	6468180	0.0704487	0.00691031	0.0557967	0.00435493	0.0599498	0.00495576	0.0629226	0.00538065	0.0650708	0.00568918	0.445166
78	0.522163	0.194246	3.04147	922607836	6943427	0.0773922	0.00746965	0.0603153	0.00451861	0.0651572	0.0052074	0.0686194	0.00569677	0.0711193	0.00604849	0.451697
79	0.518978	0.190057	2.83611	915166673	7441163	0.0848333	0.00806536	0.0649791	0.00466382	0.0706087	0.00545143	0.0746338	0.00601439	0.0775346	0.00641532	0.458962
80	0.515663	0.185729	2.64182	907226171	7940502	0.0927738	0.00867656	0.0697532	0.00477407	0.0762787	0.00567003	0.0809482	0.00631437	0.0843049	0.00677035	0.465806
81	0.512223	0.181276	2.45797	898781322	8444849	0.101219	0.00930843	0.074602	0.00484882	0.0821423	0.0058636	0.0875455	0.00659733	0.0914203	0.00711538	0.472658
82	0.508665	0.176711	2.28402	889823883	8957439	0.110176	0.00996621	0.0794882	0.00488624	0.0881732	0.00603091	0.0944085	0.00686297	0.0988717	0.00745138	0.479875
83	0.504996	0.172053	2.12048	880359582	9464301	0.11964	0.0106362	0.084364	0.00487577	0.0943323	0.00615913	0.101506	0.00709799	0.106637	0.00776503	0.486884
84	0.501222	0.167317	1.96799	870389104	9970478	0.129611	0.0113255	0.0891834	0.00481943	0.100581	0.0062491	0.108811	0.00730442	0.114695	0.00805874	0.494139
85	0.49735	0.16252	1.82685	859925669	10463435	0.140074	0.0120216	0.0938952	0.00471174	0.106872	0.00629093	0.116282	0.00747157	0.123016	0.00832063	0.501197
86	0.493392	0.157685	1.69416	848988242	10937427	0.151012	0.012719	0.0984472	0.00455205	0.113152	0.00628	0.123877	0.00759429	0.131561	0.00854459	0.507978
87	0.489355	0.152828	1.57029	837586092	11402150	0.162414	0.0134303	0.102794	0.0043469	0.119372	0.00621982	0.131554	0.0076769	0.140297	0.00873604	0.515095
88	0.485251	0.14797	1.45479	825749271	11836821	0.174251	0.0141321	0.106886	0.00409163	0.12547	0.00609803	0.139257	0.00770311	0.149174	0.00887732	0.521754
89	0.481088	0.143125	1.34815	813490754	12258517	0.186509	0.0148453	0.110683	0.00379763	0.131396	0.0059254	0.14694	0.00768315	0.158155	0.00898065	0.528844
90	0.476879	0.138313	1.24974	800852279	12638475	0.199148	0.0155361	0.114146	0.00346301	0.137087	0.00569117	0.154539	0.00759863	0.167179	0.00902469	0.535237
91	0.472637	0.133552	1.15745	787862729	12989550	0.212137	0.0162197	0.117248	0.00310171	0.142493	0.00540612	0.161997	0.00745827	0.176199	0.00901916	0.541585
92	0.468374	0.128856	1.07184	774549620	13313109	0.22545	0.0168978	0.119973	0.00272513	0.147568	0.00507542	0.169259	0.00726223	0.185162	0.00896352	0.548017
93	0.464088	0.124231	0.994408	760938349	13611271	0.239062	0.0175731	0.122319	0.00234549	0.152273	0.00470501	0.176271	0.00701219	0.19402	0.00885787	0.55467
94	0.459793	0.119694	0.922138	747072518	13865831	0.252927	0.018222	0.124291	0.00197186	0.156569	0.00429557	0.182974	0.00670233	0.202711	0.00869055	0.560843
95	0.4555	0.115255	0.85544	732987105	14085413	0.267013	0.0188541	0.125909	0.00161792	0.160428	0.00385947	0.189316	0.00634273	0.211179	0.00846857	0.566905
96	0.451211	0.11092	0.794199	718710887	14276218	0.281289	0.0194768	0.127203	0.001294	0.163837	0.00340895	0.195258	0.00594162	0.219376	0.00819705	0.573106
97	0.446942	0.106699	0.737262	704286886	14424001	0.295713	0.0200693	0.12821	0.00100737	0.16679	0.00295252	0.200757	0.00549893	0.227244	0.00786822	0.578867
98	0.442701	0.102601	0.684627	689751570	14535316	0.310248	0.0206383	0.128974	0.000763686	0.169295	0.00250473	0.205781	0.00502442	0.234733	0.00748823	0.584419
99	0.438488	0.0986231	0.636882	675131356	14620214	0.324869	0.0211963	0.129538	0.000564267	0.171374	0.00207914	0.210311	0.00452927	0.2418	0.00706697	0.590124
100	0.434311	0.0947712	0.592682	660459063	14672293	0.339541	0.0217325	0.129944	0.000406643	0.173059	0.00168533	0.214331	0.00402028	0.248407	0.00660701	0.595683
101	0.430175	0.0910495	0.551728	645772772	14686291	0.354227	0.0222365	0.13023	0.000285942	0.17439	0.00133117	0.217838	0.00350687	0.254519	0.00611229	0.600823
102	0.426084	0.0874565	0.514329	631097648	14675124	0.368902	0.0227249	0.130427	0.000196133	0.175415	0.00102491	0.220842	0.00300392	0.260114	0.00559467	0.605997
103	0.422043	0.0839935	0.47968	616464028	14633620	0.383536	0.0231876	0.130557	0.000130825	0.176184	0.00076885	0.223363	0.00252167	0.265172	0.0050584	0.610925
104	0.418049	0.0806567	0.447806	601885260	14578768	0.398115	0.023649	0.130642	8.47755e-05	0.176747	0.000562668	0.225436	0.00207325	0.269688	0.00451643	0.616244
105	0.414111	0.0774479	0.418317	587398288	14486972	0.412602	0.0240693	0.130695	5.31672e-05	0.177148	0.000401506	0.227101	0.00166405	0.273658	0.0039695	0.620896
106	0.410228	0.0743644	0.391282	573025843	14372445	0.426974	0.024468	0.130728	3.21943e-05	0.177428	0.000279832	0.228403	0.00130272	0.27709	0.00343192	0.625383
107	0.406402	0.0714033	0.36637	558787273	14238570	0.441213	0.024848	0.130746	1.87237e-05	0.177618	0.000190298	0.229398	0.000994422	0.280004	0.00291456	0.629768
108	0.402642	0.0685637	0.342778	544696937	14090336	0.455303	0.0252159	0.130757	1.04973e-05	0.177744	0.000125968	0.230138	0.000740306	0.282432	0.00242805	0.634198
109	0.398941	0.0658407	0.321415	530774379	13922558	0.469226	0.0255602	0.130762	5.56902e-06	0.177825	8.09597e-05	0.230675	0.000537341	0.284412	0.00197993	0.638365
110	0.395301	0.0632293	0.301592	517025519	13748860	0.482974	0.0259034	0.130765	2.81852e-06	0.177876	5.04583e-05	0.231056	0.00038105	0.285992	0.00157926	0.642817
111	0.391725	0.0607286	0.283215	503475484	13550035	0.496525	0.0262077	0.130766	1.355e-06	0.177906	3.03521e-05	0.23132	0.000263819	0.28722	0.00122818	0.646596
112	0.388209	0.058333	0.266389	490134098	13341386	0.509866	0.0264986	0.130767	6.00362e-07	0.177924	1.75439e-05	0.231499	0.000178308	0.288152	0.000931762	0.65032
113	0.384757	0.0560397	0.250416	477003147	13130951	0.522997	0.0267905	0.130767	2.62619e-07	0.177933	9.78256e-06	0.231616	0.000117391	0.288841	0.0006899	0.654325
114	0.38136	0.0538426	0.235834	464086703	12916444	0.535913	0.0270783	0.130767	6.45822e-08	0.177938	5.16658e-06	0.231691	7.51091e-05	0.28934	0.00049851	0.658462
115	0.378025	0.0517408	0.222244	451408084	12678619	0.548592	0.0273195	0.130767	0	0.177941	2.59912e-06	0.231738	4.65305e-05	0.289691	0.000351388	0.661687
116	0.374758	0.0497309	0.209512	438972162	12435922	0.561028	0.0275492	0.130767	0	0.177942	1.24359e-06	0.231765	2.78565e-05	0.289933	0.000242127	0.664839
117	0.371547	0.0478074	0.197749	426776727	12195435	0.573223	0.0277818	0.130767	0	0.177943	5.48795e-07	0.231781	1.6037e-05	0.290096	0.000162992	0.668253
118	0.368403	0.0459684	0.186616	414828235	11948492	0.585172	0.0279971	0.130767	0	0.177943	2.3897e-07	0.23179	8.90163e-06	0.290203	0.00010682	0.671423
119	0.365313	0.0442084	0.176408	403125587	11702648	0.596874	0.0282108	0.130767	0	0.177943	5.85132e-08	0.231795	4.68106e-06	0.290271	6.80509e-05	0.674719
120	0.362279	0.0425235	0.166898	391669342	11456245	0.608331	0.0284186	0.130767	0	0.177943	0	0.231797	2.34853e-06	0.290313	4.20444e-05	0.678017
