# Supplementary material for: Quantifying the Potential for Future Gene Therapy to Lower Lifetime Risk of Polygenic Late-Onset Diseases
Source: MDPI journal article supplement (doi:10.3390/ijms20133352), 2019-07-08
Supplement: s2 [file s2 › SuppFiles/Results/LODsCommonLow/CAD/0.250/IndividualsByBetaDistrib.csv]

nEntry	Beta	nDetrimentalCount	nFractionPopulation	nCumulativeFractionPopulation	nEditsNeeded	nIndividuals
0	-19.8	0	0	1	0	0
1	-19.6	0	0	1	0	0
2	-19.4	0	0	1	0	0
3	-19.2	0	0	1	0	0
4	-19	0	0	1	0	0
5	-18.8	0	0	1	0	0
6	-18.6	0	0	1	0	0
7	-18.4	0	0	1	0	0
8	-18.2	0	0	1	0	0
9	-18	0	0	1	0	0
10	-17.8	0	0	1	0	0
11	-17.6	0	0	1	0	0
12	-17.4	0	0	1	0	0
13	-17.2	0	0	1	0	0
14	-17	0	0	1	0	0
15	-16.8	0	0	1	0	0
16	-16.6	0	0	1	0	0
17	-16.4	0	0	1	0	0
18	-16.2	0	0	1	0	0
19	-16	0	0	1	0	0
20	-15.8	0	0	1	0	0
21	-15.6	0	0	1	0	0
22	-15.4	0	0	1	0	0
23	-15.2	0	0	1	0	0
24	-15	0	0	1	0	0
25	-14.8	0	0	1	0	0
26	-14.6	0	0	1	0	0
27	-14.4	0	0	1	0	0
28	-14.2	0	0	1	0	0
29	-14	0	0	1	0	0
30	-13.8	0	0	1	0	0
31	-13.6	0	0	1	0	0
32	-13.4	0	0	1	0	0
33	-13.2	0	0	1	0	0
34	-13	0	0	1	0	0
35	-12.8	549	1e-09	1	0	1
36	-12.6	0	0	1	0	0
37	-12.4	0	0	1	0	0
38	-12.2	565	1e-09	1	0	1
39	-12	563	2e-09	1	0	2
40	-11.8	554	1e-09	1	0	1
41	-11.6	568	8e-09	1	0	8
42	-11.4	562.75	1.2e-08	0.99999999	0	12
43	-11.2	566.31	1.3e-08	0.99999998	0	13
44	-11	568.23	2.6e-08	0.99999996	0	26
45	-10.8	569.96	5e-08	0.99999994	0	50
46	-10.6	573.51	5.9e-08	0.99999989	0	59
47	-10.4	575.77	1.2e-07	0.99999983	0	120
48	-10.2	577.14	2.09e-07	0.99999971	0	209
49	-10	578.92	2.95e-07	0.9999995	0	295
50	-9.8	580.85	4.97e-07	0.9999992	0	497
51	-9.6	582.91	8.12e-07	0.99999871	0	812
52	-9.4	585.08	1.193e-06	0.99999789	0	1193
53	-9.2	586.69	1.92e-06	0.9999967	0	1920
54	-9	588.73	3e-06	0.99999478	0	3000
55	-8.8	590.56	4.549e-06	0.99999178	0	4549
56	-8.6	592.29	6.965e-06	0.99998723	0	6965
57	-8.4	594.39	1.058e-05	0.99998027	0	10580
58	-8.2	596.15	1.5483e-05	0.99996969	0	15483
59	-8	598.2	2.2958e-05	0.9999542	0	22958
60	-7.8	600.05	3.3484e-05	0.99993125	0	33484
61	-7.6	601.92	4.7934e-05	0.99989776	0	47934
62	-7.4	603.84	6.8538e-05	0.99984983	0	68538
63	-7.2	605.76	9.7393e-05	0.99978129	0	97393
64	-7	607.66	0.000135336	0.9996839	0	135336
65	-6.8	609.63	0.000188928	0.99954856	0	188928
66	-6.6	611.47	0.000259339	0.99935963	0	259339
67	-6.4	613.37	0.000350294	0.99910029	0	350294
68	-6.2	615.28	0.000474361	0.99875	0	474361
69	-6	617.17	0.000632258	0.99827564	0	632258
70	-5.8	619.06	0.000832205	0.99764338	0	832205
71	-5.6	620.96	0.001089324	0.99681118	0	1089324
72	-5.4	622.87	0.00141147	0.99572185	0	1411470
73	-5.2	624.75	0.001805759	0.99431038	0	1805759
74	-5	626.66	0.002290549	0.99250462	0	2290549
75	-4.8	628.55	0.002878173	0.99021407	0	2878173
76	-4.6	630.45	0.00357896	0.9873359	0	3578960
77	-4.4	632.35	0.004410645	0.98375694	0	4410645
78	-4.2	634.24	0.005382286	0.9793463	0	5382286
79	-4	636.13	0.006502544	0.97396401	0	6502544
80	-3.8	638.04	0.007791733	0.96746147	0	7791733
81	-3.6	639.93	0.009226452	0.95966973	0	9226452
82	-3.4	641.83	0.010826107	0.95044328	0	10826107
83	-3.2	643.72	0.012599354	0.93961717	0	12599354
84	-3	645.61	0.014508042	0.92701782	0	14508042
85	-2.8	647.51	0.016539243	0.91250978	0	16539243
86	-2.6	649.4	0.018690508	0.89597054	0	18690508
87	-2.4	651.29	0.020902994	0.87728003	0	20902994
88	-2.2	653.19	0.023179928	0.85637703	0	23179928
89	-2	655.08	0.025452402	0.8331971	0	25452402
90	-1.8	656.98	0.027676112	0.8077447	0	27676112
91	-1.6	658.87	0.029817215	0.78006859	0	29817215
92	-1.4	660.76	0.031803901	0.75025138	0	31803901
93	-1.2	662.65	0.033622841	0.71844747	0	33622841
94	-1	664.54	0.035208554	0.68482463	0	35208554
95	-0.8	666.43	0.036518324	0.64961608	0	36518324
96	-0.6	668.33	0.037532944	0.61309776	0	37532944
97	-0.4	670.22	0.038209914	0.57556481	0	38209914
98	-0.2	672.11	0.038532848	0.5373549	0	38532848
99	0	674	0.038505187	0.49882205	0	38505187
100	0.2	675.89	0.038115961	0.46031686	1.888	38115961
101	0.4	677.78	0.037367355	0.4222009	3.7804	37367355
102	0.6	679.67	0.036323146	0.38483355	5.6682	36323146
103	0.8	681.56	0.034962576	0.3485104	7.5584	34962576
104	1	683.45	0.033339165	0.31354783	9.4492	33339165
105	1.2	685.34	0.031499165	0.28020866	11.338	31499165
106	1.4	687.22	0.029494652	0.2487095	13.226	29494652
107	1.6	689.11	0.027371613	0.21921484	15.114	27371613
108	1.8	691	0.025148863	0.19184323	17.001	25148863
109	2	692.89	0.022903043	0.16669437	18.892	22903043
110	2.2	694.78	0.020669986	0.14379132	20.78	20669986
111	2.4	696.67	0.01848981	0.12312134	22.667	18489810
112	2.6	698.55	0.016366868	0.10463153	24.555	16366868
113	2.8	700.44	0.014387578	0.08826466	26.441	14387578
114	3	702.33	0.012511049	0.073877082	28.327	12511049
115	3.2	704.21	0.010784981	0.061366033	30.216	10784981
116	3.4	706.1	0.00920981	0.050581052	32.106	9209810
117	3.6	707.98	0.007797268	0.041371242	33.985	7797268
118	3.8	709.87	0.006543056	0.033573974	35.876	6543056
119	4	711.77	0.005443478	0.027030918	37.767	5443478
120	4.2	713.65	0.004483436	0.02158744	39.649	4483436
121	4.4	715.53	0.003659319	0.017104004	41.532	3659319
122	4.6	717.42	0.002962081	0.013444685	43.422	2962081
123	4.8	719.3	0.002375838	0.010482604	45.302	2375838
124	5	721.19	0.001887996	0.008106766	47.188	1887996
125	5.2	723.09	0.001486188	0.00621877	49.088	1486188
126	5.4	724.95	0.001161543	0.004732582	50.956	1161543
127	5.6	726.85	0.000899026	0.003571039	52.854	899026
128	5.8	728.73	0.000687651	0.002672013	54.728	687651
129	6	730.59	0.000523156	0.001984362	56.594	523156
130	6.2	732.49	0.000393578	0.001461206	58.495	393578
131	6.4	734.38	0.000294581	0.001067628	60.376	294581
132	6.6	736.27	0.000218353	0.000773047	62.275	218353
133	6.8	738.14	0.000159694	0.000554694	64.138	159694
134	7	740.06	0.000115822	0.000395	66.062	115822
135	7.2	741.97	8.3766e-05	0.000279178	67.969	83766
136	7.4	743.75	5.9849e-05	0.000195412	69.756	59849
137	7.6	745.66	4.2365e-05	0.000135563	71.661	42365
138	7.8	747.52	2.9798e-05	9.3198e-05	73.519	29798
139	8	749.41	2.0568e-05	6.34e-05	75.415	20568
140	8.2	751.31	1.3981e-05	4.2832e-05	77.311	13981
141	8.4	753.38	9.659e-06	2.8851e-05	79.385	9659
142	8.6	755.02	6.506e-06	1.9192e-05	81.022	6506
143	8.8	756.97	4.324e-06	1.2686e-05	82.973	4324
144	9	758.95	2.958e-06	8.362e-06	84.947	2958
145	9.2	760.61	1.952e-06	5.404e-06	86.61	1952
146	9.4	762.44	1.225e-06	3.452e-06	88.44	1225
147	9.6	764.25	8.21e-07	2.227e-06	90.248	821
148	9.8	766.49	5.07e-07	1.406e-06	92.494	507
149	10	768.4	3.47e-07	8.99e-07	94.399	347
150	10.2	769.69	2.02e-07	5.52e-07	95.689	202
151	10.4	771.54	1.27e-07	3.5e-07	97.537	127
152	10.6	773.1	7.9e-08	2.23e-07	99.102	79
153	10.8	776.32	6.2e-08	1.44e-07	102.32	62
154	11	777.62	3.7e-08	8.2e-08	103.62	37
155	11.2	777.37	1.9e-08	4.5e-08	103.37	19
156	11.4	783	1e-08	2.6e-08	109	10
157	11.6	788.75	8e-09	1.6e-08	114.75	8
158	11.8	791	2e-09	8e-09	117	2
159	12	799.5	2e-09	6e-09	125.5	2
160	12.2	794	1e-09	4e-09	120	1
161	12.4	0	0	3e-09	0	0
162	12.6	0	0	3e-09	0	0
163	12.8	795	2e-09	3e-09	121	2
164	13	0	0	1e-09	0	0
165	13.2	794	1e-09	1e-09	120	1
166	13.4	0	0	0	0	0
167	13.6	0	0	0	0	0
168	13.8	0	0	0	0	0
169	14	0	0	0	0	0
170	14.2	0	0	0	0	0
171	14.4	0	0	0	0	0
172	14.6	0	0	0	0	0
173	14.8	0	0	0	0	0
174	15	0	0	0	0	0
175	15.2	0	0	0	0	0
176	15.4	0	0	0	0	0
177	15.6	0	0	0	0	0
178	15.8	0	0	0	0	0
179	16	0	0	0	0	0
180	16.2	0	0	0	0	0
181	16.4	0	0	0	0	0
182	16.6	0	0	0	0	0
183	16.8	0	0	0	0	0
184	17	0	0	0	0	0
185	17.2	0	0	0	0	0
186	17.4	0	0	0	0	0
187	17.6	0	0	0	0	0
188	17.8	0	0	0	0	0
189	18	0	0	0	0	0
190	18.2	0	0	0	0	0
191	18.4	0	0	0	0	0
192	18.6	0	0	0	0	0
193	18.8	0	0	0	0	0
194	19	0	0	0	0	0
195	19.2	0	0	0	0	0
196	19.4	0	0	0	0	0
197	19.6	0	0	0	0	0
198	19.8	0	0	0	0	0
199	20	0	0	0	0	0
