# Supplementary material for: Quantifying the Potential for Future Gene Therapy to Lower Lifetime Risk of Polygenic Late-Onset Diseases
Source: MDPI journal article supplement (doi:10.3390/ijms20133352), 2019-07-08
Supplement: s2 [file s2 › SuppFiles/Results/LODsCommonLow/CAD/1.000/FrailtyAnalysis.csv]

Age	Heritability	MeanOR	CaseOR	nControls	nCases	nCumIncidence	nIncidence	nLifeIncidence0	nAbsIncidence0	nLifeIncidence5	nAbsIncidence5	nLifeIncidence10	nAbsIncidence10	nLifeIncidence15	nAbsIncidence15	nIncActDivExp
36	0.565138	0.999905	72.0964	999960721	39279	3.9279e-05	3.9279e-05	3.83008e-05	3.83008e-05	3.8525e-05	3.8525e-05	3.87159e-05	3.87159e-05	3.8876e-05	3.8876e-05	0.998296
37	0.565054	0.999556	68.2565	999878046	82675	0.000121954	8.26782e-05	0.00011881	8.05097e-05	0.000119525	8.1e-05	0.00012013	8.14138e-05	0.000120646	8.17697e-05	0.997064
38	0.564926	0.999012	64.9806	999747568	130478	0.000252432	0.000130494	0.000245694	0.000126884	0.000247217	0.000127692	0.000248493	0.000128364	0.000249595	0.000128949	0.99649
39	0.56475	0.998254	62.039	999563816	183752	0.000436184	0.000183798	0.000424123	0.000178429	0.000426836	0.000179619	0.00042909	0.000180597	0.00043104	0.000181445	0.999526
40	0.564526	0.997269	58.6004	999321528	242288	0.000678472	0.000242394	0.000659029	0.000234905	0.000663388	0.000236552	0.000666977	0.000237887	0.000670073	0.000239033	1.00079
41	0.564251	0.996037	56.0132	999015199	306329	0.000984801	0.000306537	0.000955541	0.000296513	0.000962088	0.0002987	0.000967426	0.000300449	0.000972011	0.000301938	1.00032
42	0.56392	0.994544	53.7172	998639397	375802	0.0013606	0.000376172	0.00131867	0.000363132	0.00132805	0.00036596	0.00133561	0.000368188	0.00134208	0.000370069	0.997361
43	0.563532	0.992761	51.1835	998185030	454367	0.00181497	0.000454986	0.00175691	0.000438237	0.0017699	0.000441851	0.00178028	0.000444664	0.00178908	0.000447004	0.999914
44	0.563082	0.990669	48.6904	997644197	540833	0.0023558	0.000541816	0.00227751	0.0005206	0.00229506	0.000525165	0.00230895	0.00052867	0.00232063	0.000531547	1.00207
45	0.56257	0.988249	46.3006	997009949	634248	0.00299005	0.000635746	0.00288672	0.000609208	0.00290999	0.000614922	0.00292818	0.000619232	0.00294336	0.000622727	1.00128
46	0.561991	0.98548	43.9562	996273325	736624	0.00372668	0.000738833	0.0035926	0.000705885	0.00362301	0.000713019	0.00364646	0.000718278	0.00366584	0.000722485	1.0004
47	0.561343	0.982333	41.7489	995423704	849621	0.0045763	0.000852799	0.00440469	0.000812089	0.00444398	0.000820976	0.00447383	0.000827369	0.00449825	0.000832408	1.00047
48	0.560619	0.978781	39.8335	994450653	973051	0.00554935	0.000977524	0.00533217	0.000927473	0.00538249	0.000938508	0.00542008	0.000946248	0.00545052	0.000952271	1.00007
49	0.559819	0.974807	37.6622	993343512	1107141	0.00665649	0.00111332	0.00638422	0.00105205	0.00644821	0.00106572	0.00649514	0.00107507	0.00653276	0.00108224	0.998725
50	0.558934	0.970359	35.8886	992085214	1258298	0.00791479	0.00126673	0.00757587	0.00119166	0.00765683	0.00120862	0.0077151	0.00121996	0.00776127	0.00122851	1.0011
51	0.557963	0.965422	33.9671	990664079	1421135	0.00933592	0.00143247	0.00891676	0.00134089	0.00901866	0.00136183	0.0090907	0.00137559	0.00914701	0.00138574	1.00142
52	0.556903	0.959972	32.1598	989066925	1597154	0.0109331	0.00161221	0.0104176	0.00150082	0.0105453	0.0015266	0.010634	0.00154331	0.0107023	0.00155532	1.00056
53	0.555748	0.953977	30.4249	987277324	1789601	0.0127227	0.00180938	0.0120917	0.00167415	0.012251	0.00170578	0.0123601	0.00172607	0.0124426	0.00174031	1.00006
54	0.554496	0.947415	28.7626	985280815	1996509	0.0147192	0.00202224	0.0139503	0.00185861	0.0141482	0.00189716	0.0142819	0.00192182	0.0143813	0.00193867	0.998268
55	0.55314	0.940244	27.2054	983056202	2224613	0.0169438	0.00225785	0.0160103	0.00205996	0.016255	0.0021068	0.0164187	0.00213679	0.0165381	0.00215683	0.99806
56	0.55167	0.93241	25.6797	980575359	2480843	0.0194246	0.0025236	0.0182943	0.00228398	0.0185958	0.00234076	0.018796	0.00237732	0.0189395	0.00240134	1.00131
57	0.550087	0.923915	24.2631	977829433	2745926	0.0221706	0.00280032	0.0208065	0.00251222	0.0211761	0.00258031	0.0214206	0.00262462	0.0215928	0.00265335	0.999543
58	0.548388	0.914732	22.7956	974791884	3037549	0.0252081	0.00310642	0.0235667	0.00276019	0.0240177	0.0028416	0.0243159	0.00289527	0.0245225	0.00292972	0.999554
59	0.546569	0.904837	21.4218	971441520	3350364	0.0285585	0.003437	0.0265889	0.00302218	0.0271366	0.00311895	0.0274995	0.00318365	0.0277476	0.00322503	0.998938
60	0.544621	0.894189	20.1364	967749026	3692494	0.032251	0.00380105	0.0298936	0.00330475	0.0305558	0.00341919	0.0309965	0.00349694	0.0312943	0.00354671	0.999769
61	0.54254	0.882779	18.9276	963694579	4054447	0.0363054	0.00418956	0.033492	0.00359834	0.0342885	0.00373271	0.034822	0.00382551	0.0351795	0.00388525	0.999091
62	0.540324	0.87059	17.7325	959248841	4445738	0.0407512	0.00461322	0.0374023	0.00391032	0.0383559	0.00406736	0.0389996	0.00417759	0.0394289	0.00424935	0.99923
63	0.537969	0.85761	16.6059	954386499	4862342	0.0456135	0.00506891	0.0416379	0.00423563	0.0427742	0.00441836	0.0435483	0.00454867	0.0440635	0.00463459	0.999027
64	0.53547	0.843832	15.5256	949078918	5307581	0.0509211	0.00556125	0.0462138	0.00457588	0.0475619	0.00478768	0.0484892	0.00494099	0.049107	0.00504348	0.999108
65	0.532822	0.829241	14.5114	943295102	5783816	0.0567049	0.00609414	0.0511453	0.00493148	0.0527384	0.00517646	0.053845	0.00535573	0.0545845	0.00547751	0.999789
66	0.530022	0.813853	13.5529	937012791	6282311	0.0629872	0.00665996	0.0564386	0.00529329	0.058314	0.00557558	0.0596287	0.00578378	0.060512	0.00592758	0.99957
67	0.527068	0.797673	12.6391	930202563	6810228	0.0697974	0.00726802	0.0621038	0.00566519	0.064304	0.00599004	0.0658594	0.00623061	0.0669115	0.00639947	0.99978
68	0.52396	0.780728	11.7664	922839638	7362925	0.0771604	0.0079154	0.0681447	0.00604095	0.0707179	0.00641392	0.07255	0.00669062	0.0737995	0.00688794	0.999833
69	0.520692	0.763032	10.9515	914897518	7942120	0.0851025	0.00860618	0.074564	0.0064193	0.0775651	0.00684722	0.0797141	0.00716415	0.081193	0.00739356	1.00017
70	0.517268	0.744637	10.1725	906358033	8539485	0.093642	0.00933382	0.0813547	0.00679068	0.0848462	0.00728106	0.0873569	0.00764275	0.0891004	0.00790744	0.999981
71	0.513689	0.725587	9.43805	897202226	9155807	0.102798	0.0101018	0.0885074	0.00715275	0.0925606	0.00771441	0.0954827	0.00812582	0.0975297	0.00842925	0.999745
72	0.509953	0.705917	8.74645	887405527	9796699	0.112594	0.0109192	0.0960134	0.00750599	0.10071	0.00814953	0.1041	0.00861683	0.106493	0.0089629	1.00036
73	0.506062	0.685704	8.09797	876963554	10441973	0.123036	0.0117669	0.103845	0.00783122	0.109277	0.00856717	0.113196	0.00909611	0.115981	0.00948852	1.00011
74	0.502026	0.665014	7.48613	865865334	11098220	0.134135	0.0126553	0.111975	0.00813061	0.118248	0.00897025	0.122764	0.00956822	0.125992	0.0100111	1.00011
75	0.497844	0.643924	6.91432	854110182	11755152	0.14589	0.0135762	0.120369	0.00839394	0.127595	0.00934781	0.132787	0.0100229	0.136513	0.0105207	0.99986
76	0.493523	0.622509	6.38085	841697265	12412917	0.158303	0.0145332	0.128988	0.00861878	0.137293	0.00969728	0.143245	0.0104588	0.147529	0.0110165	0.999839
77	0.489066	0.60085	5.88554	828635239	13062026	0.171365	0.0155187	0.137782	0.00879447	0.1473	0.0100078	0.154111	0.0108658	0.159018	0.0114889	0.999723
78	0.484489	0.579051	5.41927	814941834	13693405	0.185058	0.0165253	0.146694	0.00891133	0.15757	0.0102697	0.165346	0.0112348	0.170947	0.0119285	0.999297
79	0.479794	0.557183	4.98674	800627006	14314828	0.199373	0.0175655	0.155666	0.00897196	0.168057	0.0104871	0.176916	0.0115701	0.183288	0.0123414	0.999568
80	0.474999	0.535342	4.58046	785712860	14914146	0.214287	0.0186281	0.164633	0.00896683	0.178707	0.0106497	0.188776	0.0118599	0.196005	0.0127163	1.00006
81	0.470111	0.513628	4.20986	770248213	15464647	0.229752	0.0196823	0.173512	0.00887941	0.189445	0.0107377	0.200857	0.0120814	0.209035	0.01303	0.999418
82	0.465147	0.492118	3.86198	754253469	15994744	0.245747	0.0207657	0.182237	0.00872505	0.200214	0.010769	0.213112	0.0122548	0.22234	0.0133055	0.999873
83	0.460111	0.470893	3.54588	737783250	16470219	0.262217	0.0218365	0.190722	0.00848505	0.210932	0.0107184	0.225465	0.0123523	0.235853	0.0135131	0.999592
84	0.455017	0.450022	3.25302	720873708	16909542	0.279126	0.0229194	0.198896	0.00817357	0.22153	0.0105982	0.237853	0.012388	0.24952	0.0136673	0.999992
85	0.449887	0.429585	2.98121	703579220	17294488	0.296421	0.023991	0.206683	0.00778779	0.231928	0.010398	0.250202	0.0123494	0.263273	0.0137527	1.00022
86	0.444728	0.409645	2.73427	685963247	17615973	0.314037	0.0250377	0.214015	0.00733159	0.242043	0.0101147	0.262433	0.0122315	0.277035	0.013762	0.999963
87	0.439554	0.390246	2.50689	668072345	17890902	0.331928	0.0260814	0.220836	0.00682064	0.251802	0.0097594	0.274479	0.0120457	0.290743	0.0137076	1.00031
88	0.43438	0.371447	2.29873	649975958	18096387	0.350024	0.0270875	0.227091	0.00625538	0.261125	0.00932281	0.286256	0.0117767	0.304315	0.0135718	1.00007
89	0.429212	0.353274	2.10894	631728148	18247810	0.368272	0.0280746	0.232744	0.00565308	0.269946	0.00882044	0.297693	0.011437	0.317683	0.0133684	1.00012
90	0.424073	0.335775	1.93352	613395322	18332826	0.386605	0.0290201	0.237767	0.00502329	0.278201	0.00825536	0.308715	0.0110222	0.330774	0.0130908	0.999776
91	0.418961	0.318946	1.77593	595026916	18368406	0.404973	0.0299455	0.242153	0.0043861	0.285846	0.00764475	0.319262	0.0105467	0.343528	0.0127539	0.999899
92	0.4139	0.30282	1.62983	576684490	18342426	0.423316	0.0308262	0.245908	0.0037546	0.292838	0.00699277	0.329267	0.0100057	0.355877	0.0123497	0.999736
93	0.408889	0.287392	1.49787	558418801	18265689	0.441581	0.0316736	0.249056	0.00314754	0.299152	0.0063139	0.338677	0.00941003	0.367764	0.0118869	0.99973
94	0.403945	0.27267	1.37602	540278234	18140567	0.459722	0.0324856	0.251635	0.00257977	0.304772	0.00561986	0.347446	0.00876861	0.379134	0.0113698	0.999852
95	0.399065	0.258633	1.26698	522306961	17971273	0.477693	0.033263	0.2537	0.00206427	0.309696	0.00492422	0.355539	0.00809255	0.389939	0.0108049	1.00015
96	0.394265	0.245284	1.16657	504557516	17749445	0.495442	0.0339828	0.255308	0.00160881	0.313935	0.0042383	0.362926	0.00738714	0.40013	0.0101913	0.999948
97	0.389543	0.232601	1.07561	487064238	17493278	0.512936	0.0346705	0.25653	0.00122173	0.317516	0.00358079	0.369595	0.00666905	0.409673	0.0095425	1.00002
98	0.384901	0.220566	0.992726	469861675	17202563	0.530138	0.0353189	0.257434	0.000903823	0.32048	0.00296435	0.375541	0.00594641	0.418535	0.00886233	1.00013
99	0.380349	0.209163	0.916658	452983126	16878549	0.547017	0.0359224	0.258085	0.000651428	0.32288	0.0024003	0.38077	0.00522889	0.426694	0.00815858	1.00011
100	0.375887	0.198374	0.847211	436458208	16524918	0.563542	0.0364802	0.258543	0.000457988	0.324778	0.00189813	0.385298	0.00452791	0.434135	0.00744125	0.999915
101	0.371515	0.188164	0.7845	420305146	16153062	0.579695	0.0370094	0.258858	0.0003145	0.326242	0.00146411	0.389155	0.00385711	0.440858	0.00672274	0.999983
102	0.367238	0.178512	0.72666	404538502	15766644	0.595461	0.0375124	0.259069	0.000210721	0.327344	0.00110114	0.392382	0.00322735	0.446868	0.0060108	1.00033
103	0.363059	0.169396	0.67375	389179850	15358652	0.61082	0.0379659	0.259206	0.000137306	0.328151	0.000806944	0.395029	0.0026466	0.452178	0.00530903	1.00029
104	0.358978	0.160789	0.625513	374240555	14939295	0.625759	0.0383866	0.259293	8.6872e-05	0.328727	0.000576582	0.397154	0.00212452	0.456806	0.00462812	1.00027
105	0.354986	0.152663	0.581503	359728661	14511894	0.640271	0.0387769	0.259346	5.32587e-05	0.329129	0.000402197	0.39882	0.00166691	0.460782	0.00397633	1.0003
106	0.351088	0.144993	0.541141	345648553	14080108	0.654351	0.0391409	0.259378	3.15394e-05	0.329403	0.00027414	0.400097	0.00127622	0.464144	0.00336212	1.00041
107	0.347282	0.137756	0.504088	332007569	13640984	0.667992	0.0394649	0.259396	1.79379e-05	0.329586	0.000182312	0.401049	0.000952686	0.466936	0.00279224	1.00023
108	0.343577	0.130931	0.469773	318801947	13205622	0.681198	0.0397751	0.259405	9.83819e-06	0.329704	0.000118058	0.401743	0.000693823	0.469212	0.00227559	1.00037
109	0.339957	0.124489	0.438591	306029450	12772497	0.693971	0.040064	0.259411	5.109e-06	0.329778	7.42721e-05	0.402236	0.000492955	0.471028	0.00181638	1.0006
110	0.336415	0.118408	0.409995	293690358	12339092	0.70631	0.0403199	0.259413	2.52951e-06	0.329823	4.52845e-05	0.402578	0.000341978	0.472446	0.00141733	1.00058
111	0.332971	0.112673	0.383382	281783850	11906508	0.718216	0.040541	0.259414	1.19065e-06	0.32985	2.66706e-05	0.40281	0.00023182	0.473525	0.00107921	1.00023
112	0.329613	0.107261	0.358769	270294661	11489189	0.729705	0.0407731	0.259415	5.17014e-07	0.329865	1.51083e-05	0.402963	0.000153553	0.474327	0.000802405	1.00064
113	0.326332	0.102149	0.336515	259223098	11071563	0.740777	0.0409611	0.259415	2.21431e-07	0.329873	8.24831e-06	0.403062	9.89798e-05	0.474909	0.0005817	1.00042
114	0.323135	0.0973232	0.315567	248559223	10663875	0.751441	0.0411378	0.259415	5.33194e-08	0.329878	4.26555e-06	0.403124	6.20104e-05	0.475321	0.000411572	1.00035
115	0.320015	0.092764	0.296352	238291617	10267606	0.761708	0.0413085	0.259415	0	0.32988	2.10486e-06	0.403162	3.76821e-05	0.475605	0.000284567	1.0005
116	0.316971	0.0884583	0.278512	228417190	9874427	0.771583	0.0414384	0.259415	0	0.329881	9.87443e-07	0.403184	2.21187e-05	0.475797	0.000192255	1.00003
117	0.313999	0.084388	0.26202	218920418	9496772	0.78108	0.0415764	0.259415	0	0.329881	4.27355e-07	0.403197	1.24883e-05	0.475924	0.000126924	1.00006
118	0.311108	0.0805409	0.246573	209790994	9129424	0.790209	0.041702	0.259415	0	0.329881	1.82588e-07	0.403204	6.80142e-06	0.476006	8.16171e-05	1.00009
119	0.308284	0.0769005	0.23244	201018507	8772487	0.798981	0.0418154	0.259415	0	0.329881	4.38624e-08	0.403207	3.50899e-06	0.476057	5.1012e-05	1.0001
120	0.305521	0.0734532	0.219275	192588776	8429731	0.807411	0.0419351	0.259415	0	0.329881	0	0.403209	1.72809e-06	0.476088	3.09371e-05	1.0005
