# Supplementary material for: Quantifying the Potential for Future Gene Therapy to Lower Lifetime Risk of Polygenic Late-Onset Diseases
Source: MDPI journal article supplement (doi:10.3390/ijms20133352), 2019-07-08
Supplement: s2 [file s2 › SuppFiles/Results/LODsCommonLow/CAD/1.000/IndividualsByBetaDistrib.csv]

nEntry	Beta	nDetrimentalCount	nFractionPopulation	nCumulativeFractionPopulation	nEditsNeeded	nIndividuals
0	-19.8	0	0	1	0	0
1	-19.6	0	0	1	0	0
2	-19.4	0	0	1	0	0
3	-19.2	0	0	1	0	0
4	-19	0	0	1	0	0
5	-18.8	0	0	1	0	0
6	-18.6	0	0	1	0	0
7	-18.4	0	0	1	0	0
8	-18.2	0	0	1	0	0
9	-18	0	0	1	0	0
10	-17.8	0	0	1	0	0
11	-17.6	0	0	1	0	0
12	-17.4	0	0	1	0	0
13	-17.2	0	0	1	0	0
14	-17	0	0	1	0	0
15	-16.8	0	0	1	0	0
16	-16.6	0	0	1	0	0
17	-16.4	0	0	1	0	0
18	-16.2	0	0	1	0	0
19	-16	0	0	1	0	0
20	-15.8	0	0	1	0	0
21	-15.6	0	0	1	0	0
22	-15.4	0	0	1	0	0
23	-15.2	0	0	1	0	0
24	-15	0	0	1	0	0
25	-14.8	0	0	1	0	0
26	-14.6	0	0	1	0	0
27	-14.4	0	0	1	0	0
28	-14.2	0	0	1	0	0
29	-14	0	0	1	0	0
30	-13.8	0	0	1	0	0
31	-13.6	0	0	1	0	0
32	-13.4	0	0	1	0	0
33	-13.2	0	0	1	0	0
34	-13	558	1e-09	1	0	1
35	-12.8	0	0	1	0	0
36	-12.6	0	0	1	0	0
37	-12.4	0	0	1	0	0
38	-12.2	0	0	1	0	0
39	-12	558	1e-09	1	0	1
40	-11.8	551.5	2e-09	1	0	2
41	-11.6	560.8	5e-09	1	0	5
42	-11.4	567.63	8e-09	0.99999999	0	8
43	-11.2	565.93	1.5e-08	0.99999998	0	15
44	-11	571.46	2.4e-08	0.99999997	0	24
45	-10.8	569.92	3.9e-08	0.99999994	0	39
46	-10.6	573.37	5.2e-08	0.99999991	0	52
47	-10.4	573.68	1.12e-07	0.99999985	0	112
48	-10.2	577.27	1.77e-07	0.99999974	0	177
49	-10	579.46	2.9e-07	0.99999956	0	290
50	-9.8	581.55	5.27e-07	0.99999927	0	527
51	-9.6	583.12	7.98e-07	0.99999875	0	798
52	-9.4	584.84	1.201e-06	0.99999795	0	1201
53	-9.2	586.65	1.813e-06	0.99999675	0	1813
54	-9	588.67	2.889e-06	0.99999494	0	2889
55	-8.8	590.64	4.545e-06	0.99999205	0	4545
56	-8.6	592.43	6.843e-06	0.9999875	0	6843
57	-8.4	594.31	1.0589e-05	0.99998066	0	10589
58	-8.2	596.29	1.5311e-05	0.99997007	0	15311
59	-8	598.16	2.2951e-05	0.99995476	0	22951
60	-7.8	600.1	3.3578e-05	0.99993181	0	33578
61	-7.6	601.96	4.8144e-05	0.99989823	0	48144
62	-7.4	603.89	6.9151e-05	0.99985009	0	69151
63	-7.2	605.79	9.7074e-05	0.99978093	0	97074
64	-7	607.66	0.000136003	0.99968386	0	136003
65	-6.8	609.57	0.000188255	0.99954786	0	188255
66	-6.6	611.46	0.000259171	0.9993596	0	259171
67	-6.4	613.37	0.000350756	0.99910043	0	350756
68	-6.2	615.26	0.000473386	0.99874968	0	473386
69	-6	617.17	0.00063131	0.99827629	0	631310
70	-5.8	619.07	0.000834219	0.99764498	0	834219
71	-5.6	620.96	0.001088256	0.99681076	0	1088256
72	-5.4	622.85	0.001407386	0.9957225	0	1407386
73	-5.2	624.76	0.001805541	0.99431512	0	1805541
74	-5	626.66	0.002291071	0.99250958	0	2291071
75	-4.8	628.56	0.002876342	0.99021851	0	2876342
76	-4.6	630.45	0.003580459	0.98734216	0	3580459
77	-4.4	632.34	0.004409926	0.98376171	0	4409926
78	-4.2	634.24	0.005381938	0.97935178	0	5381938
79	-4	636.14	0.006502561	0.97396984	0	6502561
80	-3.8	638.04	0.007784458	0.96746728	0	7784458
81	-3.6	639.93	0.009229506	0.95968282	0	9229506
82	-3.4	641.82	0.010828576	0.95045332	0	10828576
83	-3.2	643.72	0.012591337	0.93962474	0	12591337
84	-3	645.61	0.014504033	0.9270334	0	14504033
85	-2.8	647.51	0.016540272	0.91252937	0	16540272
86	-2.6	649.4	0.018688771	0.8959891	0	18688771
87	-2.4	651.3	0.020911946	0.87730033	0	20911946
88	-2.2	653.19	0.023176501	0.85638838	0	23176501
89	-2	655.08	0.02544474	0.83321188	0	25444740
90	-1.8	656.98	0.027666984	0.80776714	0	27666984
91	-1.6	658.87	0.029809083	0.78010016	0	29809083
92	-1.4	660.76	0.031815101	0.75029107	0	31815101
93	-1.2	662.65	0.033619048	0.71847597	0	33619048
94	-1	664.54	0.035214728	0.68485692	0	35214728
95	-0.8	666.44	0.036534213	0.6496422	0	36534213
96	-0.6	668.32	0.037524742	0.61310798	0	37524742
97	-0.4	670.22	0.038216155	0.57558324	0	38216155
98	-0.2	672.11	0.03854184	0.53736709	0	38541840
99	0	674	0.038496649	0.49882525	0	38496649
100	0.2	675.89	0.038114653	0.4603286	1.8917	38114653
101	0.4	677.78	0.037374259	0.42221394	3.781	37374259
102	0.6	679.67	0.036309136	0.38483968	5.6704	36309136
103	0.8	681.56	0.034960687	0.34853055	7.5617	34960687
104	1	683.45	0.033342596	0.31356986	9.4491	33342596
105	1.2	685.33	0.031511041	0.28022727	11.338	31511041
106	1.4	687.22	0.029497629	0.24871623	13.227	29497629
107	1.6	689.11	0.027361101	0.2192186	15.115	27361101
108	1.8	691	0.025152603	0.19185749	17.006	25152603
109	2	692.89	0.022904642	0.16670489	18.892	22904642
110	2.2	694.78	0.020668568	0.14380025	20.782	20668568
111	2.4	696.66	0.018473133	0.12313168	22.667	18473133
112	2.6	698.55	0.016380408	0.10465855	24.556	16380408
113	2.8	700.44	0.014381119	0.088278141	26.441	14381119
114	3	702.33	0.012512755	0.073897022	28.332	12512755
115	3.2	704.21	0.010787929	0.061384267	30.215	10787929
116	3.4	706.1	0.009217995	0.050596338	32.107	9217995
117	3.6	707.99	0.00780556	0.041378343	33.989	7805560
118	3.8	709.87	0.006544549	0.033572783	35.877	6544549
119	4	711.76	0.005442884	0.027028234	37.766	5442884
120	4.2	713.65	0.004480868	0.02158535	39.649	4480868
121	4.4	715.53	0.003660753	0.017104482	41.538	3660753
122	4.6	717.42	0.002962306	0.013443729	43.422	2962306
123	4.8	719.3	0.002374533	0.010481423	45.304	2374533
124	5	721.19	0.001891332	0.00810689	47.192	1891332
125	5.2	723.08	0.001485044	0.006215558	49.081	1485044
126	5.4	724.96	0.001160237	0.004730514	50.964	1160237
127	5.6	726.84	0.000898958	0.003570277	52.845	898958
128	5.8	728.74	0.000687409	0.002671319	54.738	687409
129	6	730.62	0.000523999	0.00198391	56.619	523999
130	6.2	732.5	0.000394556	0.001459911	58.5	394556
131	6.4	734.39	0.000294031	0.001065355	60.392	294031
132	6.6	736.23	0.000217039	0.000771324	62.234	217039
133	6.8	738.15	0.000159499	0.000554285	64.157	159499
134	7	740.04	0.000115312	0.000394786	66.046	115312
135	7.2	741.91	8.3607e-05	0.000279474	67.913	83607
136	7.4	743.82	5.9964e-05	0.000195867	69.825	59964
137	7.6	745.66	4.2142e-05	0.000135903	71.667	42142
138	7.8	747.54	2.9903e-05	9.3761e-05	73.541	29903
139	8	749.52	2.0526e-05	6.3858e-05	75.521	20526
140	8.2	751.34	1.4106e-05	4.3332e-05	77.344	14106
141	8.4	753.2	9.704e-06	2.9226e-05	79.204	9704
142	8.6	755.06	6.618e-06	1.9522e-05	81.065	6618
143	8.8	757.04	4.371e-06	1.2904e-05	83.046	4371
144	9	758.87	2.986e-06	8.533e-06	84.878	2986
145	9.2	760.94	2.002e-06	5.547e-06	86.938	2002
146	9.4	762.55	1.271e-06	3.545e-06	88.552	1271
147	9.6	764.57	8.16e-07	2.274e-06	90.578	816
148	9.8	766.16	5.86e-07	1.458e-06	92.161	586
149	10	768.62	3.26e-07	8.72e-07	94.622	326
150	10.2	770.16	2.17e-07	5.46e-07	96.159	217
151	10.4	770.97	1.17e-07	3.29e-07	96.969	117
152	10.6	773.85	9.3e-08	2.12e-07	99.852	93
153	10.8	776.53	3.6e-08	1.19e-07	102.53	36
154	11	777.94	3.3e-08	8.3e-08	103.94	33
155	11.2	779.75	2e-08	5e-08	105.75	20
156	11.4	781.08	1.2e-08	3e-08	107.09	12
157	11.6	786.4	1e-08	1.8e-08	112.4	10
158	11.8	784.5	2e-09	8e-09	110.5	2
159	12	781.5	2e-09	6e-09	107.5	2
160	12.2	785	1e-09	4e-09	111	1
161	12.4	797	1e-09	3e-09	123	1
162	12.6	0	0	2e-09	0	0
163	12.8	796	1e-09	2e-09	122	1
164	13	0	0	1e-09	0	0
165	13.2	0	0	1e-09	0	0
166	13.4	0	0	1e-09	0	0
167	13.6	800	1e-09	1e-09	126	1
168	13.8	0	0	0	0	0
169	14	0	0	0	0	0
170	14.2	0	0	0	0	0
171	14.4	0	0	0	0	0
172	14.6	0	0	0	0	0
173	14.8	0	0	0	0	0
174	15	0	0	0	0	0
175	15.2	0	0	0	0	0
176	15.4	0	0	0	0	0
177	15.6	0	0	0	0	0
178	15.8	0	0	0	0	0
179	16	0	0	0	0	0
180	16.2	0	0	0	0	0
181	16.4	0	0	0	0	0
182	16.6	0	0	0	0	0
183	16.8	0	0	0	0	0
184	17	0	0	0	0	0
185	17.2	0	0	0	0	0
186	17.4	0	0	0	0	0
187	17.6	0	0	0	0	0
188	17.8	0	0	0	0	0
189	18	0	0	0	0	0
190	18.2	0	0	0	0	0
191	18.4	0	0	0	0	0
192	18.6	0	0	0	0	0
193	18.8	0	0	0	0	0
194	19	0	0	0	0	0
195	19.2	0	0	0	0	0
196	19.4	0	0	0	0	0
197	19.6	0	0	0	0	0
198	19.8	0	0	0	0	0
199	20	0	0	0	0	0
