# Supplementary material for: Quantifying the Potential for Future Gene Therapy to Lower Lifetime Risk of Polygenic Late-Onset Diseases
Source: MDPI journal article supplement (doi:10.3390/ijms20133352), 2019-07-08
Supplement: s2 [file s2 › SuppFiles/Results/LODsCommonLow/CAD/1.000/ScatterData.csv]

Age	OR	Beta
37	12.405	2.5181
39	49.345	3.8988
39	18.459	2.9155
40	3.4124	1.2274
40	6.3271	1.8448
40	34.702	3.5468
40	35.762	3.5769
40	81.063	4.3952
40	606.56	6.4078
41	22.904	3.1313
41	9.6669	2.2687
42	250.15	5.5221
42	166.94	5.1177
42	3.1806	1.1571
42	31.26	3.4423
43	3.2749	1.1863
43	638.77	6.4595
43	12.786	2.5483
43	17.463	2.8601
43	3.9391	1.371
43	84.009	4.4309
43	62.999	4.1431
43	852.71	6.7484
43	38.961	3.6626
43	3.6664	1.2992
43	150.12	5.0114
44	252.06	5.5297
44	54.541	3.999
44	234.04	5.4555
44	17.939	2.887
44	163.87	5.099
44	78.6	4.3644
44	124.16	4.8216
44	264.18	5.5766
44	35.197	3.561
44	95.436	4.5585
45	50.154	3.9151
45	31.321	3.4443
45	9.388	2.2394
45	7.978	2.0767
45	667.4	6.5034
45	59.849	4.0918
45	10.774	2.3771
45	27.377	3.3097
45	274.63	5.6154
46	1.9141	0.64926
46	4.6576	1.5385
46	9.9041	2.2929
46	8.9101	2.1872
46	44.085	3.7861
46	40.348	3.6975
46	221.92	5.4023
47	2.5143	0.92199
47	217.88	5.3839
47	1.1181	0.11163
47	79.895	4.3807
47	75.754	4.3275
47	127.12	4.8451
47	48.199	3.8753
47	1.373	0.31698
47	1.8052	0.59066
47	11.515	2.4436
48	331.95	5.805
48	8.1966	2.1037
48	173.98	5.1589
48	153.92	5.0364
49	0.69648	-0.36171
49	1.6523	0.50218
49	39.941	3.6874
49	72.608	4.2851
49	17.228	2.8466
49	10.518	2.3531
49	2.8289	1.0399
49	14.043	2.6421
49	4.3565	1.4717
49	1.8851	0.634
49	370.6	5.9151
50	0.53249	-0.63019
50	124.2	4.8219
50	53.969	3.9884
50	0.39185	-0.93687
50	9.4818	2.2494
50	26.894	3.2919
50	8.4146	2.13
50	24.233	3.1877
50	1.5414	0.4327
50	75.665	4.3263
50	38.835	3.6593
50	184.38	5.217
50	8.1376	2.0965
50	75.597	4.3254
50	49.418	3.9003
50	110.68	4.7066
50	5.8404	1.7648
50	283.98	5.6489
51	65.207	4.1776
51	188.92	5.2413
51	81.682	4.4028
51	382	5.9454
51	134.02	4.898
51	178.02	5.1819
51	48.583	3.8833
51	18.26	2.9047
51	54.814	4.0039
51	2.0908	0.73752
51	49.464	3.9013
51	96.504	4.5696
51	12.756	2.546
51	221.94	5.4024
51	60.657	4.1052
51	0.6565	-0.42084
51	0.67012	-0.40031
51	114.69	4.7422
51	11.289	2.4238
52	154.1	5.0376
52	35.515	3.57
52	7.0107	1.9474
52	115.94	4.7531
52	4.022	1.3918
52	1.6812	0.51951
52	44.896	3.8044
52	130.13	4.8685
52	498.33	6.2113
52	0.96541	-0.0352
52	135.2	4.9068
52	248.38	5.515
52	146.52	4.9871
53	0.71334	-0.3378
53	11.444	2.4375
53	60.309	4.0995
53	507.64	6.2298
53	296.96	5.6936
53	35.089	3.5579
53	3.5774	1.2746
53	223.86	5.411
53	72.788	4.2875
53	194.65	5.2712
53	89.749	4.497
53	42.446	3.7482
53	87.786	4.4749
53	51.658	3.9446
53	10.837	2.383
53	358.84	5.8829
53	14.591	2.6804
53	30.795	3.4274
53	38.803	3.6585
53	28.944	3.3654
53	147.32	4.9926
53	4576.4	8.4287
53	25.9	3.2543
54	900.56	6.803
54	1109.8	7.012
54	18.99	2.9439
54	104.81	4.6521
54	38.329	3.6462
54	5.5053	1.7057
54	45.948	3.8275
54	114.09	4.737
54	73.008	4.2906
54	18.415	2.9132
54	201.96	5.3081
54	21.924	3.0876
54	84.314	4.4345
54	76.342	4.3352
54	20.824	3.0361
54	89.669	4.4961
54	27.627	3.3188
55	61.476	4.1187
55	3.3333	1.204
55	25.774	3.2494
55	12.168	2.4988
55	1.2778	0.24513
55	48.174	3.8748
55	203.47	5.3155
55	100.08	4.606
55	28.054	3.3341
55	29.479	3.3837
55	34.848	3.551
55	28.581	3.3527
55	187.27	5.2325
55	7.0231	1.9492
55	3.6151	1.2851
55	225.37	5.4177
55	15.026	2.7098
55	9.7291	2.2751
55	1.5078	0.41065
55	117.63	4.7676
55	166.76	5.1166
55	7.0035	1.9464
55	29.395	3.3808
55	24.691	3.2064
55	1.7924	0.58353
56	72.597	4.2849
56	3.6072	1.2829
56	149.38	5.0065
56	10.155	2.318
56	285.39	5.6539
56	92.579	4.5281
56	2.7202	1.0007
56	1.8561	0.61845
56	15.377	2.7329
56	4.913	1.5919
56	12.891	2.5565
56	14.946	2.7045
56	9.6837	2.2704
56	104.44	4.6486
56	34.792	3.5494
56	6.2307	1.8295
56	70.741	4.259
56	7.1356	1.9651
56	29.52	3.3851
57	46.545	3.8404
57	4.1589	1.4253
57	17.244	2.8475
57	9.0278	2.2003
57	24.788	3.2103
57	12.608	2.5344
57	9.3804	2.2386
57	71.946	4.2759
57	202	5.3083
57	8.4	2.1282
57	42.183	3.742
57	5.1136	1.6319
57	6.2473	1.8321
57	47.348	3.8575
57	7.5841	2.0261
57	18.215	2.9022
57	81.689	4.4029
57	82.379	4.4113
57	7.885	2.065
57	55.283	4.0125
57	36.029	3.5843
57	5.8764	1.7709
57	360.42	5.8873
57	124.68	4.8257
57	0.82429	-0.19323
57	5.4428	1.6943
57	3.5154	1.2571
57	8.8793	2.1837
57	7.4893	2.0135
57	1.4414	0.3656
57	2.4841	0.90992
57	39.792	3.6837
58	0.50627	-0.68069
58	287.59	5.6615
58	33.193	3.5024
58	4.2279	1.4417
58	9.2603	2.2257
58	50.012	3.9123
58	120.54	4.7919
58	23.692	3.1651
58	17.038	2.8354
58	47.733	3.8656
58	11.43	2.4362
58	12.131	2.4957
58	3.3918	1.2214
58	241.11	5.4853
58	17.914	2.8856
58	370.29	5.9143
58	27.555	3.3162
58	43.862	3.781
58	22.695	3.1221
58	10.461	2.3477
58	85.611	4.4498
58	4.1881	1.4322
58	7.3366	1.9929
58	9.7003	2.2722
58	16.117	2.7799
58	7.7801	2.0516
58	10.479	2.3493
58	622.34	6.4335
58	0.92313	-0.079988
59	6.305	1.8413
59	31.524	3.4508
59	3.7176	1.3131
59	65.904	4.1882
59	22.375	3.108
59	53.412	3.978
59	0.84294	-0.17086
59	2.0563	0.72092
59	1.7484	0.55868
59	4.2471	1.4462
59	64.263	4.163
59	29.594	3.3876
59	2.5504	0.93625
59	21.674	3.0761
59	8.732	2.167
59	47.997	3.8711
59	3.7618	1.3249
59	10.076	2.3102
59	18.798	2.9338
59	35.181	3.5605
59	10.645	2.3651
59	15.781	2.7588
59	8.9808	2.1951
59	51.365	3.939
59	8.9631	2.1931
59	7.6816	2.0388
60	11.775	2.466
60	109.1	4.6922
60	168.14	5.1248
60	52.934	3.969
60	3.2391	1.1753
60	5.6382	1.7296
60	1.395	0.33291
60	60.383	4.1007
60	28.642	3.3549
60	63.003	4.1432
60	5.7022	1.7409
60	1.3127	0.27208
60	89.831	4.4979
60	63.749	4.1549
60	166.55	5.1153
60	162.4	5.0901
60	202.44	5.3104
60	6.4288	1.8608
60	34.279	3.5345
60	22.4	3.109
60	51.248	3.9367
60	23.811	3.1701
60	80.453	4.3877
60	39.551	3.6776
60	883.56	6.784
60	8.0781	2.0892
60	242.92	5.4927
60	34.759	3.5484
61	5.6114	1.7248
61	147.25	4.9921
61	42.402	3.7472
61	88.771	4.4861
61	14.912	2.7022
61	16.49	2.8028
61	280.98	5.6383
61	35.927	3.5815
61	1.4049	0.33995
61	119.79	4.7858
61	2.6137	0.96078
61	9.2402	2.2236
61	3.4039	1.2249
61	11.573	2.4486
61	12.753	2.5457
61	123.23	4.814
61	146.59	4.9876
61	144.44	4.9729
61	12.119	2.4948
61	23.546	3.159
61	38.454	3.6495
61	567.39	6.341
61	27.968	3.3311
61	0.9209	-0.082401
61	41.468	3.7249
61	11.685	2.4583
61	131.5	4.879
61	1.754	0.56188
61	23.744	3.1673
61	121.77	4.8021
61	242.82	5.4923
61	77.857	4.3549
61	0.2138	-1.5427
61	4.2087	1.4371
61	74.946	4.3168
61	37.607	3.6272
61	6.329	1.8451
61	29.528	3.3853
61	24.962	3.2174
61	5.4456	1.6948
62	67.9	4.218
62	42.437	3.748
62	30.188	3.4074
62	2.4304	0.88805
62	176.01	5.1705
62	14.12	2.6476
62	0.26885	-1.3136
62	14.709	2.6885
62	228.05	5.4296
62	7.0606	1.9545
62	30.857	3.4294
62	3.4698	1.2441
62	44.589	3.7975
62	21.018	3.0454
62	34.314	3.5356
62	78.66	4.3651
62	25.357	3.2331
62	9.1481	2.2135
62	6.1735	1.8203
62	45.998	3.8286
62	9.6867	2.2708
62	10.846	2.3838
62	11.214	2.4172
62	8.1954	2.1036
62	12.123	2.4951
62	358.03	5.8806
62	71.324	4.2672
63	2.376	0.86544
63	0.50848	-0.67632
63	36.416	3.595
63	12.973	2.5629
63	0.98463	-0.015488
63	101.53	4.6203
63	12.489	2.5249
63	18.442	2.9147
63	30.924	3.4315
63	79.046	4.37
63	87.479	4.4714
63	290.42	5.6713
63	179.27	5.1889
63	6.6889	1.9004
63	2.8766	1.0566
63	180.53	5.1959
63	207.38	5.3345
63	18.971	2.9429
63	25.66	3.2449
63	44.812	3.8025
63	54.097	3.9908
63	2.3074	0.83612
63	7.4439	2.0074
63	43.665	3.7765
63	21.523	3.0691
63	3.0207	1.1055
63	8.6526	2.1579
63	507.52	6.2295
63	12.757	2.5461
63	16.886	2.8265
63	5.9772	1.7879
63	38.791	3.6582
63	1.5481	0.43704
63	13.398	2.5951
63	5.0881	1.6269
63	2.521	0.92467
63	16.655	2.8127
63	0.97142	-0.028998
63	64.358	4.1645
63	33.211	3.5029
63	94.436	4.5479
64	714.8	6.572
64	79.524	4.3761
64	1.755	0.56248
64	3.1764	1.1558
64	62.218	4.1307
64	142.32	4.9581
64	3.7542	1.3229
64	65.893	4.188
64	35.829	3.5788
64	5.5065	1.7059
64	12.813	2.5505
64	1.5502	0.43837
64	1.0231	0.022879
64	3.4404	1.2356
64	11.566	2.4481
64	15.763	2.7577
64	0.74784	-0.29056
64	45.337	3.8141
64	14.935	2.7037
64	11.921	2.4783
64	12.864	2.5545
64	64.188	4.1618
64	6.2217	1.828
64	109.93	4.6999
64	25.74	3.2481
64	5.5519	1.7141
64	1.537	0.42986
64	37.023	3.6115
64	5.6226	1.7268
64	127.9	4.8513
64	70.961	4.2621
64	14.261	2.6575
64	2.2196	0.79731
64	15.6	2.7473
64	37.729	3.6304
64	16.122	2.7802
64	22.429	3.1103
64	2.7004	0.9934
64	59.597	4.0876
64	0.84287	-0.17094
64	39.089	3.6658
64	8.8295	2.1781
65	148.97	5.0038
65	1.0919	0.087917
65	31.256	3.4422
65	1.2888	0.25373
65	92.221	4.5242
65	3.7926	1.333
65	12.04	2.4883
65	46.937	3.8488
65	22.018	3.0919
65	46.806	3.846
65	63.714	4.1544
65	44.376	3.7927
65	3.3967	1.2228
65	31.706	3.4565
65	41.781	3.7324
65	3.3034	1.195
65	33.484	3.5111
65	16.257	2.7885
65	72.254	4.2802
65	71.924	4.2756
65	54.416	3.9967
65	110.05	4.701
65	7.8175	2.0564
65	23.668	3.1641
65	3.4056	1.2254
65	3.5017	1.2533
65	31.509	3.4503
65	186.47	5.2283
65	17.456	2.8597
65	183.72	5.2134
65	32.736	3.4885
65	29.287	3.3771
65	121.39	4.799
65	4.4656	1.4964
65	13.621	2.6116
65	47.728	3.8655
65	9.7562	2.2779
65	37.829	3.6331
65	59.649	4.0885
65	3.6158	1.2853
65	16.956	2.8306
65	20.374	3.0143
65	22.118	3.0964
65	230.75	5.4414
65	42.822	3.7571
66	10.584	2.3593
66	19.227	2.9563
66	28.252	3.3412
66	0.66053	-0.41472
66	1.7686	0.57017
66	6.6927	1.901
66	11.936	2.4796
66	136.55	4.9167
66	3.1061	1.1334
66	3.9676	1.3782
66	114.88	4.7439
66	290.02	5.6699
66	168.62	5.1277
66	2.6636	0.97966
66	33.244	3.5039
66	3.1818	1.1574
66	22.862	3.1295
66	76.483	4.3371
66	10.151	2.3176
66	11.558	2.4474
66	10.792	2.3788
66	25.655	3.2447
66	1.7979	0.58664
66	6.5242	1.8755
66	7.5981	2.0279
66	3.0794	1.1247
66	1.0485	0.047407
66	3.0583	1.1178
66	57.585	4.0533
66	10.328	2.3348
66	14.232	2.6555
66	4.2004	1.4352
66	0.92265	-0.080502
66	107.05	4.6733
66	12.823	2.5513
66	25.052	3.221
66	10.939	2.3924
66	15.259	2.7251
66	14.931	2.7034
66	72.9	4.2891
66	65.815	4.1868
66	4.2078	1.4369
66	17.604	2.8681
66	3.4748	1.2455
66	20.357	3.0134
66	10.897	2.3885
66	26.804	3.2885
66	38.083	3.6398
66	5.163	1.6415
66	12.165	2.4986
66	45.8	3.8243
66	19.788	2.9851
66	3.996	1.3853
66	22.824	3.1278
66	1.8653	0.62343
66	1.3382	0.29131
66	22.742	3.1242
66	5.1384	1.6367
66	92.444	4.5266
66	3.9428	1.3719
66	34.936	3.5535
66	15.674	2.752
67	46.284	3.8348
67	39.092	3.6659
67	70.755	4.2592
67	38.696	3.6557
67	0.82314	-0.19463
67	23.893	3.1736
67	1.5929	0.46558
67	4.1892	1.4325
67	13.266	2.5852
67	26.325	3.2705
67	56.82	4.0399
67	77.908	4.3555
67	4.2305	1.4423
67	26.725	3.2856
67	3.2773	1.187
67	0.40867	-0.89486
67	22.266	3.1031
67	33.182	3.502
67	0.13308	-2.0168
67	3.7511	1.322
67	10.222	2.3245
67	18.472	2.9163
67	2.7329	1.0054
67	27.314	3.3074
67	4.8257	1.574
67	15.415	2.7353
67	22.75	3.1246
67	21.725	3.0785
67	12.35	2.5137
67	3.179	1.1566
67	54.251	3.9936
67	144.56	4.9737
67	3.5754	1.2741
67	77.407	4.3491
67	10.092	2.3117
67	83.415	4.4238
67	4.6976	1.547
67	17.431	2.8583
67	16.3	2.7912
67	7.7891	2.0527
67	45.13	3.8096
67	18.361	2.9102
67	6.0762	1.8044
67	2.2796	0.824
67	142.11	4.9566
67	6.8118	1.9186
67	49.1	3.8939
67	26.746	3.2864
67	142.38	4.9585
67	11.398	2.4335
68	10.703	2.3705
68	40.198	3.6938
68	188.04	5.2366
68	149.15	5.0049
68	66.617	4.199
68	0.46896	-0.75723
68	53.98	3.9886
68	10.843	2.3835
68	23.377	3.1517
68	3.3785	1.2174
68	51.041	3.9326
68	12.822	2.5511
68	8.0557	2.0864
68	12.866	2.5546
68	11.913	2.4777
68	14.618	2.6822
68	1.886	0.63443
68	36.799	3.6055
68	0.81114	-0.20932
68	20.255	3.0084
68	43.169	3.7651
68	25.726	3.2475
68	16.191	2.7844
68	9.6748	2.2695
68	19.327	2.9615
68	8.5096	2.1412
68	9.1894	2.2181
68	4.3897	1.4793
68	36.661	3.6017
68	2.5255	0.92643
68	37.285	3.6186
68	2.1558	0.76815
68	1.4781	0.39079
68	0.90301	-0.10202
68	4.2045	1.4362
68	22.214	3.1007
68	13.27	2.5855
68	21.695	3.0771
68	19.84	2.9877
68	6.5578	1.8807
68	15.928	2.7681
68	3.139	1.1439
68	4.2428	1.4452
68	9.119	2.2104
68	98.361	4.5886
68	9.3911	2.2398
68	3.5959	1.2798
68	2.1301	0.75617
68	10.204	2.3228
68	21.885	3.0858
68	4.6564	1.5382
68	9.3314	2.2334
68	1.6915	0.52561
68	43.953	3.7831
68	3.7971	1.3342
68	2.1726	0.7759
68	15.29	2.7272
68	23.57	3.16
68	10.639	2.3646
68	47.204	3.8545
68	28.482	3.3493
68	26.37	3.2722
68	59.576	4.0873
68	87.733	4.4743
68	18.456	2.9154
69	38.244	3.644
69	27.336	3.3082
69	29.418	3.3816
69	4.4524	1.4934
69	28.781	3.3597
69	9.0122	2.1986
69	10.615	2.3622
69	3.8252	1.3416
69	7.176	1.9707
69	1.5854	0.46084
69	98.245	4.5875
69	7.8317	2.0582
69	13.021	2.5666
69	41.369	3.7225
69	0.65581	-0.42189
69	7.4536	2.0087
69	11.045	2.402
69	10.721	2.3722
69	41.181	3.718
69	1.1793	0.1649
69	21.075	3.0481
69	57.383	4.0497
69	2.3076	0.83621
69	10.462	2.3478
69	10.315	2.3336
69	8.8185	2.1769
69	21.846	3.084
69	11.649	2.4552
69	1.6377	0.49328
69	2.6269	0.96579
69	3.5444	1.2654
69	61.544	4.1198
69	265.1	5.5801
69	8.6713	2.16
69	15.468	2.7388
69	25.923	3.2551
69	99.41	4.5993
69	2.3792	0.86676
69	31.942	3.4639
69	103.23	4.637
69	4.0356	1.3952
69	34.104	3.5294
69	18.983	2.9436
69	1.7522	0.5609
69	22.867	3.1297
69	13.64	2.613
69	14.809	2.6952
69	21.403	3.0635
69	7.1933	1.9732
69	5.9835	1.789
69	36.854	3.607
69	1.3072	0.26792
69	14.614	2.682
69	2.521	0.92464
69	4.6343	1.5335
69	8.8495	2.1804
69	26.86	3.2906
70	3.4699	1.2441
70	3.7481	1.3213
70	22.061	3.0938
70	10.093	2.3119
70	249.3	5.5187
70	7.3331	1.9924
70	20.801	3.035
70	4.6513	1.5372
70	3.0844	1.1264
70	1.9583	0.6721
70	2.5543	0.93777
70	0.81814	-0.20073
70	20.121	3.0018
70	6.2258	1.8287
70	30.21	3.4082
70	2.5697	0.94379
70	0.79623	-0.22787
70	15.322	2.7293
70	29.187	3.3737
70	4.8142	1.5716
70	7.747	2.0473
70	10.117	2.3142
70	80.571	4.3891
70	9.2746	2.2273
70	7.8489	2.0604
70	15.213	2.7222
70	14.881	2.7001
70	4.9601	1.6014
70	4.4338	1.4893
70	5.5118	1.7069
70	7.243	1.98
70	8.3589	2.1233
70	25.399	3.2347
70	14.11	2.6469
70	0.58451	-0.53698
70	8.9822	2.1952
70	13.864	2.6293
70	23.465	3.1555
70	13.533	2.6052
70	0.97284	-0.027541
70	37.264	3.618
70	40.521	3.7018
70	119.55	4.7838
70	25.377	3.2338
70	23.303	3.1486
70	51.521	3.942
70	51.51	3.9418
70	7.5008	2.015
70	9.1512	2.2139
70	7.9438	2.0724
70	10.824	2.3817
70	70.115	4.2501
70	11.213	2.417
70	59.415	4.0845
70	1.8246	0.60137
70	67.559	4.213
70	16.062	2.7765
70	8.3039	2.1167
70	1.9191	0.65187
70	4.5593	1.5172
70	31.255	3.4422
70	3.8348	1.3441
70	5.5113	1.7068
70	11.384	2.4323
70	35.904	3.5808
70	11.809	2.4689
71	7.449	2.0081
71	33.443	3.5098
71	103.55	4.6401
71	3.7529	1.3225
71	0.42017	-0.86711
71	1.4406	0.36505
71	13.513	2.6037
71	6.4344	1.8617
71	4.0076	1.3882
71	54.824	4.0041
71	17.351	2.8536
71	49.563	3.9033
71	3.7711	1.3274
71	2.8367	1.0426
71	10.494	2.3508
71	18.537	2.9198
71	8.0762	2.0889
71	15.258	2.7251
71	35.256	3.5626
71	3.8114	1.338
71	1.9728	0.67943
71	0.6307	-0.46092
71	2.0888	0.73658
71	6.0488	1.7999
71	2.5831	0.94899
71	21.211	3.0545
71	0.49089	-0.71154
71	3.5052	1.2542
71	88.933	4.4879
71	16.619	2.8106
71	14.503	2.6744
71	100.72	4.6123
71	10.357	2.3377
71	3.9889	1.3835
71	7.5199	2.0176
71	0.057646	-2.8534
71	6.7695	1.9124
71	53.916	3.9874
71	1.6736	0.51496
71	2.2427	0.80766
71	2.5817	0.94843
71	48.563	3.8829
71	0.5415	-0.61341
71	4.0767	1.4053
71	5.8654	1.7691
71	8.5978	2.1515
71	0.79441	-0.23016
71	28.733	3.3581
71	4.8774	1.5846
71	32.841	3.4917
71	4.1598	1.4255
71	2.3143	0.83911
71	10.8	2.3795
71	77.998	4.3567
71	23.281	3.1476
71	1.3613	0.3084
71	5.0162	1.6127
71	2.9631	1.0862
71	30.577	3.4202
71	3.1995	1.163
71	9.4003	2.2407
71	14.24	2.6561
71	2.8031	1.0307
71	12.274	2.5075
71	4.0194	1.3911
71	5.1067	1.6306
71	52.336	3.9577
71	0.60352	-0.50498
71	21.245	3.0561
71	18.369	2.9107
71	21.325	3.0599
71	76.53	4.3377
71	22.225	3.1012
71	0.15251	-1.8805
71	3.8521	1.3486
72	6.5588	1.8808
72	12.561	2.5306
72	2.8787	1.0573
72	3.6587	1.2971
72	8.5059	2.1408
72	7.7299	2.0451
72	4.6253	1.5315
72	7.2698	1.9837
72	36.683	3.6023
72	1.3388	0.29179
72	7.846	2.06
72	17.146	2.8417
72	10.486	2.35
72	25.969	3.2569
72	5.2977	1.6673
72	4.1595	1.4254
72	0.7169	-0.33282
72	8.104	2.0924
72	28.346	3.3445
72	21.009	3.0449
72	10.181	2.3205
72	12.082	2.4917
72	18.472	2.9162
72	1.4612	0.37928
72	1.291	0.25541
72	0.86358	-0.14667
72	2.0397	0.71281
72	12.258	2.5061
72	4.5129	1.507
72	10.1	2.3125
72	59.884	4.0924
72	21.304	3.0589
72	16.009	2.7732
72	10.445	2.3462
72	23.886	3.1733
72	20.115	3.0015
72	76.992	4.3437
72	15.571	2.7454
72	29.213	3.3746
72	66.745	4.2009
72	32.807	3.4907
72	0.92867	-0.074
72	43.706	3.7775
72	1.4951	0.40218
72	0.16614	-1.795
72	24.952	3.217
72	4.4701	1.4974
72	4.4428	1.4913
72	44.638	3.7986
72	3.8913	1.3587
72	7.0571	1.954
72	2.792	1.0267
72	14.765	2.6923
72	24.144	3.184
72	1.4435	0.36705
72	23.275	3.1474
72	3.4886	1.2495
72	2.8999	1.0647
72	38.437	3.649
72	9.5886	2.2606
72	96.796	4.5726
72	25.008	3.2192
72	29.196	3.374
73	2.7772	1.0215
73	6.6576	1.8958
73	16.684	2.8144
73	0.22601	-1.4872
73	8.3819	2.1261
73	15.288	2.7271
73	6.7037	1.9027
73	97.59	4.5808
73	13.867	2.6295
73	20.37	3.0141
73	9.0675	2.2047
73	3.2937	1.192
73	18.685	2.9277
73	3.8104	1.3377
73	3.1877	1.1593
73	8.8657	2.1822
73	76.928	4.3429
73	7.2675	1.9834
73	1.7783	0.57568
73	5.1533	1.6396
73	15.678	2.7522
73	46.247	3.834
73	11.016	2.3994
73	18.61	2.9237
73	3.4444	1.2367
73	8.7479	2.1688
73	18.278	2.9057
73	12.765	2.5467
73	1.1095	0.10395
73	23.553	3.1593
73	17.178	2.8436
73	4.552	1.5156
73	5.2078	1.6502
73	32.087	3.4685
73	2.6265	0.96564
73	11.517	2.4438
73	11.814	2.4693
73	2.551	0.93648
73	17.134	2.841
73	74.188	4.3066
73	4.557	1.5167
73	4.2224	1.4404
73	0.97803	-0.022212
73	2.3338	0.8475
73	0.73093	-0.31344
73	5.796	1.7572
73	30.659	3.4229
73	3.9809	1.3815
73	2.3145	0.83918
73	8.1787	2.1015
73	9.1756	2.2166
73	4.2847	1.455
73	2.4394	0.89175
73	10.652	2.3657
73	1.2241	0.20222
73	2.4781	0.9075
73	14.936	2.7038
73	35.76	3.5768
73	4.7894	1.5664
73	1.1137	0.10771
73	19.523	2.9716
73	28.047	3.3339
73	3.7267	1.3155
73	5.3528	1.6776
73	15.272	2.726
73	0.1951	-1.6342
73	1.057	0.055468
73	5.4413	1.694
73	14.42	2.6686
73	12.691	2.5409
73	5.7773	1.7539
73	10.915	2.3902
73	9.0877	2.2069
73	6.0915	1.8069
73	0.69641	-0.36182
74	11.636	2.4541
74	2.8445	1.0454
74	13.594	2.6096
74	1.7796	0.57638
74	161.72	5.0858
74	0.077916	-2.5521
74	7.4566	2.0091
74	6.9889	1.9443
74	44.093	3.7863
74	3.1905	1.1602
74	0.41761	-0.87321
74	0.11473	-2.1652
74	2.9306	1.0752
74	3.5293	1.2611
74	5.7876	1.7557
74	0.064716	-2.7377
74	3.0967	1.1304
74	14.011	2.6398
74	8.6579	2.1585
74	0.39736	-0.9229
74	1.6574	0.50522
74	22.104	3.0958
74	7.7144	2.0431
74	7.4518	2.0085
74	3.2854	1.1895
74	9.8525	2.2877
74	23.342	3.1503
74	7.4513	2.0084
74	4.2245	1.4409
74	47.064	3.8515
74	1.7517	0.56057
74	15.857	2.7636
74	4.8613	1.5813
74	14.132	2.6485
74	4.4333	1.4891
74	0.98704	-0.01304
74	13.125	2.5745
74	3.5062	1.2545
74	9.6675	2.2688
74	0.50621	-0.68081
74	8.3616	2.1236
74	2.0982	0.7411
74	4.8262	1.5741
74	2.9668	1.0875
74	19.829	2.9872
74	5.0189	1.6132
74	2.9122	1.0689
74	5.2531	1.6588
74	11.068	2.4041
74	33.65	3.516
74	101.45	4.6196
74	83.528	4.4252
74	2.6248	0.965
74	11.01	2.3988
74	2.6777	0.98495
74	23.494	3.1567
74	2.8148	1.0349
74	8.4771	2.1374
74	6.8382	1.9225
74	24.941	3.2165
74	3.8534	1.349
74	117.12	4.7632
74	2.9844	1.0934
74	11.579	2.4492
74	6.0282	1.7964
74	18.606	2.9235
74	2.0561	0.7208
74	3.1802	1.157
74	9.0848	2.2066
74	18.321	2.908
74	1.0539	0.052537
74	1.3276	0.28338
74	5.0896	1.6272
74	19.099	2.9496
74	5.2963	1.667
74	0.47614	-0.74204
74	24.325	3.1915
74	8.7345	2.1673
74	6.2169	1.8273
74	8.163	2.0996
74	15.493	2.7404
74	14.381	2.6659
75	26.902	3.2922
75	7.833	2.0583
75	10.269	2.3291
75	4.3795	1.4769
75	5.1124	1.6317
75	28.912	3.3643
75	0.1531	-1.8766
75	2.3436	0.85168
75	112.46	4.7226
75	10.911	2.3898
75	2.0539	0.71975
75	15.711	2.7544
75	90.091	4.5008
75	26.453	3.2754
75	17.696	2.8733
75	10.366	2.3385
75	5.851	1.7666
75	25.095	3.2227
75	2.7161	0.9992
75	0.56169	-0.5768
75	4.5667	1.5188
75	23.08	3.1389
75	6.5246	1.8756
75	2.871	1.0547
75	13.401	2.5953
75	6.6163	1.8895
75	61.008	4.111
75	2.1655	0.77266
75	6.5132	1.8738
75	49.462	3.9012
75	12.361	2.5145
75	1.6858	0.52227
75	16.766	2.8194
75	32.529	3.4821
75	206.92	5.3323
75	4.8729	1.5837
75	6.2729	1.8362
75	7.6919	2.0402
75	5.1492	1.6388
75	0.31546	-1.1537
75	3.4815	1.2475
75	10.609	2.3617
75	8.9133	2.1875
75	1.9402	0.66277
75	34.885	3.5521
75	30.037	3.4024
75	2.4191	0.88339
75	2.6556	0.97665
75	4.3154	1.4622
75	26.02	3.2589
75	1.7647	0.56796
75	17.315	2.8515
75	8.3968	2.1278
75	12.937	2.5601
75	5.0691	1.6232
75	1.3648	0.31101
75	49.539	3.9028
75	0.83419	-0.1813
75	22.545	3.1155
75	1.7948	0.58492
75	0.70039	-0.35612
75	8.7165	2.1652
75	3.0965	1.1303
75	66.85	4.2025
75	2.4377	0.89104
75	36.167	3.5881
75	24.815	3.2115
75	63.273	4.1475
75	1.0429	0.04202
75	18.654	2.9261
75	0.88331	-0.12408
75	0.62075	-0.47682
75	8.2383	2.1088
75	2.05	0.71783
75	0.064611	-2.7394
75	5.9629	1.7856
75	2.4708	0.90452
75	17.425	2.8579
75	9.4313	2.244
75	6.9729	1.942
75	1.9762	0.68117
76	8.1425	2.0971
76	9.8399	2.2864
76	4.9382	1.597
76	9.9374	2.2963
76	0.60194	-0.50759
76	4.6955	1.5466
76	13.533	2.6051
76	32.841	3.4917
76	11.761	2.4648
76	33.777	3.5198
76	1.2064	0.18765
76	11.006	2.3984
76	4.6773	1.5427
76	1.6019	0.4712
76	16.589	2.8088
76	1.785	0.5794
76	0.80805	-0.21313
76	2.9054	1.0666
76	0.83795	-0.17679
76	0.47907	-0.73591
76	3.4003	1.2239
76	1.8798	0.63119
76	92.51	4.5273
76	21.922	3.0875
76	0.34858	-1.0539
76	2.1254	0.75394
76	7.9427	2.0723
76	0.38991	-0.94183
76	5.0737	1.6241
76	43.805	3.7798
76	10.723	2.3724
76	5.1265	1.6344
76	0.50006	-0.69302
76	7.706	2.042
76	3.8905	1.3585
76	2.1075	0.7455
76	2.3167	0.84013
76	50.345	3.9189
76	2.3832	0.86846
76	2.42	0.88378
76	11.134	2.41
76	14.385	2.6662
76	6.9667	1.9411
76	16.122	2.7802
76	1.7111	0.53711
76	2.5483	0.93542
76	13.172	2.5781
76	0.70541	-0.34897
76	1.6582	0.50573
76	60.158	4.097
76	9.7262	2.2748
76	2.8166	1.0355
76	7.7142	2.0431
76	39.724	3.6819
76	0.94533	-0.05622
76	6.6731	1.8981
76	8.1538	2.0985
76	2.3096	0.83708
76	2.2633	0.81684
76	6.8166	1.9194
76	8.1178	2.0941
76	2.422	0.8846
76	61.549	4.1198
76	157.57	5.0598
76	1.599	0.46938
76	191.66	5.2557
76	134.79	4.9037
76	1.4085	0.34252
76	3.2061	1.1651
76	0.076518	-2.5702
76	1.2836	0.24964
76	256.61	5.5476
76	6.7167	1.9046
76	2.0911	0.73769
76	0.86297	-0.14738
76	9.7649	2.2788
76	1.8472	0.61366
76	13.062	2.5697
76	2.8424	1.0447
76	1.8455	0.61272
76	11.61	2.4519
76	7.6394	2.0333
76	20.335	3.0123
76	3.2227	1.1702
76	26.224	3.2667
76	2.6321	0.96779
76	4.8208	1.5729
76	15.004	2.7083
76	36.22	3.5896
76	17.666	2.8716
76	1.2328	0.20927
76	0.74304	-0.297
76	4.3698	1.4747
76	3.2394	1.1754
76	17.639	2.8701
76	52.969	3.9697
76	2.7871	1.025
76	3.1488	1.147
76	16.288	2.7904
76	1.6549	0.50374
76	3.4088	1.2264
77	11.618	2.4526
77	16.183	2.784
77	43.429	3.7711
77	16.13	2.7807
77	55.788	4.0216
77	41.279	3.7204
77	21.307	3.059
77	3.9647	1.3774
77	20.998	3.0444
77	0.52924	-0.63631
77	10.288	2.331
77	1.4253	0.3544
77	7.4992	2.0148
77	4.9097	1.5912
77	1.6825	0.52026
77	23.439	3.1544
77	5.3981	1.686
77	11.356	2.4298
77	77.746	4.3534
77	4.9415	1.5977
77	2.1699	0.77467
77	5.6246	1.7271
77	0.98324	-0.016906
77	2.0352	0.71062
77	21.933	3.088
77	22.033	3.0926
77	15.576	2.7457
77	20.287	3.01
77	1.5201	0.41874
77	23.558	3.1595
77	1.2151	0.19486
77	3.0477	1.1144
77	2.3279	0.84495
77	2.0582	0.72182
77	20.081	2.9998
77	11.334	2.4278
77	12.325	2.5116
77	5.2142	1.6514
77	6.1927	1.8234
77	7.5932	2.0273
77	2.0368	0.71138
77	30.941	3.4321
77	2.995	1.097
77	1.983	0.68462
77	34.83	3.5505
77	0.70698	-0.34675
77	2.2896	0.82836
77	4.9889	1.6072
77	11.545	2.4462
77	32.518	3.4818
77	11.768	2.4653
77	1.9178	0.65119
77	15.891	2.7658
77	0.2605	-1.3452
77	1.8743	0.62821
77	9.1966	2.2188
77	0.81986	-0.19862
77	17.939	2.887
77	2.0936	0.73887
77	8.4221	2.1309
77	16.75	2.8184
77	5.469	1.6991
77	28.147	3.3374
77	10.643	2.3649
77	6.1472	1.816
77	4.4936	1.5026
77	5.0462	1.6186
77	7.7144	2.0431
77	9.4536	2.2464
77	0.62325	-0.4728
77	10.857	2.3848
77	3.4541	1.2396
77	23.849	3.1717
77	5.7663	1.752
77	23.21	3.1446
77	2.1433	0.76232
77	6.156	1.8174
77	12.981	2.5635
77	2.0899	0.73711
77	9.2158	2.2209
77	3.4848	1.2484
77	5.1829	1.6454
78	6.2675	1.8354
78	6.2625	1.8346
78	2.6331	0.96818
78	4.274	1.4525
78	8.2833	2.1142
78	3.5543	1.2682
78	6.681	1.8993
78	1.05	0.048749
78	2.4936	0.91371
78	18.838	2.9359
78	3.1162	1.1366
78	5.6343	1.7289
78	3.8576	1.35
78	0.58596	-0.5345
78	3.3361	1.2048
78	41.74	3.7315
78	3.1022	1.1321
78	8.1155	2.0938
78	0.33085	-1.1061
78	21.151	3.0517
78	1.2044	0.18602
78	11.738	2.4628
78	10.143	2.3168
78	120.56	4.7921
78	26.802	3.2885
78	0.63828	-0.44898
78	0.30521	-1.1868
78	24.839	3.2124
78	39.261	3.6702
78	12.131	2.4957
78	0.46463	-0.76652
78	5.5962	1.7221
78	8.6122	2.1532
78	6.5535	1.88
78	1.9777	0.68193
78	8.0575	2.0866
78	11.898	2.4763
78	5.926	1.7793
78	2.0375	0.71174
78	29.783	3.3939
78	0.14849	-1.9072
78	5.6727	1.7357
78	0.30069	-1.2017
78	6.4865	1.8697
78	5.9202	1.7784
78	0.54142	-0.61356
78	10.703	2.3705
78	10.453	2.3468
78	1.9905	0.68839
78	0.92374	-0.079324
78	10.922	2.3908
78	10.06	2.3086
78	16.807	2.8218
78	21.743	3.0793
78	1.4666	0.38292
78	0.84777	-0.16515
78	6.6588	1.8959
78	6.7259	1.906
78	2.6716	0.98269
78	1.1486	0.13855
78	47.587	3.8626
78	3.1292	1.1408
78	8.5302	2.1436
78	14.151	2.6498
78	3.0926	1.129
78	9.3572	2.2362
78	3.9747	1.38
78	10.705	2.3707
78	1.637	0.49287
78	1.4402	0.36479
78	0.13193	-2.0255
78	0.29427	-1.2233
78	4.6841	1.5442
78	7.8142	2.0559
78	3.2913	1.1913
78	119.89	4.7865
78	27.96	3.3308
78	5.8952	1.7741
78	1.1295	0.1218
78	3.6656	1.299
78	6.7615	1.9112
78	8.3402	2.1211
78	22.886	3.1305
78	9.7243	2.2746
78	3.007	1.1009
78	3.7446	1.3203
78	28.728	3.3579
78	14.895	2.701
78	24.998	3.2188
78	13.655	2.6141
78	0.94068	-0.061153
78	15.807	2.7604
78	1.4987	0.40457
78	3.6626	1.2982
78	0.90318	-0.10184
78	5.7813	1.7546
78	37.067	3.6127
78	21.654	3.0752
78	0.3355	-1.0921
78	0.41709	-0.87445
78	1.5824	0.45894
78	6.2959	1.8399
78	13.141	2.5757
78	9.5898	2.2607
78	5.332	1.6737
78	2.0025	0.6944
78	21.224	3.0551
78	4.4227	1.4867
79	20.36	3.0136
79	3.4182	1.2291
79	17.589	2.8673
79	6.5449	1.8787
79	2.2304	0.80217
79	0.45082	-0.79668
79	9.457	2.2468
79	5.6839	1.7376
79	1.1887	0.1729
79	0.68787	-0.37415
79	14.539	2.6768
79	1.5834	0.45959
79	27.467	3.313
79	0.6214	-0.47578
79	5.2165	1.6518
79	0.39961	-0.91728
79	3.0039	1.0999
79	6.4219	1.8597
79	2.9401	1.0784
79	3.3177	1.1993
79	2.8244	1.0383
79	5.7936	1.7568
79	4.9606	1.6015
79	4.852	1.5794
79	0.27894	-1.2768
79	18.602	2.9233
79	21.097	3.0491
79	2.4955	0.91447
79	4.5375	1.5124
79	13.132	2.575
79	4.918	1.5929
79	0.98234	-0.017816
79	6.1899	1.8229
79	8.1386	2.0966
79	1.1515	0.14108
79	8.5065	2.1408
79	10.72	2.3721
79	22.885	3.1305
79	1.2069	0.18804
79	2.6445	0.97248
79	8.3287	2.1197
79	13.389	2.5945
79	9.6044	2.2622
79	5.1205	1.6333
79	2.3888	0.8708
79	0.26861	-1.3145
79	16.202	2.7852
79	5.4294	1.6918
79	8.0903	2.0907
79	27.095	3.2994
79	1.7276	0.54674
79	19.378	2.9641
79	2.209	0.79254
79	4.0952	1.4098
79	27.387	3.3101
79	29.375	3.3801
79	3.0248	1.1069
79	18.476	2.9165
79	14.761	2.692
79	14.977	2.7065
79	12.887	2.5562
79	28.374	3.3455
79	4.9606	1.6015
79	8.4834	2.1381
79	5.1713	1.6431
79	4.6821	1.5437
79	0.95082	-0.050428
79	11.49	2.4415
79	2.0749	0.72991
79	14.928	2.7032
79	13.455	2.5994
79	40.913	3.7115
79	1.7421	0.55507
79	6.0432	1.7989
79	12.435	2.5205
79	4.1418	1.4211
79	5.942	1.782
79	44.507	3.7957
79	5.0019	1.6098
79	0.43932	-0.82253
79	0.77344	-0.2569
79	0.20778	-1.5713
79	2.8383	1.0432
79	7.4509	2.0083
79	5.0303	1.6155
79	1.5497	0.43809
79	4.955	1.6004
79	4.2094	1.4373
79	5.1819	1.6452
79	15.587	2.7464
79	14.345	2.6634
79	3.1305	1.1412
79	2.0998	0.74183
79	2.1698	0.77465
79	9.4679	2.2479
79	20.527	3.0217
79	0.6623	-0.41204
79	1.1434	0.13404
79	13.949	2.6354
79	18.104	2.8962
79	14.841	2.6974
79	4.6345	1.5335
79	5.6697	1.7351
80	1.6833	0.52076
80	0.65825	-0.41818
80	29.965	3.4
80	6.3518	1.8487
80	21.031	3.046
80	3.1224	1.1386
80	8.8234	2.1774
80	36.019	3.5841
80	3.9949	1.385
80	15.963	2.7703
80	12.396	2.5174
80	3.2813	1.1882
80	1.6455	0.49805
80	29.487	3.384
80	10.486	2.3501
80	13.145	2.5761
80	6.4427	1.8629
80	1.7446	0.55653
80	12.621	2.5354
80	1.0982	0.093714
80	24.941	3.2165
80	1.0963	0.091977
80	29.165	3.373
80	0.12048	-2.1162
80	48.742	3.8865
80	3.4993	1.2525
80	7.7338	2.0456
80	0.79291	-0.23204
80	0.81307	-0.20694
80	0.9629	-0.037805
80	3.5466	1.266
80	2.7907	1.0263
80	8.7613	2.1703
80	6.1201	1.8116
80	1.3877	0.32764
80	2.3237	0.84316
80	29.458	3.383
80	3.3062	1.1958
80	1.9441	0.66477
80	6.9455	1.9381
80	4.5184	1.5081
80	3.0771	1.124
80	14.075	2.6444
80	3.6267	1.2883
80	0.34155	-1.0743
80	7.0545	1.9537
80	3.3939	1.222
80	15.343	2.7307
80	5.385	1.6836
80	3.1068	1.1336
80	2.6328	0.96806
80	2.9808	1.0922
80	1.9284	0.6567
80	4.5467	1.5144
80	11.726	2.4618
80	8.4711	2.1367
80	4.6056	1.5273
80	19.954	2.9934
80	1.9931	0.68971
80	0.76152	-0.27244
80	56.296	4.0306
80	6.5163	1.8743
80	38.325	3.6461
80	4.1592	1.4253
80	1.1418	0.13258
80	12.121	2.4949
80	34.051	3.5279
80	51.039	3.9326
80	1.6801	0.51887
80	4.6276	1.532
80	13.148	2.5763
80	1.1558	0.14484
80	3.209	1.166
80	22.443	3.111
80	5.8655	1.7691
80	1.2921	0.25628
80	1.1213	0.11452
80	1.024	0.023692
81	0.70411	-0.35082
81	2.3564	0.85714
81	6.6201	1.8901
81	3.7598	1.3244
81	0.91385	-0.090092
81	11.928	2.4789
81	0.40348	-0.90764
81	10.913	2.39
81	11.268	2.4219
81	11.855	2.4727
81	3.9614	1.3766
81	19.9	2.9907
81	5.5247	1.7092
81	3.4172	1.2288
81	5.5992	1.7226
81	4.635	1.5336
81	6.3358	1.8462
81	6.3025	1.8409
81	16.041	2.7751
81	7.0748	1.9565
81	12.112	2.4942
81	5.5496	1.7137
81	23.111	3.1403
81	5.2936	1.6665
81	3.2077	1.1656
81	8.5566	2.1467
81	12.159	2.4981
81	1.6469	0.49888
81	8.8319	2.1784
81	2.5012	0.91678
81	5.482	1.7015
81	17.7	2.8736
81	0.82286	-0.19497
81	1.3235	0.28027
81	16.498	2.8032
81	28.707	3.3572
81	22.378	3.1081
81	1.6153	0.47951
81	4.0669	1.4029
81	8.8642	2.182
81	13.717	2.6187
81	0.74595	-0.29309
81	9.0841	2.2065
81	3.8512	1.3484
81	6.271	1.8359
81	3.7606	1.3246
81	7.583	2.0259
81	0.96725	-0.033298
81	12.873	2.5551
81	5.9144	1.7774
81	2.7475	1.0107
81	5.6387	1.7297
81	6.508	1.873
81	5.2142	1.6514
81	13.586	2.609
81	1.5384	0.43076
81	2.3691	0.86253
81	3.2218	1.1699
81	1.5164	0.41633
81	3.8922	1.359
81	1.9474	0.66647
81	6.8336	1.9219
81	16.511	2.804
81	19.454	2.968
81	5.8691	1.7697
81	6.6881	1.9003
81	4.2223	1.4404
81	1.5007	0.40594
81	4.8124	1.5712
81	27.658	3.3199
81	15.149	2.7179
81	3.9895	1.3837
81	3.7901	1.3324
81	2.5162	0.92275
81	4.061	1.4014
81	7.662	2.0363
81	4.6589	1.5388
82	2.2539	0.81264
82	2.6818	0.98647
82	5.1966	1.648
82	16.312	2.7919
82	15.912	2.7671
82	2.7756	1.0209
82	2.9772	1.091
82	1.2343	0.21048
82	1.0096	0.0095516
82	10.519	2.3532
82	6.6361	1.8925
82	3.9612	1.3765
82	12.184	2.5001
82	0.53715	-0.62148
82	8.4249	2.1312
82	7.9376	2.0716
82	0.46247	-0.77118
82	1.7826	0.57805
82	3.2113	1.1667
82	0.38678	-0.9499
82	11.532	2.4451
82	1.9921	0.68917
82	3.0239	1.1065
82	2.8382	1.0432
82	37.415	3.6221
82	12.384	2.5164
82	2.4153	0.88183
82	2.8377	1.043
82	6.0346	1.7975
82	0.40433	-0.90552
82	2.8441	1.0452
82	10.777	2.3774
82	0.45245	-0.79308
82	19.069	2.9481
82	1.9068	0.64543
82	3.4132	1.2276
82	1.1189	0.11235
82	2.4349	0.88991
82	13.41	2.596
82	19.665	2.9788
82	0.60631	-0.50037
82	5.9552	1.7843
82	8.5186	2.1423
82	4.7946	1.5675
82	1.9117	0.64798
82	4.1238	1.4168
82	4.4356	1.4897
82	7.2432	1.9801
82	1.199	0.18152
82	1.7897	0.58204
82	2.8116	1.0337
82	4.0643	1.4022
82	2.3242	0.84336
82	1.4966	0.40321
82	0.51447	-0.66461
82	21.454	3.0659
82	2.1464	0.76381
82	6.2097	1.8261
82	1.1694	0.1565
82	2.775	1.0206
82	3.6784	1.3025
82	7.3863	1.9996
82	6.0327	1.7972
82	2.9489	1.0814
82	10.214	2.3238
82	4.8048	1.5696
82	8.6543	2.1581
82	5.2323	1.6548
82	12.283	2.5082
82	1.998	0.69213
83	0.96666	-0.033907
83	8.8412	2.1794
83	1.1596	0.14807
83	2.0574	0.72145
83	4.9536	1.6001
83	9.2283	2.2223
83	11.789	2.4671
83	7.2574	1.982
83	8.5165	2.142
83	17.126	2.8406
83	0.67158	-0.39812
83	3.209	1.166
83	4.7585	1.5599
83	2.5827	0.94883
83	8.0553	2.0863
83	1.1458	0.13615
83	4.7126	1.5502
83	5.8537	1.7671
83	4.6518	1.5373
83	1.7421	0.55507
83	1.9484	0.667
83	5.8362	1.7641
83	3.4937	1.251
83	12.407	2.5183
83	1.8524	0.61648
83	4.8244	1.5737
83	0.99964	-0.00035596
83	5.7828	1.7549
83	0.38752	-0.94799
83	34.583	3.5434
83	2.9387	1.078
83	2.2632	0.81677
83	6.5228	1.8753
83	5.6206	1.7264
83	4.24	1.4446
83	0.28506	-1.2551
83	6.2089	1.826
83	8.8963	2.1856
83	20.624	3.0264
83	7.7944	2.0534
83	0.52014	-0.65366
83	3.3986	1.2234
83	44.74	3.8009
83	0.35383	-1.039
83	21.229	3.0553
83	4.7243	1.5527
83	2.0872	0.73583
83	1.9358	0.66053
83	16.388	2.7966
83	7.0312	1.9504
83	14.431	2.6694
83	16.234	2.7871
83	1.9929	0.68958
83	20.934	3.0414
83	6.611	1.8887
83	1.8909	0.63707
83	2.1739	0.77653
83	4.6468	1.5362
83	0.89943	-0.10599
83	1.6264	0.48634
83	0.6816	-0.38332
83	10.009	2.3035
83	2.7033	0.99449
83	20.507	3.0208
83	1.7982	0.5868
83	2.0674	0.72629
83	7.3439	1.9939
83	14.189	2.6524
83	2.4644	0.90196
83	4.403	1.4823
83	12.927	2.5593
83	14.768	2.6924
83	2.8429	1.0448
83	2.5693	0.94363
83	6.1445	1.8156
83	3.1774	1.156
83	3.5754	1.2741
83	1.5926	0.46538
83	4.1664	1.4271
83	3.5899	1.2781
83	15.247	2.7244
83	1.09	0.086174
83	8.2107	2.1054
83	2.7146	0.99865
83	18.861	2.9371
83	12.699	2.5416
83	0.8544	-0.15735
83	0.051659	-2.9631
83	7.4955	2.0143
84	2.3125	0.83835
84	3.1695	1.1536
84	1.8238	0.60091
84	1.8402	0.60985
84	6.5403	1.878
84	5.5128	1.7071
84	0.086283	-2.4501
84	2.0375	0.71171
84	5.4744	1.7001
84	8.9242	2.1888
84	3.8502	1.3481
84	3.203	1.1641
84	2.1233	0.75297
84	4.8182	1.5724
84	1.0747	0.072075
84	7.4686	2.0107
84	9.3039	2.2304
84	5.1488	1.6388
84	6.8488	1.9241
84	1.5669	0.44912
84	0.73867	-0.3029
84	3.8412	1.3458
84	3.3804	1.218
84	1.0999	0.095201
84	10.79	2.3786
84	14.4	2.6673
84	22.714	3.123
84	7.4389	2.0067
84	2.5999	0.95548
84	1.7693	0.57059
84	1.2952	0.25865
84	4.4787	1.4993
84	0.32309	-1.1298
84	10.621	2.3628
84	0.99761	-0.0023885
84	3.9672	1.378
84	0.66401	-0.40945
84	3.1539	1.1486
84	1.6176	0.48092
84	3.1789	1.1565
84	3.875	1.3545
84	8.0732	2.0885
84	3.6479	1.2941
84	3.2303	1.1726
84	1.5316	0.4263
84	2.3388	0.84962
84	1.6914	0.52555
84	15.13	2.7167
84	11.561	2.4476
84	1.4449	0.36807
84	1.7338	0.5503
84	17.113	2.8398
84	2.1233	0.75296
84	3.9568	1.3754
84	1.5052	0.40894
84	4.2216	1.4402
84	20.914	3.0404
84	7.878	2.0641
84	1.0619	0.060056
84	15.213	2.7221
84	6.2995	1.8405
84	0.92389	-0.079158
84	3.6496	1.2946
84	1.9898	0.68801
84	1.4031	0.33865
84	0.28454	-1.2569
84	2.879	1.0575
84	37.337	3.62
84	0.32205	-1.1331
84	1.6012	0.47078
84	11.08	2.4051
84	2.6171	0.96207
84	0.56262	-0.57515
84	4.0862	1.4076
84	0.34677	-1.0591
84	7.746	2.0472
84	11.04	2.4015
84	0.2834	-1.2609
84	4.6535	1.5376
84	1.1627	0.15075
84	9.2983	2.2298
85	4.6698	1.5411
85	7.0226	1.9491
85	1.9176	0.65105
85	5.8752	1.7707
85	0.54602	-0.6051
85	5.2795	1.6638
85	7.3809	1.9989
85	6.3126	1.8425
85	4.9252	1.5944
85	7.4442	2.0074
85	0.4569	-0.78328
85	7.4105	2.0029
85	17.743	2.876
[truncated: 585 more rows]
