# Supplementary material for: Quantifying the Potential for Future Gene Therapy to Lower Lifetime Risk of Polygenic Late-Onset Diseases
Source: MDPI journal article supplement (doi:10.3390/ijms20133352), 2019-07-08
Supplement: s2 [file s2 › SuppFiles/Results/LODsCommonLow/CAD/DensityPostAnalysis.csv]

age	A..1..	A..2..	A..3..	A..4..	A..5..	A..6..	A..7..	A..8..	A..9..	A..10..	A..11..	A..12..	A..13..	A..14..	A..15..	A..16..	A..17..	A..18..	A..19..	A..20..
1	0.0000000e+00	0.0000000e+00	0.0000000e+00	0.0000000e+00	0.0000000e+00	0.0000000e+00	0.0000000e+00	0.0000000e+00	0.0000000e+00	0.0000000e+00	0.0000000e+00	0.0000000e+00	0.0000000e+00	0.0000000e+00	0.0000000e+00	0.0000000e+00	0.0000000e+00	0.0000000e+00	0.0000000e+00	0.0000000e+00
2	0.0000000e+00	0.0000000e+00	0.0000000e+00	0.0000000e+00	0.0000000e+00	0.0000000e+00	0.0000000e+00	0.0000000e+00	0.0000000e+00	0.0000000e+00	0.0000000e+00	0.0000000e+00	0.0000000e+00	0.0000000e+00	0.0000000e+00	0.0000000e+00	0.0000000e+00	0.0000000e+00	0.0000000e+00	0.0000000e+00
3	0.0000000e+00	0.0000000e+00	0.0000000e+00	0.0000000e+00	0.0000000e+00	0.0000000e+00	0.0000000e+00	0.0000000e+00	0.0000000e+00	0.0000000e+00	0.0000000e+00	0.0000000e+00	0.0000000e+00	0.0000000e+00	0.0000000e+00	0.0000000e+00	0.0000000e+00	0.0000000e+00	0.0000000e+00	0.0000000e+00
4	0.0000000e+00	0.0000000e+00	0.0000000e+00	0.0000000e+00	0.0000000e+00	0.0000000e+00	0.0000000e+00	0.0000000e+00	0.0000000e+00	0.0000000e+00	0.0000000e+00	0.0000000e+00	0.0000000e+00	0.0000000e+00	0.0000000e+00	0.0000000e+00	0.0000000e+00	0.0000000e+00	0.0000000e+00	0.0000000e+00
5	0.0000000e+00	0.0000000e+00	0.0000000e+00	0.0000000e+00	0.0000000e+00	0.0000000e+00	0.0000000e+00	0.0000000e+00	0.0000000e+00	0.0000000e+00	0.0000000e+00	0.0000000e+00	0.0000000e+00	0.0000000e+00	0.0000000e+00	0.0000000e+00	0.0000000e+00	0.0000000e+00	0.0000000e+00	0.0000000e+00
6	0.0000000e+00	0.0000000e+00	0.0000000e+00	0.0000000e+00	0.0000000e+00	0.0000000e+00	0.0000000e+00	0.0000000e+00	0.0000000e+00	0.0000000e+00	0.0000000e+00	0.0000000e+00	0.0000000e+00	0.0000000e+00	0.0000000e+00	0.0000000e+00	0.0000000e+00	0.0000000e+00	0.0000000e+00	0.0000000e+00
7	0.0000000e+00	0.0000000e+00	0.0000000e+00	0.0000000e+00	0.0000000e+00	0.0000000e+00	0.0000000e+00	0.0000000e+00	0.0000000e+00	0.0000000e+00	0.0000000e+00	0.0000000e+00	0.0000000e+00	0.0000000e+00	0.0000000e+00	0.0000000e+00	0.0000000e+00	0.0000000e+00	0.0000000e+00	0.0000000e+00
8	0.0000000e+00	0.0000000e+00	0.0000000e+00	0.0000000e+00	0.0000000e+00	0.0000000e+00	0.0000000e+00	0.0000000e+00	0.0000000e+00	0.0000000e+00	0.0000000e+00	0.0000000e+00	0.0000000e+00	0.0000000e+00	0.0000000e+00	0.0000000e+00	0.0000000e+00	0.0000000e+00	0.0000000e+00	0.0000000e+00
9	0.0000000e+00	0.0000000e+00	0.0000000e+00	0.0000000e+00	0.0000000e+00	0.0000000e+00	0.0000000e+00	0.0000000e+00	0.0000000e+00	0.0000000e+00	0.0000000e+00	0.0000000e+00	0.0000000e+00	0.0000000e+00	0.0000000e+00	0.0000000e+00	0.0000000e+00	0.0000000e+00	0.0000000e+00	0.0000000e+00
10	0.0000000e+00	0.0000000e+00	0.0000000e+00	0.0000000e+00	0.0000000e+00	0.0000000e+00	0.0000000e+00	0.0000000e+00	0.0000000e+00	0.0000000e+00	0.0000000e+00	0.0000000e+00	0.0000000e+00	0.0000000e+00	0.0000000e+00	0.0000000e+00	0.0000000e+00	0.0000000e+00	0.0000000e+00	0.0000000e+00
11	0.0000000e+00	0.0000000e+00	0.0000000e+00	0.0000000e+00	0.0000000e+00	0.0000000e+00	0.0000000e+00	0.0000000e+00	0.0000000e+00	0.0000000e+00	0.0000000e+00	0.0000000e+00	0.0000000e+00	0.0000000e+00	0.0000000e+00	0.0000000e+00	0.0000000e+00	0.0000000e+00	0.0000000e+00	0.0000000e+00
12	0.0000000e+00	0.0000000e+00	0.0000000e+00	0.0000000e+00	0.0000000e+00	0.0000000e+00	0.0000000e+00	0.0000000e+00	0.0000000e+00	0.0000000e+00	0.0000000e+00	0.0000000e+00	0.0000000e+00	0.0000000e+00	0.0000000e+00	0.0000000e+00	0.0000000e+00	0.0000000e+00	0.0000000e+00	0.0000000e+00
13	0.0000000e+00	0.0000000e+00	0.0000000e+00	0.0000000e+00	0.0000000e+00	0.0000000e+00	0.0000000e+00	0.0000000e+00	0.0000000e+00	0.0000000e+00	0.0000000e+00	0.0000000e+00	0.0000000e+00	0.0000000e+00	0.0000000e+00	0.0000000e+00	0.0000000e+00	0.0000000e+00	0.0000000e+00	0.0000000e+00
14	0.0000000e+00	0.0000000e+00	0.0000000e+00	0.0000000e+00	0.0000000e+00	0.0000000e+00	0.0000000e+00	0.0000000e+00	0.0000000e+00	0.0000000e+00	0.0000000e+00	0.0000000e+00	0.0000000e+00	0.0000000e+00	0.0000000e+00	0.0000000e+00	0.0000000e+00	0.0000000e+00	0.0000000e+00	0.0000000e+00
15	0.0000000e+00	0.0000000e+00	0.0000000e+00	0.0000000e+00	0.0000000e+00	0.0000000e+00	0.0000000e+00	0.0000000e+00	0.0000000e+00	0.0000000e+00	0.0000000e+00	0.0000000e+00	0.0000000e+00	0.0000000e+00	0.0000000e+00	0.0000000e+00	0.0000000e+00	0.0000000e+00	0.0000000e+00	0.0000000e+00
16	0.0000000e+00	0.0000000e+00	0.0000000e+00	0.0000000e+00	0.0000000e+00	0.0000000e+00	0.0000000e+00	0.0000000e+00	0.0000000e+00	0.0000000e+00	0.0000000e+00	0.0000000e+00	0.0000000e+00	0.0000000e+00	0.0000000e+00	0.0000000e+00	0.0000000e+00	0.0000000e+00	0.0000000e+00	0.0000000e+00
17	0.0000000e+00	0.0000000e+00	0.0000000e+00	0.0000000e+00	0.0000000e+00	0.0000000e+00	0.0000000e+00	0.0000000e+00	0.0000000e+00	0.0000000e+00	0.0000000e+00	0.0000000e+00	0.0000000e+00	0.0000000e+00	0.0000000e+00	0.0000000e+00	0.0000000e+00	0.0000000e+00	0.0000000e+00	0.0000000e+00
18	0.0000000e+00	0.0000000e+00	0.0000000e+00	0.0000000e+00	0.0000000e+00	0.0000000e+00	0.0000000e+00	0.0000000e+00	0.0000000e+00	0.0000000e+00	0.0000000e+00	0.0000000e+00	0.0000000e+00	0.0000000e+00	0.0000000e+00	0.0000000e+00	0.0000000e+00	0.0000000e+00	0.0000000e+00	0.0000000e+00
19	0.0000000e+00	0.0000000e+00	0.0000000e+00	0.0000000e+00	0.0000000e+00	0.0000000e+00	0.0000000e+00	0.0000000e+00	0.0000000e+00	0.0000000e+00	0.0000000e+00	0.0000000e+00	0.0000000e+00	0.0000000e+00	0.0000000e+00	0.0000000e+00	0.0000000e+00	0.0000000e+00	0.0000000e+00	0.0000000e+00
20	0.0000000e+00	0.0000000e+00	0.0000000e+00	0.0000000e+00	0.0000000e+00	0.0000000e+00	0.0000000e+00	0.0000000e+00	0.0000000e+00	0.0000000e+00	0.0000000e+00	0.0000000e+00	0.0000000e+00	0.0000000e+00	0.0000000e+00	0.0000000e+00	0.0000000e+00	0.0000000e+00	0.0000000e+00	0.0000000e+00
21	0.0000000e+00	0.0000000e+00	0.0000000e+00	0.0000000e+00	0.0000000e+00	0.0000000e+00	0.0000000e+00	0.0000000e+00	0.0000000e+00	0.0000000e+00	0.0000000e+00	0.0000000e+00	0.0000000e+00	0.0000000e+00	0.0000000e+00	0.0000000e+00	0.0000000e+00	0.0000000e+00	0.0000000e+00	0.0000000e+00
22	0.0000000e+00	0.0000000e+00	0.0000000e+00	0.0000000e+00	0.0000000e+00	0.0000000e+00	0.0000000e+00	0.0000000e+00	0.0000000e+00	0.0000000e+00	0.0000000e+00	0.0000000e+00	0.0000000e+00	0.0000000e+00	0.0000000e+00	0.0000000e+00	0.0000000e+00	0.0000000e+00	0.0000000e+00	0.0000000e+00
23	0.0000000e+00	0.0000000e+00	0.0000000e+00	0.0000000e+00	0.0000000e+00	0.0000000e+00	0.0000000e+00	0.0000000e+00	0.0000000e+00	0.0000000e+00	0.0000000e+00	0.0000000e+00	0.0000000e+00	0.0000000e+00	0.0000000e+00	0.0000000e+00	0.0000000e+00	0.0000000e+00	0.0000000e+00	0.0000000e+00
24	0.0000000e+00	0.0000000e+00	0.0000000e+00	0.0000000e+00	0.0000000e+00	0.0000000e+00	0.0000000e+00	0.0000000e+00	0.0000000e+00	0.0000000e+00	0.0000000e+00	0.0000000e+00	0.0000000e+00	0.0000000e+00	0.0000000e+00	0.0000000e+00	0.0000000e+00	0.0000000e+00	0.0000000e+00	0.0000000e+00
25	0.0000000e+00	0.0000000e+00	0.0000000e+00	0.0000000e+00	0.0000000e+00	0.0000000e+00	0.0000000e+00	0.0000000e+00	0.0000000e+00	0.0000000e+00	0.0000000e+00	0.0000000e+00	0.0000000e+00	0.0000000e+00	0.0000000e+00	0.0000000e+00	0.0000000e+00	0.0000000e+00	0.0000000e+00	0.0000000e+00
26	0.0000000e+00	0.0000000e+00	0.0000000e+00	0.0000000e+00	0.0000000e+00	0.0000000e+00	0.0000000e+00	0.0000000e+00	0.0000000e+00	0.0000000e+00	0.0000000e+00	0.0000000e+00	0.0000000e+00	0.0000000e+00	0.0000000e+00	0.0000000e+00	0.0000000e+00	0.0000000e+00	0.0000000e+00	0.0000000e+00
27	0.0000000e+00	0.0000000e+00	0.0000000e+00	0.0000000e+00	0.0000000e+00	0.0000000e+00	0.0000000e+00	0.0000000e+00	0.0000000e+00	0.0000000e+00	0.0000000e+00	0.0000000e+00	0.0000000e+00	0.0000000e+00	0.0000000e+00	0.0000000e+00	0.0000000e+00	0.0000000e+00	0.0000000e+00	0.0000000e+00
28	0.0000000e+00	0.0000000e+00	0.0000000e+00	0.0000000e+00	0.0000000e+00	0.0000000e+00	0.0000000e+00	0.0000000e+00	0.0000000e+00	0.0000000e+00	0.0000000e+00	0.0000000e+00	0.0000000e+00	0.0000000e+00	0.0000000e+00	0.0000000e+00	0.0000000e+00	0.0000000e+00	0.0000000e+00	0.0000000e+00
29	0.0000000e+00	0.0000000e+00	0.0000000e+00	0.0000000e+00	0.0000000e+00	0.0000000e+00	0.0000000e+00	0.0000000e+00	0.0000000e+00	0.0000000e+00	0.0000000e+00	0.0000000e+00	0.0000000e+00	0.0000000e+00	0.0000000e+00	0.0000000e+00	0.0000000e+00	0.0000000e+00	0.0000000e+00	0.0000000e+00
30	0.0000000e+00	0.0000000e+00	0.0000000e+00	0.0000000e+00	0.0000000e+00	0.0000000e+00	0.0000000e+00	0.0000000e+00	0.0000000e+00	0.0000000e+00	0.0000000e+00	0.0000000e+00	0.0000000e+00	0.0000000e+00	0.0000000e+00	0.0000000e+00	0.0000000e+00	0.0000000e+00	0.0000000e+00	0.0000000e+00
31	0.0000000e+00	0.0000000e+00	0.0000000e+00	0.0000000e+00	0.0000000e+00	0.0000000e+00	0.0000000e+00	0.0000000e+00	0.0000000e+00	0.0000000e+00	0.0000000e+00	0.0000000e+00	0.0000000e+00	0.0000000e+00	0.0000000e+00	0.0000000e+00	0.0000000e+00	0.0000000e+00	0.0000000e+00	0.0000000e+00
32	0.0000000e+00	0.0000000e+00	0.0000000e+00	0.0000000e+00	0.0000000e+00	0.0000000e+00	0.0000000e+00	0.0000000e+00	0.0000000e+00	0.0000000e+00	0.0000000e+00	0.0000000e+00	0.0000000e+00	0.0000000e+00	0.0000000e+00	0.0000000e+00	0.0000000e+00	0.0000000e+00	0.0000000e+00	0.0000000e+00
33	0.0000000e+00	0.0000000e+00	0.0000000e+00	0.0000000e+00	0.0000000e+00	0.0000000e+00	0.0000000e+00	0.0000000e+00	0.0000000e+00	0.0000000e+00	0.0000000e+00	0.0000000e+00	0.0000000e+00	0.0000000e+00	0.0000000e+00	0.0000000e+00	0.0000000e+00	0.0000000e+00	0.0000000e+00	0.0000000e+00
34	0.0000000e+00	0.0000000e+00	0.0000000e+00	0.0000000e+00	0.0000000e+00	0.0000000e+00	0.0000000e+00	0.0000000e+00	0.0000000e+00	0.0000000e+00	0.0000000e+00	0.0000000e+00	0.0000000e+00	0.0000000e+00	0.0000000e+00	0.0000000e+00	0.0000000e+00	0.0000000e+00	0.0000000e+00	0.0000000e+00
35	0.0000000e+00	0.0000000e+00	0.0000000e+00	0.0000000e+00	0.0000000e+00	0.0000000e+00	0.0000000e+00	0.0000000e+00	0.0000000e+00	0.0000000e+00	0.0000000e+00	0.0000000e+00	0.0000000e+00	0.0000000e+00	0.0000000e+00	0.0000000e+00	0.0000000e+00	0.0000000e+00	0.0000000e+00	0.0000000e+00
36	7.1759924e-05	7.2180139e-05	7.2537800e-05	7.2837690e-05	1.7958814e-05	1.8063978e-05	1.8153487e-05	1.8228539e-05	4.4899517e-06	4.5162441e-06	4.5386226e-06	4.5573865e-06	1.1224889e-06	1.1290620e-06	1.1346566e-06	1.1393476e-06	2.8062206e-07	2.8226533e-07	2.8366399e-07	2.8483673e-07
37	1.5351432e-04	1.5444914e-04	1.5523814e-04	1.5591680e-04	3.8464987e-05	3.8699219e-05	3.8896914e-05	3.9066960e-05	9.6173865e-06	9.6759514e-06	9.7253810e-06	9.7678974e-06	2.4043511e-06	2.4189923e-06	2.4313498e-06	2.4419789e-06	6.0108700e-07	6.0474731e-07	6.0783666e-07	6.1049394e-07
38	2.4601201e-04	2.4757796e-04	2.4888081e-04	2.5001669e-04	6.1725522e-05	6.2118426e-05	6.2445316e-05	6.2730314e-05	1.5434320e-05	1.5532564e-05	1.5614302e-05	1.5685565e-05	3.8585914e-06	3.8831526e-06	3.9035872e-06	3.9214030e-06	9.6464587e-07	9.7078616e-07	9.7589480e-07	9.8034875e-07
39	3.5047972e-04	3.5281859e-04	3.5473877e-04	3.5640449e-04	8.8072920e-05	8.8660659e-05	8.9143186e-05	8.9561769e-05	2.2024223e-05	2.2171198e-05	2.2291862e-05	2.2396536e-05	5.5060791e-06	5.5428230e-06	5.5729892e-06	5.5991579e-06	1.3765158e-06	1.3857017e-06	1.3932432e-06	1.3997854e-06
40	4.6884859e-04	4.7213454e-04	4.7479908e-04	4.7708643e-04	1.1802547e-04	1.1885266e-04	1.1952341e-04	1.2009922e-04	2.9517147e-05	2.9724019e-05	2.9891770e-05	3.0035774e-05	7.3793289e-06	7.4310473e-06	7.4729852e-06	7.5089864e-06	1.8448250e-06	1.8577545e-06	1.8682390e-06	1.8772392e-06
41	6.0206163e-04	6.0650266e-04	6.1005425e-04	6.1307713e-04	1.5186142e-04	1.5298160e-04	1.5387744e-04	1.5463992e-04	3.7983232e-05	3.8263410e-05	3.8487475e-05	3.8678185e-05	9.4958778e-06	9.5659230e-06	9.6219395e-06	9.6696173e-06	2.3739574e-06	2.3914686e-06	2.4054727e-06	2.4173921e-06
42	7.5251644e-04	7.5837671e-04	7.6299483e-04	7.6689259e-04	1.9024030e-04	1.9172181e-04	1.9288930e-04	1.9387467e-04	4.7588183e-05	4.7958779e-05	4.8250823e-05	4.8497313e-05	1.1897156e-05	1.1989806e-05	1.2062817e-05	1.2124440e-05	2.9742700e-06	2.9974323e-06	3.0156852e-06	3.0310908e-06
43	9.2273695e-04	9.3034750e-04	9.3626947e-04	9.4119647e-04	2.3387262e-04	2.3580155e-04	2.3730251e-04	2.3855128e-04	5.8510717e-05	5.8993302e-05	5.9368814e-05	5.9681235e-05	1.4627846e-05	1.4748493e-05	1.4842372e-05	1.4920478e-05	3.6569328e-06	3.6870945e-06	3.7105641e-06	3.7300904e-06
44	1.1140342e-03	1.1238020e-03	1.1313015e-03	1.1374585e-03	2.8317871e-04	2.8566162e-04	2.8756794e-04	2.8913300e-04	7.0857212e-05	7.1478489e-05	7.1955489e-05	7.2347099e-05	1.7714548e-05	1.7869869e-05	1.7989120e-05	1.8087024e-05	4.4285949e-06	4.4674249e-06	4.4972374e-06	4.5217132e-06
45	1.3295762e-03	1.3420480e-03	1.3514538e-03	1.3590809e-03	3.3908252e-04	3.4226322e-04	3.4466199e-04	3.4660713e-04	8.4860501e-05	8.5656521e-05	8.6256849e-05	8.6743649e-05	2.1215477e-05	2.1414485e-05	2.1564570e-05	2.1686272e-05	5.3038088e-06	5.3535603e-06	5.3910810e-06	5.4215062e-06
46	1.5716198e-03	1.5875038e-03	1.5992138e-03	1.6085785e-03	4.0230721e-04	4.0637323e-04	4.0937079e-04	4.1176800e-04	1.0070364e-04	1.0172142e-04	1.0247176e-04	1.0307182e-04	2.5176405e-05	2.5430857e-05	2.5618444e-05	2.5768462e-05	6.2940160e-06	6.3576281e-06	6.4045243e-06	6.4420282e-06
47	1.8437587e-03	1.8639357e-03	1.8784512e-03	1.8898900e-03	4.7396803e-04	4.7915486e-04	4.8288631e-04	4.8582684e-04	1.1866854e-04	1.1996718e-04	1.2090143e-04	1.2163766e-04	2.9667826e-05	2.9992494e-05	3.0226062e-05	3.0410123e-05	7.4168378e-06	7.4980034e-06	7.5563945e-06	7.6024091e-06
48	2.1494668e-03	2.1750396e-03	2.1929789e-03	2.2069379e-03	5.5520839e-04	5.6181385e-04	5.6644758e-04	5.7005320e-04	1.3904507e-04	1.4069933e-04	1.4185979e-04	1.4276278e-04	3.4762219e-05	3.5175795e-05	3.5465918e-05	3.5691670e-05	8.6903914e-06	8.7937834e-06	8.8663127e-06	8.9227497e-06
49	2.4920755e-03	2.5244643e-03	2.5465988e-03	2.5635931e-03	6.4720606e-04	6.5561761e-04	6.6136608e-04	6.6577959e-04	1.6213280e-04	1.6423999e-04	1.6568005e-04	1.6678569e-04	4.0534497e-05	4.1061312e-05	4.1421338e-05	4.1697756e-05	1.0133401e-05	1.0265102e-05	1.0355107e-05	1.0424210e-05
50	2.8774149e-03	2.9183715e-03	2.9457468e-03	2.9663923e-03	7.5190845e-04	7.6261099e-04	7.6976453e-04	7.7515947e-04	1.8842592e-04	1.9110794e-04	1.9290060e-04	1.9425255e-04	4.7108237e-05	4.7778768e-05	4.8226948e-05	4.8564949e-05	1.1776757e-05	1.1944386e-05	1.2056428e-05	1.2140926e-05
51	3.3064556e-03	3.3580918e-03	3.3920313e-03	3.4170522e-03	8.7006188e-04	8.8364947e-04	8.9258030e-04	8.9916431e-04	2.1811887e-04	2.2152519e-04	2.2376409e-04	2.2541466e-04	5.4532082e-05	5.5383699e-05	5.5943448e-05	5.6356108e-05	1.3632614e-05	1.3845512e-05	1.3985445e-05	1.4088607e-05
52	3.7839778e-03	3.8489713e-03	3.8910922e-03	3.9213943e-03	1.0035828e-03	1.0208203e-03	1.0319915e-03	1.0400282e-03	2.5170214e-04	2.5602537e-04	2.5882717e-04	2.6084280e-04	6.2928697e-05	6.4009558e-05	6.4710042e-05	6.5213975e-05	1.5731631e-05	1.6001837e-05	1.6176952e-05	1.6302931e-05
53	4.3151647e-03	4.3966717e-03	4.4489801e-03	4.4856744e-03	1.1546907e-03	1.1765010e-03	1.1904982e-03	1.2003172e-03	2.8974558e-04	2.9521843e-04	2.9873073e-04	3.0119460e-04	7.2440601e-05	7.3808895e-05	7.4687019e-05	7.5303022e-05	1.8109427e-05	1.8451487e-05	1.8671009e-05	1.8825004e-05
54	4.9037271e-03	5.0054437e-03	5.0704980e-03	5.1149562e-03	1.3254215e-03	1.3529143e-03	1.3704977e-03	1.3825143e-03	3.3277675e-04	3.3967944e-04	3.4409416e-04	3.4711118e-04	8.3199765e-05	8.4925553e-05	8.6029306e-05	8.6783612e-05	2.0798983e-05	2.1230410e-05	2.1506335e-05	2.1694903e-05
55	5.5553222e-03	5.6816388e-03	5.7625102e-03	5.8165645e-03	1.5186624e-03	1.5531937e-03	1.5753016e-03	1.5900785e-03	3.8154286e-04	3.9021836e-04	3.9577266e-04	3.9948514e-04	9.5393085e-05	9.7562128e-05	9.8950810e-05	9.9879002e-05	2.3847004e-05	2.4389236e-05	2.4736389e-05	2.4968424e-05
56	6.2708260e-03	6.4267376e-03	6.5271027e-03	6.5930705e-03	1.7362275e-03	1.7793953e-03	1.8071838e-03	1.8254486e-03	4.3652659e-04	4.4737995e-04	4.5436660e-04	4.5895877e-04	1.0914135e-04	1.1185493e-04	1.1360175e-04	1.1474989e-04	2.7283670e-05	2.7962024e-05	2.8398701e-05	2.8685720e-05
57	7.0552589e-03	7.2464678e-03	7.3709329e-03	7.4515962e-03	1.9815698e-03	2.0352736e-03	2.0702314e-03	2.0928868e-03	4.9863243e-04	5.1214618e-04	5.2094279e-04	5.2664368e-04	1.2467085e-04	1.2804963e-04	1.3024901e-04	1.3167438e-04	3.1165522e-05	3.2010158e-05	3.2559964e-05	3.2916281e-05
58	7.9113577e-03	8.1446875e-03	8.2985284e-03	8.3972582e-03	2.2579757e-03	2.3245702e-03	2.3684779e-03	2.3966563e-03	5.6873362e-04	5.8550729e-04	5.9656664e-04	6.0366415e-04	1.4220009e-04	1.4639400e-04	1.4915916e-04	1.5093375e-04	3.5547155e-05	3.6595548e-05	3.7286782e-05	3.7730393e-05
59	8.8416169e-03	9.1247404e-03	9.3140121e-03	9.4350637e-03	2.5692662e-03	2.6515385e-03	2.7065385e-03	2.7417146e-03	6.4785233e-04	6.6859765e-04	6.8246617e-04	6.9133599e-04	1.6198490e-04	1.6717192e-04	1.7063952e-04	1.7285727e-04	4.0492474e-05	4.1789112e-05	4.2655931e-05	4.3210318e-05
60	9.8447473e-03	1.0185687e-02	1.0417289e-02	1.0565567e-02	2.9186839e-03	3.0197628e-03	3.0884260e-03	3.1323861e-03	7.3688017e-04	7.6239956e-04	7.7973497e-04	7.9083358e-04	1.8424849e-04	1.9062932e-04	1.9496384e-04	1.9773892e-04	4.6057233e-05	4.7652272e-05	4.8735787e-05	4.9429483e-05
61	1.0925402e-02	1.1333363e-02	1.1615145e-02	1.1796536e-02	3.3124181e-03	3.4361059e-03	3.5215378e-03	3.5765329e-03	8.3748167e-04	8.6875377e-04	8.9035359e-04	9.0425807e-04	2.0940747e-04	2.1722688e-04	2.2262779e-04	2.2610452e-04	5.2345499e-05	5.4300113e-05	5.5650177e-05	5.6519254e-05
62	1.2075949e-02	1.2560942e-02	1.2901364e-02	1.3122957e-02	3.7533009e-03	3.9040406e-03	4.0098464e-03	4.0787194e-03	9.5049312e-04	9.8866673e-04	1.0154612e-03	1.0329027e-03	2.3767144e-04	2.4721677e-04	2.5391675e-04	2.5827801e-04	5.9409582e-05	6.1795583e-05	6.3470344e-05	6.4560508e-05
63	1.3291900e-02	1.3865318e-02	1.4274248e-02	1.4543867e-02	4.2462594e-03	4.4294446e-03	4.5600822e-03	4.6462153e-03	1.0773192e-03	1.1237951e-03	1.1569392e-03	1.1787920e-03	2.6939226e-04	2.8101394e-04	2.8930188e-04	2.9476636e-04	6.7337327e-05	7.0242284e-05	7.2313940e-05	7.3679841e-05
64	1.4569041e-02	1.5243383e-02	1.5731502e-02	1.6057816e-02	4.7975381e-03	5.0195969e-03	5.1803328e-03	5.2877869e-03	1.2197471e-03	1.2762042e-03	1.3170705e-03	1.3443900e-03	3.0501768e-04	3.1913572e-04	3.2935498e-04	3.3618669e-04	7.6240511e-05	7.9769378e-05	8.2323728e-05	8.4031344e-05
65	1.5894977e-02	1.6684567e-02	1.7262381e-02	1.7654893e-02	5.4112485e-03	5.6800545e-03	5.8767643e-03	6.0103899e-03	1.3790689e-03	1.4475747e-03	1.4977067e-03	1.5317614e-03	3.4487181e-04	3.6200346e-04	3.7454025e-04	3.8305653e-04	8.6199976e-05	9.0481995e-05	9.3615538e-05	9.5744164e-05
66	1.7257030e-02	1.8177363e-02	1.8856117e-02	1.9324937e-02	6.0923815e-03	6.4172935e-03	6.6569193e-03	6.8224304e-03	1.5568671e-03	1.6398962e-03	1.7011310e-03	1.7434262e-03	3.8935168e-04	4.1011615e-04	4.2543014e-04	4.3600761e-04	9.7314732e-05	1.0250461e-04	1.0633220e-04	1.0897594e-04
67	1.8642026e-02	1.9710980e-02	2.0502610e-02	2.1058264e-02	6.8470539e-03	7.2396711e-03	7.5304300e-03	7.7345169e-03	1.7551021e-03	1.8557414e-03	1.9302715e-03	1.9825850e-03	4.3894916e-04	4.6411896e-04	4.8275886e-04	4.9584240e-04	1.0970744e-04	1.1599818e-04	1.2065689e-04	1.2392688e-04
68	2.0030376e-02	2.1267054e-02	2.2184522e-02	2.2838810e-02	7.6791315e-03	8.1532421e-03	8.5049759e-03	8.7558133e-03	1.9752454e-03	2.0971973e-03	2.1876712e-03	2.2521922e-03	4.9403436e-04	5.2453611e-04	5.4716479e-04	5.6330232e-04	1.2347026e-04	1.3109333e-04	1.3674874e-04	1.4078187e-04
69	2.1399713e-02	2.2826254e-02	2.3882790e-02	2.4647557e-02	8.5913211e-03	9.1640333e-03	9.5881996e-03	9.8952299e-03	2.2185767e-03	2.3664708e-03	2.4760053e-03	2.5552911e-03	5.5492978e-04	5.9192235e-04	6.1932006e-04	6.3915173e-04	1.3868335e-04	1.4792822e-04	1.5477522e-04	1.5973139e-04
70	2.2733035e-02	2.4374670e-02	2.5585492e-02	2.6471560e-02	9.5899151e-03	1.0282438e-02	1.0793222e-02	1.1167009e-02	2.4874725e-03	2.6671020e-03	2.7995914e-03	2.8965459e-03	6.2223308e-04	6.6716679e-04	7.0030858e-04	7.2456144e-04	1.5549553e-04	1.6672443e-04	1.7500654e-04	1.8106731e-04
71	2.3999556e-02	2.5884100e-02	2.7264522e-02	2.8282596e-02	1.0671514e-02	1.1509485e-02	1.2123296e-02	1.2575988e-02	2.7818797e-03	3.0003244e-03	3.1603343e-03	3.2783432e-03	6.9593459e-04	7.5058223e-04	7.9061145e-04	8.2013338e-04	1.7390377e-04	1.8755941e-04	1.9756211e-04	2.0493921e-04
72	2.5177771e-02	2.7336452e-02	2.8903953e-02	3.0064790e-02	1.1837855e-02	1.2852804e-02	1.3589797e-02	1.4135589e-02	3.1033076e-03	3.3693777e-03	3.5625813e-03	3.7056613e-03	7.7641654e-04	8.4298462e-04	8.9132223e-04	9.2711943e-04	1.9400276e-04	2.1063609e-04	2.2271419e-04	2.3165881e-04
73	2.6243159e-02	2.8709398e-02	3.0481920e-02	3.1796921e-02	1.3085898e-02	1.4315664e-02	1.5199515e-02	1.5855228e-02	3.4521799e-03	3.7766036e-03	4.0097716e-03	4.1827546e-03	8.6379050e-04	9.4496647e-04	1.0033088e-03	1.0465919e-03	2.1581945e-04	2.3610140e-04	2.5067834e-04	2.6149269e-04
74	2.7172455e-02	2.9978513e-02	3.1976932e-02	3.3457016e-02	1.4408526e-02	1.5896473e-02	1.6956159e-02	1.7740991e-02	3.8279930e-03	4.2233040e-03	4.5048367e-03	4.7133475e-03	9.5793676e-04	1.0568614e-03	1.1273136e-03	1.1794924e-03	2.3932283e-04	2.6403734e-04	2.8163852e-04	2.9467444e-04
75	2.7950670e-02	3.1126931e-02	3.3374720e-02	3.5032623e-02	1.5801631e-02	1.7597299e-02	1.8868064e-02	1.9805342e-02	4.2313135e-03	4.7121520e-03	5.0524336e-03	5.3034154e-03	1.0590050e-03	1.1793483e-03	1.2645134e-03	1.3273286e-03	2.6454895e-04	2.9461179e-04	3.1588678e-04	3.3157859e-04
76	2.8557163e-02	3.2130613e-02	3.4653641e-02	3.6501750e-02	1.7248044e-02	1.9406348e-02	2.0930214e-02	2.2046440e-02	4.6592297e-03	5.2422541e-03	5.6538975e-03	5.9554248e-03	1.1662748e-03	1.3122145e-03	1.4152550e-03	1.4907318e-03	2.9131640e-04	3.2776976e-04	3.5350758e-04	3.7236046e-04
77	2.8978101e-02	3.2976074e-02	3.5803364e-02	3.7856365e-02	1.8735107e-02	2.1319902e-02	2.3147819e-02	2.4475139e-02	5.1103880e-03	5.8154445e-03	6.3140467e-03	6.6761006e-03	1.2794178e-03	1.4559332e-03	1.5807614e-03	1.6714039e-03	3.1954136e-04	3.6362700e-04	3.9480350e-04	4.1744194e-04
78	2.9193602e-02	3.3643689e-02	3.6805404e-02	3.9077774e-02	2.0231265e-02	2.3315190e-02	2.5506269e-02	2.7081029e-02	5.5780463e-03	6.4283282e-03	7.0324398e-03	7.4666235e-03	1.3967564e-03	1.6096690e-03	1.7609400e-03	1.8696607e-03	3.4880307e-04	4.0197240e-04	4.3974834e-04	4.6689846e-04
79	2.9200408e-02	3.4131669e-02	3.7656394e-02	4.0166634e-02	2.1720013e-02	2.5388012e-02	2.8009793e-02	2.9876974e-02	6.0600234e-03	7.0834186e-03	7.8149124e-03	8.3358679e-03	1.5177574e-03	1.7740709e-03	1.9572764e-03	2.0877519e-03	3.7896616e-04	4.4296461e-04	4.8870889e-04	5.2128707e-04
80	2.8990088e-02	3.4430762e-02	3.8343409e-02	4.1112326e-02	2.3162868e-02	2.7509927e-02	3.0636103e-02	3.2848447e-02	6.5474548e-03	7.7762393e-03	8.6599164e-03	9.2852804e-03	1.6402128e-03	1.9480375e-03	2.1694088e-03	2.3260697e-03	4.0947721e-04	4.8632527e-04	5.4159036e-04	5.8070057e-04
81	2.8558580e-02	3.4535402e-02	3.8856928e-02	4.1908134e-02	2.4515742e-02	2.9646467e-02	3.3356225e-02	3.5975493e-02	7.0293374e-03	8.5004575e-03	9.5641471e-03	1.0315163e-02	1.7613775e-03	2.1300037e-03	2.3965379e-03	2.5847240e-03	4.3964896e-04	5.3165997e-04	5.9818829e-04	6.4516050e-04
82	2.7906402e-02	3.4443876e-02	3.9195937e-02	4.2556503e-02	2.5743979e-02	3.1774874e-02	3.6158706e-02	3.9258866e-02	7.4975015e-03	9.2538984e-03	1.0530616e-02	1.1433485e-02	1.8792183e-03	2.3194520e-03	2.6394560e-03	2.8657566e-03	4.6897152e-04	5.7883480e-04	6.5869395e-04	7.1516878e-04
83	2.7030955e-02	3.4145814e-02	3.9350785e-02	4.3048832e-02	2.6783458e-02	3.3833173e-02	3.8990486e-02	4.2654674e-02	7.9331798e-03	1.0021284e-02	1.1548865e-02	1.2634187e-02	1.9890379e-03	2.5125756e-03	2.8955767e-03	3.1676928e-03	4.9627152e-04	6.2689590e-04	7.2245593e-04	7.9034978e-04
84	2.5948243e-02	3.3645697e-02	3.9327663e-02	4.3388971e-02	2.7600725e-02	3.5788383e-02	4.1832198e-02	4.6152145e-02	8.3265316e-03	1.0796568e-02	1.2619854e-02	1.3923087e-02	2.0883781e-03	2.7078881e-03	3.1651866e-03	3.4920506e-03	5.2093402e-04	6.7546726e-04	7.8953777e-04	8.7107213e-04
85	2.4674208e-02	3.2944058e-02	3.9126788e-02	4.3573082e-02	2.8143861e-02	3.7576606e-02	4.4628743e-02	4.9700270e-02	8.6596353e-03	1.1562014e-02	1.3731898e-02	1.5292365e-02	2.1727432e-03	2.9009635e-03	3.4453978e-03	3.8369263e-03	5.4183775e-04	7.2344102e-04	8.5921180e-04	9.5685101e-04
86	2.3229585e-02	3.2047495e-02	3.8754487e-02	4.3603961e-02	2.8378833e-02	3.9151389e-02	4.7345104e-02	5.3269550e-02	8.9192430e-03	1.2304972e-02	1.4880192e-02	1.6742199e-02	2.2388069e-03	3.0886540e-03	3.7350565e-03	4.2024361e-03	5.5815357e-04	7.7002769e-04	9.3118130e-04	1.0477030e-03
87	2.1633366e-02	3.0954380e-02	3.8205886e-02	4.3476975e-02	2.8260175e-02	4.0436435e-02	4.9909247e-02	5.6794994e-02	9.0855163e-03	1.3000128e-02	1.6045593e-02	1.8259329e-02	2.2815742e-03	3.2646198e-03	4.0294036e-03	4.5853217e-03	5.6863881e-04	8.1364415e-04	1.0042519e-03	1.1428039e-03
88	1.9908177e-02	2.9670481e-02	3.7480094e-02	4.3193321e-02	2.7758264e-02	4.1369988e-02	5.2259046e-02	6.0225082e-02	9.1419345e-03	1.3624833e-02	1.7211046e-02	1.9834589e-02	2.2968734e-03	3.4231832e-03	4.3242045e-03	4.9833587e-03	5.7225769e-04	8.5287371e-04	1.0773599e-03	1.2415858e-03
89	1.8081176e-02	2.8211876e-02	3.6580829e-02	3.1820673e-02	2.6858684e-02	4.1907333e-02	5.4338995e-02	6.3515571e-02	9.0750418e-03	1.4159696e-02	1.8360119e-02	2.1460711e-02	2.2812906e-03	3.5594746e-03	4.6153801e-03	5.3948091e-03	5.6816533e-04	8.8650260e-04	1.1494805e-03	1.3436006e-03
90	1.6184013e-02	2.6597112e-02	3.5511446e-02	0.0000000e+00	2.5554472e-02	4.1996703e-02	5.6072390e-02	6.6595698e-02	8.8704735e-03	1.4577904e-02	1.9463859e-02	2.3116712e-02	2.2311615e-03	3.6667331e-03	4.8956817e-03	5.8144719e-03	5.5545823e-04	9.1285056e-04	1.2188031e-03	1.4475403e-03
91	1.4255625e-02	2.4846824e-02	1.7794493e-02	0.0000000e+00	2.3876307e-02	4.1615178e-02	5.7412227e-02	6.9427623e-02	8.5269168e-03	1.4861978e-02	2.0503560e-02	2.4794604e-02	2.1460985e-03	3.7405396e-03	5.1604419e-03	6.2404341e-03	5.3404973e-04	9.3082126e-04	1.2841594e-03	1.5529120e-03
92	1.2338331e-02	2.2979573e-02	0.0000000e+00	0.0000000e+00	2.1867545e-02	4.0727295e-02	5.8275173e-02	7.1926965e-02	8.0453323e-03	1.4984060e-02	2.1440135e-02	2.6462794e-02	2.0262656e-03	3.7738263e-03	5.3998279e-03	6.6648148e-03	5.0399395e-04	9.3866549e-04	1.3431016e-03	1.6577423e-03
93	1.0477233e-02	2.1017091e-02	0.0000000e+00	0.0000000e+00	1.9607746e-02	3.9332692e-02	5.8620129e-02	3.7324981e-02	7.4425180e-03	1.4929522e-02	2.2250460e-02	2.8107037e-02	1.8758202e-03	3.7628526e-03	5.6080296e-03	7.0841276e-03	4.6633752e-04	9.3546246e-04	1.3941819e-03	1.7611467e-03
94	8.7140611e-03	1.8983001e-02	0.0000000e+00	0.0000000e+00	1.7178432e-02	3.7422068e-02	5.8389273e-02	0.0000000e+00	6.7354638e-03	1.4672759e-02	2.2893757e-02	2.9685109e-02	1.6989535e-03	3.7010570e-03	5.7747217e-03	7.4877725e-03	4.2213799e-04	9.1959945e-04	1.4348417e-03	1.8604824e-03
95	7.0878527e-03	1.6907736e-02	0.0000000e+00	0.0000000e+00	1.4681893e-02	3.5022959e-02	1.8686694e-02	0.0000000e+00	5.9533036e-03	1.4201323e-02	2.3338723e-02	3.1160969e-02	1.5029312e-03	3.5851710e-03	5.8919378e-03	7.8666899e-03	3.7321487e-04	8.9028634e-04	1.4631134e-03	1.9534930e-03
96	5.6284281e-03	1.1128799e-02	0.0000000e+00	0.0000000e+00	1.2222464e-02	3.2199262e-02	0.0000000e+00	0.0000000e+00	5.1315111e-03	1.3518622e-02	2.3562264e-02	3.2506458e-02	1.2966418e-03	3.4159159e-03	5.9537662e-03	8.2138055e-03	3.2178689e-04	8.4772597e-04	1.4775429e-03	2.0384156e-03
97	4.3614727e-03	0.0000000e+00	0.0000000e+00	0.0000000e+00	9.9039122e-03	2.9027510e-02	0.0000000e+00	0.0000000e+00	4.3092397e-03	1.2630009e-02	2.3522809e-02	3.3657914e-02	1.0899193e-03	3.1944591e-03	5.9495328e-03	8.5129655e-03	2.7030472e-04	7.9223977e-04	1.4755100e-03	2.1112525e-03
98	3.5273465e-03	0.0000000e+00	0.0000000e+00	0.0000000e+00	7.8140775e-03	2.5628508e-02	0.0000000e+00	0.0000000e+00	3.5273465e-03	1.1568944e-02	2.3207039e-02	3.4586995e-02	8.9307876e-04	2.9291079e-03	5.8757239e-03	8.7569823e-03	2.2132981e-04	7.2591461e-04	1.4561682e-03	2.1702244e-03
99	2.8140579e-03	0.0000000e+00	0.0000000e+00	0.0000000e+00	6.0034837e-03	2.2120881e-02	0.0000000e+00	0.0000000e+00	2.8140579e-03	1.0368887e-02	2.2587928e-02	3.5243715e-02	7.1326561e-04	2.6281514e-03	5.7252524e-03	8.9330534e-03	1.7663324e-04	6.5083593e-04	1.4178027e-03	2.2121831e-03
100	2.1907765e-03	0.0000000e+00	0.0000000e+00	0.0000000e+00	4.4972234e-03	1.8638772e-02	0.0000000e+00	0.0000000e+00	2.1907765e-03	9.0796877e-03	2.1659164e-02	3.5595079e-02	5.5593376e-04	2.3040711e-03	5.4962522e-03	9.0326448e-03	1.3756066e-04	5.7012108e-04	1.3599967e-03	2.2350444e-03
101	1.6654502e-03	0.0000000e+00	0.0000000e+00	0.0000000e+00	3.2873891e-03	1.5304004e-02	0.0000000e+00	0.0000000e+00	1.6654502e-03	7.7532822e-03	2.0425502e-02	3.5600601e-02	4.2314927e-04	1.9699153e-03	5.1896096e-03	9.0452232e-03	1.0461497e-04	4.8702112e-04	1.2830245e-03	2.2362458e-03
102	1.2352588e-03	0.0000000e+00	0.0000000e+00	0.0000000e+00	2.3427234e-03	1.2242110e-02	0.0000000e+00	0.0000000e+00	1.2352588e-03	6.4549550e-03	1.8918915e-02	3.5235607e-02	3.1426073e-04	1.6421975e-03	4.8131388e-03	8.9642492e-03	7.7624049e-05	4.0563139e-04	1.1888705e-03	2.2142166e-03
103	8.9124469e-04	0.0000000e+00	0.0000000e+00	0.0000000e+00	1.6231736e-03	2.2023729e-03	0.0000000e+00	0.0000000e+00	8.9124469e-04	5.2378072e-03	1.7178891e-02	3.4460465e-02	2.2705534e-04	1.3343946e-03	4.3765298e-03	8.7792192e-03	5.6030083e-05	3.2928641e-04	1.0799892e-03	2.1664339e-03
104	6.2422281e-04	0.0000000e+00	0.0000000e+00	0.0000000e+00	1.0912204e-03	0.0000000e+00	0.0000000e+00	0.0000000e+00	6.2422281e-04	4.1430575e-03	1.5265817e-02	3.3255564e-02	1.5926124e-04	1.0570400e-03	3.8948480e-03	8.4846666e-03	3.9260871e-05	2.6058010e-04	9.6015278e-04	2.0916288e-03
105	4.2355103e-04	0.0000000e+00	0.0000000e+00	0.0000000e+00	7.1038552e-04	0.0000000e+00	0.0000000e+00	0.0000000e+00	4.2355103e-04	3.1985604e-03	1.3256455e-02	3.1622643e-02	1.0822976e-04	8.1732639e-04	3.3874146e-03	8.0805166e-03	2.6652168e-05	2.0127107e-04	8.3416928e-04	1.9898712e-03
106	2.7754048e-04	0.0000000e+00	0.0000000e+00	0.0000000e+00	4.4641757e-04	0.0000000e+00	0.0000000e+00	0.0000000e+00	2.7754048e-04	2.4123719e-03	1.1230477e-02	2.9585939e-02	7.1035387e-05	6.1743705e-04	2.8743962e-03	7.5724040e-03	1.7473133e-05	1.5187585e-04	7.0703784e-04	1.8626438e-03
107	1.7466093e-04	0.0000000e+00	0.0000000e+00	0.0000000e+00	2.6934478e-04	0.0000000e+00	0.0000000e+00	0.0000000e+00	1.7466093e-04	1.7751660e-03	9.2762885e-03	2.7187999e-02	4.4780450e-05	4.5512602e-04	2.3783016e-03	6.9705964e-03	1.1001931e-05	1.1181811e-04	5.8431549e-04	1.7125782e-03
108	1.0596433e-04	0.0000000e+00	0.0000000e+00	0.0000000e+00	1.5658936e-04	0.0000000e+00	0.0000000e+00	0.0000000e+00	1.0596433e-04	1.2715720e-03	7.4729744e-03	2.4509763e-02	2.7216927e-05	3.2660313e-04	1.9194327e-03	6.2953301e-03	6.6784288e-06	8.0141146e-05	4.7098611e-04	1.5447340e-03
109	6.0828000e-05	0.0000000e+00	0.0000000e+00	0.0000000e+00	8.6133020e-05	0.0000000e+00	0.0000000e+00	0.0000000e+00	6.0828000e-05	8.8428705e-04	5.8691417e-03	2.1625875e-02	1.5653325e-05	2.2756022e-04	1.5103502e-03	5.5651484e-03	3.8359295e-06	5.5764825e-05	3.7011925e-04	1.3637688e-03
110	3.3290155e-05	0.0000000e+00	0.0000000e+00	0.0000000e+00	4.5159216e-05	0.0000000e+00	0.0000000e+00	0.0000000e+00	3.3290155e-05	5.9597497e-04	4.5006666e-03	1.8653042e-02	8.5839041e-06	1.5367282e-04	1.1605020e-03	4.8097080e-03	2.1006223e-06	3.7606263e-05	2.8399389e-04	1.1770145e-03
111	1.7317200e-05	0.0000000e+00	0.0000000e+00	0.0000000e+00	2.2504016e-05	0.0000000e+00	0.0000000e+00	0.0000000e+00	1.7317200e-05	3.8790528e-04	3.3716588e-03	1.5696310e-02	4.4745888e-06	1.0023079e-04	8.7120244e-04	4.0557673e-03	1.0934197e-06	2.4492601e-05	2.1288882e-04	9.9107562e-04
112	8.3021400e-06	0.0000000e+00	0.0000000e+00	0.0000000e+00	1.0332779e-05	0.0000000e+00	0.0000000e+00	0.0000000e+00	8.3021400e-06	2.4260698e-04	2.4657356e-03	1.2884921e-02	2.1499051e-06	6.2825003e-05	6.3852180e-04	3.3366526e-03	5.2455422e-07	1.5328640e-05	1.5579260e-04	8.1410815e-04
113	3.9260400e-06	0.0000000e+00	0.0000000e+00	0.0000000e+00	4.6799522e-06	0.0000000e+00	0.0000000e+00	0.0000000e+00	3.9260400e-06	1.4624499e-04	1.7549399e-03	1.0313707e-02	1.0190166e-06	3.7958367e-05	4.5550040e-04	2.6769565e-03	2.4823269e-07	9.2466677e-06	1.1096001e-04	6.5210728e-04
114	1.0434000e-06	0.0000000e+00	0.0000000e+00	0.0000000e+00	1.1910415e-06	0.0000000e+00	0.0000000e+00	0.0000000e+00	1.0434000e-06	8.3472000e-05	1.2134742e-03	8.0540046e-03	2.7147202e-07	2.1717762e-05	3.1572196e-04	2.0954925e-03	6.6019746e-08	5.2815797e-06	7.6780965e-05	5.0960642e-04
115	0.0000000e+00	0.0000000e+00	0.0000000e+00	0.0000000e+00	0.0000000e+00	0.0000000e+00	0.0000000e+00	0.0000000e+00	0.0000000e+00	4.5410575e-05	8.1296005e-04	6.1392882e-03	0.0000000e+00	1.1844598e-05	2.1204719e-04	1.6013319e-03	0.0000000e+00	2.8754830e-06	5.1478158e-05	3.8875127e-04
116	0.0000000e+00	0.0000000e+00	0.0000000e+00	0.0000000e+00	0.0000000e+00	0.0000000e+00	0.0000000e+00	0.0000000e+00	0.0000000e+00	2.3488700e-05	5.2614688e-04	4.5732499e-03	0.0000000e+00	6.1427079e-06	1.3759666e-04	1.1959852e-03	0.0000000e+00	1.4885303e-06	3.3343078e-05	2.8981684e-04
117	0.0000000e+00	0.0000000e+00	0.0000000e+00	0.0000000e+00	0.0000000e+00	0.0000000e+00	0.0000000e+00	0.0000000e+00	0.0000000e+00	1.1199465e-05	3.2727325e-04	3.3262411e-03	0.0000000e+00	2.9369158e-06	8.5823205e-05	8.7226398e-04	0.0000000e+00	7.1032497e-07	2.0757274e-05	2.1096652e-04
118	0.0000000e+00	0.0000000e+00	0.0000000e+00	0.0000000e+00	0.0000000e+00	0.0000000e+00	0.0000000e+00	0.0000000e+00	0.0000000e+00	5.2684800e-06	1.9625088e-04	2.3550106e-03	0.0000000e+00	1.3855553e-06	5.1611937e-05	6.1934324e-04	0.0000000e+00	3.3444211e-07	1.2457969e-05	1.4949562e-04
119	0.0000000e+00	0.0000000e+00	0.0000000e+00	0.0000000e+00	0.0000000e+00	0.0000000e+00	0.0000000e+00	0.0000000e+00	0.0000000e+00	1.3933900e-06	1.1147120e-04	1.6205126e-03	0.0000000e+00	3.6755292e-07	2.9404234e-05	4.2746405e-04	0.0000000e+00	8.8532504e-08	7.0826003e-06	1.0296330e-04
120	0.0000000e+00	0.0000000e+00	0.0000000e+00	0.0000000e+00	0.0000000e+00	0.0000000e+00	0.0000000e+00	0.0000000e+00	0.0000000e+00	0.0000000e+00	6.0374140e-05	1.0808444e-03	0.0000000e+00	0.0000000e+00	1.5975718e-05	2.8600432e-04	0.0000000e+00	0.0000000e+00	3.8396419e-06	6.8738954e-05
