# Supplementary material for: Quantifying the Potential for Future Gene Therapy to Lower Lifetime Risk of Polygenic Late-Onset Diseases
Source: MDPI journal article supplement (doi:10.3390/ijms20133352), 2019-07-08
Supplement: s2 [file s2 › SuppFiles/Results/LODsCommonLow/CAD/EnvironmentArray.csv]

Age	Env	Incidence	CasesExpected
0	0	-0.00036862	0
1	0	-0.000367254	0
2	0	-0.000365745	0
3	0	-0.000364079	0
4	0	-0.000362238	0
5	0	-0.000360205	0
6	0	-0.000357959	0
7	0	-0.000355479	0
8	0	-0.00035274	0
9	0	-0.000349714	0
10	0	-0.000346373	0
11	0	-0.000342682	0
12	0	-0.000338606	0
13	0	-0.000334105	0
14	0	-0.000329134	0
15	0	-0.000323643	0
16	0	-0.000317581	0
17	0	-0.000310885	0
18	0	-0.000303492	0
19	0	-0.000295328	0
20	0	-0.000286314	0
21	0	-0.000276361	0
22	0	-0.000265372	0
23	0	-0.00025324	0
24	0	-0.000239846	0
25	0	-0.000225061	0
26	0	-0.000208741	0
27	0	-0.000190727	0
28	0	-0.000170847	0
29	0	-0.000148908	0
30	0	-0.0001247	0
31	0	-9.799e-05	0
32	0	-6.85246e-05	0
33	0	-3.60234e-05	0
34	0	-1.79013e-07	0
35	4.60463e-06	3.9346e-05	983
36	9.87604e-06	8.29217e-05	2072
37	1.58715e-05	0.000130954	3273
38	2.26813e-05	0.000183885	4595
39	3.04448e-05	0.000242203	6052
40	3.92407e-05	0.000306437	7655
41	4.92486e-05	0.000377168	9419
42	6.06643e-05	0.000455025	11360
43	7.3611e-05	0.000540698	13492
44	8.83485e-05	0.000634933	15835
45	0.000105089	0.000738541	18408
46	0.000124153	0.0008524	21230
47	0.000145878	0.000977459	24324
48	0.000170623	0.00111474	27713
49	0.000198963	0.00126534	31423
50	0.000231172	0.00143045	35478
51	0.000267858	0.00161131	39906
52	0.000309726	0.00180927	44737
53	0.000357467	0.00202575	49999
54	0.00041204	0.00226224	55723
55	0.000474153	0.00252031	61939
56	0.000545019	0.0028016	68679
57	0.000625883	0.00310781	75972
58	0.000718204	0.00344066	83848
59	0.000823339	0.00380192	92333
60	0.000943636	0.00419338	101453
61	0.00108064	0.00461678	111228
62	0.00123672	0.00507384	121676
63	0.00141479	0.00556622	132806
64	0.00161742	0.00609542	144624
65	0.00184776	0.00666283	157123
66	0.00210984	0.00726962	170291
67	0.0024075	0.00791672	184101
68	0.00274488	0.00860475	198516
69	0.00312807	0.009334	213486
70	0.00356092	0.0101043	228950
71	0.00405039	0.0109152	244826
72	0.00460306	0.0117656	261017
73	0.00522518	0.0126539	277422
74	0.00592567	0.0135781	293919
75	0.0067103	0.0145355	310374
76	0.00759023	0.015523	326639
77	0.00857139	0.0165369	342570
78	0.00966881	0.0175731	358016
79	0.0108901	0.018627	372823
80	0.0122425	0.0196938	386827
81	0.0137444	0.0207683	399893
82	0.015399	0.0218454	411901
83	0.017226	0.0229196	422713
84	0.0192306	0.0239857	432238
85	0.0214307	0.0250386	440386
86	0.0238318	0.0260734	447110
87	0.026447	0.0270857	452358
88	0.0292937	0.0280713	456128
89	0.0323734	0.0290266	458417
90	0.0357096	0.0299485	459254
91	0.039304	0.0308344	458678
92	0.0431901	0.0316822	456759
93	0.0473628	0.0324904	453563
94	0.0518287	0.033258	449191
95	0.0566142	0.0339846	443736
96	0.0617016	0.0346699	437312
97	0.0671364	0.0353143	430009
98	0.0729125	0.0359185	421913
99	0.0790466	0.0364833	413154
100	0.0855393	0.03701	403820
101	0.0924249	0.0375	394016
102	0.0996918	0.0379548	383825
103	0.107347	0.0383761	373354
104	0.115409	0.0387655	362682
105	0.123902	0.0391248	351843
106	0.132822	0.0394558	340940
107	0.142234	0.0397604	330007
108	0.15207	0.0400401	319106
109	0.162391	0.0402967	308298
110	0.173172	0.0405318	297605
111	0.184492	0.040747	287057
112	0.196302	0.0409438	276687
113	0.20868	0.0411236	266527
114	0.221515	0.0412877	256592
115	0.234887	0.0414374	246892
116	0.248877	0.0415738	237440
117	0.263424	0.0416981	228256
118	0.278678	0.0418112	219337
119	0.294508	0.0419142	210681
