# Supplementary material for: Quantifying the Potential for Future Gene Therapy to Lower Lifetime Risk of Polygenic Late-Onset Diseases
Source: MDPI journal article supplement (doi:10.3390/ijms20133352), 2019-07-08
Supplement: s2 [file s2 › SuppFiles/Results/LODsCommonLow/CAD/EnvironmentArraySD.csv]

Age	Env	EnvSD	Incidence	CasesExpected
0	0	0	-0.00036862	0
1	0	0	-0.000367254	0
2	0	0	-0.000365745	0
3	0	0	-0.000364079	0
4	0	0	-0.000362238	0
5	0	0	-0.000360205	0
6	0	0	-0.000357959	0
7	0	0	-0.000355479	0
8	0	0	-0.00035274	0
9	0	0	-0.000349714	0
10	0	0	-0.000346373	0
11	0	0	-0.000342682	0
12	0	0	-0.000338606	0
13	0	0	-0.000334105	0
14	0	0	-0.000329134	0
15	0	0	-0.000323643	0
16	0	0	-0.000317581	0
17	0	0	-0.000310885	0
18	0	0	-0.000303492	0
19	0	0	-0.000295328	0
20	0	0	-0.000286314	0
21	0	0	-0.000276361	0
22	0	0	-0.000265372	0
23	0	0	-0.00025324	0
24	0	0	-0.000239846	0
25	0	0	-0.000225061	0
26	0	0	-0.000208741	0
27	0	0	-0.000190727	0
28	0	0	-0.000170847	0
29	0	0	-0.000148908	0
30	0	0	-0.0001247	0
31	0	0	-9.799e-05	0
32	0	0	-6.85246e-05	0
33	0	0	-3.60234e-05	0
34	0	0	-1.79013e-07	0
35	4.60463e-06	5.745e-09	3.9346e-05	983
36	9.87604e-06	1.289e-08	8.29217e-05	2072
37	1.58715e-05	1.134e-08	0.000130954	3273
38	2.26813e-05	1.375e-08	0.000183885	4595
39	3.04448e-05	2.246e-08	0.000242203	6052
40	3.92407e-05	2.497e-08	0.000306437	7655
41	4.92486e-05	2.659e-08	0.000377168	9419
42	6.06643e-05	1.894e-08	0.000455025	11360
43	7.3611e-05	2.743e-08	0.000540698	13492
44	8.83485e-05	4.771e-08	0.000634933	15835
45	0.000105089	5.621e-08	0.000738541	18408
46	0.000124153	3.98e-08	0.0008524	21230
47	0.000145878	5.254e-08	0.000977459	24324
48	0.000170623	6.173e-08	0.00111474	27713
49	0.000198963	3.832e-08	0.00126534	31423
50	0.000231172	7.819e-08	0.00143045	35478
51	0.000267858	7.425e-08	0.00161131	39906
52	0.000309726	9.79e-08	0.00180927	44737
53	0.000357467	6.85e-08	0.00202575	49999
54	0.00041204	7.624e-08	0.00226224	55723
55	0.000474153	1.324e-07	0.00252031	61939
56	0.000545019	9.331e-08	0.0028016	68679
57	0.000625883	8.023e-08	0.00310781	75972
58	0.000718204	1.274e-07	0.00344066	83848
59	0.000823339	1.149e-07	0.00380192	92333
60	0.000943636	1.828e-07	0.00419338	101453
61	0.00108064	2.112e-07	0.00461678	111228
62	0.00123672	1.994e-07	0.00507384	121676
63	0.00141479	1.559e-07	0.00556622	132806
64	0.00161742	2.339e-07	0.00609542	144624
65	0.00184776	3.476e-07	0.00666283	157123
66	0.00210984	2.107e-07	0.00726962	170291
67	0.0024075	2.531e-07	0.00791672	184101
68	0.00274488	2.786e-07	0.00860475	198516
69	0.00312807	3.197e-07	0.009334	213486
70	0.00356092	2.477e-07	0.0101043	228950
71	0.00405039	3.719e-07	0.0109152	244826
72	0.00460306	6.029e-07	0.0117656	261017
73	0.00522518	4.632e-07	0.0126539	277422
74	0.00592567	6.21e-07	0.0135781	293919
75	0.0067103	4.461e-07	0.0145355	310374
76	0.00759023	8.096e-07	0.015523	326639
77	0.00857139	6.462e-07	0.0165369	342570
78	0.00966881	7.81e-07	0.0175731	358016
79	0.0108901	9.083e-07	0.018627	372823
80	0.0122425	1.04e-06	0.0196938	386827
81	0.0137444	1.223e-06	0.0207683	399893
82	0.015399	7.576e-07	0.0218454	411901
83	0.017226	6.732e-07	0.0229196	422713
84	0.0192306	1.506e-06	0.0239857	432238
85	0.0214307	2.387e-06	0.0250386	440386
86	0.0238318	1.892e-06	0.0260734	447110
87	0.026447	2.48e-06	0.0270857	452358
88	0.0292937	1.498e-06	0.0280713	456128
89	0.0323734	2.442e-06	0.0290266	458417
90	0.0357096	2.702e-06	0.0299485	459254
91	0.039304	3.966e-06	0.0308344	458678
92	0.0431901	4.499e-06	0.0316822	456759
93	0.0473628	4.067e-06	0.0324904	453563
94	0.0518287	3.869e-06	0.033258	449191
95	0.0566142	4.699e-06	0.0339846	443736
96	0.0617016	6.553e-06	0.0346699	437312
97	0.0671364	3.717e-06	0.0353143	430009
98	0.0729125	9.081e-06	0.0359185	421913
99	0.0790466	4.935e-06	0.0364833	413154
100	0.0855393	9.621e-06	0.03701	403820
101	0.0924249	7.686e-06	0.0375	394016
102	0.0996918	8.592e-06	0.0379548	383825
103	0.107347	9.934e-06	0.0383761	373354
104	0.115409	9.897e-06	0.0387655	362682
105	0.123902	1.039e-05	0.0391248	351843
106	0.132822	7.562e-06	0.0394558	340940
107	0.142234	1.727e-05	0.0397604	330007
108	0.15207	1.634e-05	0.0400401	319106
109	0.162391	1.419e-05	0.0402967	308298
110	0.173172	1.164e-05	0.0405318	297605
111	0.184492	9.812e-06	0.040747	287057
112	0.196302	1.663e-05	0.0409438	276687
113	0.20868	1.941e-05	0.0411236	266527
114	0.221515	2.522e-05	0.0412877	256592
115	0.234887	2.454e-05	0.0414374	246892
116	0.248877	2.336e-05	0.0415738	237440
117	0.263424	3.339e-05	0.0416981	228256
118	0.278678	4.888e-05	0.0418112	219337
119	0.294508	4.281e-05	0.0419142	210681
