# Supplementary material for: Quantifying the Potential for Future Gene Therapy to Lower Lifetime Risk of Polygenic Late-Onset Diseases
Source: MDPI journal article supplement (doi:10.3390/ijms20133352), 2019-07-08
Supplement: s2 [file s2 › SuppFiles/Results/LODsCommonLow/CAD/LifetimeRiskPostAnalysis.csv]

age	A..1..	A..2..	A..3..	A..4..	A..5..	A..6..	A..7..	A..8..	A..9..	A..10..	A..11..	A..12..	A..13..	A..14..	A..15..	A..16..	A..17..	A..18..	A..19..	A..20..
1	0.0000000e+00	0.0000000e+00	0.0000000e+00	0.0000000e+00	0.0000000e+00	0.0000000e+00	0.0000000e+00	0.0000000e+00	0.0000000e+00	0.0000000e+00	0.0000000e+00	0.0000000e+00	0.0000000e+00	0.0000000e+00	0.0000000e+00	0.0000000e+00	0.0000000e+00	0.0000000e+00	0.0000000e+00	0.0000000e+00
2	0.0000000e+00	0.0000000e+00	0.0000000e+00	0.0000000e+00	0.0000000e+00	0.0000000e+00	0.0000000e+00	0.0000000e+00	0.0000000e+00	0.0000000e+00	0.0000000e+00	0.0000000e+00	0.0000000e+00	0.0000000e+00	0.0000000e+00	0.0000000e+00	0.0000000e+00	0.0000000e+00	0.0000000e+00	0.0000000e+00
3	0.0000000e+00	0.0000000e+00	0.0000000e+00	0.0000000e+00	0.0000000e+00	0.0000000e+00	0.0000000e+00	0.0000000e+00	0.0000000e+00	0.0000000e+00	0.0000000e+00	0.0000000e+00	0.0000000e+00	0.0000000e+00	0.0000000e+00	0.0000000e+00	0.0000000e+00	0.0000000e+00	0.0000000e+00	0.0000000e+00
4	0.0000000e+00	0.0000000e+00	0.0000000e+00	0.0000000e+00	0.0000000e+00	0.0000000e+00	0.0000000e+00	0.0000000e+00	0.0000000e+00	0.0000000e+00	0.0000000e+00	0.0000000e+00	0.0000000e+00	0.0000000e+00	0.0000000e+00	0.0000000e+00	0.0000000e+00	0.0000000e+00	0.0000000e+00	0.0000000e+00
5	0.0000000e+00	0.0000000e+00	0.0000000e+00	0.0000000e+00	0.0000000e+00	0.0000000e+00	0.0000000e+00	0.0000000e+00	0.0000000e+00	0.0000000e+00	0.0000000e+00	0.0000000e+00	0.0000000e+00	0.0000000e+00	0.0000000e+00	0.0000000e+00	0.0000000e+00	0.0000000e+00	0.0000000e+00	0.0000000e+00
6	0.0000000e+00	0.0000000e+00	0.0000000e+00	0.0000000e+00	0.0000000e+00	0.0000000e+00	0.0000000e+00	0.0000000e+00	0.0000000e+00	0.0000000e+00	0.0000000e+00	0.0000000e+00	0.0000000e+00	0.0000000e+00	0.0000000e+00	0.0000000e+00	0.0000000e+00	0.0000000e+00	0.0000000e+00	0.0000000e+00
7	0.0000000e+00	0.0000000e+00	0.0000000e+00	0.0000000e+00	0.0000000e+00	0.0000000e+00	0.0000000e+00	0.0000000e+00	0.0000000e+00	0.0000000e+00	0.0000000e+00	0.0000000e+00	0.0000000e+00	0.0000000e+00	0.0000000e+00	0.0000000e+00	0.0000000e+00	0.0000000e+00	0.0000000e+00	0.0000000e+00
8	0.0000000e+00	0.0000000e+00	0.0000000e+00	0.0000000e+00	0.0000000e+00	0.0000000e+00	0.0000000e+00	0.0000000e+00	0.0000000e+00	0.0000000e+00	0.0000000e+00	0.0000000e+00	0.0000000e+00	0.0000000e+00	0.0000000e+00	0.0000000e+00	0.0000000e+00	0.0000000e+00	0.0000000e+00	0.0000000e+00
9	0.0000000e+00	0.0000000e+00	0.0000000e+00	0.0000000e+00	0.0000000e+00	0.0000000e+00	0.0000000e+00	0.0000000e+00	0.0000000e+00	0.0000000e+00	0.0000000e+00	0.0000000e+00	0.0000000e+00	0.0000000e+00	0.0000000e+00	0.0000000e+00	0.0000000e+00	0.0000000e+00	0.0000000e+00	0.0000000e+00
10	0.0000000e+00	0.0000000e+00	0.0000000e+00	0.0000000e+00	0.0000000e+00	0.0000000e+00	0.0000000e+00	0.0000000e+00	0.0000000e+00	0.0000000e+00	0.0000000e+00	0.0000000e+00	0.0000000e+00	0.0000000e+00	0.0000000e+00	0.0000000e+00	0.0000000e+00	0.0000000e+00	0.0000000e+00	0.0000000e+00
11	0.0000000e+00	0.0000000e+00	0.0000000e+00	0.0000000e+00	0.0000000e+00	0.0000000e+00	0.0000000e+00	0.0000000e+00	0.0000000e+00	0.0000000e+00	0.0000000e+00	0.0000000e+00	0.0000000e+00	0.0000000e+00	0.0000000e+00	0.0000000e+00	0.0000000e+00	0.0000000e+00	0.0000000e+00	0.0000000e+00
12	0.0000000e+00	0.0000000e+00	0.0000000e+00	0.0000000e+00	0.0000000e+00	0.0000000e+00	0.0000000e+00	0.0000000e+00	0.0000000e+00	0.0000000e+00	0.0000000e+00	0.0000000e+00	0.0000000e+00	0.0000000e+00	0.0000000e+00	0.0000000e+00	0.0000000e+00	0.0000000e+00	0.0000000e+00	0.0000000e+00
13	0.0000000e+00	0.0000000e+00	0.0000000e+00	0.0000000e+00	0.0000000e+00	0.0000000e+00	0.0000000e+00	0.0000000e+00	0.0000000e+00	0.0000000e+00	0.0000000e+00	0.0000000e+00	0.0000000e+00	0.0000000e+00	0.0000000e+00	0.0000000e+00	0.0000000e+00	0.0000000e+00	0.0000000e+00	0.0000000e+00
14	0.0000000e+00	0.0000000e+00	0.0000000e+00	0.0000000e+00	0.0000000e+00	0.0000000e+00	0.0000000e+00	0.0000000e+00	0.0000000e+00	0.0000000e+00	0.0000000e+00	0.0000000e+00	0.0000000e+00	0.0000000e+00	0.0000000e+00	0.0000000e+00	0.0000000e+00	0.0000000e+00	0.0000000e+00	0.0000000e+00
15	0.0000000e+00	0.0000000e+00	0.0000000e+00	0.0000000e+00	0.0000000e+00	0.0000000e+00	0.0000000e+00	0.0000000e+00	0.0000000e+00	0.0000000e+00	0.0000000e+00	0.0000000e+00	0.0000000e+00	0.0000000e+00	0.0000000e+00	0.0000000e+00	0.0000000e+00	0.0000000e+00	0.0000000e+00	0.0000000e+00
16	0.0000000e+00	0.0000000e+00	0.0000000e+00	0.0000000e+00	0.0000000e+00	0.0000000e+00	0.0000000e+00	0.0000000e+00	0.0000000e+00	0.0000000e+00	0.0000000e+00	0.0000000e+00	0.0000000e+00	0.0000000e+00	0.0000000e+00	0.0000000e+00	0.0000000e+00	0.0000000e+00	0.0000000e+00	0.0000000e+00
17	0.0000000e+00	0.0000000e+00	0.0000000e+00	0.0000000e+00	0.0000000e+00	0.0000000e+00	0.0000000e+00	0.0000000e+00	0.0000000e+00	0.0000000e+00	0.0000000e+00	0.0000000e+00	0.0000000e+00	0.0000000e+00	0.0000000e+00	0.0000000e+00	0.0000000e+00	0.0000000e+00	0.0000000e+00	0.0000000e+00
18	0.0000000e+00	0.0000000e+00	0.0000000e+00	0.0000000e+00	0.0000000e+00	0.0000000e+00	0.0000000e+00	0.0000000e+00	0.0000000e+00	0.0000000e+00	0.0000000e+00	0.0000000e+00	0.0000000e+00	0.0000000e+00	0.0000000e+00	0.0000000e+00	0.0000000e+00	0.0000000e+00	0.0000000e+00	0.0000000e+00
19	0.0000000e+00	0.0000000e+00	0.0000000e+00	0.0000000e+00	0.0000000e+00	0.0000000e+00	0.0000000e+00	0.0000000e+00	0.0000000e+00	0.0000000e+00	0.0000000e+00	0.0000000e+00	0.0000000e+00	0.0000000e+00	0.0000000e+00	0.0000000e+00	0.0000000e+00	0.0000000e+00	0.0000000e+00	0.0000000e+00
20	0.0000000e+00	0.0000000e+00	0.0000000e+00	0.0000000e+00	0.0000000e+00	0.0000000e+00	0.0000000e+00	0.0000000e+00	0.0000000e+00	0.0000000e+00	0.0000000e+00	0.0000000e+00	0.0000000e+00	0.0000000e+00	0.0000000e+00	0.0000000e+00	0.0000000e+00	0.0000000e+00	0.0000000e+00	0.0000000e+00
21	0.0000000e+00	0.0000000e+00	0.0000000e+00	0.0000000e+00	0.0000000e+00	0.0000000e+00	0.0000000e+00	0.0000000e+00	0.0000000e+00	0.0000000e+00	0.0000000e+00	0.0000000e+00	0.0000000e+00	0.0000000e+00	0.0000000e+00	0.0000000e+00	0.0000000e+00	0.0000000e+00	0.0000000e+00	0.0000000e+00
22	0.0000000e+00	0.0000000e+00	0.0000000e+00	0.0000000e+00	0.0000000e+00	0.0000000e+00	0.0000000e+00	0.0000000e+00	0.0000000e+00	0.0000000e+00	0.0000000e+00	0.0000000e+00	0.0000000e+00	0.0000000e+00	0.0000000e+00	0.0000000e+00	0.0000000e+00	0.0000000e+00	0.0000000e+00	0.0000000e+00
23	0.0000000e+00	0.0000000e+00	0.0000000e+00	0.0000000e+00	0.0000000e+00	0.0000000e+00	0.0000000e+00	0.0000000e+00	0.0000000e+00	0.0000000e+00	0.0000000e+00	0.0000000e+00	0.0000000e+00	0.0000000e+00	0.0000000e+00	0.0000000e+00	0.0000000e+00	0.0000000e+00	0.0000000e+00	0.0000000e+00
24	0.0000000e+00	0.0000000e+00	0.0000000e+00	0.0000000e+00	0.0000000e+00	0.0000000e+00	0.0000000e+00	0.0000000e+00	0.0000000e+00	0.0000000e+00	0.0000000e+00	0.0000000e+00	0.0000000e+00	0.0000000e+00	0.0000000e+00	0.0000000e+00	0.0000000e+00	0.0000000e+00	0.0000000e+00	0.0000000e+00
25	0.0000000e+00	0.0000000e+00	0.0000000e+00	0.0000000e+00	0.0000000e+00	0.0000000e+00	0.0000000e+00	0.0000000e+00	0.0000000e+00	0.0000000e+00	0.0000000e+00	0.0000000e+00	0.0000000e+00	0.0000000e+00	0.0000000e+00	0.0000000e+00	0.0000000e+00	0.0000000e+00	0.0000000e+00	0.0000000e+00
26	0.0000000e+00	0.0000000e+00	0.0000000e+00	0.0000000e+00	0.0000000e+00	0.0000000e+00	0.0000000e+00	0.0000000e+00	0.0000000e+00	0.0000000e+00	0.0000000e+00	0.0000000e+00	0.0000000e+00	0.0000000e+00	0.0000000e+00	0.0000000e+00	0.0000000e+00	0.0000000e+00	0.0000000e+00	0.0000000e+00
27	0.0000000e+00	0.0000000e+00	0.0000000e+00	0.0000000e+00	0.0000000e+00	0.0000000e+00	0.0000000e+00	0.0000000e+00	0.0000000e+00	0.0000000e+00	0.0000000e+00	0.0000000e+00	0.0000000e+00	0.0000000e+00	0.0000000e+00	0.0000000e+00	0.0000000e+00	0.0000000e+00	0.0000000e+00	0.0000000e+00
28	0.0000000e+00	0.0000000e+00	0.0000000e+00	0.0000000e+00	0.0000000e+00	0.0000000e+00	0.0000000e+00	0.0000000e+00	0.0000000e+00	0.0000000e+00	0.0000000e+00	0.0000000e+00	0.0000000e+00	0.0000000e+00	0.0000000e+00	0.0000000e+00	0.0000000e+00	0.0000000e+00	0.0000000e+00	0.0000000e+00
29	0.0000000e+00	0.0000000e+00	0.0000000e+00	0.0000000e+00	0.0000000e+00	0.0000000e+00	0.0000000e+00	0.0000000e+00	0.0000000e+00	0.0000000e+00	0.0000000e+00	0.0000000e+00	0.0000000e+00	0.0000000e+00	0.0000000e+00	0.0000000e+00	0.0000000e+00	0.0000000e+00	0.0000000e+00	0.0000000e+00
30	0.0000000e+00	0.0000000e+00	0.0000000e+00	0.0000000e+00	0.0000000e+00	0.0000000e+00	0.0000000e+00	0.0000000e+00	0.0000000e+00	0.0000000e+00	0.0000000e+00	0.0000000e+00	0.0000000e+00	0.0000000e+00	0.0000000e+00	0.0000000e+00	0.0000000e+00	0.0000000e+00	0.0000000e+00	0.0000000e+00
31	0.0000000e+00	0.0000000e+00	0.0000000e+00	0.0000000e+00	0.0000000e+00	0.0000000e+00	0.0000000e+00	0.0000000e+00	0.0000000e+00	0.0000000e+00	0.0000000e+00	0.0000000e+00	0.0000000e+00	0.0000000e+00	0.0000000e+00	0.0000000e+00	0.0000000e+00	0.0000000e+00	0.0000000e+00	0.0000000e+00
32	0.0000000e+00	0.0000000e+00	0.0000000e+00	0.0000000e+00	0.0000000e+00	0.0000000e+00	0.0000000e+00	0.0000000e+00	0.0000000e+00	0.0000000e+00	0.0000000e+00	0.0000000e+00	0.0000000e+00	0.0000000e+00	0.0000000e+00	0.0000000e+00	0.0000000e+00	0.0000000e+00	0.0000000e+00	0.0000000e+00
33	0.0000000e+00	0.0000000e+00	0.0000000e+00	0.0000000e+00	0.0000000e+00	0.0000000e+00	0.0000000e+00	0.0000000e+00	0.0000000e+00	0.0000000e+00	0.0000000e+00	0.0000000e+00	0.0000000e+00	0.0000000e+00	0.0000000e+00	0.0000000e+00	0.0000000e+00	0.0000000e+00	0.0000000e+00	0.0000000e+00
34	0.0000000e+00	0.0000000e+00	0.0000000e+00	0.0000000e+00	0.0000000e+00	0.0000000e+00	0.0000000e+00	0.0000000e+00	0.0000000e+00	0.0000000e+00	0.0000000e+00	0.0000000e+00	0.0000000e+00	0.0000000e+00	0.0000000e+00	0.0000000e+00	0.0000000e+00	0.0000000e+00	0.0000000e+00	0.0000000e+00
35	0.0000000e+00	0.0000000e+00	0.0000000e+00	0.0000000e+00	0.0000000e+00	0.0000000e+00	0.0000000e+00	0.0000000e+00	0.0000000e+00	0.0000000e+00	0.0000000e+00	0.0000000e+00	0.0000000e+00	0.0000000e+00	0.0000000e+00	0.0000000e+00	0.0000000e+00	0.0000000e+00	0.0000000e+00	0.0000000e+00
36	7.1759924e-05	7.2180139e-05	7.2537800e-05	7.2837690e-05	1.7958814e-05	1.8063978e-05	1.8153487e-05	1.8228539e-05	4.4899517e-06	4.5162441e-06	4.5386226e-06	4.5573865e-06	1.1224889e-06	1.1290620e-06	1.1346566e-06	1.1393476e-06	2.8062206e-07	2.8226533e-07	2.8366399e-07	2.8483673e-07
37	2.2527424e-04	2.2662928e-04	2.2777594e-04	2.2875449e-04	5.6423802e-05	5.6763198e-05	5.7050402e-05	5.7295498e-05	1.4107338e-05	1.4192196e-05	1.4264004e-05	1.4325284e-05	3.5268400e-06	3.5480543e-06	3.5660064e-06	3.5813265e-06	8.8170906e-07	8.8701265e-07	8.9150066e-07	8.9533067e-07
38	4.7128625e-04	4.7420724e-04	4.7665675e-04	4.7877118e-04	1.1814932e-04	1.1888162e-04	1.1949572e-04	1.2002581e-04	2.9541658e-05	2.9724760e-05	2.9878306e-05	3.0010849e-05	7.3854313e-06	7.4312069e-06	7.4695936e-06	7.5027295e-06	1.8463549e-06	1.8577988e-06	1.8673955e-06	1.8756794e-06
39	8.2176598e-04	8.2702583e-04	8.3139552e-04	8.3517567e-04	2.0622224e-04	2.0754228e-04	2.0863890e-04	2.0958758e-04	5.1565880e-05	5.1895957e-05	5.2170168e-05	5.2407386e-05	1.2891510e-05	1.2974030e-05	1.3042583e-05	1.3101887e-05	3.2228707e-06	3.2435005e-06	3.2606387e-06	3.2754648e-06
40	1.2906146e-03	1.2991604e-03	1.3061946e-03	1.3122621e-03	3.2424771e-04	3.2639494e-04	3.2816232e-04	3.2968680e-04	8.1083027e-05	8.1619977e-05	8.2061938e-05	8.2443160e-05	2.0270839e-05	2.0405077e-05	2.0515568e-05	2.0610874e-05	5.0676957e-06	5.1012550e-06	5.1288777e-06	5.1527040e-06
41	1.8926762e-03	1.9056630e-03	1.9162489e-03	1.9253392e-03	4.7610913e-04	4.7937654e-04	4.8203976e-04	4.8432672e-04	1.1906626e-04	1.1988339e-04	1.2054941e-04	1.2112134e-04	2.9766717e-05	2.9971000e-05	3.0137508e-05	3.0280491e-05	7.4416531e-06	7.4927237e-06	7.5343504e-06	7.5700961e-06
42	2.6451926e-03	2.6640397e-03	2.6792437e-03	2.6922318e-03	6.6634943e-04	6.7109835e-04	6.7492906e-04	6.7820139e-04	1.6665444e-04	1.6784217e-04	1.6880024e-04	1.6961866e-04	4.1663873e-05	4.1960806e-05	4.2200325e-05	4.2404931e-05	1.0415923e-05	1.0490156e-05	1.0550036e-05	1.0601187e-05
43	3.5679296e-03	3.5943872e-03	3.6155132e-03	3.6334283e-03	9.0022205e-04	9.0689991e-04	9.1223156e-04	9.1675268e-04	2.2516516e-04	2.2683547e-04	2.2816905e-04	2.2929989e-04	5.6291719e-05	5.6709299e-05	5.7042697e-05	5.7325410e-05	1.4072856e-05	1.4177250e-05	1.4260600e-05	1.4331277e-05
44	4.6819638e-03	4.7181893e-03	4.7468147e-03	4.7708868e-03	1.1834008e-03	1.1925615e-03	1.1997995e-03	1.2058857e-03	2.9602237e-04	2.9831396e-04	3.0012454e-04	3.0164699e-04	7.4006266e-05	7.4579168e-05	7.5031817e-05	7.5412434e-05	1.8501451e-05	1.8644675e-05	1.8757837e-05	1.8852991e-05
45	6.0115399e-03	6.0602373e-03	6.0982685e-03	6.1299677e-03	1.5224833e-03	1.5348248e-03	1.5444615e-03	1.5524928e-03	3.8088287e-04	3.8397048e-04	3.8638139e-04	3.8839064e-04	9.5221743e-05	9.5993653e-05	9.6596387e-05	9.7098706e-05	2.3805260e-05	2.3998236e-05	2.4148918e-05	2.4274497e-05
46	7.5831597e-03	7.6477411e-03	7.6974823e-03	7.7385463e-03	1.9247905e-03	1.9411980e-03	1.9538323e-03	1.9642608e-03	4.8158651e-04	4.8569190e-04	4.8885315e-04	4.9146246e-04	1.2039815e-04	1.2142451e-04	1.2221483e-04	1.2286717e-04	3.0099276e-05	3.0355864e-05	3.0553442e-05	3.0716525e-05
47	9.4269184e-03	9.5116768e-03	9.5759336e-03	9.6284363e-03	2.3987585e-03	2.4203528e-03	2.4367186e-03	2.4500876e-03	6.0025505e-04	6.0565908e-04	6.0975458e-04	6.1310012e-04	1.5006597e-04	1.5141700e-04	1.5244089e-04	1.5327729e-04	3.7516113e-05	3.7853867e-05	3.8109837e-05	3.8318934e-05
48	1.1576385e-02	1.1686716e-02	1.1768912e-02	1.1835374e-02	2.9539669e-03	2.9821667e-03	3.0031662e-03	3.0201408e-03	7.3930013e-04	7.4635841e-04	7.5161437e-04	7.5586289e-04	1.8482819e-04	1.8659280e-04	1.8790681e-04	1.8896896e-04	4.6206505e-05	4.6647650e-05	4.6976150e-05	4.7241684e-05
49	1.4068461e-02	1.4211181e-02	1.4315511e-02	1.4398967e-02	3.6011730e-03	3.6377843e-03	3.6645322e-03	3.6859204e-03	9.0143292e-04	9.1059841e-04	9.1729442e-04	9.2264858e-04	2.2536269e-04	2.2765411e-04	2.2932815e-04	2.3066672e-04	5.6339906e-05	5.6912753e-05	5.7331256e-05	5.7665893e-05
50	1.6945876e-02	1.7129552e-02	1.7261258e-02	1.7365360e-02	4.3530814e-03	4.4003953e-03	4.4342968e-03	4.4610799e-03	1.0898588e-03	1.1017063e-03	1.1101950e-03	1.1169011e-03	2.7247093e-04	2.7543288e-04	2.7755510e-04	2.7923167e-04	6.8116663e-05	6.8857138e-05	6.9387684e-05	6.9806819e-05
51	2.0252331e-02	2.0487644e-02	2.0653289e-02	2.0782412e-02	5.2231433e-03	5.2840448e-03	5.3268771e-03	5.3602442e-03	1.3079777e-03	1.3232315e-03	1.3339591e-03	1.3423158e-03	3.2700301e-04	3.3081658e-04	3.3349855e-04	3.3558777e-04	8.1749278e-05	8.2702650e-05	8.3373129e-05	8.3895427e-05
52	2.4036309e-02	2.4336615e-02	2.4544382e-02	2.4703806e-02	6.2267261e-03	6.3048650e-03	6.3588686e-03	6.4002724e-03	1.5596799e-03	1.5792569e-03	1.5927863e-03	1.6031586e-03	3.8993171e-04	3.9482613e-04	3.9820859e-04	4.0080175e-04	9.7480909e-05	9.8704487e-05	9.9550081e-05	1.0019836e-04
53	2.8351474e-02	2.8733287e-02	2.8993362e-02	2.9189480e-02	7.3814167e-03	7.4813661e-03	7.5493668e-03	7.6005896e-03	1.8494254e-03	1.8744753e-03	1.8915170e-03	1.9043532e-03	4.6237231e-04	4.6863503e-04	4.7289561e-04	4.7610477e-04	1.1559034e-04	1.1715597e-04	1.1822109e-04	1.1902336e-04
54	3.3255201e-02	3.3738731e-02	3.4063860e-02	3.4304437e-02	8.7068382e-03	8.8342804e-03	8.9198645e-03	8.9831039e-03	2.1822022e-03	2.2141548e-03	2.2356112e-03	2.2514644e-03	5.4557207e-04	5.5356058e-04	5.5892491e-04	5.6288838e-04	1.3638932e-04	1.3838638e-04	1.3972743e-04	1.4071826e-04
55	3.8810523e-02	3.9420370e-02	3.9826370e-02	4.0121001e-02	1.0225501e-02	1.0387474e-02	1.0495166e-02	1.0573182e-02	2.5637451e-03	2.6043732e-03	2.6313838e-03	2.6509495e-03	6.4096516e-04	6.5112271e-04	6.5787572e-04	6.6276739e-04	1.6023632e-04	1.6277562e-04	1.6446381e-04	1.6568669e-04
56	4.5081349e-02	4.5847107e-02	4.6353473e-02	4.6714072e-02	1.1961728e-02	1.2166869e-02	1.2302350e-02	1.2398631e-02	3.0002716e-03	3.0517531e-03	3.0857504e-03	3.1099083e-03	7.5010651e-04	7.6297764e-04	7.7147747e-04	7.7751728e-04	1.8751999e-04	1.9073764e-04	1.9286252e-04	1.9437241e-04
57	5.2136608e-02	5.3093575e-02	5.3724405e-02	5.4165668e-02	1.3943298e-02	1.4202143e-02	1.4372581e-02	1.4491518e-02	3.4989041e-03	3.5638993e-03	3.6066932e-03	3.6365520e-03	8.7477736e-04	8.9102727e-04	9.0172648e-04	9.0919166e-04	2.1868552e-04	2.2274780e-04	2.2542248e-04	2.2728869e-04
58	6.0047966e-02	6.1238262e-02	6.2022934e-02	6.2562926e-02	1.6201274e-02	1.6526713e-02	1.6741059e-02	1.6888174e-02	4.0676377e-03	4.1494066e-03	4.2032598e-03	4.2402161e-03	1.0169774e-03	1.0374213e-03	1.0508856e-03	1.0601254e-03	2.5423267e-04	2.5934335e-04	2.6270926e-04	2.6501908e-04
59	6.8889583e-02	7.0363003e-02	7.1336946e-02	7.1997990e-02	1.8770540e-02	1.9178252e-02	1.9447598e-02	1.9629889e-02	4.7154900e-03	4.8180042e-03	4.8857260e-03	4.9315521e-03	1.1789623e-03	1.2045932e-03	1.2215252e-03	1.2329827e-03	2.9472514e-04	3.0113246e-04	3.0536519e-04	3.0822940e-04
60	7.8734330e-02	8.0548690e-02	8.1754235e-02	8.2563557e-02	2.1689224e-02	2.2198014e-02	2.2536024e-02	2.2762275e-02	5.4523702e-03	5.5804038e-03	5.6654610e-03	5.7223857e-03	1.3632108e-03	1.3952225e-03	1.4164890e-03	1.4307216e-03	3.4078238e-04	3.4878473e-04	3.5410098e-04	3.5765888e-04
61	8.9659732e-02	9.1882054e-02	9.3369380e-02	9.4360093e-02	2.5001642e-02	2.5634120e-02	2.6057561e-02	2.6338808e-02	6.2898519e-03	6.4491575e-03	6.5558146e-03	6.6266438e-03	1.5726183e-03	1.6124494e-03	1.6391168e-03	1.6568261e-03	3.9312788e-04	4.0308485e-04	4.0975116e-04	4.1417814e-04
62	1.0173568e-01	1.0444300e-01	1.0627074e-01	1.0748305e-01	2.8754943e-02	2.9538161e-02	3.0067408e-02	3.0417527e-02	7.2403450e-03	7.4378243e-03	7.5712758e-03	7.6595465e-03	1.8102897e-03	1.8596662e-03	1.8930335e-03	1.9151041e-03	4.5253746e-04	4.6488043e-04	4.7322150e-04	4.7873865e-04
63	1.1502758e-01	1.1830831e-01	1.2054499e-01	1.2202692e-01	3.3001202e-02	3.3967605e-02	3.4627490e-02	3.5063742e-02	8.3176641e-03	8.5616194e-03	8.7282150e-03	8.8383385e-03	2.0796820e-03	2.1406801e-03	2.1823354e-03	2.2098705e-03	5.1987478e-04	5.3512271e-04	5.4553544e-04	5.5241849e-04
64	1.2959662e-01	1.3355170e-01	1.3627649e-01	1.3808473e-01	3.7798740e-02	3.8987202e-02	3.9807823e-02	4.0351529e-02	9.5374112e-03	9.8378236e-03	1.0045285e-02	1.0182729e-02	2.3846997e-03	2.4598158e-03	2.5116904e-03	2.5460572e-03	5.9611530e-04	6.1489209e-04	6.2785917e-04	6.3644983e-04
65	1.4549160e-01	1.5023626e-01	1.5353888e-01	1.5573963e-01	4.3209989e-02	4.4667257e-02	4.5684587e-02	4.6361919e-02	1.0916480e-02	1.1285398e-02	1.1542992e-02	1.1714490e-02	2.7295715e-03	2.8218193e-03	2.8862307e-03	2.9291137e-03	6.8231527e-04	7.0537409e-04	7.2147471e-04	7.3219400e-04
66	1.6274863e-01	1.6841363e-01	1.7239499e-01	1.7506456e-01	4.9302370e-02	5.1084550e-02	5.2341507e-02	5.3184349e-02	1.2473347e-02	1.2925295e-02	1.3244123e-02	1.3457916e-02	3.1189232e-03	3.2319354e-03	3.3116608e-03	3.3651213e-03	7.7963000e-04	8.0787870e-04	8.2780691e-04	8.4116993e-04
67	1.8139066e-01	1.8812461e-01	1.9289760e-01	1.9612283e-01	5.6149424e-02	5.8324222e-02	5.9871937e-02	6.0918866e-02	1.4228449e-02	1.4781036e-02	1.5174395e-02	1.5440501e-02	3.5578723e-03	3.6960544e-03	3.7944197e-03	3.8609637e-03	8.8933744e-04	9.2387688e-04	9.4846379e-04	9.6509682e-04
68	2.0142103e-01	2.0939166e-01	2.1508212e-01	2.1896164e-01	6.3828556e-02	6.6477464e-02	6.8376913e-02	6.9674680e-02	1.6203695e-02	1.6878233e-02	1.7362066e-02	1.7692693e-02	4.0519067e-03	4.2205905e-03	4.3415844e-03	4.4242661e-03	1.0128077e-03	1.0549702e-03	1.0852125e-03	1.1058787e-03
69	2.2282074e-01	2.3221791e-01	2.3896491e-01	2.4360919e-01	7.2419877e-02	7.5641497e-02	7.7965112e-02	7.9569910e-02	1.8422271e-02	1.9244704e-02	1.9838071e-02	2.0247985e-02	4.6068365e-03	4.8125129e-03	4.9609045e-03	5.0634178e-03	1.1514910e-03	1.2028984e-03	1.2399878e-03	1.2656101e-03
70	2.4555378e-01	2.5659258e-01	2.6455041e-01	2.7008075e-01	8.2009792e-02	8.5923935e-02	8.8758334e-02	9.0736919e-02	2.0909744e-02	2.1911806e-02	2.2637662e-02	2.3144530e-02	5.2290695e-03	5.4796796e-03	5.6612131e-03	5.7879792e-03	1.3069866e-03	1.3696229e-03	1.4149943e-03	1.4466774e-03
71	2.6955334e-01	2.8247668e-01	2.9181493e-01	2.9836335e-01	9.2681306e-02	9.7433420e-02	1.0088163e-01	1.0331291e-01	2.3691624e-02	2.4912131e-02	2.5797997e-02	2.6422874e-02	5.9250041e-03	6.2302619e-03	6.4518245e-03	6.6081126e-03	1.4808904e-03	1.5571823e-03	1.6125564e-03	1.6516166e-03
72	2.9473111e-01	3.0981314e-01	3.2071888e-01	3.2842814e-01	1.0451916e-01	1.1028622e-01	1.1447143e-01	1.1744850e-01	2.6794931e-02	2.8281508e-02	2.9360578e-02	3.0128535e-02	6.7014207e-03	7.0732465e-03	7.3431468e-03	7.5352320e-03	1.6748931e-03	1.7678184e-03	1.8352706e-03	1.8832754e-03
73	3.2097427e-01	3.3852253e-01	3.5120080e-01	3.6022506e-01	1.1760506e-01	1.2460189e-01	1.2967094e-01	1.3330372e-01	3.0247111e-02	3.2058112e-02	3.3370350e-02	3.4311290e-02	7.5652112e-03	8.0182130e-03	8.3464556e-03	8.5818240e-03	1.8907126e-03	2.0039198e-03	2.0859489e-03	2.1447681e-03
74	3.4814672e-01	3.6850105e-01	3.8317773e-01	3.9368208e-01	1.3201358e-01	1.4049836e-01	1.4662710e-01	1.5104472e-01	3.4075104e-02	3.6281416e-02	3.7875186e-02	3.9024637e-02	8.5231479e-03	9.0750744e-03	9.4737692e-03	9.7613164e-03	2.1300354e-03	2.2679571e-03	2.3675874e-03	2.4394425e-03
75	3.7609739e-01	3.9962798e-01	4.1655245e-01	4.2871470e-01	1.4781522e-01	1.5809566e-01	1.6549517e-01	1.7085006e-01	3.8306418e-02	4.0993568e-02	4.2927620e-02	4.4328052e-02	9.5821529e-03	1.0254423e-02	1.0738283e-02	1.1088645e-02	2.3945844e-03	2.5625689e-03	2.6834742e-03	2.7710211e-03
76	4.0465455e-01	4.3175859e-01	4.5120609e-01	4.6521645e-01	1.6506326e-01	1.7750201e-01	1.8642538e-01	1.9289650e-01	4.2965647e-02	4.6235822e-02	4.8581517e-02	5.0283477e-02	1.0748428e-02	1.1566637e-02	1.2153538e-02	1.2579377e-02	2.6859007e-03	2.8903386e-03	3.0369818e-03	3.1433816e-03
77	4.3363265e-01	4.6473467e-01	4.8700946e-01	5.0307282e-01	1.8379837e-01	1.9882191e-01	2.0957320e-01	2.1737164e-01	4.8076035e-02	5.2051266e-02	5.4895564e-02	5.6959578e-02	1.2027846e-02	1.3022570e-02	1.3734299e-02	1.4250781e-02	3.0054421e-03	3.2539656e-03	3.4317853e-03	3.5608235e-03
78	4.6282626e-01	4.9837835e-01	5.2381486e-01	5.4215059e-01	2.0402963e-01	2.2213710e-01	2.3507947e-01	2.4445267e-01	5.3654082e-02	5.8479595e-02	6.1928004e-02	6.4426201e-02	1.3424602e-02	1.4632239e-02	1.5495239e-02	1.6120441e-02	3.3542452e-03	3.6559380e-03	3.8715337e-03	4.0277220e-03
79	4.9202666e-01	5.3251002e-01	5.6147125e-01	5.8231722e-01	2.2574964e-01	2.4752511e-01	2.6308926e-01	2.7432964e-01	5.9714105e-02	6.5563013e-02	6.9742916e-02	7.2762069e-02	1.4942359e-02	1.6406310e-02	1.7452515e-02	1.8208193e-02	3.7332113e-03	4.0989027e-03	4.3602425e-03	4.5490090e-03
80	5.2101675e-01	5.6694079e-01	5.9981466e-01	6.2342955e-01	2.4891251e-01	2.7503504e-01	2.9372536e-01	3.0717809e-01	6.6261560e-02	7.3339252e-02	7.8402833e-02	8.2047350e-02	1.6582572e-02	1.8354348e-02	1.9621924e-02	2.0534263e-02	4.1426886e-03	4.5852279e-03	4.9018329e-03	5.1297096e-03
81	5.4957533e-01	6.0147619e-01	6.3867159e-01	6.6533768e-01	2.7342825e-01	3.0468151e-01	3.2708159e-01	3.4315358e-01	7.3290897e-02	8.1839710e-02	8.7966980e-02	9.2362513e-02	1.8343950e-02	2.0484352e-02	2.2018462e-02	2.3118987e-02	4.5823375e-03	5.1168879e-03	5.5000212e-03	5.7748701e-03
82	5.7748173e-01	6.3592006e-01	6.7786753e-01	7.0789419e-01	2.9917223e-01	3.3645638e-01	3.6324029e-01	3.8241245e-01	8.0788399e-02	9.1093608e-02	9.8497595e-02	1.0379600e-01	2.0223168e-02	2.2803804e-02	2.4657918e-02	2.5984743e-02	5.0513090e-03	5.6957227e-03	6.1587151e-03	6.4900389e-03
83	6.0451269e-01	6.7006588e-01	7.1721831e-01	7.5094302e-01	3.2595569e-01	3.7028955e-01	4.0223078e-01	4.2506712e-01	8.8721579e-02	1.0111489e-01	1.1004646e-01	1.1643018e-01	2.2212206e-02	2.5316379e-02	2.7553495e-02	2.9152436e-02	5.5475806e-03	6.3226186e-03	6.8811711e-03	7.2803887e-03
84	6.3046093e-01	7.0371157e-01	7.5654598e-01	7.9433199e-01	3.5355642e-01	4.0607794e-01	4.4406298e-01	4.7121927e-01	9.7048110e-02	1.1191146e-01	1.2266631e-01	1.3035327e-01	2.4300584e-02	2.8024267e-02	3.0718681e-02	3.2644487e-02	6.0685146e-03	6.9980859e-03	7.6707088e-03	8.1514608e-03
85	6.5513514e-01	7.3665563e-01	7.9567276e-01	8.3790507e-01	3.8170028e-01	4.4365454e-01	4.8869172e-01	5.2091954e-01	1.0570775e-01	1.2347347e-01	1.3639821e-01	1.4564564e-01	2.6473327e-02	3.0925231e-02	3.4164079e-02	3.6481413e-02	6.6103523e-03	7.7215269e-03	8.5299206e-03	9.1083118e-03
86	6.7836472e-01	7.6870313e-01	8.3442725e-01	8.8150903e-01	4.1007911e-01	4.8280593e-01	5.3603683e-01	5.7418909e-01	1.1462699e-01	1.3577845e-01	1.5127840e-01	1.6238784e-01	2.8712134e-02	3.4013885e-02	3.7899136e-02	4.0683849e-02	7.1685059e-03	8.4915546e-03	9.4611019e-03	1.0156015e-02
87	6.9999809e-01	7.9965751e-01	8.7263314e-01	9.2498601e-01	4.3833929e-01	5.2324236e-01	5.8594607e-01	6.3098408e-01	1.2371250e-01	1.4877857e-01	1.6732400e-01	1.8064716e-01	3.0993708e-02	3.7278505e-02	4.1928539e-02	4.5269171e-02	7.7371447e-03	9.3051987e-03	1.0465354e-02	1.1298819e-02
88	7.1990627e-01	8.2932799e-01	9.1011323e-01	9.6817933e-01	4.6609755e-01	5.6461235e-01	6.3820512e-01	6.9120916e-01	1.3285444e-01	1.6240341e-01	1.8453504e-01	2.0048175e-01	3.3290582e-02	4.0701688e-02	4.6252744e-02	5.0252530e-02	8.3094024e-03	1.0158072e-02	1.1542714e-02	1.2540405e-02
89	7.3798744e-01	8.5753986e-01	9.4669406e-01	1.0000000e+00	4.9295624e-01	6.0651969e-01	6.9254411e-01	7.5472473e-01	1.4192948e-01	1.7656310e-01	2.0289516e-01	2.2194246e-01	3.5571872e-02	4.4261162e-02	5.0868124e-02	5.5647339e-02	8.8775677e-03	1.1044575e-02	1.2692194e-02	1.3884005e-02
90	7.5417146e-01	8.8413698e-01	9.8220551e-01	1.0000000e+00	5.1851071e-01	6.4851639e-01	7.4861650e-01	8.2132043e-01	1.5079995e-01	1.9114101e-01	2.2235902e-01	2.4505918e-01	3.7803034e-02	4.7927895e-02	5.5763806e-02	6.1461811e-02	9.4330260e-03	1.1957426e-02	1.3910997e-02	1.5331545e-02
91	7.6842708e-01	9.0898380e-01	1.0000000e+00	1.0000000e+00	5.4238701e-01	6.9013157e-01	8.0602873e-01	8.9074805e-01	1.5932687e-01	2.0600299e-01	2.4286258e-01	2.6985378e-01	3.9949132e-02	5.1668435e-02	6.0924248e-02	6.7702245e-02	9.9670757e-03	1.2888247e-02	1.5195157e-02	1.6884457e-02
92	7.8076541e-01	9.3196337e-01	1.0000000e+00	1.0000000e+00	5.6425456e-01	7.3085886e-01	8.6430390e-01	9.6267502e-01	1.6737220e-01	2.2098705e-01	2.6430272e-01	2.9631657e-01	4.1975398e-02	5.5442261e-02	6.6324075e-02	7.4367059e-02	1.0471070e-02	1.3826912e-02	1.6538258e-02	1.8542200e-02
93	7.9124265e-01	9.5298046e-01	1.0000000e+00	1.0000000e+00	5.8386231e-01	7.7019155e-01	9.2292403e-01	1.0000000e+00	1.7481472e-01	2.3591657e-01	2.8655318e-01	3.2442361e-01	4.3851218e-02	5.9205114e-02	7.1932105e-02	8.1451187e-02	1.0937407e-02	1.4762375e-02	1.7932440e-02	2.0303346e-02
94	7.9995671e-01	9.7196346e-01	1.0000000e+00	1.0000000e+00	6.0104074e-01	8.0761362e-01	9.8131331e-01	1.0000000e+00	1.8155019e-01	2.5058933e-01	3.0944693e-01	3.5410872e-01	4.5550172e-02	6.2906171e-02	7.7706827e-02	8.8938960e-02	1.1359545e-02	1.5681974e-02	1.9367282e-02	2.2163829e-02
95	8.0704456e-01	9.8887120e-01	1.0000000e+00	1.0000000e+00	6.1572263e-01	8.4263658e-01	1.0000000e+00	1.0000000e+00	1.8750349e-01	2.6479065e-01	3.3278566e-01	3.8526969e-01	4.7053103e-02	6.6491342e-02	8.3598765e-02	9.6805649e-02	1.1732760e-02	1.6572261e-02	2.0830395e-02	2.4117322e-02
96	8.1267299e-01	1.0000000e+00	1.0000000e+00	1.0000000e+00	6.2794509e-01	8.7483584e-01	1.0000000e+00	1.0000000e+00	1.9263500e-01	2.7830927e-01	3.5634792e-01	4.1777615e-01	4.8349745e-02	6.9907258e-02	8.9552531e-02	1.0501945e-01	1.2054547e-02	1.7419987e-02	2.2307938e-02	2.6155737e-02
97	8.1703446e-01	1.0000000e+00	1.0000000e+00	1.0000000e+00	6.3784901e-01	9.0386335e-01	1.0000000e+00	1.0000000e+00	1.9694424e-01	2.9093928e-01	3.7987073e-01	4.5143406e-01	4.9439664e-02	7.3101717e-02	9.5502064e-02	1.1353242e-01	1.2324852e-02	1.8212226e-02	2.3783448e-02	2.8266990e-02
98	8.2056181e-01	1.0000000e+00	1.0000000e+00	1.0000000e+00	6.4566308e-01	9.2949186e-01	1.0000000e+00	1.0000000e+00	2.0047159e-01	3.0250822e-01	4.0307777e-01	4.8602106e-01	5.0332743e-02	7.6030825e-02	1.0137779e-01	1.2228940e-01	1.2546181e-02	1.8938141e-02	2.5239617e-02	3.0437214e-02
99	8.2337586e-01	1.0000000e+00	1.0000000e+00	1.0000000e+00	6.5166657e-01	9.5161274e-01	1.0000000e+00	1.0000000e+00	2.0328564e-01	3.1287711e-01	4.2566570e-01	5.2126477e-01	5.1046008e-02	7.8658976e-02	1.0710304e-01	1.3122246e-01	1.2722815e-02	1.9588977e-02	2.6657419e-02	3.2649397e-02
100	8.2556664e-01	1.0000000e+00	1.0000000e+00	1.0000000e+00	6.5616379e-01	9.7025151e-01	1.0000000e+00	1.0000000e+00	2.0547642e-01	3.2195680e-01	4.4732486e-01	5.5685985e-01	5.1601942e-02	8.0963047e-02	1.1259929e-01	1.4025510e-01	1.2860375e-02	2.0159098e-02	2.8017416e-02	3.4884442e-02
101	8.2723209e-01	1.0000000e+00	1.0000000e+00	1.0000000e+00	6.5945118e-01	9.8555552e-01	1.0000000e+00	1.0000000e+00	2.0714187e-01	3.2971008e-01	4.6775036e-01	5.9246045e-01	5.2025091e-02	8.2932963e-02	1.1778890e-01	1.4930032e-01	1.2964990e-02	2.0646119e-02	2.9300440e-02	3.7120688e-02
102	8.2846735e-01	1.0000000e+00	1.0000000e+00	1.0000000e+00	6.6179390e-01	9.9779763e-01	1.0000000e+00	1.0000000e+00	2.0837713e-01	3.3616504e-01	4.8666928e-01	6.2769606e-01	5.2339352e-02	8.4575160e-02	1.2260204e-01	1.5826457e-01	1.3042614e-02	2.1051750e-02	3.0489311e-02	3.9334904e-02
103	8.2935859e-01	1.0000000e+00	1.0000000e+00	1.0000000e+00	6.6341708e-01	1.0000000e+00	1.0000000e+00	1.0000000e+00	2.0926837e-01	3.4140284e-01	5.0384817e-01	6.6215652e-01	5.2566407e-02	8.5909555e-02	1.2697857e-01	1.6704379e-01	1.3098644e-02	2.1381037e-02	3.1569300e-02	4.1501338e-02
104	8.2998282e-01	1.0000000e+00	1.0000000e+00	1.0000000e+00	6.6450830e-01	1.0000000e+00	1.0000000e+00	1.0000000e+00	2.0989260e-01	3.4554590e-01	5.1911399e-01	6.9541209e-01	5.2725669e-02	8.6966595e-02	1.3087342e-01	1.7552846e-01	1.3137905e-02	2.1641617e-02	3.2529453e-02	4.3592967e-02
105	8.3040637e-01	1.0000000e+00	1.0000000e+00	1.0000000e+00	6.6521868e-01	1.0000000e+00	1.0000000e+00	1.0000000e+00	2.1031615e-01	3.4874446e-01	5.3237044e-01	7.2703473e-01	5.2833898e-02	8.7783921e-02	1.3426083e-01	1.8360898e-01	1.3164557e-02	2.1842888e-02	3.3363622e-02	4.5582838e-02
106	8.3068391e-01	1.0000000e+00	1.0000000e+00	1.0000000e+00	6.6566510e-01	1.0000000e+00	1.0000000e+00	1.0000000e+00	2.1059369e-01	3.5115683e-01	5.4360092e-01	7.5662067e-01	5.2904934e-02	8.8401358e-02	1.3713523e-01	1.9118138e-01	1.3182031e-02	2.1994764e-02	3.4070660e-02	4.7445482e-02
107	8.3085857e-01	1.0000000e+00	1.0000000e+00	1.0000000e+00	6.6593445e-01	1.0000000e+00	1.0000000e+00	1.0000000e+00	2.1076835e-01	3.5293200e-01	5.5287721e-01	7.8380867e-01	5.2949714e-02	8.8856484e-02	1.3951353e-01	1.9815198e-01	1.3193033e-02	2.2106582e-02	3.4654976e-02	4.9158060e-02
108	8.3096453e-01	1.0000000e+00	1.0000000e+00	1.0000000e+00	6.6609103e-01	1.0000000e+00	1.0000000e+00	1.0000000e+00	2.1087431e-01	3.5420357e-01	5.6035018e-01	8.0831843e-01	5.2976931e-02	8.9183087e-02	1.4143296e-01	2.0444731e-01	1.3199711e-02	2.2186723e-02	3.5125962e-02	5.0702794e-02
109	8.3102536e-01	1.0000000e+00	1.0000000e+00	1.0000000e+00	6.6617717e-01	1.0000000e+00	1.0000000e+00	1.0000000e+00	2.1093514e-01	3.5508786e-01	5.6621932e-01	8.2994431e-01	5.2992584e-02	8.9410648e-02	1.4294331e-01	2.1001245e-01	1.3203547e-02	2.2242488e-02	3.5496081e-02	5.2066563e-02
110	8.3105865e-01	1.0000000e+00	1.0000000e+00	1.0000000e+00	6.6622233e-01	1.0000000e+00	1.0000000e+00	1.0000000e+00	2.1096843e-01	3.5568383e-01	5.7071999e-01	8.4859735e-01	5.3001168e-02	8.9564320e-02	1.4410382e-01	2.1482216e-01	1.3205648e-02	2.2280094e-02	3.5780075e-02	5.3243577e-02
111	8.3107597e-01	1.0000000e+00	1.0000000e+00	1.0000000e+00	6.6624483e-01	1.0000000e+00	1.0000000e+00	1.0000000e+00	2.1098575e-01	3.5607174e-01	5.7409165e-01	8.6429366e-01	5.3005643e-02	8.9664551e-02	1.4497502e-01	2.1887793e-01	1.3206741e-02	2.2304587e-02	3.5992964e-02	5.4234653e-02
112	8.3108427e-01	1.0000000e+00	1.0000000e+00	1.0000000e+00	6.6625516e-01	1.0000000e+00	1.0000000e+00	1.0000000e+00	2.1099405e-01	3.5631434e-01	5.7655738e-01	8.7717858e-01	5.3007793e-02	8.9727376e-02	1.4561354e-01	2.2221458e-01	1.3207266e-02	2.2319915e-02	3.6148756e-02	5.5048761e-02
113	8.3108820e-01	1.0000000e+00	1.0000000e+00	1.0000000e+00	6.6625984e-01	1.0000000e+00	1.0000000e+00	1.0000000e+00	2.1099798e-01	3.5646059e-01	5.7831232e-01	8.8749229e-01	5.3008812e-02	8.9765335e-02	1.4606904e-01	2.2489154e-01	1.3207514e-02	2.2329162e-02	3.6259716e-02	5.5700868e-02
114	8.3108924e-01	1.0000000e+00	1.0000000e+00	1.0000000e+00	6.6626103e-01	1.0000000e+00	1.0000000e+00	1.0000000e+00	2.1099902e-01	3.5654406e-01	5.7952580e-01	8.9554629e-01	5.3009083e-02	8.9787052e-02	1.4638476e-01	2.2698703e-01	1.3207580e-02	2.2334444e-02	3.6336497e-02	5.6210475e-02
115	8.3108924e-01	1.0000000e+00	1.0000000e+00	1.0000000e+00	6.6626103e-01	1.0000000e+00	1.0000000e+00	1.0000000e+00	2.1099902e-01	3.5658947e-01	5.8033876e-01	9.0168558e-01	5.3009083e-02	8.9798897e-02	1.4659681e-01	2.2858836e-01	1.3207580e-02	2.2337319e-02	3.6387975e-02	5.6599226e-02
116	8.3108924e-01	1.0000000e+00	1.0000000e+00	1.0000000e+00	6.6626103e-01	1.0000000e+00	1.0000000e+00	1.0000000e+00	2.1099902e-01	3.5661296e-01	5.8086490e-01	9.0625883e-01	5.3009083e-02	8.9805040e-02	1.4673441e-01	2.2978435e-01	1.3207580e-02	2.2338808e-02	3.6421318e-02	5.6889043e-02
117	8.3108924e-01	1.0000000e+00	1.0000000e+00	1.0000000e+00	6.6626103e-01	1.0000000e+00	1.0000000e+00	1.0000000e+00	2.1099902e-01	3.5662416e-01	5.8119218e-01	9.0958507e-01	5.3009083e-02	8.9807977e-02	1.4682023e-01	2.3065661e-01	1.3207580e-02	2.2339518e-02	3.6442076e-02	5.7100009e-02
118	8.3108924e-01	1.0000000e+00	1.0000000e+00	1.0000000e+00	6.6626103e-01	1.0000000e+00	1.0000000e+00	1.0000000e+00	2.1099902e-01	3.5662943e-01	5.8138843e-01	9.1194008e-01	5.3009083e-02	8.9809362e-02	1.4687184e-01	2.3127596e-01	1.3207580e-02	2.2339853e-02	3.6454534e-02	5.7249505e-02
119	8.3108924e-01	1.0000000e+00	1.0000000e+00	1.0000000e+00	6.6626103e-01	1.0000000e+00	1.0000000e+00	1.0000000e+00	2.1099902e-01	3.5663082e-01	5.8149990e-01	9.1356059e-01	5.3009083e-02	8.9809730e-02	1.4690125e-01	2.3170342e-01	1.3207580e-02	2.2339941e-02	3.6461616e-02	5.7352468e-02
120	8.3108924e-01	1.0000000e+00	1.0000000e+00	1.0000000e+00	6.6626103e-01	1.0000000e+00	1.0000000e+00	1.0000000e+00	2.1099902e-01	3.5663082e-01	5.8156027e-01	9.1464144e-01	5.3009083e-02	8.9809730e-02	1.4691722e-01	2.3198942e-01	1.3207580e-02	2.2339941e-02	3.6465456e-02	5.7421207e-02
