# Supplementary material for: Quantifying the Potential for Future Gene Therapy to Lower Lifetime Risk of Polygenic Late-Onset Diseases
Source: MDPI journal article supplement (doi:10.3390/ijms20133352), 2019-07-08
Supplement: s2 [file s2 › SuppFiles/Results/LODsCommonLow/ColorectalCancer/-1.000/FrailtyAnalysis.csv]

Age	Heritability	MeanOR	CaseOR	nControls	nCases	nCumIncidence	nIncidence	nLifeIncidence0	nAbsIncidence0	nLifeIncidence5	nAbsIncidence5	nLifeIncidence10	nAbsIncidence10	nLifeIncidence15	nAbsIncidence15	nIncActDivExp
24	0.18304	0.55454	0.839498	999999572	428	4.28e-07	4.28e-07	4.22626e-07	4.22626e-07	4.2409e-07	4.2409e-07	4.24728e-07	4.24728e-07	4.24938e-07	4.24938e-07	0.246061
25	0.18304	0.554539	0.830633	999998700	872	1.3e-06	8.72e-07	1.28291e-06	8.60285e-07	1.28767e-06	8.63581e-07	1.28992e-06	8.6519e-07	1.29061e-06	8.65669e-07	0.23528
26	0.18304	0.554539	0.834298	999997347	1353	2.653e-06	1.353e-06	2.61652e-06	1.3336e-06	2.62679e-06	1.33912e-06	2.63205e-06	1.34213e-06	2.63367e-06	1.34306e-06	0.228209
27	0.183041	0.554539	0.82112	999995473	1874	4.527e-06	1.874e-06	4.46193e-06	1.84541e-06	4.48027e-06	1.85348e-06	4.49044e-06	1.85839e-06	4.49373e-06	1.86006e-06	0.222037
28	0.183041	0.554538	0.819393	999992845	2628	7.155e-06	2.62801e-06	7.04734e-06	2.58541e-06	7.07748e-06	2.59721e-06	7.09559e-06	2.60515e-06	7.10194e-06	2.60821e-06	0.233035
29	0.183041	0.554537	0.817898	999989440	3405	1.056e-05	3.40502e-06	1.03939e-05	3.34654e-06	1.04397e-05	3.36225e-06	1.04695e-05	3.3739e-06	1.04809e-05	3.37897e-06	0.235113
30	0.183041	0.554536	0.824521	999985214	4226	1.4786e-05	4.22604e-06	1.45431e-05	4.14923e-06	1.4609e-05	4.16922e-06	1.46547e-05	4.1852e-06	1.46739e-05	4.19299e-06	0.233447
31	0.183042	0.554535	0.820452	999980026	5188	1.9974e-05	5.18808e-06	1.96315e-05	5.08842e-06	1.97226e-05	5.11363e-06	1.97894e-05	5.13477e-06	1.98202e-05	5.14631e-06	0.233787
32	0.183042	0.554534	0.82575	999973795	6231	2.6205e-05	6.23112e-06	2.57363e-05	6.10476e-06	2.58585e-05	6.13595e-06	2.59522e-05	6.16277e-06	2.59993e-05	6.1791e-06	0.232433
33	0.183043	0.554532	0.819212	999966548	7247	3.3452e-05	7.24719e-06	3.28285e-05	7.09224e-06	3.29881e-05	7.12956e-06	3.31143e-05	7.1621e-06	3.31833e-05	7.18399e-06	0.22633
34	0.183044	0.55453	0.82267	999957756	8792	4.2244e-05	8.79229e-06	4.14228e-05	8.59427e-06	4.16291e-05	8.64104e-06	4.17959e-05	8.68162e-06	4.1895e-05	8.71169e-06	0.231964
35	0.183044	0.554528	0.821915	999947470	10286	5.253e-05	1.02864e-05	5.14653e-05	1.00425e-05	5.17283e-05	1.00992e-05	5.19437e-05	1.01478e-05	5.20817e-05	1.01867e-05	0.230935
36	0.183045	0.554525	0.82146	999935187	12283	6.4813e-05	1.22836e-05	6.34424e-05	1.19771e-05	6.37755e-05	1.20472e-05	6.40507e-05	1.21069e-05	6.42386e-05	1.2157e-05	0.236078
37	0.183047	0.554522	0.830913	999921081	14106	7.8919e-05	1.41069e-05	7.71789e-05	1.37366e-05	7.75957e-05	1.38202e-05	7.79415e-05	1.38908e-05	7.81902e-05	1.39515e-05	0.233252
38	0.183048	0.554519	0.826461	999904611	16470	9.5389e-05	1.64713e-05	9.31953e-05	1.60163e-05	9.3714e-05	1.61183e-05	9.41446e-05	1.62031e-05	9.44672e-05	1.62771e-05	0.235296
39	0.183049	0.554515	0.823077	999885659	18952	0.000114341	1.89538e-05	0.000111598	1.8403e-05	0.00011224	1.85258e-05	0.000112771	1.86266e-05	0.000113181	1.87141e-05	0.234765
40	0.183051	0.55451	0.82427	999863339	22320	0.000136661	2.23226e-05	0.000133238	2.16399e-05	0.000134031	2.17916e-05	0.000134686	2.19146e-05	0.000135201	2.20201e-05	0.240478
41	0.183053	0.554504	0.822362	999838509	24830	0.000161491	2.48334e-05	0.000157272	2.40343e-05	0.000158243	2.42116e-05	0.000159039	2.43534e-05	0.000159675	2.44741e-05	0.233311
42	0.183055	0.554498	0.820484	999809639	28870	0.000190361	2.88747e-05	0.000185169	2.78966e-05	0.000186357	2.81139e-05	0.000187324	2.82851e-05	0.000188105	2.84296e-05	0.237147
43	0.183058	0.554491	0.825236	999776889	32750	0.000223111	3.27562e-05	0.000216756	3.15874e-05	0.000218205	3.18479e-05	0.000219375	3.20506e-05	0.000220324	3.22193e-05	0.235677
44	0.183061	0.554482	0.82349	999739302	37587	0.000260698	3.75954e-05	0.000252937	3.61809e-05	0.000254703	3.64981e-05	0.000256117	3.67417e-05	0.000257266	3.69416e-05	0.237419
45	0.183064	0.554473	0.825821	999696579	42723	0.000303421	4.27341e-05	0.000293974	4.10363e-05	0.000296124	4.14212e-05	0.000297828	4.17115e-05	0.000299213	4.19469e-05	0.237287
46	0.183068	0.554462	0.82141	999647797	48782	0.000352203	4.87968e-05	0.00034072	4.67463e-05	0.000343343	4.72188e-05	0.000345395	4.75671e-05	0.000347059	4.78456e-05	0.238625
47	0.183073	0.55445	0.822449	999592298	55499	0.000407702	5.55186e-05	0.000393767	5.30473e-05	0.000396971	5.36279e-05	0.000399441	5.40455e-05	0.000401433	5.43746e-05	0.239472
48	0.183078	0.554437	0.823133	999529731	62567	0.000470269	6.25925e-05	0.000453404	5.96364e-05	0.000457317	6.03459e-05	0.000460284	6.08436e-05	0.000462664	6.12309e-05	0.238488
49	0.183083	0.554421	0.826147	999458936	70795	0.000541064	7.08283e-05	0.000520676	6.72722e-05	0.000525463	6.81466e-05	0.000529028	6.87441e-05	0.000531867	6.92028e-05	0.238725
50	0.18309	0.554403	0.823646	999378295	80641	0.000621705	8.06847e-05	0.000597046	7.63703e-05	0.00060292	7.74573e-05	0.000607212	7.81839e-05	0.000610599	7.87318e-05	0.240901
51	0.183097	0.554383	0.825737	999287555	90740	0.000712445	9.07964e-05	0.000682663	8.56164e-05	0.000689874	8.69534e-05	0.000695044	8.78322e-05	0.000699079	8.84801e-05	0.240482
52	0.183105	0.55436	0.826653	999184841	102714	0.000815159	0.000102787	0.000779181	9.65188e-05	0.00078805	9.81766e-05	0.000794295	9.9251e-05	0.000799103	0.000100024	0.241845
53	0.183115	0.554335	0.82434	999069634	115207	0.000930366	0.000115301	0.000886956	0.000107775	0.000897861	0.000109811	0.000905413	0.000111117	0.000911136	0.000112034	0.241351
54	0.183125	0.554306	0.825599	998938885	130749	0.00106112	0.000130871	0.00100867	0.000121718	0.0010221	0.000124243	0.00103127	0.000125858	0.0010381	0.000126961	0.244083
55	0.183137	0.554274	0.825276	998791849	147036	0.00120815	0.000147192	0.00114483	0.000136153	0.00116135	0.000139249	0.0011725	0.000141231	0.00118065	0.000142556	0.244991
56	0.18315	0.554237	0.822815	998626740	165109	0.00137326	0.000165309	0.00129683	0.000152007	0.00131714	0.000155786	0.00133072	0.000158219	0.00134047	0.000159818	0.245957
57	0.183165	0.554197	0.822063	998442004	184736	0.001558	0.00018499	0.00146585	0.000169013	0.00149073	0.000173594	0.0015073	0.000176575	0.00151898	0.000178508	0.246481
58	0.183181	0.554151	0.824572	998233762	208242	0.00176624	0.000208567	0.00165507	0.000189227	0.00168554	0.000194808	0.00170578	0.000198488	0.00171983	0.000200849	0.24933
59	0.1832	0.5541	0.824182	998000878	232884	0.00199912	0.000233296	0.00186515	0.000210072	0.00190234	0.000216799	0.00192708	0.000221296	0.001944	0.000224172	0.250732
60	0.183221	0.554042	0.82456	997741264	259614	0.00225874	0.000260134	0.0020975	0.000232352	0.00214274	0.000240399	0.00217294	0.000245865	0.00219336	0.000249364	0.25189
61	0.183244	0.553978	0.823378	997450831	290433	0.00254917	0.00029109	0.00235526	0.000257761	0.00241012	0.000267386	0.00244698	0.000274034	0.00247168	0.000278313	0.254542
62	0.18327	0.553907	0.823966	997127286	323545	0.00287271	0.000324372	0.00263984	0.000284579	0.00270613	0.000296008	0.00275101	0.00030403	0.00278093	0.000309252	0.256781
63	0.183299	0.553828	0.823256	996767884	359402	0.00323212	0.000360437	0.00295292	0.000313079	0.00303272	0.000326585	0.00308723	0.000336217	0.0031235	0.000342568	0.258988
64	0.18333	0.553741	0.822694	996370235	397649	0.00362977	0.000398938	0.00329575	0.000342829	0.00339141	0.000358697	0.00345741	0.000370183	0.00350136	0.000377862	0.260914
65	0.183366	0.553644	0.82318	995930262	439973	0.00406974	0.000441576	0.00367088	0.000375136	0.00378519	0.000393771	0.00386482	0.000407408	0.00391803	0.000416672	0.263647
66	0.183405	0.553536	0.824182	995444770	485492	0.00455523	0.000487476	0.00407994	0.000409061	0.00421606	0.000430877	0.00431178	0.000446966	0.00437611	0.000458079	0.266531
67	0.183447	0.553418	0.823598	994909826	534944	0.00509017	0.000537392	0.00452494	0.000445001	0.00468658	0.000470518	0.0048012	0.000489415	0.00487879	0.000502679	0.269947
68	0.183494	0.553288	0.82351	994324108	585718	0.00567589	0.000588715	0.0050055	0.000480555	0.00519681	0.000510225	0.00533343	0.000532236	0.00542672	0.000547933	0.272624
69	0.183546	0.553147	0.824156	993684902	639206	0.0063151	0.000642855	0.00552214	0.000516645	0.00574789	0.000551085	0.00591003	0.000576593	0.00602178	0.000595056	0.275406
70	0.183602	0.552992	0.823709	992987628	697274	0.00701237	0.000701705	0.00607662	0.000554479	0.00634241	0.00059452	0.00653408	0.000624053	0.00666744	0.000645665	0.279121
71	0.183662	0.552824	0.823609	992232457	755171	0.00776754	0.000760504	0.00666658	0.000589958	0.0069787	0.000636284	0.0072043	0.000670218	0.00736269	0.000695244	0.281923
72	0.183728	0.552643	0.823433	991414654	817803	0.00858535	0.000824205	0.00729316	0.00062658	0.007659	0.000680302	0.00792361	0.000719311	0.00811089	0.0007482	0.285819
73	0.183799	0.552446	0.823312	990530758	883896	0.00946924	0.00089155	0.00795606	0.0006629	0.00838419	0.000725197	0.00869358	0.000769971	0.00891408	0.000803187	0.290323
74	0.183876	0.552235	0.822946	989582449	948309	0.0104176	0.000957375	0.0086508	0.000694736	0.00915067	0.00076648	0.00951115	0.000817575	0.00976949	0.000855417	0.293866
75	0.183958	0.552009	0.82285	988566029	1016420	0.011434	0.00102712	0.00937659	0.00072579	0.00995894	0.000808267	0.0103778	0.000866635	0.0106792	0.000909686	0.298308
76	0.184045	0.551767	0.82329	987483567	1082462	0.0125164	0.00109498	0.0101282	0.000751597	0.0108046	0.000845646	0.0112898	0.00091205	0.0116399	0.00096069	0.302028
77	0.184138	0.55151	0.822587	986331830	1151737	0.0136682	0.00116634	0.0109036	0.000775447	0.011687	0.000882432	0.0122479	0.00095809	0.0126529	0.00101303	0.306654
78	0.184237	0.551237	0.82215	985112307	1219523	0.0148877	0.00123642	0.0116973	0.000793635	0.0126016	0.000914612	0.0132485	0.00100056	0.0137152	0.00106234	0.310972
79	0.184341	0.550949	0.822368	983825026	1287281	0.016175	0.00130674	0.0125041	0.000806816	0.0135447	0.000943068	0.014289	0.00104046	0.0148251	0.00110982	0.315473
80	0.184451	0.550644	0.8222	982467009	1358017	0.017533	0.00138034	0.0133206	0.000816481	0.0145144	0.000969712	0.0153689	0.00107991	0.0159829	0.00115789	0.320932
81	0.184566	0.550324	0.822038	981045343	1421666	0.0189547	0.00144704	0.0141368	0.000816285	0.0155015	0.00098712	0.0164795	0.00111064	0.0171808	0.00119785	0.325026
82	0.184687	0.549989	0.822081	979557322	1488021	0.0204427	0.00151677	0.0149486	0.000811708	0.0165034	0.00100186	0.0176196	0.00114008	0.0184186	0.00123783	0.330114
83	0.184813	0.549639	0.82183	978005896	1551426	0.0219941	0.0015838	0.0157478	0.000799256	0.017513	0.00100963	0.0187831	0.00116353	0.0196915	0.00127288	0.334939
84	0.184945	0.549274	0.820787	976391980	1613916	0.023608	0.00165021	0.0165279	0.000780119	0.0185246	0.00101154	0.0199655	0.00118236	0.020996	0.00130446	0.339987
85	0.185081	0.548895	0.821376	974717136	1674844	0.0252829	0.00171534	0.0172821	0.000754191	0.0195315	0.00100697	0.0211614	0.00119595	0.0223278	0.00133185	0.345138
86	0.185224	0.548499	0.821788	972980303	1736833	0.0270197	0.00178188	0.018005	0.000722853	0.0205288	0.000997246	0.0223674	0.00120595	0.0236847	0.00135686	0.350933
87	0.18537	0.548092	0.821	971189829	1790474	0.0288102	0.0018402	0.0186876	0.000682591	0.0215055	0.000976695	0.0235729	0.0012055	0.0250565	0.00137182	0.355483
88	0.185522	0.54767	0.820964	969341188	1848641	0.0306588	0.00190348	0.0193266	0.00063902	0.0224578	0.000952374	0.0247759	0.00120305	0.0264429	0.00138643	0.361365
89	0.185678	0.547235	0.81995	967440681	1900507	0.0325593	0.00196062	0.0199154	0.000588768	0.0233765	0.000918648	0.0259671	0.00119116	0.0278353	0.00139232	0.366435
90	0.185839	0.546787	0.820393	965486763	1953918	0.0345132	0.00201968	0.0204507	0.000535383	0.0242563	0.000879859	0.0271418	0.00117475	0.0292305	0.00139522	0.372211
91	0.186004	0.546326	0.820523	963484829	2001934	0.0365152	0.0020735	0.0209288	0.000478032	0.0250895	0.000833185	0.0282913	0.00114946	0.0306205	0.00139002	0.377352
92	0.186173	0.545854	0.81969	961434390	2050439	0.0385656	0.00212815	0.0213485	0.000419715	0.0258712	0.000781699	0.0294098	0.0011185	0.032001	0.00138053	0.382962
93	0.186347	0.545369	0.8199	959337293	2097097	0.0406627	0.00218122	0.0217099	0.000361372	0.0265961	0.000724904	0.0304902	0.00108037	0.0333658	0.00136474	0.388582
94	0.186524	0.544873	0.818922	957198506	2138787	0.0428015	0.00222944	0.022014	0.000304157	0.0272587	0.000662586	0.031524	0.00103383	0.0347063	0.00134051	0.393621
95	0.186705	0.544366	0.818911	955014467	2184039	0.0449855	0.0022817	0.0222649	0.00025087	0.0278572	0.000598438	0.0325075	0.000983484	0.0360194	0.00131311	0.399633
96	0.18689	0.543847	0.818763	952790105	2224362	0.0472099	0.00232914	0.0224665	0.000201616	0.0283883	0.000531144	0.0334332	0.000925757	0.0372966	0.00127717	0.40504
97	0.187079	0.543319	0.818312	950529067	2261038	0.0494709	0.00237307	0.0226244	0.000157911	0.0288511	0.000462823	0.0342952	0.000861987	0.0385299	0.00123338	0.410065
98	0.187271	0.54278	0.818419	948229046	2300021	0.051771	0.00241973	0.0227453	0.000120843	0.0292475	0.00039634	0.0350903	0.000795048	0.0397149	0.00118491	0.41577
99	0.187467	0.542229	0.818171	945889711	2339335	0.0541103	0.00246706	0.0228355	9.02866e-05	0.0295801	0.000332677	0.035815	0.000724714	0.0408456	0.00113076	0.421777
100	0.187667	0.541669	0.817746	943515099	2374612	0.0564849	0.00251045	0.0229014	6.58124e-05	0.0298529	0.00027276	0.0364657	0.000650656	0.0419149	0.0010693	0.427284
101	0.187869	0.541099	0.817462	941107972	2407127	0.058892	0.00255123	0.0229482	4.68668e-05	0.0300711	0.000218182	0.0370404	0.000574786	0.0429167	0.00100182	0.432506
102	0.188075	0.540518	0.817445	938665299	2442673	0.0613347	0.00259553	0.0229809	3.26463e-05	0.0302417	0.000170596	0.0375404	0.000500003	0.043848	0.000931232	0.438469
103	0.188285	0.539928	0.816701	936188728	2476571	0.0638113	0.0026384	0.023003	2.21405e-05	0.0303718	0.000130119	0.0379672	0.000426763	0.044704	0.000856076	0.44432
104	0.188497	0.539329	0.816175	933681723	2507005	0.0663183	0.00267788	0.0230176	1.45782e-05	0.0304686	9.67579e-05	0.0383237	0.000356521	0.0454807	0.000776658	0.449722
105	0.188713	0.538721	0.815898	931142966	2538757	0.068857	0.00271908	0.0230269	9.31724e-06	0.0305389	7.03617e-05	0.0386153	0.000291614	0.0461763	0.000695632	0.455521
106	0.188931	0.538103	0.815656	928573405	2569561	0.0714266	0.00275958	0.0230327	5.75582e-06	0.0305889	5.00294e-05	0.0388482	0.000232905	0.0467899	0.000613573	0.461299
107	0.189153	0.537476	0.815627	925975772	2597633	0.0740242	0.00279744	0.0230361	3.41589e-06	0.0306237	3.47174e-05	0.0390297	0.000181419	0.0473216	0.000531722	0.466728
108	0.189378	0.536839	0.815305	923347518	2628254	0.0766525	0.00283836	0.023038	1.95805e-06	0.0306472	2.34966e-05	0.0391678	0.000138088	0.0477745	0.000452901	0.472746
109	0.189606	0.536192	0.815193	920691262	2656256	0.0793087	0.00287677	0.0230391	1.0625e-06	0.0306626	1.54461e-05	0.0392703	0.000102518	0.0481523	0.000377746	0.478418
110	0.189836	0.535537	0.814369	918006311	2684951	0.0819937	0.00291623	0.0230396	5.50415e-07	0.0306725	9.85377e-06	0.0393447	7.44134e-05	0.0484607	0.000308407	0.484331
111	0.19007	0.534873	0.814184	915294513	2711798	0.0847055	0.00295401	0.0230399	2.7118e-07	0.0306785	6.07443e-06	0.0393975	5.27987e-05	0.0487065	0.000245797	0.490023
112	0.190307	0.5342	0.813933	912558585	2735928	0.0874414	0.00298912	0.02304	1.23117e-07	0.0306821	3.59775e-06	0.039434	3.65657e-05	0.0488976	0.000191077	0.495327
113	0.190546	0.533519	0.81316	909796627	2761958	0.0902034	0.00302661	0.0230401	5.52392e-08	0.0306842	2.05766e-06	0.0394587	2.46919e-05	0.0490427	0.000145113	0.501072
114	0.190787	0.532829	0.813024	907009252	2787375	0.0929907	0.00306373	0.0230401	1.39369e-08	0.0306853	1.11495e-06	0.0394749	1.62086e-05	0.0491503	0.000107579	0.506801
115	0.191032	0.532129	0.812803	904195115	2814137	0.0958049	0.00310266	0.0230401	0	0.0306859	5.76898e-07	0.0394853	1.03279e-05	0.0492282	7.79938e-05	0.512865
116	0.19128	0.53142	0.812351	901356530	2838585	0.0986435	0.00313935	0.0230401	0	0.0306862	2.83859e-07	0.0394916	6.35843e-06	0.0492835	5.52672e-05	0.518596
117	0.191531	0.530704	0.811695	898494027	2862503	0.101506	0.00317577	0.0230401	0	0.0306863	1.28813e-07	0.0394954	3.76419e-06	0.0493218	3.82574e-05	0.524314
118	0.191783	0.529979	0.81126	895608409	2885618	0.104392	0.00321162	0.0230401	0	0.0306864	5.77124e-08	0.0394975	2.14979e-06	0.0493476	2.57974e-05	0.529964
119	0.192039	0.529244	0.810999	892698854	2909555	0.107301	0.00324869	0.0230401	0	0.0306864	1.45478e-08	0.0394987	1.16382e-06	0.0493645	1.69191e-05	0.535842
120	0.192298	0.528501	0.810655	889767990	2930864	0.110232	0.00328315	0.0230401	0	0.0306864	0	0.0394993	6.00827e-07	0.0493752	1.07563e-05	0.541312
