# Supplementary material for: Quantifying the Potential for Future Gene Therapy to Lower Lifetime Risk of Polygenic Late-Onset Diseases
Source: MDPI journal article supplement (doi:10.3390/ijms20133352), 2019-07-08
Supplement: s2 [file s2 › SuppFiles/Results/LODsCommonLow/ColorectalCancer/-1.000/IndividualsByBetaDistrib.csv]

nEntry	Beta	nDetrimentalCount	nFractionPopulation	nCumulativeFractionPopulation	nEditsNeeded	nIndividuals
0	-19.8	0	0	1	0	0
1	-19.6	0	0	1	0	0
2	-19.4	0	0	1	0	0
3	-19.2	0	0	1	0	0
4	-19	0	0	1	0	0
5	-18.8	0	0	1	0	0
6	-18.6	0	0	1	0	0
7	-18.4	0	0	1	0	0
8	-18.2	0	0	1	0	0
9	-18	0	0	1	0	0
10	-17.8	0	0	1	0	0
11	-17.6	0	0	1	0	0
12	-17.4	0	0	1	0	0
13	-17.2	0	0	1	0	0
14	-17	0	0	1	0	0
15	-16.8	0	0	1	0	0
16	-16.6	0	0	1	0	0
17	-16.4	0	0	1	0	0
18	-16.2	0	0	1	0	0
19	-16	0	0	1	0	0
20	-15.8	0	0	1	0	0
21	-15.6	0	0	1	0	0
22	-15.4	0	0	1	0	0
23	-15.2	0	0	1	0	0
24	-15	0	0	1	0	0
25	-14.8	0	0	1	0	0
26	-14.6	0	0	1	0	0
27	-14.4	0	0	1	0	0
28	-14.2	0	0	1	0	0
29	-14	0	0	1	0	0
30	-13.8	0	0	1	0	0
31	-13.6	0	0	1	0	0
32	-13.4	0	0	1	0	0
33	-13.2	0	0	1	0	0
34	-13	0	0	1	0	0
35	-12.8	0	0	1	0	0
36	-12.6	0	0	1	0	0
37	-12.4	0	0	1	0	0
38	-12.2	0	0	1	0	0
39	-12	0	0	1	0	0
40	-11.8	0	0	1	0	0
41	-11.6	0	0	1	0	0
42	-11.4	0	0	1	0	0
43	-11.2	0	0	1	0	0
44	-11	0	0	1	0	0
45	-10.8	0	0	1	0	0
46	-10.6	0	0	1	0	0
47	-10.4	0	0	1	0	0
48	-10.2	0	0	1	0	0
49	-10	0	0	1	0	0
50	-9.8	0	0	1	0	0
51	-9.6	0	0	1	0	0
52	-9.4	0	0	1	0	0
53	-9.2	0	0	1	0	0
54	-9	0	0	1	0	0
55	-8.8	265	1e-09	1	0	1
56	-8.6	264.67	3e-09	1	0	3
57	-8.4	267.67	3e-09	1	0	3
58	-8.2	267.4	1e-08	0.99999999	0	10
59	-8	269.64	2.2e-08	0.99999998	0	22
60	-7.8	270.18	3.9e-08	0.99999996	0	39
61	-7.6	273.13	7.6e-08	0.99999992	0	76
62	-7.4	273.79	1.6e-07	0.99999985	0	160
63	-7.2	276.16	3.17e-07	0.99999969	0	317
64	-7	277.95	6.64e-07	0.99999937	0	664
65	-6.8	279.94	1.261e-06	0.9999987	0	1261
66	-6.6	281.92	2.469e-06	0.99999744	0	2469
67	-6.4	283.88	4.573e-06	0.99999498	0	4573
68	-6.2	285.8	8.446e-06	0.9999904	0	8446
69	-6	287.76	1.5093e-05	0.99998196	0	15093
70	-5.8	289.64	2.6183e-05	0.99996686	0	26183
71	-5.6	291.5	4.4853e-05	0.99994068	0	44853
72	-5.4	293.46	7.4767e-05	0.99989583	0	74767
73	-5.2	295.36	0.000122623	0.99982106	0	122623
74	-5	297.24	0.000197961	0.99969844	0	197961
75	-4.8	299.14	0.000312326	0.99950048	0	312326
76	-4.6	301.05	0.000483603	0.99918815	0	483603
77	-4.4	302.95	0.000732837	0.99870455	0	732837
78	-4.2	304.86	0.001091902	0.99797171	0	1091902
79	-4	306.76	0.001593432	0.99687981	0	1593432
80	-3.8	308.66	0.002276949	0.99528638	0	2276949
81	-3.6	310.56	0.003195636	0.99300943	0	3195636
82	-3.4	312.45	0.004391355	0.98981379	0	4391355
83	-3.2	314.35	0.005929244	0.98542244	0	5929244
84	-3	316.25	0.007838106	0.97949319	0	7838106
85	-2.8	318.14	0.010167202	0.97165509	0	10167202
86	-2.6	320.04	0.012943602	0.96148788	0	12943602
87	-2.4	321.94	0.016161489	0.94854428	0	16161489
88	-2.2	323.83	0.019816161	0.93238279	0	19816161
89	-2	325.73	0.023815635	0.91256663	0	23815635
90	-1.8	327.62	0.028103912	0.888751	0	28103912
91	-1.6	329.51	0.032524217	0.86064708	0	32524217
92	-1.4	331.4	0.03698135	0.82812287	0	36981350
93	-1.2	333.3	0.04121515	0.79114152	0	41215150
94	-1	335.19	0.045127549	0.74992637	0	45127549
95	-0.8	337.08	0.048481233	0.70479882	0	48481233
96	-0.6	338.97	0.051160213	0.65631759	0	51160213
97	-0.4	340.86	0.052963741	0.60515737	0	52963741
98	-0.2	342.75	0.05385009	0.55219363	0	53850090
99	0	344.64	0.053761481	0.49834354	0	53761481
100	0.2	346.53	0.052716656	0.44458206	1.8884	52716656
101	0.4	348.41	0.050740535	0.3918654	3.7771	50740535
102	0.6	350.3	0.047970589	0.34112487	5.6644	47970589
103	0.8	352.19	0.044530511	0.29315428	7.5511	44530511
104	1	354.07	0.040609292	0.24862377	9.4379	40609292
105	1.2	355.96	0.036368087	0.20801448	11.324	36368087
106	1.4	357.85	0.032004156	0.17164639	13.211	32004156
107	1.6	359.73	0.027650266	0.13964224	15.096	27650266
108	1.8	361.62	0.023482965	0.11199197	16.981	23482965
109	2	363.5	0.019582551	0.088509004	18.864	19582551
110	2.2	365.39	0.016048172	0.068926453	20.75	16048172
111	2.4	367.27	0.012913825	0.052878281	22.634	12913825
112	2.6	369.15	0.010220789	0.039964456	24.516	10220789
113	2.8	371.04	0.007941	0.029743667	26.398	7941000
114	3	372.92	0.006066779	0.021802667	28.281	6066779
115	3.2	374.8	0.004554694	0.015735888	30.166	4554694
116	3.4	376.69	0.003357618	0.011181194	32.051	3357618
117	3.6	378.57	0.002433791	0.007823576	33.933	2433791
118	3.8	380.45	0.001734329	0.005389785	35.816	1734329
119	4	382.33	0.001216526	0.003655456	37.697	1216526
120	4.2	384.22	0.000836184	0.00243893	39.583	836184
121	4.4	386.1	0.000566654	0.001602746	41.462	566654
122	4.6	387.97	0.000377199	0.001036092	43.336	377199
123	4.8	389.88	0.000246362	0.000658893	45.242	246362
124	5	391.73	0.000158829	0.000412531	47.088	158829
125	5.2	393.61	9.991e-05	0.000253702	48.969	99910
126	5.4	395.49	6.2046e-05	0.000153792	50.857	62046
127	5.6	397.37	3.7893e-05	9.1746e-05	52.73	37893
128	5.8	399.18	2.2802e-05	5.3853e-05	54.541	22802
129	6	401.11	1.3427e-05	3.1051e-05	56.475	13427
130	6.2	403.05	7.762e-06	1.7624e-05	58.412	7762
131	6.4	404.76	4.505e-06	9.862e-06	60.121	4505
132	6.6	406.82	2.458e-06	5.357e-06	62.179	2458
133	6.8	408.59	1.329e-06	2.899e-06	63.949	1329
134	7	410.36	7.47e-07	1.57e-06	65.72	747
135	7.2	412.72	3.93e-07	8.23e-07	68.081	393
136	7.4	415.01	2.2e-07	4.3e-07	70.377	220
137	7.6	417.39	1.14e-07	2.1e-07	72.758	114
138	7.8	418.24	4.6e-08	9.6e-08	73.602	46
139	8	419.83	2.9e-08	5e-08	75.191	29
140	8.2	420.71	1.4e-08	2.1e-08	76.077	14
141	8.4	428	3e-09	7e-09	83.363	3
142	8.6	421.5	4e-09	4e-09	76.863	4
143	8.8	0	0	0	0	0
144	9	0	0	0	0	0
145	9.2	0	0	0	0	0
146	9.4	0	0	0	0	0
147	9.6	0	0	0	0	0
148	9.8	0	0	0	0	0
149	10	0	0	0	0	0
150	10.2	0	0	0	0	0
151	10.4	0	0	0	0	0
152	10.6	0	0	0	0	0
153	10.8	0	0	0	0	0
154	11	0	0	0	0	0
155	11.2	0	0	0	0	0
156	11.4	0	0	0	0	0
157	11.6	0	0	0	0	0
158	11.8	0	0	0	0	0
159	12	0	0	0	0	0
160	12.2	0	0	0	0	0
161	12.4	0	0	0	0	0
162	12.6	0	0	0	0	0
163	12.8	0	0	0	0	0
164	13	0	0	0	0	0
165	13.2	0	0	0	0	0
166	13.4	0	0	0	0	0
167	13.6	0	0	0	0	0
168	13.8	0	0	0	0	0
169	14	0	0	0	0	0
170	14.2	0	0	0	0	0
171	14.4	0	0	0	0	0
172	14.6	0	0	0	0	0
173	14.8	0	0	0	0	0
174	15	0	0	0	0	0
175	15.2	0	0	0	0	0
176	15.4	0	0	0	0	0
177	15.6	0	0	0	0	0
178	15.8	0	0	0	0	0
179	16	0	0	0	0	0
180	16.2	0	0	0	0	0
181	16.4	0	0	0	0	0
182	16.6	0	0	0	0	0
183	16.8	0	0	0	0	0
184	17	0	0	0	0	0
185	17.2	0	0	0	0	0
186	17.4	0	0	0	0	0
187	17.6	0	0	0	0	0
188	17.8	0	0	0	0	0
189	18	0	0	0	0	0
190	18.2	0	0	0	0	0
191	18.4	0	0	0	0	0
192	18.6	0	0	0	0	0
193	18.8	0	0	0	0	0
194	19	0	0	0	0	0
195	19.2	0	0	0	0	0
196	19.4	0	0	0	0	0
197	19.6	0	0	0	0	0
198	19.8	0	0	0	0	0
199	20	0	0	0	0	0
