# Supplementary material for: Quantifying the Potential for Future Gene Therapy to Lower Lifetime Risk of Polygenic Late-Onset Diseases
Source: MDPI journal article supplement (doi:10.3390/ijms20133352), 2019-07-08
Supplement: s2 [file s2 › SuppFiles/Results/LODsCommonLow/ColorectalCancer/0.250/FrailtyAnalysis.csv]

Age	Heritability	MeanOR	CaseOR	nControls	nCases	nCumIncidence	nIncidence	nLifeIncidence0	nAbsIncidence0	nLifeIncidence5	nAbsIncidence5	nLifeIncidence10	nAbsIncidence10	nLifeIncidence15	nAbsIncidence15	nIncActDivExp
24	0.398935	0.250008	2.41002	999999544	456	4.56e-07	4.56e-07	4.50275e-07	4.50275e-07	4.51834e-07	4.51834e-07	4.52514e-07	4.52514e-07	4.52737e-07	4.52737e-07	0.262159
25	0.398935	0.250007	2.39414	999998617	927	1.383e-06	9.27e-07	1.36482e-06	9.14546e-07	1.36988e-06	9.1805e-07	1.37227e-06	9.1976e-07	1.37301e-06	9.2027e-07	0.25012
26	0.398934	0.250007	2.38359	999997177	1440	2.823e-06	1.44e-06	2.78418e-06	1.41936e-06	2.79511e-06	1.42523e-06	2.8007e-06	1.42843e-06	2.80243e-06	1.42942e-06	0.242884
27	0.398933	0.250005	2.30687	999994962	2215	5.038e-06	2.21501e-06	4.96539e-06	2.18121e-06	4.98586e-06	2.19075e-06	4.99725e-06	2.19655e-06	5.00095e-06	2.19852e-06	0.262439
28	0.398931	0.250004	2.17879	999992143	2819	7.857e-06	2.81901e-06	7.73871e-06	2.77332e-06	7.77183e-06	2.78598e-06	7.79174e-06	2.79449e-06	7.79872e-06	2.79777e-06	0.249972
29	0.398929	0.250002	2.29656	999988573	3570	1.1427e-05	3.57003e-06	1.12474e-05	3.5087e-06	1.1297e-05	3.52518e-06	1.13291e-05	3.53739e-06	1.13414e-05	3.54271e-06	0.246506
30	0.398927	0.249999	2.32958	999984096	4477	1.5904e-05	4.47705e-06	1.56431e-05	4.39568e-06	1.57139e-05	4.41685e-06	1.57629e-05	4.43377e-06	1.57835e-05	4.44203e-06	0.247312
31	0.398924	0.249996	2.2311	999978523	5573	2.1477e-05	5.57309e-06	2.11091e-05	5.46603e-06	2.1207e-05	5.49311e-06	2.12787e-05	5.51582e-06	2.13117e-05	5.52822e-06	0.251136
32	0.39892	0.249993	2.34934	999971828	6695	2.8172e-05	6.69514e-06	2.76685e-05	6.55936e-06	2.77998e-05	6.59287e-06	2.79004e-05	6.62169e-06	2.79509e-05	6.63923e-06	0.249741
33	0.398916	0.249988	2.29913	999963805	8023	3.6195e-05	8.02323e-06	3.55201e-05	7.85167e-06	3.56928e-05	7.89299e-06	3.58294e-05	7.92901e-06	3.59042e-05	7.95324e-06	0.250565
34	0.398911	0.249983	2.31646	999954426	9379	4.5574e-05	9.37934e-06	4.46882e-05	9.16807e-06	4.49108e-05	9.21796e-06	4.50907e-05	9.26125e-06	4.51975e-05	9.29332e-06	0.247452
35	0.398904	0.249977	2.3434	999943306	11120	5.6694e-05	1.11205e-05	5.55449e-05	1.08567e-05	5.58288e-05	1.0918e-05	5.60613e-05	1.09706e-05	5.62101e-05	1.10126e-05	0.24966
36	0.398897	0.24997	2.31432	999930327	12979	6.9673e-05	1.29797e-05	6.82007e-05	1.26558e-05	6.85587e-05	1.27299e-05	6.88542e-05	1.27929e-05	6.9056e-05	1.28458e-05	0.249456
37	0.398889	0.249961	2.27389	999915169	15158	8.4831e-05	1.51591e-05	8.29617e-05	1.4761e-05	8.34096e-05	1.48509e-05	8.3781e-05	1.49268e-05	8.4048e-05	1.4992e-05	0.250649
38	0.398879	0.249952	2.29105	999897937	17232	0.000102063	1.72335e-05	9.97191e-05	1.67573e-05	0.000100274	1.6864e-05	0.000100734	1.69528e-05	0.000101078	1.70301e-05	0.246183
39	0.398869	0.249941	2.25665	999877794	20143	0.000122206	2.01451e-05	0.000119279	1.95595e-05	0.000119964	1.969e-05	0.000120531	1.97971e-05	0.000120968	1.98901e-05	0.24952
40	0.398856	0.249927	2.31193	999854278	23516	0.000145722	2.35189e-05	0.000142078	2.27995e-05	0.000142923	2.29593e-05	0.00014362	2.30888e-05	0.000144168	2.32001e-05	0.253366
41	0.398841	0.249913	2.26812	999827652	26626	0.000172348	2.66299e-05	0.000167851	2.57728e-05	0.000168886	2.59629e-05	0.000169735	2.61149e-05	0.000170413	2.62443e-05	0.250189
42	0.398825	0.249896	2.29942	999797000	30652	0.000203	3.06573e-05	0.000197469	2.96186e-05	0.000198735	2.98492e-05	0.000199766	3.0031e-05	0.000200597	3.01844e-05	0.251787
43	0.398806	0.249876	2.28157	999762076	34924	0.000237924	3.49311e-05	0.000231154	3.36842e-05	0.000232697	3.3962e-05	0.000233944	3.41782e-05	0.000234955	3.43581e-05	0.251325
44	0.398784	0.249855	2.29785	999722491	39585	0.000277509	3.95944e-05	0.000269258	3.81041e-05	0.000271135	3.84382e-05	0.000272639	3.86947e-05	0.00027386	3.89053e-05	0.250043
45	0.398759	0.249829	2.30127	999677030	45461	0.00032297	4.54736e-05	0.000312924	4.36662e-05	0.000315211	4.40758e-05	0.000317023	4.43847e-05	0.000318496	4.46352e-05	0.252498
46	0.398731	0.249801	2.31661	999625465	51565	0.000374535	5.15817e-05	0.000362337	4.94132e-05	0.000365124	4.99126e-05	0.000367304	5.02808e-05	0.000369071	5.05752e-05	0.252244
47	0.398698	0.249768	2.29668	999566748	58717	0.000433252	5.8739e-05	0.00041846	5.61232e-05	0.000421861	5.67374e-05	0.000424483	5.71792e-05	0.000426598	5.75274e-05	0.253363
48	0.398663	0.249731	2.24696	999500143	66605	0.000499857	6.66339e-05	0.000481945	6.34852e-05	0.000486101	6.42405e-05	0.000489254	6.47704e-05	0.000491781	6.51827e-05	0.253887
49	0.398622	0.24969	2.27036	999424448	75695	0.000575552	7.57329e-05	0.000553874	7.19284e-05	0.000558965	7.28633e-05	0.000562756	7.35021e-05	0.000565773	7.39926e-05	0.255256
50	0.398576	0.249643	2.25362	999338845	85603	0.000661155	8.56523e-05	0.000634943	8.10695e-05	0.000641188	8.22234e-05	0.00064575	8.29947e-05	0.00064935	8.35763e-05	0.255733
51	0.398524	0.249589	2.26904	999242400	96445	0.0007576	9.65088e-05	0.000725943	9.09992e-05	0.000733608	9.24204e-05	0.000739105	9.33544e-05	0.000743393	9.4043e-05	0.255611
52	0.398465	0.24953	2.26656	999133848	108552	0.000866152	0.000108634	0.000827947	0.000102005	0.000837365	0.000103757	0.000843997	0.000104892	0.000849102	0.000105709	0.255602
53	0.3984	0.249463	2.2465	999011577	122271	0.000988423	0.000122377	0.000942331	0.000114383	0.000953909	0.000116544	0.000961927	0.00011793	0.000968005	0.000118903	0.256163
54	0.398326	0.249387	2.24532	998873367	138210	0.00112663	0.000138347	0.00107099	0.000128664	0.00108524	0.000131333	0.00109497	0.00013304	0.00110221	0.000134206	0.258027
55	0.398244	0.249302	2.23052	998718222	155145	0.00128178	0.00015532	0.00121466	0.000143662	0.00123217	0.000146929	0.00124399	0.00014902	0.00125263	0.000150418	0.258519
56	0.398152	0.249207	2.21976	998544828	173394	0.00145517	0.000173617	0.00137429	0.000159634	0.00139577	0.000163603	0.00141015	0.000166158	0.00142047	0.000167838	0.258318
57	0.398049	0.249101	2.22053	998349592	195236	0.00165041	0.000195521	0.00155291	0.000178619	0.00157923	0.00018346	0.00159676	0.000186611	0.00160912	0.000188654	0.260511
58	0.397934	0.248982	2.21545	998131405	218187	0.0018686	0.000218548	0.00175117	0.000198264	0.00178335	0.000204112	0.00180472	0.000207967	0.00181956	0.000210441	0.261261
59	0.397807	0.248849	2.20491	997887942	243463	0.00211206	0.000243919	0.00197079	0.000219615	0.00200999	0.000226647	0.00203607	0.000231348	0.00205392	0.000234355	0.262148
60	0.397664	0.248701	2.19515	997615679	272263	0.00238432	0.000272839	0.00221446	0.000243673	0.0022621	0.000252111	0.00229392	0.000257844	0.00231543	0.000261514	0.264193
61	0.397508	0.248538	2.16809	997313559	302120	0.00268644	0.000302842	0.00248259	0.000268133	0.00254025	0.000278145	0.00257898	0.000285061	0.00260494	0.000289513	0.264818
62	0.397336	0.248358	2.15622	996977792	335767	0.00302221	0.000336671	0.00277792	0.000295329	0.00284744	0.00030719	0.00289449	0.000315515	0.00292588	0.000320934	0.266517
63	0.397145	0.248157	2.15814	996605942	371850	0.00339406	0.000372977	0.00310185	0.000323922	0.00318534	0.000337896	0.00324235	0.000347862	0.00328031	0.000354433	0.267998
64	0.396936	0.247936	2.13934	996194149	411793	0.00380585	0.000413195	0.00345687	0.000355023	0.00355679	0.000371456	0.0036257	0.00038335	0.00367161	0.000391302	0.270238
65	0.396708	0.247695	2.11431	995741305	452844	0.00425869	0.000454574	0.00384298	0.000386111	0.00396208	0.000405291	0.00404503	0.000419327	0.00410047	0.000428861	0.271407
66	0.396459	0.24743	2.10325	995243695	497610	0.0047563	0.000499738	0.00426225	0.000419271	0.00440371	0.000441631	0.00450315	0.000458122	0.00456999	0.000469512	0.273235
67	0.396189	0.247141	2.07747	994696963	546732	0.00530304	0.000549345	0.00471706	0.000454807	0.0048846	0.000480886	0.00500335	0.0005002	0.00508374	0.000513756	0.275952
68	0.395897	0.246827	2.055	994100598	596365	0.0058994	0.000599544	0.00520635	0.000489291	0.0054041	0.0005195	0.00554526	0.000541911	0.00564164	0.000557893	0.277639
69	0.395582	0.246488	2.04102	993453489	647109	0.00654651	0.000650949	0.00572938	0.000523032	0.005962	0.000557899	0.00612899	0.000583721	0.00624405	0.000602413	0.278874
70	0.395245	0.246121	2.01941	992751279	702210	0.00724872	0.000706837	0.00628779	0.000558404	0.00656073	0.000598729	0.00675746	0.000628471	0.00689428	0.000650236	0.281163
71	0.394882	0.245726	2.00276	991991446	759833	0.00800855	0.000765381	0.00688139	0.000593601	0.00720094	0.000640212	0.00743181	0.000674356	0.00759382	0.000699536	0.283731
72	0.394494	0.245303	1.98711	991174206	817240	0.00882579	0.000823838	0.00750753	0.000626149	0.00788077	0.000679833	0.00815063	0.000718816	0.00834151	0.000747685	0.285692
73	0.394083	0.244852	1.96344	990297783	876423	0.00970222	0.000884227	0.00816483	0.000657295	0.00859984	0.000719066	0.00891409	0.000763461	0.0091379	0.000796397	0.287938
74	0.393648	0.244372	1.94037	989359268	938515	0.0106407	0.00094771	0.00885239	0.000687561	0.0093584	0.000758564	0.00972322	0.000809131	0.00998449	0.000846583	0.2909
75	0.393189	0.243864	1.91662	988361207	998061	0.0116388	0.0010088	0.00956507	0.00071268	0.0101521	0.000793668	0.0105742	0.000850982	0.0108777	0.000893255	0.292986
76	0.392708	0.243328	1.89378	987301790	1059417	0.0126982	0.00107189	0.0103007	0.000735596	0.0109797	0.000827643	0.0114668	0.000892633	0.011818	0.000940238	0.295659
77	0.392206	0.242766	1.86731	986182296	1119494	0.0138177	0.00113389	0.0110544	0.000753739	0.0118374	0.000857728	0.0123981	0.000931268	0.0128026	0.000984668	0.298124
78	0.391682	0.242177	1.84716	985003345	1178951	0.0149967	0.00119547	0.0118216	0.000767232	0.0127216	0.000884184	0.0133654	0.000967276	0.0138296	0.001027	0.300672
79	0.391138	0.241564	1.82427	983767599	1235746	0.0162324	0.00125456	0.0125962	0.000774516	0.0136269	0.000905314	0.0143642	0.000998804	0.014895	0.00106539	0.302877
80	0.390576	0.240927	1.79741	982475701	1291898	0.0175243	0.00131321	0.0133729	0.000776728	0.0145494	0.000922499	0.0153915	0.00102733	0.0159965	0.00110152	0.305324
81	0.389995	0.240267	1.77612	981127830	1347871	0.0188722	0.00137191	0.0141468	0.000773914	0.0154853	0.000935881	0.0164445	0.00105299	0.0171322	0.00113568	0.308152
82	0.389398	0.239585	1.75243	979726241	1401589	0.0202738	0.00142855	0.0149114	0.00076456	0.016429	0.000943669	0.0175184	0.00107386	0.0182982	0.00116593	0.310913
83	0.388787	0.238883	1.73059	978276355	1449886	0.0217236	0.00147989	0.0156583	0.000746945	0.0173725	0.00094355	0.0186057	0.00108738	0.0194877	0.00118957	0.312963
84	0.388162	0.238163	1.70665	976775993	1500362	0.023224	0.00153368	0.0163835	0.00072523	0.0183129	0.000940367	0.0197049	0.00109917	0.0207004	0.00121268	0.315979
85	0.387525	0.237427	1.68271	975231825	1544168	0.0247682	0.00158088	0.0170789	0.000695347	0.0192413	0.0009284	0.0208076	0.00110264	0.0219283	0.00122794	0.318084
86	0.386877	0.236675	1.65835	973644009	1587816	0.026356	0.00162814	0.0177397	0.000660833	0.020153	0.000911684	0.02191	0.00110248	0.0231688	0.00124044	0.320654
87	0.38622	0.23591	1.63749	972016742	1627267	0.0279833	0.00167132	0.0183601	0.000620371	0.0210407	0.000887666	0.0230057	0.00109561	0.0244156	0.00124677	0.322859
88	0.385552	0.23513	1.61815	970346937	1669805	0.0296531	0.00171788	0.0189373	0.000577201	0.0219009	0.000860242	0.0240923	0.00108667	0.0256679	0.00125231	0.326129
89	0.384879	0.23434	1.59362	968642681	1704256	0.0313573	0.00175634	0.0194653	0.00052797	0.0227247	0.000823786	0.0251605	0.00106816	0.0269164	0.00124855	0.328255
90	0.384198	0.23354	1.57395	966907715	1734966	0.0330923	0.00179113	0.0199406	0.000475389	0.0235059	0.000781264	0.0262036	0.00104311	0.0281553	0.00123888	0.330091
91	0.383512	0.23273	1.55332	965138645	1769070	0.0348614	0.00182962	0.0203631	0.000422427	0.0242422	0.000736269	0.0272193	0.00101576	0.0293836	0.00122834	0.332968
92	0.382821	0.231913	1.53193	963339665	1798980	0.0366603	0.00186396	0.0207313	0.000368242	0.0249281	0.000685834	0.0282007	0.000981335	0.0305949	0.00121123	0.335421
93	0.382127	0.23109	1.51008	961515102	1824563	0.0384849	0.001894	0.0210457	0.000314409	0.0255587	0.000630697	0.0291407	0.000939969	0.0317822	0.00118738	0.337414
94	0.381431	0.23026	1.49027	959663259	1851843	0.0403367	0.00192596	0.0213091	0.000263351	0.0261324	0.000573692	0.0300358	0.000895125	0.0329429	0.00116066	0.34004
95	0.38073	0.229424	1.47347	957786841	1876418	0.0422132	0.00195529	0.0215246	0.000215535	0.0266466	0.000514148	0.0308807	0.00084496	0.0340711	0.00112816	0.342463
96	0.38003	0.228585	1.45019	955886983	1899858	0.044113	0.00198359	0.0216968	0.000172203	0.0271002	0.000453658	0.0316714	0.000790702	0.0351619	0.00109085	0.344949
97	0.379329	0.227744	1.43229	953969738	1917245	0.0460303	0.00200572	0.0218307	0.0001339	0.0274927	0.00039245	0.0324024	0.000730921	0.0362078	0.00104585	0.346588
98	0.378624	0.226897	1.41695	952029904	1939834	0.0479701	0.00203343	0.0219326	0.000101919	0.027827	0.000334272	0.0330729	0.000670542	0.0372071	0.000999354	0.349395
99	0.377921	0.226049	1.39646	950072256	1957648	0.0499277	0.00205629	0.0220082	7.55554e-05	0.0281054	0.000278397	0.0336794	0.00060647	0.0381534	0.000946268	0.351551
100	0.377219	0.2252	1.37868	948099855	1972401	0.0519001	0.00207605	0.0220628	5.46651e-05	0.0283319	0.00022656	0.0342198	0.000540448	0.0390416	0.000888182	0.353348
101	0.376516	0.224349	1.36366	946111467	1988388	0.0538885	0.00209723	0.0221016	3.87139e-05	0.0285122	0.000180227	0.0346946	0.000474797	0.0398691	0.000827547	0.35554
102	0.375814	0.223498	1.3442	944106724	2004743	0.0558933	0.00211893	0.0221284	2.67934e-05	0.0286522	0.000140011	0.035105	0.000410361	0.0406334	0.000764278	0.357955
103	0.375114	0.222647	1.32734	942087893	2018831	0.0579121	0.00213835	0.0221464	1.80483e-05	0.0287582	0.000106069	0.0354529	0.000347885	0.0413312	0.000697849	0.36011
104	0.374416	0.221796	1.31241	940059496	2028397	0.0599405	0.00215309	0.0221582	1.17951e-05	0.0288365	7.8286e-05	0.0357413	0.000288458	0.0419596	0.000628387	0.361588
105	0.373717	0.220944	1.29753	938015909	2043587	0.0619841	0.00217389	0.0221657	7.49996e-06	0.0288932	5.6638e-05	0.0359761	0.000234737	0.0425196	0.000559953	0.364186
106	0.373021	0.220093	1.28196	935961432	2054477	0.0640386	0.00219024	0.0221703	4.60203e-06	0.0289332	4.00007e-05	0.0361623	0.000186218	0.0430101	0.000490578	0.366127
107	0.372328	0.219244	1.26319	933895297	2066135	0.0661047	0.0022075	0.022173	2.71697e-06	0.0289608	2.76139e-05	0.0363066	0.000144299	0.0434331	0.000422928	0.368301
108	0.371637	0.218396	1.25166	931822599	2072698	0.0681774	0.00221941	0.0221746	1.54416e-06	0.0289793	1.85299e-05	0.0364155	0.0001089	0.0437902	0.000357167	0.369656
109	0.370947	0.217549	1.23655	929740047	2082552	0.07026	0.00223492	0.0221754	8.33021e-07	0.0289914	1.211e-05	0.0364959	8.03761e-05	0.0440864	0.00029616	0.371676
110	0.37026	0.216704	1.22116	927646563	2093484	0.0723534	0.00225169	0.0221758	4.29164e-07	0.0289991	7.68309e-06	0.0365539	5.80209e-05	0.0443269	0.000240468	0.373963
111	0.369575	0.215861	1.2071	925545053	2101510	0.0744549	0.00226542	0.022176	2.10151e-07	0.0290038	4.70738e-06	0.0365948	4.09164e-05	0.0445174	0.000190481	0.375797
112	0.368892	0.215018	1.19384	923434592	2110461	0.0765654	0.00228024	0.0221761	9.49707e-08	0.0290066	2.77526e-06	0.036623	2.82063e-05	0.0446647	0.000147395	0.377857
113	0.368211	0.214179	1.18089	921317678	2116914	0.0786823	0.00229244	0.0221762	4.23383e-08	0.0290082	1.5771e-06	0.0366419	1.89252e-05	0.044776	0.000111223	0.379526
114	0.367534	0.213341	1.16705	919192703	2124975	0.0808073	0.00230645	0.0221762	1.06249e-08	0.029009	8.4999e-07	0.0366543	1.23567e-05	0.044858	8.20134e-05	0.381532
115	0.36686	0.212505	1.15254	917059639	2133064	0.0829404	0.00232058	0.0221762	0	0.0290094	4.37278e-07	0.0366621	7.82834e-06	0.0449171	5.91179e-05	0.38359
116	0.366188	0.211672	1.14135	914921883	2137756	0.0850781	0.0023311	0.0221762	0	0.0290097	2.13776e-07	0.0366669	4.78857e-06	0.0449587	4.16221e-05	0.385079
117	0.36552	0.210843	1.12717	912779395	2142488	0.0872206	0.00234172	0.0221762	0	0.0290098	9.6412e-08	0.0366697	2.81737e-06	0.0449874	2.86344e-05	0.386613
118	0.364853	0.210015	1.1153	910628516	2150879	0.0893715	0.00235641	0.0221762	0	0.0290098	4.30176e-08	0.0366713	1.6024e-06	0.0450066	1.92289e-05	0.388842
119	0.364188	0.20919	1.10587	908475433	2153083	0.0915246	0.00236439	0.0221762	0	0.0290098	1.07654e-08	0.0366722	8.61233e-07	0.0450191	1.25202e-05	0.389985
120	0.363527	0.208368	1.0911	906314422	2161011	0.0936856	0.00237872	0.0221762	0	0.0290098	0	0.0366726	4.43007e-07	0.045027	7.93091e-06	0.392194
