# Supplementary material for: Quantifying the Potential for Future Gene Therapy to Lower Lifetime Risk of Polygenic Late-Onset Diseases
Source: MDPI journal article supplement (doi:10.3390/ijms20133352), 2019-07-08
Supplement: s2 [file s2 › SuppFiles/Results/LODsCommonLow/ColorectalCancer/0.250/IndividualsByBetaDistrib.csv]

nEntry	Beta	nDetrimentalCount	nFractionPopulation	nCumulativeFractionPopulation	nEditsNeeded	nIndividuals
0	-19.8	0	0	1	0	0
1	-19.6	0	0	1	0	0
2	-19.4	0	0	1	0	0
3	-19.2	0	0	1	0	0
4	-19	0	0	1	0	0
5	-18.8	0	0	1	0	0
6	-18.6	0	0	1	0	0
7	-18.4	0	0	1	0	0
8	-18.2	0	0	1	0	0
9	-18	0	0	1	0	0
10	-17.8	0	0	1	0	0
11	-17.6	0	0	1	0	0
12	-17.4	0	0	1	0	0
13	-17.2	0	0	1	0	0
14	-17	0	0	1	0	0
15	-16.8	0	0	1	0	0
16	-16.6	0	0	1	0	0
17	-16.4	0	0	1	0	0
18	-16.2	0	0	1	0	0
19	-16	0	0	1	0	0
20	-15.8	0	0	1	0	0
21	-15.6	0	0	1	0	0
22	-15.4	0	0	1	0	0
23	-15.2	0	0	1	0	0
24	-15	0	0	1	0	0
25	-14.8	0	0	1	0	0
26	-14.6	0	0	1	0	0
27	-14.4	0	0	1	0	0
28	-14.2	0	0	1	0	0
29	-14	0	0	1	0	0
30	-13.8	0	0	1	0	0
31	-13.6	0	0	1	0	0
32	-13.4	0	0	1	0	0
33	-13.2	0	0	1	0	0
34	-13	0	0	1	0	0
35	-12.8	0	0	1	0	0
36	-12.6	0	0	1	0	0
37	-12.4	0	0	1	0	0
38	-12.2	0	0	1	0	0
39	-12	0	0	1	0	0
40	-11.8	0	0	1	0	0
41	-11.6	0	0	1	0	0
42	-11.4	0	0	1	0	0
43	-11.2	0	0	1	0	0
44	-11	0	0	1	0	0
45	-10.8	0	0	1	0	0
46	-10.6	0	0	1	0	0
47	-10.4	0	0	1	0	0
48	-10.2	0	0	1	0	0
49	-10	0	0	1	0	0
50	-9.8	0	0	1	0	0
51	-9.6	0	0	1	0	0
52	-9.4	0	0	1	0	0
53	-9.2	0	0	1	0	0
54	-9	0	0	1	0	0
55	-8.8	0	0	1	0	0
56	-8.6	260	1e-09	1	0	1
57	-8.4	264.33	3e-09	1	0	3
58	-8.2	267	6e-09	1	0	6
59	-8	269.28	2.5e-08	0.99999999	0	25
60	-7.8	270.61	3.8e-08	0.99999996	0	38
61	-7.6	272.28	8.2e-08	0.99999993	0	82
62	-7.4	274.77	1.75e-07	0.99999985	0	175
63	-7.2	276.22	3.21e-07	0.99999967	0	321
64	-7	278.46	6.46e-07	0.99999935	0	646
65	-6.8	280.01	1.388e-06	0.9999987	0	1388
66	-6.6	282.07	2.422e-06	0.99999731	0	2422
67	-6.4	283.92	4.443e-06	0.99999489	0	4443
68	-6.2	285.81	8.218e-06	0.99999045	0	8218
69	-6	287.73	1.5017e-05	0.99998223	0	15017
70	-5.8	289.66	2.5748e-05	0.99996721	0	25748
71	-5.6	291.54	4.4653e-05	0.99994147	0	44653
72	-5.4	293.46	7.4217e-05	0.99989681	0	74217
73	-5.2	295.36	0.000122686	0.9998226	0	122686
74	-5	297.23	0.000197794	0.99969991	0	197794
75	-4.8	299.14	0.000312749	0.99950212	0	312749
76	-4.6	301.05	0.00048306	0.99918937	0	483060
77	-4.4	302.96	0.000734345	0.99870631	0	734345
78	-4.2	304.85	0.001091593	0.99797196	0	1091593
79	-4	306.75	0.00159275	0.99688037	0	1592750
80	-3.8	308.66	0.002275076	0.99528762	0	2275076
81	-3.6	310.56	0.003193052	0.99301254	0	3193052
82	-3.4	312.46	0.004392372	0.98981949	0	4392372
83	-3.2	314.35	0.005925968	0.98542712	0	5925968
84	-3	316.25	0.007836097	0.97950115	0	7836097
85	-2.8	318.15	0.010164578	0.97166505	0	10164578
86	-2.6	320.04	0.012943335	0.96150048	0	12943335
87	-2.4	321.94	0.016161225	0.94855714	0	16161225
88	-2.2	323.83	0.019812498	0.93239592	0	19812498
89	-2	325.73	0.023822528	0.91258342	0	23822528
90	-1.8	327.62	0.028101641	0.88876089	0	28101641
91	-1.6	329.51	0.032522247	0.86065925	0	32522247
92	-1.4	331.4	0.036961841	0.828137	0	36961841
93	-1.2	333.3	0.041225763	0.79117516	0	41225763
94	-1	335.19	0.045114477	0.7499494	0	45114477
95	-0.8	337.08	0.048484308	0.70483492	0	48484308
96	-0.6	338.97	0.05114412	0.65635061	0	51144120
97	-0.4	340.86	0.052971383	0.60520649	0	52971383
98	-0.2	342.75	0.053864767	0.55223511	0	53864767
99	0	344.64	0.053771603	0.49837034	0	53771603
100	0.2	346.52	0.052706232	0.44459874	1.8885	52706232
101	0.4	348.41	0.050740099	0.39189251	3.7777	50740099
102	0.6	350.3	0.047973344	0.34115241	5.6653	47973344
103	0.8	352.19	0.044548248	0.29317907	7.5514	44548248
104	1	354.08	0.040602849	0.24863082	9.4404	40602849
105	1.2	355.96	0.036373431	0.20802797	11.325	36373431
106	1.4	357.85	0.032004046	0.17165454	13.21	32004046
107	1.6	359.73	0.027664325	0.13965049	15.096	27664325
108	1.8	361.62	0.023484411	0.11198617	16.982	23484411
109	2	363.5	0.019576128	0.088501756	18.867	19576128
110	2.2	365.39	0.016042404	0.068925628	20.75	16042404
111	2.4	367.27	0.012917021	0.052883224	22.633	12917021
112	2.6	369.16	0.010213388	0.039966203	24.519	10213388
113	2.8	371.04	0.007945107	0.029752815	26.4	7945107
114	3	372.92	0.006062678	0.021807708	28.283	6062678
115	3.2	374.8	0.004558304	0.01574503	30.168	4558304
116	3.4	376.69	0.00335875	0.011186726	32.053	3358750
117	3.6	378.57	0.002436577	0.007827976	33.934	2436577
118	3.8	380.45	0.001736282	0.005391399	35.813	1736282
119	4	382.34	0.001215023	0.003655117	37.704	1215023
120	4.2	384.22	0.000836522	0.002440094	39.582	836522
121	4.4	386.09	0.000566651	0.001603572	41.458	566651
122	4.6	387.97	0.000377638	0.001036921	43.337	377638
123	4.8	389.84	0.000246359	0.000659283	45.207	246359
124	5	391.74	0.000158381	0.000412924	47.102	158381
125	5.2	393.59	0.000100464	0.000254543	48.956	100464
126	5.4	395.51	6.2116e-05	0.000154079	50.876	62116
127	5.6	397.34	3.8101e-05	9.1963e-05	52.707	38101
128	5.8	399.29	2.2763e-05	5.3862e-05	54.655	22763
129	6	401.16	1.3502e-05	3.1099e-05	56.527	13502
130	6.2	403.07	7.754e-06	1.7597e-05	58.438	7754
131	6.4	404.96	4.424e-06	9.843e-06	60.327	4424
132	6.6	406.82	2.498e-06	5.419e-06	62.183	2498
133	6.8	408.71	1.422e-06	2.921e-06	64.074	1422
134	7	410.65	7.33e-07	1.499e-06	66.019	733
135	7.2	412.75	3.72e-07	7.66e-07	68.114	372
136	7.4	414.75	1.96e-07	3.94e-07	70.114	196
137	7.6	415.89	9.2e-08	1.98e-07	71.255	92
138	7.8	417.12	5.8e-08	1.06e-07	72.485	58
139	8	421.3	2.7e-08	4.8e-08	76.66	27
140	8.2	421.15	1.3e-08	2.1e-08	76.518	13
141	8.4	421	4e-09	8e-09	76.364	4
142	8.6	0	0	4e-09	0	0
143	8.8	431.33	3e-09	4e-09	86.697	3
144	9	435	1e-09	1e-09	90.364	1
145	9.2	0	0	0	0	0
146	9.4	0	0	0	0	0
147	9.6	0	0	0	0	0
148	9.8	0	0	0	0	0
149	10	0	0	0	0	0
150	10.2	0	0	0	0	0
151	10.4	0	0	0	0	0
152	10.6	0	0	0	0	0
153	10.8	0	0	0	0	0
154	11	0	0	0	0	0
155	11.2	0	0	0	0	0
156	11.4	0	0	0	0	0
157	11.6	0	0	0	0	0
158	11.8	0	0	0	0	0
159	12	0	0	0	0	0
160	12.2	0	0	0	0	0
161	12.4	0	0	0	0	0
162	12.6	0	0	0	0	0
163	12.8	0	0	0	0	0
164	13	0	0	0	0	0
165	13.2	0	0	0	0	0
166	13.4	0	0	0	0	0
167	13.6	0	0	0	0	0
168	13.8	0	0	0	0	0
169	14	0	0	0	0	0
170	14.2	0	0	0	0	0
171	14.4	0	0	0	0	0
172	14.6	0	0	0	0	0
173	14.8	0	0	0	0	0
174	15	0	0	0	0	0
175	15.2	0	0	0	0	0
176	15.4	0	0	0	0	0
177	15.6	0	0	0	0	0
178	15.8	0	0	0	0	0
179	16	0	0	0	0	0
180	16.2	0	0	0	0	0
181	16.4	0	0	0	0	0
182	16.6	0	0	0	0	0
183	16.8	0	0	0	0	0
184	17	0	0	0	0	0
185	17.2	0	0	0	0	0
186	17.4	0	0	0	0	0
187	17.6	0	0	0	0	0
188	17.8	0	0	0	0	0
189	18	0	0	0	0	0
190	18.2	0	0	0	0	0
191	18.4	0	0	0	0	0
192	18.6	0	0	0	0	0
193	18.8	0	0	0	0	0
194	19	0	0	0	0	0
195	19.2	0	0	0	0	0
196	19.4	0	0	0	0	0
197	19.6	0	0	0	0	0
198	19.8	0	0	0	0	0
199	20	0	0	0	0	0
