# Supplementary material for: Quantifying the Potential for Future Gene Therapy to Lower Lifetime Risk of Polygenic Late-Onset Diseases
Source: MDPI journal article supplement (doi:10.3390/ijms20133352), 2019-07-08
Supplement: s2 [file s2 › SuppFiles/Results/LODsCommonLow/ColorectalCancer/1.000/FrailtyAnalysis.csv]

Age	Heritability	MeanOR	CaseOR	nControls	nCases	nCumIncidence	nIncidence	nLifeIncidence0	nAbsIncidence0	nLifeIncidence5	nAbsIncidence5	nLifeIncidence10	nAbsIncidence10	nLifeIncidence15	nAbsIncidence15	nIncActDivExp
24	0.39895	1.00002	9.07358	999998189	1811	1.811e-06	1.811e-06	1.78826e-06	1.78826e-06	1.79446e-06	1.79446e-06	1.79715e-06	1.79715e-06	1.79804e-06	1.79804e-06	1.04116
25	0.398948	1.00001	8.90652	999994522	3667	5.478e-06	3.66701e-06	5.406e-06	3.61773e-06	5.42605e-06	3.6316e-06	5.43552e-06	3.63836e-06	5.43842e-06	3.64038e-06	0.989417
26	0.398945	0.999994	9.48879	999988635	5887	1.1365e-05	5.88703e-06	1.12086e-05	5.80261e-06	1.12527e-05	5.8266e-06	1.12752e-05	5.8397e-06	1.12822e-05	5.84376e-06	0.992959
27	0.39894	0.999975	9.42815	999980116	8519	1.9884e-05	8.5191e-06	1.95976e-05	8.38904e-06	1.96784e-05	8.42572e-06	1.97233e-05	8.44804e-06	1.97378e-05	8.45562e-06	1.00936
28	0.398934	0.999951	9.20088	999968995	11121	3.1005e-05	1.11212e-05	3.05384e-05	1.09408e-05	3.06691e-05	1.09907e-05	3.07476e-05	1.10243e-05	3.07751e-05	1.10373e-05	0.986157
29	0.398926	0.999919	9.02631	999954502	14493	4.5498e-05	1.44934e-05	4.47826e-05	1.42442e-05	4.49801e-05	1.4311e-05	4.51082e-05	1.43606e-05	4.51573e-05	1.43822e-05	1.00076
30	0.398917	0.999879	9.25533	999936649	17853	6.3351e-05	1.78538e-05	6.23113e-05	1.75287e-05	6.25933e-05	1.76131e-05	6.27888e-05	1.76806e-05	6.28708e-05	1.77136e-05	0.986244
31	0.398904	0.99983	9.14893	999914451	22198	8.5549e-05	2.21994e-05	8.40832e-05	2.17719e-05	8.44731e-05	2.18798e-05	8.4759e-05	2.19702e-05	8.48905e-05	2.20196e-05	1.00036
32	0.39889	0.99977	9.23485	999887463	26988	0.000112537	2.69903e-05	0.000110524	2.64412e-05	0.000111049	2.65763e-05	0.000111452	2.66925e-05	0.000111654	2.67632e-05	1.00679
33	0.398872	0.999699	9.11731	999855408	32055	0.000144592	3.20586e-05	0.000141895	3.13705e-05	0.000142585	3.15355e-05	0.000143131	3.16795e-05	0.00014343	3.17763e-05	1.00119
34	0.398851	0.999615	9.27351	999817523	37885	0.000182477	3.78905e-05	0.000178928	3.7033e-05	0.000179819	3.72345e-05	0.00018054	3.74094e-05	0.000180969	3.75389e-05	0.999652
35	0.398827	0.999517	9.13689	999773217	44306	0.000226783	4.43141e-05	0.000222185	4.32571e-05	0.000223321	4.35012e-05	0.000224251	4.37107e-05	0.000224847	4.38782e-05	0.994871
36	0.398798	0.999399	9.22794	999720463	52754	0.000279537	5.2766e-05	0.000273625	5.14402e-05	0.000275062	5.17414e-05	0.000276249	5.19978e-05	0.00027706	5.22127e-05	1.0141
37	0.398765	0.999266	9.16376	999660434	60029	0.000339566	6.00458e-05	0.000332082	5.84568e-05	0.000333875	5.88128e-05	0.000335362	5.91133e-05	0.000336432	5.93717e-05	0.992834
38	0.398728	0.999112	9.13505	999590778	69656	0.000409222	6.96797e-05	0.000399819	6.77373e-05	0.000402043	6.81685e-05	0.000403889	6.85272e-05	0.000405271	6.884e-05	0.995388
39	0.398684	0.998934	9.17523	999510508	80270	0.000489492	8.03029e-05	0.000477764	7.79446e-05	0.000480508	7.84647e-05	0.000482781	7.88918e-05	0.000484534	7.92622e-05	0.994644
40	0.398633	0.998729	9.09249	999417441	93067	0.000582559	9.31126e-05	0.000567995	9.02312e-05	0.000571372	9.08636e-05	0.000574158	9.13764e-05	0.00057635	9.18166e-05	1.00309
41	0.398576	0.998495	9.06067	999311383	106058	0.000688617	0.00010612	0.000670654	0.000102659	0.000674788	0.000103417	0.00067818	0.000104022	0.000680888	0.000104538	0.997001
42	0.39851	0.998226	9.0776	999189133	122250	0.000810867	0.000122334	0.000788783	0.000118128	0.000793837	0.000119048	0.000797953	0.000119773	0.000801273	0.000120385	1.00473
43	0.398436	0.99792	9.01763	999050305	138828	0.000949695	0.000138941	0.000922682	0.0001339	0.000928841	0.000135004	0.000933816	0.000135863	0.000937851	0.000136578	0.999662
44	0.398351	0.997572	9.0166	998891787	158518	0.00110821	0.000158669	0.00107527	0.000152588	0.00108277	0.000153926	0.00108877	0.000154953	0.00109365	0.000155796	1.00201
45	0.398255	0.997178	8.90994	998711595	180192	0.00128841	0.000180392	0.00124835	0.000173078	0.00125747	0.000174702	0.0012647	0.000175926	0.00127057	0.000176919	1.00165
46	0.398147	0.996733	8.91617	998508022	203573	0.00149198	0.000203836	0.00144343	0.000195078	0.00145452	0.00019705	0.0014632	0.000198503	0.00147023	0.000199665	0.996793
47	0.398025	0.996226	8.91797	998276232	231790	0.00172377	0.000232136	0.00166498	0.000221551	0.00167849	0.000223975	0.00168892	0.000225719	0.00169733	0.000227094	1.00129
48	0.397888	0.995655	8.78619	998013708	262524	0.00198629	0.000262977	0.0019152	0.000250227	0.0019317	0.000253204	0.00194421	0.000255293	0.00195424	0.000256918	1.00199
49	0.397734	0.995013	8.76478	997717824	295884	0.00228218	0.000296473	0.00219637	0.000281161	0.00221651	0.000284815	0.00223152	0.000287312	0.00224347	0.00028923	0.999255
50	0.397561	0.994291	8.67959	997383455	334369	0.00261655	0.000335134	0.00251303	0.000316661	0.00253768	0.000321168	0.0025557	0.000324181	0.00256993	0.000326453	1.00061
51	0.397368	0.99348	8.64219	997007282	376173	0.00299272	0.00037716	0.00286796	0.000354932	0.00289816	0.000360475	0.00291982	0.000364119	0.00293673	0.000366804	0.998938
52	0.397152	0.99257	8.58333	996583693	423589	0.00341631	0.00042486	0.003266	0.00039804	0.00330303	0.000404877	0.00332913	0.000409308	0.00334923	0.000412495	0.99964
53	0.396914	0.991558	8.483	996109972	473721	0.00389003	0.000475345	0.00370916	0.000443161	0.00375456	0.000451532	0.00378603	0.000456904	0.0038099	0.000460672	0.995006
54	0.396648	0.990423	8.38944	995576186	533786	0.00442381	0.000535871	0.00420608	0.000496917	0.00426179	0.000507225	0.00429985	0.000513817	0.00432822	0.000518322	0.999437
55	0.396352	0.989155	8.33416	994977914	598272	0.00502209	0.00060093	0.00476007	0.000553991	0.00482838	0.000566588	0.0048745	0.000574652	0.00490826	0.000580043	1.00021
56	0.396024	0.987745	8.25268	994309087	668827	0.00569091	0.000672203	0.00537582	0.000615752	0.00545944	0.000631062	0.00551542	0.000640917	0.00555566	0.000647394	1.00015
57	0.395663	0.986182	8.1633	993564320	744767	0.00643568	0.00074903	0.0060572	0.00068138	0.00615928	0.000699846	0.00622729	0.000711867	0.00627531	0.000719657	0.998007
58	0.395264	0.984449	8.05996	992733198	831122	0.0072668	0.000836505	0.00681243	0.000755232	0.00693679	0.000777506	0.00701948	0.000792192	0.00707693	0.000801617	0.999994
59	0.394827	0.982534	7.9625	991809398	923800	0.0081906	0.000930562	0.00764574	0.000833309	0.00779678	0.000859993	0.00789731	0.000877832	0.00796617	0.000889241	1.00011
60	0.394349	0.980425	7.84508	990784535	1024863	0.00921547	0.00103333	0.00856298	0.000917242	0.00874579	0.000949008	0.0088679	0.000970586	0.00895057	0.000984401	1.00058
61	0.393826	0.978108	7.71561	989649226	1135309	0.0103508	0.00114587	0.00957058	0.00100759	0.00979101	0.00104522	0.0099391	0.0010712	0.0100385	0.00108793	1.002
62	0.393259	0.975577	7.60991	988401104	1248122	0.0115989	0.00126118	0.0106684	0.0010978	0.0109329	0.00114189	0.0111119	0.00117284	0.0112315	0.00119299	0.998378
63	0.392641	0.972806	7.49743	987024174	1376930	0.0129758	0.00139309	0.0118678	0.00119946	0.0121841	0.0012512	0.0124	0.0012881	0.0125439	0.00131243	1.00099
64	0.391975	0.969794	7.35989	985514083	1510091	0.0144859	0.00152994	0.0131697	0.00130191	0.0135463	0.00136217	0.0138058	0.00140579	0.0139789	0.00143495	1.00061
65	0.391258	0.966529	7.2286	983862402	1651681	0.0161376	0.00167596	0.014578	0.00140828	0.0150245	0.00147824	0.0153353	0.00152943	0.0155431	0.00156421	1.00065
66	0.39049	0.963005	7.09388	982062973	1799429	0.017937	0.00182894	0.0160942	0.00151614	0.0166215	0.001597	0.0169919	0.00165664	0.0172409	0.00169782	0.999987
67	0.389669	0.959214	6.96073	980108261	1954712	0.0198917	0.00199041	0.0177202	0.00162606	0.0183408	0.0017193	0.0187802	0.00178835	0.0190777	0.00183681	0.999842
68	0.388793	0.955147	6.82369	977990381	2117880	0.0220096	0.00216086	0.0194579	0.00173763	0.0201857	0.00184491	0.0207047	0.0019245	0.021059	0.00198126	1.00066
69	0.387864	0.95081	6.68663	975708610	2281771	0.0242914	0.00233312	0.0213021	0.00184426	0.0221529	0.00196721	0.022763	0.00205826	0.0231831	0.00212417	0.999535
70	0.386884	0.946193	6.54404	973252698	2455912	0.0267473	0.00251705	0.0232551	0.00195297	0.0242469	0.002094	0.024961	0.00219802	0.0254573	0.00227414	1.00122
71	0.385852	0.941311	6.39853	970625599	2627099	0.0293744	0.0026993	0.0253074	0.00205236	0.0264604	0.00221351	0.0272926	0.00233156	0.0278759	0.00241863	1.00064
72	0.384773	0.93617	6.25696	967827226	2798373	0.0321728	0.00288306	0.0274515	0.00214404	0.0287883	0.00232787	0.0297539	0.00246135	0.0304361	0.0025602	0.999793
73	0.383648	0.930773	6.11516	964855252	2971974	0.0351447	0.00307077	0.0296804	0.00222891	0.0312267	0.00243837	0.0323429	0.00258892	0.0331367	0.0027006	0.999959
74	0.382478	0.925136	5.97556	961712958	3142294	0.038287	0.00325675	0.0319825	0.00230206	0.0337665	0.00253979	0.035052	0.0027091	0.0359712	0.00283449	0.99966
75	0.381266	0.919265	5.83868	958401082	3311876	0.0415989	0.00344373	0.0343473	0.00236489	0.0364001	0.00263364	0.0378758	0.00282382	0.0389353	0.0029641	1.00017
76	0.380015	0.913181	5.69855	954925833	3475249	0.0450742	0.00362609	0.0367603	0.002413	0.0391151	0.00271495	0.0408039	0.00292814	0.0420196	0.0030843	1.00018
77	0.37873	0.906901	5.57001	951295139	3630694	0.0487049	0.00380207	0.0392048	0.00244449	0.0418968	0.00278175	0.0438242	0.00302025	0.045213	0.00319343	0.999643
78	0.377414	0.90044	5.43661	947512470	3782669	0.0524875	0.00397634	0.0416665	0.00246167	0.0447337	0.00283691	0.0469277	0.00310351	0.0485082	0.00329512	1.00009
79	0.376069	0.893814	5.3082	943584180	3928290	0.0564158	0.0041459	0.0441286	0.0024621	0.0476116	0.00287788	0.0501027	0.00317508	0.0518949	0.00338674	1.00091
80	0.374704	0.887058	5.18112	939527540	4056640	0.0604725	0.00429918	0.0465676	0.00243897	0.0505083	0.0028967	0.0533286	0.00322588	0.0553537	0.00345883	0.999565
81	0.373319	0.880177	5.05595	935342329	4185211	0.0646577	0.00445459	0.0489706	0.00240304	0.0534143	0.00290596	0.0565982	0.00326959	0.0588801	0.00352633	1.00057
82	0.371916	0.873197	4.94235	931045995	4296334	0.068954	0.00459333	0.0513142	0.00234363	0.0563069	0.00289266	0.05989	0.00329174	0.062454	0.00357397	0.999704
83	0.3705	0.866129	4.82418	926640461	4405534	0.0733595	0.00473181	0.0535839	0.00226962	0.0591739	0.00286701	0.063194	0.00330404	0.0660686	0.00361454	1.00067
84	0.369076	0.859007	4.70965	922143691	4496770	0.0778563	0.00485277	0.0557575	0.0021736	0.0619923	0.0028184	0.0664884	0.00329436	0.0697031	0.00363456	0.999799
85	0.367645	0.851837	4.59826	917559681	4584010	0.0824403	0.00497104	0.0578217	0.0020642	0.0647484	0.00275604	0.0697616	0.00327328	0.0733484	0.00364525	1.00021
86	0.366211	0.844634	4.49584	912899049	4660632	0.087101	0.00507938	0.0597614	0.00193971	0.0674244	0.00267602	0.0729977	0.00323606	0.0769894	0.003641	1.00036
87	0.364776	0.83742	4.39112	908173745	4725304	0.0918263	0.00517615	0.0615628	0.00180145	0.070002	0.00257763	0.0761792	0.00318148	0.0806098	0.00362041	0.999911
88	0.363344	0.830209	4.29098	903391923	4781822	0.0966081	0.00526532	0.0632158	0.00165293	0.0724655	0.00246348	0.0792911	0.00311189	0.084196	0.00358625	0.99959
89	0.361916	0.823008	4.19154	898557397	4834526	0.101443	0.00535153	0.0647135	0.00149771	0.0748024	0.00233686	0.0823212	0.00303009	0.0877378	0.0035418	1.00019
90	0.360494	0.815831	4.09945	893682391	4875006	0.106318	0.00542537	0.0660493	0.00133578	0.0769976	0.00219524	0.0852522	0.002931	0.0912189	0.00348107	0.999853
91	0.359079	0.808683	4.00963	888770274	4912117	0.11123	0.00549649	0.0672222	0.00117294	0.079042	0.00204437	0.0880726	0.00282041	0.0946296	0.00341068	1.0003
92	0.35767	0.801573	3.92532	883829576	4940698	0.11617	0.00555903	0.0682335	0.00101134	0.0809255	0.00188357	0.0907677	0.00269513	0.0979561	0.0033265	1.00035
93	0.356273	0.794513	3.83926	878866494	4963082	0.121134	0.00561543	0.0690888	0.000855238	0.0826411	0.00171559	0.0933246	0.00255686	0.101186	0.00322985	1.00038
94	0.354886	0.787512	3.75856	873889136	4977358	0.126111	0.00566338	0.0697966	0.00070783	0.0841831	0.00154196	0.0957305	0.00240591	0.104306	0.00311961	0.999903
95	0.353512	0.780568	3.68093	868899052	4990084	0.131101	0.0057102	0.0703698	0.000573186	0.0855504	0.00136731	0.0979775	0.00224706	0.107306	0.00300019	1.00012
96	0.35215	0.773691	3.60441	863901644	4997408	0.136098	0.00575143	0.0708228	0.000452965	0.0867437	0.00119331	0.100057	0.00207987	0.110175	0.00286939	1.00018
97	0.350805	0.766892	3.52736	858904480	4997164	0.141096	0.00578441	0.0711718	0.000349002	0.0877666	0.00102289	0.101962	0.00190509	0.112901	0.00272593	0.999543
98	0.349471	0.760156	3.45966	853904302	5000178	0.146096	0.00582158	0.0714345	0.000262709	0.0886282	0.000861631	0.103691	0.00172841	0.115477	0.00257597	1.00029
99	0.348151	0.753495	3.3908	848907772	4996530	0.151092	0.00585139	0.0716273	0.000192841	0.0893388	0.000710557	0.105239	0.0015479	0.117892	0.00241517	1.00038
100	0.346845	0.746908	3.32658	843917523	4990249	0.156082	0.00587843	0.0717656	0.000138305	0.089912	0.000573205	0.106606	0.00136735	0.120139	0.00224713	1.00052
101	0.345555	0.740402	3.26209	838939336	4978187	0.161061	0.0058989	0.0718625	9.69253e-05	0.0903632	0.000451223	0.107795	0.00118872	0.122211	0.00207187	1.00003
102	0.344281	0.733985	3.19967	833979190	4960146	0.166021	0.0059124	0.0719288	6.62924e-05	0.0907096	0.000346417	0.10881	0.00101532	0.124102	0.00189098	0.998795
103	0.343019	0.727637	3.13971	829024209	4954981	0.170976	0.00594137	0.0719731	4.42975e-05	0.09097	0.000260335	0.109664	0.000853842	0.125815	0.00171279	1.00056
104	0.341773	0.721375	3.0811	824088966	4935243	0.175911	0.00595307	0.0720018	2.86984e-05	0.0911604	0.000190476	0.110366	0.000701841	0.127344	0.00152891	0.999756
105	0.340541	0.715189	3.0266	819169786	4919180	0.18083	0.00596923	0.0720199	1.80534e-05	0.0912968	0.000136335	0.110931	0.000565042	0.128692	0.00134788	1.00001
106	0.339324	0.709084	2.97111	814268081	4901705	0.185732	0.00598375	0.0720309	1.09798e-05	0.0913922	9.54362e-05	0.111375	0.000444291	0.129862	0.00117045	1.00026
107	0.338122	0.703062	2.91943	809390079	4878002	0.19061	0.00599066	0.0720373	6.41457e-06	0.0914574	6.51945e-05	0.111716	0.00034068	0.130861	0.000998503	0.999486
108	0.336934	0.697119	2.86705	804530644	4859435	0.195469	0.00600382	0.0720409	3.62028e-06	0.0915008	4.34433e-05	0.111971	0.000255315	0.131698	0.000837378	0.999972
109	0.33576	0.691255	2.81834	799695550	4835094	0.200304	0.00600983	0.0720428	1.93404e-06	0.091529	2.81161e-05	0.112158	0.00018661	0.132386	0.000687599	0.999459
110	0.334599	0.685463	2.76927	794876049	4819501	0.205124	0.00602667	0.0720438	9.87998e-07	0.0915466	1.76876e-05	0.112291	0.000133572	0.132939	0.000553592	1.00092
111	0.333453	0.67975	2.72271	790082107	4793942	0.209918	0.00603106	0.0720443	4.79394e-07	0.0915574	1.07384e-05	0.112385	9.33381e-05	0.133374	0.000434523	1.00046
112	0.332321	0.674119	2.67699	785316195	4765912	0.214684	0.00603217	0.0720445	2.14466e-07	0.0915637	6.26717e-06	0.112448	6.36964e-05	0.133707	0.000332851	0.99959
113	0.331201	0.668558	2.63439	780571938	4744257	0.219428	0.00604121	0.0720446	9.48851e-08	0.0915672	3.53447e-06	0.112491	4.24137e-05	0.133956	0.000249263	1.00016
114	0.330096	0.663073	2.59101	775854023	4717915	0.224146	0.00604418	0.0720446	2.35896e-08	0.0915691	1.88717e-06	0.112518	2.74347e-05	0.134138	0.000182088	0.999824
115	0.329002	0.657656	2.54994	771157292	4696731	0.228843	0.00605363	0.0720446	0	0.09157	9.6283e-07	0.112535	1.7237e-05	0.134268	0.00013017	1.00066
116	0.327923	0.652317	2.50945	766492169	4665123	0.233508	0.00604951	0.0720446	0	0.0915705	4.66512e-07	0.112546	1.04499e-05	0.134359	9.08299e-05	0.999332
117	0.326856	0.647043	2.4703	761847253	4644916	0.238153	0.00605997	0.0720446	0	0.0915707	2.09021e-07	0.112552	6.10806e-06	0.134421	6.20793e-05	1.00049
118	0.325799	0.641835	2.43332	757227707	4619546	0.242772	0.00606361	0.0720446	0	0.0915708	9.23909e-08	0.112555	3.44156e-06	0.134462	4.12987e-05	1.00058
119	0.324757	0.636703	2.39277	752635908	4591799	0.247364	0.00606396	0.0720446	0	0.0915708	2.2959e-08	0.112557	1.83672e-06	0.134489	2.67013e-05	1.0002
120	0.323725	0.631631	2.36019	748069178	4566730	0.251931	0.00606765	0.0720446	0	0.0915708	0	0.112558	9.3618e-07	0.134506	1.67599e-05	1.00041
