# Supplementary material for: Quantifying the Potential for Future Gene Therapy to Lower Lifetime Risk of Polygenic Late-Onset Diseases
Source: MDPI journal article supplement (doi:10.3390/ijms20133352), 2019-07-08
Supplement: s2 [file s2 › SuppFiles/Results/LODsCommonLow/ColorectalCancer/1.000/IndividualsByBetaDistrib.csv]

nEntry	Beta	nDetrimentalCount	nFractionPopulation	nCumulativeFractionPopulation	nEditsNeeded	nIndividuals
0	-19.8	0	0	1	0	0
1	-19.6	0	0	1	0	0
2	-19.4	0	0	1	0	0
3	-19.2	0	0	1	0	0
4	-19	0	0	1	0	0
5	-18.8	0	0	1	0	0
6	-18.6	0	0	1	0	0
7	-18.4	0	0	1	0	0
8	-18.2	0	0	1	0	0
9	-18	0	0	1	0	0
10	-17.8	0	0	1	0	0
11	-17.6	0	0	1	0	0
12	-17.4	0	0	1	0	0
13	-17.2	0	0	1	0	0
14	-17	0	0	1	0	0
15	-16.8	0	0	1	0	0
16	-16.6	0	0	1	0	0
17	-16.4	0	0	1	0	0
18	-16.2	0	0	1	0	0
19	-16	0	0	1	0	0
20	-15.8	0	0	1	0	0
21	-15.6	0	0	1	0	0
22	-15.4	0	0	1	0	0
23	-15.2	0	0	1	0	0
24	-15	0	0	1	0	0
25	-14.8	0	0	1	0	0
26	-14.6	0	0	1	0	0
27	-14.4	0	0	1	0	0
28	-14.2	0	0	1	0	0
29	-14	0	0	1	0	0
30	-13.8	0	0	1	0	0
31	-13.6	0	0	1	0	0
32	-13.4	0	0	1	0	0
33	-13.2	0	0	1	0	0
34	-13	0	0	1	0	0
35	-12.8	0	0	1	0	0
36	-12.6	0	0	1	0	0
37	-12.4	0	0	1	0	0
38	-12.2	0	0	1	0	0
39	-12	0	0	1	0	0
40	-11.8	0	0	1	0	0
41	-11.6	0	0	1	0	0
42	-11.4	0	0	1	0	0
43	-11.2	0	0	1	0	0
44	-11	0	0	1	0	0
45	-10.8	0	0	1	0	0
46	-10.6	0	0	1	0	0
47	-10.4	0	0	1	0	0
48	-10.2	0	0	1	0	0
49	-10	0	0	1	0	0
50	-9.8	0	0	1	0	0
51	-9.6	0	0	1	0	0
52	-9.4	0	0	1	0	0
53	-9.2	0	0	1	0	0
54	-9	0	0	1	0	0
55	-8.8	264	1e-09	1	0	1
56	-8.6	263	6e-09	1	0	6
57	-8.4	264.5	4e-09	0.99999999	0	4
58	-8.2	267.33	3e-09	0.99999999	0	3
59	-8	268.31	1.6e-08	0.99999999	0	16
60	-7.8	270.14	3.7e-08	0.99999997	0	37
61	-7.6	272.45	9.8e-08	0.99999993	0	98
62	-7.4	274.26	1.47e-07	0.99999984	0	147
63	-7.2	276.12	3.26e-07	0.99999969	0	326
64	-7	278.18	6.76e-07	0.99999936	0	676
65	-6.8	279.92	1.192e-06	0.99999869	0	1192
66	-6.6	282.15	2.486e-06	0.99999749	0	2486
67	-6.4	283.85	4.556e-06	0.99999501	0	4556
68	-6.2	285.87	8.271e-06	0.99999045	0	8271
69	-6	287.69	1.4937e-05	0.99998218	0	14937
70	-5.8	289.65	2.5507e-05	0.99996724	0	25507
71	-5.6	291.54	4.3982e-05	0.99994174	0	43982
72	-5.4	293.39	7.5068e-05	0.99989775	0	75068
73	-5.2	295.36	0.000122584	0.99982269	0	122584
74	-5	297.23	0.00019734	0.9997001	0	197340
75	-4.8	299.16	0.000312712	0.99950276	0	312712
76	-4.6	301.06	0.000483743	0.99919005	0	483743
77	-4.4	302.95	0.000733973	0.99870631	0	733973
78	-4.2	304.86	0.001090094	0.99797234	0	1090094
79	-4	306.75	0.001592159	0.99688224	0	1592159
80	-3.8	308.66	0.002278753	0.99529008	0	2278753
81	-3.6	310.55	0.003194846	0.99301133	0	3194846
82	-3.4	312.46	0.004391455	0.98981648	0	4391455
83	-3.2	314.35	0.005922937	0.98542503	0	5922937
84	-3	316.25	0.007834187	0.97950209	0	7834187
85	-2.8	318.15	0.01016271	0.9716679	0	10162710
86	-2.6	320.04	0.012945188	0.96150519	0	12945188
87	-2.4	321.94	0.016166725	0.94856001	0	16166725
88	-2.2	323.83	0.019817597	0.93239328	0	19817597
89	-2	325.73	0.023820163	0.91257568	0	23820163
90	-1.8	327.62	0.028093708	0.88875552	0	28093708
91	-1.6	329.51	0.032534619	0.86066181	0	32534619
92	-1.4	331.4	0.036950615	0.82812719	0	36950615
93	-1.2	333.3	0.041237415	0.79117658	0	41237415
94	-1	335.19	0.045135429	0.74993916	0	45135429
95	-0.8	337.08	0.048486298	0.70480374	0	48486298
96	-0.6	338.97	0.051139302	0.65631744	0	51139302
97	-0.4	340.86	0.052969254	0.60517813	0	52969254
98	-0.2	342.75	0.053857891	0.55220888	0	53857891
99	0	344.64	0.053773052	0.49835099	0	53773052
100	0.2	346.53	0.052703486	0.44457794	1.8878	52703486
101	0.4	348.41	0.050734518	0.39187445	3.7744	50734518
102	0.6	350.3	0.047967263	0.34113993	5.6645	47967263
103	0.8	352.19	0.044534741	0.29317267	7.5504	44534741
104	1	354.08	0.040610969	0.24863793	9.4382	40610969
105	1.2	355.96	0.036368202	0.20802696	11.324	36368202
106	1.4	357.85	0.031994356	0.17165876	13.21	31994356
107	1.6	359.73	0.027653965	0.1396644	15.097	27653965
108	1.8	361.62	0.023475287	0.11201044	16.981	23475287
109	2	363.5	0.019588314	0.088535151	18.864	19588314
110	2.2	365.39	0.016047816	0.068946837	20.75	16047816
111	2.4	367.27	0.012918719	0.052899021	22.632	12918719
112	2.6	369.16	0.010224097	0.039980302	24.519	10224097
113	2.8	371.04	0.007943773	0.029756205	26.401	7943773
114	3	372.92	0.006065769	0.021812432	28.286	6065769
115	3.2	374.8	0.004556531	0.015746663	30.165	4556531
116	3.4	376.69	0.00336024	0.011190132	32.049	3360240
117	3.6	378.57	0.002436833	0.007829892	33.93	2436833
118	3.8	380.45	0.00173753	0.005393059	35.814	1737530
119	4	382.34	0.001215469	0.003655529	37.703	1215469
120	4.2	384.21	0.000836581	0.00244006	39.574	836581
121	4.4	386.1	0.000567311	0.001603479	41.46	567311
122	4.6	387.98	0.0003776	0.001036168	43.339	377600
123	4.8	389.85	0.000246947	0.000658568	45.208	246947
124	5	391.76	0.000157727	0.000411621	47.123	157727
125	5.2	393.63	9.952e-05	0.000253894	48.991	99520
126	5.4	395.49	6.2415e-05	0.000154374	50.854	62415
127	5.6	397.37	3.7873e-05	9.1959e-05	52.731	37873
128	5.8	399.25	2.2624e-05	5.4086e-05	54.615	22624
129	6	401.17	1.3528e-05	3.1462e-05	56.529	13528
130	6.2	403.03	8.004e-06	1.7934e-05	58.39	8004
131	6.4	405.01	4.473e-06	9.93e-06	60.369	4473
132	6.6	406.79	2.486e-06	5.457e-06	62.157	2486
133	6.8	408.65	1.381e-06	2.971e-06	64.008	1381
134	7	410.77	7.14e-07	1.59e-06	66.134	714
135	7.2	412.35	4.18e-07	8.76e-07	67.712	418
136	7.4	413.63	2.19e-07	4.58e-07	68.988	219
137	7.6	415.63	1.26e-07	2.39e-07	70.998	126
138	7.8	418.75	5.3e-08	1.13e-07	74.117	53
139	8	419.44	3.2e-08	6e-08	74.8	32
140	8.2	419	1.2e-08	2.8e-08	74.363	12
141	8.4	422.11	9e-09	1.6e-08	77.474	9
142	8.6	419	2e-09	7e-09	74.363	2
143	8.8	427	1e-09	5e-09	82.363	1
144	9	429.33	3e-09	4e-09	84.696	3
145	9.2	0	0	1e-09	0	0
146	9.4	0	0	1e-09	0	0
147	9.6	0	0	1e-09	0	0
148	9.8	435	1e-09	1e-09	90.363	1
149	10	0	0	0	0	0
150	10.2	0	0	0	0	0
151	10.4	0	0	0	0	0
152	10.6	0	0	0	0	0
153	10.8	0	0	0	0	0
154	11	0	0	0	0	0
155	11.2	0	0	0	0	0
156	11.4	0	0	0	0	0
157	11.6	0	0	0	0	0
158	11.8	0	0	0	0	0
159	12	0	0	0	0	0
160	12.2	0	0	0	0	0
161	12.4	0	0	0	0	0
162	12.6	0	0	0	0	0
163	12.8	0	0	0	0	0
164	13	0	0	0	0	0
165	13.2	0	0	0	0	0
166	13.4	0	0	0	0	0
167	13.6	0	0	0	0	0
168	13.8	0	0	0	0	0
169	14	0	0	0	0	0
170	14.2	0	0	0	0	0
171	14.4	0	0	0	0	0
172	14.6	0	0	0	0	0
173	14.8	0	0	0	0	0
174	15	0	0	0	0	0
175	15.2	0	0	0	0	0
176	15.4	0	0	0	0	0
177	15.6	0	0	0	0	0
178	15.8	0	0	0	0	0
179	16	0	0	0	0	0
180	16.2	0	0	0	0	0
181	16.4	0	0	0	0	0
182	16.6	0	0	0	0	0
183	16.8	0	0	0	0	0
184	17	0	0	0	0	0
185	17.2	0	0	0	0	0
186	17.4	0	0	0	0	0
187	17.6	0	0	0	0	0
188	17.8	0	0	0	0	0
189	18	0	0	0	0	0
190	18.2	0	0	0	0	0
191	18.4	0	0	0	0	0
192	18.6	0	0	0	0	0
193	18.8	0	0	0	0	0
194	19	0	0	0	0	0
195	19.2	0	0	0	0	0
196	19.4	0	0	0	0	0
197	19.6	0	0	0	0	0
198	19.8	0	0	0	0	0
199	20	0	0	0	0	0
