# Supplementary material for: Quantifying the Potential for Future Gene Therapy to Lower Lifetime Risk of Polygenic Late-Onset Diseases
Source: MDPI journal article supplement (doi:10.3390/ijms20133352), 2019-07-08
Supplement: s2 [file s2 › SuppFiles/Results/LODsCommonLow/ColorectalCancer/1.000/ScatterData.csv]

Age	OR	Beta
36	0.2334	-1.455
37	84.28	4.4341
37	2.7593	1.015
39	3.9976	1.3857
40	3.8623	1.3513
40	12.509	2.5264
43	3.3092	1.1967
44	2.2838	0.82583
44	23.238	3.1458
45	6.7911	1.9156
45	37.774	3.6316
46	12.296	2.5092
47	13.272	2.5857
47	0.49578	-0.70162
47	3.9119	1.364
48	14.62	2.6824
48	1.0329	0.032356
49	174.16	5.16
49	0.51543	-0.66275
49	63.295	4.1478
50	10.602	2.3611
50	2.2942	0.83037
50	21.74	3.0791
51	10.33	2.335
51	12.063	2.4901
51	13.414	2.5963
52	2.6108	0.95964
52	2.3816	0.86776
52	66.802	4.2017
53	2.4245	0.88561
53	17.591	2.8674
54	1.7656	0.56851
54	1.9052	0.64456
54	120.63	4.7927
54	2.0845	0.73453
54	9.7105	2.2732
54	3.6855	1.3044
54	5.7386	1.7472
54	9.8946	2.292
55	96.235	4.5668
55	10.007	2.3033
55	68.727	4.2301
55	1.9254	0.65515
55	103.38	4.6384
56	54.472	3.9977
56	0.66409	-0.40934
56	38.048	3.6388
56	48.845	3.8887
56	4.7513	1.5584
56	0.30902	-1.1744
56	15.93	2.7682
57	5.1476	1.6385
57	0.91253	-0.091539
57	1.6046	0.47286
57	16.078	2.7775
57	10.197	2.3221
57	8.0156	2.0814
57	23.111	3.1403
57	6.0081	1.7931
57	11.249	2.4203
57	12.036	2.4879
58	2.4736	0.90566
58	14.903	2.7016
58	10.09	2.3115
58	3.1771	1.156
58	4.9229	1.5939
58	91.572	4.5171
58	3.7316	1.3168
58	0.68161	-0.3833
58	6.0624	1.8021
58	0.12302	-2.0954
59	0.81928	-0.19933
59	0.51199	-0.66946
59	1.9269	0.65592
59	1.1718	0.15853
59	22.84	3.1285
59	9.1569	2.2145
59	3.1861	1.1588
59	15.25	2.7246
60	3.3323	1.2037
60	17.431	2.8583
60	6.2519	1.8329
60	9.7092	2.2731
60	3.5069	1.2547
60	4.1818	1.4307
60	0.47094	-0.75303
61	34.369	3.5372
61	4.0763	1.4052
61	3.8648	1.3519
61	42.589	3.7516
61	4.9691	1.6032
61	0.6793	-0.38669
61	4.4316	1.4888
61	3.3961	1.2226
61	5.6675	1.7347
61	2.0163	0.70125
62	15.78	2.7587
62	3.1749	1.1553
62	370.19	5.914
62	8.1729	2.1008
62	2.0864	0.73546
62	6.2426	1.8314
62	2.3086	0.83665
62	29.825	3.3953
62	28.025	3.3331
62	158.07	5.0631
63	7.0992	1.96
63	31.679	3.4556
63	1.7648	0.56806
63	10.132	2.3157
63	1.8788	0.63063
63	6.8796	1.9286
63	4.743	1.5567
63	7.4339	2.0061
63	44.039	3.7851
63	12.538	2.5287
63	5.4184	1.6898
63	50.391	3.9198
63	0.92689	-0.075924
63	65.74	4.1857
64	2.0677	0.72644
64	138.35	4.9298
64	17.577	2.8666
64	49.62	3.9044
64	2.2916	0.82923
64	16.34	2.7936
64	0.20212	-1.5989
64	3.7736	1.328
64	0.99156	-0.0084733
64	5.9585	1.7848
64	0.26601	-1.3242
64	7.9577	2.0741
65	32.294	3.4749
65	20.457	3.0183
65	0.94162	-0.060148
65	1.5667	0.44897
65	4.1466	1.4223
65	2.0574	0.72143
65	44.164	3.7879
65	14.02	2.6405
65	0.92939	-0.073223
65	6.0759	1.8043
65	4.122	1.4163
65	46.84	3.8467
65	2.1087	0.74608
65	12.071	2.4908
66	23.883	3.1732
66	3.9854	1.3826
66	16.607	2.8098
66	11.252	2.4205
66	3.7487	1.3214
66	2.6401	0.97082
66	7.2577	1.9821
66	8.4359	2.1325
66	7.8035	2.0546
66	38.163	3.6419
66	2.4414	0.89256
66	4.9855	1.6065
66	18.592	2.9227
66	8.2564	2.111
66	4.4016	1.482
66	42.85	3.7577
67	16.425	2.7988
67	14.49	2.6734
67	62.419	4.1339
67	6.2934	1.8395
67	11.756	2.4643
67	21.917	3.0873
67	2.6458	0.97296
67	1.9588	0.67233
67	27.806	3.3253
67	4.6272	1.5319
67	26.847	3.2902
67	3.1746	1.1552
67	1.3519	0.30151
67	4.9437	1.5981
67	47.985	3.8709
68	71.15	4.2648
68	2.2426	0.80764
68	9.0603	2.2039
68	41.606	3.7282
68	19.81	2.9862
68	187.4	5.2332
68	22.119	3.0964
68	2.9311	1.0754
68	28.216	3.3399
68	37.993	3.6374
68	2.9241	1.073
68	25.452	3.2368
68	8.4627	2.1357
68	7.723	2.0442
68	6.9304	1.9359
68	3.4107	1.2269
69	0.76175	-0.27214
69	3.8642	1.3517
69	9.829	2.2853
69	2.0153	0.70078
69	8.633	2.1556
69	0.085482	-2.4594
69	44.439	3.7941
69	44.909	3.8046
69	17.053	2.8363
69	1.8163	0.5968
69	2.3681	0.86209
69	1.0223	0.022008
69	9.0372	2.2014
69	13.187	2.5792
69	2.3697	0.86276
69	39.513	3.6766
69	11.477	2.4403
69	24.851	3.2129
69	15.193	2.7208
69	12.175	2.4994
70	20.024	2.9969
70	15.548	2.7439
70	80.485	4.3881
70	21.702	3.0774
70	3.6431	1.2928
70	3.5557	1.2685
70	33.778	3.5198
70	3.5512	1.2673
70	0.88839	-0.11835
70	12.351	2.5137
70	178.51	5.1846
70	7.9672	2.0753
70	2.4816	0.90889
70	3.1291	1.1408
70	0.87919	-0.12875
70	6.217	1.8273
70	4.0844	1.4072
70	0.71589	-0.33422
70	3.6121	1.2843
70	4.5754	1.5207
71	1.0792	0.076215
71	9.9586	2.2984
71	0.59248	-0.52344
71	8.3248	2.1192
71	10.285	2.3307
71	3.1047	1.1329
71	3.8547	1.3493
71	9.1473	2.2135
71	20.115	3.0015
71	44.549	3.7966
71	11.27	2.4221
71	16.788	2.8207
71	15.236	2.7236
72	15.672	2.7519
72	10.574	2.3584
72	4.7773	1.5639
72	5.2264	1.6537
72	20.579	3.0243
72	1.7961	0.58562
72	2.3784	0.86644
72	10.279	2.3301
72	4.8917	1.5875
72	7.132	1.9646
72	9.4605	2.2471
72	1.0535	0.052095
72	29.118	3.3714
72	11.443	2.4373
72	9.1891	2.218
72	0.98355	-0.016586
72	39.077	3.6655
72	25.342	3.2325
72	20.121	3.0018
72	6.1154	1.8108
72	3.2743	1.1861
72	9.8991	2.2924
72	11.622	2.4529
72	22.037	3.0927
72	19.513	2.9711
73	1.465	0.38184
73	1.5215	0.41967
73	21.212	3.0546
73	0.4754	-0.7436
73	0.53833	-0.61928
73	3.812	1.3382
73	9.6005	2.2618
73	19.619	2.9765
73	41.766	3.7321
73	10.841	2.3834
73	3.4974	1.252
73	2.6059	0.95778
73	0.24069	-1.4242
73	15.118	2.7159
73	18.238	2.9035
73	6.8996	1.9315
73	67.575	4.2132
73	10.967	2.3949
73	2.274	0.82154
73	1.5028	0.40733
73	6.2086	1.8259
73	7.4225	2.0045
74	16.108	2.7793
74	1.9769	0.68153
74	0.53638	-0.62291
74	11.093	2.4063
74	0.3883	-0.94599
74	54.342	3.9953
74	21.032	3.046
74	33.196	3.5024
74	1.0661	0.064
74	22.332	3.106
74	101.45	4.6195
74	2.5735	0.94528
74	1.3247	0.28121
74	4.0591	1.401
74	0.62921	-0.46328
75	4.9667	1.6028
75	60.425	4.1014
75	27.009	3.2962
75	15.528	2.7427
75	17.652	2.8708
75	2.817	1.0357
75	8.8058	2.1754
75	11.795	2.4677
75	16.816	2.8223
75	0.74549	-0.29371
75	2.5527	0.93715
75	5.105	1.6302
75	2.5967	0.95426
75	1.5894	0.46335
75	60.859	4.1086
75	2.6496	0.97441
75	0.87595	-0.13245
75	60.124	4.0964
75	26.398	3.2733
75	2.625	0.96508
75	2.5319	0.92898
75	4.6157	1.5295
75	3.1398	1.1441
75	22.967	3.134
75	62.618	4.1371
75	0.82003	-0.19841
75	6.7174	1.9047
76	8.6122	2.1532
76	95.804	4.5623
76	5.7693	1.7526
76	7.4117	2.0031
76	3.2349	1.174
76	18.497	2.9176
76	23.87	3.1726
76	6.8428	1.9232
76	28.614	3.3539
76	2.5066	0.91894
76	0.82352	-0.19417
76	10.356	2.3376
76	1.4477	0.37
76	7.3378	1.993
76	21.157	3.052
76	1.11	0.10437
76	0.58696	-0.53281
76	1.1327	0.12458
76	8.9314	2.1896
76	12.116	2.4945
76	9.1387	2.2125
76	6.8403	1.9228
77	3.9238	1.3671
77	1.4693	0.38482
77	9.4496	2.246
77	3.624	1.2876
77	7.2548	1.9817
77	16.646	2.8122
77	12.708	2.5422
77	0.93954	-0.062366
77	4.6469	1.5362
77	16.101	2.7789
77	5.0587	1.6211
77	3.8167	1.3394
77	22.73	3.1237
77	5.98	1.7884
77	4.8795	1.585
77	2.18	0.77933
77	10.523	2.3536
77	5.6543	1.7324
77	0.97983	-0.020379
77	0.95328	-0.047845
77	9.2915	2.2291
77	0.89166	-0.11467
77	22.957	3.1336
77	10.334	2.3355
77	0.39529	-0.92814
78	2.0016	0.69396
78	3.7719	1.3276
78	4.4953	1.503
78	2.9403	1.0785
78	7.4547	2.0089
78	1.482	0.3934
78	52.074	3.9527
78	10.809	2.3804
78	8.2052	2.1048
78	16.99	2.8326
78	1.4279	0.35622
78	6.7164	1.9046
78	0.59175	-0.52467
78	10.528	2.3541
78	0.86376	-0.14646
78	6.3096	1.8421
78	46.66	3.8429
78	4.7697	1.5623
78	29.772	3.3936
78	2.6611	0.97874
78	7.4199	2.0042
78	6.4802	1.8688
78	5.4605	1.6975
78	2.7971	1.0286
78	1.5927	0.46544
78	21.763	3.0802
79	0.47704	-0.74016
79	12.949	2.561
79	1.5959	0.46742
79	8.8492	2.1803
79	1.4698	0.3851
79	7.5682	2.024
79	4.0529	1.3994
79	16.238	2.7873
79	0.44643	-0.80646
79	1.6987	0.52988
79	25.836	3.2518
79	6.8362	1.9222
79	5.4695	1.6992
79	16.005	2.7729
79	4.5375	1.5124
79	12.757	2.5461
79	34.603	3.5439
79	3.9643	1.3773
79	18.724	2.9298
79	3.7743	1.3282
79	29.577	3.387
79	3.5752	1.274
79	26.598	3.2808
79	4.1232	1.4166
79	2.6774	0.98484
79	5.1904	1.6468
79	1.5418	0.43295
79	16.399	2.7972
79	0.81456	-0.20511
79	1.2301	0.20706
80	180.27	5.1945
80	6.2571	1.8337
80	93.585	4.5389
80	32.33	3.476
80	23.815	3.1703
80	7.8217	2.0569
80	12.093	2.4927
80	81.62	4.4021
80	1.4896	0.39853
80	3.7532	1.3226
80	0.97892	-0.021301
80	2.0046	0.69544
80	68.046	4.2202
80	7.9036	2.0673
80	15.652	2.7506
80	3.084	1.1262
80	2.1793	0.77899
80	0.52022	-0.6535
80	3.242	1.1762
80	1.152	0.14148
80	10.55	2.3561
80	2.5453	0.93425
80	0.76512	-0.26772
80	26.08	3.2612
80	2.5725	0.94487
81	1.6735	0.51492
81	14.575	2.6793
81	0.73247	-0.31134
81	45.848	3.8253
81	3.2714	1.1852
81	4.74	1.556
81	67.195	4.2076
81	4.4639	1.496
81	9.7126	2.2734
81	64.319	4.1639
81	1.1031	0.098138
81	11.55	2.4467
81	11.483	2.4409
81	21.95	3.0888
81	3.6329	1.29
81	0.76405	-0.26912
81	15.846	2.7629
81	6.0295	1.7967
81	8.9196	2.1883
81	0.13923	-1.9717
81	8.0803	2.0894
81	3.3098	1.1969
81	4.0058	1.3877
81	2.3434	0.85161
81	15.416	2.7354
81	2.1516	0.76621
81	11.208	2.4166
82	0.47736	-0.73949
82	4.0772	1.4054
82	7.4035	2.002
82	0.56393	-0.57282
82	13.18	2.5787
82	0.31088	-1.1683
82	6.1785	1.8211
82	24.504	3.1988
82	8.3001	2.1163
82	20.16	3.0037
82	12.134	2.496
82	13.208	2.5809
82	1.3236	0.28033
82	0.61379	-0.48811
82	14.067	2.6438
82	16.671	2.8137
82	8.5192	2.1423
82	11.493	2.4417
82	31.377	3.4461
82	6.5061	1.8727
82	1.4051	0.34008
82	68.919	4.2329
82	13.509	2.6034
82	3.8991	1.3608
82	0.61794	-0.48137
82	2.4775	0.90725
82	54.526	3.9987
83	14.61	2.6817
83	8.6186	2.1539
83	16.314	2.792
83	5.295	1.6668
83	7.2852	1.9858
83	2.6899	0.98949
83	4.0103	1.3889
83	15.612	2.7481
83	1.2919	0.25609
83	9.8028	2.2827
83	26.767	3.2872
83	4.1253	1.4171
83	4.1266	1.4174
83	1.1468	0.13699
83	3.1941	1.1613
83	0.86101	-0.14965
83	5.1275	1.6346
83	3.1348	1.1426
83	11.991	2.4841
83	4.2626	1.4499
83	12.116	2.4946
83	9.1046	2.2088
83	2.7846	1.0241
83	3.6083	1.2832
83	9.4151	2.2423
84	5.5712	1.7176
84	21.445	3.0655
84	1.3136	0.27278
84	6.2521	1.8329
84	7.3233	1.9911
84	16.058	2.7762
84	1.3702	0.31495
84	3.5736	1.2736
84	30.577	3.4202
84	11.299	2.4247
84	21.452	3.0658
84	10.994	2.3974
84	0.56245	-0.57546
84	4.9995	1.6093
84	3.4431	1.2364
84	16.725	2.8169
84	1.083	0.079772
84	6.8521	1.9246
84	2.8447	1.0454
84	1.5861	0.46126
84	109.76	4.6983
84	1.1736	0.1601
84	3.5234	1.2594
84	3.3422	1.2066
84	10.87	2.386
84	12.671	2.5393
85	7.1446	1.9664
85	18.279	2.9057
85	6.9318	1.9361
85	4.8284	1.5745
85	1.6729	0.51454
85	27.324	3.3078
85	6.4577	1.8653
85	3.9836	1.3822
85	1.2476	0.22122
85	4.6745	1.5421
85	1.0543	0.052883
85	3.2483	1.1781
85	16.2	2.785
85	12.176	2.4995
85	14.87	2.6994
85	13.886	2.6309
86	1.162	0.15015
86	10.213	2.3237
86	65.052	4.1752
86	3.0324	1.1093
86	2.0986	0.74128
86	1.2711	0.23992
86	1.8061	0.59116
86	5.6782	1.7366
86	1.7905	0.58248
86	12.143	2.4967
86	2.5834	0.9491
86	4.0265	1.3929
86	1.5899	0.4637
86	10.051	2.3077
86	3.3746	1.2163
86	8.7344	2.1673
87	4.9842	1.6063
87	46.776	3.8454
87	22.151	3.0979
87	1.3565	0.30491
87	7.4875	2.0132
87	7.8578	2.0615
87	15.765	2.7578
87	3.3502	1.209
87	4.5278	1.5102
87	1.9792	0.68269
87	2.0526	0.71913
87	31.485	3.4495
87	6.1211	1.8117
87	6.584	1.8846
87	3.4088	1.2264
87	1.7288	0.54742
87	0.035255	-3.3452
87	29.359	3.3796
87	2.1963	0.78679
87	6.3039	1.8412
87	1.4009	0.33715
87	0.20077	-1.6056
87	1.5644	0.44749
88	2.1831	0.78073
88	8.1186	2.0942
88	0.26129	-1.3421
88	2.6888	0.98911
88	20.294	3.0103
88	3.7162	1.3127
88	4.9462	1.5986
88	25.956	3.2564
88	8.4385	2.1328
88	1.7349	0.55093
88	1.5398	0.43162
88	14.706	2.6883
88	5.0927	1.6278
88	8.906	2.1867
88	1.951	0.66833
89	13.085	2.5715
89	2.9032	1.0658
89	0.73071	-0.31374
89	13.143	2.5759
89	34.623	3.5445
89	18.801	2.9339
89	0.5858	-0.53478
89	3.0325	1.1094
89	3.8594	1.3505
89	4.4551	1.494
89	6.0889	1.8065
89	24.075	3.1812
89	5.6661	1.7345
89	25.574	3.2416
89	2.2569	0.81399
90	4.4789	1.4994
90	5.8732	1.7704
90	2.0604	0.72292
90	9.679	2.27
90	1.7328	0.54972
90	6.9227	1.9348
90	8.4849	2.1383
90	1.5589	0.444
90	5.5446	1.7128
90	10.751	2.375
90	2.2102	0.7931
90	27.04	3.2973
90	4.8025	1.5691
90	0.66613	-0.40628
90	41.837	3.7338
90	1.1667	0.15422
91	4.4233	1.4869
91	0.28978	-1.2386
91	1.7013	0.53142
91	3.9495	1.3736
91	3.702	1.3089
91	21.02	3.0455
91	15.612	2.748
91	13.08	2.5711
91	1.6146	0.47907
91	4.8615	1.5814
91	3.3899	1.2208
91	3.8614	1.351
91	0.85171	-0.16051
91	14.081	2.6448
92	32.22	3.4726
92	42.302	3.7448
92	0.23029	-1.4684
92	11.162	2.4125
92	1.2611	0.232
92	4.0113	1.3891
92	3.2193	1.1692
92	26.689	3.2842
92	7.0848	1.958
92	2.543	0.93335
92	3.7508	1.322
92	6.7283	1.9063
92	5.3185	1.6712
93	4.8885	1.5869
93	8.9682	2.1937
93	7.1758	1.9707
93	18.154	2.8989
93	14.021	2.6405
93	1.6006	0.47036
93	7.6409	2.0335
93	2.1358	0.75886
94	10.555	2.3566
94	12.013	2.486
94	0.27722	-1.283
94	12.086	2.492
94	8.0592	2.0868
94	1.9292	0.65711
94	2.3382	0.8494
94	3.7724	1.3277
94	2.7945	1.0276
94	4.3371	1.4672
94	9.1594	2.2148
94	5.0582	1.621
94	3.9351	1.3699
94	15.555	2.7444
95	3.2589	1.1814
95	1.7263	0.54601
96	3.8822	1.3564
96	2.5103	0.92039
96	3.3932	1.2218
96	1.3978	0.3349
96	38.895	3.6609
96	32.261	3.4739
96	1.7611	0.56592
97	15.441	2.737
97	2.7318	1.005
98	0.29478	-1.2215
99	19.525	2.9717
102	3.25	1.1786
103	0.55841	-0.58266
