# Supplementary material for: Quantifying the Potential for Future Gene Therapy to Lower Lifetime Risk of Polygenic Late-Onset Diseases
Source: MDPI journal article supplement (doi:10.3390/ijms20133352), 2019-07-08
Supplement: s2 [file s2 › SuppFiles/Results/LODsCommonLow/ColorectalCancer/DensityPostAnalysis.csv]

age	A..1..	A..2..	A..3..	A..4..	A..5..	A..6..	A..7..	A..8..	A..9..	A..10..	A..11..	A..12..	A..13..	A..14..	A..15..	A..16..	A..17..	A..18..	A..19..	A..20..
1	0.0000000e+00	0.0000000e+00	0.0000000e+00	0.0000000e+00	0.0000000e+00	0.0000000e+00	0.0000000e+00	0.0000000e+00	0.0000000e+00	0.0000000e+00	0.0000000e+00	0.0000000e+00	0.0000000e+00	0.0000000e+00	0.0000000e+00	0.0000000e+00	0.0000000e+00	0.0000000e+00	0.0000000e+00	0.0000000e+00
2	0.0000000e+00	0.0000000e+00	0.0000000e+00	0.0000000e+00	0.0000000e+00	0.0000000e+00	0.0000000e+00	0.0000000e+00	0.0000000e+00	0.0000000e+00	0.0000000e+00	0.0000000e+00	0.0000000e+00	0.0000000e+00	0.0000000e+00	0.0000000e+00	0.0000000e+00	0.0000000e+00	0.0000000e+00	0.0000000e+00
3	0.0000000e+00	0.0000000e+00	0.0000000e+00	0.0000000e+00	0.0000000e+00	0.0000000e+00	0.0000000e+00	0.0000000e+00	0.0000000e+00	0.0000000e+00	0.0000000e+00	0.0000000e+00	0.0000000e+00	0.0000000e+00	0.0000000e+00	0.0000000e+00	0.0000000e+00	0.0000000e+00	0.0000000e+00	0.0000000e+00
4	0.0000000e+00	0.0000000e+00	0.0000000e+00	0.0000000e+00	0.0000000e+00	0.0000000e+00	0.0000000e+00	0.0000000e+00	0.0000000e+00	0.0000000e+00	0.0000000e+00	0.0000000e+00	0.0000000e+00	0.0000000e+00	0.0000000e+00	0.0000000e+00	0.0000000e+00	0.0000000e+00	0.0000000e+00	0.0000000e+00
5	0.0000000e+00	0.0000000e+00	0.0000000e+00	0.0000000e+00	0.0000000e+00	0.0000000e+00	0.0000000e+00	0.0000000e+00	0.0000000e+00	0.0000000e+00	0.0000000e+00	0.0000000e+00	0.0000000e+00	0.0000000e+00	0.0000000e+00	0.0000000e+00	0.0000000e+00	0.0000000e+00	0.0000000e+00	0.0000000e+00
6	0.0000000e+00	0.0000000e+00	0.0000000e+00	0.0000000e+00	0.0000000e+00	0.0000000e+00	0.0000000e+00	0.0000000e+00	0.0000000e+00	0.0000000e+00	0.0000000e+00	0.0000000e+00	0.0000000e+00	0.0000000e+00	0.0000000e+00	0.0000000e+00	0.0000000e+00	0.0000000e+00	0.0000000e+00	0.0000000e+00
7	0.0000000e+00	0.0000000e+00	0.0000000e+00	0.0000000e+00	0.0000000e+00	0.0000000e+00	0.0000000e+00	0.0000000e+00	0.0000000e+00	0.0000000e+00	0.0000000e+00	0.0000000e+00	0.0000000e+00	0.0000000e+00	0.0000000e+00	0.0000000e+00	0.0000000e+00	0.0000000e+00	0.0000000e+00	0.0000000e+00
8	0.0000000e+00	0.0000000e+00	0.0000000e+00	0.0000000e+00	0.0000000e+00	0.0000000e+00	0.0000000e+00	0.0000000e+00	0.0000000e+00	0.0000000e+00	0.0000000e+00	0.0000000e+00	0.0000000e+00	0.0000000e+00	0.0000000e+00	0.0000000e+00	0.0000000e+00	0.0000000e+00	0.0000000e+00	0.0000000e+00
9	0.0000000e+00	0.0000000e+00	0.0000000e+00	0.0000000e+00	0.0000000e+00	0.0000000e+00	0.0000000e+00	0.0000000e+00	0.0000000e+00	0.0000000e+00	0.0000000e+00	0.0000000e+00	0.0000000e+00	0.0000000e+00	0.0000000e+00	0.0000000e+00	0.0000000e+00	0.0000000e+00	0.0000000e+00	0.0000000e+00
10	0.0000000e+00	0.0000000e+00	0.0000000e+00	0.0000000e+00	0.0000000e+00	0.0000000e+00	0.0000000e+00	0.0000000e+00	0.0000000e+00	0.0000000e+00	0.0000000e+00	0.0000000e+00	0.0000000e+00	0.0000000e+00	0.0000000e+00	0.0000000e+00	0.0000000e+00	0.0000000e+00	0.0000000e+00	0.0000000e+00
11	0.0000000e+00	0.0000000e+00	0.0000000e+00	0.0000000e+00	0.0000000e+00	0.0000000e+00	0.0000000e+00	0.0000000e+00	0.0000000e+00	0.0000000e+00	0.0000000e+00	0.0000000e+00	0.0000000e+00	0.0000000e+00	0.0000000e+00	0.0000000e+00	0.0000000e+00	0.0000000e+00	0.0000000e+00	0.0000000e+00
12	0.0000000e+00	0.0000000e+00	0.0000000e+00	0.0000000e+00	0.0000000e+00	0.0000000e+00	0.0000000e+00	0.0000000e+00	0.0000000e+00	0.0000000e+00	0.0000000e+00	0.0000000e+00	0.0000000e+00	0.0000000e+00	0.0000000e+00	0.0000000e+00	0.0000000e+00	0.0000000e+00	0.0000000e+00	0.0000000e+00
13	0.0000000e+00	0.0000000e+00	0.0000000e+00	0.0000000e+00	0.0000000e+00	0.0000000e+00	0.0000000e+00	0.0000000e+00	0.0000000e+00	0.0000000e+00	0.0000000e+00	0.0000000e+00	0.0000000e+00	0.0000000e+00	0.0000000e+00	0.0000000e+00	0.0000000e+00	0.0000000e+00	0.0000000e+00	0.0000000e+00
14	0.0000000e+00	0.0000000e+00	0.0000000e+00	0.0000000e+00	0.0000000e+00	0.0000000e+00	0.0000000e+00	0.0000000e+00	0.0000000e+00	0.0000000e+00	0.0000000e+00	0.0000000e+00	0.0000000e+00	0.0000000e+00	0.0000000e+00	0.0000000e+00	0.0000000e+00	0.0000000e+00	0.0000000e+00	0.0000000e+00
15	0.0000000e+00	0.0000000e+00	0.0000000e+00	0.0000000e+00	0.0000000e+00	0.0000000e+00	0.0000000e+00	0.0000000e+00	0.0000000e+00	0.0000000e+00	0.0000000e+00	0.0000000e+00	0.0000000e+00	0.0000000e+00	0.0000000e+00	0.0000000e+00	0.0000000e+00	0.0000000e+00	0.0000000e+00	0.0000000e+00
16	0.0000000e+00	0.0000000e+00	0.0000000e+00	0.0000000e+00	0.0000000e+00	0.0000000e+00	0.0000000e+00	0.0000000e+00	0.0000000e+00	0.0000000e+00	0.0000000e+00	0.0000000e+00	0.0000000e+00	0.0000000e+00	0.0000000e+00	0.0000000e+00	0.0000000e+00	0.0000000e+00	0.0000000e+00	0.0000000e+00
17	0.0000000e+00	0.0000000e+00	0.0000000e+00	0.0000000e+00	0.0000000e+00	0.0000000e+00	0.0000000e+00	0.0000000e+00	0.0000000e+00	0.0000000e+00	0.0000000e+00	0.0000000e+00	0.0000000e+00	0.0000000e+00	0.0000000e+00	0.0000000e+00	0.0000000e+00	0.0000000e+00	0.0000000e+00	0.0000000e+00
18	0.0000000e+00	0.0000000e+00	0.0000000e+00	0.0000000e+00	0.0000000e+00	0.0000000e+00	0.0000000e+00	0.0000000e+00	0.0000000e+00	0.0000000e+00	0.0000000e+00	0.0000000e+00	0.0000000e+00	0.0000000e+00	0.0000000e+00	0.0000000e+00	0.0000000e+00	0.0000000e+00	0.0000000e+00	0.0000000e+00
19	0.0000000e+00	0.0000000e+00	0.0000000e+00	0.0000000e+00	0.0000000e+00	0.0000000e+00	0.0000000e+00	0.0000000e+00	0.0000000e+00	0.0000000e+00	0.0000000e+00	0.0000000e+00	0.0000000e+00	0.0000000e+00	0.0000000e+00	0.0000000e+00	0.0000000e+00	0.0000000e+00	0.0000000e+00	0.0000000e+00
20	0.0000000e+00	0.0000000e+00	0.0000000e+00	0.0000000e+00	0.0000000e+00	0.0000000e+00	0.0000000e+00	0.0000000e+00	0.0000000e+00	0.0000000e+00	0.0000000e+00	0.0000000e+00	0.0000000e+00	0.0000000e+00	0.0000000e+00	0.0000000e+00	0.0000000e+00	0.0000000e+00	0.0000000e+00	0.0000000e+00
21	0.0000000e+00	0.0000000e+00	0.0000000e+00	0.0000000e+00	0.0000000e+00	0.0000000e+00	0.0000000e+00	0.0000000e+00	0.0000000e+00	0.0000000e+00	0.0000000e+00	0.0000000e+00	0.0000000e+00	0.0000000e+00	0.0000000e+00	0.0000000e+00	0.0000000e+00	0.0000000e+00	0.0000000e+00	0.0000000e+00
22	0.0000000e+00	0.0000000e+00	0.0000000e+00	0.0000000e+00	0.0000000e+00	0.0000000e+00	0.0000000e+00	0.0000000e+00	0.0000000e+00	0.0000000e+00	0.0000000e+00	0.0000000e+00	0.0000000e+00	0.0000000e+00	0.0000000e+00	0.0000000e+00	0.0000000e+00	0.0000000e+00	0.0000000e+00	0.0000000e+00
23	0.0000000e+00	0.0000000e+00	0.0000000e+00	0.0000000e+00	0.0000000e+00	0.0000000e+00	0.0000000e+00	0.0000000e+00	0.0000000e+00	0.0000000e+00	0.0000000e+00	0.0000000e+00	0.0000000e+00	0.0000000e+00	0.0000000e+00	0.0000000e+00	0.0000000e+00	0.0000000e+00	0.0000000e+00	0.0000000e+00
24	9.1071380e-06	9.1386804e-06	9.1524226e-06	9.1569418e-06	2.2770838e-06	2.2849704e-06	2.2884064e-06	2.2895364e-06	5.6927488e-07	5.7124655e-07	5.7210556e-07	5.7238805e-07	1.4231874e-07	1.4281165e-07	1.4302640e-07	1.4309703e-07	3.5579681e-08	3.5702911e-08	3.5756599e-08	3.5774254e-08
25	1.9283663e-05	1.9357548e-05	1.9393611e-05	1.9404362e-05	4.8222590e-06	4.8407354e-06	4.8497536e-06	4.8524420e-06	1.2055824e-06	1.2102016e-06	1.2124562e-06	1.2131283e-06	3.0139568e-07	3.0255047e-07	3.0311411e-07	3.0328214e-07	7.5348907e-08	7.5637605e-08	7.5778517e-08	7.5820523e-08
26	3.0998491e-05	3.1126647e-05	3.1196622e-05	3.1218322e-05	7.7530974e-06	7.7851507e-06	7.8026522e-06	7.8080797e-06	1.9383201e-06	1.9463336e-06	1.9507091e-06	1.9520660e-06	4.8458020e-07	4.8658358e-07	4.8767745e-07	4.8801668e-07	1.2114502e-07	1.2164586e-07	1.2191933e-07	1.2200414e-07
27	4.4049501e-05	4.4242072e-05	4.4359269e-05	4.4399080e-05	1.1019399e-05	1.1067573e-05	1.1096891e-05	1.1106850e-05	2.7549423e-06	2.7669861e-06	2.7743158e-06	2.7768057e-06	6.8873594e-07	6.9174688e-07	6.9357932e-07	6.9420179e-07	1.7218392e-07	1.7293666e-07	1.7339477e-07	1.7355039e-07
28	5.8770518e-05	5.9038744e-05	5.9219155e-05	5.9288750e-05	1.4705148e-05	1.4772261e-05	1.4817402e-05	1.4834816e-05	3.6764518e-06	3.6932309e-06	3.7045167e-06	3.7088703e-06	9.1911358e-07	9.2330838e-07	9.2612982e-07	9.2721823e-07	2.2977828e-07	2.3082698e-07	2.3153234e-07	2.3180445e-07
29	7.5538515e-05	7.5893216e-05	7.6156071e-05	7.6270589e-05	1.8905334e-05	1.8994107e-05	1.9059893e-05	1.9088554e-05	4.7266064e-06	4.7488007e-06	4.7652481e-06	4.7724138e-06	1.1816527e-06	1.1872013e-06	1.1913131e-06	1.1931045e-06	2.9541298e-07	2.9680013e-07	2.9782809e-07	2.9827595e-07
30	9.4242964e-05	9.4696980e-05	9.5059809e-05	9.5236904e-05	2.3593012e-05	2.3706671e-05	2.3797503e-05	2.3841837e-05	5.8986781e-06	5.9270951e-06	5.9498046e-06	5.9608890e-06	1.4746712e-06	1.4817754e-06	1.4874528e-06	1.4902239e-06	3.6866751e-07	3.7044357e-07	3.7186292e-07	3.7255569e-07
31	1.1532221e-04	1.1589364e-04	1.1637278e-04	1.1663439e-04	2.8878939e-05	2.9022037e-05	2.9142022e-05	2.9207535e-05	7.2203726e-06	7.2561503e-06	7.2861492e-06	7.3025289e-06	1.8050956e-06	1.8140401e-06	1.8215398e-06	1.8256347e-06	4.5127348e-07	4.5350959e-07	4.5538452e-07	4.5640825e-07
32	1.3921292e-04	1.3992409e-04	1.4053580e-04	1.4090808e-04	3.4873844e-05	3.5051997e-05	3.5205233e-05	3.5298492e-05	8.7193921e-06	8.7639351e-06	8.8022483e-06	8.8255655e-06	2.1798517e-06	2.1909874e-06	2.2005657e-06	2.2063951e-06	5.4496229e-07	5.4774623e-07	5.5014080e-07	5.5159813e-07
33	1.6584678e-04	1.6671953e-04	1.6748043e-04	1.6799222e-04	4.1562063e-05	4.1780779e-05	4.1971464e-05	4.2099721e-05	1.0391840e-05	1.0446526e-05	1.0494203e-05	1.0526271e-05	2.5979651e-06	2.6116366e-06	2.6235560e-06	2.6315731e-06	6.4949039e-07	6.5290826e-07	6.5588810e-07	6.5789236e-07
34	1.9605680e-04	1.9712382e-04	1.9804944e-04	1.9873538e-04	4.9154689e-05	4.9422209e-05	4.9654277e-05	4.9826254e-05	1.2290526e-05	1.2357416e-05	1.2415442e-05	1.2458443e-05	3.0726389e-06	3.0893614e-06	3.1038679e-06	3.1146181e-06	7.6815847e-07	7.7233910e-07	7.7596571e-07	7.7865326e-07
35	2.3026534e-04	2.3156487e-04	2.3268043e-04	2.3357194e-04	5.7760459e-05	5.8086437e-05	5.8366269e-05	5.8589898e-05	1.4442678e-05	1.4524187e-05	1.4594157e-05	1.4650075e-05	3.6106795e-06	3.6310568e-06	3.6485495e-06	3.6625288e-06	9.0266816e-07	9.0776247e-07	9.1213563e-07	9.1563045e-07
36	2.6897131e-04	2.7054636e-04	2.7188695e-04	2.7301100e-04	6.7508184e-05	6.7903501e-05	6.8239971e-05	6.8522093e-05	1.6880552e-05	1.6979402e-05	1.7063537e-05	1.7134082e-05	4.2201517e-06	4.2448643e-06	4.2658980e-06	4.2835344e-06	1.0550356e-06	1.0612137e-06	1.0664721e-06	1.0708812e-06
37	3.1197933e-04	3.1387912e-04	3.1548257e-04	3.1686176e-04	7.8352533e-05	7.8829659e-05	7.9232360e-05	7.9578739e-05	1.9592862e-05	1.9712173e-05	1.9812872e-05	1.9899488e-05	4.8982341e-06	4.9280618e-06	4.9532368e-06	4.9748908e-06	1.2245553e-06	1.2320123e-06	1.2383060e-06	1.2437195e-06
38	3.6075064e-04	3.6304694e-04	3.6495743e-04	3.6662308e-04	9.0666953e-05	9.1244078e-05	9.1724239e-05	9.2142865e-05	2.2673080e-05	2.2817402e-05	2.2937476e-05	2.3042161e-05	5.6682948e-06	5.7043754e-06	5.7343940e-06	5.7605655e-06	1.4170694e-06	1.4260896e-06	1.4335942e-06	1.4401370e-06
39	4.1501118e-04	4.1778069e-04	4.2005442e-04	4.2202684e-04	1.0438856e-04	1.0508518e-04	1.0565709e-04	1.0615322e-04	2.6105559e-05	2.6279770e-05	2.6422795e-05	2.6546866e-05	6.5264226e-06	6.5699756e-06	6.6057320e-06	6.6367500e-06	1.6316000e-06	1.6424882e-06	1.6514273e-06	1.6591818e-06
40	4.7665535e-04	4.7999601e-04	4.8270492e-04	4.8503036e-04	1.2000457e-04	1.2084562e-04	1.2152763e-04	1.2211309e-04	3.0012286e-05	3.0222629e-05	3.0393193e-05	3.0539613e-05	7.5031150e-06	7.5557010e-06	7.5983424e-06	7.6349475e-06	1.8757713e-06	1.8889177e-06	1.8995780e-06	1.9087293e-06
41	5.4570646e-04	5.4973179e-04	5.5295093e-04	5.5569087e-04	1.3753151e-04	1.3854599e-04	1.3935730e-04	1.4004783e-04	3.4397539e-05	3.4651268e-05	3.4854181e-05	3.5026887e-05	8.5994421e-06	8.6628748e-06	8.7136032e-06	8.7567801e-06	2.1498507e-06	2.1657088e-06	2.1783908e-06	2.1891850e-06
42	6.2298645e-04	6.2783799e-04	6.3166120e-04	6.3488804e-04	1.5719077e-04	1.5841490e-04	1.5937957e-04	1.6019376e-04	3.9316880e-05	3.9623063e-05	3.9864347e-05	4.0067994e-05	9.8292951e-06	9.9058413e-06	9.9661628e-06	1.0017075e-05	2.4573109e-06	2.4764473e-06	2.4915276e-06	2.5042556e-06
43	7.1029145e-04	7.1614979e-04	7.2070832e-04	7.2450096e-04	1.7945611e-04	1.8093623e-04	1.8208795e-04	1.8304616e-04	4.4889084e-05	4.5259320e-05	4.5547411e-05	4.5787098e-05	1.1222369e-05	1.1314929e-05	1.1386952e-05	1.1446874e-05	2.8055754e-06	2.8287152e-06	2.8467209e-06	2.8617014e-06
44	8.0749383e-04	8.1457394e-04	8.2000986e-04	8.2447268e-04	2.0431585e-04	2.0610729e-04	2.0748271e-04	2.0861191e-04	5.1111508e-05	5.1559654e-05	5.1903728e-05	5.2186209e-05	1.2778004e-05	1.2890042e-05	1.2976061e-05	1.3046682e-05	3.1944792e-06	3.2224884e-06	3.2439931e-06	3.2616482e-06
45	9.1664187e-04	9.2524027e-04	9.3172487e-04	9.3698316e-04	2.3231979e-04	2.3449903e-04	2.3614253e-04	2.3747522e-04	5.8122122e-05	5.8667327e-05	5.9078500e-05	5.9411916e-05	1.4530695e-05	1.4666998e-05	1.4769793e-05	1.4853147e-05	3.6326455e-06	3.6667209e-06	3.6924193e-06	3.7132579e-06
46	1.0384424e-03	1.0489376e-03	1.0566750e-03	1.0628627e-03	2.6368243e-04	2.6634740e-04	2.6831208e-04	2.6988327e-04	6.5975069e-05	6.6641863e-05	6.7133438e-05	6.7526561e-05	1.6493980e-05	1.6660681e-05	1.6783576e-05	1.6881858e-05	4.1234584e-06	4.1651332e-06	4.1958568e-06	4.2204271e-06
47	1.1738332e-03	1.1866789e-03	1.1959203e-03	1.2032028e-03	2.9868535e-04	3.0195399e-04	3.0430547e-04	3.0615854e-04	7.4741405e-05	7.5559332e-05	7.6147755e-05	7.6611455e-05	1.8685625e-05	1.8890110e-05	1.9037218e-05	1.9153145e-05	4.6713592e-06	4.7224799e-06	4.7592565e-06	4.7882379e-06
48	1.3254536e-03	1.3412229e-03	1.3522851e-03	1.3608928e-03	3.3806242e-04	3.4208444e-04	3.4490588e-04	3.4710132e-04	8.4605627e-05	8.5612203e-05	8.6318315e-05	8.6867760e-05	2.1151759e-05	2.1403407e-05	2.1579938e-05	2.1717301e-05	5.2878792e-06	5.3507905e-06	5.3949227e-06	5.4292632e-06
49	1.4929846e-03	1.5123885e-03	1.5256492e-03	1.5358303e-03	3.8179419e-04	3.8675626e-04	3.9014734e-04	3.9275092e-04	9.5563736e-05	9.6805751e-05	9.7654545e-05	9.8306226e-05	2.3891385e-05	2.4201894e-05	2.4414097e-05	2.4577020e-05	5.9727687e-06	6.0503951e-06	6.1034450e-06	6.1441753e-06
50	1.6790147e-03	1.7029135e-03	1.7188874e-03	1.7309343e-03	4.3063316e-04	4.3676271e-04	4.4085969e-04	4.4394948e-04	1.0780535e-04	1.0933983e-04	1.1036548e-04	1.1113898e-04	2.6951913e-05	2.7335542e-05	2.7591958e-05	2.7785338e-05	6.7378794e-06	6.8337852e-06	6.8978884e-06	6.9462326e-06
51	1.8850674e-03	1.9145061e-03	1.9338556e-03	1.9481204e-03	4.8507687e-04	4.9265222e-04	4.9763134e-04	5.0130205e-04	1.2145654e-04	1.2335331e-04	1.2460001e-04	1.2551910e-04	3.0364869e-05	3.0839071e-05	3.1150754e-05	3.1380533e-05	7.5910912e-06	7.7096398e-06	7.7875592e-06	7.8450032e-06
52	2.1130718e-03	2.1493659e-03	2.1728873e-03	2.1898088e-03	5.4575617e-04	5.5513006e-04	5.6120509e-04	5.6557550e-04	1.3667718e-04	1.3902475e-04	1.4054615e-04	1.4164066e-04	3.4170228e-05	3.4757134e-05	3.5137497e-05	3.5411132e-05	8.5423968e-06	8.6891207e-06	8.7842094e-06	8.8526170e-06
53	2.3636371e-03	2.4082826e-03	2.4369346e-03	2.4570340e-03	6.1297927e-04	6.2455753e-04	6.3198805e-04	6.3720056e-04	1.5354665e-04	1.5644692e-04	1.5830821e-04	1.5961390e-04	3.8387844e-05	3.9112933e-05	3.9578270e-05	3.9904703e-05	9.5967580e-06	9.7780263e-06	9.8943581e-06	9.9759648e-06
54	2.6391995e-03	2.6939436e-03	2.7289560e-03	2.7528836e-03	6.8757728e-04	7.0183948e-04	7.1096109e-04	7.1719481e-04	1.7227604e-04	1.7584951e-04	1.7813498e-04	1.7969687e-04	4.3070505e-05	4.3963904e-05	4.4535290e-05	4.4925776e-05	1.0767369e-05	1.0990714e-05	1.1133557e-05	1.1231176e-05
55	2.9392004e-03	3.0060318e-03	3.0488191e-03	3.0774181e-03	7.6961068e-04	7.8711005e-04	7.9831363e-04	8.0580208e-04	1.9288360e-04	1.9726938e-04	2.0007728e-04	2.0195407e-04	4.8222784e-05	4.9319271e-05	5.0021273e-05	5.0490489e-05	1.2055372e-05	1.2329487e-05	1.2504982e-05	1.2622283e-05
56	3.2667136e-03	3.3479339e-03	3.4002180e-03	3.4345831e-03	8.6017134e-04	8.8155778e-04	8.9532490e-04	9.0437373e-04	2.1564728e-04	2.2100892e-04	2.2446037e-04	2.2672894e-04	5.3914188e-05	5.5254657e-05	5.6117558e-05	5.6684724e-05	1.3478140e-05	1.3813247e-05	1.4028966e-05	1.4170753e-05
57	3.6213077e-03	3.7194510e-03	3.7833362e-03	3.8247388e-03	9.5944357e-04	9.8544605e-04	1.0023720e-03	1.0133414e-03	2.4061790e-04	2.4713903e-04	2.5138389e-04	2.5413489e-04	6.0157441e-05	6.1787806e-05	6.2849071e-05	6.3536855e-05	1.5038850e-05	1.5446428e-05	1.5711735e-05	1.5883675e-05
58	4.0049250e-03	4.1230423e-03	4.2009203e-03	4.2508998e-03	1.0683274e-03	1.0998356e-03	1.1206099e-03	1.1339421e-03	2.6802720e-04	2.7593213e-04	2.8114407e-04	2.8448892e-04	6.7010507e-05	6.8986848e-05	7.0289906e-05	7.1126164e-05	1.6751990e-05	1.7246056e-05	1.7571808e-05	1.7780865e-05
59	4.4168479e-03	4.5582829e-03	4.6528339e-03	4.7133055e-03	1.1870374e-03	1.2250483e-03	1.2504591e-03	1.2667110e-03	2.9793554e-04	3.0747594e-04	3.1385382e-04	3.1793289e-04	7.4488498e-05	7.6873745e-05	7.8468314e-05	7.9488145e-05	1.8621332e-05	1.9217618e-05	1.9616243e-05	1.9871190e-05
60	4.8576307e-03	5.0258586e-03	5.1401363e-03	5.2133001e-03	1.3162071e-03	1.3617896e-03	1.3927539e-03	1.4125781e-03	3.3050996e-04	3.4195607e-04	3.4973145e-04	3.5470947e-04	8.2633212e-05	8.5494938e-05	8.7438918e-05	8.8683508e-05	2.0657320e-05	2.1372717e-05	2.1858689e-05	2.2169822e-05
61	5.3235141e-03	5.5222975e-03	5.6595984e-03	5.7479832e-03	1.4552686e-03	1.5096092e-03	1.5471426e-03	1.5713040e-03	3.6561567e-04	3.7926799e-04	3.8869774e-04	3.9476795e-04	9.1410979e-05	9.4824323e-05	9.7181940e-05	9.8699612e-05	2.2851531e-05	2.3704822e-05	2.4294195e-05	2.4673593e-05
62	5.8163610e-03	6.0499571e-03	6.2139208e-03	6.3206509e-03	1.6053672e-03	1.6698418e-03	1.7150972e-03	1.7445556e-03	4.0355146e-04	4.1975885e-04	4.3113500e-04	4.3854016e-04	1.0089654e-04	1.0494874e-04	1.0779302e-04	1.0964447e-04	2.5222644e-05	2.6235633e-05	2.6946662e-05	2.7409497e-05
63	6.3328111e-03	6.6060108e-03	6.8008420e-03	6.9292996e-03	1.7661689e-03	1.8423620e-03	1.8966988e-03	1.9325246e-03	4.4424432e-04	4.6340918e-04	4.7707651e-04	4.8608777e-04	1.1107170e-04	1.1586337e-04	1.1928053e-04	1.2153356e-04	2.7766100e-05	2.8963939e-05	2.9818173e-05	3.0381394e-05
64	6.8652367e-03	7.1830009e-03	7.4130127e-03	7.5667786e-03	1.9359920e-03	2.0256013e-03	2.0904645e-03	2.1338264e-03	4.8728067e-04	5.0983493e-04	5.2616071e-04	5.3707470e-04	1.2183308e-04	1.2747224e-04	1.3155412e-04	1.3428291e-04	3.0456050e-05	3.1865739e-05	3.2886133e-05	3.3568280e-05
65	7.4177450e-03	7.7862246e-03	8.0558746e-03	8.2390486e-03	2.1168687e-03	2.2220250e-03	2.2989775e-03	2.3512515e-03	5.3318848e-04	5.5967484e-04	5.7905731e-04	5.9222389e-04	1.3331275e-04	1.3993512e-04	1.4478130e-04	1.4807333e-04	3.3325501e-05	3.4980959e-05	3.6192408e-05	3.7015349e-05
66	7.9795923e-03	8.4051510e-03	8.7190047e-03	8.9357853e-03	2.3061211e-03	2.4291085e-03	2.5198130e-03	2.5824631e-03	5.8130337e-04	6.1230479e-04	6.3516864e-04	6.5096084e-04	1.4534464e-04	1.5309600e-04	1.5881270e-04	1.6276126e-04	3.6332929e-05	3.8270596e-05	3.9699645e-05	4.0686697e-05
67	8.5470790e-03	9.0371774e-03	9.4001276e-03	9.6548863e-03	2.5032830e-03	2.6468239e-03	2.7531253e-03	2.8277395e-03	6.3152196e-04	6.6773408e-04	6.9455155e-04	7.1337502e-04	1.5790297e-04	1.6695729e-04	1.7366261e-04	1.7836915e-04	3.9471878e-05	4.1735237e-05	4.3411403e-05	4.4587922e-05
68	9.1131824e-03	9.6758315e-03	1.0093250e-02	1.0390931e-02	2.7067192e-03	2.8738324e-03	2.9978106e-03	3.0862250e-03	6.8344394e-04	7.2563986e-04	7.5694422e-04	7.7926878e-04	1.7088768e-04	1.8143830e-04	1.8926562e-04	1.9484763e-04	4.2717331e-05	4.5354705e-05	4.7311323e-05	4.8706676e-05
69	9.6680624e-03	1.0312552e-02	1.0789879e-02	1.1135389e-02	2.9136552e-03	3.1078845e-03	3.2517360e-03	3.3558621e-03	7.3637740e-04	7.8546558e-04	8.2182163e-04	8.4813774e-04	1.8412580e-04	1.9639994e-04	2.0549051e-04	2.1207066e-04	4.6026044e-05	4.9094219e-05	5.1366594e-05	5.3011439e-05
70	1.0204954e-02	1.0941891e-02	1.1485434e-02	1.1883193e-02	3.1221967e-03	3.3476619e-03	3.5139584e-03	3.6356526e-03	7.8985267e-04	8.4689080e-04	8.8896045e-04	9.1974664e-04	1.9749995e-04	2.1176214e-04	2.2228151e-04	2.2997949e-04	4.9368665e-05	5.2933756e-05	5.5563262e-05	5.7487511e-05
71	1.0715704e-02	1.1557145e-02	1.2173498e-02	1.2628064e-02	3.3297639e-03	3.5912307e-03	3.7827541e-03	3.9240046e-03	8.4322302e-04	9.0943636e-04	9.5793740e-04	9.9370739e-04	2.1084843e-04	2.2740511e-04	2.3953283e-04	2.4847713e-04	5.2704772e-05	5.6843367e-05	5.9874874e-05	6.2110640e-05
72	1.1190911e-02	1.2150393e-02	1.2847109e-02	1.3363073e-02	3.5331022e-03	3.8360218e-03	4.0559833e-03	4.2188793e-03	8.9566624e-04	9.7245850e-04	1.0282203e-03	1.0695156e-03	2.2396565e-04	2.4316793e-04	2.5711143e-04	2.6743751e-04	5.5982974e-05	6.0782820e-05	6.4268170e-05	6.6849301e-05
73	1.1622951e-02	1.2715235e-02	1.3500276e-02	1.4082682e-02	3.7293376e-03	4.0798076e-03	4.3316954e-03	4.5185663e-03	9.4645345e-04	1.0353978e-03	1.0993234e-03	1.1467486e-03	2.3666936e-04	2.5891071e-04	2.7489590e-04	2.8675500e-04	5.9157715e-05	6.4717148e-05	6.8712793e-05	7.1677088e-05
74	1.2000746e-02	1.3240045e-02	1.4122649e-02	1.4776330e-02	3.9137708e-03	4.3179399e-03	4.6057812e-03	4.8189644e-03	9.9437942e-04	1.0970675e-03	1.1701999e-03	1.2243637e-03	2.4865814e-04	2.7433668e-04	2.9262444e-04	3.0616885e-04	6.2153657e-05	6.8572170e-05	7.3143309e-05	7.6528819e-05
75	1.2319700e-02	1.3719688e-02	1.4710436e-02	1.5441183e-02	4.0839904e-03	4.5480873e-03	4.8765212e-03	5.1187645e-03	1.0388218e-03	1.1568715e-03	1.2404134e-03	1.3020315e-03	2.5977630e-04	2.8929679e-04	3.1018796e-04	3.2559668e-04	6.4931895e-05	7.2310633e-05	7.7532446e-05	8.1383903e-05
76	1.2575286e-02	1.4148872e-02	1.5259899e-02	1.6073723e-02	4.2374340e-03	4.7676778e-03	5.1420554e-03	5.4162858e-03	1.0791155e-03	1.2141486e-03	1.3094886e-03	1.3793248e-03	2.6985750e-04	3.0362564e-04	3.2746757e-04	3.4493171e-04	6.7450858e-05	7.5891201e-05	8.1850491e-05	8.6215649e-05
77	1.2756638e-02	1.4516612e-02	1.5761231e-02	1.6664997e-02	4.3686685e-03	4.9713933e-03	5.3976286e-03	5.7071343e-03	1.1138490e-03	1.2675216e-03	1.3761959e-03	1.4551084e-03	2.7854866e-04	3.1697873e-04	3.4415572e-04	3.6388996e-04	6.9622314e-05	7.9227781e-05	8.6020580e-05	9.0953089e-05
78	1.2859115e-02	1.4819276e-02	1.6211939e-02	1.7212867e-02	4.4747629e-03	5.1568672e-03	5.6414914e-03	5.9897978e-03	1.1422533e-03	1.3163711e-03	1.4400790e-03	1.5289897e-03	2.8565733e-04	3.2920112e-04	3.6013828e-04	3.8237326e-04	7.1398174e-05	8.2281657e-05	9.0014197e-05	9.5571685e-05
79	1.2877163e-02	1.5051813e-02	1.6606191e-02	1.7713188e-02	4.5520028e-03	5.3207289e-03	5.8701925e-03	6.2615096e-03	1.1633480e-03	1.3598101e-03	1.5002356e-03	1.6002439e-03	2.9093826e-04	3.4007088e-04	3.7518948e-04	4.0020026e-04	7.2717161e-05	8.4997377e-05	9.3774926e-05	1.0002612e-04
80	1.2808550e-02	1.5212377e-02	1.6941083e-02	1.8164460e-02	4.5980025e-03	5.4609262e-03	6.0814955e-03	6.5206624e-03	1.1764929e-03	1.3972895e-03	1.5560749e-03	1.6684447e-03	2.9423117e-04	3.4945060e-04	3.8916150e-04	4.1726427e-04	7.3539237e-05	8.7340610e-05	9.7265832e-05	1.0428975e-04
81	1.2650688e-02	1.5298260e-02	1.7212580e-02	1.8564183e-02	4.6100906e-03	5.5749036e-03	6.2725093e-03	6.7650525e-03	1.1809689e-03	1.4281255e-03	1.6068314e-03	1.7330064e-03	2.9535613e-04	3.5716911e-04	4.0186283e-04	4.3341875e-04	7.3819452e-05	8.9268599e-05	1.0043907e-04	1.0832596e-04
82	1.2399083e-02	1.5303745e-02	1.7415132e-02	1.8908264e-02	4.5847952e-03	5.6588490e-03	6.4395741e-03	6.9916877e-03	1.1758472e-03	1.4513062e-03	1.6515362e-03	1.7931349e-03	2.9408066e-04	3.6297326e-04	4.1305099e-04	4.4846498e-04	7.3499733e-05	9.0718096e-05	1.0323405e-04	1.1208509e-04
83	1.2051390e-02	1.5223455e-02	1.7544022e-02	1.9192747e-02	4.5193676e-03	5.7089173e-03	6.5791483e-03	7.1974334e-03	1.1603802e-03	1.4658056e-03	1.6892437e-03	1.8479928e-03	2.9021761e-04	3.6660623e-04	4.2248935e-04	4.6219341e-04	7.2533333e-05	9.1624943e-05	1.0559167e-04	1.1551480e-04
84	1.1614334e-02	1.5059686e-02	1.7602912e-02	1.9420738e-02	4.4154027e-03	5.7252162e-03	6.6920704e-03	7.3831503e-03	1.1349528e-03	1.4716325e-03	1.7201565e-03	1.8977945e-03	2.8386316e-04	3.6807016e-04	4.3022854e-04	4.7465759e-04	7.0944308e-05	9.1989686e-05	1.0752458e-04	1.1862848e-04
85	1.1092384e-02	1.4810127e-02	1.7589596e-02	1.9588445e-02	4.2730129e-03	5.7051632e-03	6.7758718e-03	7.5458691e-03	1.0995547e-03	1.4680834e-03	1.7436039e-03	1.9417438e-03	2.7501460e-04	3.6718897e-04	4.3610064e-04	4.8565830e-04	6.8732006e-05	9.1768343e-05	1.0899084e-04	1.2137635e-04
86	1.0490785e-02	1.4473068e-02	1.7502033e-02	1.9692119e-02	4.0928195e-03	5.6464467e-03	6.8281513e-03	7.6825799e-03	1.0543092e-03	1.4545231e-03	1.7589299e-03	1.9790304e-03	2.6370254e-04	3.6380357e-04	4.3994143e-04	4.9499272e-04	6.5904105e-05	9.0921188e-05	1.0994944e-04	1.2370776e-04
87	9.8173766e-03	1.4047319e-02	1.7338105e-02	1.9730163e-02	3.8770698e-03	5.5475552e-03	6.8471493e-03	7.7918187e-03	9.9976973e-04	1.4305334e-03	1.7656562e-03	2.0092556e-03	2.5006539e-04	3.5780928e-04	4.4163122e-04	5.0256102e-04	6.2495211e-05	8.9422076e-05	1.1037047e-04	1.2559778e-04
88	9.0799015e-03	1.3532381e-02	1.7094260e-02	1.9700000e-02	3.6279697e-03	5.4070047e-03	6.8301907e-03	7.8713415e-03	9.3647879e-04	1.3956967e-03	1.7630601e-03	2.0318098e-03	2.3423868e-04	3.4910150e-04	4.4098904e-04	5.0821060e-04	5.8539217e-05	8.7244890e-05	1.1020875e-04	1.2700827e-04
89	8.2894759e-03	1.2933985e-02	1.6770806e-02	1.9603000e-02	3.3495573e-03	5.2262803e-03	6.7766379e-03	7.9210524e-03	8.6546190e-04	1.3503714e-03	1.7509543e-03	2.0466493e-03	2.1647887e-04	3.3776979e-04	4.3796800e-04	5.1193048e-04	5.4100224e-05	8.4412032e-05	1.0945256e-04	1.2793652e-04
90	7.4602728e-03	1.2260353e-02	1.6369555e-02	1.9441688e-02	3.0474053e-03	5.0081634e-03	6.6867081e-03	7.9416267e-03	7.8814798e-04	1.2952573e-03	1.7293780e-03	2.0539366e-03	1.9714332e-04	3.2398906e-04	4.3257779e-04	5.1376123e-04	4.9267552e-05	8.0967228e-05	1.0810434e-04	1.2839267e-04
91	6.6070512e-03	1.1515751e-02	1.5887110e-02	1.9212010e-02	2.7269851e-03	4.7529950e-03	6.5572237e-03	7.9295383e-03	7.0593203e-04	1.2304033e-03	1.6974623e-03	2.0527121e-03	1.7658089e-04	3.0777143e-04	4.2460093e-04	5.1346264e-04	4.4128396e-05	7.6913530e-05	1.0610977e-04	1.2831673e-04
92	5.7511856e-03	1.0711318e-02	1.5326427e-02	1.8916862e-02	2.3978188e-03	4.4658270e-03	6.3899860e-03	7.8869316e-03	6.2128822e-04	1.1571207e-03	1.6556810e-03	2.0435479e-03	1.5541050e-04	2.8944489e-04	4.1415594e-04	5.1117789e-04	3.8837421e-05	7.2332905e-05	1.0349847e-04	1.2774446e-04
93	4.9110986e-03	9.8515520e-03	1.4682423e-02	1.8547007e-02	2.0673896e-03	4.1471364e-03	6.1807534e-03	7.8075989e-03	5.3614439e-04	1.0754934e-03	1.6028794e-03	2.0247758e-03	1.3411434e-04	2.6903031e-04	4.0095376e-04	5.0648942e-04	3.3515134e-05	6.7230597e-05	1.0019823e-04	1.2657156e-04
94	4.1077741e-03	8.9485119e-03	1.3962272e-02	1.8104131e-02	1.7453600e-03	3.8021504e-03	5.9324568e-03	7.6922991e-03	4.5301991e-04	9.8687366e-04	1.5398090e-03	1.9965879e-03	1.1332266e-04	2.4686587e-04	3.8518231e-04	4.9944528e-04	2.8319030e-05	6.1691119e-05	9.6256027e-05	1.2481004e-04
95	3.3603406e-03	8.0159327e-03	1.3173536e-02	1.7588800e-02	1.4406714e-03	3.4366531e-03	5.6478607e-03	7.5408074e-03	3.7424970e-04	8.9275487e-04	1.4671702e-03	1.9589095e-03	9.3619617e-05	2.2332515e-04	3.6701677e-04	4.9002675e-04	2.3395072e-05	5.5807834e-05	9.1715649e-05	1.2245522e-04
96	2.6838188e-03	7.0703407e-03	1.2323241e-02	1.7001122e-02	1.1606959e-03	3.0577754e-03	5.3295456e-03	7.3526318e-03	3.0176685e-04	7.9498451e-04	1.3856172e-03	1.9115951e-03	7.5488835e-05	1.9887027e-04	3.4662068e-04	4.7819728e-04	1.8864108e-05	4.9696227e-05	8.6617972e-05	1.1949800e-04
97	2.0916658e-03	6.1304917e-03	1.1417758e-02	1.6337246e-02	9.1224216e-04	2.6737029e-03	4.9796483e-03	7.1251938e-03	2.3736172e-04	6.9568666e-04	1.2956843e-03	1.8539466e-03	5.9378268e-05	1.7403257e-04	3.2412763e-04	4.6378219e-04	1.4838062e-05	4.3489077e-05	8.0996400e-05	1.1589474e-04
98	1.5907040e-03	5.2171700e-03	1.0465524e-02	1.5597467e-02	6.9943658e-04	2.2940029e-03	4.6017176e-03	6.8582459e-03	1.8213306e-04	5.9735762e-04	1.1982858e-03	1.7858850e-03	4.5562881e-05	1.4943654e-04	2.9976629e-04	4.4676165e-04	1.1385629e-05	3.7342436e-05	7.4908077e-05	1.1164049e-04
99	1.1806997e-03	4.3504935e-03	9.4772600e-03	1.4787273e-02	5.2330088e-04	1.9281932e-03	4.2004404e-03	6.5539045e-03	1.3637234e-04	5.0248766e-04	1.0946358e-03	1.7079492e-03	3.4115688e-05	1.2570520e-04	2.7384039e-04	4.2727038e-04	8.5250365e-06	3.1411982e-05	6.8428908e-05	1.0676893e-04
100	8.5619940e-04	3.5485241e-03	8.4648355e-03	1.3911271e-02	3.8238565e-04	1.5847999e-03	3.7804647e-03	6.2128873e-03	9.9724113e-05	4.1330724e-04	9.8592479e-04	1.6202875e-03	2.4947860e-05	1.0339657e-04	2.4664760e-04	4.0534533e-04	6.2340714e-06	2.5837150e-05	6.1633294e-05	1.0128932e-04
101	6.0723879e-04	2.8269196e-03	7.4473299e-03	1.2980314e-02	2.7325289e-04	1.2720926e-03	3.3512425e-03	5.8410437e-03	7.1315884e-05	3.3200163e-04	8.7463603e-04	1.5244457e-03	1.7841224e-05	8.3057450e-05	2.1880928e-04	3.8137335e-04	4.4581996e-06	2.0754556e-05	5.4676486e-05	9.5298309e-05
102	4.2060818e-04	2.1979256e-03	6.4419298e-03	1.1997797e-02	1.9065168e-04	9.9626736e-04	2.9199735e-03	5.4383160e-03	4.9793847e-05	2.6020219e-04	7.6263011e-04	1.4203634e-03	1.2457164e-05	6.5096021e-05	1.9079081e-04	3.5533908e-04	3.1127950e-06	1.6266188e-05	4.7674790e-05	8.8792098e-05
103	2.8386176e-04	1.6682435e-03	5.4714831e-03	1.0975671e-02	1.2960877e-04	7.6170524e-04	2.4982308e-03	5.0113942e-03	3.3875537e-05	1.9908509e-04	6.5295667e-04	1.3098162e-03	8.4749056e-06	4.9806660e-05	1.6335523e-04	3.2768687e-04	2.1176913e-06	1.2445582e-05	4.0818854e-05	8.1881693e-05
104	1.8619104e-04	1.2357770e-03	4.5534356e-03	9.9193557e-03	8.5608557e-05	5.6819643e-04	2.0936187e-03	4.5608088e-03	2.2391065e-05	1.4861275e-04	5.4758956e-04	1.1928873e-03	5.6018105e-06	3.7180031e-05	1.3699630e-04	2.9843730e-04	1.3997573e-06	9.2903929e-06	3.4232071e-05	7.4572283e-05
105	1.1846838e-04	8.9464613e-04	3.7078668e-03	8.8449400e-03	5.4845768e-05	4.1418269e-04	1.7165829e-03	4.0948269e-03	1.4355022e-05	1.0840584e-04	4.4928870e-04	1.0717569e-03	3.5913893e-06	2.7121350e-05	1.1240461e-04	2.6813586e-04	8.9739451e-07	6.7769180e-06	2.8086981e-05	6.7000159e-05
106	7.2877446e-05	6.3344816e-04	2.9489338e-03	7.7687683e-03	3.3967118e-05	2.9524098e-04	1.3744552e-03	3.6209099e-03	8.8964960e-06	7.7328026e-05	3.5999036e-04	9.4837045e-04	2.2257815e-06	1.9346413e-05	9.0064659e-05	2.3726930e-04	5.5616043e-07	4.8341266e-06	2.2504634e-05	5.9286950e-05
107	4.3106504e-05	4.3811287e-04	2.2893979e-03	6.7100272e-03	2.0223504e-05	2.0554155e-04	1.0740757e-03	3.1480230e-03	5.3004231e-06	5.3870840e-05	2.8150688e-04	8.2507232e-04	1.3261080e-06	1.3477896e-05	7.0429949e-05	2.0642409e-04	3.3135470e-07	3.3677229e-06	1.7598336e-05	5.1579202e-05
108	2.4603049e-05	2.9523659e-04	1.7350929e-03	5.6907347e-03	1.1618260e-05	1.3941912e-04	8.1936023e-04	2.6873269e-03	3.0471245e-06	3.6565494e-05	2.1489385e-04	7.0480603e-04	7.6236578e-07	9.1483893e-06	5.3764695e-05	1.7633674e-04	1.9049093e-07	2.2858912e-06	1.3434085e-05	4.4060936e-05
109	1.3304942e-05	1.9342060e-04	1.2837606e-03	4.7302396e-03	6.3235044e-06	9.1927945e-05	6.1013913e-04	2.2481639e-03	1.6595840e-06	2.4126202e-05	1.6012911e-04	5.9002360e-04	4.1521901e-07	6.0362464e-06	4.0063444e-05	1.4762074e-04	1.0374922e-07	1.5082543e-06	1.0010503e-05	3.6885442e-05
110	6.8662880e-06	1.2292330e-04	9.2828864e-04	3.8472984e-03	3.2839901e-06	5.8791432e-05	4.4397944e-04	1.8400757e-03	8.6244525e-07	1.5439874e-05	1.1659839e-04	4.8324280e-04	2.1578153e-07	3.8630156e-06	2.9172610e-05	1.2090607e-04	5.3916119e-08	9.6523003e-07	7.2891963e-06	3.0210122e-05
111	3.3724228e-06	7.5542271e-05	6.5661073e-04	3.0567641e-03	1.6231371e-06	3.6358272e-05	3.1602480e-04	1.4712115e-03	4.2655500e-07	9.5548320e-06	8.3050258e-05	3.8662945e-04	1.0672411e-07	2.3906200e-06	2.0779184e-05	9.6734731e-05	2.6666352e-08	5.9732629e-07	5.1919388e-06	2.4170382e-05
112	1.5276582e-06	4.4641568e-05	4.5371450e-04	2.3709256e-03	7.3979817e-07	2.1618546e-05	2.1972006e-04	1.1481668e-03	1.9454445e-07	5.6850211e-06	5.7779702e-05	3.0193299e-04	4.8675569e-08	1.4224083e-06	1.4456644e-05	7.5544483e-05	1.2162109e-08	3.5540385e-07	3.6121464e-06	1.8875593e-05
113	6.8334688e-07	2.5454671e-05	3.0545605e-04	1.7951523e-03	3.3294019e-07	1.2402022e-05	1.4882426e-04	8.7463387e-04	8.7610400e-08	3.2634874e-06	3.9161849e-05	2.3015252e-04	2.1920604e-08	8.1654252e-07	9.7985102e-06	5.7585428e-05	5.4770558e-09	2.0402033e-07	2.4482439e-06	1.4388226e-05
114	1.7191302e-07	1.3753042e-05	1.9993484e-04	1.3269966e-03	8.4263176e-08	6.7410541e-06	9.7998073e-05	6.5042745e-04	2.2187550e-08	1.7750040e-06	2.5804121e-05	1.7126570e-04	5.5515065e-09	4.4412052e-07	6.4564021e-06	4.2852079e-05	1.3870825e-09	1.1096660e-07	1.6131770e-06	1.0706890e-05
115	0.0000000e+00	7.0923762e-06	1.2697083e-04	9.5885466e-04	0.0000000e+00	3.4972727e-06	6.2609711e-05	4.7281421e-04	0.0000000e+00	9.2147910e-07	1.6496723e-05	1.2457948e-04	0.0000000e+00	2.3056410e-07	4.1276597e-06	3.1171141e-05	0.0000000e+00	5.7607616e-08	1.0313168e-06	7.7882687e-06
116	0.0000000e+00	3.4805449e-06	7.7964206e-05	6.7766209e-04	0.0000000e+00	1.7263842e-06	3.8671006e-05	3.3612700e-04	0.0000000e+00	4.5517000e-07	1.0195808e-05	8.8621599e-05	0.0000000e+00	1.1388970e-07	2.5511292e-06	2.2174324e-05	0.0000000e+00	2.8455714e-08	6.3740800e-07	5.5403275e-06
117	0.0000000e+00	1.5755662e-06	4.6041546e-05	4.6794317e-04	0.0000000e+00	7.8609975e-07	2.2971582e-05	2.3347163e-04	0.0000000e+00	2.0739375e-07	6.0605063e-06	6.1595944e-05	0.0000000e+00	5.1893281e-08	1.5164370e-06	1.5412304e-05	0.0000000e+00	1.2965611e-08	3.7888396e-07	3.8507864e-06
118	0.0000000e+00	7.0434223e-07	2.6236748e-05	3.1484098e-04	0.0000000e+00	3.5347461e-07	1.3166929e-05	1.5800315e-04	0.0000000e+00	9.3316400e-08	3.4760359e-06	4.1712431e-05	0.0000000e+00	2.3349527e-08	8.6976989e-07	1.0437239e-05	0.0000000e+00	5.8338699e-09	2.1731165e-07	2.6077398e-06
119	0.0000000e+00	1.7709015e-07	1.4167212e-05	2.0595584e-04	0.0000000e+00	8.9386546e-08	7.1509237e-06	1.0395655e-04	0.0000000e+00	2.3613050e-08	1.8890440e-06	2.7461977e-05	0.0000000e+00	5.9084944e-09	4.7267955e-07	6.8715790e-06	0.0000000e+00	1.4762241e-09	1.1809793e-07	1.7168487e-06
120	0.0000000e+00	0.0000000e+00	7.3009915e-06	1.3070555e-04	0.0000000e+00	0.0000000e+00	3.7061468e-06	6.6349068e-05	0.0000000e+00	0.0000000e+00	9.7967040e-07	1.7538490e-05	0.0000000e+00	0.0000000e+00	2.4513725e-07	4.3885547e-06	0.0000000e+00	0.0000000e+00	6.1246550e-08	1.0964626e-06
