# Supplementary material for: Quantifying the Potential for Future Gene Therapy to Lower Lifetime Risk of Polygenic Late-Onset Diseases
Source: MDPI journal article supplement (doi:10.3390/ijms20133352), 2019-07-08
Supplement: s2 [file s2 › SuppFiles/Results/LODsCommonLow/ColorectalCancer/EnvironmentArraySD.csv]

Age	Env	EnvSD	Incidence	CasesExpected
0	0	0	-1.24456e-05	0
1	0	0	-1.23286e-05	0
2	0	0	-1.21963e-05	0
3	0	0	-1.20468e-05	0
4	0	0	-1.18777e-05	0
5	0	0	-1.16864e-05	0
6	0	0	-1.14702e-05	0
7	0	0	-1.12258e-05	0
8	0	0	-1.09493e-05	0
9	0	0	-1.06368e-05	0
10	0	0	-1.02834e-05	0
11	0	0	-9.88381e-06	0
12	0	0	-9.43204e-06	0
13	0	0	-8.92126e-06	0
14	0	0	-8.34377e-06	0
15	0	0	-7.69089e-06	0
16	0	0	-6.95278e-06	0
17	0	0	-6.11834e-06	0
18	0	0	-5.17503e-06	0
19	0	0	-4.10869e-06	0
20	0	0	-2.90334e-06	0
21	0	0	-1.54089e-06	0
22	0	0	-9.83483e-10	0
23	5.76513e-07	2.891e-09	1.7394e-06	43
24	1.222e-06	6.22e-09	3.70623e-06	92
25	1.96651e-06	7.753e-09	5.92878e-06	148
26	2.79762e-06	1.149e-08	8.44007e-06	210
27	3.73701e-06	1.282e-08	1.12773e-05	281
28	4.80918e-06	1.167e-08	1.44825e-05	362
29	6.00781e-06	1.132e-08	1.81028e-05	452
30	7.36168e-06	1.209e-08	2.21915e-05	554
31	8.8997e-06	1.935e-08	2.68083e-05	670
32	1.06186e-05	1.572e-08	3.20205e-05	800
33	1.25733e-05	1.621e-08	3.79037e-05	947
34	1.47929e-05	2.458e-08	4.45425e-05	1113
35	1.73117e-05	8.516e-09	5.20322e-05	1300
36	2.01198e-05	2.667e-08	6.04792e-05	1511
37	2.33153e-05	2.231e-08	7.00025e-05	1749
38	2.68844e-05	2.781e-08	8.07352e-05	2017
39	3.09555e-05	2.983e-08	9.28257e-05	2319
40	3.55363e-05	3.302e-08	0.000106439	2659
41	4.06887e-05	2.79e-08	0.000121759	3041
42	4.65413e-05	3.821e-08	0.000138988	3471
43	5.30979e-05	4.869e-08	0.000158351	3955
44	6.05111e-05	5.601e-08	0.000180095	4497
45	6.88481e-05	5.109e-08	0.000204491	5105
46	7.81957e-05	4.05e-08	0.000231837	5787
47	8.87633e-05	4.065e-08	0.000262455	6550
48	0.000100568	5.322e-08	0.000296694	7402
49	0.000113834	6.461e-08	0.000334929	8354
50	0.000128725	8.342e-08	0.000377561	9414
51	0.00014545	1.127e-07	0.000425014	10593
52	0.000164135	8.581e-08	0.000477731	11902
53	0.000185058	8.467e-08	0.000536172	13352
54	0.000208301	1.049e-07	0.000600807	14953
55	0.000234235	1.014e-07	0.000672104	16718
56	0.000263002	8.835e-08	0.000750526	18656
57	0.00029496	9.1e-08	0.00083651	20778
58	0.000330289	1.011e-07	0.000930461	23092
59	0.000369289	1.868e-07	0.00103273	25606
60	0.000411959	1.303e-07	0.00114359	28326
61	0.000458808	1.366e-07	0.00126323	31253
62	0.000509975	1.387e-07	0.00139172	34389
63	0.000565199	2.022e-07	0.001529	37728
64	0.000625342	1.828e-07	0.00167488	41265
65	0.000689917	1.551e-07	0.00182897	44986
66	0.000759164	1.648e-07	0.00199073	48875
67	0.000833006	3.092e-07	0.00215944	52912
68	0.000911065	1.429e-07	0.00233421	57070
69	0.000993263	1.857e-07	0.00251398	61322
70	0.00107936	2.293e-07	0.00269756	65635
71	0.00116901	3.408e-07	0.00288366	69974
72	0.00126198	2.32e-07	0.00307089	74302
73	0.00135732	2.32e-07	0.00325786	78584
74	0.0014548	3.642e-07	0.00344316	82783
75	0.00155416	2.497e-07	0.00362543	86866
76	0.00165435	3.884e-07	0.00380343	90800
77	0.00175522	2.998e-07	0.00397599	94559
78	0.00185613	3.584e-07	0.00414215	98119
79	0.00195681	4.268e-07	0.00430105	101461
80	0.00205681	3.404e-07	0.00445206	104571
81	0.00215556	5.334e-07	0.00459469	107441
82	0.0022524	7.728e-07	0.00472863	110065
83	0.002348	5.497e-07	0.00485374	112443
84	0.0024418	7.726e-07	0.00497001	114578
85	0.00253324	9.522e-07	0.00507756	116476
86	0.00262245	3.919e-07	0.00517661	118145
87	0.00270917	9.227e-07	0.00526748	119597
88	0.00279366	8.273e-07	0.00535052	120842
89	0.0028764	6.563e-07	0.00542617	121895
90	0.00295635	1.029e-06	0.00549486	122769
91	0.00303519	5.446e-07	0.00555708	123476
92	0.00311133	9.576e-07	0.00561328	124032
93	0.00318557	8.702e-07	0.00566393	124448
94	0.00325817	7.019e-07	0.00570949	124740
95	0.00332929	7.492e-07	0.00575039	124916
96	0.00339865	8.105e-07	0.00578706	124989
97	0.00346656	7.337e-07	0.00581987	124970
98	0.00353342	7.624e-07	0.0058492	124868
99	0.0035982	9.157e-07	0.00587538	124694
100	0.00366286	5.686e-07	0.00589873	124453
101	0.00372569	7.191e-07	0.00591953	124156
102	0.00378921	5.421e-07	0.00593805	123807
103	0.00385057	8.747e-07	0.00595453	123413
104	0.00391145	7.129e-07	0.00596917	122979
105	0.00397165	9.272e-07	0.00598218	122511
106	0.00403074	7.319e-07	0.00599374	122014
107	0.0040901	6.965e-07	0.00600399	121490
108	0.00414896	4.331e-07	0.00601309	120944
109	0.00420705	7.261e-07	0.00602116	120378
110	0.00426555	4.491e-07	0.00602831	119795
111	0.00432321	5.32e-07	0.00603465	119199
112	0.00438052	6.488e-07	0.00604027	118589
113	0.00443751	5.143e-07	0.00604524	117970
114	0.00449502	8.556e-07	0.00604965	117342
115	0.0045517	9.46e-07	0.00605355	116708
116	0.00460875	6.942e-07	0.00605701	116067
117	0.00466582	6.45e-07	0.00606007	115422
118	0.00472261	1.126e-06	0.00606278	114775
119	0.00477888	1.186e-06	0.00606517	114123
