# Supplementary material for: Quantifying the Potential for Future Gene Therapy to Lower Lifetime Risk of Polygenic Late-Onset Diseases
Source: MDPI journal article supplement (doi:10.3390/ijms20133352), 2019-07-08
Supplement: s2 [file s2 › SuppFiles/Results/LODsCommonLow/ColorectalCancer/LifetimeRiskPostAnalysis.csv]

age	A..1..	A..2..	A..3..	A..4..	A..5..	A..6..	A..7..	A..8..	A..9..	A..10..	A..11..	A..12..	A..13..	A..14..	A..15..	A..16..	A..17..	A..18..	A..19..	A..20..
1	0.0000000e+00	0.0000000e+00	0.0000000e+00	0.0000000e+00	0.0000000e+00	0.0000000e+00	0.0000000e+00	0.0000000e+00	0.0000000e+00	0.0000000e+00	0.0000000e+00	0.0000000e+00	0.0000000e+00	0.0000000e+00	0.0000000e+00	0.0000000e+00	0.0000000e+00	0.0000000e+00	0.0000000e+00	0.0000000e+00
2	0.0000000e+00	0.0000000e+00	0.0000000e+00	0.0000000e+00	0.0000000e+00	0.0000000e+00	0.0000000e+00	0.0000000e+00	0.0000000e+00	0.0000000e+00	0.0000000e+00	0.0000000e+00	0.0000000e+00	0.0000000e+00	0.0000000e+00	0.0000000e+00	0.0000000e+00	0.0000000e+00	0.0000000e+00	0.0000000e+00
3	0.0000000e+00	0.0000000e+00	0.0000000e+00	0.0000000e+00	0.0000000e+00	0.0000000e+00	0.0000000e+00	0.0000000e+00	0.0000000e+00	0.0000000e+00	0.0000000e+00	0.0000000e+00	0.0000000e+00	0.0000000e+00	0.0000000e+00	0.0000000e+00	0.0000000e+00	0.0000000e+00	0.0000000e+00	0.0000000e+00
4	0.0000000e+00	0.0000000e+00	0.0000000e+00	0.0000000e+00	0.0000000e+00	0.0000000e+00	0.0000000e+00	0.0000000e+00	0.0000000e+00	0.0000000e+00	0.0000000e+00	0.0000000e+00	0.0000000e+00	0.0000000e+00	0.0000000e+00	0.0000000e+00	0.0000000e+00	0.0000000e+00	0.0000000e+00	0.0000000e+00
5	0.0000000e+00	0.0000000e+00	0.0000000e+00	0.0000000e+00	0.0000000e+00	0.0000000e+00	0.0000000e+00	0.0000000e+00	0.0000000e+00	0.0000000e+00	0.0000000e+00	0.0000000e+00	0.0000000e+00	0.0000000e+00	0.0000000e+00	0.0000000e+00	0.0000000e+00	0.0000000e+00	0.0000000e+00	0.0000000e+00
6	0.0000000e+00	0.0000000e+00	0.0000000e+00	0.0000000e+00	0.0000000e+00	0.0000000e+00	0.0000000e+00	0.0000000e+00	0.0000000e+00	0.0000000e+00	0.0000000e+00	0.0000000e+00	0.0000000e+00	0.0000000e+00	0.0000000e+00	0.0000000e+00	0.0000000e+00	0.0000000e+00	0.0000000e+00	0.0000000e+00
7	0.0000000e+00	0.0000000e+00	0.0000000e+00	0.0000000e+00	0.0000000e+00	0.0000000e+00	0.0000000e+00	0.0000000e+00	0.0000000e+00	0.0000000e+00	0.0000000e+00	0.0000000e+00	0.0000000e+00	0.0000000e+00	0.0000000e+00	0.0000000e+00	0.0000000e+00	0.0000000e+00	0.0000000e+00	0.0000000e+00
8	0.0000000e+00	0.0000000e+00	0.0000000e+00	0.0000000e+00	0.0000000e+00	0.0000000e+00	0.0000000e+00	0.0000000e+00	0.0000000e+00	0.0000000e+00	0.0000000e+00	0.0000000e+00	0.0000000e+00	0.0000000e+00	0.0000000e+00	0.0000000e+00	0.0000000e+00	0.0000000e+00	0.0000000e+00	0.0000000e+00
9	0.0000000e+00	0.0000000e+00	0.0000000e+00	0.0000000e+00	0.0000000e+00	0.0000000e+00	0.0000000e+00	0.0000000e+00	0.0000000e+00	0.0000000e+00	0.0000000e+00	0.0000000e+00	0.0000000e+00	0.0000000e+00	0.0000000e+00	0.0000000e+00	0.0000000e+00	0.0000000e+00	0.0000000e+00	0.0000000e+00
10	0.0000000e+00	0.0000000e+00	0.0000000e+00	0.0000000e+00	0.0000000e+00	0.0000000e+00	0.0000000e+00	0.0000000e+00	0.0000000e+00	0.0000000e+00	0.0000000e+00	0.0000000e+00	0.0000000e+00	0.0000000e+00	0.0000000e+00	0.0000000e+00	0.0000000e+00	0.0000000e+00	0.0000000e+00	0.0000000e+00
11	0.0000000e+00	0.0000000e+00	0.0000000e+00	0.0000000e+00	0.0000000e+00	0.0000000e+00	0.0000000e+00	0.0000000e+00	0.0000000e+00	0.0000000e+00	0.0000000e+00	0.0000000e+00	0.0000000e+00	0.0000000e+00	0.0000000e+00	0.0000000e+00	0.0000000e+00	0.0000000e+00	0.0000000e+00	0.0000000e+00
12	0.0000000e+00	0.0000000e+00	0.0000000e+00	0.0000000e+00	0.0000000e+00	0.0000000e+00	0.0000000e+00	0.0000000e+00	0.0000000e+00	0.0000000e+00	0.0000000e+00	0.0000000e+00	0.0000000e+00	0.0000000e+00	0.0000000e+00	0.0000000e+00	0.0000000e+00	0.0000000e+00	0.0000000e+00	0.0000000e+00
13	0.0000000e+00	0.0000000e+00	0.0000000e+00	0.0000000e+00	0.0000000e+00	0.0000000e+00	0.0000000e+00	0.0000000e+00	0.0000000e+00	0.0000000e+00	0.0000000e+00	0.0000000e+00	0.0000000e+00	0.0000000e+00	0.0000000e+00	0.0000000e+00	0.0000000e+00	0.0000000e+00	0.0000000e+00	0.0000000e+00
14	0.0000000e+00	0.0000000e+00	0.0000000e+00	0.0000000e+00	0.0000000e+00	0.0000000e+00	0.0000000e+00	0.0000000e+00	0.0000000e+00	0.0000000e+00	0.0000000e+00	0.0000000e+00	0.0000000e+00	0.0000000e+00	0.0000000e+00	0.0000000e+00	0.0000000e+00	0.0000000e+00	0.0000000e+00	0.0000000e+00
15	0.0000000e+00	0.0000000e+00	0.0000000e+00	0.0000000e+00	0.0000000e+00	0.0000000e+00	0.0000000e+00	0.0000000e+00	0.0000000e+00	0.0000000e+00	0.0000000e+00	0.0000000e+00	0.0000000e+00	0.0000000e+00	0.0000000e+00	0.0000000e+00	0.0000000e+00	0.0000000e+00	0.0000000e+00	0.0000000e+00
16	0.0000000e+00	0.0000000e+00	0.0000000e+00	0.0000000e+00	0.0000000e+00	0.0000000e+00	0.0000000e+00	0.0000000e+00	0.0000000e+00	0.0000000e+00	0.0000000e+00	0.0000000e+00	0.0000000e+00	0.0000000e+00	0.0000000e+00	0.0000000e+00	0.0000000e+00	0.0000000e+00	0.0000000e+00	0.0000000e+00
17	0.0000000e+00	0.0000000e+00	0.0000000e+00	0.0000000e+00	0.0000000e+00	0.0000000e+00	0.0000000e+00	0.0000000e+00	0.0000000e+00	0.0000000e+00	0.0000000e+00	0.0000000e+00	0.0000000e+00	0.0000000e+00	0.0000000e+00	0.0000000e+00	0.0000000e+00	0.0000000e+00	0.0000000e+00	0.0000000e+00
18	0.0000000e+00	0.0000000e+00	0.0000000e+00	0.0000000e+00	0.0000000e+00	0.0000000e+00	0.0000000e+00	0.0000000e+00	0.0000000e+00	0.0000000e+00	0.0000000e+00	0.0000000e+00	0.0000000e+00	0.0000000e+00	0.0000000e+00	0.0000000e+00	0.0000000e+00	0.0000000e+00	0.0000000e+00	0.0000000e+00
19	0.0000000e+00	0.0000000e+00	0.0000000e+00	0.0000000e+00	0.0000000e+00	0.0000000e+00	0.0000000e+00	0.0000000e+00	0.0000000e+00	0.0000000e+00	0.0000000e+00	0.0000000e+00	0.0000000e+00	0.0000000e+00	0.0000000e+00	0.0000000e+00	0.0000000e+00	0.0000000e+00	0.0000000e+00	0.0000000e+00
20	0.0000000e+00	0.0000000e+00	0.0000000e+00	0.0000000e+00	0.0000000e+00	0.0000000e+00	0.0000000e+00	0.0000000e+00	0.0000000e+00	0.0000000e+00	0.0000000e+00	0.0000000e+00	0.0000000e+00	0.0000000e+00	0.0000000e+00	0.0000000e+00	0.0000000e+00	0.0000000e+00	0.0000000e+00	0.0000000e+00
21	0.0000000e+00	0.0000000e+00	0.0000000e+00	0.0000000e+00	0.0000000e+00	0.0000000e+00	0.0000000e+00	0.0000000e+00	0.0000000e+00	0.0000000e+00	0.0000000e+00	0.0000000e+00	0.0000000e+00	0.0000000e+00	0.0000000e+00	0.0000000e+00	0.0000000e+00	0.0000000e+00	0.0000000e+00	0.0000000e+00
22	0.0000000e+00	0.0000000e+00	0.0000000e+00	0.0000000e+00	0.0000000e+00	0.0000000e+00	0.0000000e+00	0.0000000e+00	0.0000000e+00	0.0000000e+00	0.0000000e+00	0.0000000e+00	0.0000000e+00	0.0000000e+00	0.0000000e+00	0.0000000e+00	0.0000000e+00	0.0000000e+00	0.0000000e+00	0.0000000e+00
23	0.0000000e+00	0.0000000e+00	0.0000000e+00	0.0000000e+00	0.0000000e+00	0.0000000e+00	0.0000000e+00	0.0000000e+00	0.0000000e+00	0.0000000e+00	0.0000000e+00	0.0000000e+00	0.0000000e+00	0.0000000e+00	0.0000000e+00	0.0000000e+00	0.0000000e+00	0.0000000e+00	0.0000000e+00	0.0000000e+00
24	9.1071380e-06	9.1386804e-06	9.1524226e-06	9.1569418e-06	2.2770838e-06	2.2849704e-06	2.2884064e-06	2.2895364e-06	5.6927488e-07	5.7124655e-07	5.7210556e-07	5.7238805e-07	1.4231874e-07	1.4281165e-07	1.4302640e-07	1.4309703e-07	3.5579681e-08	3.5702911e-08	3.5756599e-08	3.5774254e-08
25	2.8390801e-05	2.8496229e-05	2.8546034e-05	2.8561303e-05	7.0993428e-06	7.1257058e-06	7.1381600e-06	7.1419783e-06	1.7748573e-06	1.7814481e-06	1.7845617e-06	1.7855163e-06	4.4371441e-07	4.4536212e-07	4.4614052e-07	4.4637917e-07	1.1092859e-07	1.1134052e-07	1.1153512e-07	1.1159478e-07
26	5.9389292e-05	5.9622876e-05	5.9742656e-05	5.9779625e-05	1.4852440e-05	1.4910856e-05	1.4940812e-05	1.4950058e-05	3.7131774e-06	3.7277818e-06	3.7352708e-06	3.7375823e-06	9.2829461e-07	9.3194570e-07	9.3381797e-07	9.3439584e-07	2.3207361e-07	2.3298638e-07	2.3345445e-07	2.3359892e-07
27	1.0343879e-04	1.0386495e-04	1.0410192e-04	1.0417871e-04	2.5871839e-05	2.5978429e-05	2.6037703e-05	2.6056908e-05	6.4681197e-06	6.4947678e-06	6.5095867e-06	6.5143880e-06	1.6170305e-06	1.6236926e-06	1.6273973e-06	1.6285976e-06	4.0425753e-07	4.0592304e-07	4.0684922e-07	4.0714930e-07
28	1.6220931e-04	1.6290369e-04	1.6332108e-04	1.6346746e-04	4.0576987e-05	4.0750690e-05	4.0855105e-05	4.0891724e-05	1.0144571e-05	1.0187999e-05	1.0214103e-05	1.0223258e-05	2.5361441e-06	2.5470010e-06	2.5535271e-06	2.5558159e-06	6.3403581e-07	6.3675002e-07	6.3838156e-07	6.3895375e-07
29	2.3774783e-04	2.3879691e-04	2.3947715e-04	2.3973805e-04	5.9482321e-05	5.9744797e-05	5.9914998e-05	5.9980278e-05	1.4871178e-05	1.4936799e-05	1.4979351e-05	1.4995672e-05	3.7177968e-06	3.7342022e-06	3.7448402e-06	3.7489204e-06	9.2944880e-07	9.3355015e-07	9.3620965e-07	9.3722969e-07
30	3.3199079e-04	3.3349389e-04	3.3453696e-04	3.3497495e-04	8.3075333e-05	8.3451468e-05	8.3712501e-05	8.3822115e-05	2.0769856e-05	2.0863895e-05	2.0929156e-05	2.0956561e-05	5.1924680e-06	5.2159777e-06	5.2322930e-06	5.2391443e-06	1.2981163e-06	1.3039937e-06	1.3080726e-06	1.3097854e-06
31	4.4731300e-04	4.4938753e-04	4.5090974e-04	4.5160934e-04	1.1195427e-04	1.1247351e-04	1.1285452e-04	1.1302965e-04	2.7990229e-05	2.8120045e-05	2.8215305e-05	2.8259090e-05	6.9975636e-06	7.0300177e-06	7.0538329e-06	7.0647791e-06	1.7493898e-06	1.7575033e-06	1.7634571e-06	1.7661936e-06
32	5.8652592e-04	5.8931162e-04	5.9144554e-04	5.9251742e-04	1.4682812e-04	1.4752550e-04	1.4805976e-04	1.4832814e-04	3.6709621e-05	3.6883980e-05	3.7017554e-05	3.7084656e-05	9.1774153e-06	9.2210052e-06	9.2543986e-06	9.2711741e-06	2.2943521e-06	2.3052495e-06	2.3135979e-06	2.3177918e-06
33	7.5237271e-04	7.5603116e-04	7.5892597e-04	7.6050964e-04	1.8839018e-04	1.8930628e-04	1.9003122e-04	1.9042786e-04	4.7101460e-05	4.7330506e-05	4.7511757e-05	4.7610927e-05	1.1775380e-05	1.1832642e-05	1.1877955e-05	1.1902747e-05	2.9438425e-06	2.9581578e-06	2.9694860e-06	2.9756841e-06
34	9.4842951e-04	9.5315498e-04	9.5697541e-04	9.5924502e-04	2.3754487e-04	2.3872849e-04	2.3968550e-04	2.4025412e-04	5.9391987e-05	5.9687922e-05	5.9927199e-05	6.0069370e-05	1.4848019e-05	1.4922003e-05	1.4981822e-05	1.5017365e-05	3.7120009e-06	3.7304969e-06	3.7454517e-06	3.7543374e-06
35	1.1786948e-03	1.1847198e-03	1.1896558e-03	1.1928170e-03	2.9530533e-04	2.9681493e-04	2.9805177e-04	2.9884401e-04	7.3834665e-05	7.4212109e-05	7.4521356e-05	7.4719444e-05	1.8458699e-05	1.8553060e-05	1.8630372e-05	1.8679894e-05	4.6146691e-06	4.6382594e-06	4.6575873e-06	4.6699678e-06
36	1.4476662e-03	1.4552662e-03	1.4615428e-03	1.4658280e-03	3.6281351e-04	3.6471843e-04	3.6629174e-04	3.6736611e-04	9.0715217e-05	9.1191511e-05	9.1584893e-05	9.1853526e-05	2.2678851e-05	2.2797924e-05	2.2896270e-05	2.2963428e-05	5.6697047e-06	5.6994731e-06	5.7240595e-06	5.7408491e-06
37	1.7596455e-03	1.7691453e-03	1.7770254e-03	1.7826897e-03	4.4116604e-04	4.4354809e-04	4.4552410e-04	4.4694485e-04	1.1030808e-04	1.1090368e-04	1.1139777e-04	1.1175301e-04	2.7577085e-05	2.7725986e-05	2.7849507e-05	2.7938319e-05	6.8942600e-06	6.9314853e-06	6.9623655e-06	6.9845685e-06
38	2.1203961e-03	2.1321923e-03	2.1419828e-03	2.1493128e-03	5.3183300e-04	5.3479217e-04	5.3724834e-04	5.3908771e-04	1.3298116e-04	1.3372109e-04	1.3433524e-04	1.3479518e-04	3.3245379e-05	3.3430361e-05	3.3583901e-05	3.3698885e-05	8.3113295e-06	8.3575749e-06	8.3959596e-06	8.4247056e-06
39	2.5354073e-03	2.5499730e-03	2.5620372e-03	2.5713396e-03	6.3622156e-04	6.3987734e-04	6.4290543e-04	6.4524093e-04	1.5908672e-04	1.6000086e-04	1.6075804e-04	1.6134204e-04	3.9771802e-05	4.0000337e-05	4.0189633e-05	4.0335635e-05	9.9429295e-06	1.0000063e-05	1.0047387e-05	1.0083887e-05
40	3.0120627e-03	3.0299690e-03	3.0447421e-03	3.0563700e-03	7.5622612e-04	7.6072297e-04	7.6443306e-04	7.6735402e-04	1.8909900e-04	1.9022348e-04	1.9115123e-04	1.9188165e-04	4.7274917e-05	4.7556038e-05	4.7787975e-05	4.7970582e-05	1.1818701e-05	1.1888981e-05	1.1946965e-05	1.1992617e-05
41	3.5577691e-03	3.5797008e-03	3.5976931e-03	3.6120609e-03	8.9375763e-04	8.9926896e-04	9.0379036e-04	9.0740185e-04	2.2349654e-04	2.2487475e-04	2.2600541e-04	2.2690854e-04	5.5874359e-05	5.6218913e-05	5.6501578e-05	5.6727362e-05	1.3968551e-05	1.4054690e-05	1.4125356e-05	1.4181802e-05
42	4.1807556e-03	4.2075387e-03	4.2293543e-03	4.2469489e-03	1.0509484e-03	1.0576839e-03	1.0631699e-03	1.0675956e-03	2.6281342e-04	2.6449782e-04	2.6586976e-04	2.6697654e-04	6.5703654e-05	6.6124754e-05	6.6467741e-05	6.6744437e-05	1.6425862e-05	1.6531137e-05	1.6616883e-05	1.6686057e-05
43	4.8910470e-03	4.9236885e-03	4.9500626e-03	4.9714499e-03	1.2304045e-03	1.2386201e-03	1.2452579e-03	1.2506418e-03	3.0770251e-04	3.0975714e-04	3.1141717e-04	3.1276363e-04	7.6926023e-05	7.7439683e-05	7.7854693e-05	7.8191312e-05	1.9231438e-05	1.9359852e-05	1.9463604e-05	1.9547759e-05
44	5.6985408e-03	5.7382625e-03	5.7700724e-03	5.7959226e-03	1.4347204e-03	1.4447274e-03	1.4527406e-03	1.4592537e-03	3.5881402e-04	3.6131679e-04	3.6332090e-04	3.6494984e-04	8.9704027e-05	9.0329725e-05	9.0830754e-05	9.1237994e-05	2.2425917e-05	2.2582341e-05	2.2707597e-05	2.2809407e-05
45	6.6151827e-03	6.6635028e-03	6.7017973e-03	6.7329057e-03	1.6670401e-03	1.6792264e-03	1.6888831e-03	1.6967289e-03	4.1693614e-04	4.1998412e-04	4.2239940e-04	4.2436176e-04	1.0423472e-04	1.0499672e-04	1.0560055e-04	1.0609114e-04	2.6058562e-05	2.6249061e-05	2.6400017e-05	2.6522665e-05
46	7.6536251e-03	7.7124404e-03	7.7584723e-03	7.7957684e-03	1.9307226e-03	1.9455738e-03	1.9571952e-03	1.9666122e-03	4.8291121e-04	4.8662598e-04	4.8953283e-04	4.9188832e-04	1.2072870e-04	1.2165740e-04	1.2238412e-04	1.2297300e-04	3.0182021e-05	3.0414195e-05	3.0595874e-05	3.0743092e-05
47	8.8274582e-03	8.8991193e-03	8.9543926e-03	8.9989712e-03	2.2294079e-03	2.2475278e-03	2.2615007e-03	2.2727707e-03	5.5765261e-04	5.6218531e-04	5.6568059e-04	5.6849977e-04	1.3941433e-04	1.4054751e-04	1.4142134e-04	1.4212614e-04	3.4853380e-05	3.5136675e-05	3.5355130e-05	3.5531330e-05
48	1.0152912e-02	1.0240342e-02	1.0306678e-02	1.0359864e-02	2.5674703e-03	2.5896122e-03	2.6064065e-03	2.6198720e-03	6.4225824e-04	6.4779751e-04	6.5199890e-04	6.5536753e-04	1.6056609e-04	1.6195092e-04	1.6300128e-04	1.6384345e-04	4.0141259e-05	4.0487465e-05	4.0750053e-05	4.0960593e-05
49	1.1645897e-02	1.1752731e-02	1.1832327e-02	1.1895694e-02	2.9492645e-03	2.9763685e-03	2.9965539e-03	3.0126230e-03	7.3782197e-04	7.4460326e-04	7.4965345e-04	7.5367376e-04	1.8445747e-04	1.8615281e-04	1.8741538e-04	1.8842047e-04	4.6114028e-05	4.6537860e-05	4.6853498e-05	4.7104768e-05
50	1.3324911e-02	1.3455644e-02	1.3551214e-02	1.3626629e-02	3.3798977e-03	3.4131312e-03	3.4374136e-03	3.4565724e-03	8.4562733e-04	8.5394310e-04	8.6001893e-04	8.6481274e-04	2.1140938e-04	2.1348836e-04	2.1500733e-04	2.1620580e-04	5.2851907e-05	5.3371645e-05	5.3751386e-05	5.4051001e-05
51	1.5209979e-02	1.5370150e-02	1.5485070e-02	1.5574749e-02	3.8649746e-03	3.9057834e-03	3.9350449e-03	3.9578745e-03	9.6708387e-04	9.7729640e-04	9.8461893e-04	9.9033184e-04	2.4177425e-04	2.4432743e-04	2.4615809e-04	2.4758634e-04	6.0442998e-05	6.1081285e-05	6.1538945e-05	6.1896004e-05
52	1.7323050e-02	1.7519516e-02	1.7657957e-02	1.7764558e-02	4.4107307e-03	4.4609135e-03	4.4962500e-03	4.5234500e-03	1.1037611e-03	1.1163212e-03	1.1251651e-03	1.1319725e-03	2.7594448e-04	2.7908456e-04	2.8129558e-04	2.8299747e-04	6.8985395e-05	6.9770406e-05	7.0323155e-05	7.0748621e-05
53	1.9686687e-02	1.9927799e-02	2.0094892e-02	2.0221592e-02	5.0237100e-03	5.0854710e-03	5.1282381e-03	5.1606506e-03	1.2573077e-03	1.2727681e-03	1.2834733e-03	1.2915864e-03	3.1433232e-04	3.1819749e-04	3.2087385e-04	3.2290217e-04	7.8582153e-05	7.9548432e-05	8.0217513e-05	8.0724586e-05
54	2.2325887e-02	2.2621743e-02	2.2823848e-02	2.2974475e-02	5.7112873e-03	5.7873105e-03	5.8391992e-03	5.8778454e-03	1.4295837e-03	1.4486176e-03	1.4616083e-03	1.4712833e-03	3.5740283e-04	3.6216140e-04	3.6540914e-04	3.6782795e-04	8.9349523e-05	9.0539146e-05	9.1351070e-05	9.1955762e-05
55	2.5265087e-02	2.5627774e-02	2.5872667e-02	2.6051893e-02	6.4808980e-03	6.5744206e-03	6.6375128e-03	6.6836475e-03	1.6224673e-03	1.6458870e-03	1.6616856e-03	1.6732373e-03	4.0562561e-04	4.1148067e-04	4.1543042e-04	4.1831844e-04	1.0140489e-04	1.0286863e-04	1.0385605e-04	1.0457805e-04
56	2.8531801e-02	2.8975708e-02	2.9272885e-02	2.9486477e-02	7.3410693e-03	7.4559783e-03	7.5328377e-03	7.5880212e-03	1.8381146e-03	1.8668959e-03	1.8861459e-03	1.8999663e-03	4.5953980e-04	4.6673533e-04	4.7154798e-04	4.7500316e-04	1.1488304e-04	1.1668188e-04	1.1788502e-04	1.1874880e-04
57	3.2153109e-02	3.2695159e-02	3.3056221e-02	3.3311215e-02	8.3005129e-03	8.4414244e-03	8.5352097e-03	8.6013626e-03	2.0787325e-03	2.1140349e-03	2.1375298e-03	2.1541012e-03	5.1969724e-04	5.2852313e-04	5.3439705e-04	5.3854002e-04	1.2992189e-04	1.3212831e-04	1.3359675e-04	1.3463247e-04
58	3.6158034e-02	3.6818202e-02	3.7257141e-02	3.7562115e-02	9.3688403e-03	9.5412600e-03	9.6558196e-03	9.7353047e-03	2.3467597e-03	2.3899670e-03	2.4186739e-03	2.4385901e-03	5.8670775e-04	5.9750998e-04	6.0468695e-04	6.0966618e-04	1.4667388e-04	1.4937436e-04	1.5116856e-04	1.5241334e-04
59	4.0574882e-02	4.1376484e-02	4.1909975e-02	4.2275421e-02	1.0555878e-02	1.0766308e-02	1.0906279e-02	1.1002016e-02	2.6446953e-03	2.6974430e-03	2.7325277e-03	2.7565230e-03	6.6119625e-04	6.7438373e-04	6.8315527e-04	6.8915433e-04	1.6529521e-04	1.6859198e-04	1.7078480e-04	1.7228453e-04
60	4.5432512e-02	4.6402343e-02	4.7050112e-02	4.7488721e-02	1.1872085e-02	1.2128098e-02	1.2299033e-02	1.2414594e-02	2.9752052e-03	3.0393991e-03	3.0822592e-03	3.1112325e-03	7.4382946e-04	7.5987866e-04	7.7059418e-04	7.7783783e-04	1.8595253e-04	1.8996470e-04	1.9264349e-04	1.9445435e-04
61	5.0756026e-02	5.1924640e-02	5.2709710e-02	5.3236704e-02	1.3327353e-02	1.3637707e-02	1.3846175e-02	1.3985898e-02	3.3408209e-03	3.4186671e-03	3.4709569e-03	3.5060004e-03	8.3524044e-04	8.5470299e-04	8.6777612e-04	8.7653745e-04	2.0880406e-04	2.1366952e-04	2.1693769e-04	2.1912794e-04
62	5.6572387e-02	5.7974598e-02	5.8923631e-02	5.9557355e-02	1.4932721e-02	1.5307549e-02	1.5561272e-02	1.5730453e-02	3.7443724e-03	3.8384259e-03	3.9020919e-03	3.9445406e-03	9.3613698e-04	9.5965173e-04	9.7556915e-04	9.8618192e-04	2.3402670e-04	2.3990515e-04	2.4388435e-04	2.4653744e-04
63	6.2905199e-02	6.4580608e-02	6.5724473e-02	6.6486655e-02	1.6698889e-02	1.7149911e-02	1.7457971e-02	1.7662978e-02	4.1886167e-03	4.3018351e-03	4.3791684e-03	4.4306283e-03	1.0472087e-03	1.0755151e-03	1.0948497e-03	1.1077155e-03	2.6179280e-04	2.6886909e-04	2.7370252e-04	2.7691883e-04
64	6.9770435e-02	7.1763609e-02	7.3137485e-02	7.4053433e-02	1.8634881e-02	1.9175512e-02	1.9548436e-02	1.9796804e-02	4.6758974e-03	4.8116700e-03	4.9053291e-03	4.9677030e-03	1.1690418e-03	1.2029873e-03	1.2264038e-03	1.2419984e-03	2.9224885e-04	3.0073483e-04	3.0658866e-04	3.1048711e-04
65	7.7188180e-02	7.9549834e-02	8.1193360e-02	8.2292482e-02	2.0751750e-02	2.1397537e-02	2.1847413e-02	2.2148056e-02	5.2090858e-03	5.3713449e-03	5.4843864e-03	5.5599269e-03	1.3023545e-03	1.3429225e-03	1.3711851e-03	1.3900717e-03	3.2557435e-04	3.3571579e-04	3.4278106e-04	3.4750246e-04
66	8.5167773e-02	8.7954985e-02	8.9912365e-02	9.1228267e-02	2.3057871e-02	2.3826646e-02	2.4367226e-02	2.4730519e-02	5.7903892e-03	5.9836496e-03	6.1195551e-03	6.2108878e-03	1.4476992e-03	1.4960185e-03	1.5299978e-03	1.5528330e-03	3.6190728e-04	3.7398639e-04	3.8248071e-04	3.8818916e-04
67	9.3714852e-02	9.6992162e-02	9.9312492e-02	1.0088315e-01	2.5561154e-02	2.6473470e-02	2.7120352e-02	2.7558259e-02	6.4219112e-03	6.6513837e-03	6.8141066e-03	6.9242628e-03	1.6056021e-03	1.6629757e-03	1.7036604e-03	1.7312021e-03	4.0137916e-04	4.1572162e-04	4.2589211e-04	4.3277708e-04
68	1.0282803e-01	1.0666799e-01	1.0940574e-01	1.1127408e-01	2.8267873e-02	2.9347302e-02	3.0118162e-02	3.0644484e-02	7.1053551e-03	7.3770236e-03	7.5710508e-03	7.7035316e-03	1.7764898e-03	1.8444141e-03	1.8929260e-03	1.9260498e-03	4.4409649e-04	4.6107633e-04	4.7320344e-04	4.8148376e-04
69	1.1249610e-01	1.1698055e-01	1.2019562e-01	1.2240947e-01	3.1181529e-02	3.2455187e-02	3.3369898e-02	3.4000346e-02	7.8417325e-03	8.1624892e-03	8.3928725e-03	8.5516693e-03	1.9606156e-03	2.0408140e-03	2.0984165e-03	2.1381204e-03	4.9012254e-04	5.1017055e-04	5.2457003e-04	5.3449520e-04
70	1.2270105e-01	1.2792244e-01	1.3168105e-01	1.3429267e-01	3.4303725e-02	3.5802848e-02	3.6883856e-02	3.7635998e-02	8.6315852e-03	9.0093800e-03	9.2818329e-03	9.4714159e-03	2.1581156e-03	2.2525761e-03	2.3206980e-03	2.3680999e-03	5.3949120e-04	5.6310430e-04	5.8013329e-04	5.9198271e-04
71	1.3341675e-01	1.3947958e-01	1.4385455e-01	1.4692073e-01	3.7633489e-02	3.9394079e-02	4.0666611e-02	4.1560003e-02	9.4748082e-03	9.9188163e-03	1.0239770e-02	1.0465123e-02	2.3689640e-03	2.4799812e-03	2.5602309e-03	2.6165770e-03	5.9219597e-04	6.1994767e-04	6.4000817e-04	6.5409335e-04
72	1.4460767e-01	1.5162997e-01	1.5670166e-01	1.6028380e-01	4.1166591e-02	4.3230101e-02	4.4722594e-02	4.5778882e-02	1.0370474e-02	1.0891275e-02	1.1267991e-02	1.1534639e-02	2.5929296e-03	2.7231492e-03	2.8173423e-03	2.8840146e-03	6.4817895e-04	6.8073049e-04	7.0427633e-04	7.2094265e-04
73	1.5623062e-01	1.6434521e-01	1.7020194e-01	1.7436649e-01	4.4895929e-02	4.7309909e-02	4.9054289e-02	5.0297448e-02	1.1316928e-02	1.1926673e-02	1.2367314e-02	1.2681387e-02	2.8295990e-03	2.9820599e-03	3.0922382e-03	3.1707696e-03	7.0733666e-04	7.4544764e-04	7.7298913e-04	7.9261974e-04
74	1.6823136e-01	1.7758525e-01	1.8432459e-01	1.8914282e-01	4.8809700e-02	5.1627848e-02	5.3660071e-02	5.5116413e-02	1.2311307e-02	1.3023740e-02	1.3537514e-02	1.3905751e-02	3.0782571e-03	3.2563966e-03	3.3848626e-03	3.4769384e-03	7.6949032e-04	8.1401981e-04	8.4613244e-04	8.6914856e-04
75	1.8055106e-01	1.9130494e-01	1.9903502e-01	2.0458400e-01	5.2893690e-02	5.6175936e-02	5.8536592e-02	6.0235177e-02	1.3350129e-02	1.4180612e-02	1.4777927e-02	1.5207783e-02	3.3380334e-03	3.5456934e-03	3.6950506e-03	3.8025351e-03	8.3442221e-04	8.8633044e-04	9.2366488e-04	9.5053246e-04
76	1.9312635e-01	2.0545381e-01	2.1429492e-01	2.2065772e-01	5.7131124e-02	6.0943614e-02	6.3678647e-02	6.5651463e-02	1.4429245e-02	1.5394760e-02	1.6087416e-02	1.6587107e-02	3.6078909e-03	3.8493190e-03	4.0225182e-03	4.1474668e-03	9.0187307e-04	9.6222164e-04	1.0055154e-03	1.0367481e-03
77	2.0588299e-01	2.1997043e-01	2.3005615e-01	2.3732272e-01	6.1499793e-02	6.5915007e-02	6.9076276e-02	7.1358597e-02	1.5543094e-02	1.6662282e-02	1.7463612e-02	1.8042216e-02	3.8864396e-03	4.1662977e-03	4.3666739e-03	4.5113568e-03	9.7149539e-04	1.0414494e-03	1.0915360e-03	1.1277012e-03
78	2.1874210e-01	2.3478970e-01	2.4626809e-01	2.5453559e-01	6.5974556e-02	7.1071874e-02	7.4717767e-02	7.7348395e-02	1.6685347e-02	1.7978653e-02	1.8903691e-02	1.9571205e-02	4.1720969e-03	4.4954988e-03	4.7268122e-03	4.8937300e-03	1.0428936e-03	1.1237311e-03	1.1815502e-03	1.2232729e-03
79	2.3161926e-01	2.4984152e-01	2.6287428e-01	2.7224877e-01	7.0526558e-02	7.6392603e-02	8.0587960e-02	8.3609905e-02	1.7848695e-02	1.9338463e-02	2.0403926e-02	2.1171449e-02	4.4630352e-03	4.8355697e-03	5.1020017e-03	5.2939303e-03	1.1156107e-03	1.2087285e-03	1.2753251e-03	1.3232990e-03
80	2.4442781e-01	2.6505389e-01	2.7981537e-01	2.9041323e-01	7.5124561e-02	8.1853529e-02	8.6669455e-02	9.0130567e-02	1.9025188e-02	2.0735753e-02	2.1960001e-02	2.2839894e-02	4.7572664e-03	5.1850203e-03	5.4911632e-03	5.7111945e-03	1.1891500e-03	1.2960691e-03	1.3725909e-03	1.4275888e-03
81	2.5707850e-01	2.8035215e-01	2.9702795e-01	3.0897742e-01	7.9734651e-02	8.7428433e-02	9.2941965e-02	9.6895620e-02	2.0206157e-02	2.2163878e-02	2.3566833e-02	2.4572901e-02	5.0526225e-03	5.5421894e-03	5.8930260e-03	6.1446133e-03	1.2629694e-03	1.3853377e-03	1.4730300e-03	1.5359147e-03
82	2.6947759e-01	2.9565590e-01	3.1444308e-01	3.2788568e-01	8.4319447e-02	9.3087282e-02	9.9381539e-02	1.0388731e-01	2.1382004e-02	2.3615184e-02	2.5218369e-02	2.6366035e-02	5.3467031e-03	5.9051627e-03	6.3060770e-03	6.5930783e-03	1.3364691e-03	1.4760558e-03	1.5762640e-03	1.6479998e-03
83	2.8152898e-01	3.1087935e-01	3.3198710e-01	3.4707843e-01	8.8838814e-02	9.8796199e-02	1.0596069e-01	1.1108474e-01	2.2542384e-02	2.5080990e-02	2.6907613e-02	2.8214028e-02	5.6369208e-03	6.2717689e-03	6.7285663e-03	7.0552717e-03	1.4090025e-03	1.5676807e-03	1.6818557e-03	1.7635146e-03
84	2.9314331e-01	3.2593904e-01	3.4959001e-01	3.6649916e-01	9.3254217e-02	1.0452142e-01	1.1265276e-01	1.1846789e-01	2.3677337e-02	2.6552622e-02	2.8627769e-02	3.0111823e-02	5.9207839e-03	6.6398391e-03	7.1587949e-03	7.5299293e-03	1.4799468e-03	1.6596704e-03	1.7893803e-03	1.8821431e-03
85	3.0423569e-01	3.4074916e-01	3.6717961e-01	3.8608761e-01	9.7527230e-02	1.1022658e-01	1.1942863e-01	1.2601376e-01	2.4776892e-02	2.8020706e-02	3.0371373e-02	3.2053567e-02	6.1957985e-03	7.0070280e-03	7.5948955e-03	8.0155876e-03	1.5486788e-03	1.7514387e-03	1.8983711e-03	2.0035194e-03
86	3.1472648e-01	3.5522223e-01	3.8468164e-01	4.0577973e-01	1.0162005e-01	1.1587303e-01	1.2625678e-01	1.3369634e-01	2.5831201e-02	2.9475229e-02	3.2130303e-02	3.4032597e-02	6.4595011e-03	7.3708316e-03	8.0348369e-03	8.5105803e-03	1.6145829e-03	1.8423599e-03	2.0083205e-03	2.1272272e-03
87	3.2454386e-01	3.6926955e-01	4.0201975e-01	4.2550989e-01	1.0549712e-01	1.2142058e-01	1.3310393e-01	1.4148816e-01	2.6830970e-02	3.0905762e-02	3.3895959e-02	3.6041853e-02	6.7095664e-03	7.7286409e-03	8.4764682e-03	9.0131413e-03	1.6770781e-03	1.9317820e-03	2.1186910e-03	2.2528250e-03
88	3.3362376e-01	3.8280193e-01	4.1911401e-01	4.4520989e-01	1.0912509e-01	1.2682759e-01	1.3993412e-01	1.4935950e-01	2.7767449e-02	3.2301459e-02	3.5659019e-02	3.8073662e-02	6.9438051e-03	8.0777424e-03	8.9174572e-03	9.5213519e-03	1.7356173e-03	2.0190269e-03	2.2288998e-03	2.3798332e-03
89	3.4191323e-01	3.9573592e-01	4.3588481e-01	4.6481289e-01	1.1247465e-01	1.3205387e-01	1.4671076e-01	1.5728055e-01	2.8632911e-02	3.3651830e-02	3.7409974e-02	4.0120312e-02	7.1602840e-03	8.4155122e-03	9.3554252e-03	1.0033282e-02	1.7897175e-03	2.1034389e-03	2.3383523e-03	2.5077698e-03
90	3.4937351e-01	4.0799627e-01	4.5225437e-01	4.8425458e-01	1.1552205e-01	1.3706203e-01	1.5339747e-01	1.6522218e-01	2.9421059e-02	3.4947088e-02	3.9139351e-02	4.2174248e-02	7.3574273e-03	8.7395012e-03	9.7880030e-03	1.0547044e-02	1.8389851e-03	2.1844061e-03	2.4464567e-03	2.6361624e-03
91	3.5598056e-01	4.1951202e-01	4.6814148e-01	5.0346659e-01	1.1824904e-01	1.4181502e-01	1.5995469e-01	1.7315172e-01	3.0126991e-02	3.6177491e-02	4.0836814e-02	4.4226960e-02	7.5340082e-03	9.0472727e-03	1.0212604e-02	1.1060506e-02	1.8831135e-03	2.2613197e-03	2.5525664e-03	2.7644792e-03
92	3.6173174e-01	4.3022334e-01	4.8346790e-01	5.2238345e-01	1.2064686e-01	1.4628085e-01	1.6634468e-01	1.8103865e-01	3.0748279e-02	3.7334612e-02	4.2492495e-02	4.6270508e-02	7.6894187e-03	9.3367176e-03	1.0626760e-02	1.1571684e-02	1.9219509e-03	2.3336526e-03	2.6560649e-03	2.8922236e-03
93	3.6664284e-01	4.4007489e-01	4.9815033e-01	5.4093046e-01	1.2271424e-01	1.5042799e-01	1.7252543e-01	1.8884625e-01	3.1284424e-02	3.8410105e-02	4.4095374e-02	4.8295284e-02	7.8235330e-03	9.6057479e-03	1.1027714e-02	1.2078174e-02	1.9554660e-03	2.4008832e-03	2.7562631e-03	3.0187952e-03
94	3.7075061e-01	4.4902341e-01	5.1211260e-01	5.5903459e-01	1.2445960e-01	1.5423014e-01	1.7845789e-01	1.9653855e-01	3.1737444e-02	3.9396979e-02	4.5635183e-02	5.0291872e-02	7.9368557e-03	9.8526137e-03	1.1412896e-02	1.2577619e-02	1.9837851e-03	2.4625743e-03	2.8525192e-03	3.1436052e-03
95	3.7411096e-01	4.5703934e-01	5.2528614e-01	5.7662339e-01	1.2590028e-01	1.5766679e-01	1.8410575e-01	2.0407935e-01	3.2111693e-02	4.0289734e-02	4.7102353e-02	5.2250781e-02	8.0304753e-03	1.0075939e-02	1.1779913e-02	1.3067646e-02	2.0071802e-03	2.5183821e-03	2.9442348e-03	3.2660605e-03
96	3.7679477e-01	4.6410968e-01	5.3760938e-01	5.9362451e-01	1.2706097e-01	1.6072457e-01	1.8943529e-01	2.1143199e-01	3.2413460e-02	4.1084718e-02	4.8487971e-02	5.4162376e-02	8.1059642e-03	1.0274809e-02	1.2126533e-02	1.3545843e-02	2.0260443e-03	2.5680784e-03	3.0308528e-03	3.3855585e-03
97	3.7888644e-01	4.7024017e-01	5.4902714e-01	6.0996176e-01	1.2797321e-01	1.6339827e-01	1.9441494e-01	2.1855718e-01	3.2650822e-02	4.1780405e-02	4.9783655e-02	5.6016323e-02	8.1653424e-03	1.0448842e-02	1.2450661e-02	1.4009625e-02	2.0408823e-03	2.6115674e-03	3.1118492e-03	3.5014532e-03
98	3.8047714e-01	4.7545734e-01	5.5949266e-01	6.2555922e-01	1.2867265e-01	1.6569227e-01	1.9901666e-01	2.2541543e-01	3.2832955e-02	4.2377762e-02	5.0981941e-02	5.7802208e-02	8.2109053e-03	1.0598278e-02	1.2750427e-02	1.4456387e-02	2.0522680e-03	2.6489099e-03	3.1867573e-03	3.6130937e-03
99	3.8165784e-01	4.7980783e-01	5.6896992e-01	6.4034650e-01	1.2919595e-01	1.6762047e-01	2.0321710e-01	2.3196933e-01	3.2969327e-02	4.2880250e-02	5.2076577e-02	5.9510157e-02	8.2450210e-03	1.0723983e-02	1.3024268e-02	1.4883657e-02	2.0607930e-03	2.6803219e-03	3.2551862e-03	3.7198626e-03
100	3.8251404e-01	4.8335636e-01	5.7743476e-01	6.5425777e-01	1.2957834e-01	1.6920527e-01	2.0699756e-01	2.3818222e-01	3.3069051e-02	4.3293557e-02	5.3062501e-02	6.1130445e-02	8.2699689e-03	1.0827380e-02	1.3270915e-02	1.5289002e-02	2.0670271e-03	2.7061590e-03	3.3168195e-03	3.8211519e-03
101	3.8312128e-01	4.8618328e-01	5.8488209e-01	6.6723808e-01	1.2985159e-01	1.7047736e-01	2.1034881e-01	2.4402326e-01	3.3140367e-02	4.3625559e-02	5.3937137e-02	6.2654890e-02	8.2878101e-03	1.0910437e-02	1.3489725e-02	1.5670376e-02	2.0714853e-03	2.7269136e-03	3.3714960e-03	3.9164502e-03
102	3.8354189e-01	4.8838120e-01	5.9132402e-01	6.7923588e-01	1.3004224e-01	1.7147363e-01	2.1326878e-01	2.4946158e-01	3.3190161e-02	4.3885761e-02	5.4699767e-02	6.4075254e-02	8.3002672e-03	1.0975533e-02	1.3680515e-02	1.6025715e-02	2.0745981e-03	2.7431797e-03	3.4191707e-03	4.0052423e-03
103	3.8382575e-01	4.9004945e-01	5.9679550e-01	6.9021155e-01	1.3017185e-01	1.7223533e-01	2.1576701e-01	2.5447297e-01	3.3224037e-02	4.4084846e-02	5.5352724e-02	6.5385070e-02	8.3087422e-03	1.1025340e-02	1.3843871e-02	1.6353402e-02	2.0767157e-03	2.7556253e-03	3.4599896e-03	4.0871240e-03
104	3.8401194e-01	4.9128522e-01	6.0134893e-01	7.0013091e-01	1.3025746e-01	1.7280353e-01	2.1786063e-01	2.5903378e-01	3.3246428e-02	4.4233459e-02	5.5900314e-02	6.6577957e-02	8.3143440e-03	1.1062520e-02	1.3980867e-02	1.6651839e-02	2.0781155e-03	2.7649157e-03	3.4942217e-03	4.1616963e-03
105	3.8413041e-01	4.9217987e-01	6.0505680e-01	7.0897585e-01	1.3031231e-01	1.7321771e-01	2.1957721e-01	2.6312861e-01	3.3260783e-02	4.4341865e-02	5.6349602e-02	6.7649714e-02	8.3179354e-03	1.1089642e-02	1.4093272e-02	1.6919975e-02	2.0790129e-03	2.7716926e-03	3.5223087e-03	4.2286965e-03
106	3.8420329e-01	4.9281332e-01	6.0800573e-01	7.1674461e-01	1.3034627e-01	1.7351295e-01	2.2095167e-01	2.6674952e-01	3.3269679e-02	4.4419193e-02	5.6709593e-02	6.8598085e-02	8.3201611e-03	1.1108988e-02	1.4183336e-02	1.7157244e-02	2.0795691e-03	2.7765268e-03	3.5448133e-03	4.2879834e-03
107	3.8424640e-01	4.9325143e-01	6.1029513e-01	7.2345464e-01	1.3036650e-01	1.7371849e-01	2.2202574e-01	2.6989754e-01	3.3274980e-02	4.4473064e-02	5.6991100e-02	6.9423157e-02	8.3214872e-03	1.1122466e-02	1.4253766e-02	1.7363668e-02	2.0799004e-03	2.7798945e-03	3.5624116e-03	4.3395626e-03
108	3.8427100e-01	4.9354667e-01	6.1203022e-01	7.2914538e-01	1.3037811e-01	1.7385791e-01	2.2284510e-01	2.7258487e-01	3.3278027e-02	4.4509629e-02	5.7205994e-02	7.0127963e-02	8.3222496e-03	1.1131614e-02	1.4307531e-02	1.7540005e-02	2.0800909e-03	2.7821804e-03	3.5758457e-03	4.3836236e-03
109	3.8428430e-01	4.9374009e-01	6.1331399e-01	7.3387562e-01	1.3038444e-01	1.7394984e-01	2.2345524e-01	2.7483303e-01	3.3279686e-02	4.4533755e-02	5.7366123e-02	7.0717987e-02	8.3226648e-03	1.1137650e-02	1.4347594e-02	1.7687626e-02	2.0801947e-03	2.7836886e-03	3.5858562e-03	4.4205090e-03
110	3.8429117e-01	4.9386301e-01	6.1424227e-01	7.3772291e-01	1.3038772e-01	1.7400863e-01	2.2389922e-01	2.7667311e-01	3.3280549e-02	4.4549195e-02	5.7482721e-02	7.1201229e-02	8.3228806e-03	1.1141513e-02	1.4376767e-02	1.7808532e-02	2.0802486e-03	2.7846539e-03	3.5931454e-03	4.4507191e-03
111	3.8429454e-01	4.9393855e-01	6.1489888e-01	7.4077968e-01	1.3038934e-01	1.7404499e-01	2.2421525e-01	2.7814432e-01	3.3280975e-02	4.4558750e-02	5.7565771e-02	7.1587859e-02	8.3229873e-03	1.1143904e-02	1.4397546e-02	1.7905267e-02	2.0802752e-03	2.7852512e-03	3.5983374e-03	4.4748895e-03
112	3.8429607e-01	4.9398320e-01	6.1535260e-01	7.4315060e-01	1.3039008e-01	1.7406661e-01	2.2443497e-01	2.7929249e-01	3.3281170e-02	4.4564435e-02	5.7623551e-02	7.1889792e-02	8.3230360e-03	1.1145327e-02	1.4412003e-02	1.7980811e-02	2.0802874e-03	2.7856066e-03	3.6019495e-03	4.4937651e-03
113	3.8429675e-01	4.9400865e-01	6.1565806e-01	7.4494576e-01	1.3039042e-01	1.7407901e-01	2.2458379e-01	2.8016712e-01	3.3281258e-02	4.4567699e-02	5.7662713e-02	7.2119944e-02	8.3230579e-03	1.1146143e-02	1.4421801e-02	1.8038396e-02	2.0802929e-03	2.7858106e-03	3.6043977e-03	4.5081533e-03
114	3.8429692e-01	4.9402240e-01	6.1585799e-01	7.4627275e-01	1.3039050e-01	1.7408575e-01	2.2468179e-01	2.8081755e-01	3.3281280e-02	4.4569474e-02	5.7688517e-02	7.2291210e-02	8.3230635e-03	1.1146587e-02	1.4428258e-02	1.8081249e-02	2.0802943e-03	2.7859216e-03	3.6060109e-03	4.5188602e-03
115	3.8429692e-01	4.9402950e-01	6.1598496e-01	7.4723161e-01	1.3039050e-01	1.7408925e-01	2.2474440e-01	2.8129036e-01	3.3281280e-02	4.4570395e-02	5.7705014e-02	7.2415790e-02	8.3230635e-03	1.1146818e-02	1.4432385e-02	1.8112420e-02	2.0802943e-03	2.7859792e-03	3.6070422e-03	4.5266485e-03
116	3.8429692e-01	4.9403298e-01	6.1606293e-01	7.4790927e-01	1.3039050e-01	1.7409097e-01	2.2478307e-01	2.8162649e-01	3.3281280e-02	4.4570850e-02	5.7715209e-02	7.2504411e-02	8.3230635e-03	1.1146932e-02	1.4434936e-02	1.8134594e-02	2.0802943e-03	2.7860076e-03	3.6076796e-03	4.5321888e-03
117	3.8429692e-01	4.9403455e-01	6.1610897e-01	7.4837721e-01	1.3039050e-01	1.7409176e-01	2.2480604e-01	2.8185996e-01	3.3281280e-02	4.4571058e-02	5.7721270e-02	7.2566007e-02	8.3230635e-03	1.1146984e-02	1.4436453e-02	1.8150006e-02	2.0802943e-03	2.7860206e-03	3.6080585e-03	4.5360396e-03
118	3.8429692e-01	4.9403526e-01	6.1613520e-01	7.4869205e-01	1.3039050e-01	1.7409211e-01	2.2481921e-01	2.8201796e-01	3.3281280e-02	4.4571151e-02	5.7724746e-02	7.2607720e-02	8.3230635e-03	1.1147007e-02	1.4437323e-02	1.8160444e-02	2.0802943e-03	2.7860264e-03	3.6082758e-03	4.5386473e-03
119	3.8429692e-01	4.9403543e-01	6.1614937e-01	7.4889801e-01	1.3039050e-01	1.7409220e-01	2.2482636e-01	2.8212192e-01	3.3281280e-02	4.4571175e-02	5.7726635e-02	7.2635182e-02	8.3230635e-03	1.1147013e-02	1.4437795e-02	1.8167315e-02	2.0802943e-03	2.7860279e-03	3.6083939e-03	4.5403642e-03
120	3.8429692e-01	4.9403543e-01	6.1615667e-01	7.4902871e-01	1.3039050e-01	1.7409220e-01	2.2483007e-01	2.8218827e-01	3.3281280e-02	4.4571175e-02	5.7727615e-02	7.2652720e-02	8.3230635e-03	1.1147013e-02	1.4438040e-02	1.8171704e-02	2.0802943e-03	2.7860279e-03	3.6084552e-03	4.5414607e-03
