# Supplementary material for: Quantifying the Potential for Future Gene Therapy to Lower Lifetime Risk of Polygenic Late-Onset Diseases
Source: MDPI journal article supplement (doi:10.3390/ijms20133352), 2019-07-08
Supplement: s2 [file s2 › SuppFiles/Results/LODsCommonLow/LungCancer/-1.000/FrailtyAnalysis.csv]

Age	Heritability	MeanOR	CaseOR	nControls	nCases	nCumIncidence	nIncidence	nLifeIncidence0	nAbsIncidence0	nLifeIncidence5	nAbsIncidence5	nLifeIncidence10	nAbsIncidence10	nLifeIncidence15	nAbsIncidence15	nIncActDivExp
27	0.0354887	0.785998	0.869756	999999380	620	6.2e-07	6.2e-07	6.10542e-07	6.10542e-07	6.13211e-07	6.13211e-07	6.14835e-07	6.14835e-07	6.15387e-07	6.15387e-07	0.715913
28	0.0354888	0.785998	0.85793	999998109	1271	1.891e-06	1.271e-06	1.86095e-06	1.2504e-06	1.86932e-06	1.25611e-06	1.87478e-06	1.25995e-06	1.87682e-06	1.26143e-06	0.675398
29	0.0354888	0.785998	0.867503	999996003	2106	3.997e-06	2.106e-06	3.93079e-06	2.06984e-06	3.94888e-06	2.07956e-06	3.96155e-06	2.08676e-06	3.96672e-06	2.0899e-06	0.6853
30	0.0354888	0.785998	0.859728	999992960	3043	7.04e-06	3.04301e-06	6.91851e-06	2.98772e-06	6.951e-06	3.00212e-06	6.97517e-06	3.01362e-06	6.98595e-06	3.01923e-06	0.680762
31	0.0354889	0.785997	0.863888	999988827	4133	1.1173e-05	4.13303e-06	1.09722e-05	4.05367e-06	1.10248e-05	4.07375e-06	1.10658e-05	4.0906e-06	1.10857e-05	4.09979e-06	0.676667
32	0.0354889	0.785997	0.856457	999983355	5472	1.6645e-05	5.47206e-06	1.63333e-05	5.36114e-06	1.64133e-05	5.38852e-06	1.64778e-05	5.41208e-06	1.65122e-05	5.42642e-06	0.681598
33	0.035489	0.785997	0.861788	999976329	7026	2.3671e-05	7.02612e-06	2.32093e-05	6.87596e-06	2.33254e-05	6.91214e-06	2.34215e-05	6.94369e-06	2.34771e-05	6.96491e-06	0.683503
34	0.0354891	0.785996	0.860364	999967466	8863	3.2534e-05	8.86321e-06	3.18729e-05	8.66367e-06	3.20362e-05	8.71082e-06	3.21733e-05	8.75173e-06	3.22591e-05	8.78204e-06	0.686086
35	0.0354893	0.785995	0.860041	999956406	11060	4.3594e-05	1.10604e-05	4.26711e-05	1.07982e-05	4.28953e-05	1.08591e-05	4.30847e-05	1.09114e-05	4.32123e-05	1.09532e-05	0.690779
36	0.0354894	0.785994	0.862328	999942886	13520	5.7114e-05	1.35206e-05	5.58544e-05	1.31833e-05	5.61558e-05	1.32605e-05	5.64109e-05	1.33262e-05	5.65936e-05	1.33813e-05	0.688567
37	0.0354896	0.785993	0.861676	999926501	16385	7.3499e-05	1.63859e-05	7.18103e-05	1.59559e-05	7.22089e-05	1.6053e-05	7.25459e-05	1.6135e-05	7.27992e-05	1.62056e-05	0.686113
38	0.0354899	0.785992	0.862877	999906396	20105	9.3604e-05	2.01065e-05	9.13615e-05	1.95512e-05	9.18845e-05	1.96757e-05	9.23251e-05	1.97792e-05	9.26687e-05	1.98695e-05	0.696776
39	0.0354902	0.78599	0.862394	999882441	23955	0.000117559	2.39572e-05	0.000114622	2.3261e-05	0.000115301	2.34163e-05	0.000115869	2.35437e-05	0.000116323	2.36542e-05	0.690779
40	0.0354905	0.785988	0.861728	999853740	28701	0.00014626	2.87044e-05	0.000142449	2.78265e-05	0.000143322	2.80215e-05	0.000144048	2.81796e-05	0.000144638	2.83154e-05	0.691655
41	0.035491	0.785985	0.863113	999819778	33962	0.000180222	3.3967e-05	0.000175323	3.28737e-05	0.000176438	3.31162e-05	0.000177359	3.33101e-05	0.000178113	3.34752e-05	0.686452
42	0.0354914	0.785982	0.861	999779128	40650	0.000220872	4.06573e-05	0.000214602	3.92795e-05	0.000216024	3.95854e-05	0.000217185	3.98264e-05	0.000218143	4.00299e-05	0.691237
43	0.035492	0.785979	0.859575	999731166	47962	0.000268834	4.79726e-05	0.000260861	4.62593e-05	0.000262665	4.66409e-05	0.000264123	4.69378e-05	0.000265328	4.71848e-05	0.687928
44	0.0354927	0.785975	0.863525	999674442	56724	0.000325558	5.67393e-05	0.000315463	5.4602e-05	0.000317745	5.50807e-05	0.000319571	5.54483e-05	0.000321078	5.575e-05	0.687815
45	0.0354936	0.78597	0.863815	999608068	66374	0.000391932	6.63956e-05	0.000379217	6.37536e-05	0.000382097	6.43516e-05	0.000384374	6.48026e-05	0.000386246	6.51683e-05	0.681746
46	0.0354945	0.785964	0.861666	999529308	78760	0.000470692	7.87909e-05	0.00045469	7.54733e-05	0.000458333	7.62361e-05	0.000461172	7.67985e-05	0.000463495	7.72482e-05	0.686475
47	0.0354957	0.785957	0.861223	999436441	92867	0.000563559	9.29107e-05	0.000543455	8.87646e-05	0.000548069	8.9736e-05	0.000551607	9.04348e-05	0.00055448	9.09855e-05	0.687993
48	0.035497	0.785949	0.862658	999327511	108930	0.000672489	0.000108991	0.000647283	0.000103828	0.000653132	0.000105063	0.000657536	0.00010593	0.000661084	0.000106604	0.686975
49	0.0354986	0.78594	0.861395	999199613	127898	0.000800387	0.000127984	0.000768816	0.000121534	0.000776245	0.000123113	0.000781729	0.000124193	0.000786106	0.000125022	0.687655
50	0.0355004	0.785929	0.862713	999049818	149795	0.000950182	0.000149915	0.000910678	0.000141862	0.000920127	0.000143881	0.00092696	0.000145231	0.000932354	0.000146249	0.687626
51	0.0355026	0.785916	0.862614	998874228	175590	0.00112577	0.000175757	0.00107635	0.000165675	0.00108839	0.000168263	0.00109692	0.000169963	0.00110357	0.000171217	0.689203
52	0.0355051	0.785902	0.861722	998669335	204893	0.00133066	0.000205124	0.00126889	0.000192535	0.00128423	0.000195842	0.00129491	0.000197985	0.0013031	0.000199527	0.688706
53	0.0355081	0.785884	0.862331	998430270	239065	0.00156973	0.000239384	0.00149253	0.000223643	0.0015121	0.000227867	0.00152549	0.000230578	0.00153558	0.00023248	0.689269
54	0.0355115	0.785864	0.861651	998151921	278349	0.00184808	0.000278787	0.00175165	0.000259123	0.0017766	0.000264498	0.00179342	0.000267936	0.00180586	0.000270285	0.689584
55	0.0355154	0.785841	0.861546	997829246	322675	0.00217075	0.000323272	0.00205045	0.000298792	0.00208218	0.000305586	0.00210336	0.000309936	0.00211871	0.000312843	0.688202
56	0.03552	0.785813	0.86148	997454129	375117	0.00254587	0.000375933	0.0023958	0.00034535	0.00243612	0.000353936	0.00246282	0.000359463	0.0024818	0.000363096	0.690208
57	0.0355254	0.785782	0.86185	997020228	433901	0.00297977	0.000435008	0.00279277	0.000396972	0.00284385	0.00040773	0.00287755	0.000414733	0.00290107	0.000419272	0.69036
58	0.0355315	0.785746	0.861474	996520455	499773	0.00347955	0.000501267	0.00324691	0.000454139	0.00331138	0.000467533	0.00335392	0.000476364	0.00338311	0.000482031	0.689365
59	0.0355386	0.785704	0.861366	995946013	574442	0.00405399	0.000576448	0.00376508	0.000518173	0.00384615	0.000534765	0.00389978	0.000545858	0.00393606	0.000552952	0.688906
60	0.0355467	0.785656	0.862052	995285489	660524	0.00471451	0.000663213	0.00435624	0.000591162	0.00445778	0.000611635	0.00452532	0.000625543	0.0045705	0.000634447	0.690916
61	0.0355561	0.7856	0.862031	994531695	753794	0.0054683	0.000757365	0.00502524	0.000668996	0.00515176	0.000693977	0.00523655	0.000711231	0.00529284	0.000722338	0.690158
62	0.0355668	0.785537	0.861891	993672576	859119	0.00632742	0.000863843	0.00578089	0.000755651	0.00593776	0.000785999	0.00604385	0.000807301	0.00611401	0.000821167	0.691201
63	0.0355789	0.785466	0.861493	992699572	973004	0.00730043	0.0009792	0.00662848	0.000847594	0.00682192	0.000884159	0.00695409	0.000910236	0.00704144	0.000927428	0.690851
64	0.0355925	0.785385	0.861915	991600357	1099215	0.00839964	0.0011073	0.00757616	0.000947677	0.00781346	0.000991541	0.00797738	0.00102329	0.00808596	0.00104452	0.691993
65	0.0356078	0.785295	0.861321	990365404	1234953	0.0096346	0.00124541	0.00862912	0.00105296	0.00891873	0.00110527	0.00912093	0.00114355	0.00925551	0.00116955	0.692815
66	0.035625	0.785193	0.861794	988988412	1376992	0.0110116	0.00139039	0.00978934	0.00116021	0.0101408	0.00122209	0.0103886	0.00126772	0.0105547	0.00129924	0.692156
67	0.0356441	0.78508	0.861575	987455698	1532714	0.0125443	0.00154978	0.0110643	0.00127501	0.0114889	0.00134812	0.0117909	0.00140226	0.011995	0.00144027	0.694291
68	0.0356652	0.784955	0.861459	985765217	1690481	0.0142348	0.00171196	0.0124513	0.00138696	0.0129615	0.00147259	0.013327	0.00153612	0.0135764	0.00158143	0.694273
69	0.0356885	0.784818	0.861404	983909480	1855737	0.0160905	0.00188253	0.0139512	0.00149992	0.0145614	0.00159991	0.015001	0.00167396	0.015304	0.00172756	0.695355
70	0.0357138	0.784667	0.86152	981888960	2020520	0.018111	0.00205356	0.015558	0.00160674	0.0162842	0.00172277	0.0168093	0.00180835	0.017175	0.00187097	0.69523
71	0.0357414	0.784504	0.861058	979697502	2191458	0.0203025	0.00223188	0.01727	0.00171202	0.0181307	0.00184646	0.0187543	0.00194493	0.0191925	0.00201755	0.696973
72	0.0357713	0.784327	0.861314	977338615	2358887	0.0226614	0.00240777	0.0190773	0.00180732	0.0200929	0.00196228	0.0208291	0.00207479	0.0213507	0.00215812	0.698001
73	0.0358032	0.784138	0.860817	974815470	2523145	0.0251845	0.00258165	0.0209696	0.0018923	0.0221631	0.00207013	0.023027	0.00219794	0.0236434	0.00229276	0.699153
74	0.0358373	0.783936	0.86098	972135226	2680244	0.0278648	0.00274949	0.0229332	0.00196356	0.0243294	0.00216633	0.0253377	0.00231075	0.0260611	0.0024177	0.699899
75	0.0358735	0.783722	0.860822	969304370	2830856	0.0306956	0.002912	0.0249546	0.00202142	0.0265805	0.00225112	0.0277514	0.00241369	0.0285947	0.00253359	0.700911
76	0.0359115	0.783497	0.86054	966330896	2973474	0.0336691	0.00306764	0.0270192	0.0020646	0.0289035	0.00232295	0.0302568	0.00250536	0.0312337	0.00263897	0.702137
77	0.0359514	0.78326	0.860421	963223792	3107104	0.0367762	0.00321536	0.0291111	0.00209197	0.0312841	0.00238059	0.0328415	0.00258469	0.0339666	0.0027329	0.703578
78	0.0359929	0.783013	0.859994	959989602	3234190	0.0400104	0.00335767	0.0312159	0.00210473	0.0337096	0.00242556	0.035495	0.00265351	0.0367839	0.00281734	0.705904
79	0.036036	0.782757	0.859834	956645950	3343652	0.043354	0.00348301	0.0333115	0.00209567	0.0361592	0.00244958	0.0381975	0.00270254	0.0396666	0.0028827	0.706777
80	0.0360807	0.782492	0.859735	953201537	3444413	0.0467985	0.00360051	0.0353824	0.00207088	0.0386187	0.00245953	0.0409366	0.00273903	0.0426034	0.00293683	0.708173
81	0.0361267	0.782218	0.85969	949669771	3531766	0.0503302	0.00370516	0.0374103	0.00202785	0.041071	0.00245225	0.0436957	0.0027591	0.0455792	0.00297576	0.709066
82	0.036174	0.781937	0.859408	946058622	3611149	0.0539414	0.00380253	0.0393801	0.00196986	0.0435023	0.00243133	0.0464624	0.00276677	0.0485832	0.00300399	0.710474
83	0.0362225	0.781649	0.859169	942374564	3684058	0.0576254	0.00389411	0.0412781	0.00189793	0.0458998	0.00239749	0.0492254	0.00276295	0.0516058	0.0030226	0.712549
84	0.0362719	0.781355	0.859072	938628612	3745952	0.0613714	0.00397501	0.0430888	0.00181068	0.0482476	0.00234781	0.0519697	0.0027443	0.0546335	0.0030277	0.714269
85	0.0363225	0.781054	0.859094	934831108	3797504	0.0651689	0.0040458	0.0447988	0.00171004	0.0505308	0.00228317	0.0546814	0.00271166	0.0576533	0.00301981	0.715638
86	0.0363737	0.780749	0.858688	930990903	3840205	0.0690091	0.00410791	0.0463971	0.00159825	0.0527357	0.00220495	0.0573478	0.00266641	0.0606534	0.00300006	0.716801
87	0.0364257	0.780438	0.858567	927111682	3879221	0.0728883	0.00416677	0.0478759	0.00147889	0.0548518	0.0021161	0.0599596	0.00261182	0.0636255	0.00297216	0.718576
88	0.0364785	0.780124	0.858255	923199957	3911725	0.0768	0.00421926	0.0492281	0.00135217	0.0568671	0.00201522	0.0625052	0.00254565	0.0665592	0.0029337	0.720297
89	0.0365317	0.779806	0.858022	919264708	3935249	0.0807353	0.00426262	0.0504472	0.00121912	0.0587692	0.00190218	0.0649717	0.00246646	0.0694422	0.00288298	0.721385
90	0.0365856	0.779484	0.857906	915303284	3961424	0.0846967	0.00430934	0.0515327	0.00108545	0.0605531	0.00178385	0.0673534	0.00238173	0.0722709	0.00282871	0.723851
91	0.03664	0.77916	0.857554	911326502	3976782	0.0886735	0.00434477	0.0524823	0.000949596	0.0622082	0.0016551	0.0696368	0.00228337	0.0750322	0.00276124	0.725125
92	0.0366947	0.778832	0.857408	907340871	3985631	0.0926591	0.00437344	0.0532981	0.000815839	0.0637276	0.00151946	0.0718109	0.00217414	0.0777156	0.00268347	0.725898
93	0.0367501	0.778502	0.857296	903345615	3995256	0.0966544	0.00440326	0.0539866	0.000688463	0.0651087	0.00138104	0.0738692	0.00205826	0.0803156	0.00260001	0.727403
94	0.0368056	0.778169	0.856936	899338575	4007040	0.100661	0.00443578	0.0545564	0.000569841	0.06635	0.00124136	0.0758061	0.00193688	0.0828271	0.00251145	0.729818
95	0.0368615	0.777834	0.856756	895330002	4008573	0.10467	0.00445725	0.0550169	0.000460445	0.0674484	0.00109837	0.0776112	0.00180508	0.0852372	0.00241007	0.730817
96	0.0369179	0.777496	0.856672	891317598	4012404	0.108682	0.00448148	0.0553805	0.000363684	0.0684065	0.000958102	0.0792811	0.00166992	0.087541	0.00230382	0.73262
97	0.0369742	0.777157	0.85604	887305620	4011978	0.112694	0.00450118	0.0556607	0.000280197	0.0692278	0.000821232	0.0808106	0.00152951	0.0897295	0.00218851	0.733981
98	0.0370311	0.776815	0.856192	883288772	4016848	0.116711	0.00452702	0.0558718	0.000211045	0.0699199	0.000692183	0.0821991	0.0013885	0.0917989	0.00206938	0.736601
99	0.0370882	0.776472	0.855677	879275141	4013631	0.120725	0.00454396	0.0560267	0.000154906	0.0704907	0.000570778	0.0834425	0.0012434	0.0937389	0.00194007	0.737995
100	0.0371456	0.776128	0.855492	875268362	4006779	0.124732	0.00455691	0.0561377	0.000111048	0.070951	0.000460239	0.0845404	0.00109788	0.0955432	0.00180427	0.738933
101	0.0372033	0.775781	0.855525	871264473	4003889	0.128736	0.00457447	0.0562157	7.79557e-05	0.0713139	0.000362912	0.0854964	0.000956069	0.0972096	0.00166638	0.740782
102	0.0372612	0.775432	0.855187	867266306	3998167	0.132734	0.00458892	0.0562691	5.34355e-05	0.0715931	0.000279232	0.0863148	0.000818405	0.0987338	0.00152424	0.74227
103	0.0373192	0.775083	0.854709	863273290	3993016	0.136727	0.00460414	0.0563048	3.56976e-05	0.0718029	0.000209793	0.0870029	0.000688077	0.100114	0.00138027	0.744002
104	0.0373775	0.774732	0.854684	859289563	3983727	0.14071	0.00461468	0.056328	2.31654e-05	0.0719566	0.000153752	0.0875694	0.000566526	0.101348	0.00123414	0.745081
105	0.0374359	0.77438	0.854367	855312596	3976967	0.144687	0.0046282	0.0563426	1.45955e-05	0.0720669	0.000110222	0.0880263	0.000456814	0.102438	0.00108971	0.746733
106	0.0374946	0.774026	0.854077	851343863	3968733	0.148656	0.0046401	0.0563515	8.88996e-06	0.0721441	7.72712e-05	0.088386	0.000359726	0.103386	0.000947674	0.748196
107	0.0375533	0.773671	0.853774	847382382	3961481	0.152618	0.00465321	0.0563567	5.20935e-06	0.0721971	5.29452e-05	0.0886627	0.00027667	0.104197	0.000810895	0.749921
108	0.0376125	0.773314	0.853797	843429880	3952502	0.15657	0.00466437	0.0563596	2.94461e-06	0.0722324	3.53354e-05	0.0888703	0.000207664	0.104878	0.000681095	0.751387
109	0.0376715	0.772957	0.85314	839487817	3942063	0.160512	0.00467385	0.0563612	1.57683e-06	0.0722553	2.29231e-05	0.0890225	0.000152144	0.105438	0.000560601	0.75263
110	0.0377308	0.772599	0.853001	835554608	3933209	0.164445	0.00468525	0.056362	8.06308e-07	0.0722698	1.44349e-05	0.0891315	0.000109009	0.10589	0.000451788	0.754223
111	0.0377905	0.772238	0.853072	831630722	3923886	0.168369	0.00469615	0.0563624	3.92389e-07	0.0722786	8.7895e-06	0.0892079	7.63981e-05	0.106246	0.000355661	0.75577
112	0.0378501	0.771877	0.852571	827717057	3913665	0.172283	0.00470601	0.0563626	1.76115e-07	0.0722837	5.14647e-06	0.0892602	5.23061e-05	0.106519	0.00027333	0.757181
113	0.03791	0.771514	0.8523	823811831	3905226	0.176188	0.00471807	0.0563627	7.81045e-08	0.0722866	2.90939e-06	0.0892951	3.49127e-05	0.106724	0.000205181	0.758969
114	0.0379702	0.771149	0.85217	819914079	3897752	0.180086	0.00473136	0.0563627	1.94888e-08	0.0722882	1.5591e-06	0.0893178	2.26654e-05	0.106875	0.000150434	0.760978
115	0.0380305	0.770783	0.851984	816026844	3887235	0.183973	0.00474103	0.0563627	0	0.072289	7.96883e-07	0.089332	1.42662e-05	0.106982	0.000107735	0.762422
116	0.0380911	0.770415	0.85193	812152044	3874800	0.187848	0.00474837	0.0563627	0	0.0722894	3.8748e-07	0.0893407	8.67955e-06	0.107058	7.54424e-05	0.763509
117	0.0381516	0.770047	0.851432	808288742	3863302	0.191711	0.00475687	0.0563627	0	0.0722895	1.73849e-07	0.0893458	5.08024e-06	0.107109	5.1633e-05	0.764794
118	0.0382124	0.769678	0.851153	804434076	3854666	0.195566	0.00476892	0.0563627	0	0.0722896	7.70933e-08	0.0893487	2.87173e-06	0.107144	3.44607e-05	0.766663
119	0.0382731	0.769308	0.850784	800591570	3842506	0.199408	0.00477666	0.0563627	0	0.0722896	1.92125e-08	0.0893502	1.537e-06	0.107166	2.23442e-05	0.767848
120	0.0383342	0.768935	0.850793	796757345	3834225	0.203243	0.00478924	0.0563627	0	0.0722896	0	0.089351	7.86016e-07	0.10718	1.40716e-05	0.76982
