# Supplementary material for: Quantifying the Potential for Future Gene Therapy to Lower Lifetime Risk of Polygenic Late-Onset Diseases
Source: MDPI journal article supplement (doi:10.3390/ijms20133352), 2019-07-08
Supplement: s2 [file s2 › SuppFiles/Results/LODsCommonLow/LungCancer/-1.000/IndividualsByBetaDistrib.csv]

nEntry	Beta	nDetrimentalCount	nFractionPopulation	nCumulativeFractionPopulation	nEditsNeeded	nIndividuals
0	-19.8	0	0	1	0	0
1	-19.6	0	0	1	0	0
2	-19.4	0	0	1	0	0
3	-19.2	0	0	1	0	0
4	-19	0	0	1	0	0
5	-18.8	0	0	1	0	0
6	-18.6	0	0	1	0	0
7	-18.4	0	0	1	0	0
8	-18.2	0	0	1	0	0
9	-18	0	0	1	0	0
10	-17.8	0	0	1	0	0
11	-17.6	0	0	1	0	0
12	-17.4	0	0	1	0	0
13	-17.2	0	0	1	0	0
14	-17	0	0	1	0	0
15	-16.8	0	0	1	0	0
16	-16.6	0	0	1	0	0
17	-16.4	0	0	1	0	0
18	-16.2	0	0	1	0	0
19	-16	0	0	1	0	0
20	-15.8	0	0	1	0	0
21	-15.6	0	0	1	0	0
22	-15.4	0	0	1	0	0
23	-15.2	0	0	1	0	0
24	-15	0	0	1	0	0
25	-14.8	0	0	1	0	0
26	-14.6	0	0	1	0	0
27	-14.4	0	0	1	0	0
28	-14.2	0	0	1	0	0
29	-14	0	0	1	0	0
30	-13.8	0	0	1	0	0
31	-13.6	0	0	1	0	0
32	-13.4	0	0	1	0	0
33	-13.2	0	0	1	0	0
34	-13	0	0	1	0	0
35	-12.8	0	0	1	0	0
36	-12.6	0	0	1	0	0
37	-12.4	0	0	1	0	0
38	-12.2	0	0	1	0	0
39	-12	0	0	1	0	0
40	-11.8	0	0	1	0	0
41	-11.6	0	0	1	0	0
42	-11.4	0	0	1	0	0
43	-11.2	0	0	1	0	0
44	-11	0	0	1	0	0
45	-10.8	0	0	1	0	0
46	-10.6	0	0	1	0	0
47	-10.4	0	0	1	0	0
48	-10.2	0	0	1	0	0
49	-10	0	0	1	0	0
50	-9.8	0	0	1	0	0
51	-9.6	0	0	1	0	0
52	-9.4	0	0	1	0	0
53	-9.2	0	0	1	0	0
54	-9	0	0	1	0	0
55	-8.8	0	0	1	0	0
56	-8.6	0	0	1	0	0
57	-8.4	0	0	1	0	0
58	-8.2	0	0	1	0	0
59	-8	0	0	1	0	0
60	-7.8	0	0	1	0	0
61	-7.6	0	0	1	0	0
62	-7.4	0	0	1	0	0
63	-7.2	0	0	1	0	0
64	-7	0	0	1	0	0
65	-6.8	0	0	1	0	0
66	-6.6	0	0	1	0	0
67	-6.4	0	0	1	0	0
68	-6.2	0	0	1	0	0
69	-6	0	0	1	0	0
70	-5.8	0	0	1	0	0
71	-5.6	0	0	1	0	0
72	-5.4	0	0	1	0	0
73	-5.2	0	0	1	0	0
74	-5	0	0	1	0	0
75	-4.8	0	0	1	0	0
76	-4.6	0	0	1	0	0
77	-4.4	0	0	1	0	0
78	-4.2	0	0	1	0	0
79	-4	0	0	1	0	0
80	-3.8	0	0	1	0	0
81	-3.6	0	0	1	0	0
82	-3.4	25.833	6e-09	1	0	6
83	-3.2	28.206	3.4e-08	0.99999999	0	34
84	-3	29.652	3.42e-07	0.99999996	0	342
85	-2.8	31.464	2.171e-06	0.99999962	0	2171
86	-2.6	33.604	1.1817e-05	0.99999745	0	11817
87	-2.4	35.41	5.4421e-05	0.99998563	0	54421
88	-2.2	37.44	0.000218291	0.99993121	0	218291
89	-2	39.291	0.000734756	0.99971292	0	734756
90	-1.8	41.259	0.002212371	0.99897816	0	2212371
91	-1.6	43.126	0.005586565	0.99676579	0	5586565
92	-1.4	45.053	0.012854091	0.99117923	0	12854091
93	-1.2	46.937	0.025060342	0.97832513	0	25060342
94	-1	48.828	0.044738695	0.95326479	0	44738695
95	-0.8	50.725	0.068500326	0.9085261	0	68500326
96	-0.6	52.587	0.096197274	0.84002577	0	96197274
97	-0.4	54.495	0.11723771	0.7438285	0	117237706
98	-0.2	56.335	0.13091622	0.62659079	0	130916220
99	0	58.25	0.12847153	0.49567457	0	128471530
100	0.2	60.076	0.11520029	0.36720304	1.8259	115200289
101	0.4	61.993	0.091740149	0.25200275	3.7434	91740149
102	0.6	63.811	0.066510433	0.1602626	5.5613	66510433
103	0.8	65.728	0.043280584	0.093752171	7.478	43280584
104	1	67.543	0.025550999	0.050471587	9.293	25550999
105	1.2	69.458	0.013658406	0.024920588	11.208	13658406
106	1.4	71.273	0.006593039	0.011262182	13.023	6593039
107	1.6	73.184	0.002903071	0.004669143	14.934	2903071
108	1.8	75.006	0.001152086	0.001766072	16.756	1152086
109	2	76.905	0.000420615	0.000613986	18.656	420615
110	2.2	78.738	0.000137087	0.000193371	20.488	137087
111	2.4	80.633	4.1469e-05	5.6284e-05	22.383	41469
112	2.6	82.473	1.1294e-05	1.4815e-05	24.224	11294
113	2.8	84.244	2.74e-06	3.521e-06	25.995	2740
114	3	86.186	6.22e-07	7.81e-07	27.937	622
115	3.2	87.976	1.26e-07	1.59e-07	29.727	126
116	3.4	90.345	2.9e-08	3.3e-08	32.095	29
117	3.6	92.667	3e-09	4e-09	34.417	3
118	3.8	95	1e-09	1e-09	36.75	1
119	4	0	0	0	0	0
120	4.2	0	0	0	0	0
121	4.4	0	0	0	0	0
122	4.6	0	0	0	0	0
123	4.8	0	0	0	0	0
124	5	0	0	0	0	0
125	5.2	0	0	0	0	0
126	5.4	0	0	0	0	0
127	5.6	0	0	0	0	0
128	5.8	0	0	0	0	0
129	6	0	0	0	0	0
130	6.2	0	0	0	0	0
131	6.4	0	0	0	0	0
132	6.6	0	0	0	0	0
133	6.8	0	0	0	0	0
134	7	0	0	0	0	0
135	7.2	0	0	0	0	0
136	7.4	0	0	0	0	0
137	7.6	0	0	0	0	0
138	7.8	0	0	0	0	0
139	8	0	0	0	0	0
140	8.2	0	0	0	0	0
141	8.4	0	0	0	0	0
142	8.6	0	0	0	0	0
143	8.8	0	0	0	0	0
144	9	0	0	0	0	0
145	9.2	0	0	0	0	0
146	9.4	0	0	0	0	0
147	9.6	0	0	0	0	0
148	9.8	0	0	0	0	0
149	10	0	0	0	0	0
150	10.2	0	0	0	0	0
151	10.4	0	0	0	0	0
152	10.6	0	0	0	0	0
153	10.8	0	0	0	0	0
154	11	0	0	0	0	0
155	11.2	0	0	0	0	0
156	11.4	0	0	0	0	0
157	11.6	0	0	0	0	0
158	11.8	0	0	0	0	0
159	12	0	0	0	0	0
160	12.2	0	0	0	0	0
161	12.4	0	0	0	0	0
162	12.6	0	0	0	0	0
163	12.8	0	0	0	0	0
164	13	0	0	0	0	0
165	13.2	0	0	0	0	0
166	13.4	0	0	0	0	0
167	13.6	0	0	0	0	0
168	13.8	0	0	0	0	0
169	14	0	0	0	0	0
170	14.2	0	0	0	0	0
171	14.4	0	0	0	0	0
172	14.6	0	0	0	0	0
173	14.8	0	0	0	0	0
174	15	0	0	0	0	0
175	15.2	0	0	0	0	0
176	15.4	0	0	0	0	0
177	15.6	0	0	0	0	0
178	15.8	0	0	0	0	0
179	16	0	0	0	0	0
180	16.2	0	0	0	0	0
181	16.4	0	0	0	0	0
182	16.6	0	0	0	0	0
183	16.8	0	0	0	0	0
184	17	0	0	0	0	0
185	17.2	0	0	0	0	0
186	17.4	0	0	0	0	0
187	17.6	0	0	0	0	0
188	17.8	0	0	0	0	0
189	18	0	0	0	0	0
190	18.2	0	0	0	0	0
191	18.4	0	0	0	0	0
192	18.6	0	0	0	0	0
193	18.8	0	0	0	0	0
194	19	0	0	0	0	0
195	19.2	0	0	0	0	0
196	19.4	0	0	0	0	0
197	19.6	0	0	0	0	0
198	19.8	0	0	0	0	0
199	20	0	0	0	0	0
