# Supplementary material for: Quantifying the Potential for Future Gene Therapy to Lower Lifetime Risk of Polygenic Late-Onset Diseases
Source: MDPI journal article supplement (doi:10.3390/ijms20133352), 2019-07-08
Supplement: s2 [file s2 › SuppFiles/Results/LODsCommonLow/LungCancer/0.250/FrailtyAnalysis.csv]

Age	Heritability	MeanOR	CaseOR	nControls	nCases	nCumIncidence	nIncidence	nLifeIncidence0	nAbsIncidence0	nLifeIncidence5	nAbsIncidence5	nLifeIncidence10	nAbsIncidence10	nLifeIncidence15	nAbsIncidence15	nIncActDivExp
27	0.099613	0.249996	0.359067	999999778	222	2.22e-07	2.22e-07	2.18613e-07	2.18613e-07	2.19569e-07	2.19569e-07	2.20151e-07	2.20151e-07	2.20348e-07	2.20348e-07	0.256343
28	0.099613	0.249996	0.368407	999999301	477	6.99e-07	4.77e-07	6.87884e-07	4.6927e-07	6.90981e-07	4.71412e-07	6.93003e-07	4.72852e-07	6.93757e-07	4.73408e-07	0.253473
29	0.099613	0.249996	0.361099	999998524	777	1.476e-06	7.77001e-07	1.45154e-06	7.63659e-07	1.45823e-06	7.67245e-07	1.46291e-06	7.69902e-07	1.46482e-06	7.7106e-07	0.252838
30	0.0996129	0.249996	0.3538	999997379	1145	2.621e-06	1.145e-06	2.57574e-06	1.1242e-06	2.58784e-06	1.12962e-06	2.59685e-06	1.13395e-06	2.60087e-06	1.13606e-06	0.256152
31	0.0996129	0.249996	0.36097	999995888	1491	4.112e-06	1.491e-06	4.03812e-06	1.46238e-06	4.05747e-06	1.46963e-06	4.07255e-06	1.4757e-06	4.07989e-06	1.47902e-06	0.24411
32	0.0996128	0.249995	0.363492	999993900	1988	6.1e-06	1.98801e-06	5.98585e-06	1.94772e-06	6.01514e-06	1.95767e-06	6.03878e-06	1.96623e-06	6.05133e-06	1.97144e-06	0.247625
33	0.0996127	0.249995	0.36694	999991401	2499	8.599e-06	2.49902e-06	8.43148e-06	2.44563e-06	8.47365e-06	2.4585e-06	8.50851e-06	2.46972e-06	8.5286e-06	2.47727e-06	0.243105
34	0.0996126	0.249995	0.361696	999988209	3192	1.1791e-05	3.19203e-06	1.15517e-05	3.12021e-06	1.16108e-05	3.13719e-06	1.16604e-05	3.15192e-06	1.16914e-05	3.16284e-06	0.247089
35	0.0996124	0.249994	0.366045	999984180	4029	1.582e-05	4.02905e-06	1.54853e-05	3.93361e-06	1.55667e-05	3.95581e-06	1.56353e-05	3.97487e-06	1.56815e-05	3.9901e-06	0.251636
36	0.0996123	0.249994	0.364331	999979326	4854	2.0674e-05	4.85408e-06	2.02184e-05	4.73311e-06	2.03275e-05	4.76083e-06	2.04197e-05	4.78442e-06	2.04857e-05	4.8042e-06	0.247205
37	0.099612	0.249993	0.364633	999973506	5820	2.6494e-05	5.82012e-06	2.5886e-05	5.66757e-06	2.60296e-05	5.70209e-06	2.61509e-05	5.73122e-06	2.6242e-05	5.75627e-06	0.2437
38	0.0996118	0.249993	0.360262	999966250	7256	3.375e-05	7.25619e-06	3.29421e-05	7.05613e-06	3.31306e-05	7.10105e-06	3.32894e-05	7.13842e-06	3.3413e-05	7.171e-06	0.251458
39	0.0996114	0.249992	0.361449	999957506	8744	4.2494e-05	8.7443e-06	4.14328e-05	8.49069e-06	4.1678e-05	8.54735e-06	4.18832e-05	8.59387e-06	4.20472e-05	8.63422e-06	0.252131
40	0.0996111	0.249991	0.360889	999947177	10329	5.2823e-05	1.03294e-05	5.14471e-05	1.00143e-05	5.17624e-05	1.00845e-05	5.20246e-05	1.01414e-05	5.22375e-05	1.01902e-05	0.248896
41	0.0996106	0.24999	0.360364	999934790	12387	6.521e-05	1.23877e-05	6.34371e-05	1.19901e-05	6.38409e-05	1.20785e-05	6.41738e-05	1.21492e-05	6.44469e-05	1.22094e-05	0.250347
42	0.0996101	0.249989	0.363722	999920083	14707	7.9917e-05	1.4708e-05	7.76483e-05	1.42112e-05	7.81627e-05	1.43218e-05	7.85829e-05	1.4409e-05	7.89295e-05	1.44826e-05	0.250058
43	0.0996094	0.249987	0.364408	999902639	17444	9.7361e-05	1.74454e-05	9.4473e-05	1.68247e-05	9.51263e-05	1.69635e-05	9.56543e-05	1.70715e-05	9.60909e-05	1.71613e-05	0.250167
44	0.0996086	0.249985	0.363405	999881831	20808	0.000118169	2.081e-05	0.000114503	2.00296e-05	0.000115331	2.02052e-05	0.000115994	2.034e-05	0.000116542	2.04507e-05	0.252267
45	0.0996077	0.249983	0.35987	999857675	24156	0.000142325	2.41589e-05	0.000137705	2.32023e-05	0.000138751	2.342e-05	0.000139578	2.35841e-05	0.000140259	2.37172e-05	0.248062
46	0.0996067	0.24998	0.358896	999828824	28851	0.000171176	2.88551e-05	0.000165352	2.7647e-05	0.000166678	2.79265e-05	0.000167711	2.81325e-05	0.000168556	2.82972e-05	0.251403
47	0.0996055	0.249977	0.361226	999794894	33930	0.000205106	3.39358e-05	0.000197783	3.24311e-05	0.000199464	3.27861e-05	0.000200752	3.30414e-05	0.000201799	3.32426e-05	0.251291
48	0.099604	0.249973	0.364003	999754772	40122	0.000245228	4.01302e-05	0.000236026	3.82427e-05	0.000238162	3.86977e-05	0.000239769	3.90168e-05	0.000241064	3.92652e-05	0.252942
49	0.0996023	0.249969	0.362446	999708647	46125	0.000291353	4.61363e-05	0.000279856	4.38298e-05	0.000282561	4.43995e-05	0.000284558	4.47888e-05	0.000286151	4.50876e-05	0.247889
50	0.0996003	0.249964	0.361897	999653799	54848	0.000346201	5.4864e-05	0.000331799	5.19432e-05	0.000335244	5.26826e-05	0.000337735	5.31768e-05	0.000339701	5.35495e-05	0.251649
51	0.0995979	0.249958	0.36173	999589791	64008	0.000410209	6.40302e-05	0.000392193	6.03938e-05	0.000396581	6.13369e-05	0.000399692	6.19569e-05	0.000402115	6.24139e-05	0.251084
52	0.0995952	0.249951	0.361917	999515028	74763	0.000484972	7.47937e-05	0.000462446	7.02537e-05	0.000468041	7.14603e-05	0.000471934	7.22424e-05	0.00047492	7.2805e-05	0.251121
53	0.0995919	0.249943	0.362214	999427945	87083	0.000572055	8.71253e-05	0.000543912	8.14653e-05	0.000551045	8.3004e-05	0.000555925	8.39916e-05	0.000559604	8.46843e-05	0.250864
54	0.0995881	0.249934	0.363043	999327073	100872	0.000672927	0.00010093	0.000637816	9.39048e-05	0.000646898	9.58526e-05	0.000653024	9.70984e-05	0.000657554	9.79497e-05	0.249652
55	0.0995838	0.249923	0.362691	999209575	117498	0.000790425	0.000117577	0.000746618	0.000108801	0.000758173	0.000111275	0.000765883	0.000112859	0.000771472	0.000113918	0.250305
56	0.0995788	0.24991	0.361176	999073466	136109	0.000926534	0.000136217	0.000871926	0.000125308	0.000886597	0.000128424	0.000896312	0.000130429	0.000903219	0.000131747	0.250092
57	0.099573	0.249895	0.362138	998915453	158013	0.00108455	0.00015816	0.00101649	0.000144565	0.00103508	0.000148482	0.00104734	0.000151033	0.0010559	0.000152686	0.251
58	0.0995663	0.249879	0.361473	998733761	181692	0.00126624	0.000181889	0.00118159	0.000165102	0.00120505	0.000169971	0.00122053	0.000173182	0.00123115	0.000175242	0.250142
59	0.0995584	0.249859	0.362014	998524050	209711	0.00147595	0.000209977	0.00137076	0.000189169	0.00140028	0.000195226	0.0014198	0.000199276	0.00143301	0.000201866	0.250941
60	0.0995495	0.249837	0.361925	998283186	240864	0.00171681	0.00024122	0.00158633	0.000215571	0.00162331	0.000223036	0.00164791	0.000228108	0.00166437	0.000231355	0.251296
61	0.0995393	0.249811	0.362287	998008711	274475	0.00199129	0.000274947	0.00182993	0.000243598	0.00187601	0.000252694	0.00190689	0.000258977	0.00192739	0.000263021	0.250549
62	0.0995279	0.249783	0.360873	997695933	312778	0.00230407	0.000313402	0.00210504	0.000275109	0.00216216	0.000286157	0.0022008	0.000293913	0.00222635	0.000298961	0.250768
63	0.0995146	0.24975	0.361834	997340491	355442	0.00265951	0.000356263	0.00241467	0.000309629	0.00248515	0.000322987	0.00253331	0.000332512	0.00256514	0.000338793	0.251353
64	0.0994998	0.249712	0.36129	996938720	401771	0.00306128	0.000402842	0.00276105	0.000346383	0.00284757	0.000362416	0.00290733	0.000374021	0.00294692	0.000381779	0.251751
65	0.0994832	0.249671	0.361359	996487264	451456	0.00351274	0.000452842	0.00314598	0.000384927	0.00325161	0.000404049	0.00332537	0.000418041	0.00337447	0.000427547	0.251913
66	0.0994647	0.249624	0.361126	995982101	505163	0.0040179	0.000506944	0.00357161	0.000425635	0.00369995	0.000448335	0.00379045	0.000465076	0.00385111	0.000476639	0.252364
67	0.0994443	0.249572	0.361008	995421387	560714	0.00457861	0.000562976	0.00403805	0.000466438	0.00419313	0.000493184	0.00430344	0.000512992	0.004378	0.000526895	0.25221
68	0.0994215	0.249515	0.360649	994801064	620323	0.00519894	0.000623176	0.004547	0.000508947	0.0047335	0.00054037	0.00486712	0.000563681	0.00495831	0.000580306	0.252725
69	0.0993965	0.249452	0.360888	994121710	679354	0.00587829	0.000682904	0.00509609	0.000549095	0.0053192	0.000585698	0.00547993	0.000612808	0.00559074	0.000632431	0.252246
70	0.0993694	0.249383	0.36047	993379323	742387	0.00662068	0.000746777	0.00568645	0.000590354	0.00595219	0.000632985	0.00614436	0.000664429	0.00627818	0.000687439	0.25282
71	0.0993399	0.249309	0.360301	992574272	805051	0.00742573	0.000810417	0.00631537	0.000628926	0.0066305	0.000678312	0.00685885	0.000714487	0.00701934	0.000741166	0.253078
72	0.0993082	0.249228	0.360293	991705555	868717	0.00829444	0.000875216	0.00698096	0.000665589	0.00735315	0.000722655	0.00762294	0.000764093	0.00781412	0.00079478	0.253721
73	0.0992743	0.249142	0.359851	990774076	931479	0.00922592	0.00093927	0.00767955	0.000698586	0.00811739	0.000764237	0.00843436	0.000811421	0.00866055	0.000846426	0.25437
74	0.0992379	0.24905	0.359997	989781628	992448	0.0102184	0.00100169	0.00840662	0.000727072	0.00891955	0.000802156	0.00928999	0.000855629	0.00955578	0.000895233	0.254986
75	0.0991993	0.248953	0.359626	988731712	1049916	0.0112683	0.00106076	0.00915633	0.000749708	0.00975445	0.000834904	0.0101852	0.000895195	0.0104954	0.000939664	0.255321
76	0.0991588	0.248851	0.359775	987628744	1102968	0.0123713	0.00111554	0.00992216	0.000765835	0.0106161	0.000861666	0.0111145	0.000929328	0.0114743	0.00097889	0.25533
77	0.0991164	0.248744	0.359548	986475231	1153513	0.0135248	0.00116796	0.0106988	0.000776643	0.0114999	0.000883793	0.0120741	0.000959567	0.0124889	0.00101459	0.255571
78	0.0990724	0.248632	0.359124	985274585	1200646	0.0147254	0.00121711	0.0114802	0.00078135	0.0124004	0.000900454	0.0130592	0.000985076	0.0135348	0.00104589	0.25588
79	0.0990269	0.248517	0.358917	984029913	1244672	0.0159701	0.00126327	0.0122603	0.000780111	0.0133122	0.000911853	0.0140652	0.00100602	0.0146079	0.00107308	0.256346
80	0.0989802	0.248398	0.358235	982744502	1285411	0.0172555	0.00130627	0.0130331	0.000772828	0.0142301	0.000917867	0.0150873	0.00102217	0.0157039	0.00109599	0.256927
81	0.098932	0.248275	0.358374	981420828	1323674	0.0185792	0.00134692	0.0137931	0.000760021	0.0151492	0.00091908	0.0161214	0.00103409	0.0168192	0.00111529	0.257763
82	0.0988825	0.24815	0.358265	980065282	1355546	0.0199347	0.00138121	0.0145326	0.000739444	0.0160618	0.000912669	0.01716	0.00103859	0.0179468	0.00112763	0.258068
83	0.0988322	0.248021	0.357847	978682660	1382622	0.0213173	0.00141074	0.0152449	0.000712292	0.0169616	0.000899776	0.018197	0.00103693	0.0190812	0.00113438	0.25814
84	0.0987808	0.247891	0.357353	977272493	1410167	0.0227275	0.00144088	0.0159265	0.000681632	0.0178454	0.000883836	0.01923	0.0010331	0.020221	0.00113978	0.258912
85	0.0987286	0.247758	0.357222	975839119	1433374	0.0241609	0.00146671	0.0165719	0.000645455	0.0187072	0.000861787	0.0202536	0.00102352	0.0213608	0.00113983	0.259438
86	0.0986757	0.247623	0.356574	974386926	1452193	0.0256131	0.00148815	0.0171763	0.000604388	0.019541	0.000833813	0.0212619	0.00100832	0.0224953	0.00113449	0.259671
87	0.098622	0.247486	0.356917	972916810	1470116	0.0270832	0.00150876	0.0177368	0.00056046	0.020343	0.000801941	0.0222517	0.000989807	0.0236217	0.00112637	0.260192
88	0.0985676	0.247348	0.356512	971432058	1484752	0.0285679	0.00152608	0.01825	0.000513234	0.0211079	0.000764907	0.0232179	0.000966239	0.0247352	0.00111353	0.260527
89	0.0985132	0.247209	0.355852	969932394	1499664	0.0300676	0.00154377	0.0187146	0.000464588	0.0218328	0.000724893	0.0241579	0.000939929	0.0258338	0.00109866	0.261259
90	0.0984581	0.247069	0.355962	968421960	1510434	0.031578	0.00155726	0.0191285	0.000413866	0.0225129	0.000680156	0.025066	0.000908118	0.0269124	0.00107855	0.261576
91	0.0984028	0.246928	0.355203	966900617	1521343	0.0330994	0.00157095	0.0194917	0.000363274	0.0231461	0.000633168	0.0259395	0.000873517	0.0279687	0.00105633	0.262186
92	0.0983469	0.246786	0.355223	965372553	1528064	0.0346274	0.00158037	0.0198045	0.000312787	0.0237287	0.000582551	0.026773	0.000833551	0.0289975	0.00102882	0.262308
93	0.0982911	0.246643	0.354767	963834570	1537983	0.0361654	0.00159315	0.0200696	0.000265025	0.0242603	0.000531635	0.0275654	0.00079233	0.0299984	0.00100088	0.263183
94	0.098235	0.246499	0.354369	962290963	1543607	0.037709	0.00160153	0.0202891	0.000219516	0.0247385	0.000478202	0.0283115	0.000746133	0.0309659	0.000967471	0.263499
95	0.0981786	0.246355	0.354358	960741315	1549648	0.0392587	0.00161037	0.0204671	0.000178	0.0251631	0.000424611	0.0290093	0.000697814	0.0318976	0.000931695	0.26404
96	0.0981219	0.246211	0.353788	959187644	1553671	0.0408124	0.00161716	0.0206079	0.000140825	0.0255341	0.000370993	0.0296559	0.000646622	0.0327897	0.000892079	0.264369
97	0.0980661	0.246066	0.353292	957629845	1557799	0.0423702	0.00162408	0.0207167	0.000108797	0.025853	0.000318874	0.0302498	0.000593888	0.0336394	0.000849772	0.26483
98	0.0980095	0.24592	0.35346	956065738	1564107	0.0439343	0.00163331	0.0207989	8.21782e-05	0.0261225	0.000269527	0.0307905	0.000540665	0.0344452	0.000805789	0.26576
99	0.0979522	0.245774	0.353377	954499551	1566187	0.0455004	0.00163816	0.0208593	6.0447e-05	0.0263452	0.000222727	0.0312757	0.000485197	0.0352023	0.000757048	0.266057
100	0.0978951	0.245628	0.352886	952930052	1569499	0.0470699	0.00164432	0.0209028	4.34987e-05	0.0265255	0.000180281	0.0317057	0.000430051	0.035909	0.000706753	0.266636
101	0.0978378	0.245481	0.352677	951361468	1568584	0.0486385	0.00164606	0.0209334	3.05403e-05	0.0266677	0.000142176	0.0320803	0.000374554	0.0365619	0.000652829	0.266561
102	0.0977807	0.245335	0.352183	949789267	1572201	0.0502107	0.00165258	0.0209544	2.10125e-05	0.0267775	0.000109803	0.0324021	0.000321822	0.0371612	0.000599378	0.267309
103	0.0977232	0.245188	0.351922	948212539	1576728	0.0517875	0.00166008	0.0209685	1.40959e-05	0.0268603	8.28413e-05	0.0326738	0.000271702	0.0377063	0.000545028	0.268259
104	0.097666	0.245041	0.351383	946635791	1576748	0.0533642	0.00166286	0.0209776	9.16879e-06	0.0269212	6.08546e-05	0.0328981	0.000224229	0.0381947	0.000488469	0.268484
105	0.0976093	0.244894	0.350888	945062867	1572924	0.0549371	0.00166159	0.0209834	5.77263e-06	0.0269648	4.35936e-05	0.0330787	0.000180674	0.0386257	0.000430989	0.268088
106	0.0975518	0.244747	0.351238	943486126	1576741	0.0565139	0.0016684	0.0209869	3.5319e-06	0.0269955	3.06991e-05	0.0332216	0.000142916	0.0390022	0.000376502	0.269022
107	0.0974948	0.244599	0.350604	941908414	1577712	0.0580916	0.00167222	0.020989	2.07469e-06	0.0270166	2.10861e-05	0.0333318	0.000110187	0.0393252	0.00032295	0.269498
108	0.0974379	0.244452	0.350329	940328282	1580132	0.0596717	0.00167759	0.0209902	1.1772e-06	0.0270307	1.41264e-05	0.0334149	8.30201e-05	0.0395975	0.000272288	0.270244
109	0.0973808	0.244304	0.349896	938748174	1580108	0.0612518	0.00168038	0.0209908	6.32043e-07	0.0270399	9.18833e-06	0.0334758	6.09843e-05	0.0398222	0.000224707	0.270592
110	0.097324	0.244157	0.349548	937166286	1581888	0.0628337	0.0016851	0.0209912	3.24287e-07	0.0270457	5.80553e-06	0.0335197	4.3842e-05	0.0400039	0.000181704	0.271265
111	0.0972672	0.244009	0.349181	935585847	1580439	0.0644142	0.0016864	0.0209913	1.58044e-07	0.0270492	3.54018e-06	0.0335504	3.07711e-05	0.0401471	0.000143251	0.2714
112	0.0972097	0.243861	0.349239	934005540	1580307	0.0659945	0.00168911	0.0209914	7.11138e-08	0.0270513	2.0781e-06	0.0335716	2.11208e-05	0.0402575	0.000110369	0.271772
113	0.0971526	0.243713	0.348833	932423979	1581561	0.067576	0.00169331	0.0209914	3.16312e-08	0.0270525	1.17826e-06	0.0335857	1.41392e-05	0.0403406	8.30952e-05	0.272393
114	0.0970957	0.243565	0.348383	930843503	1580476	0.0691565	0.00169502	0.0209914	7.90238e-09	0.0270531	6.3219e-07	0.0335949	9.19047e-06	0.0404016	6.09985e-05	0.272622
115	0.0970382	0.243417	0.348428	929263582	1579921	0.0707364	0.0016973	0.0209914	0	0.0270534	3.23884e-07	0.0336007	5.79831e-06	0.0404454	4.37875e-05	0.272949
116	0.0969816	0.243269	0.347844	927682945	1580637	0.0723171	0.00170096	0.0209914	0	0.0270536	1.58064e-07	0.0336042	3.54063e-06	0.0404762	3.0775e-05	0.273503
117	0.0969245	0.243121	0.347601	926101596	1581349	0.0738984	0.00170462	0.0209914	0	0.0270537	7.11607e-08	0.0336063	2.07947e-06	0.0404973	2.11347e-05	0.274064
118	0.0968672	0.242973	0.347305	924520108	1581488	0.0754799	0.00170768	0.0209914	0	0.0270537	3.16298e-08	0.0336075	1.17821e-06	0.0405114	1.41385e-05	0.274531
119	0.0968102	0.242824	0.346879	922936162	1583946	0.0770638	0.00171326	0.0209914	0	0.0270537	7.91973e-09	0.0336081	6.33578e-07	0.0405206	9.21065e-06	0.275407
120	0.096753	0.242675	0.346721	921351545	1584617	0.0786485	0.00171693	0.0209914	0	0.0270537	0	0.0336085	3.24846e-07	0.0405265	5.81554e-06	0.275979
