# Supplementary material for: Quantifying the Potential for Future Gene Therapy to Lower Lifetime Risk of Polygenic Late-Onset Diseases
Source: MDPI journal article supplement (doi:10.3390/ijms20133352), 2019-07-08
Supplement: s2 [file s2 › SuppFiles/Results/LODsCommonLow/LungCancer/0.250/IndividualsByBetaDistrib.csv]

nEntry	Beta	nDetrimentalCount	nFractionPopulation	nCumulativeFractionPopulation	nEditsNeeded	nIndividuals
0	-19.8	0	0	1	0	0
1	-19.6	0	0	1	0	0
2	-19.4	0	0	1	0	0
3	-19.2	0	0	1	0	0
4	-19	0	0	1	0	0
5	-18.8	0	0	1	0	0
6	-18.6	0	0	1	0	0
7	-18.4	0	0	1	0	0
8	-18.2	0	0	1	0	0
9	-18	0	0	1	0	0
10	-17.8	0	0	1	0	0
11	-17.6	0	0	1	0	0
12	-17.4	0	0	1	0	0
13	-17.2	0	0	1	0	0
14	-17	0	0	1	0	0
15	-16.8	0	0	1	0	0
16	-16.6	0	0	1	0	0
17	-16.4	0	0	1	0	0
18	-16.2	0	0	1	0	0
19	-16	0	0	1	0	0
20	-15.8	0	0	1	0	0
21	-15.6	0	0	1	0	0
22	-15.4	0	0	1	0	0
23	-15.2	0	0	1	0	0
24	-15	0	0	1	0	0
25	-14.8	0	0	1	0	0
26	-14.6	0	0	1	0	0
27	-14.4	0	0	1	0	0
28	-14.2	0	0	1	0	0
29	-14	0	0	1	0	0
30	-13.8	0	0	1	0	0
31	-13.6	0	0	1	0	0
32	-13.4	0	0	1	0	0
33	-13.2	0	0	1	0	0
34	-13	0	0	1	0	0
35	-12.8	0	0	1	0	0
36	-12.6	0	0	1	0	0
37	-12.4	0	0	1	0	0
38	-12.2	0	0	1	0	0
39	-12	0	0	1	0	0
40	-11.8	0	0	1	0	0
41	-11.6	0	0	1	0	0
42	-11.4	0	0	1	0	0
43	-11.2	0	0	1	0	0
44	-11	0	0	1	0	0
45	-10.8	0	0	1	0	0
46	-10.6	0	0	1	0	0
47	-10.4	0	0	1	0	0
48	-10.2	0	0	1	0	0
49	-10	0	0	1	0	0
50	-9.8	0	0	1	0	0
51	-9.6	0	0	1	0	0
52	-9.4	0	0	1	0	0
53	-9.2	0	0	1	0	0
54	-9	0	0	1	0	0
55	-8.8	0	0	1	0	0
56	-8.6	0	0	1	0	0
57	-8.4	0	0	1	0	0
58	-8.2	0	0	1	0	0
59	-8	0	0	1	0	0
60	-7.8	0	0	1	0	0
61	-7.6	0	0	1	0	0
62	-7.4	0	0	1	0	0
63	-7.2	0	0	1	0	0
64	-7	0	0	1	0	0
65	-6.8	0	0	1	0	0
66	-6.6	0	0	1	0	0
67	-6.4	0	0	1	0	0
68	-6.2	0	0	1	0	0
69	-6	0	0	1	0	0
70	-5.8	0	0	1	0	0
71	-5.6	0	0	1	0	0
72	-5.4	0	0	1	0	0
73	-5.2	0	0	1	0	0
74	-5	0	0	1	0	0
75	-4.8	0	0	1	0	0
76	-4.6	0	0	1	0	0
77	-4.4	0	0	1	0	0
78	-4.2	0	0	1	0	0
79	-4	0	0	1	0	0
80	-3.8	0	0	1	0	0
81	-3.6	0	0	1	0	0
82	-3.4	26.833	6e-09	1	0	6
83	-3.2	28	4.5e-08	0.99999999	0	45
84	-3	29.615	3.14e-07	0.99999995	0	314
85	-2.8	31.507	2.152e-06	0.99999963	0	2152
86	-2.6	33.588	1.184e-05	0.99999748	0	11840
87	-2.4	35.437	5.3969e-05	0.99998564	0	53969
88	-2.2	37.442	0.000218816	0.99993167	0	218816
89	-2	39.29	0.000734861	0.99971286	0	734861
90	-1.8	41.258	0.00221186	0.998978	0	2211860
91	-1.6	43.127	0.005588518	0.99676614	0	5588518
92	-1.4	45.053	0.012862664	0.99117762	0	12862664
93	-1.2	46.938	0.025061233	0.97831495	0	25061233
94	-1	48.828	0.044738782	0.95325372	0	44738782
95	-0.8	50.725	0.068490722	0.90851494	0	68490722
96	-0.6	52.587	0.096212787	0.84002422	0	96212787
97	-0.4	54.495	0.11724536	0.74381143	0	117245356
98	-0.2	56.335	0.13092102	0.62656607	0	130921021
99	0	58.249	0.12845923	0.49564505	0	128459229
100	0.2	60.075	0.11520494	0.36718583	1.826	115204937
101	0.4	61.993	0.09171408	0.25198089	3.7435	91714080
102	0.6	63.811	0.066503641	0.16026681	5.5613	66503641
103	0.8	65.728	0.043288373	0.093763167	7.4784	43288373
104	1	67.542	0.025557208	0.050474794	9.2922	25557208
105	1.2	69.458	0.013653996	0.024917586	11.208	13653996
106	1.4	71.274	0.006590873	0.01126359	13.024	6590873
107	1.6	73.182	0.002907565	0.004672717	14.933	2907565
108	1.8	75.004	0.001152735	0.001765152	16.755	1152735
109	2	76.91	0.00041955	0.000612417	18.661	419550
110	2.2	78.742	0.000136824	0.000192867	20.493	136824
111	2.4	80.624	4.1452e-05	5.6043e-05	22.374	41452
112	2.6	82.485	1.1015e-05	1.4591e-05	24.235	11015
113	2.8	84.374	2.821e-06	3.576e-06	26.125	2821
114	3	86.295	5.84e-07	7.55e-07	28.045	584
115	3.2	88.28	1.5e-07	1.71e-07	30.031	150
116	3.4	90.471	1.7e-08	2.1e-08	32.221	17
117	3.6	90.5	4e-09	4e-09	32.251	4
118	3.8	0	0	0	0	0
119	4	0	0	0	0	0
120	4.2	0	0	0	0	0
121	4.4	0	0	0	0	0
122	4.6	0	0	0	0	0
123	4.8	0	0	0	0	0
124	5	0	0	0	0	0
125	5.2	0	0	0	0	0
126	5.4	0	0	0	0	0
127	5.6	0	0	0	0	0
128	5.8	0	0	0	0	0
129	6	0	0	0	0	0
130	6.2	0	0	0	0	0
131	6.4	0	0	0	0	0
132	6.6	0	0	0	0	0
133	6.8	0	0	0	0	0
134	7	0	0	0	0	0
135	7.2	0	0	0	0	0
136	7.4	0	0	0	0	0
137	7.6	0	0	0	0	0
138	7.8	0	0	0	0	0
139	8	0	0	0	0	0
140	8.2	0	0	0	0	0
141	8.4	0	0	0	0	0
142	8.6	0	0	0	0	0
143	8.8	0	0	0	0	0
144	9	0	0	0	0	0
145	9.2	0	0	0	0	0
146	9.4	0	0	0	0	0
147	9.6	0	0	0	0	0
148	9.8	0	0	0	0	0
149	10	0	0	0	0	0
150	10.2	0	0	0	0	0
151	10.4	0	0	0	0	0
152	10.6	0	0	0	0	0
153	10.8	0	0	0	0	0
154	11	0	0	0	0	0
155	11.2	0	0	0	0	0
156	11.4	0	0	0	0	0
157	11.6	0	0	0	0	0
158	11.8	0	0	0	0	0
159	12	0	0	0	0	0
160	12.2	0	0	0	0	0
161	12.4	0	0	0	0	0
162	12.6	0	0	0	0	0
163	12.8	0	0	0	0	0
164	13	0	0	0	0	0
165	13.2	0	0	0	0	0
166	13.4	0	0	0	0	0
167	13.6	0	0	0	0	0
168	13.8	0	0	0	0	0
169	14	0	0	0	0	0
170	14.2	0	0	0	0	0
171	14.4	0	0	0	0	0
172	14.6	0	0	0	0	0
173	14.8	0	0	0	0	0
174	15	0	0	0	0	0
175	15.2	0	0	0	0	0
176	15.4	0	0	0	0	0
177	15.6	0	0	0	0	0
178	15.8	0	0	0	0	0
179	16	0	0	0	0	0
180	16.2	0	0	0	0	0
181	16.4	0	0	0	0	0
182	16.6	0	0	0	0	0
183	16.8	0	0	0	0	0
184	17	0	0	0	0	0
185	17.2	0	0	0	0	0
186	17.4	0	0	0	0	0
187	17.6	0	0	0	0	0
188	17.8	0	0	0	0	0
189	18	0	0	0	0	0
190	18.2	0	0	0	0	0
191	18.4	0	0	0	0	0
192	18.6	0	0	0	0	0
193	18.8	0	0	0	0	0
194	19	0	0	0	0	0
195	19.2	0	0	0	0	0
196	19.4	0	0	0	0	0
197	19.6	0	0	0	0	0
198	19.8	0	0	0	0	0
199	20	0	0	0	0	0
