# Supplementary material for: Quantifying the Potential for Future Gene Therapy to Lower Lifetime Risk of Polygenic Late-Onset Diseases
Source: MDPI journal article supplement (doi:10.3390/ijms20133352), 2019-07-08
Supplement: s2 [file s2 › SuppFiles/Results/LODsCommonLow/LungCancer/1.000/FrailtyAnalysis.csv]

Age	Heritability	MeanOR	CaseOR	nControls	nCases	nCumIncidence	nIncidence	nLifeIncidence0	nAbsIncidence0	nLifeIncidence5	nAbsIncidence5	nLifeIncidence10	nAbsIncidence10	nLifeIncidence15	nAbsIncidence15	nIncActDivExp
27	0.0996127	0.999994	1.3896	999999116	884	8.84e-07	8.84e-07	8.70515e-07	8.70515e-07	8.7432e-07	8.7432e-07	8.76636e-07	8.76636e-07	8.77423e-07	8.77423e-07	1.02075
28	0.0996126	0.999993	1.4842	999997305	1811	2.695e-06	1.811e-06	2.65217e-06	1.78165e-06	2.6641e-06	1.78978e-06	2.67189e-06	1.79525e-06	2.67479e-06	1.79736e-06	0.96235
29	0.0996125	0.999992	1.45132	999994224	3081	5.776e-06	3.08101e-06	5.68027e-06	3.0281e-06	5.70642e-06	3.04232e-06	5.72474e-06	3.05286e-06	5.73223e-06	3.05745e-06	1.00257
30	0.0996123	0.999991	1.44325	999989731	4493	1.0269e-05	4.49303e-06	1.00917e-05	4.41138e-06	1.01391e-05	4.43264e-06	1.01744e-05	4.44962e-06	1.01901e-05	4.45791e-06	1.00515
31	0.0996121	0.999988	1.45357	999983711	6020	1.6289e-05	6.02006e-06	1.59961e-05	5.90445e-06	1.60728e-05	5.9337e-06	1.61326e-05	5.95823e-06	1.61618e-05	5.97163e-06	0.985615
32	0.0996118	0.999985	1.44464	999975610	8101	2.439e-05	8.10113e-06	2.3933e-05	7.93687e-06	2.40502e-05	7.97742e-06	2.41449e-05	8.01229e-06	2.41953e-05	8.03352e-06	1.00907
33	0.0996114	0.999981	1.45583	999965372	10238	3.4628e-05	1.02382e-05	3.39523e-05	1.00194e-05	3.41223e-05	1.00721e-05	3.4263e-05	1.01181e-05	3.43443e-05	1.0149e-05	0.99598
34	0.0996109	0.999977	1.45078	999952416	12956	4.7584e-05	1.29564e-05	4.6617e-05	1.26646e-05	4.68558e-05	1.27335e-05	4.70563e-05	1.27933e-05	4.71819e-05	1.28376e-05	1.00294
35	0.0996104	0.999971	1.45268	999936368	16048	6.3632e-05	1.60488e-05	6.2285e-05	1.56681e-05	6.26123e-05	1.57565e-05	6.28887e-05	1.58324e-05	6.3075e-05	1.58931e-05	1.00233
36	0.0996096	0.999963	1.45137	999916823	19545	8.3177e-05	1.95462e-05	8.13433e-05	1.90582e-05	8.17821e-05	1.91698e-05	8.21535e-05	1.92648e-05	8.24194e-05	1.93445e-05	0.995438
37	0.0996088	0.999955	1.44013	999892830	23993	0.00010717	2.3995e-05	0.000104708	2.33646e-05	0.000105289	2.35069e-05	0.00010578	2.3627e-05	0.00010615	2.37303e-05	1.00472
38	0.0996077	0.999944	1.45606	999863710	29120	0.00013629	2.91231e-05	0.000133026	2.83179e-05	0.000133787	2.84981e-05	0.000134429	2.86481e-05	0.000134929	2.87789e-05	1.00924
39	0.0996064	0.999931	1.4557	999829024	34686	0.000170976	3.46907e-05	0.000166707	3.36811e-05	0.000167693	3.39059e-05	0.000168519	3.40904e-05	0.000169179	3.42505e-05	1.00027
40	0.0996048	0.999915	1.44559	999787483	41541	0.000212517	4.15481e-05	0.000206982	4.02752e-05	0.000208251	4.05575e-05	0.000209305	4.07864e-05	0.000210162	4.09829e-05	1.00113
41	0.099603	0.999897	1.44473	999738362	49121	0.000261638	4.91314e-05	0.000254529	4.75469e-05	0.000256148	4.78976e-05	0.000257484	4.81781e-05	0.000258579	4.84169e-05	0.992916
42	0.0996008	0.999875	1.45867	999679731	58631	0.000320269	5.86463e-05	0.000311183	5.66543e-05	0.000313244	5.70955e-05	0.000314927	5.74431e-05	0.000316315	5.77366e-05	0.997077
43	0.0995982	0.999849	1.44739	999610399	69332	0.000389601	6.93542e-05	0.000378054	6.68707e-05	0.000380666	6.74223e-05	0.000382778	6.78514e-05	0.000384524	6.82085e-05	0.994541
44	0.0995952	0.999819	1.44677	999527899	82500	0.000472101	8.25322e-05	0.000457468	7.94137e-05	0.000460776	8.011e-05	0.000463423	8.06446e-05	0.000465607	8.10835e-05	1.00049
45	0.0995915	0.999783	1.44841	999430728	97171	0.000569272	9.72169e-05	0.000550802	9.33347e-05	0.000554986	9.42102e-05	0.000558293	9.48705e-05	0.000561013	9.54059e-05	0.998218
46	0.0995873	0.99974	1.44893	999316060	114668	0.00068394	0.000114733	0.000660685	0.000109883	0.00066598	0.000110993	0.000670105	0.000111812	0.00067348	0.000112467	0.999627
47	0.0995822	0.99969	1.45288	999181247	134813	0.000818753	0.000134905	0.000789543	0.000128858	0.000796247	0.000130268	0.000801388	0.000131282	0.000805562	0.000132082	0.998958
48	0.0995764	0.999631	1.44637	999022543	158704	0.000977457	0.000158834	0.000940813	0.00015127	0.000949317	0.00015307	0.00095572	0.000154332	0.000960877	0.000155315	1.00113
49	0.0995695	0.999562	1.44766	998836323	186220	0.00116368	0.000186402	0.00111777	0.000176954	0.00112857	0.000179254	0.00113655	0.000180825	0.00114291	0.000182032	1.00153
50	0.0995615	0.999481	1.44727	998617830	218493	0.00138217	0.000218748	0.00132469	0.000206922	0.00133844	0.000209867	0.00134838	0.000211836	0.00135623	0.00021332	1.00335
51	0.0995522	0.999388	1.44335	998363636	254194	0.00163636	0.000254546	0.00156453	0.000239841	0.00158202	0.000243586	0.00159443	0.000246048	0.00160409	0.000247863	0.99816
52	0.0995412	0.999278	1.44738	998066411	297225	0.00193359	0.000297712	0.00184383	0.000279298	0.00186612	0.000284095	0.00188163	0.000287204	0.00189353	0.000289441	0.999572
53	0.0995284	0.999149	1.44552	997719694	346717	0.00228031	0.000347389	0.00216818	0.00032435	0.0021966	0.000330477	0.00221604	0.000334409	0.0022307	0.000337167	1.00025
54	0.0995136	0.998999	1.44799	997315971	403723	0.00268403	0.000404646	0.00254402	0.000375838	0.00258023	0.000383634	0.00260466	0.00038862	0.00262273	0.000392027	1.0009
55	0.0994965	0.998826	1.44452	996847102	468869	0.0031529	0.000470131	0.00297818	0.000434166	0.00302427	0.000444038	0.00305502	0.000450358	0.00307731	0.000454583	1.00084
56	0.0994763	0.998624	1.44682	996304138	542964	0.00369586	0.000544681	0.00347806	0.000499877	0.00353657	0.000512306	0.00357533	0.000520306	0.00360287	0.000525565	1.00003
57	0.0994532	0.998392	1.44444	995676591	627547	0.00432341	0.000629875	0.00405219	0.000574136	0.00412627	0.000589697	0.00417515	0.000599825	0.00420926	0.000606389	0.999613
58	0.0994265	0.998123	1.44413	994951072	725519	0.00504893	0.000728669	0.00471147	0.000659272	0.00480499	0.000678716	0.00486669	0.000691536	0.00490903	0.000699763	1.0021
59	0.0993958	0.997815	1.44336	994118294	832778	0.00588171	0.000837004	0.00546267	0.000751203	0.00558024	0.000775258	0.00565803	0.000791339	0.00571065	0.000801624	1.00029
60	0.099361	0.997461	1.44281	993163808	954486	0.00683619	0.000960133	0.00631693	0.000854255	0.00646408	0.00088384	0.00656196	0.000903936	0.00662745	0.000916803	1.00024
61	0.099321	0.997058	1.44173	992074894	1088914	0.00792511	0.00109641	0.00728334	0.000966417	0.00746659	0.0010025	0.00758939	0.00102743	0.00767093	0.00104347	0.999117
62	0.0992755	0.9966	1.43893	990833026	1241868	0.00916697	0.00125179	0.00837565	0.0010923	0.00860276	0.00113617	0.00875636	0.00116696	0.00885794	0.00118701	1.00162
63	0.0992244	0.996081	1.43918	989429473	1403553	0.0105705	0.00141654	0.00959829	0.00122265	0.00987815	0.00127539	0.0100694	0.00131301	0.0101957	0.00133781	0.999404
64	0.0991665	0.995494	1.43821	987846026	1583447	0.012154	0.00160036	0.0109634	0.00136515	0.0113065	0.00142834	0.0115434	0.00147408	0.0117004	0.00150465	1.00013
65	0.0991018	0.994838	1.43615	986070579	1775447	0.0139294	0.00179729	0.0124773	0.00151381	0.0128955	0.00158901	0.0131875	0.00164404	0.0133818	0.00168142	0.99982
66	0.0990298	0.994106	1.43443	984092130	1978449	0.0159079	0.0020064	0.0141442	0.00166698	0.0146514	0.00175588	0.0150089	0.00182145	0.0152486	0.00186674	0.998814
67	0.0989498	0.993293	1.43319	981895493	2196637	0.0181045	0.00223215	0.0159715	0.00182731	0.0165835	0.00193209	0.0170186	0.00200968	0.0173127	0.00206415	0.999987
68	0.0988617	0.992397	1.43135	979476362	2419131	0.0205236	0.00246374	0.0179563	0.00198479	0.0186908	0.00210733	0.0192169	0.00219824	0.0195758	0.00226307	0.999152
69	0.0987649	0.991414	1.42976	976825049	2651313	0.023175	0.00270687	0.0200993	0.00214295	0.0209766	0.0022858	0.0216085	0.0023916	0.022044	0.00246819	0.999841
70	0.0986599	0.990346	1.4267	973941298	2883751	0.0260587	0.00295217	0.0223925	0.00229319	0.0234354	0.00245879	0.0241894	0.00258093	0.0247143	0.00267031	0.999451
71	0.0985474	0.989191	1.42403	970823549	3117749	0.0291765	0.00320117	0.0248281	0.00243566	0.0260623	0.00262692	0.0269564	0.00276702	0.0275846	0.00287034	0.999663
72	0.0984263	0.98795	1.4218	967475852	3347697	0.0325241	0.00344831	0.0273931	0.00256492	0.0288471	0.00278483	0.0299009	0.00294452	0.0306474	0.00306277	0.999647
73	0.0982975	0.986627	1.41836	963902249	3573603	0.0360978	0.00369374	0.0300732	0.00268011	0.0317791	0.00293198	0.0330139	0.003113	0.0338947	0.0032473	1.00033
74	0.0981609	0.985222	1.41593	960114253	3787996	0.0398857	0.00392985	0.0328483	0.0027751	0.0348408	0.00306169	0.0362797	0.00326578	0.0373116	0.00341694	1.00037
75	0.0980174	0.98374	1.41353	956127475	3986778	0.0438725	0.0041524	0.0356951	0.00284682	0.0380111	0.00317033	0.039679	0.00339927	0.0408798	0.00356813	0.999472
76	0.0978674	0.982186	1.41038	951951267	4176208	0.0480487	0.00436784	0.0385948	0.00289971	0.0412737	0.00326256	0.0431977	0.00351875	0.0445862	0.00370641	0.999734
77	0.0977114	0.980567	1.4063	947596560	4354707	0.0524034	0.00457451	0.0415268	0.00293196	0.0446102	0.00333647	0.0468202	0.00362253	0.0484164	0.00383025	1.00098
78	0.0975498	0.978891	1.40243	943087071	4509489	0.0569129	0.00475887	0.0444614	0.00293466	0.0479922	0.003382	0.0505201	0.00369983	0.0523447	0.00392826	1.00049
79	0.0973836	0.977161	1.39902	938439255	4647816	0.0615607	0.0049283	0.0473745	0.00291307	0.0513972	0.00340501	0.0542767	0.00375664	0.0563517	0.00400707	1.00006
80	0.0972132	0.975383	1.39559	933666411	4772844	0.0663336	0.00508594	0.0502441	0.00286958	0.0548053	0.00340812	0.0580721	0.00379541	0.0604212	0.00406949	1.00034
81	0.0970391	0.973565	1.39135	928788665	4877746	0.0712113	0.00522429	0.0530447	0.00280068	0.0581921	0.00338681	0.0618828	0.00381062	0.0645311	0.00410984	0.999785
82	0.0968616	0.971709	1.38779	923816079	4972586	0.0761839	0.00535384	0.0557573	0.00271252	0.0615401	0.00334797	0.0656926	0.00380987	0.0686676	0.00413652	1.00032
83	0.0966822	0.969824	1.38342	918766065	5050014	0.0812339	0.00546647	0.0583589	0.00260164	0.0648265	0.00328642	0.06948	0.00378738	0.0728109	0.00414331	1.00026
84	0.0965011	0.967914	1.37966	913656679	5109386	0.0863433	0.00556114	0.0608286	0.00246972	0.0680289	0.00320236	0.0732232	0.00374316	0.0769406	0.00412971	0.99928
85	0.0963171	0.965981	1.37551	908488600	5168079	0.0915114	0.00565648	0.0631558	0.00232721	0.0711361	0.0031072	0.0769135	0.00369034	0.0810503	0.00410971	1.00054
86	0.0961334	0.964033	1.37148	903286672	5201928	0.0967133	0.00572591	0.0653208	0.00216499	0.0741229	0.00298682	0.0805254	0.00361191	0.0851142	0.00406388	0.99913
87	0.0959475	0.962066	1.36834	898047924	5238748	0.101952	0.00579965	0.067318	0.00199719	0.0769806	0.00285771	0.0840526	0.00352717	0.089128	0.0040138	1.00017
88	0.0957619	0.960091	1.36373	892790669	5257255	0.107209	0.00585409	0.0691353	0.00181728	0.079689	0.00270841	0.0874739	0.00342129	0.0930708	0.00394281	0.999389
89	0.0955756	0.958106	1.35988	887512903	5277766	0.112487	0.00591154	0.0707703	0.00163503	0.0822401	0.00255111	0.0907818	0.00330789	0.0969373	0.00386652	1.00044
90	0.0953889	0.956114	1.3559	882227821	5285082	0.117772	0.00595494	0.0722185	0.00144814	0.08462	0.0023799	0.0939593	0.00317755	0.100711	0.00377389	1.00027
91	0.0952027	0.954122	1.35177	876945152	5282669	0.123055	0.00598787	0.0734799	0.00126142	0.0868186	0.00219859	0.0969925	0.00303318	0.104379	0.00366797	0.999353
92	0.0950158	0.952125	1.34819	871662800	5282352	0.128337	0.00602358	0.0745612	0.00108127	0.0888324	0.00201382	0.099874	0.0028815	0.107936	0.00355653	0.999786
93	0.0948299	0.950128	1.34403	866386207	5276593	0.133614	0.00605348	0.0754704	0.000909263	0.0906564	0.00182396	0.102592	0.00271837	0.11137	0.00343387	1.00001
94	0.0946444	0.948131	1.34055	861123671	5262536	0.138876	0.00607412	0.0762188	0.000748385	0.0922867	0.00163031	0.105136	0.00254375	0.114668	0.00329835	0.999375
95	0.094459	0.946138	1.33616	855872957	5250714	0.144127	0.00609751	0.0768219	0.000603123	0.0937254	0.00143872	0.107501	0.00236442	0.117825	0.00315689	0.999758
96	0.0942744	0.944148	1.33227	850639024	5233933	0.149361	0.00611532	0.0772963	0.000474404	0.0949752	0.00124978	0.109679	0.00217831	0.12083	0.00300519	0.999715
97	0.0940903	0.942162	1.32826	845425232	5213792	0.154575	0.00612927	0.0776605	0.000364131	0.0960424	0.00106724	0.111667	0.00198768	0.123674	0.0028441	0.999464
98	0.0939081	0.940184	1.32333	840227386	5197846	0.159773	0.0061482	0.0779336	0.000273095	0.0969381	0.000895693	0.113463	0.00179674	0.126352	0.0026778	1.00039
99	0.0937263	0.938209	1.32032	835054156	5173230	0.164946	0.00615694	0.0781332	0.000199661	0.0976738	0.000735685	0.115066	0.00160264	0.128852	0.00250058	0.999962
100	0.0935443	0.936239	1.31637	829903333	5150823	0.170097	0.00616825	0.078276	0.000142755	0.0982655	0.000591649	0.116477	0.00141135	0.131172	0.00231944	1.00022
101	0.093364	0.934276	1.31266	824782950	5120383	0.175217	0.00616985	0.0783757	9.96939e-05	0.0987296	0.000464112	0.1177	0.00122267	0.133303	0.00213105	0.999136
102	0.0931858	0.932323	1.30803	819683968	5098982	0.180316	0.00618221	0.0784438	6.81479e-05	0.0990857	0.000356113	0.118744	0.00104374	0.135247	0.00194391	0.999988
103	0.0930073	0.930372	1.30507	814609592	5074376	0.18539	0.00619065	0.0784892	4.53649e-05	0.0993523	0.000266608	0.119618	0.000874416	0.137001	0.00175406	1.00037
104	0.0928299	0.928429	1.30111	809564138	5045454	0.190436	0.00619371	0.0785185	2.93393e-05	0.099547	0.000194729	0.120336	0.000717514	0.138564	0.00156306	1.00003
105	0.0926529	0.926492	1.2975	804544380	5019758	0.195456	0.00620057	0.0785369	1.84225e-05	0.0996861	0.000139123	0.120912	0.000576595	0.139939	0.00137544	1.00042
106	0.092478	0.924563	1.29384	799553071	4991309	0.200447	0.0062039	0.0785481	1.11805e-05	0.0997833	9.71808e-05	0.121365	0.000452412	0.141131	0.00119185	1.00035
107	0.0923034	0.922639	1.29028	794588203	4964868	0.205412	0.00620955	0.0785547	6.5288e-06	0.0998497	6.63555e-05	0.121711	0.000346746	0.142148	0.00101628	1.00075
108	0.0921296	0.920727	1.28598	789655202	4933001	0.210345	0.00620825	0.0785583	3.67509e-06	0.0998938	4.4101e-05	0.121971	0.00025918	0.142998	0.000850055	1.00009
109	0.0919568	0.918821	1.28269	784750805	4904397	0.215249	0.00621081	0.0785603	1.96176e-06	0.0999223	2.85191e-05	0.12216	0.000189285	0.143695	0.000697454	1.00013
110	0.0917857	0.916924	1.279	779875351	4875454	0.220125	0.00621274	0.0785613	9.99468e-07	0.0999402	1.78929e-05	0.122295	0.000135123	0.144255	0.000560019	1.00012
111	0.0916155	0.915036	1.27511	775031091	4844260	0.224969	0.00621158	0.0785618	4.84426e-07	0.099951	1.08511e-05	0.122389	9.43177e-05	0.144694	0.000439084	0.999655
112	0.0914458	0.913156	1.27123	770212988	4818103	0.229787	0.00621666	0.078562	2.16815e-07	0.0999574	6.33581e-06	0.122454	6.43939e-05	0.145031	0.000336496	1.00024
113	0.0912769	0.911279	1.26876	765425650	4787338	0.234574	0.0062156	0.0785621	9.57468e-08	0.0999609	3.56657e-06	0.122496	4.27988e-05	0.145282	0.000251527	0.999869
114	0.0911096	0.909415	1.26436	760667957	4757693	0.239332	0.00621575	0.0785621	2.37885e-08	0.0999629	1.90308e-06	0.122524	2.7666e-05	0.145466	0.000183623	0.999722
115	0.090943	0.907557	1.26112	755939218	4728739	0.244061	0.00621656	0.0785621	0	0.0999638	9.69391e-07	0.122541	1.73545e-05	0.145597	0.000131057	0.999708
116	0.0907774	0.905704	1.25807	751238811	4700407	0.248761	0.00621797	0.0785621	0	0.0999643	4.70041e-07	0.122552	1.05289e-05	0.145688	9.15169e-05	0.999811
117	0.0906137	0.903862	1.25401	746568532	4670279	0.253431	0.00621677	0.0785621	0	0.0999645	2.10163e-07	0.122558	6.14142e-06	0.145751	6.24183e-05	0.999513
118	0.0904502	0.902028	1.25061	741927321	4641211	0.258073	0.00621672	0.0785621	0	0.0999646	9.28242e-08	0.122562	3.4577e-06	0.145792	4.14924e-05	0.999415
119	0.0902882	0.900201	1.24668	737308367	4618954	0.262692	0.00622562	0.0785621	0	0.0999646	2.30948e-08	0.122563	1.84758e-06	0.145819	2.68592e-05	1.00077
120	0.0901263	0.898379	1.24431	732722112	4586255	0.267278	0.00622027	0.0785621	0	0.0999646	0	0.122564	9.40182e-07	0.145836	1.68316e-05	0.999843
