# Supplementary material for: Quantifying the Potential for Future Gene Therapy to Lower Lifetime Risk of Polygenic Late-Onset Diseases
Source: MDPI journal article supplement (doi:10.3390/ijms20133352), 2019-07-08
Supplement: s2 [file s2 › SuppFiles/Results/LODsCommonLow/LungCancer/1.000/IndividualsByBetaDistrib.csv]

nEntry	Beta	nDetrimentalCount	nFractionPopulation	nCumulativeFractionPopulation	nEditsNeeded	nIndividuals
0	-19.8	0	0	1	0	0
1	-19.6	0	0	1	0	0
2	-19.4	0	0	1	0	0
3	-19.2	0	0	1	0	0
4	-19	0	0	1	0	0
5	-18.8	0	0	1	0	0
6	-18.6	0	0	1	0	0
7	-18.4	0	0	1	0	0
8	-18.2	0	0	1	0	0
9	-18	0	0	1	0	0
10	-17.8	0	0	1	0	0
11	-17.6	0	0	1	0	0
12	-17.4	0	0	1	0	0
13	-17.2	0	0	1	0	0
14	-17	0	0	1	0	0
15	-16.8	0	0	1	0	0
16	-16.6	0	0	1	0	0
17	-16.4	0	0	1	0	0
18	-16.2	0	0	1	0	0
19	-16	0	0	1	0	0
20	-15.8	0	0	1	0	0
21	-15.6	0	0	1	0	0
22	-15.4	0	0	1	0	0
23	-15.2	0	0	1	0	0
24	-15	0	0	1	0	0
25	-14.8	0	0	1	0	0
26	-14.6	0	0	1	0	0
27	-14.4	0	0	1	0	0
28	-14.2	0	0	1	0	0
29	-14	0	0	1	0	0
30	-13.8	0	0	1	0	0
31	-13.6	0	0	1	0	0
32	-13.4	0	0	1	0	0
33	-13.2	0	0	1	0	0
34	-13	0	0	1	0	0
35	-12.8	0	0	1	0	0
36	-12.6	0	0	1	0	0
37	-12.4	0	0	1	0	0
38	-12.2	0	0	1	0	0
39	-12	0	0	1	0	0
40	-11.8	0	0	1	0	0
41	-11.6	0	0	1	0	0
42	-11.4	0	0	1	0	0
43	-11.2	0	0	1	0	0
44	-11	0	0	1	0	0
45	-10.8	0	0	1	0	0
46	-10.6	0	0	1	0	0
47	-10.4	0	0	1	0	0
48	-10.2	0	0	1	0	0
49	-10	0	0	1	0	0
50	-9.8	0	0	1	0	0
51	-9.6	0	0	1	0	0
52	-9.4	0	0	1	0	0
53	-9.2	0	0	1	0	0
54	-9	0	0	1	0	0
55	-8.8	0	0	1	0	0
56	-8.6	0	0	1	0	0
57	-8.4	0	0	1	0	0
58	-8.2	0	0	1	0	0
59	-8	0	0	1	0	0
60	-7.8	0	0	1	0	0
61	-7.6	0	0	1	0	0
62	-7.4	0	0	1	0	0
63	-7.2	0	0	1	0	0
64	-7	0	0	1	0	0
65	-6.8	0	0	1	0	0
66	-6.6	0	0	1	0	0
67	-6.4	0	0	1	0	0
68	-6.2	0	0	1	0	0
69	-6	0	0	1	0	0
70	-5.8	0	0	1	0	0
71	-5.6	0	0	1	0	0
72	-5.4	0	0	1	0	0
73	-5.2	0	0	1	0	0
74	-5	0	0	1	0	0
75	-4.8	0	0	1	0	0
76	-4.6	0	0	1	0	0
77	-4.4	0	0	1	0	0
78	-4.2	0	0	1	0	0
79	-4	0	0	1	0	0
80	-3.8	0	0	1	0	0
81	-3.6	0	0	1	0	0
82	-3.4	25.2	5e-09	1	0	5
83	-3.2	27.565	4.6e-08	1	0	46
84	-3	29.557	3.27e-07	0.99999995	0	327
85	-2.8	31.543	2.116e-06	0.99999962	0	2116
86	-2.6	33.561	1.1678e-05	0.99999751	0	11678
87	-2.4	35.404	5.4299e-05	0.99998583	0	54299
88	-2.2	37.435	0.000218352	0.99993153	0	218352
89	-2	39.289	0.00073522	0.99971318	0	735220
90	-1.8	41.259	0.002211407	0.99897796	0	2211407
91	-1.6	43.127	0.005591895	0.99676655	0	5591895
92	-1.4	45.053	0.012856768	0.99117466	0	12856768
93	-1.2	46.937	0.025073205	0.97831789	0	25073205
94	-1	48.828	0.044728389	0.95324468	0	44728389
95	-0.8	50.725	0.068488897	0.90851629	0	68488897
96	-0.6	52.587	0.096218095	0.8400274	0	96218095
97	-0.4	54.495	0.11722565	0.7438093	0	117225653
98	-0.2	56.335	0.13091749	0.62658365	0	130917493
99	0	58.249	0.12845396	0.49566615	0	128453961
100	0.2	60.075	0.11521244	0.36721219	1.826	115212437
101	0.4	61.993	0.091732125	0.25199976	3.7439	91732125
102	0.6	63.81	0.066505927	0.16026763	5.5613	66505927
103	0.8	65.728	0.043286436	0.093761705	7.4792	43286436
104	1	67.542	0.025559013	0.050475269	9.2931	25559013
105	1.2	69.457	0.013655597	0.024916256	11.208	13655597
106	1.4	71.273	0.006592887	0.011260659	13.024	6592887
107	1.6	73.182	0.002902566	0.004667772	14.933	2902566
108	1.8	75.003	0.001152716	0.001765206	16.754	1152716
109	2	76.911	0.00042049	0.00061249	18.662	420490
110	2.2	78.738	0.000136349	0.000192	20.489	136349
111	2.4	80.633	4.1014e-05	5.5651e-05	22.384	41014
112	2.6	82.476	1.1101e-05	1.4637e-05	24.227	11101
113	2.8	84.348	2.728e-06	3.536e-06	26.099	2728
114	3	86.295	6.51e-07	8.08e-07	28.046	651
115	3.2	87.962	1.3e-07	1.57e-07	29.712	130
116	3.4	89.13	2.3e-08	2.7e-08	30.881	23
117	3.6	92.333	3e-09	4e-09	34.084	3
118	3.8	0	0	1e-09	0	0
119	4	96	1e-09	1e-09	37.751	1
120	4.2	0	0	0	0	0
121	4.4	0	0	0	0	0
122	4.6	0	0	0	0	0
123	4.8	0	0	0	0	0
124	5	0	0	0	0	0
125	5.2	0	0	0	0	0
126	5.4	0	0	0	0	0
127	5.6	0	0	0	0	0
128	5.8	0	0	0	0	0
129	6	0	0	0	0	0
130	6.2	0	0	0	0	0
131	6.4	0	0	0	0	0
132	6.6	0	0	0	0	0
133	6.8	0	0	0	0	0
134	7	0	0	0	0	0
135	7.2	0	0	0	0	0
136	7.4	0	0	0	0	0
137	7.6	0	0	0	0	0
138	7.8	0	0	0	0	0
139	8	0	0	0	0	0
140	8.2	0	0	0	0	0
141	8.4	0	0	0	0	0
142	8.6	0	0	0	0	0
143	8.8	0	0	0	0	0
144	9	0	0	0	0	0
145	9.2	0	0	0	0	0
146	9.4	0	0	0	0	0
147	9.6	0	0	0	0	0
148	9.8	0	0	0	0	0
149	10	0	0	0	0	0
150	10.2	0	0	0	0	0
151	10.4	0	0	0	0	0
152	10.6	0	0	0	0	0
153	10.8	0	0	0	0	0
154	11	0	0	0	0	0
155	11.2	0	0	0	0	0
156	11.4	0	0	0	0	0
157	11.6	0	0	0	0	0
158	11.8	0	0	0	0	0
159	12	0	0	0	0	0
160	12.2	0	0	0	0	0
161	12.4	0	0	0	0	0
162	12.6	0	0	0	0	0
163	12.8	0	0	0	0	0
164	13	0	0	0	0	0
165	13.2	0	0	0	0	0
166	13.4	0	0	0	0	0
167	13.6	0	0	0	0	0
168	13.8	0	0	0	0	0
169	14	0	0	0	0	0
170	14.2	0	0	0	0	0
171	14.4	0	0	0	0	0
172	14.6	0	0	0	0	0
173	14.8	0	0	0	0	0
174	15	0	0	0	0	0
175	15.2	0	0	0	0	0
176	15.4	0	0	0	0	0
177	15.6	0	0	0	0	0
178	15.8	0	0	0	0	0
179	16	0	0	0	0	0
180	16.2	0	0	0	0	0
181	16.4	0	0	0	0	0
182	16.6	0	0	0	0	0
183	16.8	0	0	0	0	0
184	17	0	0	0	0	0
185	17.2	0	0	0	0	0
186	17.4	0	0	0	0	0
187	17.6	0	0	0	0	0
188	17.8	0	0	0	0	0
189	18	0	0	0	0	0
190	18.2	0	0	0	0	0
191	18.4	0	0	0	0	0
192	18.6	0	0	0	0	0
193	18.8	0	0	0	0	0
194	19	0	0	0	0	0
195	19.2	0	0	0	0	0
196	19.4	0	0	0	0	0
197	19.6	0	0	0	0	0
198	19.8	0	0	0	0	0
199	20	0	0	0	0	0
