# Supplementary material for: Quantifying the Potential for Future Gene Therapy to Lower Lifetime Risk of Polygenic Late-Onset Diseases
Source: MDPI journal article supplement (doi:10.3390/ijms20133352), 2019-07-08
Supplement: s2 [file s2 › SuppFiles/Results/LODsCommonLow/LungCancer/1.000/ScatterData.csv]

Age	OR	Beta
45	1.0901	0.086291
46	0.958	-0.042909
46	2.7497	1.0115
47	1.2991	0.26167
51	1.7219	0.54343
51	3.7395	1.319
51	2.9517	1.0824
51	1.062	0.060137
51	1.7471	0.55796
52	1.341	0.2934
52	0.75732	-0.27797
53	1.9069	0.6455
53	1.0995	0.094884
54	1.1115	0.10572
54	0.96904	-0.031445
54	1.9804	0.68328
55	3.6478	1.2941
55	0.62704	-0.46675
55	1.7418	0.55494
55	1.2696	0.23867
56	0.73782	-0.30405
56	0.88412	-0.12316
56	0.57721	-0.54955
57	1.9071	0.6456
57	2.1164	0.74974
57	1.1226	0.11563
57	0.91963	-0.083779
57	2.4556	0.89838
57	2.8678	1.0535
57	0.77357	-0.25674
58	1.1333	0.12512
58	1.3412	0.29357
58	2.0716	0.7283
58	1.6517	0.50183
59	1.4913	0.39962
59	1.0706	0.068228
59	1.9677	0.67685
59	2.7711	1.0193
59	2.2342	0.80388
59	1.6863	0.52251
59	1.3854	0.32602
60	1.6769	0.51694
60	0.76235	-0.27135
60	2.0687	0.7269
60	1.3144	0.27341
60	1.7198	0.54219
60	2.1338	0.7579
60	0.47087	-0.75317
60	1.688	0.52354
61	0.7983	-0.22527
61	2.3999	0.87543
61	1.2281	0.20547
61	4.4138	1.4847
61	3.9479	1.3732
61	0.79723	-0.22661
61	0.90685	-0.09778
61	0.78732	-0.23912
61	4.0326	1.3944
61	1.751	0.5602
61	1.3249	0.28137
62	1.6691	0.51226
62	1.0486	0.047484
62	0.46347	-0.76902
62	1.2493	0.22255
62	0.88069	-0.12705
62	2.0048	0.69555
62	1.6459	0.49826
63	0.86035	-0.15042
63	2.1354	0.75864
63	3.4603	1.2413
63	1.095	0.090748
63	2.1761	0.77751
63	2.7235	1.0019
63	1.2508	0.22378
63	6.9218	1.9347
63	1.086	0.082516
63	1.1383	0.12953
63	3.9649	1.3775
63	1.2367	0.21242
63	0.63652	-0.45174
64	0.57768	-0.54873
64	2.5063	0.9188
64	2.4307	0.88817
64	1.6113	0.47702
64	1.8208	0.59929
64	0.76608	-0.26647
64	4.0531	1.3995
64	0.81101	-0.20947
64	1.4687	0.38434
64	1.752	0.56078
64	1.5719	0.45226
64	0.39365	-0.93228
64	1.2095	0.19017
64	0.50963	-0.67408
64	1.6396	0.49446
64	1.0439	0.042921
64	1.7973	0.5863
64	1.8826	0.63267
64	2.3227	0.84273
65	1.0468	0.045732
65	1.4946	0.40187
65	1.4157	0.34766
65	1.8741	0.62813
65	2.4512	0.89658
65	1.1738	0.16026
65	3.6919	1.3061
65	1.8878	0.63544
65	1.97	0.67805
65	1.7902	0.58233
65	2.4994	0.91606
65	1.2605	0.23152
65	2.6405	0.97096
65	1.6889	0.52408
65	1.8026	0.58923
65	0.91378	-0.090161
66	1.1431	0.13374
66	1.8263	0.60227
66	5.2502	1.6583
66	3.267	1.1839
66	1.1808	0.16616
66	3.3532	1.2099
66	1.2612	0.23208
66	2.1535	0.76708
66	1.4448	0.36799
66	0.9506	-0.05066
66	0.73438	-0.30873
66	0.50436	-0.68447
66	2.2908	0.82891
66	0.5864	-0.53375
66	0.91852	-0.084991
66	2.6554	0.97659
66	1.4563	0.37591
67	2.0695	0.72731
67	2.2386	0.80585
67	1.1622	0.15033
67	1.5216	0.41978
67	2.0858	0.73515
67	1.5575	0.44306
67	1.4863	0.39627
67	1.4856	0.39582
67	0.61623	-0.48414
67	1.1328	0.12469
67	3.62	1.2865
67	4.1283	1.4179
67	1.5815	0.45837
67	1.3331	0.28751
67	0.68429	-0.37937
67	1.6412	0.4954
67	3.6248	1.2878
67	1.8958	0.63964
67	1.2915	0.25582
67	0.84654	-0.1666
67	2.0691	0.72713
67	1.1765	0.16255
68	3.5215	1.2589
68	1.0587	0.057011
68	1.2685	0.23784
68	1.3506	0.30056
68	1.23	0.207
68	1.188	0.17226
68	1.1222	0.11529
68	1.2351	0.21116
68	2.1283	0.75533
68	2.1982	0.78762
68	0.77668	-0.25272
68	1.3263	0.2824
68	4.0696	1.4036
68	1.0123	0.012217
68	8.9625	2.193
68	2.4663	0.90272
68	5.4546	1.6965
69	2.9714	1.089
69	2.5335	0.9296
69	1.1433	0.13392
69	0.90583	-0.098909
69	4.7567	1.5596
69	0.59727	-0.51539
69	1.5694	0.45071
69	1.4091	0.34297
69	1.3987	0.33555
69	2.189	0.78344
69	1.1705	0.15743
69	3.002	1.0993
69	1.9352	0.66023
69	1.1859	0.17051
69	1.4984	0.40442
69	3.2977	1.1932
69	1.645	0.49776
69	1.2162	0.19575
69	2.4813	0.90877
69	1.07	0.067621
69	1.7037	0.5328
69	1.0396	0.03883
70	1.9473	0.66645
70	2.0001	0.69319
70	0.91489	-0.08895
70	0.91847	-0.085043
70	0.82185	-0.19619
70	2.2025	0.78958
70	0.60455	-0.50327
70	1.3489	0.29928
70	0.93011	-0.072455
70	0.60054	-0.50992
70	1.3118	0.27137
70	3.9873	1.3831
70	1.1173	0.11094
70	2.3044	0.83483
70	4.5655	1.5185
70	1.7581	0.56422
70	1.9181	0.65135
70	2.2382	0.80568
70	0.99165	-0.0083843
70	2.8103	1.0333
70	2.2415	0.80713
70	0.61589	-0.48469
70	0.7332	-0.31034
71	4.0229	1.392
71	0.9105	-0.093758
71	0.86826	-0.14127
71	0.42087	-0.86544
71	0.9776	-0.02265
71	0.69323	-0.36639
71	1.79	0.58224
71	1.5941	0.46628
71	0.68094	-0.38428
71	0.58626	-0.53399
71	2.3483	0.8537
71	0.44682	-0.80561
71	2.4778	0.90736
71	1.7719	0.57206
71	0.68726	-0.37504
71	0.95947	-0.041371
71	1.6985	0.52974
71	0.75715	-0.2782
71	2.073	0.72902
71	0.6801	-0.38551
71	1.6641	0.50929
71	2.2336	0.8036
71	0.97433	-0.026002
71	4.9131	1.5919
71	0.33086	-1.1061
71	0.40569	-0.90218
72	1.7491	0.55912
72	2.0426	0.71422
72	2.5399	0.93214
72	3.1901	1.1601
72	3.8375	1.3448
72	1.203	0.1848
72	2.6642	0.97992
72	3.4663	1.2431
72	3.0914	1.1286
72	2.9598	1.0851
72	3.0537	1.1164
72	2.6412	0.97124
72	1.629	0.48794
72	5.6558	1.7327
72	1.4856	0.39582
72	2.0223	0.70425
72	3.57	1.2726
72	1.5534	0.44045
72	1.5599	0.44461
72	1.1228	0.11578
72	1.227	0.20459
73	1.7767	0.57478
73	0.81039	-0.21024
73	5.4637	1.6981
73	1.4051	0.34011
73	1.3153	0.27408
73	2.0704	0.72776
73	0.84049	-0.17377
73	1.7678	0.56972
73	1.4838	0.39459
73	0.64409	-0.43991
73	3.1247	1.1393
73	1.2353	0.21134
73	2.0732	0.72911
73	1.5058	0.40933
73	1.5886	0.46285
73	1.1551	0.14414
73	2.9921	1.096
73	1.0845	0.08109
73	5.4301	1.692
73	0.84786	-0.16504
73	2.509	0.91989
73	2.7593	1.015
73	3.4405	1.2356
73	1.7506	0.55995
74	1.169	0.15612
74	0.96639	-0.034185
74	0.96618	-0.03441
74	3.4815	1.2475
74	1.0309	0.030423
74	1.3165	0.27498
74	1.0457	0.044722
74	0.61293	-0.4895
74	0.39466	-0.92973
74	1.3784	0.32092
74	2.2848	0.82629
74	0.80923	-0.21167
74	3.1789	1.1565
74	2.2891	0.82815
74	2.8873	1.0603
74	1.4181	0.34933
74	0.50191	-0.68933
74	1.3301	0.28524
74	0.39717	-0.92339
74	1.9268	0.65586
74	1.1413	0.13217
74	1.2062	0.18752
74	2.3317	0.8466
74	0.45993	-0.77668
74	1.235	0.21107
74	2.3726	0.86397
74	0.95278	-0.048367
74	1.2061	0.18738
74	2.8101	1.0332
74	1.0582	0.056547
74	0.82569	-0.19154
75	0.75696	-0.27844
75	1.1655	0.15313
75	1.077	0.074212
75	0.89464	-0.11134
75	1.3109	0.27071
75	2.0072	0.69672
75	2.4214	0.88433
75	4.0832	1.4069
75	2.5707	0.94417
75	1.8342	0.60662
75	0.98709	-0.012996
75	0.78707	-0.23944
75	1.3527	0.30213
75	1.5464	0.43591
75	2.1098	0.74661
75	1.75	0.55963
75	2.0259	0.706
75	2.9492	1.0815
75	1.9405	0.66293
75	1.1295	0.12174
75	0.64572	-0.43738
75	1.1243	0.11714
75	0.92247	-0.080696
75	0.433	-0.83702
75	1.8949	0.63917
75	4.3626	1.4731
76	0.95367	-0.04744
76	1.6333	0.49059
76	2.5154	0.92245
76	1.0207	0.020473
76	1.4603	0.37866
76	0.8365	-0.17852
76	4.2776	1.4534
76	0.23549	-1.4461
76	1.7425	0.55529
76	0.81626	-0.20302
76	1.9487	0.66719
76	1.2849	0.25069
76	0.82059	-0.19773
76	0.7172	-0.33241
76	0.56078	-0.57843
76	0.46028	-0.77592
76	2.1765	0.77771
76	2.8862	1.0599
76	1.0163	0.016133
76	0.83286	-0.18289
76	1.2392	0.21444
76	2.7674	1.0179
76	1.6372	0.49302
76	1.701	0.53122
76	1.1603	0.14864
76	0.95482	-0.046227
76	1.5651	0.44794
76	2.8428	1.0448
76	1.5725	0.45264
76	1.4863	0.39629
76	0.78074	-0.24752
76	1.8464	0.61325
76	0.97927	-0.020944
76	1.3294	0.28474
76	1.3481	0.29867
77	0.98834	-0.011726
77	1.5703	0.45129
77	3.5426	1.2648
77	1.4408	0.36518
77	0.74917	-0.28879
77	2.8025	1.0305
77	1.5001	0.40551
77	2.2	0.78845
77	1.4456	0.36849
77	0.58578	-0.53481
77	1.7106	0.53684
77	1.4879	0.39735
77	1.9981	0.69218
77	3.5144	1.2569
77	2.3931	0.87258
77	2.626	0.96545
77	1.2894	0.25419
77	1.5974	0.4684
77	1.9571	0.67149
77	1.1028	0.09785
77	3.0082	1.1014
77	1.2862	0.25172
77	2.3503	0.85454
77	1.6742	0.51534
77	1.4601	0.37848
77	0.35518	-1.0351
77	0.59651	-0.51666
77	1.3759	0.31913
77	1.9497	0.66769
77	0.81576	-0.20363
77	1.5067	0.40992
77	6.5487	1.8793
78	1.9453	0.66542
78	1.0595	0.057754
78	0.29141	-1.233
78	0.36742	-1.0013
78	0.48825	-0.71693
78	2.9288	1.0746
78	2.457	0.89894
78	2.9516	1.0823
78	2.5211	0.92471
78	1.2133	0.19337
78	0.41898	-0.86992
78	2.1239	0.75324
78	2.7897	1.0259
78	0.5646	-0.57164
78	0.62363	-0.47219
78	0.89297	-0.1132
78	1.1061	0.10088
78	2.9683	1.088
78	2.6357	0.96915
78	1.332	0.28672
78	1.1483	0.13826
78	0.90978	-0.094548
78	0.96836	-0.032155
78	1.8359	0.60752
78	2.2914	0.82918
78	1.5178	0.41724
78	1.2294	0.20653
78	1.3769	0.31984
79	1.1756	0.16181
79	0.8225	-0.19541
79	1.5935	0.46591
79	2.8406	1.044
79	1.281	0.24761
79	3.4093	1.2265
79	2.4144	0.88145
79	2.0083	0.6973
79	1.2048	0.18628
79	1.4275	0.35591
79	2.4238	0.88534
79	1.8491	0.61469
79	0.81767	-0.2013
79	2.2153	0.7954
79	5.3323	1.6738
79	2.2775	0.8231
79	0.92247	-0.080705
79	0.37712	-0.97519
79	3.6432	1.2929
79	1.5381	0.43056
79	1.1265	0.11909
79	1.3495	0.29975
79	1.0354	0.034817
79	1.3968	0.33417
79	1.5937	0.46607
79	1.6183	0.4814
79	2.1793	0.77902
80	0.88075	-0.12698
80	1.3231	0.28
80	3.4928	1.2507
80	1.3142	0.27323
80	2.1376	0.75967
80	0.40582	-0.90184
80	0.95824	-0.042655
80	3.3335	1.204
80	1.2807	0.24737
80	1.3553	0.30404
80	0.88777	-0.11904
80	1.3578	0.30589
80	1.3543	0.30329
80	0.82082	-0.19745
80	2.8802	1.0579
80	1.0285	0.028114
80	0.30675	-1.1817
80	2.9538	1.0831
80	1.0134	0.013309
80	2.6371	0.96969
80	1.5986	0.46913
80	2.1436	0.7625
80	1.7648	0.56802
80	2.2553	0.81329
80	0.78734	-0.2391
80	1.9385	0.66194
80	0.49365	-0.70593
80	3.0267	1.1075
80	2.3937	0.87282
80	1.4608	0.37902
80	0.66289	-0.41115
80	2.0272	0.70667
80	0.82697	-0.18999
80	1.2359	0.21183
80	0.57898	-0.54649
80	2.029	0.70755
80	1.2544	0.22664
81	0.71799	-0.3313
81	1.008	0.007974
81	1.0836	0.080317
81	3.8765	1.3549
81	2.4012	0.87598
81	0.68864	-0.37304
81	0.63411	-0.45554
81	1.1538	0.14304
81	1.3917	0.3305
81	0.66614	-0.40626
81	1.1466	0.13677
81	1.5819	0.45866
81	1.2692	0.23838
81	1.7569	0.56353
81	1.443	0.3667
81	2.5334	0.92955
81	3.7514	1.3221
81	3.3207	1.2002
81	1.5397	0.43161
81	0.76434	-0.26874
81	1.8394	0.60943
81	3.2243	1.1707
81	2.5456	0.93437
81	1.1174	0.11104
81	1.2362	0.21201
81	1.1616	0.14976
81	1.3617	0.30874
81	1.9294	0.65719
81	1.9671	0.67658
81	2.5317	0.9289
81	2.1726	0.77592
81	2.5251	0.92629
82	1.0524	0.051057
82	1.1093	0.10369
82	1.542	0.43309
82	1.1168	0.11043
82	0.7335	-0.30993
82	3.5075	1.2549
82	1.5607	0.44513
82	0.80422	-0.21788
82	2.5025	0.9173
82	1.2922	0.25633
82	2.2335	0.80356
82	1.3048	0.26607
82	1.6097	0.47603
82	1.7575	0.56388
82	1.8415	0.6106
82	1.1723	0.15893
82	0.32816	-1.1143
82	1.5785	0.45646
82	1.2651	0.23516
82	0.77399	-0.25619
82	1.9603	0.6731
82	2.0145	0.70036
82	0.61606	-0.48442
82	3.3945	1.2222
82	3.0394	1.1116
82	0.68203	-0.38268
82	1.0624	0.060562
82	1.7133	0.5384
82	1.0578	0.056232
83	1.3222	0.27929
83	1.7133	0.5384
83	1.6556	0.50417
83	0.57982	-0.54503
83	1.7911	0.58282
83	4.0882	1.4081
83	0.89549	-0.11039
83	0.3606	-1.02
83	2.507	0.91907
83	1.9732	0.67966
83	0.67452	-0.39376
83	1.0461	0.045036
83	0.71161	-0.34023
83	3.222	1.17
83	0.99437	-0.0056445
83	1.8816	0.63211
83	1.3064	0.26726
83	1.0024	0.0023608
83	2.7012	0.9937
83	0.58118	-0.54269
83	1.758	0.56417
83	1.1636	0.15152
83	1.4866	0.39649
83	1.9798	0.68301
83	1.0672	0.064994
83	1.4124	0.34529
83	1.4026	0.33832
83	0.77845	-0.25045
83	0.99928	-0.00071809
83	0.66414	-0.40927
83	0.4867	-0.7201
83	1.6744	0.51545
84	1.8639	0.62265
84	1.1827	0.1678
84	1.6034	0.47214
84	1.5905	0.46405
84	2.2802	0.82428
84	0.49883	-0.69549
84	1.3847	0.32548
84	1.7941	0.58453
84	1.4202	0.35081
84	1.243	0.21755
84	1.4242	0.35364
84	1.7041	0.53305
84	1.917	0.65078
84	1.258	0.22955
84	2.4233	0.88512
84	4.4398	1.4906
84	1.4818	0.39326
84	7.4942	2.0141
84	2.6023	0.95638
84	1.8365	0.60788
84	0.36104	-1.0188
84	1.6496	0.50055
84	0.9556	-0.045419
84	1.8375	0.6084
84	4.0489	1.3984
84	3.0325	1.1094
84	1.5921	0.46507
85	1.0031	0.0030809
85	3.0421	1.1126
85	1.4041	0.33938
85	1.4401	0.3647
85	0.46298	-0.77007
85	2.2262	0.80028
85	2.3213	0.84212
85	1.2208	0.19954
85	0.72111	-0.32696
85	1.3571	0.30537
85	0.67975	-0.38603
85	2.1305	0.75634
85	1.0601	0.058325
85	1.0385	0.03775
85	0.75441	-0.28182
85	4.0819	1.4066
85	1.7353	0.55116
85	4.5214	1.5088
85	2.0161	0.70117
85	2.2995	0.83269
85	1.5285	0.4243
85	0.65068	-0.42974
85	1.7024	0.53202
85	2.3682	0.86215
85	3.8099	1.3376
86	0.59376	-0.52128
86	1.1941	0.17739
86	1.1378	0.12908
86	0.94083	-0.060996
86	0.63656	-0.45167
86	2.3187	0.84099
86	1.2506	0.22361
86	0.72051	-0.3278
86	1.9417	0.66357
86	4.9579	1.601
86	0.66859	-0.40259
86	1.0961	0.091783
86	9.1493	2.2137
86	1.0421	0.041192
86	0.90379	-0.10116
86	1.2406	0.21563
86	1.1586	0.14718
86	1.7118	0.53756
86	1.2707	0.23957
86	1.0137	0.013642
86	1.7473	0.55808
86	1.2918	0.25604
86	1.0191	0.018897
86	0.78434	-0.24292
86	2.0714	0.72823
86	0.83346	-0.18217
86	4.9302	1.5954
87	3.4017	1.2243
87	1.7245	0.54495
87	2.3391	0.84979
87	4.1768	1.4296
87	0.56294	-0.57458
87	1.1008	0.096054
87	0.5605	-0.57893
87	1.0576	0.05603
87	1.5166	0.41648
87	0.88034	-0.12745
87	1.3192	0.27703
87	0.48987	-0.71362
87	1.1987	0.18123
87	2.6882	0.98885
87	1.3205	0.27799
88	2.2816	0.82487
88	1.3776	0.32038
88	1.4533	0.37387
88	1.8762	0.62926
88	5.6669	1.7346
88	1.5128	0.41396
88	0.75827	-0.27672
88	0.76568	-0.26699
88	1.5397	0.43157
88	0.30441	-1.1894
88	0.64374	-0.44046
88	0.76511	-0.26773
88	2.2926	0.82969
88	2.523	0.92545
88	1.7796	0.57639
88	1.2871	0.25239
88	0.85421	-0.15758
88	0.96611	-0.034477
89	1.5608	0.44518
89	4.4682	1.497
89	2.7848	1.0242
89	1.0903	0.086452
89	3.9299	1.3686
89	0.84984	-0.1627
89	1.2142	0.19406
89	0.51779	-0.65818
89	0.85764	-0.15357
89	0.58915	-0.52907
89	1.5204	0.41897
89	1.4779	0.3906
89	0.91469	-0.089175
89	0.76407	-0.2691
89	1.9864	0.68634
89	0.45633	-0.78455
89	1.8315	0.60514
90	0.59668	-0.51637
90	2.3931	0.87258
90	2.5097	0.92018
90	0.52609	-0.64229
90	1.8309	0.6048
90	2.3567	0.85724
90	2.9225	1.0724
90	1.1855	0.17012
90	1.3216	0.27881
90	1.2915	0.25584
90	0.3688	-0.99749
91	2.1578	0.76911
91	0.83288	-0.18286
91	4.4115	1.4842
91	0.66719	-0.40468
91	1.431	0.35837
91	2.174	0.77655
91	2.8758	1.0563
91	2.7219	1.0013
91	1.8008	0.58824
91	1.3893	0.32881
92	0.7181	-0.33115
92	1.6068	0.47424
92	2.0019	0.69409
92	1.0461	0.045036
92	1.4166	0.34825
93	0.4512	-0.79585
93	0.80258	-0.21993
93	0.80734	-0.21401
93	2.6157	0.96153
93	2.2963	0.8313
93	2.696	0.99177
93	1.2025	0.18444
93	1.6084	0.47522
94	1.2913	0.25561
94	1.1862	0.17073
94	1.8819	0.63229
94	4.0703	1.4037
94	0.88891	-0.11776
94	1.7124	0.53788
95	2.1028	0.74326
95	0.80152	-0.22125
95	2.6435	0.97209
95	1.7607	0.5657
95	0.9573	-0.043643
96	1.4497	0.37135
96	1.9408	0.6631
97	2.1695	0.7745
97	2.9186	1.0711
97	4.02	1.3913
97	1.0445	0.043556
98	4.7126	1.5502
98	1.506	0.40943
98	0.79726	-0.22657
98	1.9427	0.66408
98	1.0646	0.06256
99	1.92	0.65231
99	1.4256	0.35461
99	1.2618	0.23255
99	1.8076	0.59202
101	3.7691	1.3268
101	2.2246	0.79956
