# Supplementary material for: Quantifying the Potential for Future Gene Therapy to Lower Lifetime Risk of Polygenic Late-Onset Diseases
Source: MDPI journal article supplement (doi:10.3390/ijms20133352), 2019-07-08
Supplement: s2 [file s2 › SuppFiles/Results/LODsCommonLow/LungCancer/DensityPostAnalysis.csv]

age	A..1..	A..2..	A..3..	A..4..	A..5..	A..6..	A..7..	A..8..	A..9..	A..10..	A..11..	A..12..	A..13..	A..14..	A..15..	A..16..	A..17..	A..18..	A..19..	A..20..
1	0.0000000e+00	0.0000000e+00	0.0000000e+00	0.0000000e+00	0.0000000e+00	0.0000000e+00	0.0000000e+00	0.0000000e+00	0.0000000e+00	0.0000000e+00	0.0000000e+00	0.0000000e+00	0.0000000e+00	0.0000000e+00	0.0000000e+00	0.0000000e+00	0.0000000e+00	0.0000000e+00	0.0000000e+00	0.0000000e+00
2	0.0000000e+00	0.0000000e+00	0.0000000e+00	0.0000000e+00	0.0000000e+00	0.0000000e+00	0.0000000e+00	0.0000000e+00	0.0000000e+00	0.0000000e+00	0.0000000e+00	0.0000000e+00	0.0000000e+00	0.0000000e+00	0.0000000e+00	0.0000000e+00	0.0000000e+00	0.0000000e+00	0.0000000e+00	0.0000000e+00
3	0.0000000e+00	0.0000000e+00	0.0000000e+00	0.0000000e+00	0.0000000e+00	0.0000000e+00	0.0000000e+00	0.0000000e+00	0.0000000e+00	0.0000000e+00	0.0000000e+00	0.0000000e+00	0.0000000e+00	0.0000000e+00	0.0000000e+00	0.0000000e+00	0.0000000e+00	0.0000000e+00	0.0000000e+00	0.0000000e+00
4	0.0000000e+00	0.0000000e+00	0.0000000e+00	0.0000000e+00	0.0000000e+00	0.0000000e+00	0.0000000e+00	0.0000000e+00	0.0000000e+00	0.0000000e+00	0.0000000e+00	0.0000000e+00	0.0000000e+00	0.0000000e+00	0.0000000e+00	0.0000000e+00	0.0000000e+00	0.0000000e+00	0.0000000e+00	0.0000000e+00
5	0.0000000e+00	0.0000000e+00	0.0000000e+00	0.0000000e+00	0.0000000e+00	0.0000000e+00	0.0000000e+00	0.0000000e+00	0.0000000e+00	0.0000000e+00	0.0000000e+00	0.0000000e+00	0.0000000e+00	0.0000000e+00	0.0000000e+00	0.0000000e+00	0.0000000e+00	0.0000000e+00	0.0000000e+00	0.0000000e+00
6	0.0000000e+00	0.0000000e+00	0.0000000e+00	0.0000000e+00	0.0000000e+00	0.0000000e+00	0.0000000e+00	0.0000000e+00	0.0000000e+00	0.0000000e+00	0.0000000e+00	0.0000000e+00	0.0000000e+00	0.0000000e+00	0.0000000e+00	0.0000000e+00	0.0000000e+00	0.0000000e+00	0.0000000e+00	0.0000000e+00
7	0.0000000e+00	0.0000000e+00	0.0000000e+00	0.0000000e+00	0.0000000e+00	0.0000000e+00	0.0000000e+00	0.0000000e+00	0.0000000e+00	0.0000000e+00	0.0000000e+00	0.0000000e+00	0.0000000e+00	0.0000000e+00	0.0000000e+00	0.0000000e+00	0.0000000e+00	0.0000000e+00	0.0000000e+00	0.0000000e+00
8	0.0000000e+00	0.0000000e+00	0.0000000e+00	0.0000000e+00	0.0000000e+00	0.0000000e+00	0.0000000e+00	0.0000000e+00	0.0000000e+00	0.0000000e+00	0.0000000e+00	0.0000000e+00	0.0000000e+00	0.0000000e+00	0.0000000e+00	0.0000000e+00	0.0000000e+00	0.0000000e+00	0.0000000e+00	0.0000000e+00
9	0.0000000e+00	0.0000000e+00	0.0000000e+00	0.0000000e+00	0.0000000e+00	0.0000000e+00	0.0000000e+00	0.0000000e+00	0.0000000e+00	0.0000000e+00	0.0000000e+00	0.0000000e+00	0.0000000e+00	0.0000000e+00	0.0000000e+00	0.0000000e+00	0.0000000e+00	0.0000000e+00	0.0000000e+00	0.0000000e+00
10	0.0000000e+00	0.0000000e+00	0.0000000e+00	0.0000000e+00	0.0000000e+00	0.0000000e+00	0.0000000e+00	0.0000000e+00	0.0000000e+00	0.0000000e+00	0.0000000e+00	0.0000000e+00	0.0000000e+00	0.0000000e+00	0.0000000e+00	0.0000000e+00	0.0000000e+00	0.0000000e+00	0.0000000e+00	0.0000000e+00
11	0.0000000e+00	0.0000000e+00	0.0000000e+00	0.0000000e+00	0.0000000e+00	0.0000000e+00	0.0000000e+00	0.0000000e+00	0.0000000e+00	0.0000000e+00	0.0000000e+00	0.0000000e+00	0.0000000e+00	0.0000000e+00	0.0000000e+00	0.0000000e+00	0.0000000e+00	0.0000000e+00	0.0000000e+00	0.0000000e+00
12	0.0000000e+00	0.0000000e+00	0.0000000e+00	0.0000000e+00	0.0000000e+00	0.0000000e+00	0.0000000e+00	0.0000000e+00	0.0000000e+00	0.0000000e+00	0.0000000e+00	0.0000000e+00	0.0000000e+00	0.0000000e+00	0.0000000e+00	0.0000000e+00	0.0000000e+00	0.0000000e+00	0.0000000e+00	0.0000000e+00
13	0.0000000e+00	0.0000000e+00	0.0000000e+00	0.0000000e+00	0.0000000e+00	0.0000000e+00	0.0000000e+00	0.0000000e+00	0.0000000e+00	0.0000000e+00	0.0000000e+00	0.0000000e+00	0.0000000e+00	0.0000000e+00	0.0000000e+00	0.0000000e+00	0.0000000e+00	0.0000000e+00	0.0000000e+00	0.0000000e+00
14	0.0000000e+00	0.0000000e+00	0.0000000e+00	0.0000000e+00	0.0000000e+00	0.0000000e+00	0.0000000e+00	0.0000000e+00	0.0000000e+00	0.0000000e+00	0.0000000e+00	0.0000000e+00	0.0000000e+00	0.0000000e+00	0.0000000e+00	0.0000000e+00	0.0000000e+00	0.0000000e+00	0.0000000e+00	0.0000000e+00
15	0.0000000e+00	0.0000000e+00	0.0000000e+00	0.0000000e+00	0.0000000e+00	0.0000000e+00	0.0000000e+00	0.0000000e+00	0.0000000e+00	0.0000000e+00	0.0000000e+00	0.0000000e+00	0.0000000e+00	0.0000000e+00	0.0000000e+00	0.0000000e+00	0.0000000e+00	0.0000000e+00	0.0000000e+00	0.0000000e+00
16	0.0000000e+00	0.0000000e+00	0.0000000e+00	0.0000000e+00	0.0000000e+00	0.0000000e+00	0.0000000e+00	0.0000000e+00	0.0000000e+00	0.0000000e+00	0.0000000e+00	0.0000000e+00	0.0000000e+00	0.0000000e+00	0.0000000e+00	0.0000000e+00	0.0000000e+00	0.0000000e+00	0.0000000e+00	0.0000000e+00
17	0.0000000e+00	0.0000000e+00	0.0000000e+00	0.0000000e+00	0.0000000e+00	0.0000000e+00	0.0000000e+00	0.0000000e+00	0.0000000e+00	0.0000000e+00	0.0000000e+00	0.0000000e+00	0.0000000e+00	0.0000000e+00	0.0000000e+00	0.0000000e+00	0.0000000e+00	0.0000000e+00	0.0000000e+00	0.0000000e+00
18	0.0000000e+00	0.0000000e+00	0.0000000e+00	0.0000000e+00	0.0000000e+00	0.0000000e+00	0.0000000e+00	0.0000000e+00	0.0000000e+00	0.0000000e+00	0.0000000e+00	0.0000000e+00	0.0000000e+00	0.0000000e+00	0.0000000e+00	0.0000000e+00	0.0000000e+00	0.0000000e+00	0.0000000e+00	0.0000000e+00
19	0.0000000e+00	0.0000000e+00	0.0000000e+00	0.0000000e+00	0.0000000e+00	0.0000000e+00	0.0000000e+00	0.0000000e+00	0.0000000e+00	0.0000000e+00	0.0000000e+00	0.0000000e+00	0.0000000e+00	0.0000000e+00	0.0000000e+00	0.0000000e+00	0.0000000e+00	0.0000000e+00	0.0000000e+00	0.0000000e+00
20	0.0000000e+00	0.0000000e+00	0.0000000e+00	0.0000000e+00	0.0000000e+00	0.0000000e+00	0.0000000e+00	0.0000000e+00	0.0000000e+00	0.0000000e+00	0.0000000e+00	0.0000000e+00	0.0000000e+00	0.0000000e+00	0.0000000e+00	0.0000000e+00	0.0000000e+00	0.0000000e+00	0.0000000e+00	0.0000000e+00
21	0.0000000e+00	0.0000000e+00	0.0000000e+00	0.0000000e+00	0.0000000e+00	0.0000000e+00	0.0000000e+00	0.0000000e+00	0.0000000e+00	0.0000000e+00	0.0000000e+00	0.0000000e+00	0.0000000e+00	0.0000000e+00	0.0000000e+00	0.0000000e+00	0.0000000e+00	0.0000000e+00	0.0000000e+00	0.0000000e+00
22	0.0000000e+00	0.0000000e+00	0.0000000e+00	0.0000000e+00	0.0000000e+00	0.0000000e+00	0.0000000e+00	0.0000000e+00	0.0000000e+00	0.0000000e+00	0.0000000e+00	0.0000000e+00	0.0000000e+00	0.0000000e+00	0.0000000e+00	0.0000000e+00	0.0000000e+00	0.0000000e+00	0.0000000e+00	0.0000000e+00
23	0.0000000e+00	0.0000000e+00	0.0000000e+00	0.0000000e+00	0.0000000e+00	0.0000000e+00	0.0000000e+00	0.0000000e+00	0.0000000e+00	0.0000000e+00	0.0000000e+00	0.0000000e+00	0.0000000e+00	0.0000000e+00	0.0000000e+00	0.0000000e+00	0.0000000e+00	0.0000000e+00	0.0000000e+00	0.0000000e+00
24	0.0000000e+00	0.0000000e+00	0.0000000e+00	0.0000000e+00	0.0000000e+00	0.0000000e+00	0.0000000e+00	0.0000000e+00	0.0000000e+00	0.0000000e+00	0.0000000e+00	0.0000000e+00	0.0000000e+00	0.0000000e+00	0.0000000e+00	0.0000000e+00	0.0000000e+00	0.0000000e+00	0.0000000e+00	0.0000000e+00
25	0.0000000e+00	0.0000000e+00	0.0000000e+00	0.0000000e+00	0.0000000e+00	0.0000000e+00	0.0000000e+00	0.0000000e+00	0.0000000e+00	0.0000000e+00	0.0000000e+00	0.0000000e+00	0.0000000e+00	0.0000000e+00	0.0000000e+00	0.0000000e+00	0.0000000e+00	0.0000000e+00	0.0000000e+00	0.0000000e+00
26	0.0000000e+00	0.0000000e+00	0.0000000e+00	0.0000000e+00	0.0000000e+00	0.0000000e+00	0.0000000e+00	0.0000000e+00	0.0000000e+00	0.0000000e+00	0.0000000e+00	0.0000000e+00	0.0000000e+00	0.0000000e+00	0.0000000e+00	0.0000000e+00	0.0000000e+00	0.0000000e+00	0.0000000e+00	0.0000000e+00
27	1.1347500e-05	1.1397108e-05	1.1427299e-05	1.1437555e-05	2.8373409e-06	2.8497449e-06	2.8572939e-06	2.8598583e-06	7.0934137e-07	7.1244239e-07	7.1432965e-07	7.1497074e-07	1.7733537e-07	1.7811062e-07	1.7858244e-07	1.7874271e-07	4.4333837e-08	4.4527651e-08	4.4645605e-08	4.4685673e-08
28	2.4567724e-05	2.4679850e-05	2.4755267e-05	2.4784360e-05	6.1441175e-06	6.1721590e-06	6.1910199e-06	6.1982957e-06	1.5360582e-06	1.5430687e-06	1.5477840e-06	1.5496030e-06	3.8401465e-07	3.8576728e-07	3.8694611e-07	3.8740085e-07	9.6003644e-08	9.6441801e-08	9.6736507e-08	9.6850194e-08
29	4.0124412e-05	4.0312821e-05	4.0452444e-05	4.0513274e-05	1.0036942e-05	1.0084072e-05	1.0118998e-05	1.0134214e-05	2.5093124e-06	2.5210952e-06	2.5298270e-06	2.5336312e-06	6.2732840e-07	6.3027410e-07	6.3245705e-07	6.3340810e-07	1.5683205e-07	1.5756847e-07	1.5811421e-07	1.5835197e-07
30	5.8422445e-05	5.8703896e-05	5.8928818e-05	5.9038602e-05	1.4618006e-05	1.4688429e-05	1.4744707e-05	1.4772176e-05	3.6546648e-06	3.6722712e-06	3.6863414e-06	3.6932090e-06	9.1366683e-07	9.1806843e-07	9.2158599e-07	9.2330289e-07	2.2841660e-07	2.2951700e-07	2.3039639e-07	2.3082561e-07
31	7.9687721e-05	8.0082583e-05	8.0413666e-05	8.0594441e-05	1.9945022e-05	2.0043852e-05	2.0126719e-05	2.0171965e-05	4.9865597e-06	5.0112687e-06	5.0319866e-06	5.0432989e-06	1.2466411e-06	1.2528184e-06	1.2579979e-06	1.2608259e-06	3.1166008e-07	3.1320439e-07	3.1449926e-07	3.1520627e-07
32	1.0451653e-04	1.0505045e-04	1.0550970e-04	1.0578920e-04	2.6168914e-05	2.6302598e-05	2.6417584e-05	2.6487565e-05	6.5427527e-06	6.5761763e-06	6.6049254e-06	6.6224218e-06	1.6356902e-06	1.6440461e-06	1.6512334e-06	1.6556075e-06	4.0892220e-07	4.1101118e-07	4.1280800e-07	4.1390153e-07
33	1.3346444e-04	1.3416678e-04	1.3477911e-04	1.3519097e-04	3.3431080e-05	3.3607007e-05	3.3760388e-05	3.3863553e-05	8.3586265e-06	8.4026128e-06	8.4409620e-06	8.4667558e-06	2.0896600e-06	2.1006566e-06	2.1102439e-06	2.1166923e-06	5.2241442e-07	5.2516356e-07	5.2756039e-07	5.2917250e-07
34	1.6747344e-04	1.6838490e-04	1.6917557e-04	1.6976151e-04	4.1970827e-05	4.2199249e-05	4.2397401e-05	4.2544244e-05	1.0494059e-05	1.0551171e-05	1.0600716e-05	1.0637431e-05	2.6235199e-06	2.6377982e-06	2.6501843e-06	2.6593632e-06	6.5587908e-07	6.5944863e-07	6.6254515e-07	6.6483987e-07
35	2.0767831e-04	2.0885036e-04	2.0985650e-04	2.1066056e-04	5.2077432e-05	5.2371337e-05	5.2623637e-05	5.2825263e-05	1.3021442e-05	1.3094930e-05	1.3158015e-05	1.3208429e-05	3.2553686e-06	3.2737406e-06	3.2895119e-06	3.3021156e-06	8.1384075e-07	8.1843375e-07	8.2237656e-07	8.2552748e-07
36	2.5367605e-04	2.5516153e-04	2.5642589e-04	2.5748602e-04	6.3654994e-05	6.4027748e-05	6.4345012e-05	6.4611032e-05	1.5916866e-05	1.6010072e-05	1.6089404e-05	1.6155922e-05	3.9792286e-06	4.0025303e-06	4.0223633e-06	4.0389928e-06	9.9480506e-07	1.0006305e-06	1.0055887e-06	1.0097461e-06
37	3.0788353e-04	3.0975838e-04	3.1134078e-04	3.1270187e-04	7.7319232e-05	7.7790066e-05	7.8187456e-05	7.8529267e-05	1.9334413e-05	1.9452150e-05	1.9551521e-05	1.9636994e-05	4.8336213e-06	4.8630556e-06	4.8878985e-06	4.9092669e-06	1.2084022e-06	1.2157608e-06	1.2219715e-06	1.2273136e-06
38	3.7140718e-04	3.7377131e-04	3.7573823e-04	3.7745309e-04	9.3359902e-05	9.3954169e-05	9.4448591e-05	9.4879651e-05	2.3346700e-05	2.3495309e-05	2.3618950e-05	2.3726746e-05	5.8367012e-06	5.8738537e-06	5.9047642e-06	5.9317133e-06	1.4591708e-06	1.4684589e-06	1.4761865e-06	1.4829237e-06
39	4.4485258e-04	4.4782123e-04	4.5025845e-04	4.5237269e-04	1.1194395e-04	1.1269098e-04	1.1330429e-04	1.1383633e-04	2.7995669e-05	2.8182493e-05	2.8335873e-05	2.8468928e-05	6.9989550e-06	7.0456614e-06	7.0840067e-06	7.1172705e-06	1.7497323e-06	1.7614088e-06	1.7709951e-06	1.7793110e-06
40	5.3115644e-04	5.3487908e-04	5.3789773e-04	5.4048905e-04	1.3383393e-04	1.3477191e-04	1.3553251e-04	1.3618544e-04	3.3472345e-05	3.3706937e-05	3.3897166e-05	3.4060466e-05	8.3681403e-06	8.4267888e-06	8.4743464e-06	8.5151716e-06	2.0920258e-06	2.1066878e-06	2.1185772e-06	2.1287834e-06
41	6.3079275e-04	6.3544571e-04	6.3916678e-04	6.4233393e-04	1.5917636e-04	1.6035050e-04	1.6128949e-04	1.6208870e-04	3.9813731e-05	4.0107413e-05	4.0342275e-05	4.0542176e-05	9.9535096e-06	1.0026930e-05	1.0085647e-05	1.0135622e-05	2.4883642e-06	2.5067193e-06	2.5213983e-06	2.5338921e-06
42	7.4794188e-04	7.5376652e-04	7.5835657e-04	7.6223063e-04	1.8907093e-04	1.9054333e-04	1.9170364e-04	1.9268296e-04	4.7295496e-05	4.7663812e-05	4.7954060e-05	4.8199033e-05	1.1823982e-05	1.1916062e-05	1.1988625e-05	1.2049869e-05	2.9559770e-06	2.9789968e-06	2.9971374e-06	3.0124482e-06
43	8.8354544e-04	8.9083274e-04	8.9650319e-04	9.0122093e-04	2.2380793e-04	2.2565386e-04	2.2709022e-04	2.2828525e-04	5.5990961e-05	5.6452763e-05	5.6812104e-05	5.7111071e-05	1.3997893e-05	1.4113344e-05	1.4203181e-05	1.4277923e-05	3.4994470e-06	3.5283097e-06	3.5507686e-06	3.5694541e-06
44	1.0397447e-03	1.0488612e-03	1.0558606e-03	1.0616070e-03	2.6399970e-04	2.6631445e-04	2.6809166e-04	2.6955072e-04	6.6054273e-05	6.6633438e-05	6.7078105e-05	6.7443171e-05	1.6513781e-05	1.6658574e-05	1.6769742e-05	1.6861010e-05	4.1284087e-06	4.1646066e-06	4.1923984e-06	4.2152151e-06
45	1.2217021e-03	1.2331621e-03	1.2418048e-03	1.2488130e-03	3.1106350e-04	3.1398138e-04	3.1618193e-04	3.1796634e-04	7.7841501e-05	7.8571681e-05	7.9122354e-05	7.9568890e-05	1.9460671e-05	1.9643219e-05	1.9780889e-05	1.9892525e-05	4.8651169e-06	4.9107534e-06	4.9451706e-06	4.9730793e-06
46	1.4315557e-03	1.4460241e-03	1.4566905e-03	1.4652207e-03	3.6567339e-04	3.6936916e-04	3.7209377e-04	3.7427269e-04	9.1523122e-05	9.2448124e-05	9.3130056e-05	9.3675411e-05	2.2881190e-05	2.3112445e-05	2.3282931e-05	2.3419272e-05	5.7202271e-06	5.7780401e-06	5.8206611e-06	5.8547459e-06
47	1.6723531e-03	1.6906544e-03	1.7038204e-03	1.7141958e-03	4.2877877e-04	4.3347108e-04	4.3684676e-04	4.3950693e-04	1.0733915e-04	1.0851381e-04	1.0935886e-04	1.1002480e-04	2.6835352e-05	2.7129023e-05	2.7340291e-05	2.7506780e-05	6.7087409e-06	6.7821575e-06	6.8349739e-06	6.8765954e-06
48	1.9518312e-03	1.9750527e-03	1.9913425e-03	2.0040180e-03	5.0262459e-04	5.0860445e-04	5.1279931e-04	5.1606345e-04	1.2585525e-04	1.2735258e-04	1.2840296e-04	1.2922029e-04	3.1464591e-05	3.1838933e-05	3.2101534e-05	3.2305871e-05	7.8660138e-06	7.9595978e-06	8.0252470e-06	8.0763303e-06
49	2.2710706e-03	2.3005871e-03	2.3207586e-03	2.3362458e-03	5.8778615e-04	5.9542544e-04	6.0064614e-04	6.0465445e-04	1.4721973e-04	1.4913311e-04	1.5044071e-04	1.5144465e-04	3.6806002e-05	3.7284360e-05	3.7611269e-05	3.7862262e-05	9.2013168e-06	9.3209037e-06	9.4026295e-06	9.4653763e-06
50	2.6352528e-03	2.6727625e-03	2.6978340e-03	2.7167419e-03	6.8601532e-04	6.9577994e-04	7.0230659e-04	7.0722874e-04	1.7187734e-04	1.7432381e-04	1.7595903e-04	1.7719225e-04	4.2970798e-05	4.3582437e-05	4.3991255e-05	4.4299569e-05	1.0742448e-05	1.0895354e-05	1.0997556e-05	1.1074633e-05
51	3.0501214e-03	3.0977545e-03	3.1290628e-03	3.1521439e-03	7.9935278e-04	8.1183611e-04	8.2004114e-04	8.2609007e-04	2.0034739e-04	2.0347618e-04	2.0553266e-04	2.0704875e-04	5.0088842e-05	5.0871070e-05	5.1385211e-05	5.1764248e-05	1.2521868e-05	1.2717419e-05	1.2845951e-05	1.2940708e-05
52	3.5187381e-03	3.5791759e-03	3.6183443e-03	3.6465224e-03	9.2927084e-04	9.4523197e-04	9.5557605e-04	9.6301765e-04	2.3300899e-04	2.3701115e-04	2.3960486e-04	2.4147080e-04	5.8254956e-05	5.9255542e-05	5.9904000e-05	6.0370506e-05	1.4563274e-05	1.4813412e-05	1.4975521e-05	1.5092144e-05
53	4.0483549e-03	4.1248223e-03	4.1738964e-03	4.2083218e-03	1.0786032e-03	1.0989764e-03	1.1120512e-03	1.1212232e-03	2.7058674e-04	2.7569772e-04	2.7897777e-04	2.8127872e-04	6.7650354e-05	6.8928168e-05	6.9748224e-05	7.0323494e-05	1.6911958e-05	1.7231399e-05	1.7436406e-05	1.7580218e-05
54	4.6396990e-03	4.7359388e-03	4.7974905e-03	4.8395549e-03	1.2486019e-03	1.2745012e-03	1.2910656e-03	1.3023856e-03	3.1341155e-04	3.1991255e-04	3.2407036e-04	3.2691181e-04	7.8357833e-05	7.9983186e-05	8.1022705e-05	8.1733113e-05	1.9588608e-05	1.9994929e-05	2.0254797e-05	2.0432391e-05
55	5.2996642e-03	5.4201677e-03	5.4973174e-03	5.5488841e-03	1.4425669e-03	1.4753680e-03	1.4963681e-03	1.5104045e-03	3.6233515e-04	3.7057391e-04	3.7584859e-04	3.7937418e-04	9.0590435e-05	9.2650275e-05	9.3969043e-05	9.4850504e-05	2.2646466e-05	2.3161400e-05	2.3491076e-05	2.3711430e-05
56	6.0283516e-03	6.1782345e-03	6.2747188e-03	6.3381359e-03	1.6621838e-03	1.7035107e-03	1.7301141e-03	1.7475999e-03	4.1780896e-04	4.2819694e-04	4.3488401e-04	4.3927927e-04	1.0446113e-04	1.0705834e-04	1.0873025e-04	1.0982916e-04	2.6113754e-05	2.6763020e-05	2.7180973e-05	2.7455685e-05
57	6.8294180e-03	7.0145063e-03	7.1349872e-03	7.2130685e-03	1.9105888e-03	1.9623688e-03	1.9960744e-03	2.0179183e-03	4.8065850e-04	4.9368513e-04	5.0216465e-04	5.0766005e-04	1.2017646e-04	1.2343344e-04	1.2555353e-04	1.2692752e-04	3.0042081e-05	3.0856270e-05	3.1386257e-05	3.1729730e-05
58	7.6971720e-03	7.9241848e-03	8.0738607e-03	8.1699176e-03	2.1884533e-03	2.2529974e-03	2.2955531e-03	2.3228640e-03	5.5109504e-04	5.6734849e-04	5.7806485e-04	5.8494224e-04	1.3778943e-04	1.4185325e-04	1.4453265e-04	1.4625219e-04	3.4444664e-05	3.5460541e-05	3.6130337e-05	3.6560189e-05
59	8.6311094e-03	8.9074921e-03	9.0922575e-03	9.2104270e-03	2.4984379e-03	2.5784421e-03	2.6319259e-03	2.6661323e-03	6.2984300e-04	6.5001163e-04	6.6349463e-04	6.7211788e-04	1.5748137e-04	1.6252419e-04	1.6589538e-04	1.6805147e-04	3.9366798e-05	4.0627389e-05	4.1470111e-05	4.2009086e-05
60	9.6218354e-03	9.9550556e-03	1.0181413e-02	1.0326334e-02	2.8406409e-03	2.9390170e-03	3.0058442e-03	3.0486289e-03	7.1698723e-04	7.4181770e-04	7.5868511e-04	7.6948410e-04	1.7927374e-04	1.8548228e-04	1.8969977e-04	1.9239992e-04	4.4813805e-05	4.6365782e-05	4.7420045e-05	4.8095014e-05
61	1.0667430e-02	1.1065759e-02	1.1340887e-02	1.1517995e-02	3.2180398e-03	3.3382035e-03	3.4212012e-03	3.4746294e-03	8.1335751e-04	8.4372879e-04	8.6470642e-04	8.7821037e-04	2.0337432e-04	2.1096845e-04	2.1621376e-04	2.1959033e-04	5.0837574e-05	5.2735881e-05	5.4047054e-05	5.4891096e-05
62	1.1750519e-02	1.2222442e-02	1.2553690e-02	1.2769312e-02	3.6283716e-03	3.7740939e-03	3.8763780e-03	3.9429585e-03	9.1845936e-04	9.5534644e-04	9.8123787e-04	9.9809158e-04	2.2965981e-04	2.3888338e-04	2.4535751e-04	2.4957176e-04	5.7407223e-05	5.9712806e-05	6.1331119e-05	6.2384541e-05
63	1.2861479e-02	1.3416328e-02	1.3812016e-02	1.4072904e-02	4.0721178e-03	4.2477905e-03	4.3730706e-03	4.4556713e-03	1.0325093e-03	1.0770521e-03	1.1088176e-03	1.1297615e-03	2.5818469e-04	2.6932288e-04	2.7726602e-04	2.8250315e-04	6.4536311e-05	6.7320431e-05	6.9305912e-05	7.0614997e-05
64	1.3978786e-02	1.4625808e-02	1.5094151e-02	1.5407245e-02	4.5447662e-03	4.7551252e-03	4.9073923e-03	5.0091849e-03	1.1544486e-03	1.2078834e-03	1.2465618e-03	1.2724189e-03	2.8868462e-04	3.0204667e-04	3.1171872e-04	3.1818461e-04	7.2158697e-05	7.5498633e-05	7.7916227e-05	7.9532420e-05
65	1.5087101e-02	1.5836559e-02	1.6385005e-02	1.6757567e-02	5.0434859e-03	5.2940231e-03	5.4773640e-03	5.6019080e-03	1.2836505e-03	1.3474164e-03	1.3940797e-03	1.4257782e-03	3.2100324e-04	3.3694921e-04	3.4861833e-04	3.5654519e-04	8.0235235e-05	8.4220954e-05	8.7137667e-05	8.9118998e-05
66	1.6167205e-02	1.7029416e-02	1.7665305e-02	1.8104518e-02	5.5628403e-03	5.8595115e-03	6.0783094e-03	6.2294344e-03	1.4188120e-03	1.4944785e-03	1.5502833e-03	1.5888280e-03	3.5481504e-04	3.7373764e-04	3.8769324e-04	3.9733246e-04	8.8684503e-05	9.3414126e-05	9.6902269e-05	9.9311550e-05
67	1.7201185e-02	1.8187519e-02	1.8917964e-02	1.9430672e-02	6.0967661e-03	6.4463610e-03	6.7052591e-03	6.8869824e-03	1.5584575e-03	1.6478210e-03	1.7140007e-03	1.7604529e-03	3.8975128e-04	4.1210002e-04	4.2865074e-04	4.4026787e-04	9.7414286e-05	1.0300012e-04	1.0713680e-04	1.1004038e-04
68	1.8166149e-02	1.9287730e-02	2.0119809e-02	2.0713203e-02	6.6349907e-03	7.0446359e-03	7.3485440e-03	7.5652746e-03	1.6999910e-03	1.8049486e-03	1.8828148e-03	1.9383446e-03	4.2516292e-04	4.5141253e-04	4.7088663e-04	4.8477449e-04	1.0626234e-04	1.1282299e-04	1.1769021e-04	1.2116125e-04
69	1.9044300e-02	2.0313826e-02	2.1254071e-02	2.1934662e-02	7.1677015e-03	7.6455128e-03	7.9993929e-03	8.2555469e-03	1.8409011e-03	1.9636187e-03	2.0545067e-03	2.1202955e-03	4.6042189e-04	4.9111440e-04	5.1384612e-04	5.3030034e-04	1.1507167e-04	1.2274255e-04	1.2842381e-04	1.3253615e-04
70	1.9823544e-02	2.1255074e-02	2.2310929e-02	2.3083594e-02	7.6863309e-03	8.2413887e-03	8.6507832e-03	8.9503742e-03	1.9789676e-03	2.1218760e-03	2.2272811e-03	2.3044155e-03	4.9497285e-04	5.3071664e-04	5.5708021e-04	5.7637283e-04	1.2370351e-04	1.3263659e-04	1.3922537e-04	1.4404698e-04
71	2.0488146e-02	2.2096959e-02	2.3275409e-02	2.4144528e-02	8.1784530e-03	8.8206587e-03	9.2910722e-03	9.6380068e-03	2.1109090e-03	2.2766663e-03	2.3980829e-03	2.4876288e-03	5.2799475e-04	5.6945507e-04	5.9982461e-04	6.2222244e-04	1.3195270e-04	1.4231417e-04	1.4990391e-04	1.5550142e-04
72	2.1026075e-02	2.2828800e-02	2.4137827e-02	2.5107248e-02	8.6322657e-03	9.3723754e-03	9.9097971e-03	1.0307793e-02	2.2335610e-03	2.4250612e-03	2.5641167e-03	2.6670965e-03	5.5869564e-04	6.0659686e-04	6.4137975e-04	6.6713878e-04	1.3962141e-04	1.5159222e-04	1.6028467e-04	1.6672201e-04
73	2.1433577e-02	2.3447828e-02	2.4895500e-02	2.5969501e-02	9.0399123e-03	9.8894513e-03	1.0500027e-02	1.0953002e-02	2.3447668e-03	2.5651197e-03	2.7234906e-03	2.8409829e-03	5.8653554e-04	6.4165608e-04	6.8127201e-04	7.1066233e-04	1.4657478e-04	1.6034936e-04	1.7024935e-04	1.7759397e-04
74	2.1701158e-02	2.3942203e-02	2.5538232e-02	2.6720294e-02	9.3881361e-03	1.0357635e-02	1.1048092e-02	1.1559464e-02	2.4408714e-03	2.6929364e-03	2.8724522e-03	3.0054065e-03	6.1059929e-04	6.7365494e-04	7.1856194e-04	7.5182129e-04	1.5258425e-04	1.6834139e-04	1.7956332e-04	1.8787458e-04
75	2.1833089e-02	2.4314160e-02	2.6069974e-02	2.7365011e-02	9.6727242e-03	1.0771914e-02	1.1549793e-02	1.2123534e-02	2.5206137e-03	2.8070515e-03	3.0097589e-03	3.1592700e-03	6.3057079e-04	7.0222767e-04	7.5293807e-04	7.9034059e-04	1.5757095e-04	1.7547702e-04	1.8814885e-04	1.9749522e-04
76	2.1832581e-02	2.4564563e-02	2.6493473e-02	2.7906393e-02	9.8892337e-03	1.1126705e-02	1.2000420e-02	1.2640413e-02	2.5826601e-03	2.9058367e-03	3.1340149e-03	3.3011547e-03	6.4611565e-04	7.2696618e-04	7.8405055e-04	8.2586466e-04	1.6145145e-04	1.8165438e-04	1.9591863e-04	2.0636715e-04
77	2.1697069e-02	2.4690513e-02	2.6807418e-02	2.8344584e-02	1.0030377e-02	1.1414221e-02	1.2392849e-02	1.3103468e-02	2.6249093e-03	2.9870558e-03	3.2431588e-03	3.4291249e-03	6.5670738e-04	7.4731024e-04	8.1138282e-04	8.5790835e-04	1.6409432e-04	1.8673365e-04	2.0274374e-04	2.1436928e-04
78	2.1427864e-02	2.4694191e-02	2.7014864e-02	2.8682765e-02	1.0092350e-02	1.1630763e-02	1.2723781e-02	1.3509349e-02	2.6462008e-03	3.0495708e-03	3.3361587e-03	3.5421336e-03	6.6205497e-04	7.6297442e-04	8.3467606e-04	8.8620907e-04	1.6542697e-04	1.9064360e-04	2.0855961e-04	2.2143611e-04
79	2.1029709e-02	2.4581131e-02	2.7119587e-02	2.8927426e-02	1.0074227e-02	1.1775526e-02	1.2991567e-02	1.3857607e-02	2.6461556e-03	3.0930290e-03	3.4124414e-03	3.6399206e-03	6.6206301e-04	7.7386986e-04	8.5378622e-04	9.1070108e-04	1.6542565e-04	1.9336215e-04	2.1333036e-04	2.2755133e-04
80	2.0508654e-02	2.4357587e-02	2.7125538e-02	2.9084371e-02	9.9766581e-03	1.1849013e-02	1.3195513e-02	1.4148409e-02	2.6248319e-03	3.1174436e-03	3.4717040e-03	3.7224083e-03	6.5674557e-04	7.7999938e-04	8.6863704e-04	9.3136447e-04	1.6409397e-04	1.9489008e-04	2.1703702e-04	2.3271005e-04
81	1.9869447e-02	2.4027782e-02	2.7034456e-02	2.9157313e-02	9.7999597e-03	1.1850923e-02	1.3333868e-02	1.4380898e-02	2.5822085e-03	3.1226206e-03	3.5133641e-03	3.7892479e-03	6.4609694e-04	7.8131397e-04	8.7908231e-04	9.4811146e-04	1.6143057e-04	1.9521523e-04	2.1964314e-04	2.3689042e-04
82	1.9115387e-02	2.3593440e-02	2.6848517e-02	2.9150444e-02	9.5453314e-03	1.1781462e-02	1.3406895e-02	1.4556370e-02	2.5185450e-03	3.1085501e-03	3.5374223e-03	3.8407124e-03	6.3018178e-04	7.7781087e-04	8.8512182e-04	9.6101003e-04	1.5745165e-04	1.9433696e-04	2.2114872e-04	2.4010948e-04
83	1.8251625e-02	2.3055663e-02	2.6570122e-02	2.9067088e-02	9.2151841e-03	1.1640727e-02	1.3415165e-02	1.4675875e-02	2.4344337e-03	3.0752047e-03	3.5439694e-03	3.8770191e-03	6.0914814e-04	7.6948296e-04	8.8677805e-04	9.7011431e-04	1.5219425e-04	1.9225353e-04	2.2155943e-04	2.4238080e-04
84	1.7290668e-02	2.2419883e-02	2.6206073e-02	2.8912334e-02	8.8170532e-03	1.1432601e-02	1.3363298e-02	1.4743305e-02	2.3318687e-03	3.0236093e-03	3.5342257e-03	3.8991998e-03	5.8349497e-04	7.5658669e-04	8.8435636e-04	9.7568249e-04	1.4578300e-04	1.8902902e-04	2.2095156e-04	2.4376889e-04
85	1.6241519e-02	2.1685054e-02	2.5754766e-02	2.8681489e-02	8.3541132e-03	1.1154092e-02	1.3247421e-02	1.4752833e-02	2.2116190e-03	2.9528690e-03	3.5070446e-03	3.9055785e-03	5.5341437e-04	7.3889769e-04	8.7756928e-04	9.7729460e-04	1.3826598e-04	1.8460744e-04	2.1925338e-04	2.4416892e-04
86	1.5122339e-02	2.0862752e-02	2.5228969e-02	2.8385951e-02	7.8398982e-03	1.0815910e-02	1.3079495e-02	1.4716174e-02	2.0773708e-03	2.8659371e-03	3.4657287e-03	3.8994065e-03	5.1982919e-04	7.1715545e-04	8.6724381e-04	9.7576482e-04	1.2987366e-04	1.7917347e-04	2.1667141e-04	2.4378420e-04
87	1.3941412e-02	1.9948249e-02	2.4621411e-02	2.8018313e-02	7.2779725e-03	1.0413781e-02	1.2853358e-02	1.4626675e-02	1.9300289e-03	2.7616066e-03	3.4085524e-03	3.8788146e-03	4.8296566e-04	6.9105763e-04	8.5294776e-04	9.7062499e-04	1.2066260e-04	1.7265163e-04	2.1309774e-04	2.4249784e-04
88	1.2712359e-02	1.8946074e-02	2.3932900e-02	2.7581078e-02	6.6774722e-03	9.9518811e-03	1.2571331e-02	1.4487625e-02	1.7720634e-03	2.6410240e-03	3.3361720e-03	3.8447168e-03	4.4344210e-04	6.6089126e-04	8.3484546e-04	9.6210399e-04	1.1078724e-04	1.6511360e-04	2.0857340e-04	2.4036700e-04
89	1.1450474e-02	1.7866059e-02	2.3165962e-02	2.7078148e-02	6.0482213e-03	9.4369785e-03	1.2236425e-02	1.4302869e-02	1.6061260e-03	2.5060221e-03	3.2494247e-03	3.7981760e-03	4.0192220e-04	6.2711514e-04	8.1314662e-04	9.5046793e-04	1.0041338e-04	1.5667398e-04	2.0315076e-04	2.3745813e-04
90	1.0172429e-02	1.6717561e-02	2.2320648e-02	2.6509645e-02	5.3997322e-03	8.8740221e-03	1.1848255e-02	1.4071859e-02	1.4347559e-03	2.3579051e-03	3.1481846e-03	3.7390157e-03	3.5904149e-04	5.9005558e-04	7.8781962e-04	9.3567257e-04	8.9699767e-05	1.4741429e-04	1.9682192e-04	2.3376020e-04
91	8.9000455e-03	1.5512323e-02	2.1400773e-02	2.5879589e-02	4.7454664e-03	8.2711044e-03	1.1410801e-02	1.3798887e-02	1.2615823e-03	2.1988733e-03	3.0335617e-03	3.6684343e-03	3.1570833e-04	5.5026342e-04	7.5914246e-04	9.1801799e-04	7.8873313e-05	1.3747214e-04	1.8965632e-04	2.2934814e-04
92	7.6564252e-03	1.4259739e-02	2.0403731e-02	2.5183596e-02	4.0987983e-03	7.6338229e-03	1.0922954e-02	1.3481812e-02	1.0901892e-03	2.0304271e-03	2.9052627e-03	3.5858620e-03	2.7281974e-04	5.0811419e-04	7.2704171e-04	8.9736163e-04	6.8158094e-05	1.2694131e-04	1.8163560e-04	2.2418634e-04
93	6.4656952e-03	1.2970037e-02	1.9330110e-02	2.4418017e-02	3.4737939e-03	6.9683515e-03	1.0385398e-02	1.3118954e-02	9.2435033e-04	1.8542257e-03	2.7634760e-03	3.4908547e-03	2.3132024e-04	4.6402314e-04	6.9156455e-04	8.7359232e-04	5.7790059e-05	1.1592554e-04	1.7277155e-04	2.1824702e-04
94	5.3511759e-03	1.1657180e-02	1.8188579e-02	2.3584157e-02	2.8844748e-03	6.2836359e-03	9.8042935e-03	1.2712702e-02	7.6784156e-04	1.6726916e-03	2.6098838e-03	3.3840966e-03	1.9215492e-04	4.1859669e-04	6.5313217e-04	8.4688152e-04	4.8005285e-05	1.0457631e-04	1.6316936e-04	2.1157297e-04
95	4.3335684e-03	1.0337522e-02	1.6988878e-02	2.2682900e-02	2.3430609e-03	5.5892606e-03	9.1854965e-03	1.2264123e-02	6.2394783e-04	1.4883979e-03	2.4460613e-03	3.2658874e-03	1.5614599e-04	3.7247885e-04	6.1213878e-04	8.1730427e-04	3.9009155e-05	9.3054486e-05	1.5292750e-04	2.0418295e-04
96	3.4276296e-03	9.0298601e-03	1.5738583e-02	2.1712921e-02	1.8583015e-03	4.8955705e-03	8.5327282e-03	1.1771737e-02	4.9502220e-04	1.3041028e-03	2.2729842e-03	3.1358051e-03	1.2388241e-04	3.2635989e-04	5.6882855e-04	7.8475487e-04	3.0948791e-05	8.1532515e-05	1.4210699e-04	1.9605055e-04
97	2.6466923e-03	7.7572262e-03	1.4447476e-02	2.0672357e-02	1.4384987e-03	4.2161154e-03	7.8523206e-03	1.1235594e-02	3.8330986e-04	1.1234480e-03	2.0923702e-03	2.9938948e-03	9.5926179e-05	2.8115134e-04	5.2363140e-04	7.4924472e-04	2.3964573e-05	7.0238090e-05	1.3081520e-04	1.8717862e-04
98	1.9951843e-03	6.5437791e-03	1.3126672e-02	1.9563553e-02	1.0870278e-03	3.5652196e-03	7.1517495e-03	1.0658728e-02	2.8974076e-04	9.5028793e-04	1.9062560e-03	2.8410201e-03	7.2510166e-05	2.3781789e-04	4.7705727e-04	7.1099019e-04	1.8114651e-05	5.9412193e-05	1.1917951e-04	1.7762115e-04
99	1.4684025e-03	5.4105847e-03	1.1786598e-02	7.4331042e-03	8.0181302e-04	2.9544197e-03	6.4360063e-03	1.0042035e-02	2.1377693e-04	7.8769835e-04	1.7159483e-03	2.6773768e-03	5.3499796e-05	1.9712932e-04	4.2943307e-04	6.7004007e-04	1.3365396e-05	4.9247130e-05	1.0728159e-04	1.6739037e-04
100	1.0562356e-03	4.3775755e-03	1.0442498e-02	0.0000000e+00	5.7790582e-04	2.3951345e-03	5.7134795e-03	9.3896403e-03	1.5411729e-04	6.3874014e-04	1.5236843e-03	2.5040515e-03	3.8569538e-05	1.5985170e-04	3.8131865e-04	6.2666628e-04	9.6354704e-06	3.9934271e-05	9.5261305e-05	1.5655423e-04
101	7.4322214e-04	3.4599720e-03	9.1150641e-03	0.0000000e+00	4.0743320e-04	1.8967511e-03	4.9968637e-03	8.7092769e-03	1.0868115e-04	5.0595067e-04	1.3328931e-03	2.3231643e-03	2.7198754e-05	1.2662019e-04	3.3357240e-04	5.8139957e-04	6.7947943e-06	3.1632263e-05	8.3333074e-05	1.4524527e-04
102	5.1099066e-04	2.6702273e-03	7.8262052e-03	0.0000000e+00	2.8065757e-04	1.4666012e-03	4.2984812e-03	8.0057231e-03	7.4881823e-05	3.9130165e-04	1.1468713e-03	2.1359949e-03	1.8740143e-05	9.7928288e-05	2.8701934e-04	5.3456030e-04	4.6816509e-06	2.4464384e-05	7.1702995e-05	1.3354352e-04
103	3.4231665e-04	2.0117804e-03	6.5982109e-03	0.0000000e+00	1.8835058e-04	1.1069283e-03	3.6304890e-03	7.2826783e-03	5.0264614e-05	2.9540300e-04	9.6885886e-04	1.9435088e-03	1.2579415e-05	7.3928686e-05	2.4247033e-04	4.8638996e-04	3.1425736e-06	1.8468772e-05	6.0573634e-05	1.2150933e-04
104	2.2295496e-04	1.4797844e-03	5.4525235e-03	0.0000000e+00	1.2287114e-04	8.1551358e-04	3.0049018e-03	6.5459782e-03	3.2796774e-05	2.1767696e-04	8.0206867e-04	1.7472531e-03	8.2078735e-06	5.4476849e-05	2.0072944e-04	4.3727569e-04	2.0504760e-06	1.3609307e-05	5.0145863e-05	1.0923942e-04
105	1.4090533e-04	1.0640848e-03	4.4101064e-03	0.0000000e+00	7.7781546e-05	5.8738843e-04	2.4344352e-03	5.8072296e-03	2.0765704e-05	1.5681784e-04	6.4993259e-04	1.5503833e-03	5.1969396e-06	3.9246098e-05	1.6265571e-04	3.8800747e-04	1.2982869e-06	9.8043658e-06	4.0634259e-05	9.6931093e-05
106	8.6117591e-05	7.4853103e-04	3.4846868e-03	0.0000000e+00	4.7615218e-05	4.1386978e-04	1.9267158e-03	5.0758035e-03	1.2714621e-05	1.1051503e-04	5.1448805e-04	1.3553843e-03	3.1820418e-06	2.7658194e-05	1.2875905e-04	3.3920708e-04	7.9492818e-07	6.9094874e-06	3.2166201e-05	8.4739699e-05
107	5.0616394e-05	5.1443962e-04	2.6882501e-03	0.0000000e+00	2.8027084e-05	2.8485322e-04	1.4885259e-03	4.3627407e-03	7.4853876e-06	7.6077723e-05	3.9755093e-04	1.1651874e-03	1.8733464e-06	1.9039752e-05	9.9493923e-05	2.9160808e-04	4.6799282e-07	4.7564441e-06	2.4855223e-05	7.2848510e-05
108	2.8710324e-05	3.4452389e-04	2.0247522e-03	0.0000000e+00	1.5920363e-05	1.9104435e-04	1.1227595e-03	3.6824120e-03	4.2527282e-06	5.1032738e-05	2.9991723e-04	9.8366460e-04	1.0643212e-06	1.2771855e-05	7.5059646e-05	2.4617964e-04	2.6588444e-07	3.1906133e-06	1.8751099e-05	6.1499607e-05
109	1.5433186e-05	2.2435993e-04	1.4891095e-03	0.0000000e+00	8.5703207e-06	1.2459104e-04	8.2692882e-04	3.0469633e-03	2.2897600e-06	3.3287386e-05	2.2093322e-04	8.1406692e-04	5.7305507e-07	8.3307881e-06	5.5292651e-05	2.0373541e-04	1.4315802e-07	2.0811597e-06	1.3812959e-05	5.0896254e-05
110	7.9185850e-06	1.4176198e-04	1.0705541e-03	0.0000000e+00	4.4035021e-06	7.8833428e-05	5.9533201e-04	2.4673574e-03	1.1767041e-06	2.1065873e-05	1.5908465e-04	6.5932740e-04	2.9449297e-07	5.2721425e-06	3.9814014e-05	1.6500944e-04	7.3568750e-08	1.3170601e-06	9.9461361e-06	4.1221826e-05
111	3.8670002e-06	8.6620804e-05	7.5290493e-04	0.0000000e+00	2.1533460e-06	4.8234951e-05	4.1925648e-04	1.9517929e-03	5.7551500e-07	1.2891536e-05	1.1205277e-04	5.2164680e-04	1.4403418e-07	3.2263655e-06	2.8043454e-05	1.3055258e-04	3.5981821e-08	8.0599279e-07	7.0056606e-06	3.2613923e-05
112	1.7421228e-06	5.0908698e-05	5.1741046e-04	0.0000000e+00	9.7145592e-07	2.8388101e-05	2.8852241e-04	1.5076996e-03	2.5968195e-07	7.5884837e-06	7.7125539e-05	4.0302639e-04	6.4990808e-08	1.8991758e-06	1.9302270e-05	1.0086573e-04	1.6235612e-08	4.7444065e-07	4.8219766e-06	2.5197669e-05
113	7.7515415e-07	2.8874492e-05	3.4649390e-04	0.0000000e+00	4.3285098e-07	1.6123699e-05	1.9348439e-04	1.1370995e-03	1.1572660e-07	4.3108158e-06	5.1729790e-05	3.0401378e-04	2.8963073e-08	1.0788745e-06	1.2946494e-05	7.6085993e-05	7.2353656e-09	2.6951737e-07	3.2342084e-06	1.9007305e-05
114	1.9399126e-07	1.5519301e-05	2.2561183e-04	0.0000000e+00	1.0846592e-07	8.6772734e-06	1.2614586e-04	8.3724842e-04	2.9004050e-08	2.3203240e-06	3.3731710e-05	2.2388226e-04	7.2589077e-09	5.8071261e-07	8.4421096e-06	5.6031508e-05	1.8133695e-09	1.4506956e-07	2.1089487e-06	1.3997399e-05
115	0.0000000e+00	7.9618604e-06	1.4253672e-04	0.0000000e+00	0.0000000e+00	4.4573934e-06	7.9798213e-05	6.0261784e-04	0.0000000e+00	1.1921098e-06	2.1341674e-05	1.6116744e-04	0.0000000e+00	2.9835277e-07	5.3412423e-06	4.0335839e-05	0.0000000e+00	7.4532261e-08	1.3343093e-06	1.0076398e-05
116	0.0000000e+00	3.8878459e-06	8.7087748e-05	0.0000000e+00	0.0000000e+00	2.1793740e-06	4.8817977e-05	4.2432411e-04	0.0000000e+00	5.8295800e-07	1.3058259e-05	1.1350192e-04	0.0000000e+00	1.4589897e-07	3.2681370e-06	2.8406530e-05	0.0000000e+00	3.6447325e-08	8.1642007e-07	7.0962941e-06
117	0.0000000e+00	1.7513494e-06	5.1178321e-05	0.0000000e+00	0.0000000e+00	9.8300722e-07	2.8725655e-05	2.9195314e-04	0.0000000e+00	2.6298630e-07	7.6850441e-06	7.8106931e-05	0.0000000e+00	6.5818698e-08	1.9233686e-06	1.9548153e-05	0.0000000e+00	1.6442274e-08	4.8047979e-07	4.8833554e-06
118	0.0000000e+00	7.7921387e-07	2.9025717e-05	0.0000000e+00	0.0000000e+00	4.3794748e-07	1.6313543e-05	1.9576252e-04	0.0000000e+00	1.1718500e-07	4.3651413e-06	5.2381695e-05	0.0000000e+00	2.9328471e-08	1.0924855e-06	1.3109826e-05	0.0000000e+00	7.3265778e-09	2.7291502e-07	3.2749803e-06
119	0.0000000e+00	1.9500160e-07	1.5600128e-05	0.0000000e+00	0.0000000e+00	1.0973753e-07	8.7790027e-06	1.2762475e-04	0.0000000e+00	2.9368050e-08	2.3494440e-06	3.4155042e-05	0.0000000e+00	7.3501072e-09	5.8800857e-07	8.5481747e-06	0.0000000e+00	1.8361350e-09	1.4689080e-07	2.1354251e-06
120	0.0000000e+00	0.0000000e+00	8.0029460e-06	0.0000000e+00	0.0000000e+00	0.0000000e+00	4.5092339e-06	8.0726285e-05	0.0000000e+00	0.0000000e+00	1.2069539e-06	2.1607419e-05	0.0000000e+00	0.0000000e+00	3.0207194e-07	5.4078245e-06	0.0000000e+00	0.0000000e+00	7.5460651e-08	1.3509297e-06
