# Supplementary material for: Quantifying the Potential for Future Gene Therapy to Lower Lifetime Risk of Polygenic Late-Onset Diseases
Source: MDPI journal article supplement (doi:10.3390/ijms20133352), 2019-07-08
Supplement: s2 [file s2 › SuppFiles/Results/LODsCommonLow/LungCancer/EnvironmentArraySD.csv]

Age	Env	EnvSD	Incidence	CasesExpected
0	0	0	-4.91591e-06	0
1	0	0	-4.89989e-06	0
2	0	0	-4.88108e-06	0
3	0	0	-4.85903e-06	0
4	0	0	-4.83315e-06	0
5	0	0	-4.8028e-06	0
6	0	0	-4.76719e-06	0
7	0	0	-4.72542e-06	0
8	0	0	-4.67642e-06	0
9	0	0	-4.61893e-06	0
10	0	0	-4.5515e-06	0
11	0	0	-4.47239e-06	0
12	0	0	-4.3796e-06	0
13	0	0	-4.27074e-06	0
14	0	0	-4.14304e-06	0
15	0	0	-3.99324e-06	0
16	0	0	-3.81752e-06	0
17	0	0	-3.61139e-06	0
18	0	0	-3.3696e-06	0
19	0	0	-3.08598e-06	0
20	0	0	-2.75328e-06	0
21	0	0	-2.36304e-06	0
22	0	0	-1.90531e-06	0
23	0	0	-1.36843e-06	0
24	0	0	-7.38718e-07	0
25	0	0	-1.60354e-10	0
26	7.2033e-07	8.596e-09	8.66027e-07	21
27	1.56136e-06	1.285e-08	1.88185e-06	47
28	2.55315e-06	1.295e-08	3.07311e-06	76
29	3.72228e-06	2.287e-08	4.47001e-06	111
30	5.08415e-06	2.256e-08	6.10793e-06	152
31	6.67805e-06	1.894e-08	8.02829e-06	200
32	8.54102e-06	2.415e-08	1.02796e-05	256
33	1.07355e-05	1.799e-08	1.29185e-05	322
34	1.33372e-05	2.667e-08	1.60114e-05	400
35	1.63234e-05	3.481e-08	1.96358e-05	490
36	1.98544e-05	2.096e-08	2.38823e-05	597
37	2.4008e-05	3.77e-08	2.88564e-05	721
38	2.88309e-05	3.944e-08	3.46815e-05	866
39	3.45243e-05	3.988e-08	4.1501e-05	1037
40	4.11318e-05	5.06e-08	4.9482e-05	1236
41	4.89457e-05	5.966e-08	5.88183e-05	1470
42	5.80518e-05	5.078e-08	6.97349e-05	1742
43	6.86214e-05	6.923e-08	8.24921e-05	2061
44	8.1041e-05	8.355e-08	9.73905e-05	2433
45	9.55087e-05	7.462e-08	0.000114776	2867
46	0.0001123	3.593e-08	0.000135046	3373
47	0.00013204	9.821e-08	0.000158654	3963
48	0.000154929	1.013e-07	0.000186117	4648
49	0.000181489	1.51e-07	0.000218018	5444
50	0.000212337	1.7e-07	0.000255015	6366
51	0.000247965	1.906e-07	0.00029784	7433
52	0.000289246	1.163e-07	0.000347301	8665
53	0.000336665	1.573e-07	0.000404282	10084
54	0.000391297	1.769e-07	0.000469735	11711
55	0.000453822	1.321e-07	0.000544666	13573
56	0.000525373	1.645e-07	0.000630119	15694
57	0.000606472	1.554e-07	0.000727143	18100
58	0.000698239	3.139e-07	0.000836758	20813
59	0.000801112	2.515e-07	0.000959904	23856
60	0.000916454	4.174e-07	0.00109738	27247
61	0.00104422	3.684e-07	0.00124977	30996
62	0.00118528	3.769e-07	0.00141738	35109
63	0.00133905	3.783e-07	0.00160016	39581
64	0.00150551	4.193e-07	0.00179761	44394
65	0.00168391	2.512e-07	0.00200878	49520
66	0.00187345	5.699e-07	0.00223218	54916
67	0.00207201	5.828e-07	0.00246583	60529
68	0.00227761	5.011e-07	0.0027073	66293
69	0.00248861	4.788e-07	0.00295379	72133
70	0.00270205	2.635e-07	0.00320225	77969
71	0.00291521	3.555e-07	0.00344953	83721
72	0.00312646	1.061e-06	0.00369254	89310
73	0.00333177	7.267e-07	0.00392841	94664
74	0.00352995	5.027e-07	0.00415459	99721
75	0.00371959	5.897e-07	0.004369	104432
76	0.00389866	6.159e-07	0.00457002	108760
77	0.00406623	4.665e-07	0.00475656	112683
78	0.00422196	1.046e-06	0.00492801	116190
79	0.00436577	5.694e-07	0.00508423	119282
80	0.00449725	6.526e-07	0.00522541	121971
81	0.00461699	4.617e-07	0.0053521	124275
82	0.00472545	5.094e-07	0.00546504	126218
83	0.00482419	5.089e-07	0.00556515	127828
84	0.00491138	7.958e-07	0.00565342	129133
85	0.0049914	5.598e-07	0.0057309	130163
86	0.00506257	9.899e-07	0.00579864	130947
87	0.00512646	5.17e-07	0.00585767	131513
88	0.00518448	1.077e-06	0.00590894	131886
89	0.00523624	9.866e-07	0.00595336	132092
90	0.00528334	1.889e-06	0.00599175	132152
91	0.00532592	1.656e-06	0.00602487	132086
92	0.00536415	1.598e-06	0.00605339	131912
93	0.00539935	1.321e-06	0.00607792	131645
94	0.00543201	1.524e-06	0.00609899	131298
95	0.00546141	1.453e-06	0.00611706	130884
96	0.0054884	1.264e-06	0.00613255	130413
97	0.00551467	1.267e-06	0.00614582	129893
98	0.00553898	9.928e-07	0.00615717	129333
99	0.00556079	1.105e-06	0.00616688	128739
100	0.00558198	9.9e-07	0.00617519	128118
101	0.00560283	8.963e-07	0.00618228	127474
102	0.00562244	1.078e-06	0.00618834	126810
103	0.00564003	1.404e-06	0.00619352	126131
104	0.00565823	9.57e-07	0.00619794	125439
105	0.00567617	7.152e-07	0.00620171	124737
106	0.00569231	9.875e-07	0.00620493	124027
107	0.00570836	9.284e-07	0.00620768	123313
108	0.0057244	1.303e-06	0.00621002	122593
109	0.00574002	1.224e-06	0.00621202	121870
110	0.00575515	1.021e-06	0.00621372	121146
111	0.00577071	8.65e-07	0.00621518	120421
112	0.00578633	9.269e-07	0.00621642	119696
113	0.00580081	9.54e-07	0.00621748	118972
114	0.00581517	8.29e-07	0.00621838	118250
115	0.00582958	9.924e-07	0.00621915	117529
116	0.00584414	1.073e-06	0.0062198	116810
117	0.00585925	8.956e-07	0.00622036	116094
118	0.00587361	1.201e-06	0.00622084	115381
119	0.00588758	1.107e-06	0.00622124	114671
