# Supplementary material for: Quantifying the Potential for Future Gene Therapy to Lower Lifetime Risk of Polygenic Late-Onset Diseases
Source: MDPI journal article supplement (doi:10.3390/ijms20133352), 2019-07-08
Supplement: s2 [file s2 › SuppFiles/Results/LODsCommonLow/LungCancer/LifetimeRiskPostAnalysis.csv]

age	A..1..	A..2..	A..3..	A..4..	A..5..	A..6..	A..7..	A..8..	A..9..	A..10..	A..11..	A..12..	A..13..	A..14..	A..15..	A..16..	A..17..	A..18..	A..19..	A..20..
1	0.0000000e+00	0.0000000e+00	0.0000000e+00	0.0000000e+00	0.0000000e+00	0.0000000e+00	0.0000000e+00	0.0000000e+00	0.0000000e+00	0.0000000e+00	0.0000000e+00	0.0000000e+00	0.0000000e+00	0.0000000e+00	0.0000000e+00	0.0000000e+00	0.0000000e+00	0.0000000e+00	0.0000000e+00	0.0000000e+00
2	0.0000000e+00	0.0000000e+00	0.0000000e+00	0.0000000e+00	0.0000000e+00	0.0000000e+00	0.0000000e+00	0.0000000e+00	0.0000000e+00	0.0000000e+00	0.0000000e+00	0.0000000e+00	0.0000000e+00	0.0000000e+00	0.0000000e+00	0.0000000e+00	0.0000000e+00	0.0000000e+00	0.0000000e+00	0.0000000e+00
3	0.0000000e+00	0.0000000e+00	0.0000000e+00	0.0000000e+00	0.0000000e+00	0.0000000e+00	0.0000000e+00	0.0000000e+00	0.0000000e+00	0.0000000e+00	0.0000000e+00	0.0000000e+00	0.0000000e+00	0.0000000e+00	0.0000000e+00	0.0000000e+00	0.0000000e+00	0.0000000e+00	0.0000000e+00	0.0000000e+00
4	0.0000000e+00	0.0000000e+00	0.0000000e+00	0.0000000e+00	0.0000000e+00	0.0000000e+00	0.0000000e+00	0.0000000e+00	0.0000000e+00	0.0000000e+00	0.0000000e+00	0.0000000e+00	0.0000000e+00	0.0000000e+00	0.0000000e+00	0.0000000e+00	0.0000000e+00	0.0000000e+00	0.0000000e+00	0.0000000e+00
5	0.0000000e+00	0.0000000e+00	0.0000000e+00	0.0000000e+00	0.0000000e+00	0.0000000e+00	0.0000000e+00	0.0000000e+00	0.0000000e+00	0.0000000e+00	0.0000000e+00	0.0000000e+00	0.0000000e+00	0.0000000e+00	0.0000000e+00	0.0000000e+00	0.0000000e+00	0.0000000e+00	0.0000000e+00	0.0000000e+00
6	0.0000000e+00	0.0000000e+00	0.0000000e+00	0.0000000e+00	0.0000000e+00	0.0000000e+00	0.0000000e+00	0.0000000e+00	0.0000000e+00	0.0000000e+00	0.0000000e+00	0.0000000e+00	0.0000000e+00	0.0000000e+00	0.0000000e+00	0.0000000e+00	0.0000000e+00	0.0000000e+00	0.0000000e+00	0.0000000e+00
7	0.0000000e+00	0.0000000e+00	0.0000000e+00	0.0000000e+00	0.0000000e+00	0.0000000e+00	0.0000000e+00	0.0000000e+00	0.0000000e+00	0.0000000e+00	0.0000000e+00	0.0000000e+00	0.0000000e+00	0.0000000e+00	0.0000000e+00	0.0000000e+00	0.0000000e+00	0.0000000e+00	0.0000000e+00	0.0000000e+00
8	0.0000000e+00	0.0000000e+00	0.0000000e+00	0.0000000e+00	0.0000000e+00	0.0000000e+00	0.0000000e+00	0.0000000e+00	0.0000000e+00	0.0000000e+00	0.0000000e+00	0.0000000e+00	0.0000000e+00	0.0000000e+00	0.0000000e+00	0.0000000e+00	0.0000000e+00	0.0000000e+00	0.0000000e+00	0.0000000e+00
9	0.0000000e+00	0.0000000e+00	0.0000000e+00	0.0000000e+00	0.0000000e+00	0.0000000e+00	0.0000000e+00	0.0000000e+00	0.0000000e+00	0.0000000e+00	0.0000000e+00	0.0000000e+00	0.0000000e+00	0.0000000e+00	0.0000000e+00	0.0000000e+00	0.0000000e+00	0.0000000e+00	0.0000000e+00	0.0000000e+00
10	0.0000000e+00	0.0000000e+00	0.0000000e+00	0.0000000e+00	0.0000000e+00	0.0000000e+00	0.0000000e+00	0.0000000e+00	0.0000000e+00	0.0000000e+00	0.0000000e+00	0.0000000e+00	0.0000000e+00	0.0000000e+00	0.0000000e+00	0.0000000e+00	0.0000000e+00	0.0000000e+00	0.0000000e+00	0.0000000e+00
11	0.0000000e+00	0.0000000e+00	0.0000000e+00	0.0000000e+00	0.0000000e+00	0.0000000e+00	0.0000000e+00	0.0000000e+00	0.0000000e+00	0.0000000e+00	0.0000000e+00	0.0000000e+00	0.0000000e+00	0.0000000e+00	0.0000000e+00	0.0000000e+00	0.0000000e+00	0.0000000e+00	0.0000000e+00	0.0000000e+00
12	0.0000000e+00	0.0000000e+00	0.0000000e+00	0.0000000e+00	0.0000000e+00	0.0000000e+00	0.0000000e+00	0.0000000e+00	0.0000000e+00	0.0000000e+00	0.0000000e+00	0.0000000e+00	0.0000000e+00	0.0000000e+00	0.0000000e+00	0.0000000e+00	0.0000000e+00	0.0000000e+00	0.0000000e+00	0.0000000e+00
13	0.0000000e+00	0.0000000e+00	0.0000000e+00	0.0000000e+00	0.0000000e+00	0.0000000e+00	0.0000000e+00	0.0000000e+00	0.0000000e+00	0.0000000e+00	0.0000000e+00	0.0000000e+00	0.0000000e+00	0.0000000e+00	0.0000000e+00	0.0000000e+00	0.0000000e+00	0.0000000e+00	0.0000000e+00	0.0000000e+00
14	0.0000000e+00	0.0000000e+00	0.0000000e+00	0.0000000e+00	0.0000000e+00	0.0000000e+00	0.0000000e+00	0.0000000e+00	0.0000000e+00	0.0000000e+00	0.0000000e+00	0.0000000e+00	0.0000000e+00	0.0000000e+00	0.0000000e+00	0.0000000e+00	0.0000000e+00	0.0000000e+00	0.0000000e+00	0.0000000e+00
15	0.0000000e+00	0.0000000e+00	0.0000000e+00	0.0000000e+00	0.0000000e+00	0.0000000e+00	0.0000000e+00	0.0000000e+00	0.0000000e+00	0.0000000e+00	0.0000000e+00	0.0000000e+00	0.0000000e+00	0.0000000e+00	0.0000000e+00	0.0000000e+00	0.0000000e+00	0.0000000e+00	0.0000000e+00	0.0000000e+00
16	0.0000000e+00	0.0000000e+00	0.0000000e+00	0.0000000e+00	0.0000000e+00	0.0000000e+00	0.0000000e+00	0.0000000e+00	0.0000000e+00	0.0000000e+00	0.0000000e+00	0.0000000e+00	0.0000000e+00	0.0000000e+00	0.0000000e+00	0.0000000e+00	0.0000000e+00	0.0000000e+00	0.0000000e+00	0.0000000e+00
17	0.0000000e+00	0.0000000e+00	0.0000000e+00	0.0000000e+00	0.0000000e+00	0.0000000e+00	0.0000000e+00	0.0000000e+00	0.0000000e+00	0.0000000e+00	0.0000000e+00	0.0000000e+00	0.0000000e+00	0.0000000e+00	0.0000000e+00	0.0000000e+00	0.0000000e+00	0.0000000e+00	0.0000000e+00	0.0000000e+00
18	0.0000000e+00	0.0000000e+00	0.0000000e+00	0.0000000e+00	0.0000000e+00	0.0000000e+00	0.0000000e+00	0.0000000e+00	0.0000000e+00	0.0000000e+00	0.0000000e+00	0.0000000e+00	0.0000000e+00	0.0000000e+00	0.0000000e+00	0.0000000e+00	0.0000000e+00	0.0000000e+00	0.0000000e+00	0.0000000e+00
19	0.0000000e+00	0.0000000e+00	0.0000000e+00	0.0000000e+00	0.0000000e+00	0.0000000e+00	0.0000000e+00	0.0000000e+00	0.0000000e+00	0.0000000e+00	0.0000000e+00	0.0000000e+00	0.0000000e+00	0.0000000e+00	0.0000000e+00	0.0000000e+00	0.0000000e+00	0.0000000e+00	0.0000000e+00	0.0000000e+00
20	0.0000000e+00	0.0000000e+00	0.0000000e+00	0.0000000e+00	0.0000000e+00	0.0000000e+00	0.0000000e+00	0.0000000e+00	0.0000000e+00	0.0000000e+00	0.0000000e+00	0.0000000e+00	0.0000000e+00	0.0000000e+00	0.0000000e+00	0.0000000e+00	0.0000000e+00	0.0000000e+00	0.0000000e+00	0.0000000e+00
21	0.0000000e+00	0.0000000e+00	0.0000000e+00	0.0000000e+00	0.0000000e+00	0.0000000e+00	0.0000000e+00	0.0000000e+00	0.0000000e+00	0.0000000e+00	0.0000000e+00	0.0000000e+00	0.0000000e+00	0.0000000e+00	0.0000000e+00	0.0000000e+00	0.0000000e+00	0.0000000e+00	0.0000000e+00	0.0000000e+00
22	0.0000000e+00	0.0000000e+00	0.0000000e+00	0.0000000e+00	0.0000000e+00	0.0000000e+00	0.0000000e+00	0.0000000e+00	0.0000000e+00	0.0000000e+00	0.0000000e+00	0.0000000e+00	0.0000000e+00	0.0000000e+00	0.0000000e+00	0.0000000e+00	0.0000000e+00	0.0000000e+00	0.0000000e+00	0.0000000e+00
23	0.0000000e+00	0.0000000e+00	0.0000000e+00	0.0000000e+00	0.0000000e+00	0.0000000e+00	0.0000000e+00	0.0000000e+00	0.0000000e+00	0.0000000e+00	0.0000000e+00	0.0000000e+00	0.0000000e+00	0.0000000e+00	0.0000000e+00	0.0000000e+00	0.0000000e+00	0.0000000e+00	0.0000000e+00	0.0000000e+00
24	0.0000000e+00	0.0000000e+00	0.0000000e+00	0.0000000e+00	0.0000000e+00	0.0000000e+00	0.0000000e+00	0.0000000e+00	0.0000000e+00	0.0000000e+00	0.0000000e+00	0.0000000e+00	0.0000000e+00	0.0000000e+00	0.0000000e+00	0.0000000e+00	0.0000000e+00	0.0000000e+00	0.0000000e+00	0.0000000e+00
25	0.0000000e+00	0.0000000e+00	0.0000000e+00	0.0000000e+00	0.0000000e+00	0.0000000e+00	0.0000000e+00	0.0000000e+00	0.0000000e+00	0.0000000e+00	0.0000000e+00	0.0000000e+00	0.0000000e+00	0.0000000e+00	0.0000000e+00	0.0000000e+00	0.0000000e+00	0.0000000e+00	0.0000000e+00	0.0000000e+00
26	0.0000000e+00	0.0000000e+00	0.0000000e+00	0.0000000e+00	0.0000000e+00	0.0000000e+00	0.0000000e+00	0.0000000e+00	0.0000000e+00	0.0000000e+00	0.0000000e+00	0.0000000e+00	0.0000000e+00	0.0000000e+00	0.0000000e+00	0.0000000e+00	0.0000000e+00	0.0000000e+00	0.0000000e+00	0.0000000e+00
27	1.1347500e-05	1.1397108e-05	1.1427299e-05	1.1437555e-05	2.8373409e-06	2.8497449e-06	2.8572939e-06	2.8598583e-06	7.0934137e-07	7.1244239e-07	7.1432965e-07	7.1497074e-07	1.7733537e-07	1.7811062e-07	1.7858244e-07	1.7874271e-07	4.4333837e-08	4.4527651e-08	4.4645605e-08	4.4685673e-08
28	3.5915225e-05	3.6076958e-05	3.6182566e-05	3.6221915e-05	8.9814585e-06	9.0219039e-06	9.0483138e-06	9.0581540e-06	2.2453995e-06	2.2555111e-06	2.2621136e-06	2.2645737e-06	5.6135002e-07	5.6387790e-07	5.6552854e-07	5.6614356e-07	1.4033748e-07	1.4096945e-07	1.4138211e-07	1.4153587e-07
29	7.6039637e-05	7.6389780e-05	7.6635010e-05	7.6735189e-05	1.9018401e-05	1.9105976e-05	1.9167312e-05	1.9192368e-05	4.7547119e-06	4.7766063e-06	4.7919406e-06	4.7982049e-06	1.1886784e-06	1.1941520e-06	1.1979856e-06	1.1995517e-06	2.9716953e-07	2.9853793e-07	2.9949632e-07	2.9988784e-07
30	1.3446208e-04	1.3509368e-04	1.3556383e-04	1.3577379e-04	3.3636407e-05	3.3794404e-05	3.3912019e-05	3.3964544e-05	8.4093767e-06	8.4488774e-06	8.4782820e-06	8.4914139e-06	2.1023453e-06	2.1122204e-06	2.1195716e-06	2.1228546e-06	5.2558613e-07	5.2805492e-07	5.2989271e-07	5.3071345e-07
31	2.1414980e-04	2.1517626e-04	2.1597749e-04	2.1636823e-04	5.3581429e-05	5.3838256e-05	5.4038737e-05	5.4136509e-05	1.3395936e-05	1.3460146e-05	1.3510269e-05	1.3534713e-05	3.3489864e-06	3.3650388e-06	3.3775694e-06	3.3836805e-06	8.3724621e-07	8.4125931e-07	8.4439197e-07	8.4591972e-07
32	3.1866633e-04	3.2022671e-04	3.2148720e-04	3.2215743e-04	7.9750343e-05	8.0140854e-05	8.0456322e-05	8.0624074e-05	1.9938689e-05	2.0036322e-05	2.0115194e-05	2.0157135e-05	4.9846766e-06	5.0090850e-06	5.0288028e-06	5.0392880e-06	1.2461684e-06	1.2522705e-06	1.2572000e-06	1.2598213e-06
33	4.5213078e-04	4.5439350e-04	4.5626631e-04	4.5734840e-04	1.1318142e-04	1.1374786e-04	1.1421671e-04	1.1448763e-04	2.8297316e-05	2.8438935e-05	2.8556156e-05	2.8623890e-05	7.0743366e-06	7.1097415e-06	7.1390467e-06	7.1559803e-06	1.7685828e-06	1.7774341e-06	1.7847603e-06	1.7889938e-06
34	6.1960422e-04	6.2277839e-04	6.2544188e-04	6.2710991e-04	1.5515225e-04	1.5594711e-04	1.5661411e-04	1.5703187e-04	3.8791374e-05	3.8990107e-05	3.9156872e-05	3.9261322e-05	9.6978565e-06	9.7475397e-06	9.7892310e-06	9.8153435e-06	2.4244619e-06	2.4368827e-06	2.4473055e-06	2.4538336e-06
35	8.2728252e-04	8.3162875e-04	8.3529838e-04	8.3777047e-04	2.0722968e-04	2.0831845e-04	2.0923775e-04	2.0985713e-04	5.1812816e-05	5.2085036e-05	5.2314886e-05	5.2469751e-05	1.2953225e-05	1.3021280e-05	1.3078743e-05	1.3117459e-05	3.2383027e-06	3.2553164e-06	3.2696821e-06	3.2793611e-06
36	1.0809586e-03	1.0867903e-03	1.0917243e-03	1.0952565e-03	2.7088468e-04	2.7234619e-04	2.7358276e-04	2.7446816e-04	6.7729682e-05	6.8095109e-05	6.8404290e-05	6.8625673e-05	1.6932454e-05	1.7023811e-05	1.7101106e-05	1.7156452e-05	4.2331077e-06	4.2559469e-06	4.2752708e-06	4.2891072e-06
37	1.3888421e-03	1.3965487e-03	1.4030650e-03	1.4079584e-03	3.4820391e-04	3.5013626e-04	3.5177022e-04	3.5299743e-04	8.7064095e-05	8.7547259e-05	8.7955812e-05	8.8262667e-05	2.1766075e-05	2.1886866e-05	2.1989005e-05	2.2065719e-05	5.4415099e-06	5.4717077e-06	5.4972423e-06	5.5164208e-06
38	1.7602493e-03	1.7703200e-03	1.7788033e-03	1.7854114e-03	4.4156381e-04	4.4409043e-04	4.4621881e-04	4.4787708e-04	1.1041079e-04	1.1104257e-04	1.1157476e-04	1.1198941e-04	2.7602776e-05	2.7760720e-05	2.7893769e-05	2.7997432e-05	6.9006807e-06	6.9401666e-06	6.9734287e-06	6.9993445e-06
39	2.2051019e-03	2.2181412e-03	2.2290617e-03	2.2377841e-03	5.5350776e-04	5.5678141e-04	5.5952310e-04	5.6171341e-04	1.3840646e-04	1.3922506e-04	1.3991064e-04	1.4045834e-04	3.4601731e-05	3.4806381e-05	3.4977776e-05	3.5114703e-05	8.6504130e-06	8.7015754e-06	8.7444238e-06	8.7786555e-06
40	2.7362583e-03	2.7530203e-03	2.7669595e-03	2.7782732e-03	6.8734169e-04	6.9155333e-04	6.9505561e-04	6.9789885e-04	1.7187881e-04	1.7293200e-04	1.7380780e-04	1.7451881e-04	4.2969872e-05	4.3233170e-05	4.3452122e-05	4.3629874e-05	1.0742439e-05	1.0808263e-05	1.0863001e-05	1.0907439e-05
41	3.3670510e-03	3.3884660e-03	3.4061262e-03	3.4206071e-03	8.4651805e-04	8.5190383e-04	8.5634511e-04	8.5998755e-04	2.1169254e-04	2.1303941e-04	2.1415008e-04	2.1506098e-04	5.2923381e-05	5.3260101e-05	5.3537768e-05	5.3765496e-05	1.3230803e-05	1.3314983e-05	1.3384399e-05	1.3441331e-05
42	4.1149929e-03	4.1422325e-03	4.1644828e-03	4.1828377e-03	1.0355890e-03	1.0424472e-03	1.0480487e-03	1.0526705e-03	2.5898804e-04	2.6070322e-04	2.6210414e-04	2.6326002e-04	6.4747364e-05	6.5176163e-05	6.5526394e-05	6.5815365e-05	1.6186780e-05	1.6293979e-05	1.6381537e-05	1.6453779e-05
43	4.9985384e-03	5.0330653e-03	5.0609860e-03	5.0840587e-03	1.2593969e-03	1.2681010e-03	1.2751390e-03	1.2809558e-03	3.1497900e-04	3.1715599e-04	3.1891624e-04	3.2037109e-04	7.8745256e-05	7.9289507e-05	7.9729574e-05	8.0093288e-05	1.9686227e-05	1.9822289e-05	1.9932305e-05	2.0023233e-05
44	6.0382830e-03	6.0819264e-03	6.1168466e-03	6.1456657e-03	1.5233966e-03	1.5344155e-03	1.5432306e-03	1.5505065e-03	3.8103327e-04	3.8378942e-04	3.8599435e-04	3.8781426e-04	9.5259037e-05	9.5948081e-05	9.6499316e-05	9.6954298e-05	2.3814636e-05	2.3986896e-05	2.4124704e-05	2.4238448e-05
45	7.2599852e-03	7.3150885e-03	7.3586513e-03	7.3944787e-03	1.8344601e-03	1.8483969e-03	1.8594126e-03	1.8684728e-03	4.5887477e-04	4.6236110e-04	4.6511670e-04	4.6738315e-04	1.1471971e-04	1.1559130e-04	1.1628021e-04	1.1684682e-04	2.8679753e-05	2.8897649e-05	2.9069874e-05	2.9211528e-05
46	8.6915409e-03	8.7611126e-03	8.8153418e-03	8.8596993e-03	2.2001335e-03	2.2177660e-03	2.2315063e-03	2.2427455e-03	5.5039789e-04	5.5480923e-04	5.5824676e-04	5.6105856e-04	1.3760090e-04	1.3870374e-04	1.3956314e-04	1.4026609e-04	3.4399980e-05	3.4675689e-05	3.4890535e-05	3.5066274e-05
47	1.0363894e-02	1.0451767e-02	1.0519162e-02	1.0573895e-02	2.6289123e-03	2.6512371e-03	2.6683531e-03	2.6822524e-03	6.5773704e-04	6.6332303e-04	6.6760562e-04	6.7108336e-04	1.6443625e-04	1.6583277e-04	1.6690343e-04	1.6777287e-04	4.1108721e-05	4.1457847e-05	4.1725509e-05	4.1942869e-05
48	1.2315725e-02	1.2426820e-02	1.2510505e-02	1.2577913e-02	3.1315369e-03	3.1598415e-03	3.1811524e-03	3.1983159e-03	7.8359229e-04	7.9067561e-04	7.9600858e-04	8.0030365e-04	1.9590084e-04	1.9767170e-04	1.9900496e-04	2.0007875e-04	4.8974734e-05	4.9417444e-05	4.9750756e-05	5.0019199e-05
49	1.4586796e-02	1.4727407e-02	1.4831263e-02	1.4914159e-02	3.7193230e-03	3.7552670e-03	3.7817985e-03	3.8029703e-03	9.3081202e-04	9.3980872e-04	9.4644928e-04	9.5174829e-04	2.3270684e-04	2.3495606e-04	2.3661623e-04	2.3794101e-04	5.8176051e-05	5.8738348e-05	5.9153386e-05	5.9484576e-05
50	1.7222049e-02	1.7400169e-02	1.7529097e-02	1.7630901e-02	4.4053383e-03	4.4510469e-03	4.4841051e-03	4.5101991e-03	1.1026894e-03	1.1141325e-03	1.1224083e-03	1.1289405e-03	2.7567764e-04	2.7853850e-04	2.8060749e-04	2.8224058e-04	6.8918499e-05	6.9633702e-05	7.0150942e-05	7.0559209e-05
51	2.0272170e-02	2.0497924e-02	2.0658160e-02	2.0783045e-02	5.2046911e-03	5.2628830e-03	5.3041463e-03	5.3362892e-03	1.3030368e-03	1.3176087e-03	1.3279410e-03	1.3359893e-03	3.2576648e-04	3.2940957e-04	3.3199270e-04	3.3400482e-04	8.1440367e-05	8.2351122e-05	8.2996893e-05	8.3499917e-05
52	2.3790908e-02	2.4077100e-02	2.4276504e-02	2.4429567e-02	6.1339620e-03	6.2081150e-03	6.2597223e-03	6.2993068e-03	1.5360457e-03	1.5546199e-03	1.5675458e-03	1.5774601e-03	3.8402144e-04	3.8866511e-04	3.9189670e-04	3.9437533e-04	9.6003641e-05	9.7164534e-05	9.7972414e-05	9.8592061e-05
53	2.7839263e-02	2.8201922e-02	2.8450401e-02	2.8637889e-02	7.2125651e-03	7.3070914e-03	7.3717735e-03	7.4205300e-03	1.8066325e-03	1.8303176e-03	1.8465236e-03	1.8587388e-03	4.5167179e-04	4.5759328e-04	4.6164492e-04	4.6469882e-04	1.1291560e-04	1.1439593e-04	1.1540882e-04	1.1617228e-04
54	3.2478962e-02	3.2937861e-02	3.3247891e-02	3.3477444e-02	8.4611670e-03	8.5815926e-03	8.6628391e-03	8.7229156e-03	2.1200440e-03	2.1502301e-03	2.1705940e-03	2.1856506e-03	5.3002963e-04	5.3757646e-04	5.4266763e-04	5.4643194e-04	1.3250421e-04	1.3439086e-04	1.3566362e-04	1.3660467e-04
55	3.7778626e-02	3.8358028e-02	3.8745209e-02	3.9026328e-02	9.9037339e-03	1.0056961e-02	1.0159207e-02	1.0233320e-02	2.4823792e-03	2.5208040e-03	2.5464426e-03	2.5650248e-03	6.2062006e-04	6.3022674e-04	6.3663667e-04	6.4128244e-04	1.5515067e-04	1.5755226e-04	1.5915469e-04	1.6031610e-04
56	4.3806978e-02	4.4536263e-02	4.5019928e-02	4.5364464e-02	1.1565918e-02	1.1760471e-02	1.1889321e-02	1.1980920e-02	2.9001881e-03	2.9490010e-03	2.9813266e-03	3.0043041e-03	7.2508119e-04	7.3728508e-04	7.4536692e-04	7.5111161e-04	1.8126443e-04	1.8431528e-04	1.8633567e-04	1.8777178e-04
57	5.0636396e-02	5.1550769e-02	5.2154915e-02	5.2577532e-02	1.3476506e-02	1.3722840e-02	1.3885396e-02	1.3998838e-02	3.3808466e-03	3.4426861e-03	3.4834912e-03	3.5119641e-03	8.4525765e-04	8.6071852e-04	8.7092045e-04	8.7803912e-04	2.1130651e-04	2.1517155e-04	2.1772192e-04	2.1950151e-04
58	5.8333568e-02	5.9474954e-02	6.0228775e-02	6.0747450e-02	1.5664960e-02	1.5975837e-02	1.6180949e-02	1.6321702e-02	3.9319417e-03	4.0100346e-03	4.0615561e-03	4.0969064e-03	9.8304708e-04	1.0025718e-03	1.0154531e-03	1.0242913e-03	2.4575117e-04	2.5063209e-04	2.5385226e-04	2.5606170e-04
59	6.6964677e-02	6.8382446e-02	6.9321033e-02	6.9957877e-02	1.8163398e-02	1.8554280e-02	1.8812875e-02	1.8987835e-02	4.5617847e-03	4.6600462e-03	4.7250507e-03	4.7690242e-03	1.1405284e-03	1.1650960e-03	1.1813485e-03	1.1923428e-03	2.8511797e-04	2.9125948e-04	2.9532237e-04	2.9807079e-04
60	7.6586513e-02	7.8337502e-02	7.9502446e-02	8.0284211e-02	2.1004039e-02	2.1493297e-02	2.1818719e-02	2.2036463e-02	5.2787719e-03	5.4018639e-03	5.4837358e-03	5.5385083e-03	1.3198022e-03	1.3505782e-03	1.3710482e-03	1.3847427e-03	3.2993178e-04	3.3762527e-04	3.4274242e-04	3.4616580e-04
61	8.7253943e-02	8.9403260e-02	9.0843333e-02	9.1802206e-02	2.4222078e-02	2.4831500e-02	2.5239920e-02	2.5511093e-02	6.0921294e-03	6.2455927e-03	6.3484422e-03	6.4167187e-03	1.5231765e-03	1.5615467e-03	1.5872620e-03	1.6043330e-03	3.8076935e-04	3.9036115e-04	3.9678947e-04	4.0105690e-04
62	9.9004462e-02	1.0162570e-01	1.0339702e-01	1.0457152e-01	2.7850450e-02	2.8605594e-02	2.9116298e-02	2.9454051e-02	7.0105888e-03	7.2009392e-03	7.3296801e-03	7.4148103e-03	1.7528363e-03	1.8004301e-03	1.8326195e-03	1.8539048e-03	4.3817657e-04	4.5007395e-04	4.5812059e-04	4.6344144e-04
63	1.1186594e-01	1.1504203e-01	1.1720904e-01	1.1864442e-01	3.1922568e-02	3.2853384e-02	3.3489369e-02	3.3909723e-02	8.0430980e-03	8.2779912e-03	8.4384977e-03	8.5445718e-03	2.0110210e-03	2.0697530e-03	2.1098855e-03	2.1364079e-03	5.0271288e-04	5.1739438e-04	5.2742650e-04	5.3405644e-04
64	1.2584473e-01	1.2966784e-01	1.3230319e-01	1.3405167e-01	3.6467334e-02	3.7608510e-02	3.8396761e-02	3.8918908e-02	9.1975466e-03	9.4858746e-03	9.6850595e-03	9.8169907e-03	2.2997056e-03	2.3717996e-03	2.4216042e-03	2.4545926e-03	5.7487158e-04	5.9289302e-04	6.0534273e-04	6.1358886e-04
65	1.4093183e-01	1.4550440e-01	1.4868820e-01	1.5080923e-01	4.1510820e-02	4.2902533e-02	4.3874125e-02	4.4520816e-02	1.0481197e-02	1.0833291e-02	1.1079139e-02	1.1242769e-02	2.6207089e-03	2.7087488e-03	2.7702226e-03	2.8111377e-03	6.5510682e-04	6.7711397e-04	6.9248040e-04	7.0270786e-04
66	1.5709903e-01	1.6253381e-01	1.6635350e-01	1.6891375e-01	4.7073660e-02	4.8762044e-02	4.9952434e-02	5.0750250e-02	1.1900009e-02	1.2327770e-02	1.2629422e-02	1.2831597e-02	2.9755239e-03	3.0824865e-03	3.1579158e-03	3.2084702e-03	7.4379132e-04	7.7052810e-04	7.8938266e-04	8.0201941e-04
67	1.7430022e-01	1.8072133e-01	1.8527147e-01	1.8834442e-01	5.3170426e-02	5.5208405e-02	5.6657693e-02	5.7637233e-02	1.3458467e-02	1.3975591e-02	1.4343423e-02	1.4592050e-02	3.3652752e-03	3.4945865e-03	3.5865666e-03	3.6487381e-03	8.4120561e-04	8.7352822e-04	8.9651947e-04	9.1205979e-04
68	1.9246637e-01	2.0000906e-01	2.0539127e-01	2.0905763e-01	5.9805417e-02	6.2253041e-02	6.4006237e-02	6.5202507e-02	1.5158458e-02	1.5780539e-02	1.6226238e-02	1.6530394e-02	3.7904381e-03	3.9459990e-03	4.0574532e-03	4.1335126e-03	9.4746794e-04	9.8635121e-04	1.0142097e-03	1.0332210e-03
69	2.1151067e-01	2.2032289e-01	2.2664535e-01	2.3099229e-01	6.6973119e-02	6.9898554e-02	7.2005630e-02	7.3458054e-02	1.6999359e-02	1.7744158e-02	1.8280745e-02	1.8650690e-02	4.2508600e-03	4.4371134e-03	4.5712993e-03	4.6638129e-03	1.0625396e-03	1.1090938e-03	1.1426335e-03	1.1657572e-03
70	2.3133421e-01	2.4157796e-01	2.4895627e-01	2.5407588e-01	7.4659449e-02	7.8139943e-02	8.0656414e-02	8.2408428e-02	1.8978326e-02	1.9866034e-02	2.0508026e-02	2.0955105e-02	4.7458329e-03	4.9678301e-03	5.1283795e-03	5.2401857e-03	1.1862431e-03	1.2417303e-03	1.2818589e-03	1.3098042e-03
71	2.5182236e-01	2.6367492e-01	2.7223168e-01	2.7822041e-01	8.2837902e-02	8.6960601e-02	8.9947486e-02	9.2046435e-02	2.1089235e-02	2.2142700e-02	2.2906109e-02	2.3442734e-02	5.2738276e-03	5.5372851e-03	5.7282041e-03	5.8624082e-03	1.3181958e-03	1.3840445e-03	1.4317628e-03	1.4653056e-03
72	2.7284843e-01	2.8650372e-01	2.9636951e-01	3.0332766e-01	9.1470168e-02	9.6332977e-02	9.9857283e-02	1.0235423e-01	2.3322796e-02	2.4567761e-02	2.5470225e-02	2.6109831e-02	5.8325232e-03	6.1438820e-03	6.3695839e-03	6.5295470e-03	1.4578172e-03	1.5356367e-03	1.5920474e-03	1.6320276e-03
73	2.9428201e-01	3.0995155e-01	3.2126501e-01	3.2929716e-01	1.0051008e-01	1.0622243e-01	1.1035731e-01	1.1330723e-01	2.5667563e-02	2.7132881e-02	2.8193716e-02	2.8950814e-02	6.4190588e-03	6.7855381e-03	7.0508559e-03	7.2402093e-03	1.6043920e-03	1.6959861e-03	1.7622968e-03	1.8096216e-03
74	3.1598317e-01	3.3389375e-01	3.4680324e-01	3.5601745e-01	1.0989822e-01	1.1658006e-01	1.2140540e-01	1.2486669e-01	2.8108434e-02	2.9825817e-02	3.1066168e-02	3.1956220e-02	7.0296581e-03	7.4591930e-03	7.7694178e-03	7.9920306e-03	1.7569763e-03	1.8643275e-03	1.9418601e-03	1.9974961e-03
75	3.3781626e-01	3.5820791e-01	3.7287322e-01	3.8338246e-01	1.1957094e-01	1.2735198e-01	1.3295520e-01	1.3699023e-01	3.0629048e-02	3.2632869e-02	3.4075927e-02	3.5115490e-02	7.6602289e-03	8.1614207e-03	8.5223559e-03	8.7823712e-03	1.9145472e-03	2.0398045e-03	2.1300090e-03	2.1949914e-03
76	3.5964884e-01	3.8277248e-01	3.9936669e-01	4.1128886e-01	1.2946017e-01	1.3847868e-01	1.4495562e-01	1.4963064e-01	3.3211708e-02	3.5538706e-02	3.7209942e-02	3.8416645e-02	8.3063445e-03	8.8883869e-03	9.3064065e-03	9.6082358e-03	2.0759987e-03	2.2214589e-03	2.3259276e-03	2.4013585e-03
77	3.8134591e-01	4.0746299e-01	4.2617411e-01	4.3963344e-01	1.3949055e-01	1.4989290e-01	1.5734847e-01	1.6273411e-01	3.5836618e-02	3.8525762e-02	4.0453101e-02	4.1845770e-02	8.9630519e-03	9.6356971e-03	1.0117789e-02	1.0466144e-02	2.2400930e-03	2.4081925e-03	2.5286713e-03	2.6157278e-03
78	4.0277377e-01	4.3215718e-01	4.5318897e-01	4.6831621e-01	1.4958290e-01	1.6152367e-01	1.7007225e-01	1.7624346e-01	3.8482818e-02	4.1575332e-02	4.3789259e-02	4.5387903e-02	9.6251069e-03	1.0398672e-02	1.0952465e-02	1.1352353e-02	2.4055199e-03	2.5988361e-03	2.7372309e-03	2.8371639e-03
79	4.2380348e-01	4.5673831e-01	4.8030856e-01	4.9724363e-01	1.5965713e-01	1.7329919e-01	1.8306381e-01	1.9010107e-01	4.1128974e-02	4.4668361e-02	4.7201701e-02	4.9027824e-02	1.0287170e-02	1.1172541e-02	1.1806252e-02	1.2263054e-02	2.5709456e-03	2.7921983e-03	2.9505613e-03	3.0647152e-03
80	4.4431213e-01	4.8109590e-01	5.0743410e-01	5.2632800e-01	1.6963379e-01	1.8514821e-01	1.9625933e-01	2.0424948e-01	4.3753806e-02	4.7785805e-02	5.0673405e-02	5.2750232e-02	1.0943915e-02	1.1952541e-02	1.2674889e-02	1.3194419e-02	2.7350396e-03	2.9870884e-03	3.1675983e-03	3.2974253e-03
81	4.6418158e-01	5.0512368e-01	5.3446855e-01	5.5548531e-01	1.7943375e-01	1.9699913e-01	2.0959319e-01	2.1863037e-01	4.6336015e-02	5.0908426e-02	5.4186769e-02	5.6539480e-02	1.1590012e-02	1.2733855e-02	1.3553971e-02	1.4142530e-02	2.8964701e-03	3.1823036e-03	3.3872415e-03	3.5343157e-03
82	4.8329697e-01	5.2871712e-01	5.6131707e-01	5.8463576e-01	1.8897908e-01	2.0878059e-01	2.2300009e-01	2.3318674e-01	4.8854559e-02	5.4016976e-02	5.7724191e-02	6.0380192e-02	1.2220194e-02	1.3511666e-02	1.4439093e-02	1.5103540e-02	3.0539218e-03	3.3766405e-03	3.6083902e-03	3.7744252e-03
83	5.0154859e-01	5.5177278e-01	5.8788719e-01	6.1370285e-01	1.9819426e-01	2.2042132e-01	2.3641525e-01	2.4786262e-01	5.1288993e-02	5.7092180e-02	6.1268161e-02	6.4257212e-02	1.2829342e-02	1.4281149e-02	1.5325871e-02	1.6073655e-02	3.2061160e-03	3.5688941e-03	3.8299496e-03	4.0168060e-03
84	5.1883926e-01	5.7419267e-01	6.1409326e-01	6.4261518e-01	2.0701131e-01	2.3185392e-01	2.4977855e-01	2.6260592e-01	5.3620862e-02	6.0115790e-02	6.4802386e-02	6.8156411e-02	1.3412837e-02	1.5037735e-02	1.6210227e-02	1.7049337e-02	3.3518990e-03	3.7579231e-03	4.0509012e-03	4.2605749e-03
85	5.3508078e-01	5.9587772e-01	6.3984803e-01	6.7129667e-01	2.1536543e-01	2.4300801e-01	2.6302597e-01	2.7735876e-01	5.5832481e-02	6.3068659e-02	6.8309431e-02	7.2061990e-02	1.3966252e-02	1.5776633e-02	1.7087796e-02	1.8026632e-02	3.4901650e-03	3.9425305e-03	4.2701545e-03	4.5047438e-03
86	5.5020312e-01	6.1674047e-01	6.6507700e-01	6.9968262e-01	2.2320533e-01	2.5382392e-01	2.7610547e-01	2.9207493e-01	5.7909852e-02	6.5934596e-02	7.1775160e-02	7.5961396e-02	1.4486081e-02	1.6493788e-02	1.7955040e-02	1.9002396e-02	3.6200387e-03	4.1217040e-03	4.4868260e-03	4.7485280e-03
87	5.6414453e-01	6.3668872e-01	6.8969841e-01	7.2770093e-01	2.3048330e-01	2.6423770e-01	2.8895883e-01	3.0670161e-01	5.9839881e-02	6.8696202e-02	7.5183712e-02	7.9840211e-02	1.4969047e-02	1.7184846e-02	1.8807988e-02	1.9973021e-02	3.7407013e-03	4.2943556e-03	4.6999237e-03	4.9910258e-03
88	5.7685689e-01	6.5563480e-01	7.1363131e-01	7.5528201e-01	2.3716077e-01	2.7418958e-01	3.0153016e-01	3.2118923e-01	6.1611944e-02	7.1337226e-02	7.8519884e-02	8.3684928e-02	1.5412489e-02	1.7845737e-02	1.9642833e-02	2.0935125e-02	3.8514885e-03	4.4594692e-03	4.9084971e-03	5.2313928e-03
89	5.8830736e-01	6.7350086e-01	7.3679727e-01	7.8236016e-01	2.4320899e-01	2.8362656e-01	3.1376658e-01	3.3549210e-01	6.3218070e-02	7.3843249e-02	8.1769309e-02	8.7483104e-02	1.5814411e-02	1.8472852e-02	2.0455980e-02	2.1885593e-02	3.9519019e-03	4.6161432e-03	5.1116479e-03	5.4688510e-03
90	5.9847979e-01	6.9021842e-01	7.5911792e-01	8.0886980e-01	2.4860872e-01	2.9250058e-01	3.2561484e-01	3.4956396e-01	6.4652826e-02	7.6201154e-02	8.4917493e-02	9.1222119e-02	1.6173452e-02	1.9062908e-02	2.1243800e-02	2.2821266e-02	4.0416017e-03	4.7635575e-03	5.3084698e-03	5.7026112e-03
91	6.0737984e-01	7.0573074e-01	7.8051869e-01	8.3474939e-01	2.5335419e-01	3.0077169e-01	3.3702564e-01	3.6336284e-01	6.5914408e-02	7.8400027e-02	8.7951055e-02	9.4890554e-02	1.6489161e-02	1.9613171e-02	2.2002942e-02	2.3739284e-02	4.1204750e-03	4.9010296e-03	5.4981261e-03	5.9319593e-03
92	6.1503626e-01	7.1999048e-01	8.0092243e-01	8.5993299e-01	2.5745299e-01	3.0840551e-01	3.4794859e-01	3.7684466e-01	6.7004597e-02	8.0430454e-02	9.0856318e-02	9.8476416e-02	1.6761980e-02	2.0121286e-02	2.2729984e-02	2.4636646e-02	4.1886331e-03	5.0279709e-03	5.6797617e-03	6.1561457e-03
93	6.2150196e-01	7.3296052e-01	8.2025253e-01	8.8435101e-01	2.6092678e-01	3.1537386e-01	3.5833399e-01	3.8996361e-01	6.7928948e-02	8.2284680e-02	9.3619794e-02	1.0196727e-01	1.6993301e-02	2.0585309e-02	2.3421548e-02	2.5510238e-02	4.2464231e-03	5.1438965e-03	5.8525333e-03	6.3743927e-03
94	6.2685313e-01	7.4461770e-01	8.3844111e-01	9.0793516e-01	2.6381126e-01	3.2165750e-01	3.6813828e-01	4.0267631e-01	6.8696789e-02	8.3957371e-02	9.6229678e-02	1.0535137e-01	1.7185456e-02	2.1003905e-02	2.4074681e-02	2.6357119e-02	4.2944284e-03	5.2484728e-03	6.0157026e-03	6.5859656e-03
95	6.3118670e-01	7.5495522e-01	8.5542999e-01	9.3061806e-01	2.6615432e-01	3.2724676e-01	3.7732378e-01	4.1494044e-01	6.9320737e-02	8.5445769e-02	9.8675739e-02	1.0861725e-01	1.7341602e-02	2.1376384e-02	2.4686819e-02	2.7174424e-02	4.3334376e-03	5.3415273e-03	6.1686301e-03	6.7901486e-03
96	6.3461433e-01	7.6398508e-01	8.7116858e-01	9.5233099e-01	2.6801262e-01	3.3214233e-01	3.8585651e-01	4.2671217e-01	6.9815759e-02	8.6749872e-02	1.0094872e-01	1.1175306e-01	1.7465484e-02	2.1702744e-02	2.5255648e-02	2.7959179e-02	4.3643864e-03	5.4230598e-03	6.3107371e-03	6.9861992e-03
97	6.3726102e-01	7.7174230e-01	8.8561605e-01	9.7300334e-01	2.6945112e-01	3.3635845e-01	3.9370883e-01	4.3794777e-01	7.0199069e-02	8.7873320e-02	1.0304109e-01	1.1474695e-01	1.7561410e-02	2.1983896e-02	2.5779279e-02	2.8708423e-02	4.3883509e-03	5.4932979e-03	6.4415523e-03	7.1733778e-03
98	6.3925621e-01	7.7828608e-01	8.9874272e-01	9.9256690e-01	2.7053815e-01	3.3992366e-01	4.0086058e-01	4.4860650e-01	7.0488810e-02	8.8823608e-02	1.0494735e-01	1.1758797e-01	1.7633920e-02	2.2221713e-02	2.6256337e-02	2.9419413e-02	4.4064656e-03	5.5527101e-03	6.5607318e-03	7.3509989e-03
99	6.4072461e-01	7.8369667e-01	9.1052932e-01	1.0000000e+00	2.7133996e-01	3.4287808e-01	4.0729658e-01	4.5864853e-01	7.0702587e-02	8.9611306e-02	1.0666330e-01	1.2026535e-01	1.7687420e-02	2.2418843e-02	2.6685770e-02	3.0089454e-02	4.4198310e-03	5.6019572e-03	6.6680134e-03	7.5183893e-03
100	6.4178085e-01	7.8807424e-01	9.2097182e-01	1.0000000e+00	2.7191787e-01	3.4527322e-01	4.1301006e-01	4.6803817e-01	7.0856704e-02	9.0250046e-02	1.0818698e-01	1.2276940e-01	1.7725990e-02	2.2578694e-02	2.7067088e-02	3.0716120e-02	4.4294664e-03	5.6418915e-03	6.7632747e-03	7.6749435e-03
101	6.4252407e-01	7.9153421e-01	9.3008688e-01	1.0000000e+00	2.7232530e-01	3.4716997e-01	4.1800693e-01	4.7674745e-01	7.0965385e-02	9.0755997e-02	1.0951987e-01	1.2509257e-01	1.7753188e-02	2.2705315e-02	2.7400661e-02	3.1297519e-02	4.4362612e-03	5.6735237e-03	6.8466078e-03	7.8201888e-03
102	6.4303506e-01	7.9420444e-01	9.3791309e-01	1.0000000e+00	2.7260596e-01	3.4863657e-01	4.2230541e-01	4.8475317e-01	7.1040267e-02	9.1147299e-02	1.1066675e-01	1.2722856e-01	1.7771929e-02	2.2803243e-02	2.7687680e-02	3.1832080e-02	4.4409429e-03	5.6979881e-03	6.9183108e-03	7.9537323e-03
103	6.4337738e-01	7.9621622e-01	9.4451130e-01	1.0000000e+00	2.7279431e-01	3.4974350e-01	4.2593590e-01	4.9203585e-01	7.1090532e-02	9.1442702e-02	1.1163560e-01	1.2917207e-01	1.7784508e-02	2.2877172e-02	2.7930150e-02	3.2318470e-02	4.4440855e-03	5.7164569e-03	6.9788844e-03	8.0752416e-03
104	6.4360033e-01	7.9769601e-01	9.4996382e-01	1.0000000e+00	2.7291718e-01	3.5055901e-01	4.2894080e-01	4.9858183e-01	7.1123329e-02	9.1660379e-02	1.1243767e-01	1.3091932e-01	1.7792716e-02	2.2931648e-02	2.8130880e-02	3.2755745e-02	4.4461359e-03	5.7300662e-03	7.0290303e-03	8.1844811e-03
105	6.4374124e-01	7.9876009e-01	9.5437393e-01	1.0000000e+00	2.7299496e-01	3.5114640e-01	4.3137523e-01	5.0438906e-01	7.1144094e-02	9.1817197e-02	1.1308761e-01	1.3246971e-01	1.7797913e-02	2.2970895e-02	2.8293536e-02	3.3143753e-02	4.4474342e-03	5.7398706e-03	7.0696645e-03	8.2814122e-03
106	6.4382735e-01	7.9950862e-01	9.5785862e-01	1.0000000e+00	2.7304257e-01	3.5156027e-01	4.3330195e-01	5.0946486e-01	7.1156809e-02	9.1927712e-02	1.1360209e-01	1.3382509e-01	1.7801095e-02	2.2998553e-02	2.8422295e-02	3.3482960e-02	4.4482292e-03	5.7467800e-03	7.1018307e-03	8.3661519e-03
107	6.4387797e-01	8.0002306e-01	9.6054687e-01	1.0000000e+00	2.7307060e-01	3.5184512e-01	4.3479047e-01	5.1382760e-01	7.1164294e-02	9.2003789e-02	1.1399965e-01	1.3499028e-01	1.7802968e-02	2.3017592e-02	2.8521788e-02	3.3774568e-02	4.4486971e-03	5.7515365e-03	7.1266860e-03	8.4390004e-03
108	6.4390668e-01	8.0036759e-01	9.6257162e-01	1.0000000e+00	2.7308652e-01	3.5203617e-01	4.3591323e-01	5.1751001e-01	7.1168547e-02	9.2054822e-02	1.1429956e-01	1.3597394e-01	1.7804032e-02	2.3030364e-02	2.8596848e-02	3.4020748e-02	4.4489630e-03	5.7547271e-03	7.1454371e-03	8.5005000e-03
109	6.4392211e-01	8.0059195e-01	9.6406073e-01	1.0000000e+00	2.7309509e-01	3.5216076e-01	4.3674016e-01	5.2055698e-01	7.1170837e-02	9.2088109e-02	1.1452050e-01	1.3678801e-01	1.7804606e-02	2.3038695e-02	2.8652141e-02	3.4224483e-02	4.4491062e-03	5.7568083e-03	7.1592500e-03	8.5513962e-03
110	6.4393003e-01	8.0073371e-01	9.6513128e-01	1.0000000e+00	2.7309950e-01	3.5223959e-01	4.3733550e-01	5.2302433e-01	7.1172013e-02	9.2109175e-02	1.1467958e-01	1.3744734e-01	1.7804900e-02	2.3043967e-02	2.8691955e-02	3.4389492e-02	4.4491798e-03	5.7581253e-03	7.1691962e-03	8.5926181e-03
111	6.4393390e-01	8.0082033e-01	9.6588419e-01	1.0000000e+00	2.7310165e-01	3.5228783e-01	4.3775475e-01	5.2497613e-01	7.1172589e-02	9.2122067e-02	1.1479163e-01	1.3796898e-01	1.7805044e-02	2.3047194e-02	2.8719998e-02	3.4520045e-02	4.4492157e-03	5.7589313e-03	7.1762018e-03	8.6252320e-03
112	6.4393564e-01	8.0087124e-01	9.6640160e-01	1.0000000e+00	2.7310262e-01	3.5231622e-01	4.3804327e-01	5.2648383e-01	7.1172849e-02	9.2129655e-02	1.1486876e-01	1.3837201e-01	1.7805109e-02	2.3049093e-02	2.8739301e-02	3.4620911e-02	4.4492320e-03	5.7594058e-03	7.1810238e-03	8.6504296e-03
113	6.4393642e-01	8.0090011e-01	9.6674809e-01	1.0000000e+00	2.7310305e-01	3.5233234e-01	4.3823676e-01	5.2762093e-01	7.1172964e-02	9.2133966e-02	1.1492049e-01	1.3867602e-01	1.7805138e-02	2.3050172e-02	2.8752247e-02	3.4696997e-02	4.4492392e-03	5.7596753e-03	7.1842580e-03	8.6694370e-03
114	6.4393661e-01	8.0091563e-01	9.6697370e-01	1.0000000e+00	2.7310316e-01	3.5234102e-01	4.3836290e-01	5.2845817e-01	7.1172993e-02	9.2136286e-02	1.1495422e-01	1.3889991e-01	1.7805145e-02	2.3050752e-02	2.8760689e-02	3.4753028e-02	4.4492410e-03	5.7598203e-03	7.1863669e-03	8.6834344e-03
115	6.4393661e-01	8.0092359e-01	9.6711624e-01	1.0000000e+00	2.7310316e-01	3.5234547e-01	4.3844270e-01	5.2906079e-01	7.1172993e-02	9.2137479e-02	1.1497556e-01	1.3906107e-01	1.7805145e-02	2.3051051e-02	2.8766030e-02	3.4793364e-02	4.4492410e-03	5.7598949e-03	7.1877013e-03	8.6935108e-03
116	6.4393661e-01	8.0092748e-01	9.6720333e-01	1.0000000e+00	2.7310316e-01	3.5234765e-01	4.3849152e-01	5.2948512e-01	7.1172993e-02	9.2138062e-02	1.1498862e-01	1.3917458e-01	1.7805145e-02	2.3051197e-02	2.8769298e-02	3.4821771e-02	4.4492410e-03	5.7599313e-03	7.1885177e-03	8.7006070e-03
117	6.4393661e-01	8.0092923e-01	9.6725451e-01	1.0000000e+00	2.7310316e-01	3.5234864e-01	4.3852025e-01	5.2977707e-01	7.1172993e-02	9.2138325e-02	1.1499631e-01	1.3925268e-01	1.7805145e-02	2.3051262e-02	2.8771222e-02	3.4841319e-02	4.4492410e-03	5.7599478e-03	7.1889982e-03	8.7054904e-03
118	6.4393661e-01	8.0093001e-01	9.6728353e-01	1.0000000e+00	2.7310316e-01	3.5234908e-01	4.3853656e-01	5.2997283e-01	7.1172993e-02	9.2138442e-02	1.1500067e-01	1.3930506e-01	1.7805145e-02	2.3051292e-02	2.8772314e-02	3.4854429e-02	4.4492410e-03	5.7599551e-03	7.1892711e-03	8.7087654e-03
119	6.4393661e-01	8.0093021e-01	9.6729913e-01	1.0000000e+00	2.7310316e-01	3.5234918e-01	4.3854534e-01	5.3010046e-01	7.1172993e-02	9.2138471e-02	1.1500302e-01	1.3933922e-01	1.7805145e-02	2.3051299e-02	2.8772902e-02	3.4862977e-02	4.4492410e-03	5.7599569e-03	7.1894180e-03	8.7109008e-03
120	6.4393661e-01	8.0093021e-01	9.6730714e-01	1.0000000e+00	2.7310316e-01	3.5234918e-01	4.3854985e-01	5.3018118e-01	7.1172993e-02	9.2138471e-02	1.1500423e-01	1.3936083e-01	1.7805145e-02	2.3051299e-02	2.8773204e-02	3.4868385e-02	4.4492410e-03	5.7599569e-03	7.1894934e-03	8.7122517e-03
