# Supplementary material for: Quantifying the Potential for Future Gene Therapy to Lower Lifetime Risk of Polygenic Late-Onset Diseases
Source: MDPI journal article supplement (doi:10.3390/ijms20133352), 2019-07-08
Supplement: s2 [file s2 › SuppFiles/Results/LODsCommonLow/ProstateCancer/-1.000/FrailtyAnalysis.csv]

Age	Heritability	MeanOR	CaseOR	nControls	nCases	nCumIncidence	nIncidence	nLifeIncidence0	nAbsIncidence0	nLifeIncidence5	nAbsIncidence5	nLifeIncidence10	nAbsIncidence10	nLifeIncidence15	nAbsIncidence15	nIncActDivExp
43	0.318858	0.427028	1	1000000000	0	0	0	0	0	0	0	0	0	0	0	0
44	0.318859	0.427028	0.828711	999998984	1016	1.016e-06	1.016e-06	9.67303e-07	9.67303e-07	9.77758e-07	9.77758e-07	9.86241e-07	9.86241e-07	9.93658e-07	9.93658e-07	0.0668057
45	0.318859	0.427028	0.809409	999996650	2334	3.35e-06	2.334e-06	3.18362e-06	2.21632e-06	3.21956e-06	2.24181e-06	3.24821e-06	2.26197e-06	3.27309e-06	2.27943e-06	0.0677291
46	0.318859	0.427026	0.833046	999992605	4045	7.395e-06	4.04501e-06	7.01375e-06	3.83013e-06	7.09694e-06	3.87738e-06	7.16187e-06	3.91366e-06	7.21777e-06	3.94468e-06	0.0687836
47	0.31886	0.427025	0.814524	999986421	6184	1.3579e-05	6.18405e-06	1.28511e-05	5.83732e-06	1.30121e-05	5.91518e-06	1.31348e-05	5.97294e-06	1.32393e-05	6.02155e-06	0.0690565
48	0.318861	0.427022	0.828355	999977226	9195	2.2774e-05	9.19512e-06	2.15011e-05	8.65001e-06	2.17876e-05	8.77543e-06	2.20002e-05	8.86536e-06	2.21791e-05	8.93975e-06	0.0716716
49	0.318863	0.427018	0.828193	999964364	12862	3.5636e-05	1.28623e-05	3.35555e-05	1.20544e-05	3.40331e-05	1.22455e-05	3.4378e-05	1.23779e-05	3.46643e-05	1.24853e-05	0.0726653
50	0.318865	0.427013	0.830965	999946640	17724	5.336e-05	1.77246e-05	5.00984e-05	1.65429e-05	5.08634e-05	1.68304e-05	5.14019e-05	1.70239e-05	5.18414e-05	1.7177e-05	0.0744524
51	0.318868	0.427007	0.829637	999922914	23726	7.7086e-05	2.37273e-05	7.21429e-05	2.20445e-05	7.33291e-05	2.24657e-05	7.41447e-05	2.27428e-05	7.4797e-05	2.29556e-05	0.0754894
52	0.318872	0.426998	0.829761	999891224	31690	0.000108776	3.16924e-05	0.00010144	2.92971e-05	0.000103243	2.99135e-05	0.000104457	3.03124e-05	0.000105405	3.06084e-05	0.0774735
53	0.318877	0.426986	0.831919	999849112	42112	0.000150888	4.21166e-05	0.000140159	3.8719e-05	0.000142859	3.9616e-05	0.000144648	4.01904e-05	0.000146008	4.06023e-05	0.0800453
54	0.318884	0.42697	0.831104	999793445	55667	0.000206555	5.56754e-05	0.000191034	5.08752e-05	0.00019503	5.21717e-05	0.000197646	5.29989e-05	0.000199579	5.35717e-05	0.0831248
55	0.318893	0.426949	0.82853	999721261	72184	0.000278739	7.21989e-05	0.000256572	6.55373e-05	0.000262404	6.73737e-05	0.000266191	6.85445e-05	0.000268912	6.93327e-05	0.0855038
56	0.318904	0.426923	0.831907	999627633	93628	0.000372367	9.36541e-05	0.00034097	8.43982e-05	0.000349397	8.69926e-05	0.000354845	8.86545e-05	0.00035866	8.97481e-05	0.0888213
57	0.318919	0.426888	0.830774	999507111	120522	0.000492889	0.000120567	0.000448763	0.000107794	0.000460818	0.000111421	0.000468611	0.000113766	0.000473943	0.000115283	0.0924769
58	0.318938	0.426845	0.829196	999353295	153816	0.000646705	0.000153892	0.000585169	0.000136406	0.000602241	0.000141423	0.00061331	0.000144699	0.00062074	0.000146797	0.0964678
59	0.318962	0.42679	0.829608	999159963	193332	0.000840037	0.000193457	0.000755044	0.000169875	0.000778931	0.00017669	0.000794503	0.000181193	0.000804806	0.000184066	0.100236
60	0.318992	0.426721	0.82908	998918250	241713	0.00108175	0.000241916	0.000965337	0.000210293	0.000998387	0.000219456	0.00102011	0.000225605	0.00103433	0.000229526	0.10488
61	0.319028	0.426637	0.828951	998619667	298583	0.00138033	0.000298906	0.00122236	0.000257023	0.00126754	0.000269149	0.00129753	0.000277422	0.00131705	0.000282722	0.10987
62	0.319073	0.426533	0.830209	998254934	364733	0.00174507	0.000365237	0.00153276	0.000310402	0.00159375	0.000326214	0.00163472	0.000337192	0.00166134	0.000344286	0.115429
63	0.319127	0.426409	0.828526	997817312	437622	0.00218269	0.000438387	0.00190065	0.000367887	0.00198184	0.000388088	0.00203709	0.000402363	0.00207302	0.000411684	0.120874
64	0.319191	0.426262	0.828901	997300074	517238	0.00269993	0.000518369	0.00232979	0.000429137	0.00243632	0.000454482	0.0025098	0.000472714	0.00255779	0.000484761	0.126561
65	0.319265	0.42609	0.828343	996697179	602895	0.00330282	0.000604527	0.00282303	0.00049324	0.00296084	0.000524525	0.00305718	0.00054738	0.0031205	0.000562718	0.132635
66	0.31935	0.425893	0.829914	996005571	691608	0.00399443	0.0006939	0.00338046	0.000557436	0.00355619	0.000595343	0.00368061	0.000623429	0.0037631	0.000642594	0.138774
67	0.319447	0.425671	0.828739	995224594	780977	0.00477541	0.000784109	0.00399996	0.000619502	0.00422083	0.000664643	0.00437911	0.000698498	0.0044851	0.000722005	0.144869
68	0.319554	0.425422	0.828763	994352264	872330	0.00564774	0.000876516	0.00468018	0.000680217	0.00495415	0.000733324	0.0051527	0.000773591	0.00528715	0.000802046	0.151458
69	0.319673	0.425148	0.828697	993391192	961072	0.00660881	0.000966531	0.00541588	0.000735701	0.00575153	0.000797373	0.00599716	0.000844465	0.00616549	0.000878343	0.157933
70	0.319803	0.424848	0.828642	992341579	1049613	0.00765842	0.0010566	0.00620347	0.000787588	0.00661023	0.000858709	0.00691034	0.000913174	0.00711846	0.000952965	0.164853
71	0.319943	0.424523	0.82893	991207289	1134290	0.00879271	0.00114304	0.00703634	0.000832875	0.00752447	0.000914238	0.00788675	0.000976408	0.00814093	0.00102247	0.171713
72	0.320093	0.424175	0.828276	989992800	1214489	0.0100072	0.00122526	0.00790725	0.00087091	0.00848785	0.000963381	0.00892032	0.00103358	0.00922715	0.00108623	0.178482
73	0.320254	0.423803	0.828614	988699082	1293718	0.0113009	0.0013068	0.00881128	0.000904024	0.00949666	0.0010088	0.0100079	0.00108756	0.0103744	0.00114728	0.185678
74	0.320423	0.423411	0.827802	987333603	1365479	0.0126664	0.00138109	0.00973885	0.00092757	0.0105419	0.00104527	0.0111408	0.0011329	0.0115742	0.00119981	0.192347
75	0.320602	0.422997	0.828022	985893809	1439794	0.0141062	0.00145826	0.0106872	0.000948335	0.0116223	0.00108036	0.0123187	0.00117792	0.0128269	0.00125264	0.199869
76	0.320789	0.422562	0.827057	984382749	1511060	0.0156173	0.00153268	0.0116495	0.000962334	0.0127318	0.00110953	0.0135366	0.00121791	0.0141276	0.00130074	0.207402
77	0.320985	0.422106	0.827093	982804008	1578741	0.017196	0.00160379	0.0126185	0.000968984	0.0138639	0.00113212	0.0147889	0.00125232	0.0154712	0.00134357	0.214831
78	0.32119	0.42163	0.826672	981155361	1648647	0.0188446	0.00167749	0.01359	0.000971548	0.015016	0.00115204	0.0160745	0.00128557	0.0168571	0.00138594	0.2229
79	0.321404	0.421133	0.826807	979442731	1712630	0.0205573	0.00174552	0.014555	0.000964964	0.0161794	0.00116339	0.0173855	0.00131102	0.018278	0.00142092	0.230464
80	0.321625	0.420617	0.826733	977663155	1779576	0.0223368	0.00181693	0.0155093	0.000954298	0.0173515	0.00117214	0.0187209	0.00133532	0.0197339	0.00145591	0.238684
81	0.321856	0.42008	0.826061	975817716	1845439	0.0241823	0.0018876	0.0164464	0.00093704	0.0185268	0.00117529	0.0200759	0.00135505	0.0212214	0.00148742	0.246982
82	0.322094	0.419523	0.826245	973908180	1909536	0.0260918	0.00195686	0.017359	0.000912663	0.0196988	0.00117202	0.0214452	0.00136933	0.0227361	0.00151472	0.25524
83	0.322341	0.418948	0.825828	971939067	1969113	0.0280609	0.00202187	0.0182389	0.000879898	0.0208592	0.0011604	0.0228212	0.00137598	0.0242715	0.00153546	0.263066
84	0.322595	0.418352	0.825482	969904182	2034885	0.0300958	0.00209363	0.0190826	0.000843684	0.0220057	0.00114654	0.0242035	0.0013823	0.0258292	0.0015577	0.271872
85	0.322858	0.417737	0.825294	967807740	2096442	0.0321923	0.00216149	0.0198823	0.000799751	0.02313	0.00112422	0.0255843	0.00138084	0.0274023	0.00157309	0.280252
86	0.323129	0.417101	0.824724	965644482	2163258	0.0343555	0.00223521	0.0206345	0.000752186	0.0242284	0.00109842	0.026962	0.00137769	0.0289907	0.00158842	0.28946
87	0.32341	0.416445	0.824326	963418263	2226219	0.0365817	0.00230542	0.0213326	0.000698098	0.0252924	0.00106402	0.0283284	0.00136639	0.0305872	0.00159642	0.298267
88	0.323698	0.415769	0.824199	961130356	2287907	0.0388696	0.00237478	0.0219719	0.00063931	0.0263147	0.00102235	0.0296767	0.00134826	0.0321859	0.00159874	0.30701
89	0.323994	0.415071	0.824387	958779114	2351242	0.0412209	0.00244633	0.0225495	0.000577583	0.0272896	0.000974848	0.0310015	0.00132478	0.0337831	0.0015972	0.316073
90	0.324299	0.414354	0.823635	956363999	2415115	0.043636	0.00251895	0.0230632	0.000513695	0.0282109	0.000921318	0.0322966	0.00129511	0.0353739	0.00159074	0.325304
91	0.324612	0.413616	0.823782	953890199	2473800	0.0461098	0.00258667	0.0235111	0.000447931	0.0290711	0.000860165	0.0335527	0.0012561	0.0369493	0.00157546	0.333928
92	0.324934	0.412856	0.822853	951348162	2542037	0.0486518	0.00266492	0.0238957	0.000384559	0.0298682	0.000797132	0.0347676	0.00121497	0.0385095	0.00156023	0.34393
93	0.325264	0.412077	0.822075	948744158	2604004	0.0512558	0.00273717	0.0242181	0.000322402	0.0305958	0.000727637	0.0359312	0.0011636	0.0400441	0.00153454	0.353176
94	0.325602	0.411275	0.822273	946078291	2665867	0.0539217	0.00280989	0.0244822	0.000264081	0.0312507	0.00065487	0.0370365	0.0011053	0.0415461	0.00150206	0.362494
95	0.32595	0.410452	0.821826	943346803	2731488	0.0566532	0.00288717	0.0246934	0.000211226	0.0318317	0.000580987	0.0380785	0.00104201	0.0430109	0.00146476	0.372411
96	0.326305	0.409608	0.820916	940555248	2791555	0.0594448	0.0029592	0.0248575	0.000164088	0.0323372	0.000505467	0.0390492	0.000970652	0.0444283	0.00141744	0.381661
97	0.32667	0.408741	0.820845	937697592	2857656	0.0623024	0.00303826	0.0249818	0.000124251	0.0327695	0.000432306	0.0399453	0.000896104	0.0457942	0.00136582	0.391824
98	0.327043	0.407853	0.820682	934778588	2919004	0.0652214	0.00311295	0.0250731	9.13648e-05	0.0331309	0.000361402	0.040761	0.000815657	0.0470985	0.00130436	0.401428
99	0.327425	0.406941	0.820595	931795953	2982635	0.068204	0.00319074	0.0251386	6.5439e-05	0.0334263	0.00029546	0.0414936	0.000732684	0.0483351	0.00123663	0.411437
100	0.327816	0.406006	0.819688	928746581	3049372	0.0712534	0.00327257	0.0251843	4.57406e-05	0.0336621	0.000235808	0.0421422	0.000648601	0.0494984	0.00116327	0.421972
101	0.328216	0.40505	0.818946	925634885	3111696	0.0743651	0.00335043	0.0252154	3.11481e-05	0.0338451	0.000182905	0.0427057	0.000563435	0.0505804	0.00108197	0.431996
102	0.328624	0.40407	0.818805	922461528	3173357	0.0775385	0.0034283	0.0252361	2.06903e-05	0.033983	0.000137978	0.0431857	0.000480065	0.0515755	0.000995101	0.442026
103	0.329041	0.403068	0.817836	919224649	3236879	0.0807754	0.00350896	0.0252495	1.33683e-05	0.0340843	0.000101314	0.0435865	0.000400758	0.05248	0.000904481	0.452416
104	0.329467	0.402044	0.817764	915929088	3295561	0.0840709	0.00358515	0.0252579	8.37072e-06	0.0341566	7.23046e-05	0.043913	0.000326458	0.0532895	0.000809555	0.462232
105	0.329902	0.400995	0.816937	912567554	3361534	0.0874324	0.00367008	0.025263	5.07592e-06	0.0342071	5.0423e-05	0.0441729	0.000259947	0.0540045	0.000714998	0.473176
106	0.330346	0.399922	0.816733	909144322	3423232	0.0908557	0.00375121	0.0252659	2.97821e-06	0.0342413	3.42666e-05	0.0443741	0.000201218	0.0546244	0.000619845	0.483631
107	0.330798	0.398827	0.816264	905662019	3482303	0.094338	0.00383031	0.0252676	1.67151e-06	0.034264	2.27046e-05	0.0445255	0.000151411	0.0551512	0.000526803	0.493825
108	0.331259	0.397708	0.815187	902116671	3545348	0.0978833	0.00391465	0.0252685	9.2179e-07	0.0342787	1.46423e-05	0.0446365	0.000110969	0.0555901	0.00043895	0.504695
109	0.33173	0.396564	0.815027	898511183	3605488	0.101489	0.0039967	0.025269	4.68713e-07	0.0342878	9.15794e-06	0.0447156	7.91044e-05	0.0559473	0.00035716	0.515271
110	0.332209	0.395396	0.814651	894842770	3668413	0.105157	0.00408277	0.0252692	2.20105e-07	0.0342934	5.5393e-06	0.0447706	5.50262e-05	0.056231	0.000283678	0.526366
111	0.332698	0.394201	0.813936	891109193	3733577	0.108891	0.00417233	0.0252693	1.12007e-07	0.0342966	3.24821e-06	0.044808	3.73731e-05	0.0564504	0.00021946	0.53791
112	0.333194	0.392986	0.812485	887320660	3788533	0.112679	0.00425148	0.0252694	3.78853e-08	0.0342984	1.8185e-06	0.0448327	2.47012e-05	0.0566151	0.000164725	0.548114
113	0.3337	0.391745	0.81263	883474639	3846021	0.116525	0.00433442	0.0252694	3.84602e-08	0.0342994	9.99965e-07	0.0448486	1.58841e-05	0.0567355	0.00012038	0.558806
114	0.334214	0.390479	0.811696	879565806	3908833	0.120434	0.00442439	0.0252694	0	0.0343	5.08148e-07	0.0448585	9.92844e-06	0.0568213	8.57598e-05	0.570403
115	0.334737	0.389188	0.810989	875598833	3966973	0.124401	0.00451015	0.0252694	0	0.0343002	2.38018e-07	0.0448645	5.99013e-06	0.0568808	5.95046e-05	0.58146
116	0.33527	0.387871	0.810454	871571764	4027069	0.128428	0.00459922	0.0252694	0	0.0343003	1.20812e-07	0.044868	3.50355e-06	0.0569211	4.0311e-05	0.592942
117	0.33581	0.38653	0.80981	867488630	4083134	0.132511	0.00468479	0.0252694	0	0.0343004	4.08313e-08	0.04487	1.9599e-06	0.0569477	2.6622e-05	0.603974
118	0.336361	0.385161	0.809268	863343862	4144768	0.136656	0.00477789	0.0252694	0	0.0343004	4.14477e-08	0.0448711	1.07764e-06	0.0569648	1.71179e-05	0.615976
119	0.336918	0.38377	0.808118	859149622	4194240	0.14085	0.00485813	0.0252694	0	0.0343004	0	0.0448716	5.45251e-07	0.0569755	1.06534e-05	0.626321
120	0.337485	0.382352	0.807536	854895890	4253732	0.145104	0.0049511	0.0252694	0	0.0343004	0	0.0448719	2.55224e-07	0.0569819	6.42314e-06	0.638306
