# Supplementary material for: Quantifying the Potential for Future Gene Therapy to Lower Lifetime Risk of Polygenic Late-Onset Diseases
Source: MDPI journal article supplement (doi:10.3390/ijms20133352), 2019-07-08
Supplement: s2 [file s2 › SuppFiles/Results/LODsCommonLow/ProstateCancer/-1.000/IndividualsByBetaDistrib.csv]

nEntry	Beta	nDetrimentalCount	nFractionPopulation	nCumulativeFractionPopulation	nEditsNeeded	nIndividuals
0	-19.8	0	0	1	0	0
1	-19.6	0	0	1	0	0
2	-19.4	0	0	1	0	0
3	-19.2	0	0	1	0	0
4	-19	0	0	1	0	0
5	-18.8	0	0	1	0	0
6	-18.6	0	0	1	0	0
7	-18.4	0	0	1	0	0
8	-18.2	0	0	1	0	0
9	-18	0	0	1	0	0
10	-17.8	0	0	1	0	0
11	-17.6	0	0	1	0	0
12	-17.4	0	0	1	0	0
13	-17.2	0	0	1	0	0
14	-17	0	0	1	0	0
15	-16.8	0	0	1	0	0
16	-16.6	0	0	1	0	0
17	-16.4	0	0	1	0	0
18	-16.2	0	0	1	0	0
19	-16	0	0	1	0	0
20	-15.8	0	0	1	0	0
21	-15.6	0	0	1	0	0
22	-15.4	0	0	1	0	0
23	-15.2	0	0	1	0	0
24	-15	0	0	1	0	0
25	-14.8	0	0	1	0	0
26	-14.6	0	0	1	0	0
27	-14.4	0	0	1	0	0
28	-14.2	0	0	1	0	0
29	-14	0	0	1	0	0
30	-13.8	0	0	1	0	0
31	-13.6	0	0	1	0	0
32	-13.4	0	0	1	0	0
33	-13.2	0	0	1	0	0
34	-13	0	0	1	0	0
35	-12.8	0	0	1	0	0
36	-12.6	0	0	1	0	0
37	-12.4	600.67	3e-09	1	0	3
38	-12.2	602	1e-09	1	0	1
39	-12	603.5	6e-09	1	0	6
40	-11.8	605.22	9e-09	0.99999999	0	9
41	-11.6	608.65	1.7e-08	0.99999998	0	17
42	-11.4	610.5	1.4e-08	0.99999996	0	14
43	-11.2	611.29	3.1e-08	0.99999995	0	31
44	-11	613.02	4.8e-08	0.99999992	0	48
45	-10.8	614.23	1.11e-07	0.99999987	0	111
46	-10.6	616.61	1.53e-07	0.99999976	0	153
47	-10.4	618.15	2.56e-07	0.99999961	0	256
48	-10.2	619.68	3.61e-07	0.99999935	0	361
49	-10	621.85	5.89e-07	0.99999899	0	589
50	-9.8	624.15	9.5e-07	0.9999984	0	950
51	-9.6	625.78	1.402e-06	0.99999745	0	1402
52	-9.4	627.54	2.258e-06	0.99999605	0	2258
53	-9.2	629.87	3.435e-06	0.99999379	0	3435
54	-9	631.76	5.17e-06	0.99999036	0	5170
55	-8.8	633.61	7.753e-06	0.99998519	0	7753
56	-8.6	635.37	1.1445e-05	0.99997743	0	11445
57	-8.4	637.24	1.6846e-05	0.99996599	0	16846
58	-8.2	639.28	2.4061e-05	0.99994914	0	24061
59	-8	641.13	3.5122e-05	0.99992508	0	35122
60	-7.8	643.04	4.9835e-05	0.99988996	0	49835
61	-7.6	644.97	7.0457e-05	0.99984012	0	70457
62	-7.4	646.86	9.7774e-05	0.99976967	0	97774
63	-7.2	648.73	0.000135859	0.99967189	0	135859
64	-7	650.63	0.000186605	0.99953603	0	186605
65	-6.8	652.55	0.000253996	0.99934943	0	253996
66	-6.6	654.42	0.00034077	0.99909543	0	340770
67	-6.4	656.35	0.000455191	0.99875466	0	455191
68	-6.2	658.24	0.000600821	0.99829947	0	600821
69	-6	660.12	0.000784546	0.99769865	0	784546
70	-5.8	662.03	0.001018794	0.9969141	0	1018794
71	-5.6	663.93	0.001311386	0.99589531	0	1311386
72	-5.4	665.82	0.001669637	0.99458393	0	1669637
73	-5.2	667.72	0.002106654	0.99291429	0	2106654
74	-5	669.63	0.002640049	0.99080763	0	2640049
75	-4.8	671.52	0.003265139	0.98816759	0	3265139
76	-4.6	673.41	0.004007783	0.98490245	0	4007783
77	-4.4	675.31	0.004877461	0.98089466	0	4877461
78	-4.2	677.21	0.005879663	0.9760172	0	5879663
79	-4	679.1	0.007024163	0.97013754	0	7024163
80	-3.8	681	0.008318642	0.96311338	0	8318642
81	-3.6	682.89	0.009752101	0.95479473	0	9752101
82	-3.4	684.79	0.011345901	0.94504263	0	11345901
83	-3.2	686.68	0.013063376	0.93369673	0	13063376
84	-3	688.58	0.01491885	0.92063336	0	14918850
85	-2.8	690.47	0.016873055	0.90571451	0	16873055
86	-2.6	692.36	0.018932299	0.88884145	0	18932299
87	-2.4	694.26	0.021050663	0.86990915	0	21050663
88	-2.2	696.15	0.023167076	0.84885849	0	23167076
89	-2	698.04	0.025297469	0.82569141	0	25297469
90	-1.8	699.94	0.02737372	0.80039394	0	27373720
91	-1.6	701.83	0.029352626	0.77302022	0	29352626
92	-1.4	703.72	0.031203853	0.7436676	0	31203853
93	-1.2	705.61	0.032866811	0.71246374	0	32866811
94	-1	707.5	0.03432212	0.67959693	0	34322120
95	-0.8	709.39	0.035524331	0.64527481	0	35524331
96	-0.6	711.29	0.036443732	0.60975048	0	36443732
97	-0.4	713.18	0.037077988	0.57330675	0	37077988
98	-0.2	715.07	0.037356935	0.53622876	0	37356935
99	0	716.96	0.037327655	0.49887183	0	37327655
100	0.2	718.85	0.036970245	0.46154417	1.8893	36970245
101	0.4	720.74	0.036304923	0.42457393	3.7782	36304923
102	0.6	722.63	0.035333712	0.38826901	5.6696	35333712
103	0.8	724.52	0.034086189	0.35293529	7.5579	34086189
104	1	726.41	0.032606797	0.3188491	9.4484	32606797
105	1.2	728.3	0.030924126	0.28624231	11.337	30924126
106	1.4	730.18	0.029063585	0.25531818	13.224	29063585
107	1.6	732.07	0.027082481	0.2262546	15.116	27082481
108	1.8	733.96	0.02501882	0.19917212	17.003	25018820
109	2	735.85	0.02291382	0.1741533	18.894	22913820
110	2.2	737.74	0.020798917	0.15123948	20.781	20798917
111	2.4	739.63	0.018722498	0.13044056	22.671	18722498
112	2.6	741.51	0.016709193	0.11171806	24.554	16709193
113	2.8	743.4	0.01478673	0.095008867	26.443	14786730
114	3	745.29	0.012970865	0.080222137	28.335	12970865
115	3.2	747.18	0.011286158	0.067251272	30.221	11286158
116	3.4	749.07	0.009722937	0.055965114	32.107	9722937
117	3.6	750.95	0.008321624	0.046242177	33.988	8321624
118	3.8	752.84	0.007054547	0.037920553	35.88	7054547
119	4	754.72	0.005927072	0.030866006	37.761	5927072
120	4.2	756.61	0.00494024	0.024938934	39.656	4940240
121	4.4	758.5	0.00407982	0.019998694	41.537	4079820
122	4.6	760.38	0.003342907	0.015918874	43.426	3342907
123	4.8	762.28	0.002718537	0.012575967	45.318	2718537
124	5	764.16	0.002187948	0.00985743	47.198	2187948
125	5.2	766.04	0.001749676	0.007669482	49.081	1749676
126	5.4	767.93	0.001383782	0.005919806	50.967	1383782
127	5.6	769.82	0.001088471	0.004536024	52.859	1088471
128	5.8	771.7	0.000848508	0.003447553	54.739	848508
129	6	773.56	0.000653358	0.002599045	56.603	653358
130	6.2	775.46	0.000500849	0.001945687	58.504	500849
131	6.4	777.34	0.000381035	0.001444838	60.382	381035
132	6.6	779.21	0.00028586	0.001063803	62.247	285860
133	6.8	781.14	0.000213869	0.000777943	64.181	213869
134	7	782.98	0.000157529	0.000564074	66.025	157529
135	7.2	784.89	0.000116186	0.000406545	67.928	116186
136	7.4	786.74	8.4358e-05	0.000290359	69.785	84358
137	7.6	788.68	6.1009e-05	0.000206001	71.725	61009
138	7.8	790.54	4.39e-05	0.000144992	73.577	43900
139	8	792.38	3.0963e-05	0.000101092	75.423	30963
140	8.2	794.25	2.1842e-05	7.0129e-05	77.296	21842
141	8.4	796.21	1.527e-05	4.8287e-05	79.253	15270
142	8.6	798.05	1.078e-05	3.3017e-05	81.094	10780
143	8.8	799.88	7.268e-06	2.2237e-05	82.917	7268
144	9	801.98	4.958e-06	1.4969e-05	85.021	4958
145	9.2	803.8	3.366e-06	1.0011e-05	86.844	3366
146	9.4	805.7	2.312e-06	6.645e-06	88.742	2312
147	9.6	807.76	1.525e-06	4.333e-06	90.804	1525
148	9.8	809.38	9.5e-07	2.808e-06	92.425	950
149	10	810.97	6.84e-07	1.858e-06	94.008	684
150	10.2	813.17	4.05e-07	1.174e-06	96.209	405
151	10.4	814.61	2.94e-07	7.69e-07	97.647	294
152	10.6	816.69	1.88e-07	4.75e-07	99.733	188
153	10.8	818.95	1.23e-07	2.87e-07	101.99	123
154	11	822.93	6.9e-08	1.64e-07	105.97	69
155	11.2	822.83	4.1e-08	9.5e-08	105.87	41
156	11.4	824.89	1.8e-08	5.4e-08	107.93	18
157	11.6	828.8	1e-08	3.6e-08	111.84	10
158	11.8	824	1.2e-08	2.6e-08	107.04	12
159	12	831.17	6e-09	1.4e-08	114.21	6
160	12.2	842	3e-09	8e-09	125.04	3
161	12.4	836	2e-09	5e-09	119.04	2
162	12.6	838.5	2e-09	3e-09	121.54	2
163	12.8	0	0	1e-09	0	0
164	13	0	0	1e-09	0	0
165	13.2	849	1e-09	1e-09	132.04	1
166	13.4	0	0	0	0	0
167	13.6	0	0	0	0	0
168	13.8	0	0	0	0	0
169	14	0	0	0	0	0
170	14.2	0	0	0	0	0
171	14.4	0	0	0	0	0
172	14.6	0	0	0	0	0
173	14.8	0	0	0	0	0
174	15	0	0	0	0	0
175	15.2	0	0	0	0	0
176	15.4	0	0	0	0	0
177	15.6	0	0	0	0	0
178	15.8	0	0	0	0	0
179	16	0	0	0	0	0
180	16.2	0	0	0	0	0
181	16.4	0	0	0	0	0
182	16.6	0	0	0	0	0
183	16.8	0	0	0	0	0
184	17	0	0	0	0	0
185	17.2	0	0	0	0	0
186	17.4	0	0	0	0	0
187	17.6	0	0	0	0	0
188	17.8	0	0	0	0	0
189	18	0	0	0	0	0
190	18.2	0	0	0	0	0
191	18.4	0	0	0	0	0
192	18.6	0	0	0	0	0
193	18.8	0	0	0	0	0
194	19	0	0	0	0	0
195	19.2	0	0	0	0	0
196	19.4	0	0	0	0	0
197	19.6	0	0	0	0	0
198	19.8	0	0	0	0	0
199	20	0	0	0	0	0
