# Supplementary material for: Quantifying the Potential for Future Gene Therapy to Lower Lifetime Risk of Polygenic Late-Onset Diseases
Source: MDPI journal article supplement (doi:10.3390/ijms20133352), 2019-07-08
Supplement: s2 [file s2 › SuppFiles/Results/LODsCommonLow/ProstateCancer/0.250/FrailtyAnalysis.csv]

Age	Heritability	MeanOR	CaseOR	nControls	nCases	nCumIncidence	nIncidence	nLifeIncidence0	nAbsIncidence0	nLifeIncidence5	nAbsIncidence5	nLifeIncidence10	nAbsIncidence10	nLifeIncidence15	nAbsIncidence15	nIncActDivExp
43	0.580343	0.250011	1	1000000000	0	0	0	0	0	0	0	0	0	0	0	0
44	0.580339	0.250007	26.1117	999996200	3800	3.8e-06	3.8e-06	3.61787e-06	3.61787e-06	3.65697e-06	3.65697e-06	3.6887e-06	3.6887e-06	3.71644e-06	3.71644e-06	0.249864
45	0.580329	0.249997	25.2839	999987570	8630	1.243e-05	8.63003e-06	1.18127e-05	8.19488e-06	1.19461e-05	8.28911e-06	1.20524e-05	8.36368e-06	1.21447e-05	8.42823e-06	0.25043
46	0.580312	0.24998	24.1328	999972408	15162	2.7592e-05	1.51622e-05	2.61693e-05	1.43566e-05	2.64798e-05	1.45337e-05	2.67221e-05	1.46697e-05	2.69307e-05	1.4786e-05	0.257826
47	0.580287	0.249953	23.0107	999949251	23157	5.0749e-05	2.31576e-05	4.80282e-05	2.18588e-05	4.86301e-05	2.21504e-05	4.90887e-05	2.23667e-05	4.94793e-05	2.25487e-05	0.258599
48	0.58025	0.249915	23.2564	999915775	33476	8.4225e-05	3.34777e-05	7.952e-05	3.14919e-05	8.05786e-05	3.19485e-05	8.13646e-05	3.22759e-05	8.2026e-05	3.25467e-05	0.260943
49	0.5802	0.249862	22.6029	999868665	47110	0.000131335	4.7114e-05	0.000123672	4.4152e-05	0.000125431	4.4852e-05	0.000126701	4.53368e-05	0.000127756	4.57301e-05	0.26617
50	0.580132	0.249791	21.9701	999805176	63489	0.000194824	6.34973e-05	0.00018293	5.92581e-05	0.000185719	6.02879e-05	0.000187683	6.09812e-05	0.000189286	6.15297e-05	0.266721
51	0.580043	0.249696	21.4272	999719791	85385	0.000280209	8.54016e-05	0.000262264	7.93338e-05	0.000266568	8.08493e-05	0.000269529	8.18466e-05	0.000271898	8.26125e-05	0.271709
52	0.579929	0.249572	20.3503	999606626	113165	0.000393374	0.000113197	0.000366884	0.00010462	0.000373389	0.000106821	0.000377775	0.000108246	0.000381201	0.000109303	0.276714
53	0.579782	0.249411	19.7235	999459105	147521	0.000540895	0.000147579	0.000502519	0.000135635	0.000512166	0.000138777	0.000518565	0.00014079	0.000523434	0.000142232	0.280483
54	0.579598	0.249206	18.8962	999269567	189538	0.000730433	0.000189641	0.000675742	0.000173223	0.000689803	0.000177637	0.000699018	0.000180453	0.000705837	0.000182404	0.283138
55	0.579366	0.248946	17.9259	999024919	244648	0.000975081	0.000244827	0.000897862	0.000222121	0.000918148	0.000228345	0.000931331	0.000232313	0.000940822	0.000234984	0.289944
56	0.579079	0.248618	17.1826	998714024	310895	0.00128598	0.000311198	0.00117811	0.000280247	0.00120701	0.000288862	0.00122571	0.00029438	0.00123883	0.000298012	0.29514
57	0.578729	0.248211	16.2525	998322967	391057	0.00167703	0.000391561	0.00152787	0.000349757	0.00156854	0.000361528	0.00159485	0.000369134	0.00161289	0.000374058	0.300334
58	0.578304	0.24771	15.4842	997835095	487872	0.0021649	0.000488692	0.00196052	0.00043265	0.0020171	0.000448564	0.0020538	0.000458956	0.0020785	0.00046561	0.306339
59	0.577796	0.247103	14.5702	997234424	600671	0.00276558	0.000601974	0.00248831	0.000527792	0.00256607	0.000548965	0.00261676	0.000562955	0.00265038	0.000571881	0.3119
60	0.577198	0.246376	13.7544	996504054	730370	0.00349595	0.000732395	0.00312374	0.000635429	0.00322918	0.000663118	0.00329845	0.000681698	0.00334393	0.000693545	0.317521
61	0.576498	0.245514	13.0117	995624689	879365	0.00437531	0.00088245	0.0038807	0.000756966	0.00402186	0.000792677	0.0041155	0.000817044	0.00417658	0.000832653	0.324364
62	0.575697	0.244515	12.2559	994587157	1037532	0.00541284	0.00104209	0.00476368	0.000882981	0.00494982	0.000927958	0.00507469	0.000959188	0.00515595	0.000979368	0.329342
63	0.574789	0.243367	11.5342	993374568	1212589	0.00662543	0.00121919	0.00578305	0.00101936	0.00602516	0.00107534	0.00618958	0.00111489	0.00629667	0.00114072	0.33616
64	0.573776	0.242072	10.8791	991981251	1393317	0.00801875	0.00140261	0.00693904	0.00115599	0.00724942	0.00122427	0.00746296	0.00127338	0.0076025	0.00130583	0.342449
65	0.572664	0.240635	10.2343	990407164	1574087	0.00959284	0.00158681	0.00822683	0.00128779	0.00861889	0.00136947	0.0088921	0.00142915	0.00907169	0.00146919	0.348151
66	0.571457	0.239063	9.66632	988652382	1754782	0.0113476	0.00177178	0.00964119	0.00141435	0.0101294	0.00151053	0.0104739	0.0015818	0.0107021	0.00163042	0.354339
67	0.570166	0.237369	9.14535	986726834	1925548	0.0132732	0.00194765	0.0111686	0.00152742	0.0117681	0.00163872	0.0121961	0.00172219	0.0124823	0.00178015	0.35984
68	0.568803	0.23557	8.65482	984644167	2082667	0.0153558	0.00211068	0.0127926	0.001624	0.0135189	0.00175079	0.014043	0.00184693	0.0143971	0.00191487	0.364716
69	0.567375	0.233677	8.21047	982411649	2232518	0.0175884	0.00226733	0.0145016	0.00170899	0.0153712	0.00185225	0.0160047	0.00196165	0.0164375	0.00204034	0.370487
70	0.565895	0.231707	7.78082	980044824	2366825	0.0199552	0.0024092	0.0162776	0.00177597	0.0173075	0.00193635	0.0180638	0.00205916	0.0185864	0.00214889	0.375889
71	0.564375	0.229678	7.38627	977561231	2483593	0.0224388	0.00253416	0.0181012	0.00182363	0.0193093	0.00200178	0.0202017	0.0021379	0.0208251	0.00223876	0.380693
72	0.562822	0.227602	7.02603	974973321	2587910	0.0250267	0.00264731	0.019957	0.00185579	0.0213621	0.00205283	0.0224041	0.00220241	0.0231397	0.0023146	0.385629
73	0.561244	0.225489	6.68703	972290369	2682952	0.0277096	0.00275182	0.0218318	0.00187479	0.0234542	0.00209209	0.0246596	0.00225542	0.025519	0.00237927	0.390998
74	0.559648	0.223352	6.38875	969529369	2761000	0.0304706	0.00283969	0.0237073	0.00187555	0.0255678	0.00211355	0.0269503	0.00229072	0.027945	0.00242601	0.395489
75	0.558044	0.221201	6.07444	966696929	2832440	0.0333031	0.00292146	0.0255729	0.00186561	0.0276931	0.00212535	0.0292676	0.00231728	0.0304092	0.00246425	0.400413
76	0.556438	0.219045	5.79285	963806710	2890219	0.0361933	0.00298979	0.0274136	0.00184066	0.0298153	0.0021222	0.0315971	0.00232952	0.0328972	0.00248793	0.404577
77	0.554829	0.216889	5.54822	960866163	2940547	0.0391338	0.00305097	0.0292184	0.00180482	0.031924	0.00210867	0.0339296	0.00233256	0.0353997	0.00250252	0.408684
78	0.553222	0.214738	5.29556	957877086	2989077	0.0421229	0.00311082	0.0309799	0.00176146	0.0340127	0.00208871	0.0362604	0.00233079	0.0379125	0.00251277	0.413356
79	0.551622	0.212595	5.07269	954849554	3027532	0.0451504	0.00316067	0.0326857	0.00170583	0.0360693	0.0020566	0.038578	0.00231758	0.0404243	0.00251185	0.417308
80	0.550027	0.210461	4.85518	951780478	3069076	0.0482195	0.0032142	0.0343315	0.00164579	0.0380908	0.00202148	0.0408809	0.00230291	0.0429352	0.00251087	0.42224
81	0.548445	0.208347	4.64731	948684767	3095711	0.0513152	0.00325255	0.0359034	0.00157188	0.0400623	0.00197153	0.043154	0.00227309	0.0454303	0.00249514	0.425578
82	0.54687	0.206245	4.46692	945556970	3127797	0.054443	0.00329698	0.0373983	0.00149493	0.0419821	0.00191975	0.0453969	0.00224294	0.0479114	0.00248109	0.430037
83	0.545305	0.204161	4.29664	942405108	3151862	0.0575949	0.00333334	0.0388067	0.00140841	0.0438395	0.00185739	0.0475994	0.00220246	0.0503692	0.00245773	0.433703
84	0.543755	0.202098	4.11805	939230195	3174913	0.0607698	0.00336895	0.0401231	0.00131635	0.0456283	0.00178887	0.0497561	0.00215672	0.0527995	0.0024304	0.43748
85	0.542214	0.200053	3.96581	936031581	3198614	0.0639684	0.00340557	0.0413433	0.00122021	0.0473436	0.00171526	0.0518629	0.0021068	0.0551997	0.00240011	0.441555
86	0.540686	0.198028	3.81318	932812026	3219555	0.067188	0.00343958	0.0424628	0.00111947	0.0489784	0.00163476	0.0539133	0.00205041	0.0575637	0.00236402	0.445425
87	0.539172	0.196025	3.67449	929576646	3235380	0.0704234	0.00346842	0.0434773	0.00101455	0.0505247	0.00154635	0.0558991	0.00198578	0.0598838	0.00232009	0.448731
88	0.537671	0.194045	3.54041	926326341	3250305	0.0736737	0.00349654	0.0443856	0.000908233	0.0519771	0.0014524	0.0578145	0.0019154	0.062155	0.00227125	0.45203
89	0.536181	0.192083	3.41474	923056022	3270319	0.076944	0.00353042	0.0451889	0.000803354	0.053333	0.00135591	0.0596571	0.00184263	0.0643766	0.00222153	0.45614
90	0.534706	0.190145	3.29376	919774340	3281682	0.0802257	0.00355524	0.0458869	0.000698014	0.0545849	0.0012519	0.0614169	0.0017598	0.0665381	0.00216151	0.459133
91	0.533242	0.188228	3.18787	916480427	3293913	0.0835196	0.00358122	0.0464833	0.000596429	0.0557302	0.00114533	0.0630895	0.00167252	0.0686358	0.00209776	0.46232
92	0.531792	0.186333	3.07668	913173495	3306932	0.0868265	0.0036083	0.0469836	0.000500273	0.0567672	0.00103699	0.06467	0.00158055	0.0706655	0.0020297	0.465681
93	0.530353	0.184459	2.97729	909853653	3319842	0.0901463	0.0036355	0.0473946	0.00041103	0.0576949	0.000927663	0.0661535	0.00148347	0.0726219	0.00195638	0.469086
94	0.528926	0.182606	2.87887	906523755	3329898	0.0934762	0.00365982	0.0477245	0.00032986	0.0585129	0.000817989	0.0675341	0.00138061	0.0744981	0.0018762	0.47214
95	0.527511	0.180776	2.79302	903186969	3336786	0.096813	0.00368086	0.0479825	0.000258034	0.0592226	0.000709734	0.068807	0.00127292	0.0762875	0.00178935	0.474788
96	0.526109	0.178968	2.70488	899843876	3343093	0.100156	0.00370144	0.048179	0.000196507	0.0598279	0.000605334	0.0699694	0.00116243	0.0779849	0.00169749	0.47739
97	0.524716	0.177177	2.62392	896486888	3356988	0.103513	0.00373063	0.048325	0.000145962	0.0603358	0.000507845	0.0710221	0.00105268	0.0795894	0.00160447	0.481114
98	0.523336	0.17541	2.54365	893126269	3360619	0.106874	0.00374865	0.0484302	0.000105187	0.0607519	0.000416078	0.0719612	0.000939058	0.0810911	0.00150169	0.483405
99	0.521966	0.173661	2.46977	889756205	3370064	0.110244	0.00377333	0.0485041	7.39392e-05	0.0610857	0.000333839	0.072789	0.000827856	0.0824884	0.00139726	0.486561
100	0.520607	0.171935	2.39709	886382651	3373554	0.113617	0.00379155	0.0485547	5.06033e-05	0.0613466	0.000260877	0.0735066	0.000717555	0.0837753	0.00128694	0.488889
101	0.51926	0.170228	2.32646	883001191	3381460	0.116999	0.0038149	0.0485886	3.38484e-05	0.0615453	0.000198762	0.0741189	0.000612281	0.0849511	0.00117577	0.491884
102	0.517924	0.168543	2.2594	879615702	3385489	0.120384	0.00383407	0.0486107	2.20734e-05	0.0616925	0.000147201	0.074631	0.000512157	0.0860127	0.00106162	0.494343
103	0.5166	0.166878	2.19655	876227072	3388630	0.123773	0.0038524	0.0486247	1.3995e-05	0.0617986	0.000106064	0.0750506	0.000419546	0.0869596	0.000946885	0.496696
104	0.515286	0.165232	2.13788	872835197	3391875	0.127165	0.003871	0.0486333	8.61536e-06	0.061873	7.44177e-05	0.0753866	0.000335999	0.0877928	0.000833214	0.499086
105	0.513981	0.163604	2.08125	869437523	3397674	0.130562	0.00389269	0.0486384	5.13049e-06	0.061924	5.09651e-05	0.0756493	0.000262742	0.0885155	0.000722685	0.501876
106	0.512681	0.161993	2.02883	866033359	3404164	0.133967	0.00391536	0.0486414	2.96162e-06	0.0619581	3.40757e-05	0.0758494	0.000200097	0.0891319	0.000616392	0.504795
107	0.511398	0.160405	1.9712	862633509	3399850	0.137366	0.00392577	0.048643	1.63193e-06	0.0619802	2.2167e-05	0.0759972	0.000147825	0.0896462	0.000514329	0.506133
108	0.510122	0.158834	1.92047	859227456	3406053	0.140773	0.00394844	0.0486439	8.85574e-07	0.0619943	1.4067e-05	0.0761038	0.000106609	0.0900679	0.000421703	0.509051
109	0.508856	0.157281	1.86759	855813447	3414009	0.144187	0.00397335	0.0486443	4.43821e-07	0.062003	8.67158e-06	0.0761787	7.49034e-05	0.0904061	0.000338192	0.512261
110	0.507599	0.155746	1.82243	852402860	3410587	0.147597	0.0039852	0.0486445	2.04635e-07	0.0620081	5.14999e-06	0.0762299	5.11588e-05	0.0906698	0.000263741	0.513787
111	0.506351	0.15423	1.77899	848992352	3410508	0.151008	0.00400105	0.0486446	1.02315e-07	0.0620111	2.96714e-06	0.076264	3.41392e-05	0.0908703	0.00020047	0.515829
112	0.505113	0.152732	1.73294	845581411	3410941	0.154419	0.00401763	0.0486447	3.41094e-08	0.0620127	1.63725e-06	0.0762863	2.22393e-05	0.0910186	0.000148308	0.517966
113	0.503885	0.151252	1.69152	842171541	3409870	0.157828	0.00403257	0.0486447	3.40987e-08	0.0620136	8.86566e-07	0.0763004	1.40828e-05	0.0911253	0.000106729	0.519891
114	0.502664	0.149789	1.65052	838760045	3411496	0.16124	0.00405083	0.0486447	0	0.0620141	4.43494e-07	0.076309	8.6652e-06	0.0912002	7.48482e-05	0.522244
115	0.501452	0.148343	1.61067	835347253	3412792	0.164653	0.00406885	0.0486447	0	0.0620143	2.04768e-07	0.0763142	5.15332e-06	0.0912514	5.11919e-05	0.524567
116	0.500249	0.146914	1.57407	831938306	3408947	0.168062	0.00408087	0.0486447	0	0.0620144	1.02268e-07	0.0763172	2.96578e-06	0.0912855	3.41236e-05	0.526116
117	0.499057	0.145503	1.53355	828529499	3408807	0.171471	0.00409743	0.0486447	0	0.0620144	3.40881e-08	0.0763188	1.63623e-06	0.0913077	2.22254e-05	0.52825
118	0.49787	0.144106	1.50148	825119623	3409876	0.17488	0.00411558	0.0486447	0	0.0620144	3.40988e-08	0.0763197	8.86568e-07	0.0913218	1.40828e-05	0.530589
119	0.496692	0.142727	1.4664	821713222	3406401	0.178287	0.00412837	0.0486447	0	0.0620144	0	0.0763201	4.42832e-07	0.0913305	8.65226e-06	0.532239
120	0.495522	0.141363	1.43514	818308804	3404418	0.181691	0.00414307	0.0486447	0	0.0620144	0	0.0763203	2.04265e-07	0.0913356	5.14067e-06	0.534134
