# Supplementary material for: Quantifying the Potential for Future Gene Therapy to Lower Lifetime Risk of Polygenic Late-Onset Diseases
Source: MDPI journal article supplement (doi:10.3390/ijms20133352), 2019-07-08
Supplement: s2 [file s2 › SuppFiles/Results/LODsCommonLow/ProstateCancer/0.250/IndividualsByBetaDistrib.csv]

nEntry	Beta	nDetrimentalCount	nFractionPopulation	nCumulativeFractionPopulation	nEditsNeeded	nIndividuals
0	-19.8	0	0	1	0	0
1	-19.6	0	0	1	0	0
2	-19.4	0	0	1	0	0
3	-19.2	0	0	1	0	0
4	-19	0	0	1	0	0
5	-18.8	0	0	1	0	0
6	-18.6	0	0	1	0	0
7	-18.4	0	0	1	0	0
8	-18.2	0	0	1	0	0
9	-18	0	0	1	0	0
10	-17.8	0	0	1	0	0
11	-17.6	0	0	1	0	0
12	-17.4	0	0	1	0	0
13	-17.2	0	0	1	0	0
14	-17	0	0	1	0	0
15	-16.8	0	0	1	0	0
16	-16.6	0	0	1	0	0
17	-16.4	0	0	1	0	0
18	-16.2	0	0	1	0	0
19	-16	0	0	1	0	0
20	-15.8	0	0	1	0	0
21	-15.6	0	0	1	0	0
22	-15.4	0	0	1	0	0
23	-15.2	0	0	1	0	0
24	-15	0	0	1	0	0
25	-14.8	0	0	1	0	0
26	-14.6	0	0	1	0	0
27	-14.4	0	0	1	0	0
28	-14.2	0	0	1	0	0
29	-14	0	0	1	0	0
30	-13.8	0	0	1	0	0
31	-13.6	0	0	1	0	0
32	-13.4	0	0	1	0	0
33	-13.2	0	0	1	0	0
34	-13	600	1e-09	1	0	1
35	-12.8	0	0	1	0	0
36	-12.6	0	0	1	0	0
37	-12.4	593	3e-09	1	0	3
38	-12.2	603.5	2e-09	1	0	2
39	-12	608.38	8e-09	0.99999999	0	8
40	-11.8	600.5	6e-09	0.99999999	0	6
41	-11.6	607.53	1.7e-08	0.99999998	0	17
42	-11.4	610.23	2.2e-08	0.99999996	0	22
43	-11.2	611.62	2.9e-08	0.99999994	0	29
44	-11	612.05	4e-08	0.99999991	0	40
45	-10.8	615.26	8.7e-08	0.99999987	0	87
46	-10.6	616.18	1.44e-07	0.99999978	0	144
47	-10.4	618.57	2.21e-07	0.99999964	0	221
48	-10.2	620.2	3.93e-07	0.99999942	0	393
49	-10	622.3	5.72e-07	0.99999903	0	572
50	-9.8	624.9	9.3e-07	0.99999845	0	930
51	-9.6	625.9	1.543e-06	0.99999753	0	1543
52	-9.4	627.64	2.283e-06	0.99999598	0	2283
53	-9.2	629.84	3.461e-06	0.9999937	0	3461
54	-9	631.58	5.145e-06	0.99999024	0	5145
55	-8.8	633.62	7.938e-06	0.99998509	0	7938
56	-8.6	635.49	1.1158e-05	0.99997715	0	11158
57	-8.4	637.29	1.6809e-05	0.999966	0	16809
58	-8.2	639.24	2.4333e-05	0.99994919	0	24333
59	-8	641.13	3.4857e-05	0.99992485	0	34857
60	-7.8	643.04	5.0021e-05	0.99989	0	50021
61	-7.6	644.95	6.9961e-05	0.99983998	0	69961
62	-7.4	646.86	9.7882e-05	0.99977002	0	97882
63	-7.2	648.74	0.000136185	0.99967213	0	136185
64	-7	650.64	0.00018636	0.99953595	0	186360
65	-6.8	652.52	0.000253193	0.99934959	0	253193
66	-6.6	654.45	0.000340543	0.9990964	0	340543
67	-6.4	656.34	0.00045543	0.99875585	0	455430
68	-6.2	658.23	0.000600163	0.99830042	0	600163
69	-6	660.12	0.000786731	0.99770026	0	786731
70	-5.8	662.02	0.001022199	0.99691353	0	1022199
71	-5.6	663.94	0.001313186	0.99589133	0	1313186
72	-5.4	665.82	0.001671005	0.99457814	0	1671005
73	-5.2	667.72	0.002107036	0.99290714	0	2107036
74	-5	669.62	0.002636294	0.9908001	0	2636294
75	-4.8	671.51	0.003268677	0.98816381	0	3268677
76	-4.6	673.41	0.004009587	0.98489513	0	4009587
77	-4.4	675.31	0.004878231	0.98088555	0	4878231
78	-4.2	677.21	0.005881839	0.97600731	0	5881839
79	-4	679.1	0.007026242	0.97012548	0	7026242
80	-3.8	680.99	0.008312356	0.96309923	0	8312356
81	-3.6	682.89	0.009758053	0.95478688	0	9758053
82	-3.4	684.79	0.011339227	0.94502882	0	11339227
83	-3.2	686.68	0.013065943	0.9336896	0	13065943
84	-3	688.57	0.014915436	0.92062365	0	14915436
85	-2.8	690.47	0.016881622	0.90570822	0	16881622
86	-2.6	692.36	0.018936882	0.8888266	0	18936882
87	-2.4	694.26	0.02104654	0.86988971	0	21046540
88	-2.2	696.15	0.023165703	0.84884317	0	23165703
89	-2	698.04	0.025286701	0.82567747	0	25286701
90	-1.8	699.94	0.027369162	0.80039077	0	27369162
91	-1.6	701.83	0.029353255	0.77302161	0	29353255
92	-1.4	703.72	0.031195311	0.74366835	0	31195311
93	-1.2	705.61	0.032868988	0.71247304	0	32868988
94	-1	707.5	0.034327349	0.67960405	0	34327349
95	-0.8	709.4	0.035531226	0.64527671	0	35531226
96	-0.6	711.29	0.03644882	0.60974548	0	36448820
97	-0.4	713.18	0.037058766	0.57329666	0	37058766
98	-0.2	715.07	0.037365325	0.53623789	0	37365325
99	0	716.96	0.03732838	0.49887257	0	37328380
100	0.2	718.85	0.036984212	0.46154419	1.8925	36984212
101	0.4	720.74	0.036305142	0.42455998	3.7796	36305142
102	0.6	722.63	0.035335302	0.38825483	5.6703	35335302
103	0.8	724.52	0.034093365	0.35291953	7.5584	34093365
104	1	726.41	0.032610729	0.31882617	9.4509	32610729
105	1.2	728.3	0.030915515	0.28621544	11.341	30915515
106	1.4	730.19	0.029056286	0.25529992	13.228	29056286
107	1.6	732.08	0.027084867	0.22624364	15.118	27084867
108	1.8	733.96	0.025012181	0.19915877	17.004	25012181
109	2	735.85	0.022911998	0.17414659	18.894	22911998
110	2.2	737.74	0.020796448	0.15123459	20.783	20796448
111	2.4	739.63	0.018723051	0.13043814	22.67	18723051
112	2.6	741.52	0.016717327	0.11171509	24.559	16717327
113	2.8	743.4	0.014784873	0.094997765	26.446	14784873
114	3	745.29	0.012967548	0.080212892	28.333	12967548
115	3.2	747.18	0.011280683	0.067245344	30.224	11280683
116	3.4	749.07	0.009730078	0.055964661	32.108	9730078
117	3.6	750.95	0.008319986	0.046234583	33.994	8319986
118	3.8	752.84	0.007056922	0.037914597	35.883	7056922
119	4	754.72	0.005924764	0.030857675	37.766	5924764
120	4.2	756.62	0.004936698	0.024932911	39.658	4936698
121	4.4	758.49	0.004083808	0.019996213	41.537	4083808
122	4.6	760.37	0.003340151	0.015912405	43.417	3340151
123	4.8	762.27	0.00271725	0.012572254	45.314	2717250
124	5	764.16	0.002188636	0.009855004	47.199	2188636
125	5.2	766.04	0.001746655	0.007666368	49.079	1746655
126	5.4	767.93	0.001383436	0.005919713	50.972	1383436
127	5.6	769.81	0.001087448	0.004536277	52.853	1087448
128	5.8	771.71	0.000847446	0.003448829	54.748	847446
129	6	773.58	0.000652636	0.002601383	56.62	652636
130	6.2	775.46	0.000500954	0.001948747	58.503	500954
131	6.4	777.34	0.000380889	0.001447793	60.385	380889
132	6.6	779.22	0.000286595	0.001066904	62.265	286595
133	6.8	781.12	0.000213529	0.000780309	64.162	213529
134	7	782.99	0.000158659	0.00056678	66.037	158659
135	7.2	784.91	0.000116598	0.000408121	67.949	116598
136	7.4	786.77	8.4729e-05	0.000291523	69.813	84729
137	7.6	788.62	6.1392e-05	0.000206794	71.659	61392
138	7.8	790.58	4.3904e-05	0.000145402	73.625	43904
139	8	792.41	3.1131e-05	0.000101498	75.452	31131
140	8.2	794.3	2.198e-05	7.0367e-05	77.346	21980
141	8.4	796.18	1.5302e-05	4.8387e-05	79.218	15302
142	8.6	798.08	1.0682e-05	3.3085e-05	81.123	10682
143	8.8	799.98	7.336e-06	2.2403e-05	83.024	7336
144	9	801.99	5.024e-06	1.5067e-05	85.037	5024
145	9.2	803.67	3.418e-06	1.0043e-05	86.712	3418
146	9.4	805.73	2.24e-06	6.625e-06	88.772	2240
147	9.6	807.44	1.571e-06	4.385e-06	90.487	1571
148	9.8	809.54	9.79e-07	2.814e-06	92.578	979
149	10	811.11	6.9e-07	1.835e-06	94.15	690
150	10.2	813.26	4.1e-07	1.145e-06	96.304	410
151	10.4	815.15	2.88e-07	7.35e-07	98.192	288
152	10.6	816.94	1.76e-07	4.47e-07	99.98	176
153	10.8	819.09	1.05e-07	2.71e-07	102.13	105
154	11	822.07	7.5e-08	1.66e-07	105.11	75
155	11.2	822.81	3.2e-08	9.1e-08	105.86	32
156	11.4	824.04	2.7e-08	5.9e-08	107.08	27
157	11.6	824.73	1.5e-08	3.2e-08	107.78	15
158	11.8	828.83	6e-09	1.7e-08	111.88	6
159	12	827.25	4e-09	1.1e-08	110.29	4
160	12.2	834.5	4e-09	7e-09	117.54	4
161	12.4	835	2e-09	3e-09	118.04	2
162	12.6	0	0	1e-09	0	0
163	12.8	835	1e-09	1e-09	118.04	1
164	13	0	0	0	0	0
165	13.2	0	0	0	0	0
166	13.4	0	0	0	0	0
167	13.6	0	0	0	0	0
168	13.8	0	0	0	0	0
169	14	0	0	0	0	0
170	14.2	0	0	0	0	0
171	14.4	0	0	0	0	0
172	14.6	0	0	0	0	0
173	14.8	0	0	0	0	0
174	15	0	0	0	0	0
175	15.2	0	0	0	0	0
176	15.4	0	0	0	0	0
177	15.6	0	0	0	0	0
178	15.8	0	0	0	0	0
179	16	0	0	0	0	0
180	16.2	0	0	0	0	0
181	16.4	0	0	0	0	0
182	16.6	0	0	0	0	0
183	16.8	0	0	0	0	0
184	17	0	0	0	0	0
185	17.2	0	0	0	0	0
186	17.4	0	0	0	0	0
187	17.6	0	0	0	0	0
188	17.8	0	0	0	0	0
189	18	0	0	0	0	0
190	18.2	0	0	0	0	0
191	18.4	0	0	0	0	0
192	18.6	0	0	0	0	0
193	18.8	0	0	0	0	0
194	19	0	0	0	0	0
195	19.2	0	0	0	0	0
196	19.4	0	0	0	0	0
197	19.6	0	0	0	0	0
198	19.8	0	0	0	0	0
199	20	0	0	0	0	0
