# Supplementary material for: Quantifying the Potential for Future Gene Therapy to Lower Lifetime Risk of Polygenic Late-Onset Diseases
Source: MDPI journal article supplement (doi:10.3390/ijms20133352), 2019-07-08
Supplement: s2 [file s2 › SuppFiles/Results/LODsCommonLow/ProstateCancer/1.000/FrailtyAnalysis.csv]

Age	Heritability	MeanOR	CaseOR	nControls	nCases	nCumIncidence	nIncidence	nLifeIncidence0	nAbsIncidence0	nLifeIncidence5	nAbsIncidence5	nLifeIncidence10	nAbsIncidence10	nLifeIncidence15	nAbsIncidence15	nIncActDivExp
43	0.580325	1.00012	1	1000000000	0	0	0	0	0	0	0	0	0	0	0	0
44	0.580308	1.00005	97.0673	999985028	14972	1.4972e-05	1.4972e-05	1.42544e-05	1.42544e-05	1.44085e-05	1.44085e-05	1.45335e-05	1.45335e-05	1.46428e-05	1.46428e-05	0.984464
45	0.580271	0.99989	92.3909	999950291	34737	4.9709e-05	3.47375e-05	4.724e-05	3.29856e-05	4.77733e-05	3.33649e-05	4.81985e-05	3.3665e-05	4.85676e-05	3.39248e-05	1.00803
46	0.580208	0.999626	89.3735	999891361	58930	0.000108639	5.89329e-05	0.00010304	5.57996e-05	0.000104261	5.64879e-05	0.000105215	5.70165e-05	0.000106036	5.74685e-05	1.00213
47	0.580115	0.999229	84.5076	999801951	89410	0.000198049	8.94197e-05	0.000187437	8.43977e-05	0.000189785	8.55233e-05	0.000191573	8.63584e-05	0.000193097	8.70612e-05	0.998539
48	0.579985	0.998663	81.8725	999673452	128499	0.000326548	0.000128524	0.00030832	0.000120883	0.00031242	0.000122636	0.000315466	0.000123892	0.000318029	0.000124932	1.00179
49	0.579812	0.997897	76.323	999496525	176927	0.000503475	0.000176985	0.000474138	0.000165818	0.000480867	0.000168447	0.000485733	0.000170267	0.000489774	0.000171745	0.999872
50	0.579586	0.99688	72.3579	999258587	237938	0.000741413	0.000238058	0.00069622	0.000222082	0.000706808	0.000225941	0.000714273	0.000228539	0.000720369	0.000230595	0.999964
51	0.579299	0.995557	68.0664	998944575	314012	0.00105543	0.000314245	0.000987978	0.000291758	0.00100414	0.000297332	0.00101527	0.000300999	0.00102419	0.000303816	0.999784
52	0.578936	0.993859	63.9479	998534999	409576	0.001465	0.000410009	0.00136663	0.000378649	0.00139076	0.000386615	0.00140704	0.000391772	0.00141978	0.000395597	1.00228
53	0.578486	0.991715	59.9106	998009268	525731	0.00199073	0.000526502	0.00185	0.000483373	0.00188533	0.000494571	0.00190879	0.000501742	0.00192667	0.000506884	1.00065
54	0.577937	0.989039	55.8146	997340659	668609	0.00265934	0.000669943	0.00246105	0.000611055	0.00251195	0.000626627	0.00254535	0.000636563	0.00257011	0.000643443	1.00024
55	0.577272	0.985736	51.8103	996498547	842112	0.00350145	0.000844357	0.00322562	0.00076457	0.00329795	0.000785994	0.003345	0.000799653	0.00337896	0.000808849	0.999956
56	0.576476	0.981696	47.9981	995446326	1052221	0.00455367	0.00105592	0.00417412	0.000948493	0.0042756	0.00097765	0.00434133	0.000996327	0.00438757	0.00100862	1.00143
57	0.57553	0.97681	44.5021	994145789	1300537	0.00585421	0.00130649	0.00533731	0.00116319	0.00547793	0.00120233	0.00556896	0.00122763	0.00563158	0.001244	1.0021
58	0.574426	0.970997	40.9513	992559945	1585844	0.00744006	0.00159518	0.00674365	0.00140634	0.006936	0.00145807	0.00706081	0.00149185	0.00714506	0.00151348	0.999948
59	0.573146	0.964136	37.8619	990642470	1917475	0.00935753	0.00193185	0.00842848	0.00168483	0.00868842	0.00175242	0.00885788	0.00179708	0.00897063	0.00182557	1.00095
60	0.57168	0.956159	34.9846	988356257	2286213	0.0116437	0.00230781	0.0104175	0.00198903	0.0107641	0.0020757	0.0109917	0.00213386	0.0111416	0.00217094	1.00052
61	0.570025	0.947025	32.1474	985664639	2691618	0.0143354	0.00272333	0.0127345	0.00231697	0.0131904	0.00242628	0.0134926	0.00250086	0.0136902	0.00254864	1.00102
62	0.568181	0.936725	29.6437	982544384	3120255	0.0174556	0.00316564	0.0153899	0.00265546	0.0159811	0.00279072	0.0163773	0.00288464	0.0166355	0.00294533	1.00047
63	0.566151	0.92529	27.3961	978982324	3562060	0.0210177	0.00362534	0.0183844	0.00299445	0.01914	0.00315887	0.0196523	0.00327506	0.0199865	0.00335094	0.999597
64	0.563943	0.912781	25.3245	974972514	4009810	0.0250275	0.0040959	0.0217112	0.00332682	0.0226633	0.0035233	0.023317	0.00366465	0.0237445	0.00375803	1.00002
65	0.561573	0.899298	23.4527	970523495	4449019	0.0294765	0.00456323	0.025351	0.00363983	0.026534	0.00387069	0.0273563	0.00403935	0.0278971	0.00415254	1.00118
66	0.559063	0.885009	21.744	965668015	4855480	0.034332	0.00500295	0.0292646	0.00391352	0.0307136	0.00417965	0.0317331	0.00437683	0.0324084	0.00451137	1.00054
67	0.556431	0.870058	20.226	960438541	5229474	0.0395615	0.0054154	0.0334128	0.00414823	0.0351641	0.00445049	0.0364103	0.00467719	0.037243	0.0048346	1.00053
68	0.553702	0.854622	18.8402	954880119	5558422	0.0451199	0.00578738	0.0377471	0.00433429	0.0398368	0.00467269	0.0413396	0.00492926	0.0423536	0.00511058	1.00003
69	0.550896	0.838848	17.6032	949035934	5844185	0.0509641	0.00612033	0.0422208	0.00447372	0.0446856	0.00484874	0.0464747	0.00513511	0.0476947	0.00534112	1.00007
70	0.548037	0.8229	16.4374	942952324	6083610	0.0570477	0.00641031	0.0467857	0.0045649	0.0496627	0.00497712	0.0517675	0.0052928	0.0532181	0.00552343	1.00015
71	0.545144	0.806901	15.3928	936673171	6279153	0.0633268	0.00665904	0.0513963	0.00461059	0.0547237	0.005061	0.0571727	0.00540516	0.0588783	0.00566015	1.00035
72	0.542234	0.790966	14.4411	930241241	6431930	0.0697588	0.00686678	0.0560086	0.00461234	0.0598257	0.00510206	0.0626465	0.00547383	0.064631	0.00575265	1.00027
73	0.539322	0.775186	13.5619	923690662	6550579	0.0763093	0.00704181	0.060586	0.00457741	0.0649337	0.00510794	0.0681532	0.00550674	0.0704401	0.00580912	1.00055
74	0.536424	0.759642	12.7471	917056432	6634230	0.0829436	0.00718231	0.0650927	0.00450663	0.0700122	0.0050785	0.0736575	0.00550422	0.0762694	0.0058293	1.00029
75	0.533549	0.74439	12.004	910367073	6689359	0.0896329	0.00729438	0.0694987	0.00440601	0.0750316	0.00501943	0.0791302	0.0054727	0.0820892	0.00581981	0.999762
76	0.530701	0.72945	11.3263	903637185	6729888	0.0963628	0.0073925	0.0737847	0.004286	0.0799732	0.00494155	0.0845544	0.00542429	0.0878823	0.00579315	1.00035
77	0.527892	0.714863	10.6881	896888731	6748454	0.103111	0.0074681	0.0779267	0.004142	0.0848125	0.00483932	0.0899076	0.00535314	0.0936255	0.0057432	1.00037
78	0.525125	0.700653	10.1011	890139913	6748818	0.10986	0.0075247	0.0819038	0.00397708	0.0895284	0.00471594	0.0951701	0.00526253	0.0992989	0.00567339	0.99986
79	0.522402	0.68681	9.56293	883395512	6744401	0.116604	0.00757679	0.0857038	0.00380007	0.0941099	0.00458147	0.100333	0.00516284	0.104895	0.00559563	1.00038
80	0.519726	0.673353	9.06056	876670465	6725047	0.12333	0.00761272	0.0893101	0.00360631	0.0985394	0.00442952	0.105379	0.00504621	0.110396	0.0055019	1.00006
81	0.517101	0.660274	8.5977	869970931	6699534	0.130029	0.00764202	0.0927119	0.00340176	0.102806	0.00426667	0.110298	0.00491927	0.115796	0.00539982	0.999916
82	0.514521	0.647565	8.17953	863303694	6667237	0.136696	0.00766375	0.0958985	0.00318661	0.106898	0.00409215	0.11508	0.00478108	0.121085	0.00528872	0.99961
83	0.511994	0.63523	7.77279	856674350	6629344	0.143326	0.00767904	0.0988608	0.00296232	0.110805	0.00390667	0.119712	0.00463245	0.126254	0.00516936	0.999124
84	0.509512	0.623231	7.40246	850072695	6601655	0.149927	0.00770614	0.101598	0.00273711	0.114525	0.00371964	0.124196	0.0044845	0.131308	0.00505357	1.00069
85	0.507078	0.611583	7.06561	843518370	6554325	0.156482	0.00771031	0.104098	0.00250034	0.118039	0.00351476	0.128514	0.00431707	0.136226	0.0049181	0.999694
86	0.504691	0.600263	6.74095	837002323	6516047	0.162998	0.00772484	0.106364	0.00226569	0.121348	0.00330859	0.132663	0.00414981	0.141011	0.00478454	1.00037
87	0.50235	0.589265	6.43938	830530026	6472297	0.16947	0.00773271	0.108394	0.00202958	0.124441	0.00309343	0.136636	0.0039725	0.145652	0.00464128	1.00043
88	0.500053	0.578578	6.16316	824104412	6425614	0.175896	0.00773676	0.110189	0.00179551	0.127313	0.00287129	0.140422	0.00378661	0.150142	0.00449009	1.0002
89	0.497795	0.568182	5.91009	817724149	6380263	0.182276	0.00774206	0.111756	0.00156731	0.129958	0.00264532	0.144017	0.0035949	0.154476	0.00433411	1.0003
90	0.495582	0.558073	5.65989	811387545	6336604	0.188612	0.00774907	0.113104	0.0013478	0.132375	0.00241729	0.147415	0.003398	0.15865	0.00417367	1.00074
91	0.493408	0.54824	5.43642	805100729	6286816	0.194899	0.00774823	0.114243	0.00113835	0.134561	0.00218599	0.150608	0.00319219	0.162654	0.00400382	1.00026
92	0.491273	0.538682	5.21957	798865325	6235404	0.201135	0.00774487	0.115186	0.000943292	0.136516	0.0019553	0.153588	0.00298021	0.166481	0.0038271	0.999542
93	0.489177	0.529372	5.01736	792673015	6192310	0.207327	0.00775138	0.115952	0.00076667	0.138247	0.00173032	0.156355	0.00276703	0.17013	0.00364913	1.00016
94	0.487117	0.520311	4.82829	786529877	6143138	0.21347	0.0077499	0.116561	0.000608539	0.139756	0.00150906	0.158902	0.00254701	0.173591	0.00346129	0.999787
95	0.485092	0.511479	4.64741	780428206	6101671	0.219572	0.00775771	0.117033	0.000471842	0.141054	0.00129783	0.161229	0.00232767	0.176863	0.00327202	1.00065
96	0.483101	0.50288	4.47903	774377153	6051053	0.225623	0.0077535	0.117389	0.000355681	0.142149	0.00109566	0.163333	0.00210401	0.179936	0.00307248	1
97	0.481142	0.494497	4.32152	768372111	6005042	0.231628	0.00775467	0.11765	0.000261099	0.143058	0.000908443	0.165217	0.00188306	0.182806	0.00287011	1.00007
98	0.479216	0.486327	4.16929	762414540	5957571	0.237585	0.0077535	0.117836	0.000186472	0.143795	0.000737607	0.166881	0.00166472	0.185468	0.00266214	0.999846
99	0.477315	0.478345	4.03128	756494769	5919771	0.243505	0.0077645	0.117966	0.00012988	0.144382	0.000586413	0.168335	0.00145419	0.187922	0.0024544	1.00121
100	0.475448	0.47057	3.89112	750626807	5867962	0.249373	0.00775678	0.118054	8.80194e-05	0.144836	0.00045377	0.169584	0.00124812	0.190161	0.00223851	1.00017
101	0.473607	0.46298	3.76494	744802812	5823995	0.255197	0.00775884	0.118112	5.82982e-05	0.145178	0.000342334	0.170638	0.00105455	0.192186	0.00202506	1.00041
102	0.471798	0.455579	3.63955	739027004	5775808	0.260973	0.00775481	0.11815	3.76583e-05	0.145429	0.000251132	0.171512	0.000873764	0.193997	0.00181118	0.999861
103	0.470011	0.448345	3.52543	733290822	5736182	0.266709	0.0077618	0.118174	2.36904e-05	0.145609	0.000179542	0.172222	0.000710197	0.1956	0.00160286	1.00074
104	0.468252	0.441283	3.41333	727600005	5690817	0.2724	0.00776065	0.118188	1.44547e-05	0.145733	0.000124857	0.172786	0.000563732	0.196998	0.00139795	1.00058
105	0.466518	0.434387	3.30992	721956572	5643433	0.278043	0.00775623	0.118197	8.52158e-06	0.145818	8.46515e-05	0.173222	0.000436407	0.198198	0.00120036	0.999995
106	0.464809	0.427651	3.20804	716357167	5599405	0.283643	0.00775588	0.118202	4.87148e-06	0.145874	5.605e-05	0.173551	0.000329133	0.199212	0.00101388	0.999939
107	0.463122	0.421061	3.11372	710797371	5559796	0.289203	0.00776121	0.118204	2.6687e-06	0.14591	3.62499e-05	0.173793	0.00024174	0.200053	0.000841086	1.00062
108	0.461457	0.414624	3.02309	705285016	5512355	0.294715	0.00775517	0.118206	1.43321e-06	0.145933	2.2766e-05	0.173966	0.000172537	0.200736	0.000682485	0.999834
109	0.459818	0.408329	2.93084	699810644	5474372	0.300189	0.00776193	0.118206	7.11668e-07	0.145947	1.39049e-05	0.174086	0.000120108	0.201278	0.000542291	1.0007
110	0.458199	0.402171	2.85039	694380169	5430475	0.30562	0.00775992	0.118207	3.25829e-07	0.145955	8.20002e-06	0.174167	8.14571e-05	0.201698	0.000419939	1.00044
111	0.456601	0.396146	2.77085	688992295	5387874	0.311008	0.00775926	0.118207	1.61636e-07	0.14596	4.68745e-06	0.174221	5.39326e-05	0.202015	0.000316699	1.00035
112	0.455023	0.390253	2.69271	683645367	5346928	0.316355	0.0077605	0.118207	5.34693e-08	0.145963	2.56653e-06	0.174256	3.4862e-05	0.202247	0.000232484	1.00051
113	0.453465	0.384483	2.62018	678339572	5305795	0.32166	0.00776103	0.118207	5.3058e-08	0.145964	1.37951e-06	0.174278	2.19129e-05	0.202413	0.000166071	1.00057
114	0.451926	0.378839	2.54808	673076139	5263433	0.326924	0.00775929	0.118207	0	0.145965	6.84246e-07	0.174291	1.33691e-05	0.202529	0.00011548	1.00035
115	0.450407	0.373316	2.48064	667856768	5219371	0.332143	0.0077545	0.118207	0	0.145965	3.13162e-07	0.174299	7.88125e-06	0.202607	7.82906e-05	0.99973
116	0.448906	0.367902	2.41485	662671678	5185090	0.337328	0.00776378	0.118207	0	0.145965	1.55553e-07	0.174304	4.51103e-06	0.202659	5.19028e-05	1.00092
117	0.447424	0.362603	2.35153	657528931	5142747	0.342471	0.00776063	0.118207	0	0.145965	5.14275e-08	0.174306	2.46852e-06	0.202692	3.35307e-05	1.00052
118	0.445958	0.357411	2.29157	652425110	5103821	0.347575	0.00776212	0.118207	0	0.145965	5.10382e-08	0.174307	1.32699e-06	0.202713	2.10788e-05	1.00071
119	0.444512	0.352329	2.2318	647364390	5060720	0.352636	0.00775678	0.118207	0	0.145965	0	0.174308	6.57894e-07	0.202726	1.28542e-05	1.00002
120	0.443078	0.347342	2.17846	642337403	5026987	0.357663	0.00776531	0.118207	0	0.145965	0	0.174308	3.01619e-07	0.202734	7.59075e-06	1.00112
