# Supplementary material for: Quantifying the Potential for Future Gene Therapy to Lower Lifetime Risk of Polygenic Late-Onset Diseases
Source: MDPI journal article supplement (doi:10.3390/ijms20133352), 2019-07-08
Supplement: s2 [file s2 › SuppFiles/Results/LODsCommonLow/ProstateCancer/1.000/IndividualsByBetaDistrib.csv]

nEntry	Beta	nDetrimentalCount	nFractionPopulation	nCumulativeFractionPopulation	nEditsNeeded	nIndividuals
0	-19.8	0	0	1	0	0
1	-19.6	0	0	1	0	0
2	-19.4	0	0	1	0	0
3	-19.2	0	0	1	0	0
4	-19	0	0	1	0	0
5	-18.8	0	0	1	0	0
6	-18.6	0	0	1	0	0
7	-18.4	0	0	1	0	0
8	-18.2	0	0	1	0	0
9	-18	0	0	1	0	0
10	-17.8	0	0	1	0	0
11	-17.6	0	0	1	0	0
12	-17.4	0	0	1	0	0
13	-17.2	0	0	1	0	0
14	-17	0	0	1	0	0
15	-16.8	0	0	1	0	0
16	-16.6	0	0	1	0	0
17	-16.4	0	0	1	0	0
18	-16.2	0	0	1	0	0
19	-16	0	0	1	0	0
20	-15.8	0	0	1	0	0
21	-15.6	0	0	1	0	0
22	-15.4	0	0	1	0	0
23	-15.2	0	0	1	0	0
24	-15	0	0	1	0	0
25	-14.8	0	0	1	0	0
26	-14.6	0	0	1	0	0
27	-14.4	0	0	1	0	0
28	-14.2	0	0	1	0	0
29	-14	0	0	1	0	0
30	-13.8	581	1e-09	1	0	1
31	-13.6	0	0	1	0	0
32	-13.4	0	0	1	0	0
33	-13.2	0	0	1	0	0
34	-13	0	0	1	0	0
35	-12.8	0	0	1	0	0
36	-12.6	0	0	1	0	0
37	-12.4	0	0	1	0	0
38	-12.2	0	0	1	0	0
39	-12	599	4e-09	1	0	4
40	-11.8	607.5	4e-09	1	0	4
41	-11.6	608.92	1.2e-08	0.99999999	0	12
42	-11.4	606.9	2.1e-08	0.99999998	0	21
43	-11.2	612	3.5e-08	0.99999996	0	35
44	-11	611.92	6.4e-08	0.99999992	0	64
45	-10.8	614.59	1.09e-07	0.99999986	0	109
46	-10.6	616.51	1.55e-07	0.99999975	0	155
47	-10.4	618.71	2.58e-07	0.9999996	0	258
48	-10.2	620.31	3.54e-07	0.99999934	0	354
49	-10	621.76	5.78e-07	0.99999898	0	578
50	-9.8	624.06	9.14e-07	0.99999841	0	914
51	-9.6	625.97	1.504e-06	0.99999749	0	1504
52	-9.4	627.58	2.26e-06	0.99999599	0	2260
53	-9.2	629.87	3.461e-06	0.99999373	0	3461
54	-9	631.59	5.226e-06	0.99999027	0	5226
55	-8.8	633.41	7.692e-06	0.99998504	0	7692
56	-8.6	635.5	1.1504e-05	0.99997735	0	11504
57	-8.4	637.37	1.6842e-05	0.99996584	0	16842
58	-8.2	639.24	2.4192e-05	0.999949	0	24192
59	-8	641.14	3.5211e-05	0.99992481	0	35211
60	-7.8	643.04	4.9947e-05	0.9998896	0	49947
61	-7.6	644.94	7.031e-05	0.99983965	0	70310
62	-7.4	646.81	9.7624e-05	0.99976934	0	97624
63	-7.2	648.75	0.000135602	0.99967172	0	135602
64	-7	650.62	0.000185845	0.99953612	0	185845
65	-6.8	652.54	0.000254042	0.99935027	0	254042
66	-6.6	654.43	0.000341541	0.99909623	0	341541
67	-6.4	656.33	0.000455367	0.99875469	0	455367
68	-6.2	658.24	0.000601265	0.99829932	0	601265
69	-6	660.15	0.000786783	0.99769806	0	786783
70	-5.8	662.04	0.001020031	0.99691127	0	1020031
71	-5.6	663.93	0.001312231	0.99589124	0	1312231
72	-5.4	665.83	0.001672001	0.99457901	0	1672001
73	-5.2	667.72	0.002106676	0.99290701	0	2106676
74	-5	669.62	0.002634992	0.99080033	0	2634992
75	-4.8	671.52	0.003266813	0.98816534	0	3266813
76	-4.6	673.42	0.00400555	0.98489853	0	4005550
77	-4.4	675.31	0.004876937	0.98089298	0	4876937
78	-4.2	677.21	0.005876128	0.97601604	0	5876128
79	-4	679.1	0.007019254	0.97013991	0	7019254
80	-3.8	680.99	0.008316456	0.96312066	0	8316456
81	-3.6	682.89	0.0097601	0.9548042	0	9760100
82	-3.4	684.79	0.011340778	0.9450441	0	11340778
83	-3.2	686.68	0.013064578	0.93370333	0	13064578
84	-3	688.58	0.014916684	0.92063875	0	14916684
85	-2.8	690.47	0.016881169	0.90572206	0	16881169
86	-2.6	692.36	0.018921566	0.88884089	0	18921566
87	-2.4	694.25	0.021032986	0.86991933	0	21032986
88	-2.2	696.15	0.023168401	0.84888634	0	23168401
89	-2	698.04	0.025302283	0.82571794	0	25302283
90	-1.8	699.94	0.027375001	0.80041566	0	27375001
91	-1.6	701.83	0.029356406	0.77304066	0	29356406
92	-1.4	703.72	0.031197544	0.74368425	0	31197544
93	-1.2	705.61	0.032872935	0.71248671	0	32872935
94	-1	707.51	0.034328807	0.67961377	0	34328807
95	-0.8	709.4	0.035527497	0.64528497	0	35527497
96	-0.6	711.28	0.036452675	0.60975747	0	36452675
97	-0.4	713.18	0.03707493	0.57330479	0	37074930
98	-0.2	715.07	0.037364299	0.53622986	0	37364299
99	0	716.96	0.037332982	0.49886557	0	37332982
100	0.2	718.85	0.03696823	0.46153258	1.8916	36968230
101	0.4	720.74	0.036308182	0.42456435	3.7795	36308182
102	0.6	722.63	0.035334539	0.38825617	5.669	35334539
103	0.8	724.52	0.03408865	0.35292163	7.559	34088650
104	1	726.41	0.032613192	0.31883298	9.4508	32613192
105	1.2	728.3	0.030913734	0.28621979	11.34	30913734
106	1.4	730.18	0.0290615	0.25530606	13.226	29061500
107	1.6	732.07	0.027077467	0.22624456	15.115	27077467
108	1.8	733.96	0.025016236	0.19916709	17.005	25016236
109	2	735.85	0.022911801	0.17415085	18.891	22911801
110	2.2	737.74	0.020799238	0.15123905	20.784	20799238
111	2.4	739.63	0.018726105	0.13043981	22.67	18726105
112	2.6	741.51	0.016719933	0.11171371	24.556	16719933
113	2.8	743.4	0.014787752	0.094993776	26.443	14787752
114	3	745.29	0.012972787	0.080206024	28.33	12972787
115	3.2	747.18	0.011278368	0.067233237	30.217	11278368
116	3.4	749.06	0.009725775	0.055954869	32.105	9725775
117	3.6	750.95	0.008318134	0.046229094	33.992	8318134
118	3.8	752.84	0.007053851	0.03791096	35.884	7053851
119	4	754.72	0.005924563	0.030857109	37.765	5924563
120	4.2	756.61	0.004934651	0.024932546	39.652	4934651
121	4.4	758.5	0.004078231	0.019997895	41.542	4078231
122	4.6	760.38	0.003342754	0.015919664	43.425	3342754
123	4.8	762.27	0.002717477	0.01257691	45.309	2717477
124	5	764.16	0.002188666	0.009859433	47.197	2188666
125	5.2	766.03	0.001749455	0.007670767	49.076	1749455
126	5.4	767.92	0.001383293	0.005921312	50.962	1383293
127	5.6	769.81	0.001087381	0.004538019	52.856	1087381
128	5.8	771.69	0.000847591	0.003450638	54.736	847591
129	6	773.57	0.00065456	0.002603047	56.615	654560
130	6.2	775.47	0.000501167	0.001948487	58.509	501167
131	6.4	777.35	0.000380503	0.00144732	60.388	380503
132	6.6	779.22	0.000286135	0.001066817	62.261	286135
133	6.8	781.14	0.000214075	0.000780682	64.181	214075
134	7	783.02	0.000159395	0.000566607	66.061	159395
135	7.2	784.87	0.000116862	0.000407212	67.909	116862
136	7.4	786.75	8.4937e-05	0.00029035	69.792	84937
137	7.6	788.65	6.1143e-05	0.000205413	71.687	61143
138	7.8	790.55	4.3372e-05	0.00014427	73.589	43372
139	8	792.39	3.0987e-05	0.000100898	75.433	30987
140	8.2	794.25	2.1905e-05	6.9911e-05	77.288	21905
141	8.4	796.19	1.5305e-05	4.8006e-05	79.227	15305
142	8.6	798.03	1.072e-05	3.2701e-05	81.074	10720
143	8.8	799.86	7.17e-06	2.1981e-05	82.9	7170
144	9	801.79	4.83e-06	1.4811e-05	84.829	4830
145	9.2	803.59	3.381e-06	9.981e-06	86.635	3381
146	9.4	805.75	2.201e-06	6.6e-06	88.793	2201
147	9.6	807.44	1.528e-06	4.399e-06	90.481	1528
148	9.8	809.48	1.046e-06	2.871e-06	92.518	1046
149	10	811.48	6.44e-07	1.825e-06	94.523	644
150	10.2	813.03	4.15e-07	1.181e-06	96.068	415
151	10.4	814.88	2.84e-07	7.66e-07	97.922	284
152	10.6	816.87	1.83e-07	4.82e-07	99.91	183
153	10.8	818.35	1.1e-07	2.99e-07	101.4	110
154	11	821	5.9e-08	1.89e-07	104.04	59
155	11.2	824.53	5.1e-08	1.3e-07	107.57	51
156	11.4	825.91	3.2e-08	7.9e-08	108.95	32
157	11.6	828.35	1.7e-08	4.7e-08	111.39	17
158	11.8	829.64	1.1e-08	3e-08	112.68	11
159	12	833.17	6e-09	1.9e-08	116.21	6
160	12.2	834.67	3e-09	1.3e-08	117.71	3
161	12.4	837.5	2e-09	1e-08	120.54	2
162	12.6	839.33	3e-09	8e-09	122.37	3
163	12.8	837.33	3e-09	5e-09	120.37	3
164	13	0	0	2e-09	0	0
165	13.2	0	0	2e-09	0	0
166	13.4	844	2e-09	2e-09	127.04	2
167	13.6	0	0	0	0	0
168	13.8	0	0	0	0	0
169	14	0	0	0	0	0
170	14.2	0	0	0	0	0
171	14.4	0	0	0	0	0
172	14.6	0	0	0	0	0
173	14.8	0	0	0	0	0
174	15	0	0	0	0	0
175	15.2	0	0	0	0	0
176	15.4	0	0	0	0	0
177	15.6	0	0	0	0	0
178	15.8	0	0	0	0	0
179	16	0	0	0	0	0
180	16.2	0	0	0	0	0
181	16.4	0	0	0	0	0
182	16.6	0	0	0	0	0
183	16.8	0	0	0	0	0
184	17	0	0	0	0	0
185	17.2	0	0	0	0	0
186	17.4	0	0	0	0	0
187	17.6	0	0	0	0	0
188	17.8	0	0	0	0	0
189	18	0	0	0	0	0
190	18.2	0	0	0	0	0
191	18.4	0	0	0	0	0
192	18.6	0	0	0	0	0
193	18.8	0	0	0	0	0
194	19	0	0	0	0	0
195	19.2	0	0	0	0	0
196	19.4	0	0	0	0	0
197	19.6	0	0	0	0	0
198	19.8	0	0	0	0	0
199	20	0	0	0	0	0
