# Supplementary material for: Quantifying the Potential for Future Gene Therapy to Lower Lifetime Risk of Polygenic Late-Onset Diseases
Source: MDPI journal article supplement (doi:10.3390/ijms20133352), 2019-07-08
Supplement: s2 [file s2 › SuppFiles/Results/LODsCommonLow/ProstateCancer/1.000/ScatterData.csv]

Age	OR	Beta
48	150.79	5.0159
49	12.633	2.5363
50	2.5312	0.92871
50	35.294	3.5637
50	723.74	6.5844
50	36.68	3.6022
50	7.9853	2.0776
51	199.94	5.298
51	791.36	6.6737
51	17.151	2.842
51	396.13	5.9817
51	58.657	4.0717
51	104.87	4.6527
51	11.163	2.4126
52	20.728	3.0315
52	100.42	4.6094
52	0.5077	-0.67787
52	89.956	4.4993
53	139.83	4.9404
53	5.2975	1.6672
54	146.94	4.9901
54	19.294	2.9598
54	37.504	3.6244
54	372.61	5.9205
54	8.8549	2.181
54	8.5786	2.1493
54	18.027	2.8919
54	326.83	5.7894
55	79.991	4.3819
55	310.3	5.7375
55	1.0494	0.048256
55	39.209	3.6689
55	98.815	4.5933
55	1175.8	7.0697
56	16.826	2.8229
56	562.44	6.3323
56	99.221	4.5974
56	790.45	6.6726
56	523.9	6.2613
56	21.92	3.0874
57	1345.2	7.2043
57	794.37	6.6775
57	420.76	6.0421
57	12.967	2.5624
57	355.38	5.8732
57	4.1331	1.419
57	40.809	3.7089
57	94.737	4.5511
57	18.175	2.9001
57	0.63026	-0.46163
58	57.256	4.0475
58	30.663	3.4231
58	88.485	4.4828
58	0.63339	-0.45667
58	12.886	2.5561
58	20.166	3.004
58	8.6773	2.1607
58	232.68	5.4496
58	13.746	2.6207
58	19.778	2.9846
58	21.671	3.076
58	111.64	4.7153
59	36.93	3.609
59	647.29	6.4728
59	104.91	4.6531
59	20.657	3.028
59	182.8	5.2084
59	333.45	5.8095
59	75.813	4.3283
59	107.3	4.6756
59	5.8027	1.7583
59	22.641	3.1198
59	29.183	3.3736
59	5.5674	1.7169
59	20.17	3.0042
59	45.147	3.8099
59	61.594	4.1206
60	5.236	1.6556
60	51.847	3.9483
60	46.627	3.8422
60	13.081	2.5711
60	0.89115	-0.11524
60	694.1	6.5426
60	146.57	4.9875
60	12.652	2.5378
60	6.4866	1.8697
60	12.055	2.4895
60	53.546	3.9805
60	84.525	4.4371
60	14.917	2.7025
60	59.227	4.0814
60	2.9059	1.0667
60	153.45	5.0334
60	46.284	3.8348
60	479.21	6.1721
60	83.302	4.4225
60	238.52	5.4744
60	48.274	3.8769
60	351.45	5.8621
60	111.22	4.7115
60	234.41	5.4571
61	172.23	5.1488
61	9.2321	2.2227
61	161.96	5.0873
61	77.729	4.3532
61	2.387	0.87006
61	283.87	5.6485
61	32.531	3.4822
61	198.95	5.293
61	25.087	3.2224
61	0.80052	-0.2225
61	90.411	4.5044
61	11.825	2.4703
61	110.74	4.7072
61	10.995	2.3975
61	6.1733	1.8202
61	45.225	3.8117
61	95.031	4.5542
61	3.093	1.1291
61	5.7399	1.7474
61	7.8356	2.0587
61	34.268	3.5342
61	16.578	2.8081
61	134.69	4.903
61	3.4287	1.2322
61	20.284	3.0098
61	215.4	5.3725
61	9.1178	2.2102
61	297.44	5.6952
61	397.85	5.9861
61	151.84	5.0229
61	6.2533	1.8331
61	133.73	4.8958
62	72.938	4.2896
62	3.595	1.2795
62	6.9203	1.9345
62	61.051	4.1117
62	1.6836	0.52094
62	14.877	2.6998
62	83.083	4.4198
62	24.845	3.2127
62	30.693	3.424
62	24.388	3.1941
62	18.79	2.9334
62	1.8109	0.5938
62	172.54	5.1506
62	111.48	4.7139
62	131.95	4.8824
62	2.333	0.84716
62	5.8867	1.7727
62	1618.2	7.389
62	17.342	2.8532
62	519.16	6.2522
62	20.8	3.0349
62	19.032	2.9461
62	12.034	2.4878
62	62.38	4.1333
62	2.4772	0.90712
62	1.0076	0.0075799
62	54.065	3.9902
63	43.294	3.768
63	2.0296	0.70785
63	152.95	5.0301
63	30.804	3.4277
63	39.566	3.678
63	12.328	2.5118
63	120.18	4.789
63	6.6314	1.8918
63	138.4	4.9301
63	380.42	5.9413
63	15.779	2.7587
63	3.3562	1.2108
63	61.955	4.1264
63	3.3494	1.2088
63	0.63432	-0.45521
63	43.215	3.7662
63	16.835	2.8235
63	7.6	2.0281
63	22.979	3.1346
63	514.37	6.2429
63	60.456	4.1019
63	23.544	3.1589
63	4.2681	1.4512
63	15.112	2.7155
64	57.909	4.0589
64	41.854	3.7342
64	12.226	2.5035
64	0.27285	-1.2988
64	162.21	5.0889
64	67.438	4.2112
64	0.53655	-0.62259
64	364.42	5.8983
64	6.9139	1.9335
64	14.508	2.6747
64	244.34	5.4986
64	211.15	5.3526
64	100.89	4.6141
64	24.635	3.2042
64	38.418	3.6485
64	2.7267	1.0031
64	30.85	3.4292
64	450.58	6.1105
64	30.012	3.4016
64	11.826	2.4703
64	27.243	3.3048
64	14.94	2.704
64	1.6207	0.48286
64	92.235	4.5243
64	1.2498	0.22297
64	18.068	2.8941
64	92.753	4.5299
64	46.753	3.8449
64	22.55	3.1157
64	30.68	3.4236
64	56.816	4.0398
64	69.85	4.2464
64	66.325	4.1946
64	61.426	4.1178
65	2.9735	1.0897
65	120.7	4.7933
65	12.844	2.5528
65	388.68	5.9627
65	116.02	4.7538
65	52.401	3.9589
65	8.3275	2.1196
65	56.537	4.0349
65	25.493	3.2384
65	9.0469	2.2024
65	44.609	3.7979
65	124.42	4.8237
65	41.894	3.7351
65	0.53643	-0.62283
65	17.471	2.8606
65	11.021	2.3998
65	9.9569	2.2983
65	10.344	2.3364
65	42.242	3.7434
65	12.483	2.5244
65	4.6106	1.5283
65	103.71	4.6416
65	18.413	2.9131
65	88.547	4.4835
65	15.123	2.7162
65	834.54	6.7269
65	24.901	3.2149
65	44.34	3.7919
65	8.9854	2.1956
65	35.325	3.5646
65	60.778	4.1072
65	5.0246	1.6143
65	6.5445	1.8786
65	16.429	2.7991
65	13.329	2.5899
65	5.0134	1.6121
65	13.934	2.6343
65	121.23	4.7977
66	65.731	4.1856
66	2.0365	0.71124
66	19.186	2.9542
66	20.009	2.9962
66	26.094	3.2617
66	27.947	3.3303
66	62.295	4.1319
66	148.16	4.9983
66	12.247	2.5052
66	11.274	2.4225
66	150.24	5.0123
66	116.29	4.756
66	19.08	2.9487
66	2.3706	0.86315
66	4.7521	1.5586
66	396	5.9814
66	78.166	4.3588
66	43.592	3.7749
66	7.0693	1.9558
66	16.582	2.8083
66	13.23	2.5825
66	77.357	4.3484
66	39.866	3.6855
66	120.42	4.791
66	10.555	2.3566
66	80.807	4.3921
66	9.0728	2.2053
66	10.483	2.3497
66	25.745	3.2482
66	2.7167	0.99943
66	3.1223	1.1386
66	4.0198	1.3912
66	30.664	3.4231
66	17.008	2.8337
66	37.479	3.6238
66	48.07	3.8727
66	35.505	3.5697
66	21.648	3.0749
67	7.7481	2.0474
67	5.969	1.7866
67	14.607	2.6815
67	9.1381	2.2124
67	189.35	5.2436
67	88.862	4.4871
67	20.205	3.0059
67	35.022	3.556
67	58.371	4.0668
67	59.369	4.0838
67	19.46	2.9684
67	24.899	3.2148
67	14.84	2.6974
67	59.007	4.0777
67	43.204	3.7659
67	34.137	3.5304
67	115.04	4.7453
67	53.444	3.9786
67	4.5644	1.5183
67	25.454	3.2369
67	262.34	5.5697
67	186.13	5.2265
67	4.8216	1.5731
67	428.31	6.0598
67	2.6991	0.99293
67	370.72	5.9154
67	45.328	3.8139
67	200.49	5.3008
67	5.1378	1.6366
67	14.976	2.7065
67	2.0231	0.70461
67	12.003	2.4851
67	17.514	2.863
67	3.6698	1.3001
67	0.84943	-0.16319
67	6.1517	1.8167
67	4.496	1.5032
67	119.75	4.7854
67	80.129	4.3836
67	251.49	5.5274
67	9.3042	2.2305
67	2.1163	0.74965
67	54.368	3.9958
67	1.7579	0.56413
67	35.43	3.5676
67	402.34	5.9973
67	79.199	4.372
67	71.754	4.2732
68	13.537	2.6054
68	11.398	2.4335
68	21.794	3.0816
68	3.7872	1.3316
68	19.666	2.9789
68	103.74	4.6419
68	29.602	3.3878
68	6.0122	1.7938
68	4.3796	1.477
68	7.7464	2.0472
68	12.344	2.5132
68	40.439	3.6998
68	219.76	5.3926
68	542.18	6.2956
68	37.305	3.6191
68	61.548	4.1198
68	5.8404	1.7648
68	23.341	3.1502
68	81.73	4.4034
68	36.183	3.5886
68	31.755	3.458
68	156.96	5.056
68	32.841	3.4917
68	46.634	3.8423
68	2.2613	0.81593
68	151.72	5.022
68	24.979	3.218
68	21.563	3.071
68	1.9126	0.64845
68	23.157	3.1423
68	4.5011	1.5043
68	4.2845	1.455
68	50.189	3.9158
69	93.635	4.5394
69	33.66	3.5163
69	18.494	2.9175
69	9.9232	2.2949
69	30.472	3.4168
69	1564.8	7.3555
69	23.096	3.1397
69	39.907	3.6865
69	1.7377	0.55257
69	16.527	2.805
69	137.62	4.9245
69	12.159	2.4981
69	1.7256	0.54558
69	3.6098	1.2837
69	92.333	4.5254
69	35.59	3.5721
69	156.69	5.0543
69	13.582	2.6087
69	32.272	3.4742
69	3.9163	1.3651
69	23.191	3.1438
69	32.658	3.4861
69	17.394	2.8561
69	121.25	4.7978
69	0.43123	-0.84112
69	1.4307	0.35815
69	21.006	3.0448
69	3.2154	1.1679
69	74.418	4.3097
69	25.769	3.2492
69	3.1521	1.1481
69	9.3772	2.2383
69	3.2088	1.1659
69	2.2797	0.82404
69	97.456	4.5794
69	0.091501	-2.3914
69	135.98	4.9125
69	44.452	3.7944
69	26.483	3.2765
69	91.047	4.5114
69	14.564	2.6786
69	80.149	4.3839
69	57.076	4.0444
70	272.35	5.6071
70	58.248	4.0647
70	12.13	2.4957
70	6.5354	1.8772
70	49.289	3.8977
70	9.2506	2.2247
70	1.3914	0.3303
70	10.694	2.3697
70	1.7665	0.56899
70	89.943	4.4992
70	1.6682	0.51175
70	6.2101	1.8262
70	15.451	2.7377
70	23.097	3.1397
70	9.947	2.2973
70	11.711	2.4605
70	0.43358	-0.83568
70	44.565	3.797
70	9.4088	2.2416
70	3.6189	1.2862
70	29.122	3.3715
70	76.244	4.3339
70	63.027	4.1436
70	242.15	5.4895
70	0.42841	-0.84767
70	34.621	3.5445
70	42.007	3.7378
70	0.41006	-0.89146
70	60.899	4.1092
70	27.61	3.3182
70	5.8109	1.7597
70	31.273	3.4427
70	7.1194	1.9628
70	13.131	2.5749
70	19.474	2.9691
70	39.167	3.6678
70	22.508	3.1139
70	19.994	2.9954
70	208.31	5.339
70	2.6252	0.96516
70	1.5547	0.44126
70	250.56	5.5237
70	18.634	2.925
70	1.1743	0.16067
70	72.665	4.2859
70	118.95	4.7787
70	70.387	4.254
70	56.382	4.0321
70	2.8645	1.0524
71	8.7343	2.1673
71	5.5685	1.7171
71	76.109	4.3322
71	3.6385	1.2916
71	1.2089	0.18975
71	3.209	1.1659
71	10.665	2.367
71	41.48	3.7252
71	5.604	1.7235
71	40.783	3.7083
71	6.0406	1.7985
71	5.0608	1.6215
71	18.117	2.8968
71	32.441	3.4794
71	7.0701	1.9559
71	202.16	5.3091
71	42.497	3.7494
71	17.665	2.8716
71	41.61	3.7283
71	46.817	3.8462
71	99.584	4.601
71	48.75	3.8867
71	1.673	0.51462
71	33.102	3.4996
71	1.1497	0.13947
71	31.182	3.4399
71	14.544	2.6772
71	1.5096	0.41183
71	2.2282	0.80119
71	19.236	2.9568
71	132.63	4.8876
71	82.399	4.4116
71	7.4363	2.0064
71	10.879	2.3868
71	0.48105	-0.73178
71	67.831	4.217
71	96.693	4.5715
71	11.872	2.4742
71	24.409	3.195
71	25.821	3.2512
71	1.8264	0.60237
71	13.849	2.6282
71	29.28	3.3769
71	15.661	2.7511
71	11.815	2.4694
71	81.631	4.4022
71	2.5766	0.94648
71	55.115	4.0094
71	26.283	3.2689
71	96.377	4.5683
71	1.7116	0.53743
72	326.34	5.788
72	32.396	3.478
72	7.1206	1.963
72	48.623	3.8841
72	2.4096	0.87947
72	28.195	3.3392
72	2.7937	1.0274
72	6.0826	1.8054
72	74.548	4.3114
72	14.274	2.6585
72	12.886	2.5561
72	5.6941	1.7394
72	1.3237	0.28043
72	210.26	5.3484
72	11.78	2.4664
72	72.831	4.2881
72	0.71188	-0.33985
72	3.8158	1.3391
72	125.44	4.8318
72	25.342	3.2325
72	68.047	4.2202
72	3.07	1.1217
72	15.833	2.7621
72	7.8626	2.0621
72	11.091	2.4062
72	95.695	4.5612
72	30.575	3.4202
72	0.18217	-1.7028
72	62.954	4.1424
72	115.82	4.752
72	13.125	2.5745
72	27.177	3.3024
72	7.1393	1.9656
72	131.82	4.8814
72	6.9386	1.9371
72	2.1012	0.74252
72	3.0861	1.1269
72	2.7719	1.0195
72	34.754	3.5483
72	109.79	4.6986
72	27.463	3.3128
72	12.76	2.5463
72	20.631	3.0268
72	27.878	3.3279
72	27.533	3.3154
72	20.722	3.0312
72	4.6068	1.5275
72	5.2304	1.6545
73	25.332	3.2321
73	13.339	2.5907
73	2.1221	0.75242
73	47.901	3.8691
73	17.303	2.8509
73	3.8267	1.342
73	70.054	4.2493
73	18.489	2.9172
73	5.8708	1.77
73	9.3403	2.2343
73	35.696	3.575
73	1.0836	0.08028
73	28.933	3.365
73	35.682	3.5747
73	0.62786	-0.46543
73	14.567	2.6787
73	557.9	6.3242
73	10.246	2.3269
73	15.01	2.7087
73	8.1855	2.1024
73	24.919	3.2156
73	16.662	2.8131
73	8.6917	2.1624
73	83.722	4.4275
73	34.355	3.5368
73	6.6739	1.8982
73	13.834	2.6271
73	17.89	2.8843
73	0.40167	-0.91213
73	28.988	3.3669
73	15.941	2.7689
73	23.763	3.1681
73	74.854	4.3155
73	19.759	2.9836
73	13.017	2.5663
73	7.3006	1.988
73	24.35	3.1925
73	17.207	2.8453
73	1.8627	0.62205
74	0.36104	-1.0188
74	19.539	2.9724
74	12.968	2.5625
74	44.985	3.8063
74	13.094	2.5721
74	8.5121	2.1415
74	175.6	5.1682
74	49.772	3.9075
74	0.045347	-3.0934
74	3.3914	1.2212
74	2.2728	0.82103
74	20.46	3.0185
74	3.2928	1.1917
74	8.2733	2.113
74	8.4854	2.1383
74	37.069	3.6128
74	4.9054	1.5903
74	30.955	3.4325
74	114.25	4.7384
74	10.683	2.3686
74	15.849	2.7631
74	4.915	1.5923
74	549.23	6.3085
74	20.38	3.0146
74	0.42688	-0.85126
74	12.038	2.4881
74	13.015	2.5661
74	35.71	3.5754
74	7.6017	2.0284
74	10.295	2.3317
74	52.593	3.9626
74	17.865	2.8828
74	15.883	2.7652
74	19.504	2.9706
74	48.115	3.8736
74	54.053	3.99
74	41.279	3.7204
74	288.2	5.6636
74	11.584	2.4496
74	18.377	2.9111
74	1.3917	0.33054
74	17.949	2.8875
74	3.5706	1.2727
74	2.8283	1.0397
74	65.017	4.1746
74	2.1697	0.7746
74	4.6138	1.5291
74	7.8516	2.0607
74	21.285	3.058
75	45.656	3.8211
75	3.5831	1.2762
75	38.756	3.6573
75	11.87	2.474
75	0.38805	-0.94662
75	7.5191	2.0174
75	47.518	3.8611
75	48.56	3.8828
75	42.595	3.7517
75	18.803	2.934
75	10.469	2.3484
75	17.616	2.8688
75	45.897	3.8264
75	8.0717	2.0884
75	85.548	4.4491
75	15.116	2.7158
75	13.569	2.6078
75	7.8184	2.0565
75	22.026	3.0922
75	2.1151	0.7491
75	47.33	3.8571
75	47.694	3.8648
75	0.82215	-0.19583
75	28.717	3.3575
75	61.967	4.1266
75	16.325	2.7927
75	8.3175	2.1184
75	8.8959	2.1856
75	3.6358	1.2908
75	6.0081	1.7931
75	3.0079	1.1012
75	3.3849	1.2193
75	3.4345	1.2339
75	11.235	2.419
75	22.037	3.0927
75	18.951	2.9419
75	11.56	2.4475
75	2.305	0.83507
75	2.9107	1.0684
75	1.1282	0.12066
75	20.655	3.028
75	109.12	4.6924
75	121.04	4.7961
75	66.281	4.1939
75	33.443	3.5098
75	69.958	4.2479
75	50.335	3.9187
75	39.571	3.6781
75	69.296	4.2384
75	0.74426	-0.29536
76	5.364	1.6797
76	5.4331	1.6925
76	82.566	4.4136
76	10.942	2.3926
76	13.152	2.5765
76	41.95	3.7365
76	1.3878	0.32769
76	10.969	2.395
76	19.045	2.9468
76	31	3.434
76	16.231	2.7869
76	27.698	3.3214
76	11.838	2.4713
76	40.64	3.7048
76	11.454	2.4384
76	71.532	4.2701
76	51.084	3.9335
76	10.358	2.3378
76	4.8295	1.5747
76	11.559	2.4475
76	58.768	4.0736
76	45.881	3.826
76	17.793	2.8788
76	30.897	3.4307
76	2.7482	1.011
76	32.883	3.493
76	9.1472	2.2134
76	4.8758	1.5843
76	41.748	3.7317
76	4.8591	1.5809
76	29.887	3.3974
76	232.73	5.4499
76	37.482	3.6239
76	12.16	2.4982
76	13.353	2.5918
76	2.4411	0.89245
76	40.17	3.6931
76	5.8267	1.7624
76	4.631	1.5328
76	65.966	4.1891
76	48.037	3.872
76	8.1776	2.1014
76	50.769	3.9273
76	50.173	3.9155
76	112.89	4.7264
76	31.31	3.4439
76	5.509	1.7064
76	1.1714	0.15818
77	0.82651	-0.19054
77	39.146	3.6673
77	14.571	2.679
77	3.0422	1.1126
77	14.119	2.6475
77	27.13	3.3006
77	19.036	2.9463
77	4.2753	1.4529
77	49.502	3.902
77	11.055	2.4029
77	4.1184	1.4155
77	18.42	2.9135
77	284.66	5.6513
77	25.738	3.248
77	27.922	3.3294
77	22.147	3.0977
77	0.53657	-0.62255
77	56.534	4.0348
77	1.9576	0.67174
77	19.883	2.9899
77	32.054	3.4674
77	0.14511	-1.9302
77	4.0768	1.4053
77	40.095	3.6912
77	84.741	4.4396
77	0.82291	-0.19491
77	19.583	2.9747
77	2.2645	0.81737
77	9.9678	2.2994
77	39.148	3.6674
77	12.961	2.5619
77	14.084	2.645
77	52.594	3.9626
77	101.98	4.6248
77	7.5556	2.0223
77	47.804	3.8671
77	7.4987	2.0147
77	2.8321	1.041
77	70.742	4.259
77	4.172	1.4284
77	38.803	3.6585
77	93.818	4.5414
77	5.8112	1.7598
77	5.0407	1.6175
77	1.5912	0.46449
77	0.51443	-0.6647
77	43.855	3.7809
78	7.302	1.9881
78	2.7804	1.0226
78	13.38	2.5938
78	10.508	2.3521
78	5.5012	1.705
78	6.2744	1.8365
78	31.759	3.4582
78	4.3676	1.4742
78	34.427	3.5389
78	4.213	1.4382
78	15.482	2.7397
78	43.88	3.7815
78	12.654	2.538
78	8.9746	2.1944
78	0.37001	-0.99422
78	33.394	3.5084
78	22.599	3.1179
78	2.1288	0.75556
78	4.7018	1.5479
78	17.211	2.8456
78	117.84	4.7693
78	6.044	1.7991
78	55.51	4.0166
78	1.4207	0.35117
78	9.903	2.2928
78	23.948	3.1759
78	18.946	2.9416
78	30.038	3.4025
78	0.44142	-0.81776
78	17.853	2.8822
78	12.358	2.5143
78	58.4	4.0673
78	67.526	4.2125
78	2.135	0.75848
78	12.197	2.5012
78	6.4433	1.863
79	3.8169	1.3394
79	9.705	2.2726
79	26.64	3.2824
79	4.2432	1.4453
79	246.24	5.5063
79	8.7024	2.1636
79	7.0597	1.9544
79	1.8183	0.59793
79	0.41449	-0.8807
79	46.405	3.8374
79	9.2055	2.2198
79	3.6105	1.2838
79	3.7099	1.311
79	11.759	2.4646
79	3.8239	1.3413
79	44.282	3.7906
79	26.768	3.2872
79	25.275	3.2298
79	87.214	4.4684
79	37.18	3.6158
79	3.8686	1.3529
79	13.982	2.6378
79	1.2036	0.18531
79	12.366	2.515
79	14.101	2.6462
79	10.609	2.3617
79	47.978	3.8707
79	14.169	2.6511
79	48.729	3.8863
79	5.7773	1.7539
79	3.8188	1.3399
79	41.09	3.7158
79	3.5214	1.2588
80	3.8254	1.3417
80	4.4809	1.4998
80	29.463	3.3831
80	5.982	1.7888
80	31.231	3.4414
80	32.404	3.4783
80	1.2325	0.20904
80	0.83579	-0.17938
80	5.0243	1.6143
80	0.97678	-0.023496
80	0.88533	-0.1218
80	49.541	3.9028
80	11.66	2.4561
80	23.802	3.1698
80	11.506	2.4429
80	13.832	2.627
80	8.5246	2.143
80	4.0784	1.4057
80	15.984	2.7716
80	5.2062	1.6499
80	22.004	3.0912
80	13.095	2.5723
80	9.5521	2.2568
80	10.315	2.3336
80	20.908	3.0401
80	9.3933	2.24
80	3.1409	1.1445
80	17.249	2.8478
80	1.32	0.27767
80	3.5383	1.2636
81	42.36	3.7462
81	14.657	2.6849
81	0.96196	-0.038786
81	8.0325	2.0835
81	1.1808	0.16618
81	1.2218	0.20035
81	3.4072	1.2259
81	9.3976	2.2405
81	1.3442	0.29584
81	77.142	4.3456
81	10.765	2.3763
81	4.4948	1.5029
81	5.9525	1.7838
81	4.1061	1.4125
81	35.399	3.5667
81	38.066	3.6393
81	2.9469	1.0808
81	6.1947	1.8237
81	0.44492	-0.80986
81	5.7441	1.7482
81	18.912	2.9398
81	0.32764	-1.1158
81	1.7413	0.55462
81	25.727	3.2475
81	1.9924	0.68933
81	59.341	4.0833
81	6.8373	1.9224
81	20.762	3.0331
81	2.6388	0.97033
81	11.166	2.4129
81	1.9466	0.6661
81	6.7962	1.9164
81	4.5608	1.5175
81	24.057	3.1804
81	23.183	3.1434
81	5.3946	1.6854
81	20.898	3.0397
81	6.1003	1.8083
81	7.6731	2.0377
81	19.208	2.9553
81	20.556	3.0231
82	6.3464	1.8479
82	10.633	2.3639
82	2.9726	1.0894
82	20.417	3.0164
82	4.1815	1.4307
82	14.898	2.7012
82	16.345	2.794
82	8.7568	2.1698
82	27.841	3.3265
82	11.366	2.4306
82	3.3898	1.2208
82	3.4211	1.23
82	8.343	2.1214
82	78.317	4.3608
82	12.875	2.5553
82	13.293	2.5872
82	5.9352	1.7809
82	22.1	3.0956
82	6.3564	1.8495
82	16.156	2.7823
82	3.1797	1.1568
82	32.69	3.4871
82	7.8669	2.0627
82	50.084	3.9137
82	17.438	2.8587
82	9.3914	2.2398
82	27.082	3.2989
82	1.0355	0.034856
82	6.0297	1.7967
82	7.4918	2.0138
82	0.26964	-1.3107
82	1.0527	0.051333
82	41.845	3.734
82	15.015	2.709
82	16.741	2.8178
83	17.986	2.8896
83	19.014	2.9452
83	7.3999	2.0015
83	26.19	3.2654
83	12.327	2.5118
83	1.9084	0.64628
83	4.6881	1.545
83	3.1469	1.1464
83	0.85331	-0.15863
83	12.418	2.5192
83	15.683	2.7526
83	21.107	3.0496
83	1.7501	0.55968
83	3.3994	1.2236
83	5.3864	1.6839
83	0.86723	-0.14246
83	33.524	3.5123
83	0.81192	-0.20835
83	6.291	1.8391
83	31.801	3.4595
83	8.9163	2.1879
83	21.52	3.069
83	10.071	2.3097
83	1.9563	0.67107
83	2.6523	0.97542
83	1.6294	0.48818
83	5.7399	1.7474
83	20.779	3.0339
83	3.0322	1.1093
83	49.636	3.9047
83	1.9817	0.68393
84	16.083	2.7778
84	6.3085	1.8419
84	1.5347	0.42834
84	6.5377	1.8776
84	20.589	3.0248
84	0.50546	-0.6823
84	33.608	3.5148
84	1.4607	0.37889
84	1.0946	0.090393
84	21.613	3.0733
84	14.072	2.6442
84	29.077	3.3699
84	2.5134	0.92162
84	3.9493	1.3735
84	0.9978	-0.002204
84	8.5278	2.1433
84	3.6562	1.2964
84	13.025	2.5669
84	9.2446	2.224
84	1.1442	0.13471
84	11.415	2.435
84	9.0133	2.1987
84	17.833	2.881
85	3.3279	1.2023
85	7.1697	1.9699
85	22.007	3.0914
85	12.595	2.5333
85	8.1133	2.0935
85	12.177	2.4995
85	17.316	2.8516
85	105.88	4.6624
85	4.7871	1.5659
85	11.41	2.4345
85	56.313	4.0309
85	97.845	4.5834
85	2.2944	0.83047
85	18.653	2.926
85	6.0241	1.7958
85	0.39274	-0.9346
85	3.7098	1.311
85	16.886	2.8265
85	6.6787	1.8989
85	1.1913	0.17503
85	6.6667	1.8971
85	78.889	4.368
85	2.5094	0.92004
85	5.8279	1.7627
85	0.94317	-0.058511
85	0.81917	-0.19946
85	6.6136	1.8891
85	100.97	4.6148
85	9.4527	2.2463
85	9.5919	2.2609
85	21.146	3.0515
85	2.9881	1.0946
85	23.3	3.1484
86	21.866	3.0849
86	7.5891	2.0267
86	3.7713	1.3274
86	4.7564	1.5595
86	5.9654	1.786
86	13.503	2.6029
86	8.214	2.1058
86	16.022	2.774
86	9.4727	2.2484
86	20.85	3.0374
86	5.3247	1.6724
86	22.015	3.0917
86	31.529	3.4509
86	15.04	2.7107
86	4.4144	1.4849
86	1.9665	0.67625
86	18.4	2.9124
86	20.528	3.0218
86	0.61024	-0.49391
86	0.71518	-0.33522
86	21.935	3.0881
86	7.297	1.9875
86	64.39	4.165
86	121.54	4.8002
86	2.956	1.0838
86	6.3055	1.8414
86	13.254	2.5843
86	5.2331	1.655
86	114.75	4.7428
86	11.098	2.4068
86	12.73	2.544
86	4.3218	1.4637
86	3.9585	1.3759
86	39.759	3.6828
86	64.712	4.1699
86	4.2537	1.4478
87	1.6852	0.52187
87	0.50028	-0.69258
87	27.295	3.3067
87	0.75385	-0.28256
87	8.0558	2.0864
87	27.899	3.3286
87	24.745	3.2086
87	32.921	3.4941
87	1.4018	0.33777
87	15.721	2.755
87	19.609	2.976
87	7.2166	1.9764
87	15.569	2.7453
87	1.8666	0.62413
87	9.5506	2.2566
87	24.435	3.196
87	1.7597	0.56515
88	4.2083	1.4371
88	1.7521	0.56082
88	4.2096	1.4374
88	10.593	2.3602
88	6.5435	1.8785
88	3.6041	1.2821
88	26.202	3.2658
88	4.2113	1.4378
88	2.8462	1.046
88	0.90396	-0.10097
88	3.7702	1.3271
88	0.55278	-0.5928
88	4.0512	1.399
88	1.5276	0.42371
88	1.7202	0.54247
88	27.101	3.2996
88	6.5332	1.8769
88	4.0777	1.4055
88	9.8407	2.2865
88	6.1822	1.8217
88	9.5685	2.2585
89	1.9085	0.64633
89	22.947	3.1332
89	18.819	2.9349
89	0.96403	-0.036633
89	3.8054	1.3364
89	29.719	3.3918
89	6.5586	1.8808
89	38.691	3.6556
89	5.2916	1.6661
89	5.9629	1.7856
89	5.9155	1.7776
89	18.237	2.9035
89	2.1462	0.76371
89	13.286	2.5867
89	3.6665	1.2992
89	6.7909	1.9156
89	1.988	0.68715
90	0.27308	-1.298
90	1.7115	0.53739
90	8.8791	2.1837
90	3.8817	1.3563
90	3.7021	1.3089
90	4.9992	1.6093
90	34.437	3.5391
90	8.5069	2.1409
90	14.326	2.662
90	17.912	2.8855
90	8.1825	2.102
90	20.393	3.0152
90	3.0888	1.1278
90	58.203	4.0639
90	5.6073	1.7241
91	14.005	2.6394
91	1.9906	0.68842
91	4.7871	1.5659
91	3.6296	1.2891
91	4.2101	1.4375
91	2.517	0.92306
91	14.152	2.6499
91	7.6573	2.0357
91	1.0048	0.0047613
91	1.325	0.28138
91	17.955	2.8879
91	4.7528	1.5587
91	7.1723	1.9702
91	49.041	3.8927
91	4.2286	1.4419
91	7.9537	2.0736
92	2.9798	1.0919
92	4.6483	1.5365
92	3.3188	1.1996
92	15.754	2.7571
92	14.659	2.685
93	10.574	2.3584
93	9.4306	2.244
93	21.361	3.0616
93	8.2004	2.1042
93	1.8388	0.60913
93	5.6571	1.7329
93	7.9763	2.0765
93	4.611	1.5284
93	1.7483	0.55865
93	3.7004	1.3084
93	17.618	2.8689
93	9.2556	2.2252
94	2.8435	1.045
94	13.463	2.5999
94	4.7689	1.5621
94	18.976	2.9432
95	22.122	3.0966
95	6.4589	1.8655
95	18.889	2.9386
95	6.1877	1.8226
95	1.9706	0.67834
95	10.464	2.3479
96	1.4789	0.39132
96	33.401	3.5086
96	0.3441	-1.0668
96	3.562	1.2703
96	3.393	1.2217
96	0.088987	-2.4193
96	7.8843	2.0649
97	19.221	2.956
97	16.05	2.7757
97	1.077	0.074166
98	0.54391	-0.60897
102	1.9382	0.66175
104	2.2645	0.81736
