# Supplementary material for: Quantifying the Potential for Future Gene Therapy to Lower Lifetime Risk of Polygenic Late-Onset Diseases
Source: MDPI journal article supplement (doi:10.3390/ijms20133352), 2019-07-08
Supplement: s2 [file s2 › SuppFiles/Results/LODsCommonLow/ProstateCancer/DensityPostAnalysis.csv]

age	A..1..	A..2..	A..3..	A..4..	A..5..	A..6..	A..7..	A..8..	A..9..	A..10..	A..11..	A..12..	A..13..	A..14..	A..15..	A..16..	A..17..	A..18..	A..19..	A..20..
1	0.0000000e+00	0.0000000e+00	0.0000000e+00	0.0000000e+00	0.0000000e+00	0.0000000e+00	0.0000000e+00	0.0000000e+00	0.0000000e+00	0.0000000e+00	0.0000000e+00	0.0000000e+00	0.0000000e+00	0.0000000e+00	0.0000000e+00	0.0000000e+00	0.0000000e+00	0.0000000e+00	0.0000000e+00	0.0000000e+00
2	0.0000000e+00	0.0000000e+00	0.0000000e+00	0.0000000e+00	0.0000000e+00	0.0000000e+00	0.0000000e+00	0.0000000e+00	0.0000000e+00	0.0000000e+00	0.0000000e+00	0.0000000e+00	0.0000000e+00	0.0000000e+00	0.0000000e+00	0.0000000e+00	0.0000000e+00	0.0000000e+00	0.0000000e+00	0.0000000e+00
3	0.0000000e+00	0.0000000e+00	0.0000000e+00	0.0000000e+00	0.0000000e+00	0.0000000e+00	0.0000000e+00	0.0000000e+00	0.0000000e+00	0.0000000e+00	0.0000000e+00	0.0000000e+00	0.0000000e+00	0.0000000e+00	0.0000000e+00	0.0000000e+00	0.0000000e+00	0.0000000e+00	0.0000000e+00	0.0000000e+00
4	0.0000000e+00	0.0000000e+00	0.0000000e+00	0.0000000e+00	0.0000000e+00	0.0000000e+00	0.0000000e+00	0.0000000e+00	0.0000000e+00	0.0000000e+00	0.0000000e+00	0.0000000e+00	0.0000000e+00	0.0000000e+00	0.0000000e+00	0.0000000e+00	0.0000000e+00	0.0000000e+00	0.0000000e+00	0.0000000e+00
5	0.0000000e+00	0.0000000e+00	0.0000000e+00	0.0000000e+00	0.0000000e+00	0.0000000e+00	0.0000000e+00	0.0000000e+00	0.0000000e+00	0.0000000e+00	0.0000000e+00	0.0000000e+00	0.0000000e+00	0.0000000e+00	0.0000000e+00	0.0000000e+00	0.0000000e+00	0.0000000e+00	0.0000000e+00	0.0000000e+00
6	0.0000000e+00	0.0000000e+00	0.0000000e+00	0.0000000e+00	0.0000000e+00	0.0000000e+00	0.0000000e+00	0.0000000e+00	0.0000000e+00	0.0000000e+00	0.0000000e+00	0.0000000e+00	0.0000000e+00	0.0000000e+00	0.0000000e+00	0.0000000e+00	0.0000000e+00	0.0000000e+00	0.0000000e+00	0.0000000e+00
7	0.0000000e+00	0.0000000e+00	0.0000000e+00	0.0000000e+00	0.0000000e+00	0.0000000e+00	0.0000000e+00	0.0000000e+00	0.0000000e+00	0.0000000e+00	0.0000000e+00	0.0000000e+00	0.0000000e+00	0.0000000e+00	0.0000000e+00	0.0000000e+00	0.0000000e+00	0.0000000e+00	0.0000000e+00	0.0000000e+00
8	0.0000000e+00	0.0000000e+00	0.0000000e+00	0.0000000e+00	0.0000000e+00	0.0000000e+00	0.0000000e+00	0.0000000e+00	0.0000000e+00	0.0000000e+00	0.0000000e+00	0.0000000e+00	0.0000000e+00	0.0000000e+00	0.0000000e+00	0.0000000e+00	0.0000000e+00	0.0000000e+00	0.0000000e+00	0.0000000e+00
9	0.0000000e+00	0.0000000e+00	0.0000000e+00	0.0000000e+00	0.0000000e+00	0.0000000e+00	0.0000000e+00	0.0000000e+00	0.0000000e+00	0.0000000e+00	0.0000000e+00	0.0000000e+00	0.0000000e+00	0.0000000e+00	0.0000000e+00	0.0000000e+00	0.0000000e+00	0.0000000e+00	0.0000000e+00	0.0000000e+00
10	0.0000000e+00	0.0000000e+00	0.0000000e+00	0.0000000e+00	0.0000000e+00	0.0000000e+00	0.0000000e+00	0.0000000e+00	0.0000000e+00	0.0000000e+00	0.0000000e+00	0.0000000e+00	0.0000000e+00	0.0000000e+00	0.0000000e+00	0.0000000e+00	0.0000000e+00	0.0000000e+00	0.0000000e+00	0.0000000e+00
11	0.0000000e+00	0.0000000e+00	0.0000000e+00	0.0000000e+00	0.0000000e+00	0.0000000e+00	0.0000000e+00	0.0000000e+00	0.0000000e+00	0.0000000e+00	0.0000000e+00	0.0000000e+00	0.0000000e+00	0.0000000e+00	0.0000000e+00	0.0000000e+00	0.0000000e+00	0.0000000e+00	0.0000000e+00	0.0000000e+00
12	0.0000000e+00	0.0000000e+00	0.0000000e+00	0.0000000e+00	0.0000000e+00	0.0000000e+00	0.0000000e+00	0.0000000e+00	0.0000000e+00	0.0000000e+00	0.0000000e+00	0.0000000e+00	0.0000000e+00	0.0000000e+00	0.0000000e+00	0.0000000e+00	0.0000000e+00	0.0000000e+00	0.0000000e+00	0.0000000e+00
13	0.0000000e+00	0.0000000e+00	0.0000000e+00	0.0000000e+00	0.0000000e+00	0.0000000e+00	0.0000000e+00	0.0000000e+00	0.0000000e+00	0.0000000e+00	0.0000000e+00	0.0000000e+00	0.0000000e+00	0.0000000e+00	0.0000000e+00	0.0000000e+00	0.0000000e+00	0.0000000e+00	0.0000000e+00	0.0000000e+00
14	0.0000000e+00	0.0000000e+00	0.0000000e+00	0.0000000e+00	0.0000000e+00	0.0000000e+00	0.0000000e+00	0.0000000e+00	0.0000000e+00	0.0000000e+00	0.0000000e+00	0.0000000e+00	0.0000000e+00	0.0000000e+00	0.0000000e+00	0.0000000e+00	0.0000000e+00	0.0000000e+00	0.0000000e+00	0.0000000e+00
15	0.0000000e+00	0.0000000e+00	0.0000000e+00	0.0000000e+00	0.0000000e+00	0.0000000e+00	0.0000000e+00	0.0000000e+00	0.0000000e+00	0.0000000e+00	0.0000000e+00	0.0000000e+00	0.0000000e+00	0.0000000e+00	0.0000000e+00	0.0000000e+00	0.0000000e+00	0.0000000e+00	0.0000000e+00	0.0000000e+00
16	0.0000000e+00	0.0000000e+00	0.0000000e+00	0.0000000e+00	0.0000000e+00	0.0000000e+00	0.0000000e+00	0.0000000e+00	0.0000000e+00	0.0000000e+00	0.0000000e+00	0.0000000e+00	0.0000000e+00	0.0000000e+00	0.0000000e+00	0.0000000e+00	0.0000000e+00	0.0000000e+00	0.0000000e+00	0.0000000e+00
17	0.0000000e+00	0.0000000e+00	0.0000000e+00	0.0000000e+00	0.0000000e+00	0.0000000e+00	0.0000000e+00	0.0000000e+00	0.0000000e+00	0.0000000e+00	0.0000000e+00	0.0000000e+00	0.0000000e+00	0.0000000e+00	0.0000000e+00	0.0000000e+00	0.0000000e+00	0.0000000e+00	0.0000000e+00	0.0000000e+00
18	0.0000000e+00	0.0000000e+00	0.0000000e+00	0.0000000e+00	0.0000000e+00	0.0000000e+00	0.0000000e+00	0.0000000e+00	0.0000000e+00	0.0000000e+00	0.0000000e+00	0.0000000e+00	0.0000000e+00	0.0000000e+00	0.0000000e+00	0.0000000e+00	0.0000000e+00	0.0000000e+00	0.0000000e+00	0.0000000e+00
19	0.0000000e+00	0.0000000e+00	0.0000000e+00	0.0000000e+00	0.0000000e+00	0.0000000e+00	0.0000000e+00	0.0000000e+00	0.0000000e+00	0.0000000e+00	0.0000000e+00	0.0000000e+00	0.0000000e+00	0.0000000e+00	0.0000000e+00	0.0000000e+00	0.0000000e+00	0.0000000e+00	0.0000000e+00	0.0000000e+00
20	0.0000000e+00	0.0000000e+00	0.0000000e+00	0.0000000e+00	0.0000000e+00	0.0000000e+00	0.0000000e+00	0.0000000e+00	0.0000000e+00	0.0000000e+00	0.0000000e+00	0.0000000e+00	0.0000000e+00	0.0000000e+00	0.0000000e+00	0.0000000e+00	0.0000000e+00	0.0000000e+00	0.0000000e+00	0.0000000e+00
21	0.0000000e+00	0.0000000e+00	0.0000000e+00	0.0000000e+00	0.0000000e+00	0.0000000e+00	0.0000000e+00	0.0000000e+00	0.0000000e+00	0.0000000e+00	0.0000000e+00	0.0000000e+00	0.0000000e+00	0.0000000e+00	0.0000000e+00	0.0000000e+00	0.0000000e+00	0.0000000e+00	0.0000000e+00	0.0000000e+00
22	0.0000000e+00	0.0000000e+00	0.0000000e+00	0.0000000e+00	0.0000000e+00	0.0000000e+00	0.0000000e+00	0.0000000e+00	0.0000000e+00	0.0000000e+00	0.0000000e+00	0.0000000e+00	0.0000000e+00	0.0000000e+00	0.0000000e+00	0.0000000e+00	0.0000000e+00	0.0000000e+00	0.0000000e+00	0.0000000e+00
23	0.0000000e+00	0.0000000e+00	0.0000000e+00	0.0000000e+00	0.0000000e+00	0.0000000e+00	0.0000000e+00	0.0000000e+00	0.0000000e+00	0.0000000e+00	0.0000000e+00	0.0000000e+00	0.0000000e+00	0.0000000e+00	0.0000000e+00	0.0000000e+00	0.0000000e+00	0.0000000e+00	0.0000000e+00	0.0000000e+00
24	0.0000000e+00	0.0000000e+00	0.0000000e+00	0.0000000e+00	0.0000000e+00	0.0000000e+00	0.0000000e+00	0.0000000e+00	0.0000000e+00	0.0000000e+00	0.0000000e+00	0.0000000e+00	0.0000000e+00	0.0000000e+00	0.0000000e+00	0.0000000e+00	0.0000000e+00	0.0000000e+00	0.0000000e+00	0.0000000e+00
25	0.0000000e+00	0.0000000e+00	0.0000000e+00	0.0000000e+00	0.0000000e+00	0.0000000e+00	0.0000000e+00	0.0000000e+00	0.0000000e+00	0.0000000e+00	0.0000000e+00	0.0000000e+00	0.0000000e+00	0.0000000e+00	0.0000000e+00	0.0000000e+00	0.0000000e+00	0.0000000e+00	0.0000000e+00	0.0000000e+00
26	0.0000000e+00	0.0000000e+00	0.0000000e+00	0.0000000e+00	0.0000000e+00	0.0000000e+00	0.0000000e+00	0.0000000e+00	0.0000000e+00	0.0000000e+00	0.0000000e+00	0.0000000e+00	0.0000000e+00	0.0000000e+00	0.0000000e+00	0.0000000e+00	0.0000000e+00	0.0000000e+00	0.0000000e+00	0.0000000e+00
27	0.0000000e+00	0.0000000e+00	0.0000000e+00	0.0000000e+00	0.0000000e+00	0.0000000e+00	0.0000000e+00	0.0000000e+00	0.0000000e+00	0.0000000e+00	0.0000000e+00	0.0000000e+00	0.0000000e+00	0.0000000e+00	0.0000000e+00	0.0000000e+00	0.0000000e+00	0.0000000e+00	0.0000000e+00	0.0000000e+00
28	0.0000000e+00	0.0000000e+00	0.0000000e+00	0.0000000e+00	0.0000000e+00	0.0000000e+00	0.0000000e+00	0.0000000e+00	0.0000000e+00	0.0000000e+00	0.0000000e+00	0.0000000e+00	0.0000000e+00	0.0000000e+00	0.0000000e+00	0.0000000e+00	0.0000000e+00	0.0000000e+00	0.0000000e+00	0.0000000e+00
29	0.0000000e+00	0.0000000e+00	0.0000000e+00	0.0000000e+00	0.0000000e+00	0.0000000e+00	0.0000000e+00	0.0000000e+00	0.0000000e+00	0.0000000e+00	0.0000000e+00	0.0000000e+00	0.0000000e+00	0.0000000e+00	0.0000000e+00	0.0000000e+00	0.0000000e+00	0.0000000e+00	0.0000000e+00	0.0000000e+00
30	0.0000000e+00	0.0000000e+00	0.0000000e+00	0.0000000e+00	0.0000000e+00	0.0000000e+00	0.0000000e+00	0.0000000e+00	0.0000000e+00	0.0000000e+00	0.0000000e+00	0.0000000e+00	0.0000000e+00	0.0000000e+00	0.0000000e+00	0.0000000e+00	0.0000000e+00	0.0000000e+00	0.0000000e+00	0.0000000e+00
31	0.0000000e+00	0.0000000e+00	0.0000000e+00	0.0000000e+00	0.0000000e+00	0.0000000e+00	0.0000000e+00	0.0000000e+00	0.0000000e+00	0.0000000e+00	0.0000000e+00	0.0000000e+00	0.0000000e+00	0.0000000e+00	0.0000000e+00	0.0000000e+00	0.0000000e+00	0.0000000e+00	0.0000000e+00	0.0000000e+00
32	0.0000000e+00	0.0000000e+00	0.0000000e+00	0.0000000e+00	0.0000000e+00	0.0000000e+00	0.0000000e+00	0.0000000e+00	0.0000000e+00	0.0000000e+00	0.0000000e+00	0.0000000e+00	0.0000000e+00	0.0000000e+00	0.0000000e+00	0.0000000e+00	0.0000000e+00	0.0000000e+00	0.0000000e+00	0.0000000e+00
33	0.0000000e+00	0.0000000e+00	0.0000000e+00	0.0000000e+00	0.0000000e+00	0.0000000e+00	0.0000000e+00	0.0000000e+00	0.0000000e+00	0.0000000e+00	0.0000000e+00	0.0000000e+00	0.0000000e+00	0.0000000e+00	0.0000000e+00	0.0000000e+00	0.0000000e+00	0.0000000e+00	0.0000000e+00	0.0000000e+00
34	0.0000000e+00	0.0000000e+00	0.0000000e+00	0.0000000e+00	0.0000000e+00	0.0000000e+00	0.0000000e+00	0.0000000e+00	0.0000000e+00	0.0000000e+00	0.0000000e+00	0.0000000e+00	0.0000000e+00	0.0000000e+00	0.0000000e+00	0.0000000e+00	0.0000000e+00	0.0000000e+00	0.0000000e+00	0.0000000e+00
35	0.0000000e+00	0.0000000e+00	0.0000000e+00	0.0000000e+00	0.0000000e+00	0.0000000e+00	0.0000000e+00	0.0000000e+00	0.0000000e+00	0.0000000e+00	0.0000000e+00	0.0000000e+00	0.0000000e+00	0.0000000e+00	0.0000000e+00	0.0000000e+00	0.0000000e+00	0.0000000e+00	0.0000000e+00	0.0000000e+00
36	0.0000000e+00	0.0000000e+00	0.0000000e+00	0.0000000e+00	0.0000000e+00	0.0000000e+00	0.0000000e+00	0.0000000e+00	0.0000000e+00	0.0000000e+00	0.0000000e+00	0.0000000e+00	0.0000000e+00	0.0000000e+00	0.0000000e+00	0.0000000e+00	0.0000000e+00	0.0000000e+00	0.0000000e+00	0.0000000e+00
37	0.0000000e+00	0.0000000e+00	0.0000000e+00	0.0000000e+00	0.0000000e+00	0.0000000e+00	0.0000000e+00	0.0000000e+00	0.0000000e+00	0.0000000e+00	0.0000000e+00	0.0000000e+00	0.0000000e+00	0.0000000e+00	0.0000000e+00	0.0000000e+00	0.0000000e+00	0.0000000e+00	0.0000000e+00	0.0000000e+00
38	0.0000000e+00	0.0000000e+00	0.0000000e+00	0.0000000e+00	0.0000000e+00	0.0000000e+00	0.0000000e+00	0.0000000e+00	0.0000000e+00	0.0000000e+00	0.0000000e+00	0.0000000e+00	0.0000000e+00	0.0000000e+00	0.0000000e+00	0.0000000e+00	0.0000000e+00	0.0000000e+00	0.0000000e+00	0.0000000e+00
39	0.0000000e+00	0.0000000e+00	0.0000000e+00	0.0000000e+00	0.0000000e+00	0.0000000e+00	0.0000000e+00	0.0000000e+00	0.0000000e+00	0.0000000e+00	0.0000000e+00	0.0000000e+00	0.0000000e+00	0.0000000e+00	0.0000000e+00	0.0000000e+00	0.0000000e+00	0.0000000e+00	0.0000000e+00	0.0000000e+00
40	0.0000000e+00	0.0000000e+00	0.0000000e+00	0.0000000e+00	0.0000000e+00	0.0000000e+00	0.0000000e+00	0.0000000e+00	0.0000000e+00	0.0000000e+00	0.0000000e+00	0.0000000e+00	0.0000000e+00	0.0000000e+00	0.0000000e+00	0.0000000e+00	0.0000000e+00	0.0000000e+00	0.0000000e+00	0.0000000e+00
41	0.0000000e+00	0.0000000e+00	0.0000000e+00	0.0000000e+00	0.0000000e+00	0.0000000e+00	0.0000000e+00	0.0000000e+00	0.0000000e+00	0.0000000e+00	0.0000000e+00	0.0000000e+00	0.0000000e+00	0.0000000e+00	0.0000000e+00	0.0000000e+00	0.0000000e+00	0.0000000e+00	0.0000000e+00	0.0000000e+00
42	0.0000000e+00	0.0000000e+00	0.0000000e+00	0.0000000e+00	0.0000000e+00	0.0000000e+00	0.0000000e+00	0.0000000e+00	0.0000000e+00	0.0000000e+00	0.0000000e+00	0.0000000e+00	0.0000000e+00	0.0000000e+00	0.0000000e+00	0.0000000e+00	0.0000000e+00	0.0000000e+00	0.0000000e+00	0.0000000e+00
43	0.0000000e+00	0.0000000e+00	0.0000000e+00	0.0000000e+00	0.0000000e+00	0.0000000e+00	0.0000000e+00	0.0000000e+00	0.0000000e+00	0.0000000e+00	0.0000000e+00	0.0000000e+00	0.0000000e+00	0.0000000e+00	0.0000000e+00	0.0000000e+00	0.0000000e+00	0.0000000e+00	0.0000000e+00	0.0000000e+00
44	2.3478650e-05	2.3732408e-05	2.3938324e-05	2.4118347e-05	5.8717260e-06	5.9351877e-06	5.9866849e-06	6.0317064e-06	1.4679587e-06	1.4838244e-06	1.4966989e-06	1.5079545e-06	3.6698977e-07	3.7095620e-07	3.7417484e-07	3.7698873e-07	9.1747424e-08	9.2739033e-08	9.3543691e-08	9.4247165e-08
45	5.3725359e-05	5.4343191e-05	5.4832025e-05	5.5255229e-05	1.3442177e-05	1.3596760e-05	1.3719067e-05	1.3824953e-05	3.3606871e-06	3.3993344e-06	3.4299124e-06	3.4563851e-06	8.4017232e-07	8.4983416e-07	8.5747868e-07	8.6409686e-07	2.1004299e-07	2.1245844e-07	2.1436957e-07	2.1602412e-07
46	9.2626009e-05	9.3768574e-05	9.4646040e-05	9.5396337e-05	2.3188827e-05	2.3474867e-05	2.3694539e-05	2.3882376e-05	5.7976326e-06	5.8691479e-06	5.9240701e-06	5.9710326e-06	1.4494098e-06	1.4672886e-06	1.4810192e-06	1.4927599e-06	3.6235217e-07	3.6682187e-07	3.7025451e-07	3.7318967e-07
47	1.4282083e-04	1.4472573e-04	1.4613890e-04	1.4732814e-04	3.5782357e-05	3.6259612e-05	3.6613667e-05	3.6911620e-05	8.9466067e-06	9.0659339e-06	9.1544579e-06	9.2289545e-06	2.2366556e-06	2.2664875e-06	2.2886185e-06	2.3072427e-06	5.5916323e-07	5.6662119e-07	5.7215394e-07	5.7680998e-07
48	2.0726974e-04	2.1027502e-04	2.1242983e-04	2.1421229e-04	5.1980637e-05	5.2734324e-05	5.3274724e-05	5.3721742e-05	1.2997314e-05	1.3185767e-05	1.3320889e-05	1.3432662e-05	3.2493369e-06	3.2964502e-06	3.3302309e-06	3.3581743e-06	8.1233277e-07	8.2411109e-07	8.3255625e-07	8.3954207e-07
49	2.9011296e-04	2.9471287e-04	2.9789813e-04	3.0048287e-04	7.2849586e-05	7.4004658e-05	7.4804502e-05	7.5453550e-05	1.8216644e-05	1.8505480e-05	1.8705488e-05	1.8867787e-05	4.5541777e-06	4.6263868e-06	4.6763889e-06	4.7169640e-06	1.1385416e-06	1.1565938e-06	1.1690943e-06	1.1792381e-06
50	3.9642702e-04	4.0331616e-04	4.0795422e-04	4.1162390e-04	9.9710244e-05	1.0144302e-04	1.0260959e-04	1.0353260e-04	2.4935552e-05	2.5368884e-05	2.5660622e-05	2.5891447e-05	6.2339193e-06	6.3422529e-06	6.4151876e-06	6.4728943e-06	1.5584745e-06	1.5855578e-06	1.6037914e-06	1.6182180e-06
51	5.3239329e-04	5.4256407e-04	5.4925673e-04	5.5439656e-04	1.3419405e-04	1.3675768e-04	1.3844462e-04	1.3974016e-04	3.3563056e-05	3.4204241e-05	3.4626159e-05	3.4950183e-05	8.3908208e-06	8.5511181e-06	8.6565983e-06	8.7376049e-06	2.0976954e-06	2.1377696e-06	2.1641395e-06	2.1843911e-06
52	7.0595681e-04	7.2080917e-04	7.3042312e-04	7.3755531e-04	1.7843081e-04	1.8218475e-04	1.8461467e-04	1.8641734e-04	4.4633545e-05	4.5572574e-05	4.6180408e-05	4.6631334e-05	1.1158487e-05	1.1393247e-05	1.1545206e-05	1.1657939e-05	2.7896045e-06	2.8482939e-06	2.8862836e-06	2.9144666e-06
53	9.2606078e-04	9.4751439e-04	9.6125276e-04	9.7110329e-04	2.3488647e-04	2.4032797e-04	2.4381258e-04	2.4631107e-04	5.8766656e-05	6.0128075e-05	6.0999895e-05	6.1624997e-05	1.4691840e-05	1.5032199e-05	1.5250156e-05	1.5406434e-05	3.6729297e-06	3.7580188e-06	3.8125077e-06	3.8515767e-06
54	1.2037134e-03	1.2343884e-03	1.2539603e-03	1.2675131e-03	3.0668435e-04	3.1449978e-04	3.1948636e-04	3.2293937e-04	7.6748351e-05	7.8704178e-05	7.9952078e-05	8.0816202e-05	1.9187390e-05	1.9676354e-05	1.9988334e-05	2.0204369e-05	4.7967956e-06	4.9190353e-06	4.9970294e-06	5.0510375e-06
55	1.5504123e-03	1.5938550e-03	1.6215531e-03	1.6402007e-03	3.9727026e-04	4.0840181e-04	4.1549905e-04	4.2027721e-04	9.9448109e-05	1.0223465e-04	1.0401130e-04	1.0520741e-04	2.4862538e-05	2.5559188e-05	2.6003358e-05	2.6302392e-05	6.2155467e-06	6.3897069e-06	6.5007477e-06	6.5755051e-06
56	1.9792754e-03	2.0401191e-03	2.0790933e-03	2.1047394e-03	5.1080140e-04	5.2650363e-04	5.3656190e-04	5.4318052e-04	1.2791781e-04	1.3185005e-04	1.3436890e-04	1.3602637e-04	3.1980303e-05	3.2963390e-05	3.3593119e-05	3.4007498e-05	7.9949295e-06	8.2406967e-06	8.3981261e-06	8.5017191e-06
57	2.5023583e-03	2.5865732e-03	2.6409911e-03	2.6762159e-03	6.5156701e-04	6.7349499e-04	6.8766440e-04	6.9683627e-04	1.6324853e-04	1.6874254e-04	1.7229265e-04	1.7459064e-04	4.0813530e-05	4.2187078e-05	4.3074636e-05	4.3649153e-05	1.0203143e-05	1.0546521e-05	1.0768406e-05	1.0912032e-05
58	3.1284636e-03	3.2435395e-03	3.3186810e-03	3.3667998e-03	8.2351459e-04	8.5380636e-04	8.7358609e-04	8.8625254e-04	2.0645380e-04	2.1404790e-04	2.1900665e-04	2.2218211e-04	5.1615704e-05	5.3514311e-05	5.4754052e-05	5.5547952e-05	1.2903539e-05	1.3378176e-05	1.3688102e-05	1.3886571e-05
59	3.8622164e-03	4.0171587e-03	4.1195305e-03	4.1848480e-03	1.0300741e-03	1.0713980e-03	1.0987011e-03	1.1161217e-03	2.5842739e-04	2.6879484e-04	2.7564471e-04	2.8001521e-04	6.4610411e-05	6.7202416e-05	6.8914977e-05	7.0007664e-05	1.6151990e-05	1.6799967e-05	1.7228091e-05	1.7501252e-05
60	4.7031322e-03	4.9080675e-03	5.0455920e-03	5.1332746e-03	1.2739169e-03	1.3294268e-03	1.3666775e-03	1.3904277e-03	3.1988441e-04	3.3382312e-04	3.4317687e-04	3.4914062e-04	7.9976615e-05	8.3461533e-05	8.5800133e-05	8.7291174e-05	1.9993206e-05	2.0864394e-05	2.1449017e-05	2.1821759e-05
61	5.6399812e-03	5.9060557e-03	6.0876102e-03	6.2039072e-03	1.5551966e-03	1.6285653e-03	1.6786281e-03	1.7106964e-03	3.9091792e-04	4.0936006e-04	4.2194395e-04	4.3000472e-04	9.7737803e-05	1.0234873e-04	1.0549497e-04	1.0751033e-04	2.4433020e-05	2.5585685e-05	2.6372199e-05	2.6876010e-05
62	6.6508793e-03	6.9896596e-03	7.2248912e-03	7.3768930e-03	1.8710917e-03	1.9664007e-03	2.0325784e-03	2.0753411e-03	4.7087873e-04	4.9486420e-04	5.1151847e-04	5.2228011e-04	1.1773190e-04	1.2372889e-04	1.2789289e-04	1.3058358e-04	2.9430875e-05	3.0930015e-05	3.1970941e-05	3.2643565e-05
63	7.7099082e-03	8.1332585e-03	8.4324284e-03	8.6277785e-03	2.2172544e-03	2.3390036e-03	2.4250404e-03	2.4812201e-03	5.5873466e-04	5.8941472e-04	6.1109547e-04	6.2525243e-04	1.3970107e-04	1.4737205e-04	1.5279291e-04	1.5633259e-04	3.4922276e-05	3.6839855e-05	3.8194954e-05	3.9079799e-05
64	8.7824277e-03	9.3011146e-03	9.6742516e-03	9.9207867e-03	2.5856302e-03	2.7383365e-03	2.8481916e-03	2.9207738e-03	6.5250808e-04	6.9104496e-04	7.1876792e-04	7.3708474e-04	1.6315108e-04	1.7278672e-04	1.7971848e-04	1.8429836e-04	4.0783634e-05	4.3192300e-05	4.4925065e-05	4.6069919e-05
65	9.8351582e-03	1.0458962e-02	1.0914703e-02	1.1220534e-02	2.9670751e-03	3.1552645e-03	3.2927527e-03	3.3850159e-03	7.4992806e-04	7.9749293e-04	8.3224305e-04	8.5556258e-04	1.8751424e-04	1.9940750e-04	2.0809653e-04	2.1392741e-04	4.6873021e-05	4.9845985e-05	5.2017985e-05	5.3475533e-05
66	1.0835400e-02	1.1572234e-02	1.2118172e-02	1.2490689e-02	3.3507490e-03	3.5786083e-03	3.7474345e-03	3.8626320e-03	8.4826664e-04	9.0595088e-04	9.4869046e-04	9.7785358e-04	2.1210852e-04	2.2653242e-04	2.3721943e-04	2.4451164e-04	5.3019935e-05	5.6625422e-05	5.9296811e-05	6.1119618e-05
67	1.1754804e-02	1.2611326e-02	1.3253718e-02	1.3699761e-02	3.7253769e-03	3.9968291e-03	4.2004183e-03	4.3417801e-03	9.4465365e-04	1.0134865e-03	1.0651112e-03	1.1009567e-03	2.3621616e-04	2.5342822e-04	2.6633726e-04	2.7530063e-04	5.9044973e-05	6.3347327e-05	6.6574093e-05	6.8814592e-05
68	1.2577385e-02	1.3559356e-02	1.4303899e-02	1.4830047e-02	4.0827551e-03	4.4015134e-03	4.6432000e-03	4.8139933e-03	1.0369771e-03	1.1179384e-03	1.1793243e-03	1.2227040e-03	2.5930894e-04	2.7955431e-04	2.9490460e-04	3.0575223e-04	6.4816121e-05	6.9876595e-05	7.3713511e-05	7.6424954e-05
69	1.3294511e-02	1.4408958e-02	1.5259946e-02	1.5872136e-02	4.4166703e-03	4.7869090e-03	5.0696221e-03	5.2730024e-03	1.1236162e-03	1.2178062e-03	1.2897294e-03	1.3414701e-03	2.8098138e-04	3.0453537e-04	3.2252111e-04	3.3545984e-04	7.0232053e-05	7.6119435e-05	8.0615021e-05	8.3849090e-05
70	1.3896532e-02	1.5151435e-02	1.6112428e-02	1.6814515e-02	4.7196957e-03	5.1458999e-03	5.4722833e-03	5.7107337e-03	1.2026170e-03	1.3112173e-03	1.3943824e-03	1.4551415e-03	3.0074462e-04	3.2790286e-04	3.4870039e-04	3.6389474e-04	7.5170620e-05	8.1958777e-05	8.7157087e-05	9.0954888e-05
71	1.4385499e-02	1.5790801e-02	1.6864615e-02	1.7660229e-02	4.9892812e-03	5.4766784e-03	5.8491061e-03	6.1250464e-03	1.2732756e-03	1.3976604e-03	1.4927048e-03	1.5631254e-03	3.1842243e-04	3.4952875e-04	3.7329757e-04	3.9090844e-04	7.9587810e-05	8.7362653e-05	9.3303530e-05	9.7705264e-05
72	1.4764141e-02	1.6331763e-02	1.7521788e-02	1.8414307e-02	5.2235719e-03	5.7781986e-03	6.1992312e-03	6.5150056e-03	1.3350681e-03	1.4768225e-03	1.5844322e-03	1.6651395e-03	3.3388358e-04	3.6933455e-04	3.9624638e-04	4.1643025e-04	8.3450859e-05	9.2311476e-05	9.9037818e-05	1.0408257e-04
73	1.5032723e-02	1.6775046e-02	1.8084746e-02	1.9077778e-02	5.4196005e-03	6.0477431e-03	6.5199164e-03	6.8779243e-03	1.3871761e-03	1.5479526e-03	1.6688079e-03	1.7604420e-03	3.4692316e-04	3.8713225e-04	4.1735733e-04	4.4027438e-04	8.6708594e-05	9.6758293e-05	1.0431263e-04	1.1004042e-04
74	1.5196834e-02	1.7125241e-02	1.8560808e-02	1.9657003e-02	5.5771573e-03	6.2848726e-03	6.8117181e-03	7.2140157e-03	1.4294985e-03	1.6108952e-03	1.7459327e-03	1.8490468e-03	3.5751570e-04	4.0288277e-04	4.3665546e-04	4.6244416e-04	8.9354677e-05	1.0069337e-04	1.0913425e-04	1.1557968e-04
75	1.5267796e-02	1.7393410e-02	1.8964092e-02	2.0166907e-02	5.6996289e-03	6.4931430e-03	7.0794954e-03	7.5285188e-03	1.4628839e-03	1.6665496e-03	1.8170445e-03	1.9322922e-03	3.6587333e-04	4.1681097e-04	4.5445038e-04	4.8327431e-04	9.1442141e-05	1.0417290e-04	1.1358006e-04	1.2078398e-04
76	1.5247276e-02	1.7579401e-02	1.9296712e-02	2.0608936e-02	5.7856866e-03	6.6706280e-03	7.3222740e-03	7.8202068e-03	1.4869471e-03	1.7143809e-03	1.8818569e-03	2.0098278e-03	3.7189958e-04	4.2878295e-04	4.7067026e-04	5.0267701e-04	9.2946909e-05	1.0716347e-04	1.1763215e-04	1.2563142e-04
77	1.5137750e-02	1.7686235e-02	1.9564118e-02	2.0989672e-02	5.8352796e-03	6.8176662e-03	7.5415501e-03	8.0910705e-03	1.5016497e-03	1.7544569e-03	1.9407410e-03	2.0821545e-03	3.7558472e-04	4.3881552e-04	4.8540792e-04	5.2077752e-04	9.3866561e-05	1.0966928e-04	1.2131370e-04	1.3015331e-04
78	1.4939500e-02	1.7714956e-02	1.9768155e-02	2.1311540e-02	5.8472127e-03	6.9335063e-03	7.7371136e-03	8.3411833e-03	1.5066515e-03	1.7865569e-03	1.9936224e-03	2.1492730e-03	3.7684353e-04	4.4685342e-04	4.9864463e-04	5.3757596e-04	9.4179829e-05	1.1167653e-04	1.2462007e-04	1.3434969e-04
79	1.4653584e-02	1.7666796e-02	1.9908630e-02	2.1577522e-02	5.8205020e-03	7.0173701e-03	7.9078416e-03	8.5707367e-03	1.5016634e-03	1.8104500e-03	2.0401876e-03	2.2112116e-03	3.7560354e-04	4.5283879e-04	5.1030192e-04	5.5307928e-04	9.3868620e-05	1.1317080e-04	1.2753164e-04	1.3822231e-04
80	1.4288696e-02	1.7550382e-02	1.9993782e-02	2.1799287e-02	5.7587808e-03	7.0733400e-03	8.0581049e-03	8.7857786e-03	1.4876219e-03	1.8272019e-03	2.0815887e-03	2.2695631e-03	3.7209901e-04	4.5703820e-04	5.2066799e-04	5.6768604e-04	9.2991481e-05	1.1421868e-04	1.3012044e-04	1.4187075e-04
81	1.3840748e-02	1.7359814e-02	2.0015059e-02	2.1970307e-02	5.6579022e-03	7.0964463e-03	8.1818730e-03	8.9811509e-03	1.4633948e-03	1.8354687e-03	2.1162102e-03	2.3229404e-03	3.6604650e-04	4.5911528e-04	5.2933860e-04	5.8104908e-04	9.1477622e-05	1.1473617e-04	1.3228548e-04	1.4520829e-04
82	1.3310362e-02	1.7092794e-02	1.9970416e-02	2.2090828e-02	5.5169853e-03	7.0847579e-03	8.2774980e-03	9.1563833e-03	1.4287216e-03	1.8347242e-03	2.1436055e-03	2.3712085e-03	3.5738071e-04	4.5893829e-04	5.3620191e-04	5.9313458e-04	8.9310743e-05	1.1469035e-04	1.3399882e-04	1.4822650e-04
83	1.2701805e-02	1.6750977e-02	1.9862969e-02	2.2165127e-02	5.3374246e-03	7.0389265e-03	8.3466164e-03	9.3140059e-03	1.3839481e-03	1.8251328e-03	2.1642055e-03	2.4150413e-03	3.4618805e-04	4.5654833e-04	5.4136575e-04	6.0411113e-04	8.6512454e-05	1.1409151e-04	1.3528740e-04	1.5096748e-04
84	1.2021096e-02	1.6336235e-02	1.9695450e-02	2.2194711e-02	5.1211207e-03	6.9594178e-03	8.3904808e-03	9.4551937e-03	1.3295465e-03	1.8068056e-03	2.1783385e-03	2.4547595e-03	3.3258659e-04	4.5197315e-04	5.4491226e-04	6.1405908e-04	8.3112271e-05	1.1294657e-04	1.3617174e-04	1.5345130e-04
85	1.1270477e-02	1.5843014e-02	1.9459506e-02	2.2168698e-02	4.8663811e-03	6.8407173e-03	8.4022506e-03	9.5720292e-03	1.2650068e-03	1.7782318e-03	2.1841495e-03	2.4882313e-03	3.1644844e-04	4.4483453e-04	5.4637709e-04	6.2244483e-04	7.9078287e-05	1.1116109e-04	1.3653587e-04	1.5554468e-04
86	1.0459727e-02	1.5274311e-02	1.9157866e-02	2.2088130e-02	4.5768799e-03	6.6836057e-03	8.3829390e-03	9.6651393e-03	1.1912614e-03	1.7395959e-03	2.1818951e-03	2.5156237e-03	2.9800679e-04	4.3517853e-04	5.4582440e-04	6.2931018e-04	7.4468788e-05	1.0874657e-04	1.3639582e-04	1.5725805e-04
87	9.5979996e-03	1.4629007e-02	1.8786160e-02	2.1948866e-02	4.2556503e-03	6.4863450e-03	8.3295826e-03	9.7318925e-03	1.1090666e-03	1.6904088e-03	2.1707756e-03	2.5362321e-03	2.7745064e-04	4.2288263e-04	5.4305402e-04	6.3447878e-04	6.9331031e-05	1.0567245e-04	1.3570160e-04	1.5854736e-04
88	8.6966535e-03	1.3907238e-02	1.8340686e-02	2.1748014e-02	3.9068551e-03	6.2476406e-03	8.2393076e-03	9.7700040e-03	1.0194752e-03	1.6302920e-03	2.1500080e-03	2.5494359e-03	2.5504327e-04	4.0785200e-04	5.3786995e-04	6.3779529e-04	6.3730824e-05	1.0191504e-04	1.3440423e-04	1.5937382e-04
89	7.7697189e-03	1.3113793e-02	1.7821170e-02	2.1485732e-02	3.5362969e-03	5.9685897e-03	8.1110976e-03	9.7789802e-03	9.2397808e-04	1.5594975e-03	2.1193007e-03	2.5550918e-03	2.3115755e-04	3.9014952e-04	5.3019910e-04	6.3922378e-04	5.7761360e-05	9.7490078e-05	1.3248549e-04	1.5972844e-04
90	6.8326487e-03	1.2254437e-02	1.7226177e-02	2.1158403e-02	3.1501874e-03	5.6498989e-03	7.9421157e-03	9.7550656e-03	8.2416571e-04	1.4781511e-03	2.0778508e-03	2.5521626e-03	2.0619123e-04	3.6980644e-04	5.1984037e-04	6.3850454e-04	5.1522054e-05	9.2405422e-05	1.2989516e-04	1.5954639e-04
91	5.9048408e-03	1.1339108e-02	1.6558469e-02	2.0768526e-02	2.7577464e-03	5.2957200e-03	7.7333260e-03	9.6995549e-03	7.2244576e-04	1.3873177e-03	2.0258964e-03	2.5409886e-03	1.8074666e-04	3.4708908e-04	5.0685328e-04	6.3572274e-04	4.5163418e-05	8.6727631e-05	1.2664813e-04	1.5884892e-04
92	5.0059816e-03	1.0376624e-02	1.5815765e-02	2.0310162e-02	2.3682129e-03	4.9089385e-03	7.4820689e-03	9.6082632e-03	6.2122829e-04	1.2877100e-03	1.9626921e-03	2.5204342e-03	1.5542675e-04	3.2217556e-04	4.9105112e-04	6.3059409e-04	3.8836113e-05	8.0501245e-05	1.2269778e-04	1.5756505e-04
93	4.1548187e-03	9.3771180e-03	1.4995402e-02	1.9775742e-02	1.9906253e-03	4.4926938e-03	7.1844836e-03	9.4748040e-03	5.2287687e-04	1.1800944e-03	1.8871459e-03	2.4887435e-03	1.3082281e-04	2.9525739e-04	4.7216035e-04	6.2267896e-04	3.2687893e-05	7.3774154e-05	1.1797581e-04	1.5558497e-04
94	3.3701299e-03	8.3572825e-03	1.4105487e-02	1.9168847e-02	1.6353523e-03	4.0553634e-03	6.8446741e-03	9.3016647e-03	4.3014130e-04	1.0666688e-03	1.8003320e-03	2.4465861e-03	1.0762295e-04	2.6688449e-04	4.5044974e-04	6.1214491e-04	2.6890673e-05	6.6683766e-05	1.1254938e-04	1.5295054e-04
95	2.6661492e-03	7.3333756e-03	1.3152497e-02	1.8488588e-02	1.3102890e-03	3.6040149e-03	6.4638440e-03	9.0862859e-03	3.4511528e-04	9.4925670e-04	1.7025033e-03	2.3932248e-03	8.6351079e-05	2.3751292e-04	4.2598228e-04	5.9880727e-04	2.1575347e-05	5.9344062e-05	1.0643429e-04	1.4961567e-04
96	2.0528069e-03	6.3236093e-03	1.2143272e-02	1.7732788e-02	1.0216238e-03	3.1470810e-03	6.0433619e-03	8.8251055e-03	2.6945575e-04	8.3005023e-04	1.5939513e-03	2.3276429e-03	6.7421888e-05	2.0769107e-04	3.9883064e-04	5.8241133e-04	1.6845509e-05	5.1892078e-05	9.9648723e-05	1.4551677e-04
97	1.5375475e-03	5.3495902e-03	1.1088872e-02	1.6901353e-02	7.7483453e-04	2.6958824e-03	5.5881466e-03	8.5172991e-03	2.0464949e-04	7.1203714e-04	1.4759427e-03	2.2495912e-03	5.1207564e-05	1.7816652e-04	3.6931159e-04	5.6289455e-04	1.2794122e-05	4.4514598e-05	9.2271864e-05	1.4063823e-04
98	1.1203839e-03	4.4317807e-03	1.0002201e-02	1.5995002e-02	5.7171658e-04	2.2614770e-03	5.1039861e-03	8.1620305e-03	1.5121531e-04	5.9814592e-04	1.3499710e-03	2.1588038e-03	3.7838102e-05	1.4967206e-04	3.3779875e-04	5.4019029e-04	9.4536328e-06	3.7394706e-05	8.4397081e-05	1.3496345e-04
99	7.9471329e-04	3.5881631e-03	8.8979635e-03	1.5018053e-02	4.1063256e-04	1.8540228e-03	4.5976248e-03	7.7599072e-03	1.0876514e-04	4.9107905e-04	1.2177829e-03	2.0553835e-03	2.7216582e-05	1.2288399e-04	3.0472896e-04	5.1432394e-04	6.7997962e-06	3.0701359e-05	7.6133543e-05	1.2849879e-04
100	5.4960149e-04	2.8333789e-03	7.7933491e-03	1.3977465e-02	2.8752151e-04	1.4822692e-03	4.0770550e-03	7.3122470e-03	7.6266000e-05	3.9317665e-04	1.0814519e-03	1.9395969e-03	1.9084694e-05	9.8387959e-05	2.7062096e-04	4.8536194e-04	4.7680455e-06	2.4580864e-05	6.7610885e-05	1.2126093e-04
101	3.7089368e-04	2.1779351e-03	6.7090628e-03	1.2883461e-02	1.9644605e-04	1.1535563e-03	3.5534951e-03	6.8238017e-03	5.2183832e-05	3.0643013e-04	9.4394869e-04	1.8126713e-03	1.3058722e-05	7.6682488e-05	2.3621807e-04	4.5361123e-04	3.2624860e-06	1.9157735e-05	5.9014820e-05	1.1332658e-04
102	2.4421478e-04	1.6285979e-03	5.6663822e-03	1.1745532e-02	1.3094672e-04	8.7324591e-04	3.0382852e-03	6.2978945e-03	3.4835578e-05	2.3230842e-04	8.0827089e-04	1.6754203e-03	8.7176276e-06	5.8135345e-05	2.0227035e-04	4.1927510e-04	2.1779054e-06	1.4523823e-05	5.0532750e-05	1.0474656e-04
103	1.5634288e-04	1.1848746e-03	4.6868795e-03	1.0577940e-02	8.4865595e-05	6.4317025e-04	2.5441185e-03	5.7418870e-03	2.2610222e-05	1.7135592e-04	6.7781394e-04	1.5297759e-03	5.6583637e-06	4.2882999e-05	1.6962761e-04	3.8283694e-04	1.4135923e-06	1.0713182e-05	4.2376965e-05	9.5641671e-05
104	9.7145737e-05	8.3912498e-04	3.7886837e-03	9.3952166e-03	5.3378014e-05	4.6106835e-04	2.0817425e-03	5.1623264e-03	1.4242415e-05	1.2302307e-04	5.5545418e-04	1.3774210e-03	3.5643512e-06	3.0788136e-05	1.3900970e-04	3.4471766e-04	8.9044349e-07	7.6914686e-06	3.4727296e-05	8.6117104e-05
105	5.8334018e-05	5.7947700e-04	2.9873971e-03	8.2169838e-03	3.2444064e-05	3.2229202e-04	1.6615228e-03	4.5701009e-03	8.6698613e-06	8.6124450e-05	4.4400025e-04	1.2212447e-03	2.1698012e-06	2.1554317e-05	1.1111969e-04	3.0564021e-04	5.4204869e-07	5.3845896e-06	2.7759354e-05	7.6353481e-05
106	3.3942379e-05	3.9053242e-04	2.2932563e-03	7.0643063e-03	1.9109666e-05	2.1987099e-04	1.2911105e-03	3.9772267e-03	5.1144342e-06	5.8845387e-05	3.4554763e-04	1.0644490e-03	1.2800194e-06	1.4727580e-05	8.6482234e-05	2.6640589e-04	3.1976228e-07	3.6791039e-06	2.1604169e-05	6.6550984e-05
107	1.8905905e-05	2.5680520e-04	1.7125599e-03	5.9585109e-03	1.0773063e-05	1.4633410e-04	9.7585993e-04	3.3953103e-03	2.8876992e-06	3.9224581e-05	2.6157742e-04	9.1010653e-04	7.2274006e-07	9.8172191e-06	6.5468203e-05	2.2778357e-04	1.8054484e-07	2.4524008e-06	1.6354354e-05	5.6901716e-05
108	1.0336701e-05	1.6419452e-04	1.2443798e-03	4.9222576e-03	5.9616114e-06	9.4697904e-05	7.1768630e-04	2.8388735e-03	1.6004976e-06	2.5423289e-05	1.9267529e-04	7.6214465e-04	4.0058676e-07	6.3631666e-06	4.8224483e-05	1.9075633e-04	1.0006719e-07	1.5895289e-06	1.2046551e-05	4.7651228e-05
109	5.2154097e-06	1.0190108e-04	8.8020069e-04	3.9741422e-03	3.0441732e-06	5.9478461e-05	5.1376277e-04	2.3196600e-03	8.1854630e-07	1.5993135e-05	1.3814543e-04	6.2373228e-04	2.0487845e-07	4.0030098e-06	3.4577179e-05	1.5611738e-04	5.1178025e-08	9.9993988e-07	8.6372759e-06	3.8997655e-05
110	2.4284997e-06	6.1117243e-05	6.0712493e-04	3.1299314e-03	1.4344991e-06	3.6101560e-05	3.5862477e-04	1.8488302e-03	3.8633460e-07	9.7227541e-06	9.6583650e-05	4.9792091e-04	9.6700396e-08	2.4336266e-06	2.4175099e-05	1.2463069e-04	2.4155026e-08	6.0790148e-07	6.0387564e-06	3.1131802e-05
111	1.2247230e-06	3.5516968e-05	4.0864925e-04	2.3996406e-03	7.3204053e-07	2.1229175e-05	2.4425752e-04	1.4343114e-03	1.9746540e-07	5.7264966e-06	6.5887622e-05	3.8690054e-04	4.9427351e-08	1.4333932e-06	1.6492260e-05	9.6844657e-05	1.2346349e-08	3.5804413e-07	4.1195652e-06	2.4190613e-05
112	4.1167581e-07	1.9760439e-05	2.6841263e-04	1.7899664e-03	2.4898021e-07	1.1951050e-05	1.6233510e-04	1.0825660e-03	6.7269700e-08	3.2289456e-06	4.3859844e-05	2.9248866e-04	1.6838664e-08	8.0825586e-07	1.0978809e-05	7.3214510e-05	4.2060141e-09	2.0188868e-07	2.7423212e-06	1.8287749e-05
113	4.1507292e-07	1.0791896e-05	1.7142512e-04	1.2991782e-03	2.5400948e-07	6.6042466e-06	1.0490592e-04	7.9504968e-04	6.8740600e-08	1.7872556e-06	2.8389868e-05	2.1515808e-04	1.7207328e-08	4.4739054e-07	7.1066266e-06	5.3858938e-05	4.2980186e-09	1.1174848e-07	1.7750817e-06	1.3452798e-05
114	0.0000000e+00	5.4394973e-06	1.0627941e-04	9.1801977e-04	0.0000000e+00	3.3681313e-06	6.5808105e-05	5.6843694e-04	0.0000000e+00	9.1299650e-07	1.7838547e-05	1.5408572e-04	0.0000000e+00	2.2855008e-07	4.4655170e-06	3.8572222e-05	0.0000000e+00	5.7085772e-08	1.1153682e-06	9.6343219e-06
115	0.0000000e+00	2.5302500e-06	6.3677957e-05	6.3256249e-04	0.0000000e+00	1.5851089e-06	3.9891907e-05	3.9627722e-04	0.0000000e+00	4.3038780e-07	1.0831426e-05	1.0759695e-04	0.0000000e+00	1.0774186e-07	2.7115034e-06	2.6935465e-05	0.0000000e+00	2.6910548e-08	6.7724879e-07	6.7276370e-06
116	0.0000000e+00	1.2748381e-06	3.6970305e-05	4.2537098e-04	0.0000000e+00	8.0798070e-07	2.3431440e-05	2.6959623e-04	0.0000000e+00	2.1975060e-07	6.3727674e-06	7.3323450e-05	0.0000000e+00	5.5013207e-08	1.5953830e-06	1.8356074e-05	0.0000000e+00	1.3740310e-08	3.9846899e-07	4.5846834e-06
117	0.0000000e+00	4.2813737e-07	2.0550594e-05	2.7914557e-04	0.0000000e+00	2.7451444e-07	1.3176693e-05	1.7898341e-04	0.0000000e+00	7.4787700e-08	3.5898096e-06	4.8761580e-05	0.0000000e+00	1.8723180e-08	8.9871264e-07	1.2207513e-05	0.0000000e+00	4.6762804e-09	2.2446146e-07	3.0489348e-06
118	0.0000000e+00	4.3128524e-07	1.1213416e-05	1.7812080e-04	0.0000000e+00	2.7975124e-07	7.2735322e-06	1.1553726e-04	0.0000000e+00	7.6345100e-08	1.9849726e-06	3.1530526e-05	0.0000000e+00	1.9113636e-08	4.9695453e-07	7.8939315e-06	0.0000000e+00	4.7737042e-09	1.2411631e-07	1.9715398e-06
119	0.0000000e+00	0.0000000e+00	5.6470543e-06	1.1033475e-04	0.0000000e+00	0.0000000e+00	3.7054554e-06	7.2398899e-05	0.0000000e+00	0.0000000e+00	1.0129847e-06	1.9792163e-05	0.0000000e+00	0.0000000e+00	2.5361672e-07	4.9552805e-06	0.0000000e+00	0.0000000e+00	6.3340463e-08	1.2375752e-06
120	0.0000000e+00	0.0000000e+00	2.6244388e-06	6.6048376e-05	0.0000000e+00	0.0000000e+00	1.7417495e-06	4.3834028e-05	0.0000000e+00	0.0000000e+00	4.7697600e-07	1.2003896e-05	0.0000000e+00	0.0000000e+00	1.1942200e-07	3.0054538e-06	0.0000000e+00	0.0000000e+00	2.9824892e-08	7.5059312e-07
