# Supplementary material for: Quantifying the Potential for Future Gene Therapy to Lower Lifetime Risk of Polygenic Late-Onset Diseases
Source: MDPI journal article supplement (doi:10.3390/ijms20133352), 2019-07-08
Supplement: s2 [file s2 › SuppFiles/Results/LODsCommonLow/ProstateCancer/EnvironmentArray.csv]

Age	Env	Incidence	CasesExpected
0	0	-5.64657e-05	0
1	0	-5.6465e-05	0
2	0	-5.64642e-05	0
3	0	-5.64632e-05	0
4	0	-5.64619e-05	0
5	0	-5.64602e-05	0
6	0	-5.64581e-05	0
7	0	-5.64554e-05	0
8	0	-5.6452e-05	0
9	0	-5.64476e-05	0
10	0	-5.64421e-05	0
11	0	-5.6435e-05	0
12	0	-5.6426e-05	0
13	0	-5.64146e-05	0
14	0	-5.64002e-05	0
15	0	-5.63817e-05	0
16	0	-5.63583e-05	0
17	0	-5.63284e-05	0
18	0	-5.62905e-05	0
19	0	-5.62423e-05	0
20	0	-5.61809e-05	0
21	0	-5.61029e-05	0
22	0	-5.60037e-05	0
23	0	-5.58775e-05	0
24	0	-5.57171e-05	0
25	0	-5.5513e-05	0
26	0	-5.52536e-05	0
27	0	-5.49236e-05	0
28	0	-5.45039e-05	0
29	0	-5.39704e-05	0
30	0	-5.32919e-05	0
31	0	-5.24291e-05	0
32	0	-5.13322e-05	0
33	0	-4.99376e-05	0
34	0	-4.81648e-05	0
35	0	-4.59113e-05	0
36	0	-4.30472e-05	0
37	0	-3.94079e-05	0
38	0	-3.47844e-05	0
39	0	-2.89122e-05	0
40	0	-2.1457e-05	0
41	0	-1.19963e-05	0
42	0	2.28067e-09	0
43	1.54186e-06	1.52083e-05	380
44	3.53913e-06	3.44609e-05	861
45	6.12288e-06	5.88078e-05	1470
46	9.47794e-06	8.95505e-05	2238
47	1.38162e-05	0.000128295	3206
48	1.94371e-05	0.000177007	4423
49	2.67159e-05	0.000238066	5948
50	3.61231e-05	0.000314313	7851
51	4.82791e-05	0.000409075	10216
52	6.39164e-05	0.00052616	13134
53	8.39771e-05	0.000669781	16711
54	0.000109534	0.000844395	21053
55	0.000141907	0.00105441	26268
56	0.000182525	0.00130375	32445
57	0.000232805	0.00159527	39648
58	0.000294112	0.00193002	47891
59	0.000367679	0.00230661	57126
60	0.000454128	0.00272055	67222
61	0.000553298	0.00316416	77971
62	0.000664646	0.0036268	89088
63	0.000786467	0.00409582	100244
64	0.000916648	0.00455783	111095
65	0.00105244	0.00500023	121323
66	0.00119088	0.00541254	130671
67	0.00132985	0.00578719	138960
68	0.00146782	0.00611988	146098
69	0.00160272	0.00640933	152071
70	0.00173407	0.0066567	156928
71	0.00186176	0.00686493	160759
72	0.00198514	0.00703795	163680
73	0.00210437	0.0071802	165813
74	0.002221	0.00729612	167280
75	0.00233481	0.00738991	168195
76	0.0024466	0.00746535	168656
77	0.00255668	0.00752576	168750
78	0.00266517	0.00757394	168553
79	0.00277412	0.00761226	168124
80	0.00288206	0.00764266	167511
81	0.00298927	0.00766673	166755
82	0.00309712	0.00768577	165888
83	0.00320674	0.0077008	164934
84	0.00331605	0.00771267	163915
85	0.00342602	0.00772202	162849
86	0.00353679	0.00772939	161745
87	0.00364841	0.0077352	160615
88	0.00376136	0.00773977	159466
89	0.00387478	0.00774336	158306
90	0.00398987	0.0077462	157137
91	0.00410648	0.00774842	155964
92	0.00422322	0.00775018	154790
93	0.00434223	0.00775156	153618
94	0.00446289	0.00775264	152449
95	0.00458414	0.00775349	151282
96	0.00470675	0.00775416	150122
97	0.00483116	0.00775469	148968
98	0.00495739	0.00775511	147821
99	0.0050844	0.00775543	146681
100	0.00521317	0.00775569	145548
101	0.00534288	0.00775589	144423
102	0.00547463	0.00775605	143305
103	0.00560725	0.00775617	142197
104	0.00574163	0.00775627	141096
105	0.00587866	0.00775635	140002
106	0.00601604	0.00775641	138918
107	0.00615576	0.00775646	137841
108	0.00629651	0.00775649	136773
109	0.00643891	0.00775652	135713
110	0.00658218	0.00775655	134661
111	0.00672697	0.00775656	133617
112	0.00687406	0.00775658	132581
113	0.00702305	0.00775659	131554
114	0.00717313	0.0077566	130533
115	0.00732502	0.00775661	129521
116	0.00747877	0.00775661	128516
117	0.00763451	0.00775662	127519
118	0.00779219	0.00775662	126530
119	0.0079496	0.00775662	125549
