# Supplementary material for: Quantifying the Potential for Future Gene Therapy to Lower Lifetime Risk of Polygenic Late-Onset Diseases
Source: MDPI journal article supplement (doi:10.3390/ijms20133352), 2019-07-08
Supplement: s2 [file s2 › SuppFiles/Results/LODsCommonLow/ProstateCancer/EnvironmentArraySD.csv]

Age	Env	EnvSD	Incidence	CasesExpected
0	0	0	-5.64657e-05	0
1	0	0	-5.6465e-05	0
2	0	0	-5.64642e-05	0
3	0	0	-5.64632e-05	0
4	0	0	-5.64619e-05	0
5	0	0	-5.64602e-05	0
6	0	0	-5.64581e-05	0
7	0	0	-5.64554e-05	0
8	0	0	-5.6452e-05	0
9	0	0	-5.64476e-05	0
10	0	0	-5.64421e-05	0
11	0	0	-5.6435e-05	0
12	0	0	-5.6426e-05	0
13	0	0	-5.64146e-05	0
14	0	0	-5.64002e-05	0
15	0	0	-5.63817e-05	0
16	0	0	-5.63583e-05	0
17	0	0	-5.63284e-05	0
18	0	0	-5.62905e-05	0
19	0	0	-5.62423e-05	0
20	0	0	-5.61809e-05	0
21	0	0	-5.61029e-05	0
22	0	0	-5.60037e-05	0
23	0	0	-5.58775e-05	0
24	0	0	-5.57171e-05	0
25	0	0	-5.5513e-05	0
26	0	0	-5.52536e-05	0
27	0	0	-5.49236e-05	0
28	0	0	-5.45039e-05	0
29	0	0	-5.39704e-05	0
30	0	0	-5.32919e-05	0
31	0	0	-5.24291e-05	0
32	0	0	-5.13322e-05	0
33	0	0	-4.99376e-05	0
34	0	0	-4.81648e-05	0
35	0	0	-4.59113e-05	0
36	0	0	-4.30472e-05	0
37	0	0	-3.94079e-05	0
38	0	0	-3.47844e-05	0
39	0	0	-2.89122e-05	0
40	0	0	-2.1457e-05	0
41	0	0	-1.19963e-05	0
42	0	0	2.28067e-09	0
43	1.54186e-06	4.329e-09	1.52083e-05	380
44	3.53913e-06	4.419e-09	3.44609e-05	861
45	6.12288e-06	8.206e-09	5.88078e-05	1470
46	9.47794e-06	1.211e-08	8.95505e-05	2238
47	1.38162e-05	1.339e-08	0.000128295	3206
48	1.94371e-05	1.826e-08	0.000177007	4423
49	2.67159e-05	1.408e-08	0.000238066	5948
50	3.61231e-05	2.228e-08	0.000314313	7851
51	4.82791e-05	4.346e-08	0.000409075	10216
52	6.39164e-05	2.214e-08	0.00052616	13134
53	8.39771e-05	3.876e-08	0.000669781	16711
54	0.000109534	4.47e-08	0.000844395	21053
55	0.000141907	5.456e-08	0.00105441	26268
56	0.000182525	2.827e-08	0.00130375	32445
57	0.000232805	6.678e-08	0.00159527	39648
58	0.000294112	1.08e-07	0.00193002	47891
59	0.000367679	7.456e-08	0.00230661	57126
60	0.000454128	9.399e-08	0.00272055	67222
61	0.000553298	6.325e-08	0.00316416	77971
62	0.000664646	1.226e-07	0.0036268	89088
63	0.000786467	1.429e-07	0.00409582	100244
64	0.000916648	1.438e-07	0.00455783	111095
65	0.00105244	1.746e-07	0.00500023	121323
66	0.00119088	2.032e-07	0.00541254	130671
67	0.00132985	2.621e-07	0.00578719	138960
68	0.00146782	4.119e-07	0.00611988	146098
69	0.00160272	1.987e-07	0.00640933	152071
70	0.00173407	3.271e-07	0.0066567	156928
71	0.00186176	2.405e-07	0.00686493	160759
72	0.00198514	2.559e-07	0.00703795	163680
73	0.00210437	2.572e-07	0.0071802	165813
74	0.002221	3.415e-07	0.00729612	167280
75	0.00233481	2.578e-07	0.00738991	168195
76	0.0024466	7.489e-07	0.00746535	168656
77	0.00255668	7.082e-07	0.00752576	168750
78	0.00266517	6.883e-07	0.00757394	168553
79	0.00277412	5.267e-07	0.00761226	168124
80	0.00288206	4.517e-07	0.00764266	167511
81	0.00298927	3.764e-07	0.00766673	166755
82	0.00309712	4.609e-07	0.00768577	165888
83	0.00320674	7.041e-07	0.0077008	164934
84	0.00331605	6.474e-07	0.00771267	163915
85	0.00342602	4.828e-07	0.00772202	162849
86	0.00353679	5.576e-07	0.00772939	161745
87	0.00364841	6.486e-07	0.0077352	160615
88	0.00376136	7.936e-07	0.00773977	159466
89	0.00387478	4.439e-07	0.00774336	158306
90	0.00398987	9.466e-07	0.0077462	157137
91	0.00410648	8.373e-07	0.00774842	155964
92	0.00422322	5.554e-07	0.00775018	154790
93	0.00434223	9.61e-07	0.00775156	153618
94	0.00446289	8.106e-07	0.00775264	152449
95	0.00458414	5.236e-07	0.00775349	151282
96	0.00470675	1.019e-06	0.00775416	150122
97	0.00483116	1.065e-06	0.00775469	148968
98	0.00495739	7.742e-07	0.00775511	147821
99	0.0050844	9.005e-07	0.00775543	146681
100	0.00521317	9.645e-07	0.00775569	145548
101	0.00534288	6.583e-07	0.00775589	144423
102	0.00547463	9.591e-07	0.00775605	143305
103	0.00560725	8.911e-07	0.00775617	142197
104	0.00574163	8.795e-07	0.00775627	141096
105	0.00587866	1.157e-06	0.00775635	140002
106	0.00601604	6.249e-07	0.00775641	138918
107	0.00615576	1.021e-06	0.00775646	137841
108	0.00629651	9.784e-07	0.00775649	136773
109	0.00643891	1.271e-06	0.00775652	135713
110	0.00658218	1.247e-06	0.00775655	134661
111	0.00672697	1.125e-06	0.00775656	133617
112	0.00687406	1.626e-06	0.00775658	132581
113	0.00702305	1.653e-06	0.00775659	131554
114	0.00717313	1.191e-06	0.0077566	130533
115	0.00732502	1.622e-06	0.00775661	129521
116	0.00747877	1.237e-06	0.00775661	128516
117	0.00763451	1.491e-06	0.00775662	127519
118	0.00779219	1.33e-06	0.00775662	126530
119	0.0079496	1.311e-06	0.00775662	125549
