# Supplementary material for: Quantifying the Potential for Future Gene Therapy to Lower Lifetime Risk of Polygenic Late-Onset Diseases
Source: MDPI journal article supplement (doi:10.3390/ijms20133352), 2019-07-08
Supplement: s2 [file s2 › SuppFiles/Results/LODsCommonLow/ProstateCancer/LifetimeRiskPostAnalysis.csv]

age	A..1..	A..2..	A..3..	A..4..	A..5..	A..6..	A..7..	A..8..	A..9..	A..10..	A..11..	A..12..	A..13..	A..14..	A..15..	A..16..	A..17..	A..18..	A..19..	A..20..
1	0.0000000e+00	0.0000000e+00	0.0000000e+00	0.0000000e+00	0.0000000e+00	0.0000000e+00	0.0000000e+00	0.0000000e+00	0.0000000e+00	0.0000000e+00	0.0000000e+00	0.0000000e+00	0.0000000e+00	0.0000000e+00	0.0000000e+00	0.0000000e+00	0.0000000e+00	0.0000000e+00	0.0000000e+00	0.0000000e+00
2	0.0000000e+00	0.0000000e+00	0.0000000e+00	0.0000000e+00	0.0000000e+00	0.0000000e+00	0.0000000e+00	0.0000000e+00	0.0000000e+00	0.0000000e+00	0.0000000e+00	0.0000000e+00	0.0000000e+00	0.0000000e+00	0.0000000e+00	0.0000000e+00	0.0000000e+00	0.0000000e+00	0.0000000e+00	0.0000000e+00
3	0.0000000e+00	0.0000000e+00	0.0000000e+00	0.0000000e+00	0.0000000e+00	0.0000000e+00	0.0000000e+00	0.0000000e+00	0.0000000e+00	0.0000000e+00	0.0000000e+00	0.0000000e+00	0.0000000e+00	0.0000000e+00	0.0000000e+00	0.0000000e+00	0.0000000e+00	0.0000000e+00	0.0000000e+00	0.0000000e+00
4	0.0000000e+00	0.0000000e+00	0.0000000e+00	0.0000000e+00	0.0000000e+00	0.0000000e+00	0.0000000e+00	0.0000000e+00	0.0000000e+00	0.0000000e+00	0.0000000e+00	0.0000000e+00	0.0000000e+00	0.0000000e+00	0.0000000e+00	0.0000000e+00	0.0000000e+00	0.0000000e+00	0.0000000e+00	0.0000000e+00
5	0.0000000e+00	0.0000000e+00	0.0000000e+00	0.0000000e+00	0.0000000e+00	0.0000000e+00	0.0000000e+00	0.0000000e+00	0.0000000e+00	0.0000000e+00	0.0000000e+00	0.0000000e+00	0.0000000e+00	0.0000000e+00	0.0000000e+00	0.0000000e+00	0.0000000e+00	0.0000000e+00	0.0000000e+00	0.0000000e+00
6	0.0000000e+00	0.0000000e+00	0.0000000e+00	0.0000000e+00	0.0000000e+00	0.0000000e+00	0.0000000e+00	0.0000000e+00	0.0000000e+00	0.0000000e+00	0.0000000e+00	0.0000000e+00	0.0000000e+00	0.0000000e+00	0.0000000e+00	0.0000000e+00	0.0000000e+00	0.0000000e+00	0.0000000e+00	0.0000000e+00
7	0.0000000e+00	0.0000000e+00	0.0000000e+00	0.0000000e+00	0.0000000e+00	0.0000000e+00	0.0000000e+00	0.0000000e+00	0.0000000e+00	0.0000000e+00	0.0000000e+00	0.0000000e+00	0.0000000e+00	0.0000000e+00	0.0000000e+00	0.0000000e+00	0.0000000e+00	0.0000000e+00	0.0000000e+00	0.0000000e+00
8	0.0000000e+00	0.0000000e+00	0.0000000e+00	0.0000000e+00	0.0000000e+00	0.0000000e+00	0.0000000e+00	0.0000000e+00	0.0000000e+00	0.0000000e+00	0.0000000e+00	0.0000000e+00	0.0000000e+00	0.0000000e+00	0.0000000e+00	0.0000000e+00	0.0000000e+00	0.0000000e+00	0.0000000e+00	0.0000000e+00
9	0.0000000e+00	0.0000000e+00	0.0000000e+00	0.0000000e+00	0.0000000e+00	0.0000000e+00	0.0000000e+00	0.0000000e+00	0.0000000e+00	0.0000000e+00	0.0000000e+00	0.0000000e+00	0.0000000e+00	0.0000000e+00	0.0000000e+00	0.0000000e+00	0.0000000e+00	0.0000000e+00	0.0000000e+00	0.0000000e+00
10	0.0000000e+00	0.0000000e+00	0.0000000e+00	0.0000000e+00	0.0000000e+00	0.0000000e+00	0.0000000e+00	0.0000000e+00	0.0000000e+00	0.0000000e+00	0.0000000e+00	0.0000000e+00	0.0000000e+00	0.0000000e+00	0.0000000e+00	0.0000000e+00	0.0000000e+00	0.0000000e+00	0.0000000e+00	0.0000000e+00
11	0.0000000e+00	0.0000000e+00	0.0000000e+00	0.0000000e+00	0.0000000e+00	0.0000000e+00	0.0000000e+00	0.0000000e+00	0.0000000e+00	0.0000000e+00	0.0000000e+00	0.0000000e+00	0.0000000e+00	0.0000000e+00	0.0000000e+00	0.0000000e+00	0.0000000e+00	0.0000000e+00	0.0000000e+00	0.0000000e+00
12	0.0000000e+00	0.0000000e+00	0.0000000e+00	0.0000000e+00	0.0000000e+00	0.0000000e+00	0.0000000e+00	0.0000000e+00	0.0000000e+00	0.0000000e+00	0.0000000e+00	0.0000000e+00	0.0000000e+00	0.0000000e+00	0.0000000e+00	0.0000000e+00	0.0000000e+00	0.0000000e+00	0.0000000e+00	0.0000000e+00
13	0.0000000e+00	0.0000000e+00	0.0000000e+00	0.0000000e+00	0.0000000e+00	0.0000000e+00	0.0000000e+00	0.0000000e+00	0.0000000e+00	0.0000000e+00	0.0000000e+00	0.0000000e+00	0.0000000e+00	0.0000000e+00	0.0000000e+00	0.0000000e+00	0.0000000e+00	0.0000000e+00	0.0000000e+00	0.0000000e+00
14	0.0000000e+00	0.0000000e+00	0.0000000e+00	0.0000000e+00	0.0000000e+00	0.0000000e+00	0.0000000e+00	0.0000000e+00	0.0000000e+00	0.0000000e+00	0.0000000e+00	0.0000000e+00	0.0000000e+00	0.0000000e+00	0.0000000e+00	0.0000000e+00	0.0000000e+00	0.0000000e+00	0.0000000e+00	0.0000000e+00
15	0.0000000e+00	0.0000000e+00	0.0000000e+00	0.0000000e+00	0.0000000e+00	0.0000000e+00	0.0000000e+00	0.0000000e+00	0.0000000e+00	0.0000000e+00	0.0000000e+00	0.0000000e+00	0.0000000e+00	0.0000000e+00	0.0000000e+00	0.0000000e+00	0.0000000e+00	0.0000000e+00	0.0000000e+00	0.0000000e+00
16	0.0000000e+00	0.0000000e+00	0.0000000e+00	0.0000000e+00	0.0000000e+00	0.0000000e+00	0.0000000e+00	0.0000000e+00	0.0000000e+00	0.0000000e+00	0.0000000e+00	0.0000000e+00	0.0000000e+00	0.0000000e+00	0.0000000e+00	0.0000000e+00	0.0000000e+00	0.0000000e+00	0.0000000e+00	0.0000000e+00
17	0.0000000e+00	0.0000000e+00	0.0000000e+00	0.0000000e+00	0.0000000e+00	0.0000000e+00	0.0000000e+00	0.0000000e+00	0.0000000e+00	0.0000000e+00	0.0000000e+00	0.0000000e+00	0.0000000e+00	0.0000000e+00	0.0000000e+00	0.0000000e+00	0.0000000e+00	0.0000000e+00	0.0000000e+00	0.0000000e+00
18	0.0000000e+00	0.0000000e+00	0.0000000e+00	0.0000000e+00	0.0000000e+00	0.0000000e+00	0.0000000e+00	0.0000000e+00	0.0000000e+00	0.0000000e+00	0.0000000e+00	0.0000000e+00	0.0000000e+00	0.0000000e+00	0.0000000e+00	0.0000000e+00	0.0000000e+00	0.0000000e+00	0.0000000e+00	0.0000000e+00
19	0.0000000e+00	0.0000000e+00	0.0000000e+00	0.0000000e+00	0.0000000e+00	0.0000000e+00	0.0000000e+00	0.0000000e+00	0.0000000e+00	0.0000000e+00	0.0000000e+00	0.0000000e+00	0.0000000e+00	0.0000000e+00	0.0000000e+00	0.0000000e+00	0.0000000e+00	0.0000000e+00	0.0000000e+00	0.0000000e+00
20	0.0000000e+00	0.0000000e+00	0.0000000e+00	0.0000000e+00	0.0000000e+00	0.0000000e+00	0.0000000e+00	0.0000000e+00	0.0000000e+00	0.0000000e+00	0.0000000e+00	0.0000000e+00	0.0000000e+00	0.0000000e+00	0.0000000e+00	0.0000000e+00	0.0000000e+00	0.0000000e+00	0.0000000e+00	0.0000000e+00
21	0.0000000e+00	0.0000000e+00	0.0000000e+00	0.0000000e+00	0.0000000e+00	0.0000000e+00	0.0000000e+00	0.0000000e+00	0.0000000e+00	0.0000000e+00	0.0000000e+00	0.0000000e+00	0.0000000e+00	0.0000000e+00	0.0000000e+00	0.0000000e+00	0.0000000e+00	0.0000000e+00	0.0000000e+00	0.0000000e+00
22	0.0000000e+00	0.0000000e+00	0.0000000e+00	0.0000000e+00	0.0000000e+00	0.0000000e+00	0.0000000e+00	0.0000000e+00	0.0000000e+00	0.0000000e+00	0.0000000e+00	0.0000000e+00	0.0000000e+00	0.0000000e+00	0.0000000e+00	0.0000000e+00	0.0000000e+00	0.0000000e+00	0.0000000e+00	0.0000000e+00
23	0.0000000e+00	0.0000000e+00	0.0000000e+00	0.0000000e+00	0.0000000e+00	0.0000000e+00	0.0000000e+00	0.0000000e+00	0.0000000e+00	0.0000000e+00	0.0000000e+00	0.0000000e+00	0.0000000e+00	0.0000000e+00	0.0000000e+00	0.0000000e+00	0.0000000e+00	0.0000000e+00	0.0000000e+00	0.0000000e+00
24	0.0000000e+00	0.0000000e+00	0.0000000e+00	0.0000000e+00	0.0000000e+00	0.0000000e+00	0.0000000e+00	0.0000000e+00	0.0000000e+00	0.0000000e+00	0.0000000e+00	0.0000000e+00	0.0000000e+00	0.0000000e+00	0.0000000e+00	0.0000000e+00	0.0000000e+00	0.0000000e+00	0.0000000e+00	0.0000000e+00
25	0.0000000e+00	0.0000000e+00	0.0000000e+00	0.0000000e+00	0.0000000e+00	0.0000000e+00	0.0000000e+00	0.0000000e+00	0.0000000e+00	0.0000000e+00	0.0000000e+00	0.0000000e+00	0.0000000e+00	0.0000000e+00	0.0000000e+00	0.0000000e+00	0.0000000e+00	0.0000000e+00	0.0000000e+00	0.0000000e+00
26	0.0000000e+00	0.0000000e+00	0.0000000e+00	0.0000000e+00	0.0000000e+00	0.0000000e+00	0.0000000e+00	0.0000000e+00	0.0000000e+00	0.0000000e+00	0.0000000e+00	0.0000000e+00	0.0000000e+00	0.0000000e+00	0.0000000e+00	0.0000000e+00	0.0000000e+00	0.0000000e+00	0.0000000e+00	0.0000000e+00
27	0.0000000e+00	0.0000000e+00	0.0000000e+00	0.0000000e+00	0.0000000e+00	0.0000000e+00	0.0000000e+00	0.0000000e+00	0.0000000e+00	0.0000000e+00	0.0000000e+00	0.0000000e+00	0.0000000e+00	0.0000000e+00	0.0000000e+00	0.0000000e+00	0.0000000e+00	0.0000000e+00	0.0000000e+00	0.0000000e+00
28	0.0000000e+00	0.0000000e+00	0.0000000e+00	0.0000000e+00	0.0000000e+00	0.0000000e+00	0.0000000e+00	0.0000000e+00	0.0000000e+00	0.0000000e+00	0.0000000e+00	0.0000000e+00	0.0000000e+00	0.0000000e+00	0.0000000e+00	0.0000000e+00	0.0000000e+00	0.0000000e+00	0.0000000e+00	0.0000000e+00
29	0.0000000e+00	0.0000000e+00	0.0000000e+00	0.0000000e+00	0.0000000e+00	0.0000000e+00	0.0000000e+00	0.0000000e+00	0.0000000e+00	0.0000000e+00	0.0000000e+00	0.0000000e+00	0.0000000e+00	0.0000000e+00	0.0000000e+00	0.0000000e+00	0.0000000e+00	0.0000000e+00	0.0000000e+00	0.0000000e+00
30	0.0000000e+00	0.0000000e+00	0.0000000e+00	0.0000000e+00	0.0000000e+00	0.0000000e+00	0.0000000e+00	0.0000000e+00	0.0000000e+00	0.0000000e+00	0.0000000e+00	0.0000000e+00	0.0000000e+00	0.0000000e+00	0.0000000e+00	0.0000000e+00	0.0000000e+00	0.0000000e+00	0.0000000e+00	0.0000000e+00
31	0.0000000e+00	0.0000000e+00	0.0000000e+00	0.0000000e+00	0.0000000e+00	0.0000000e+00	0.0000000e+00	0.0000000e+00	0.0000000e+00	0.0000000e+00	0.0000000e+00	0.0000000e+00	0.0000000e+00	0.0000000e+00	0.0000000e+00	0.0000000e+00	0.0000000e+00	0.0000000e+00	0.0000000e+00	0.0000000e+00
32	0.0000000e+00	0.0000000e+00	0.0000000e+00	0.0000000e+00	0.0000000e+00	0.0000000e+00	0.0000000e+00	0.0000000e+00	0.0000000e+00	0.0000000e+00	0.0000000e+00	0.0000000e+00	0.0000000e+00	0.0000000e+00	0.0000000e+00	0.0000000e+00	0.0000000e+00	0.0000000e+00	0.0000000e+00	0.0000000e+00
33	0.0000000e+00	0.0000000e+00	0.0000000e+00	0.0000000e+00	0.0000000e+00	0.0000000e+00	0.0000000e+00	0.0000000e+00	0.0000000e+00	0.0000000e+00	0.0000000e+00	0.0000000e+00	0.0000000e+00	0.0000000e+00	0.0000000e+00	0.0000000e+00	0.0000000e+00	0.0000000e+00	0.0000000e+00	0.0000000e+00
34	0.0000000e+00	0.0000000e+00	0.0000000e+00	0.0000000e+00	0.0000000e+00	0.0000000e+00	0.0000000e+00	0.0000000e+00	0.0000000e+00	0.0000000e+00	0.0000000e+00	0.0000000e+00	0.0000000e+00	0.0000000e+00	0.0000000e+00	0.0000000e+00	0.0000000e+00	0.0000000e+00	0.0000000e+00	0.0000000e+00
35	0.0000000e+00	0.0000000e+00	0.0000000e+00	0.0000000e+00	0.0000000e+00	0.0000000e+00	0.0000000e+00	0.0000000e+00	0.0000000e+00	0.0000000e+00	0.0000000e+00	0.0000000e+00	0.0000000e+00	0.0000000e+00	0.0000000e+00	0.0000000e+00	0.0000000e+00	0.0000000e+00	0.0000000e+00	0.0000000e+00
36	0.0000000e+00	0.0000000e+00	0.0000000e+00	0.0000000e+00	0.0000000e+00	0.0000000e+00	0.0000000e+00	0.0000000e+00	0.0000000e+00	0.0000000e+00	0.0000000e+00	0.0000000e+00	0.0000000e+00	0.0000000e+00	0.0000000e+00	0.0000000e+00	0.0000000e+00	0.0000000e+00	0.0000000e+00	0.0000000e+00
37	0.0000000e+00	0.0000000e+00	0.0000000e+00	0.0000000e+00	0.0000000e+00	0.0000000e+00	0.0000000e+00	0.0000000e+00	0.0000000e+00	0.0000000e+00	0.0000000e+00	0.0000000e+00	0.0000000e+00	0.0000000e+00	0.0000000e+00	0.0000000e+00	0.0000000e+00	0.0000000e+00	0.0000000e+00	0.0000000e+00
38	0.0000000e+00	0.0000000e+00	0.0000000e+00	0.0000000e+00	0.0000000e+00	0.0000000e+00	0.0000000e+00	0.0000000e+00	0.0000000e+00	0.0000000e+00	0.0000000e+00	0.0000000e+00	0.0000000e+00	0.0000000e+00	0.0000000e+00	0.0000000e+00	0.0000000e+00	0.0000000e+00	0.0000000e+00	0.0000000e+00
39	0.0000000e+00	0.0000000e+00	0.0000000e+00	0.0000000e+00	0.0000000e+00	0.0000000e+00	0.0000000e+00	0.0000000e+00	0.0000000e+00	0.0000000e+00	0.0000000e+00	0.0000000e+00	0.0000000e+00	0.0000000e+00	0.0000000e+00	0.0000000e+00	0.0000000e+00	0.0000000e+00	0.0000000e+00	0.0000000e+00
40	0.0000000e+00	0.0000000e+00	0.0000000e+00	0.0000000e+00	0.0000000e+00	0.0000000e+00	0.0000000e+00	0.0000000e+00	0.0000000e+00	0.0000000e+00	0.0000000e+00	0.0000000e+00	0.0000000e+00	0.0000000e+00	0.0000000e+00	0.0000000e+00	0.0000000e+00	0.0000000e+00	0.0000000e+00	0.0000000e+00
41	0.0000000e+00	0.0000000e+00	0.0000000e+00	0.0000000e+00	0.0000000e+00	0.0000000e+00	0.0000000e+00	0.0000000e+00	0.0000000e+00	0.0000000e+00	0.0000000e+00	0.0000000e+00	0.0000000e+00	0.0000000e+00	0.0000000e+00	0.0000000e+00	0.0000000e+00	0.0000000e+00	0.0000000e+00	0.0000000e+00
42	0.0000000e+00	0.0000000e+00	0.0000000e+00	0.0000000e+00	0.0000000e+00	0.0000000e+00	0.0000000e+00	0.0000000e+00	0.0000000e+00	0.0000000e+00	0.0000000e+00	0.0000000e+00	0.0000000e+00	0.0000000e+00	0.0000000e+00	0.0000000e+00	0.0000000e+00	0.0000000e+00	0.0000000e+00	0.0000000e+00
43	0.0000000e+00	0.0000000e+00	0.0000000e+00	0.0000000e+00	0.0000000e+00	0.0000000e+00	0.0000000e+00	0.0000000e+00	0.0000000e+00	0.0000000e+00	0.0000000e+00	0.0000000e+00	0.0000000e+00	0.0000000e+00	0.0000000e+00	0.0000000e+00	0.0000000e+00	0.0000000e+00	0.0000000e+00	0.0000000e+00
44	2.3478650e-05	2.3732408e-05	2.3938324e-05	2.4118347e-05	5.8717260e-06	5.9351877e-06	5.9866849e-06	6.0317064e-06	1.4679587e-06	1.4838244e-06	1.4966989e-06	1.5079545e-06	3.6698977e-07	3.7095620e-07	3.7417484e-07	3.7698873e-07	9.1747424e-08	9.2739033e-08	9.3543691e-08	9.4247165e-08
45	7.7204009e-05	7.8075599e-05	7.8770350e-05	7.9373576e-05	1.9313903e-05	1.9531948e-05	1.9705752e-05	1.9856660e-05	4.8286457e-06	4.8831588e-06	4.9266114e-06	4.9643396e-06	1.2071621e-06	1.2207904e-06	1.2316535e-06	1.2410856e-06	3.0179041e-07	3.0519747e-07	3.0791326e-07	3.1027128e-07
46	1.6983002e-04	1.7184417e-04	1.7341639e-04	1.7476991e-04	4.2502730e-05	4.3006814e-05	4.3400291e-05	4.3739035e-05	1.0626278e-05	1.0752307e-05	1.0850681e-05	1.0935372e-05	2.6565719e-06	2.6880790e-06	2.7126727e-06	2.7338454e-06	6.6414258e-07	6.7201935e-07	6.7816778e-07	6.8346095e-07
47	3.1265085e-04	3.1656991e-04	3.1955529e-04	3.2209806e-04	7.8285087e-05	7.9266426e-05	8.0013959e-05	8.0650655e-05	1.9572885e-05	1.9818241e-05	2.0005139e-05	2.0164327e-05	4.8932276e-06	4.9545665e-06	5.0012913e-06	5.0410882e-06	1.2233058e-06	1.2386405e-06	1.2503217e-06	1.2602709e-06
48	5.1992059e-04	5.2684493e-04	5.3198513e-04	5.3631035e-04	1.3026572e-04	1.3200075e-04	1.3328868e-04	1.3437240e-04	3.2570199e-05	3.3004007e-05	3.3326029e-05	3.3596989e-05	8.1425644e-06	8.2510168e-06	8.3315222e-06	8.3992625e-06	2.0356386e-06	2.0627516e-06	2.0828780e-06	2.0998130e-06
49	8.1003355e-04	8.2155780e-04	8.2988326e-04	8.3679322e-04	2.0311531e-04	2.0600541e-04	2.0809319e-04	2.0982595e-04	5.0786843e-05	5.1509487e-05	5.2031516e-05	5.2464776e-05	1.2696742e-05	1.2877404e-05	1.3007911e-05	1.3116226e-05	3.1741802e-06	3.2193454e-06	3.2519723e-06	3.2790511e-06
50	1.2064606e-03	1.2248740e-03	1.2378375e-03	1.2484171e-03	3.0282555e-04	3.0744842e-04	3.1070278e-04	3.1335855e-04	7.5722396e-05	7.6878371e-05	7.7692138e-05	7.8356224e-05	1.8930661e-05	1.9219656e-05	1.9423099e-05	1.9589121e-05	4.7326546e-06	4.8049032e-06	4.8557637e-06	4.8972690e-06
51	1.7388539e-03	1.7674380e-03	1.7870942e-03	1.8028137e-03	4.3701961e-04	4.4420611e-04	4.4914740e-04	4.5309870e-04	1.0928545e-04	1.1108261e-04	1.1231830e-04	1.1330641e-04	2.7321482e-05	2.7770775e-05	2.8079697e-05	2.8326726e-05	6.8303501e-06	6.9426728e-06	7.0199032e-06	7.0816601e-06
52	2.4448107e-03	2.4882472e-03	2.5175173e-03	2.5403690e-03	6.1545041e-04	6.2639085e-04	6.3376207e-04	6.3951604e-04	1.5391900e-04	1.5665519e-04	1.5849870e-04	1.5993774e-04	3.8479970e-05	3.9164021e-05	3.9624903e-05	3.9984665e-05	9.6199545e-06	9.7909667e-06	9.9061868e-06	9.9961267e-06
53	3.3708714e-03	3.4357616e-03	3.4787701e-03	3.5114723e-03	8.5033688e-04	8.6671882e-04	8.7757465e-04	8.8582711e-04	2.1268565e-04	2.1678326e-04	2.1949860e-04	2.2156274e-04	5.3171810e-05	5.4196220e-05	5.4875060e-05	5.5391099e-05	1.3292884e-05	1.3548985e-05	1.3718694e-05	1.3847703e-05
54	4.5745848e-03	4.6701500e-03	4.7327304e-03	4.7789854e-03	1.1570212e-03	1.1812186e-03	1.1970610e-03	1.2087665e-03	2.8943400e-04	2.9548744e-04	2.9945068e-04	3.0237894e-04	7.2359200e-05	7.3872574e-05	7.4863394e-05	7.5595467e-05	1.8089680e-05	1.8468021e-05	1.8715724e-05	1.8898741e-05
55	6.1249971e-03	6.2640049e-03	6.3542835e-03	6.4191861e-03	1.5542915e-03	1.5896204e-03	1.6125601e-03	1.6290437e-03	3.8888211e-04	3.9772209e-04	4.0346197e-04	4.0758635e-04	9.7221737e-05	9.9431763e-05	1.0086675e-04	1.0189786e-04	2.4305227e-05	2.4857728e-05	2.5216472e-05	2.5474246e-05
56	8.1042725e-03	8.3041240e-03	8.4333768e-03	8.5239255e-03	2.0650929e-03	2.1161240e-03	2.1491220e-03	2.1722242e-03	5.1679992e-04	5.2957214e-04	5.3783087e-04	5.4361272e-04	1.2920204e-04	1.3239515e-04	1.3445987e-04	1.3590536e-04	3.2300156e-05	3.3098424e-05	3.3614598e-05	3.3975965e-05
57	1.0606631e-02	1.0890697e-02	1.1074368e-02	1.1200141e-02	2.7166599e-03	2.7896190e-03	2.8367864e-03	2.8690605e-03	6.8004846e-04	6.9831468e-04	7.1012352e-04	7.1820336e-04	1.7001557e-04	1.7458223e-04	1.7753451e-04	1.7955451e-04	4.2503299e-05	4.3644946e-05	4.4383003e-05	4.4887997e-05
58	1.3735094e-02	1.4134237e-02	1.4393049e-02	1.4566941e-02	3.5401745e-03	3.6434254e-03	3.7103724e-03	3.7553130e-03	8.8650226e-04	9.1236258e-04	9.2913017e-04	9.4038547e-04	2.2163127e-04	2.2809654e-04	2.3228856e-04	2.3510246e-04	5.5406837e-05	5.7023122e-05	5.8071106e-05	5.8774568e-05
59	1.7597311e-02	1.8151395e-02	1.8512579e-02	1.8751789e-02	4.5702486e-03	4.7148234e-03	4.8090736e-03	4.8714347e-03	1.1449296e-03	1.1811574e-03	1.2047749e-03	1.2204007e-03	2.8624169e-04	2.9529896e-04	3.0120354e-04	3.0511013e-04	7.1558827e-05	7.3823089e-05	7.5299197e-05	7.6275820e-05
60	2.2300443e-02	2.3059463e-02	2.3558171e-02	2.3885064e-02	5.8441655e-03	6.0442503e-03	6.1757511e-03	6.2618624e-03	1.4648141e-03	1.5149805e-03	1.5479517e-03	1.5695413e-03	3.6621830e-04	3.7876049e-04	3.8700367e-04	3.9240130e-04	9.1552034e-05	9.4687483e-05	9.6748213e-05	9.8097579e-05
61	2.7940424e-02	2.8965519e-02	2.9645782e-02	3.0088971e-02	7.3993621e-03	7.6728156e-03	7.8543791e-03	7.9725588e-03	1.8557320e-03	1.9243406e-03	1.9698957e-03	1.9995460e-03	4.6395610e-04	4.8110922e-04	4.9249864e-04	4.9991163e-04	1.1598505e-04	1.2027317e-04	1.2312041e-04	1.2497359e-04
62	3.4591303e-02	3.5955178e-02	3.6870673e-02	3.7465864e-02	9.2704537e-03	9.6392163e-03	9.8869575e-03	1.0047900e-02	2.3266107e-03	2.4192048e-03	2.4814142e-03	2.5218261e-03	5.8168800e-04	6.0483811e-04	6.2039152e-04	6.3049521e-04	1.4541593e-04	1.5120318e-04	1.5509135e-04	1.5761716e-04
63	4.2301212e-02	4.4088437e-02	4.5303101e-02	4.6093643e-02	1.1487708e-02	1.1978220e-02	1.2311998e-02	1.2529120e-02	2.8853454e-03	3.0086195e-03	3.0925096e-03	3.1470786e-03	7.2138907e-04	7.5221015e-04	7.7318443e-04	7.8682780e-04	1.8033821e-04	1.8804304e-04	1.9328631e-04	1.9669695e-04
64	5.1083639e-02	5.3389551e-02	5.4977353e-02	5.6014429e-02	1.4073338e-02	1.4716556e-02	1.5160189e-02	1.5449894e-02	3.5378534e-03	3.6996645e-03	3.8112776e-03	3.8841633e-03	8.8454015e-04	9.2499687e-04	9.5290292e-04	9.7112616e-04	2.2112184e-04	2.3123534e-04	2.3821137e-04	2.4276687e-04
65	6.0918798e-02	6.3848513e-02	6.5892056e-02	6.7234963e-02	1.7040413e-02	1.7871821e-02	1.8452942e-02	1.8834910e-02	4.2877815e-03	4.4971574e-03	4.6435206e-03	4.7397259e-03	1.0720544e-03	1.1244044e-03	1.1609994e-03	1.1850536e-03	2.6799486e-04	2.8108132e-04	2.9022936e-04	2.9624241e-04
66	7.1754198e-02	7.5420748e-02	7.8010228e-02	7.9725652e-02	2.0391162e-02	2.1450429e-02	2.2200377e-02	2.2697542e-02	5.1360481e-03	5.4031083e-03	5.5922111e-03	5.7175795e-03	1.2841629e-03	1.3509368e-03	1.3982189e-03	1.4295652e-03	3.2101480e-04	3.3770674e-04	3.4952617e-04	3.5736202e-04
67	8.3509002e-02	8.8032074e-02	9.1263945e-02	9.3425414e-02	2.4116539e-02	2.5447258e-02	2.6400795e-02	2.7039322e-02	6.0807018e-03	6.4165948e-03	6.6573222e-03	6.8185361e-03	1.5203791e-03	1.6043650e-03	1.6645561e-03	1.7048659e-03	3.8005977e-04	4.0105407e-04	4.1610026e-04	4.2617662e-04
68	9.6086387e-02	1.0159143e-01	1.0556784e-01	1.0825546e-01	2.8199294e-02	2.9848772e-02	3.1043995e-02	3.1853315e-02	7.1176789e-03	7.5345332e-03	7.8366465e-03	8.0412401e-03	1.7796880e-03	1.8839193e-03	1.9594607e-03	2.0106181e-03	4.4487589e-04	4.7093067e-04	4.8981377e-04	5.0260157e-04
69	1.0938090e-01	1.1600039e-01	1.2082779e-01	1.2412760e-01	3.2615965e-02	3.4635681e-02	3.6113617e-02	3.7126318e-02	8.2412951e-03	8.7523394e-03	9.1263759e-03	9.3827102e-03	2.0606694e-03	2.1884547e-03	2.2819818e-03	2.3460779e-03	5.1510794e-04	5.4705010e-04	5.7042879e-04	5.8645066e-04
70	1.2327743e-01	1.3115182e-01	1.3694022e-01	1.4094211e-01	3.7335660e-02	3.9781581e-02	4.1585900e-02	4.2837051e-02	9.4439121e-03	1.0063557e-02	1.0520758e-02	1.0837852e-02	2.3614140e-03	2.5163575e-03	2.6306822e-03	2.7099727e-03	5.9027856e-04	6.2900888e-04	6.5758588e-04	6.7740555e-04
71	1.3766293e-01	1.4694262e-01	1.5380483e-01	1.5860234e-01	4.2324942e-02	4.5258259e-02	4.7435006e-02	4.8962098e-02	1.0717188e-02	1.1461217e-02	1.2013463e-02	1.2400977e-02	2.6798364e-03	2.8658863e-03	3.0039798e-03	3.1008811e-03	6.6986637e-04	7.1637153e-04	7.5088941e-04	7.7511081e-04
72	1.5242707e-01	1.6327439e-01	1.7132662e-01	1.7701665e-01	4.7548513e-02	5.1036458e-02	5.3634238e-02	5.5477103e-02	1.2052256e-02	1.2938040e-02	1.3597895e-02	1.4066117e-02	3.0137200e-03	3.2352209e-03	3.4002262e-03	3.5173114e-03	7.5331723e-04	8.0868301e-04	8.4992723e-04	8.7919339e-04
73	1.6745979e-01	1.8004943e-01	1.8941137e-01	1.9609442e-01	5.2968114e-02	5.7084201e-02	6.0154154e-02	6.2355028e-02	1.3439432e-02	1.4485992e-02	1.5266703e-02	1.5826559e-02	3.3606432e-03	3.6223531e-03	3.8175835e-03	3.9575857e-03	8.4002583e-04	9.0544130e-04	9.5423986e-04	9.8923381e-04
74	1.8265663e-01	1.9717467e-01	2.0797218e-01	2.1575143e-01	5.8545271e-02	6.3369073e-02	6.6965872e-02	6.9569043e-02	1.4868930e-02	1.6096887e-02	1.7012636e-02	1.7675605e-02	3.7181589e-03	4.0252359e-03	4.2542390e-03	4.4200299e-03	9.2938050e-04	1.0061347e-03	1.0633741e-03	1.1048135e-03
75	1.9792442e-01	2.1456808e-01	2.2693627e-01	2.3591833e-01	6.4244900e-02	6.9862216e-02	7.4045367e-02	7.7097562e-02	1.6331814e-02	1.7763437e-02	1.8829680e-02	1.9607898e-02	4.0840322e-03	4.4420468e-03	4.7086894e-03	4.9033042e-03	1.0208226e-03	1.1103076e-03	1.1769542e-03	1.2255975e-03
76	2.1317170e-01	2.3214748e-01	2.4623298e-01	2.5652727e-01	7.0030587e-02	7.6532844e-02	8.1367641e-02	8.4917769e-02	1.7818761e-02	1.9477818e-02	2.0711537e-02	2.1617725e-02	4.4559318e-03	4.8708298e-03	5.1793596e-03	5.4059812e-03	1.1137696e-03	1.2174710e-03	1.2945863e-03	1.3512289e-03
77	2.2830945e-01	2.4983372e-01	2.6579710e-01	2.7751694e-01	7.5865866e-02	8.3350510e-02	8.8909191e-02	9.3008839e-02	1.9320411e-02	2.1232275e-02	2.2652278e-02	2.3699880e-02	4.8315165e-03	5.3096453e-03	5.6647675e-03	5.9267587e-03	1.2076361e-03	1.3271403e-03	1.4159000e-03	1.4813822e-03
78	2.4324895e-01	2.6754868e-01	2.8556525e-01	2.9882848e-01	8.1713079e-02	9.0284017e-02	9.6646305e-02	1.0135002e-01	2.0827063e-02	2.3018832e-02	2.4645901e-02	2.5849153e-02	5.2083600e-03	5.7564987e-03	6.1634122e-03	6.4643347e-03	1.3018159e-03	1.4388169e-03	1.5405201e-03	1.6157319e-03
79	2.5790253e-01	2.8521547e-01	3.0547388e-01	3.2040600e-01	8.7533581e-02	9.7301387e-02	1.0455415e-01	1.0992076e-01	2.2328726e-02	2.4829282e-02	2.6686088e-02	2.8060364e-02	5.5839636e-03	6.2093375e-03	6.6737141e-03	7.0174140e-03	1.3956846e-03	1.5519876e-03	1.6680517e-03	1.7539542e-03
80	2.7219123e-01	3.0276585e-01	3.2546767e-01	3.4220529e-01	9.3292362e-02	1.0437473e-01	1.1261225e-01	1.1870654e-01	2.3816348e-02	2.6656484e-02	2.8767677e-02	3.0329928e-02	5.9560626e-03	6.6663757e-03	7.1943821e-03	7.5851000e-03	1.4886760e-03	1.6662063e-03	1.7981722e-03	1.8958250e-03
81	2.8603198e-01	3.2012567e-01	3.4548273e-01	3.6417560e-01	9.8950264e-02	1.1147117e-01	1.2079412e-01	1.2768769e-01	2.5279743e-02	2.8491952e-02	3.0883887e-02	3.2652868e-02	6.3221091e-03	7.1254910e-03	7.7237207e-03	8.1661491e-03	1.5801537e-03	1.7809425e-03	1.9304576e-03	2.0410333e-03
82	2.9934234e-01	3.3721846e-01	3.6545314e-01	3.8626643e-01	1.0446725e-01	1.1855593e-01	1.2907162e-01	1.3684407e-01	2.6708464e-02	3.0326677e-02	3.3027493e-02	3.5024076e-02	6.6794898e-03	7.5844293e-03	8.2599226e-03	8.7592837e-03	1.6694644e-03	1.8956329e-03	2.0644565e-03	2.1892597e-03
83	3.1204414e-01	3.5396944e-01	3.8531611e-01	4.0843155e-01	1.0980467e-01	1.2559486e-01	1.3741824e-01	1.4615808e-01	2.8092412e-02	3.2151809e-02	3.5191698e-02	3.7439118e-02	7.0256779e-03	8.0409776e-03	8.8012884e-03	9.3633948e-03	1.7559769e-03	2.0097244e-03	2.1997439e-03	2.3402272e-03
84	3.2406524e-01	3.7030567e-01	4.0501156e-01	4.3062627e-01	1.1492579e-01	1.3255428e-01	1.4580872e-01	1.5561327e-01	2.9421959e-02	3.3958615e-02	3.7370037e-02	3.9893877e-02	7.3582644e-03	8.4929508e-03	9.3462006e-03	9.9774539e-03	1.8390891e-03	2.1226709e-03	2.3359156e-03	2.4936785e-03
85	3.3533572e-01	3.8614869e-01	4.2447107e-01	4.5279496e-01	1.1979218e-01	1.3939499e-01	1.5421097e-01	1.6518530e-01	3.0686966e-02	3.5736847e-02	3.9554186e-02	4.2382108e-02	7.6747129e-03	8.9377853e-03	9.8925777e-03	1.0599899e-02	1.9181674e-03	2.2338320e-03	2.4724515e-03	2.6492232e-03
86	3.4579544e-01	4.0142300e-01	4.4362893e-01	4.7488309e-01	1.2436906e-01	1.4607860e-01	1.6259391e-01	1.7485044e-01	3.1878227e-02	3.7476443e-02	4.1736081e-02	4.4897732e-02	7.9727197e-03	9.3729638e-03	1.0438402e-02	1.1229209e-02	1.9926362e-03	2.3425786e-03	2.6088473e-03	2.8064812e-03
87	3.5539344e-01	4.1605201e-01	4.6241509e-01	4.9683196e-01	1.2862471e-01	1.5256494e-01	1.7092349e-01	1.8458233e-01	3.2987294e-02	3.9166851e-02	4.3906857e-02	4.7433964e-02	8.2501703e-03	9.7958465e-03	1.0981456e-02	1.1863688e-02	2.0619672e-03	2.4482510e-03	2.7445489e-03	2.9650286e-03
88	3.6409010e-01	4.2995924e-01	4.8075578e-01	5.1857997e-01	1.3253156e-01	1.5881258e-01	1.7916280e-01	1.9435234e-01	3.4006769e-02	4.0797143e-02	4.6056865e-02	4.9983400e-02	8.5052136e-03	1.0203698e-02	1.1519326e-02	1.2501483e-02	2.1256981e-03	2.5501661e-03	2.8789531e-03	3.1244024e-03
89	3.7185982e-01	4.4307304e-01	4.9857695e-01	5.4006571e-01	1.3606786e-01	1.6478117e-01	1.8727390e-01	2.0413132e-01	3.4930747e-02	4.2356641e-02	4.8176166e-02	5.2538492e-02	8.7363711e-03	1.0593848e-02	1.2049525e-02	1.3140707e-02	2.1834594e-03	2.6476562e-03	3.0114386e-03	3.2841309e-03
90	3.7869246e-01	4.5532747e-01	5.1580313e-01	5.6122411e-01	1.3921805e-01	1.7043107e-01	1.9521601e-01	2.1388638e-01	3.5754913e-02	4.3834792e-02	5.0254016e-02	5.5090655e-02	8.9425624e-03	1.0963654e-02	1.2569366e-02	1.3779211e-02	2.2349815e-03	2.7400616e-03	3.1413338e-03	3.4436773e-03
91	3.8459731e-01	4.6666658e-01	5.3236160e-01	5.8199263e-01	1.4197579e-01	1.7572679e-01	2.0294934e-01	2.2358594e-01	3.6477358e-02	4.5222110e-02	5.2279913e-02	5.7631643e-02	9.1233090e-03	1.1310744e-02	1.3076219e-02	1.4414934e-02	2.2801449e-03	2.8267892e-03	3.2679819e-03	3.6025262e-03
92	3.8960329e-01	4.7704321e-01	5.4817736e-01	6.0230280e-01	1.4434400e-01	1.8063573e-01	2.1043141e-01	2.3319420e-01	3.7098587e-02	4.6509820e-02	5.4242605e-02	6.0152077e-02	9.2787358e-03	1.1632919e-02	1.3567270e-02	1.5045528e-02	2.3189810e-03	2.9072905e-03	3.3906797e-03	3.7600912e-03
93	3.9375811e-01	4.8642032e-01	5.6317276e-01	6.2207854e-01	1.4633463e-01	1.8512842e-01	2.1761589e-01	2.4266900e-01	3.7621463e-02	4.7689914e-02	5.6129751e-02	6.2640821e-02	9.4095586e-03	1.1928176e-02	1.4039430e-02	1.5668207e-02	2.3516689e-03	2.9810646e-03	3.5086555e-03	3.9156762e-03
94	3.9712824e-01	4.9477761e-01	5.7727825e-01	6.4124739e-01	1.4796998e-01	1.8918379e-01	2.2446057e-01	2.5197067e-01	3.8051605e-02	4.8756583e-02	5.7930083e-02	6.5087407e-02	9.5171815e-03	1.2195061e-02	1.4489880e-02	1.6280352e-02	2.3785596e-03	3.0477484e-03	3.6212049e-03	4.0686267e-03
95	3.9979438e-01	5.0211098e-01	5.9043075e-01	6.5973597e-01	1.4928027e-01	1.9278780e-01	2.3092441e-01	2.6105696e-01	3.8396720e-02	4.9705840e-02	5.9632586e-02	6.7480632e-02	9.6035326e-03	1.2432574e-02	1.4915862e-02	1.6879159e-02	2.4001349e-03	3.1070924e-03	3.7276392e-03	4.2182424e-03
96	4.0184719e-01	5.0843459e-01	6.0257402e-01	6.7746876e-01	1.5030190e-01	1.9593488e-01	2.3696777e-01	2.6988206e-01	3.8666176e-02	5.0535890e-02	6.1226537e-02	6.9808275e-02	9.6709545e-03	1.2640265e-02	1.5314693e-02	1.7461571e-02	2.4169804e-03	3.1589845e-03	3.8272879e-03	4.3637592e-03
97	4.0338474e-01	5.1378418e-01	6.1366289e-01	6.9437011e-01	1.5107673e-01	1.9863077e-01	2.4255592e-01	2.7839936e-01	3.8870825e-02	5.1247927e-02	6.2702480e-02	7.2057866e-02	9.7221621e-03	1.2818431e-02	1.5684005e-02	1.8024465e-02	2.4297746e-03	3.2034991e-03	3.9195598e-03	4.5043974e-03
98	4.0450512e-01	5.1821596e-01	6.2366509e-01	7.1036512e-01	1.5164845e-01	2.0089224e-01	2.4765990e-01	2.8656139e-01	3.9022041e-02	5.1846073e-02	6.4052451e-02	7.4216670e-02	9.7600002e-03	1.2968104e-02	1.6021803e-02	1.8564655e-02	2.4392282e-03	3.2408938e-03	4.0039568e-03	4.6393609e-03
99	4.0529984e-01	5.2180413e-01	6.3256305e-01	7.2538317e-01	1.5205908e-01	2.0274627e-01	2.5225753e-01	2.9432130e-01	3.9130806e-02	5.2337152e-02	6.5270234e-02	7.6272053e-02	9.7872167e-03	1.3090988e-02	1.6326532e-02	1.9078979e-02	2.4460280e-03	3.2715952e-03	4.0800904e-03	4.7678597e-03
100	4.0584944e-01	5.2463750e-01	6.4035640e-01	7.3936063e-01	1.5234660e-01	2.0422854e-01	2.5633458e-01	3.0163354e-01	3.9207072e-02	5.2730329e-02	6.6351686e-02	7.8211650e-02	9.8063014e-03	1.3189375e-02	1.6597153e-02	1.9564341e-02	2.4507960e-03	3.2961760e-03	4.1477013e-03	4.8891206e-03
101	4.0622033e-01	5.2681544e-01	6.4706547e-01	7.5224409e-01	1.5254305e-01	2.0538209e-01	2.5988808e-01	3.0845735e-01	3.9259256e-02	5.3036759e-02	6.7295634e-02	8.0024322e-02	9.8193602e-03	1.3266058e-02	1.6833371e-02	2.0017953e-02	2.4540585e-03	3.3153338e-03	4.2067161e-03	5.0024472e-03
102	4.0646455e-01	5.2844404e-01	6.5273185e-01	7.6398963e-01	1.5267399e-01	2.0625534e-01	2.6292636e-01	3.1475524e-01	3.9294091e-02	5.3269067e-02	6.8103905e-02	8.1699742e-02	9.8280778e-03	1.3324193e-02	1.7035642e-02	2.0437228e-02	2.4562364e-03	3.3298576e-03	4.2572488e-03	5.1071937e-03
103	4.0662089e-01	5.2962891e-01	6.5741873e-01	7.7456757e-01	1.5275886e-01	2.0689851e-01	2.6547048e-01	3.2049713e-01	3.9316701e-02	5.3440423e-02	6.8781719e-02	8.3229518e-02	9.8337361e-03	1.3367076e-02	1.7205269e-02	2.0820065e-02	2.4576500e-03	3.3405708e-03	4.2996258e-03	5.2028354e-03
104	4.0671803e-01	5.3046804e-01	6.6120741e-01	7.8396278e-01	1.5281224e-01	2.0735958e-01	2.6755222e-01	3.2565945e-01	3.9330944e-02	5.3563446e-02	6.9337173e-02	8.4606939e-02	9.8373005e-03	1.3397864e-02	1.7344279e-02	2.1164782e-02	2.4585405e-03	3.3482622e-03	4.3343531e-03	5.2889525e-03
105	4.0677637e-01	5.3104751e-01	6.6419481e-01	7.9217977e-01	1.5284468e-01	2.0768187e-01	2.6921375e-01	3.3022955e-01	3.9339614e-02	5.3649571e-02	6.9781174e-02	8.5828183e-02	9.8394703e-03	1.3419419e-02	1.7455399e-02	2.1470422e-02	2.4590825e-03	3.3536468e-03	4.3621125e-03	5.3653060e-03
106	4.0681031e-01	5.3143805e-01	6.6648806e-01	7.9924407e-01	1.5286379e-01	2.0790174e-01	2.7050486e-01	3.3420678e-01	3.9344728e-02	5.3708416e-02	7.0126721e-02	8.6892632e-02	9.8407503e-03	1.3434146e-02	1.7541881e-02	2.1736828e-02	2.4594023e-03	3.3573259e-03	4.3837166e-03	5.4318570e-03
107	4.0682922e-01	5.3169485e-01	6.6820062e-01	8.0520258e-01	1.5287456e-01	2.0804807e-01	2.7148072e-01	3.3760209e-01	3.9347616e-02	5.3747641e-02	7.0388299e-02	8.7802739e-02	9.8414731e-03	1.3443964e-02	1.7607349e-02	2.1964612e-02	2.4595828e-03	3.3597783e-03	4.4000710e-03	5.4887587e-03
108	4.0683955e-01	5.3185905e-01	6.6944500e-01	8.1012484e-01	1.5288053e-01	2.0814277e-01	2.7219840e-01	3.4044097e-01	3.9349216e-02	5.3773064e-02	7.0580974e-02	8.8564884e-02	9.8418736e-03	1.3450327e-02	1.7655574e-02	2.2155368e-02	2.4596829e-03	3.3613679e-03	4.4121175e-03	5.5364099e-03
109	4.0684477e-01	5.3196095e-01	6.7032520e-01	8.1409898e-01	1.5288357e-01	2.0820225e-01	2.7271217e-01	3.4276063e-01	3.9350035e-02	5.3789057e-02	7.0719119e-02	8.9188616e-02	9.8420785e-03	1.3454330e-02	1.7690151e-02	2.2311486e-02	2.4597341e-03	3.3623678e-03	4.4207548e-03	5.5754076e-03
110	4.0684720e-01	5.3202206e-01	6.7093233e-01	8.1722892e-01	1.5288500e-01	2.0823835e-01	2.7307079e-01	3.4460946e-01	3.9350421e-02	5.3798780e-02	7.0815703e-02	8.9686537e-02	9.8421752e-03	1.3456763e-02	1.7714326e-02	2.2436116e-02	2.4597582e-03	3.3629757e-03	4.4267936e-03	5.6065394e-03
111	4.0684842e-01	5.3205758e-01	6.7134098e-01	8.1962856e-01	1.5288574e-01	2.0825958e-01	2.7331505e-01	3.4604377e-01	3.9350619e-02	5.3804506e-02	7.0881591e-02	9.0073437e-02	9.8422247e-03	1.3458197e-02	1.7730818e-02	2.2532961e-02	2.4597706e-03	3.3633338e-03	4.4309131e-03	5.6307300e-03
112	4.0684883e-01	5.3207734e-01	6.7160939e-01	8.2141852e-01	1.5288598e-01	2.0827153e-01	2.7347738e-01	3.4712633e-01	3.9350686e-02	5.3807735e-02	7.0925451e-02	9.0365926e-02	9.8422415e-03	1.3459005e-02	1.7741797e-02	2.2606175e-02	2.4597748e-03	3.3635356e-03	4.4336554e-03	5.6490177e-03
113	4.0684925e-01	5.3208813e-01	6.7178082e-01	8.2271770e-01	1.5288624e-01	2.0827814e-01	2.7358229e-01	3.4792138e-01	3.9350755e-02	5.3809522e-02	7.0953840e-02	9.0581084e-02	9.8422587e-03	1.3459452e-02	1.7748903e-02	2.2660034e-02	2.4597791e-03	3.3636474e-03	4.4354305e-03	5.6624705e-03
114	4.0684925e-01	5.3209357e-01	6.7188710e-01	8.2363572e-01	1.5288624e-01	2.0828150e-01	2.7364810e-01	3.4848982e-01	3.9350755e-02	5.3810435e-02	7.0971679e-02	9.0735170e-02	9.8422587e-03	1.3459681e-02	1.7753369e-02	2.2698607e-02	2.4597791e-03	3.3637045e-03	4.4365459e-03	5.6721049e-03
115	4.0684925e-01	5.3209610e-01	6.7195077e-01	8.2426828e-01	1.5288624e-01	2.0828309e-01	2.7368799e-01	3.4888610e-01	3.9350755e-02	5.3810866e-02	7.0982510e-02	9.0842767e-02	9.8422587e-03	1.3459789e-02	1.7756081e-02	2.2725542e-02	2.4597791e-03	3.3637314e-03	4.4372231e-03	5.6788325e-03
116	4.0684925e-01	5.3209738e-01	6.7198774e-01	8.2469365e-01	1.5288624e-01	2.0828390e-01	2.7371142e-01	3.4915569e-01	3.9350755e-02	5.3811086e-02	7.0988883e-02	9.0916090e-02	9.8422587e-03	1.3459844e-02	1.7757676e-02	2.2743898e-02	2.4597791e-03	3.3637451e-03	4.4376216e-03	5.6834172e-03
117	4.0684925e-01	5.3209781e-01	6.7200829e-01	8.2497280e-01	1.5288624e-01	2.0828417e-01	2.7372460e-01	3.4933468e-01	3.9350755e-02	5.3811160e-02	7.0992473e-02	9.0964852e-02	9.8422587e-03	1.3459862e-02	1.7758575e-02	2.2756106e-02	2.4597791e-03	3.3637498e-03	4.4378461e-03	5.6864661e-03
118	4.0684925e-01	5.3209824e-01	6.7201951e-01	8.2515092e-01	1.5288624e-01	2.0828445e-01	2.7373187e-01	3.4945021e-01	3.9350755e-02	5.3811237e-02	7.0994458e-02	9.0996382e-02	9.8422587e-03	1.3459882e-02	1.7759072e-02	2.2764000e-02	2.4597791e-03	3.3637546e-03	4.4379702e-03	5.6884376e-03
119	4.0684925e-01	5.3209824e-01	6.7202516e-01	8.2526125e-01	1.5288624e-01	2.0828445e-01	2.7373558e-01	3.4952261e-01	3.9350755e-02	5.3811237e-02	7.0995471e-02	9.1016174e-02	9.8422587e-03	1.3459882e-02	1.7759325e-02	2.2768955e-02	2.4597791e-03	3.3637546e-03	4.4380335e-03	5.6896752e-03
120	4.0684925e-01	5.3209824e-01	6.7202778e-01	8.2532730e-01	1.5288624e-01	2.0828445e-01	2.7373732e-01	3.4956645e-01	3.9350755e-02	5.3811237e-02	7.0995948e-02	9.1028178e-02	9.8422587e-03	1.3459882e-02	1.7759445e-02	2.2771960e-02	2.4597791e-03	3.3637546e-03	4.4380634e-03	5.6904258e-03
