# Supplementary material for: Quantifying the Potential for Future Gene Therapy to Lower Lifetime Risk of Polygenic Late-Onset Diseases
Source: MDPI journal article supplement (doi:10.3390/ijms20133352), 2019-07-08
Supplement: s2 [file s2 › SuppFiles/Results/LODsCommonLow/Stroke/-1.000/FrailtyAnalysis.csv]

Age	Heritability	MeanOR	CaseOR	nControls	nCases	nCumIncidence	nIncidence	nLifeIncidence0	nAbsIncidence0	nLifeIncidence5	nAbsIncidence5	nLifeIncidence10	nAbsIncidence10	nLifeIncidence15	nAbsIncidence15	nIncActDivExp
39	0.19536	0.541374	0.825722	999992744	7256	7.256e-06	7.256e-06	7.04579e-06	7.04579e-06	7.09281e-06	7.09281e-06	7.13141e-06	7.13141e-06	7.1649e-06	7.1649e-06	0.211627
40	0.195361	0.541371	0.822056	999977184	15560	2.2816e-05	1.55601e-05	2.21317e-05	1.50859e-05	2.22844e-05	1.51916e-05	2.24088e-05	1.52774e-05	2.25159e-05	1.5351e-05	0.213246
41	0.195363	0.541365	0.823496	999952234	24950	4.7766e-05	2.49506e-05	4.62822e-05	2.41505e-05	4.6613e-05	2.43286e-05	4.68799e-05	2.44711e-05	4.71082e-05	2.45923e-05	0.214076
42	0.195366	0.541357	0.826997	999916942	35292	8.3058e-05	3.52937e-05	8.03843e-05	3.41021e-05	8.09808e-05	3.43677e-05	8.14568e-05	3.4577e-05	8.18618e-05	3.47536e-05	0.213073
43	0.19537	0.541346	0.826817	999869657	47285	0.000130343	4.72889e-05	0.000125991	4.56064e-05	0.000126963	4.59825e-05	0.000127732	4.62752e-05	0.000128381	4.65187e-05	0.214051
44	0.195375	0.541332	0.822526	999808759	60898	0.000191241	6.09059e-05	0.00018461	5.86198e-05	0.000186097	5.91338e-05	0.00018726	5.95284e-05	0.000188233	5.98524e-05	0.215095
45	0.195382	0.541315	0.823956	999732341	76418	0.000267659	7.64326e-05	0.000258011	7.3401e-05	0.000260187	7.40895e-05	0.000261869	7.46088e-05	0.000263263	7.50299e-05	0.216404
46	0.19539	0.541294	0.824124	999638231	94110	0.000361769	9.41352e-05	0.000348194	9.01828e-05	0.000351281	9.10942e-05	0.000353635	9.17662e-05	0.000355566	9.23036e-05	0.217916
47	0.195399	0.541268	0.822127	999524681	113550	0.000475319	0.000113591	0.000456728	0.000108534	0.000461003	0.000109722	0.000464212	0.000110576	0.000466816	0.000111249	0.218207
48	0.195411	0.541237	0.823994	999388259	136422	0.000611741	0.000136487	0.00058676	0.000130032	0.000592582	0.000131579	0.000596876	0.000132664	0.000600325	0.000133509	0.220095
49	0.195425	0.5412	0.824703	999225261	162998	0.000774739	0.000163098	0.000741647	0.000154887	0.000749482	0.0001569	0.000755152	0.000158276	0.000759657	0.000159332	0.222826
50	0.195441	0.541156	0.823165	999034221	191040	0.000965779	0.000191188	0.00092257	0.000180923	0.00093298	0.000183498	0.000940371	0.000185219	0.000946174	0.000186517	0.222965
51	0.19546	0.541105	0.824373	998808982	225239	0.00119102	0.000225457	0.00113509	0.000212521	0.00114882	0.00021584	0.00115839	0.000218021	0.0011658	0.000219629	0.225844
52	0.195482	0.541045	0.825232	998545234	263748	0.00145477	0.000264063	0.00138293	0.00024784	0.00140092	0.000252097	0.00141325	0.000254856	0.00142264	0.00025684	0.228407
53	0.195509	0.540975	0.823374	998237868	307366	0.00176213	0.000307814	0.00167047	0.000287538	0.00169389	0.000292969	0.0017097	0.000296455	0.00172154	0.0002989	0.230946
54	0.195539	0.540893	0.823779	997880745	357123	0.00211926	0.000357753	0.00200293	0.000332457	0.00203324	0.000339353	0.00205347	0.000343763	0.00206832	0.000346777	0.233742
55	0.195574	0.540799	0.82425	997466805	413940	0.00253319	0.000414819	0.00238623	0.000383302	0.00242526	0.000392018	0.00245106	0.000397598	0.00246965	0.000401327	0.236839
56	0.195614	0.54069	0.823349	996988539	478266	0.00301146	0.000479481	0.00282654	0.000440313	0.00287652	0.000451261	0.00290937	0.000458308	0.00293259	0.00046294	0.239973
57	0.195661	0.540563	0.82402	996435355	553184	0.00356464	0.000554855	0.00333264	0.000506103	0.00339633	0.000519819	0.00343812	0.000528747	0.00346712	0.000534533	0.244119
58	0.195716	0.540417	0.823763	995797051	638304	0.00420295	0.000640587	0.00391266	0.00058002	0.00399346	0.000597127	0.00404652	0.000608406	0.00408277	0.000615644	0.248415
59	0.195778	0.540249	0.823941	995063056	733995	0.00493694	0.000737093	0.00457476	0.000662097	0.00467676	0.000683298	0.004744	0.000697471	0.0047893	0.000706536	0.252565
60	0.19585	0.540056	0.823701	994218216	844840	0.00578178	0.000849032	0.00533088	0.000756123	0.00545907	0.000782309	0.00554409	0.000800097	0.00560079	0.000811486	0.257665
61	0.195932	0.539834	0.823067	993249789	968427	0.00675021	0.000974059	0.00619037	0.000859484	0.00635065	0.000891577	0.00645784	0.000913745	0.0065288	0.000928015	0.262418
62	0.196028	0.539578	0.823875	992135464	1114325	0.00786454	0.0011219	0.00717049	0.000980121	0.00737013	0.00101948	0.00750495	0.00104711	0.0075939	0.0010651	0.26892
63	0.196136	0.539284	0.82334	990861045	1274419	0.00913896	0.00128452	0.00828065	0.00111016	0.00852818	0.00115805	0.00869716	0.00119221	0.00880863	0.00121473	0.274569
64	0.196261	0.538948	0.822576	989400636	1460409	0.0105994	0.00147388	0.00953972	0.00125908	0.00984554	0.00131735	0.0100567	0.00135954	0.0101964	0.00138774	0.281582
65	0.196404	0.538563	0.822901	987732335	1668301	0.0122677	0.00168617	0.0109622	0.00142245	0.0113387	0.00149311	0.0116015	0.00154482	0.0117763	0.00157995	0.288593
66	0.196567	0.538123	0.82222	985826528	1905807	0.0141735	0.00192948	0.012568	0.00160578	0.0130301	0.00169141	0.0133561	0.00175457	0.0135745	0.0017982	0.296554
67	0.196753	0.53762	0.821767	983653054	2173474	0.0163469	0.00220472	0.014376	0.00180804	0.0149418	0.00191171	0.0153446	0.00198849	0.0156169	0.00204238	0.305053
68	0.196966	0.537045	0.821562	981179263	2473791	0.0188207	0.0025149	0.0164056	0.00202963	0.0170967	0.00215494	0.0175925	0.00224791	0.0179311	0.00231421	0.314065
69	0.197209	0.536389	0.82187	978365746	2813517	0.0216343	0.00286749	0.0186797	0.00227405	0.0195224	0.00242565	0.0201304	0.00253792	0.0205503	0.00261919	0.324075
70	0.197485	0.535641	0.821189	975170616	3195130	0.0248294	0.00326578	0.0212205	0.0025408	0.0222466	0.00272428	0.02299	0.00285961	0.0235089	0.00295864	0.334964
71	0.197798	0.53479	0.82064	971552150	3618466	0.0284479	0.0037106	0.0240473	0.00282684	0.0252955	0.00304881	0.0262014	0.00321141	0.0268402	0.00333132	0.346417
72	0.198154	0.533824	0.820255	967464400	4087750	0.0325356	0.00420744	0.0271792	0.00313193	0.0286959	0.00340046	0.0297969	0.00359544	0.0305801	0.00373984	0.358634
73	0.198557	0.53273	0.819522	962852584	4611816	0.0371474	0.00476691	0.030638	0.00345875	0.0324797	0.00378379	0.0338143	0.0040174	0.0347708	0.00419071	0.372167
74	0.199011	0.531492	0.818827	957671413	5181171	0.0423286	0.00538106	0.0344337	0.00379575	0.0366674	0.00418773	0.0382812	0.00446689	0.0394445	0.00467365	0.386082
75	0.199523	0.530095	0.817986	951859485	5811928	0.0481405	0.00606881	0.0385838	0.00415009	0.0412891	0.0046217	0.0432366	0.00495545	0.0446461	0.00520162	0.401533
76	0.200098	0.528523	0.816912	945369167	6490318	0.0546308	0.00681857	0.0430903	0.00450649	0.0463595	0.0050704	0.0487052	0.00546855	0.0504063	0.00576019	0.417497
77	0.200742	0.526756	0.816474	938146378	7222789	0.0618536	0.00764018	0.0479533	0.004863	0.0518935	0.00553392	0.0547135	0.00600839	0.0567592	0.00635291	0.434494
78	0.20146	0.524778	0.815301	930133545	8012833	0.0698665	0.00854113	0.0531679	0.00521455	0.0579029	0.00600942	0.0612877	0.00657417	0.0637392	0.00698006	0.452816
79	0.202262	0.522565	0.814229	921269358	8864187	0.0787306	0.00953002	0.0587236	0.00555572	0.0643968	0.00649395	0.0684523	0.00716457	0.0713814	0.00764217	0.472771
80	0.20315	0.520101	0.812863	911520444	9748914	0.0884796	0.010582	0.0645849	0.00586134	0.0713582	0.00696136	0.0762047	0.00775243	0.0796937	0.00831227	0.493075
81	0.204132	0.517366	0.811485	900842389	10678055	0.0991576	0.0117146	0.070716	0.00613107	0.0787724	0.0074142	0.0845467	0.00834196	0.0886907	0.00899701	0.514623
82	0.205214	0.514337	0.80995	889193355	11649034	0.110807	0.0129313	0.0770705	0.00635449	0.0866155	0.00784312	0.0934719	0.0089252	0.0983811	0.00969042	0.537584
83	0.206403	0.510992	0.808396	876545731	12647624	0.123454	0.0142237	0.0835862	0.00651574	0.0948463	0.00823076	0.102957	0.0094854	0.108758	0.0103768	0.561641
84	0.2077	0.507313	0.806531	862882930	13662801	0.137117	0.0155871	0.0901904	0.00660419	0.10341	0.0085633	0.112967	0.0100094	0.119801	0.0110431	0.586701
85	0.209112	0.503286	0.803971	848200887	14682043	0.151799	0.0170151	0.0968018	0.0066114	0.112237	0.00882728	0.123451	0.0104839	0.131476	0.0116753	0.612651
86	0.210643	0.498883	0.801664	832489530	15711357	0.16751	0.0185232	0.103341	0.00653891	0.121258	0.00902107	0.13436	0.010909	0.14375	0.0122741	0.640164
87	0.212294	0.494092	0.799035	815775674	16713856	0.184224	0.020077	0.109713	0.00637191	0.130375	0.00911732	0.145613	0.0112532	0.156556	0.0128057	0.668162
88	0.214068	0.488886	0.796453	798070173	17705501	0.20193	0.0217039	0.115833	0.00612026	0.139497	0.00912143	0.157135	0.0115223	0.169835	0.0132787	0.697711
89	0.215965	0.483255	0.793215	779414805	18655368	0.220585	0.0233756	0.121612	0.00577934	0.148514	0.00901745	0.168828	0.0116924	0.183502	0.013667	0.727998
90	0.217985	0.477181	0.789908	759852699	19562106	0.240147	0.0250985	0.126972	0.00536011	0.157323	0.00880891	0.180589	0.0117613	0.19747	0.0139686	0.759358
91	0.220124	0.470653	0.786127	739451396	20401303	0.260549	0.026849	0.131844	0.00487153	0.165814	0.00849082	0.192303	0.0117139	0.211636	0.0141654	0.791203
92	0.222381	0.463665	0.781871	718280906	21170490	0.281719	0.02863	0.136177	0.00433349	0.173885	0.00807093	0.203851	0.0115484	0.22589	0.0142538	0.823744
93	0.224745	0.456202	0.777599	696425181	21855725	0.303575	0.0304278	0.139944	0.00376618	0.18144	0.00755487	0.215111	0.0112595	0.240113	0.0142232	0.856704
94	0.22721	0.448261	0.772749	673970376	22454805	0.32603	0.032243	0.143137	0.0031933	0.188396	0.00695639	0.225965	0.010854	0.254187	0.0140738	0.890199
95	0.229765	0.439839	0.767492	651007393	22962983	0.348993	0.0340712	0.145774	0.00263764	0.194688	0.00629197	0.236305	0.0103403	0.267993	0.013806	0.924195
96	0.232395	0.430941	0.761878	627657322	23350071	0.372343	0.0358676	0.147891	0.00211645	0.200264	0.00557565	0.246023	0.00971807	0.2814	0.013407	0.957557
97	0.235083	0.421575	0.755728	604029975	23627347	0.39597	0.0376437	0.149541	0.00165013	0.2051	0.0048364	0.255031	0.00900757	0.294288	0.0128886	0.990692
98	0.237807	0.411755	0.748923	580230098	23799877	0.41977	0.0394018	0.150792	0.00125045	0.209201	0.00410119	0.263258	0.0082269	0.306549	0.0122611	1.02372
99	0.240547	0.401491	0.741768	556370560	23859538	0.443629	0.0411208	0.151712	0.000920859	0.212594	0.00339306	0.270649	0.00739157	0.318082	0.011533	1.05615
100	0.243273	0.390814	0.733829	532568432	23802128	0.467432	0.0427811	0.152372	0.000659676	0.215328	0.00273403	0.277171	0.0065219	0.328801	0.0107182	1.08751
101	0.24596	0.379744	0.725279	508917923	23650509	0.491082	0.0444084	0.152833	0.000460475	0.217472	0.00214368	0.282818	0.00564739	0.338644	0.00984311	1.11851
102	0.24857	0.36832	0.716299	485546907	23371016	0.514453	0.045923	0.153145	0.000312354	0.219104	0.00163223	0.287602	0.00478393	0.347554	0.00890985	1.14716
103	0.251069	0.356585	0.706373	462547436	22999471	0.537453	0.0473682	0.15335	0.000205615	0.220313	0.00120839	0.291566	0.00396327	0.355504	0.00795023	1.17458
104	0.253415	0.344588	0.695848	440022846	22524590	0.559977	0.0486968	0.153481	0.00013098	0.221182	0.000869337	0.294769	0.00320322	0.362482	0.00697801	1.19963
105	0.255567	0.33239	0.68418	418056136	21966710	0.581944	0.0499217	0.153562	8.06178e-05	0.221791	0.000608807	0.297292	0.00252321	0.368501	0.00601899	1.22263
106	0.257484	0.320034	0.6722	396717104	21339032	0.603283	0.0510435	0.15361	4.77994e-05	0.222206	0.000415471	0.299226	0.00193417	0.373596	0.00509544	1.2436
107	0.25912	0.307597	0.658991	376078243	20638861	0.623922	0.0520241	0.153637	2.71401e-05	0.222482	0.000275838	0.300668	0.00144142	0.377821	0.00422467	1.26163
108	0.260435	0.295152	0.644918	356206955	19871288	0.643793	0.0528382	0.153652	1.48041e-05	0.22266	0.000177649	0.301712	0.00104404	0.381245	0.00342422	1.27609
109	0.261386	0.282756	0.630164	337135344	19071611	0.662865	0.0535408	0.153659	7.62864e-06	0.222771	0.000110901	0.302448	0.000736069	0.383957	0.00271217	1.28833
110	0.261935	0.270495	0.614301	318914417	18220927	0.681086	0.0540463	0.153663	3.73529e-06	0.222838	6.68708e-05	0.302953	0.000504993	0.38605	0.00209295	1.29625
111	0.262057	0.258416	0.597676	301540126	17374291	0.69846	0.0544795	0.153665	1.73743e-06	0.222876	3.89184e-05	0.303291	0.000338277	0.387625	0.00157481	1.30286
112	0.261722	0.246604	0.580047	285045127	16494999	0.714955	0.0547025	0.153666	7.42275e-07	0.222898	2.16909e-05	0.303512	0.000220456	0.388777	0.00115201	1.30483
113	0.260914	0.235118	0.56171	269434209	15610918	0.730566	0.0547665	0.153666	3.12218e-07	0.22291	1.16301e-05	0.303651	0.000139562	0.389597	0.000820198	1.30337
114	0.259623	0.224018	0.542577	254704368	14729841	0.745296	0.0546695	0.153666	7.36492e-08	0.222916	5.89194e-06	0.303737	8.5654e-05	0.390166	0.000568498	1.29843
115	0.257865	0.213351	0.52261	240833952	13870416	0.759166	0.0544569	0.153666	0	0.222918	2.84344e-06	0.303788	5.09044e-05	0.39055	0.000384419	1.29105
116	0.255655	0.203155	0.502249	227804491	13029461	0.772196	0.0541014	0.153666	0	0.22292	1.30295e-06	0.303817	2.9186e-05	0.390804	0.000253684	1.28057
117	0.253014	0.193452	0.481362	215574452	12230039	0.784426	0.0536866	0.153666	0	0.22292	5.50352e-07	0.303833	1.60825e-05	0.390967	0.000163454	1.26895
118	0.249998	0.184278	0.460011	204125640	11448812	0.795874	0.0531084	0.153666	0	0.222921	2.28976e-07	0.303841	8.52936e-06	0.39107	0.000102352	1.25371
119	0.246648	0.175635	0.438706	193412997	10712643	0.806587	0.0524806	0.153666	0	0.222921	5.35632e-08	0.303846	4.28506e-06	0.391132	6.2294e-05	1.23751
120	0.243031	0.167524	0.417375	183396158	10016839	0.816604	0.0517899	0.153666	0	0.222921	0	0.303848	2.05345e-06	0.391169	3.67618e-05	1.22001
