# Supplementary material for: Quantifying the Potential for Future Gene Therapy to Lower Lifetime Risk of Polygenic Late-Onset Diseases
Source: MDPI journal article supplement (doi:10.3390/ijms20133352), 2019-07-08
Supplement: s2 [file s2 › SuppFiles/Results/LODsCommonLow/Stroke/-1.000/IndividualsByBetaDistrib.csv]

nEntry	Beta	nDetrimentalCount	nFractionPopulation	nCumulativeFractionPopulation	nEditsNeeded	nIndividuals
0	-19.8	0	0	1	0	0
1	-19.6	0	0	1	0	0
2	-19.4	0	0	1	0	0
3	-19.2	0	0	1	0	0
4	-19	0	0	1	0	0
5	-18.8	0	0	1	0	0
6	-18.6	0	0	1	0	0
7	-18.4	0	0	1	0	0
8	-18.2	0	0	1	0	0
9	-18	0	0	1	0	0
10	-17.8	0	0	1	0	0
11	-17.6	0	0	1	0	0
12	-17.4	0	0	1	0	0
13	-17.2	0	0	1	0	0
14	-17	0	0	1	0	0
15	-16.8	0	0	1	0	0
16	-16.6	0	0	1	0	0
17	-16.4	0	0	1	0	0
18	-16.2	0	0	1	0	0
19	-16	0	0	1	0	0
20	-15.8	0	0	1	0	0
21	-15.6	0	0	1	0	0
22	-15.4	0	0	1	0	0
23	-15.2	0	0	1	0	0
24	-15	0	0	1	0	0
25	-14.8	0	0	1	0	0
26	-14.6	0	0	1	0	0
27	-14.4	0	0	1	0	0
28	-14.2	0	0	1	0	0
29	-14	0	0	1	0	0
30	-13.8	0	0	1	0	0
31	-13.6	0	0	1	0	0
32	-13.4	0	0	1	0	0
33	-13.2	0	0	1	0	0
34	-13	0	0	1	0	0
35	-12.8	0	0	1	0	0
36	-12.6	0	0	1	0	0
37	-12.4	0	0	1	0	0
38	-12.2	0	0	1	0	0
39	-12	0	0	1	0	0
40	-11.8	0	0	1	0	0
41	-11.6	0	0	1	0	0
42	-11.4	0	0	1	0	0
43	-11.2	0	0	1	0	0
44	-11	0	0	1	0	0
45	-10.8	0	0	1	0	0
46	-10.6	0	0	1	0	0
47	-10.4	0	0	1	0	0
48	-10.2	0	0	1	0	0
49	-10	0	0	1	0	0
50	-9.8	0	0	1	0	0
51	-9.6	0	0	1	0	0
52	-9.4	0	0	1	0	0
53	-9.2	290	1e-09	1	0	1
54	-9	286	4e-09	1	0	4
55	-8.8	291.33	3e-09	1	0	3
56	-8.6	292.11	9e-09	0.99999999	0	9
57	-8.4	293.38	1.3e-08	0.99999998	0	13
58	-8.2	295.33	2.7e-08	0.99999997	0	27
59	-8	297.8	6.1e-08	0.99999994	0	61
60	-7.8	299.66	1.37e-07	0.99999988	0	137
61	-7.6	300.91	2.39e-07	0.99999974	0	239
62	-7.4	302.96	4.3e-07	0.99999951	0	430
63	-7.2	305.08	8.45e-07	0.99999908	0	845
64	-7	306.79	1.53e-06	0.99999823	0	1530
65	-6.8	308.69	2.986e-06	0.9999967	0	2986
66	-6.6	310.6	5.13e-06	0.99999372	0	5130
67	-6.4	312.53	9.213e-06	0.99998858	0	9213
68	-6.2	314.37	1.6035e-05	0.99997937	0	16035
69	-6	316.38	2.7131e-05	0.99996334	0	27131
70	-5.8	318.31	4.5503e-05	0.99993621	0	45503
71	-5.6	320.19	7.5259e-05	0.9998907	0	75259
72	-5.4	322.07	0.000121237	0.99981544	0	121237
73	-5.2	323.99	0.000191795	0.99969421	0	191795
74	-5	325.91	0.000295925	0.99950241	0	295925
75	-4.8	327.8	0.000451199	0.99920649	0	451199
76	-4.6	329.7	0.000674077	0.99875529	0	674077
77	-4.4	331.6	0.000988789	0.99808121	0	988789
78	-4.2	333.5	0.001422768	0.99709242	0	1422768
79	-4	335.4	0.00201891	0.99566965	0	2018910
80	-3.8	337.3	0.002802835	0.99365074	0	2802835
81	-3.6	339.2	0.003831697	0.99084791	0	3831697
82	-3.4	341.1	0.00513638	0.98701621	0	5136380
83	-3.2	342.99	0.006761375	0.98187983	0	6761375
84	-3	344.89	0.008750499	0.97511846	0	8750499
85	-2.8	346.79	0.011125312	0.96636796	0	11125312
86	-2.6	348.68	0.013895787	0.95524265	0	13895787
87	-2.4	350.58	0.017064784	0.94134686	0	17064784
88	-2.2	352.47	0.020570726	0.92428208	0	20570726
89	-2	354.37	0.024382787	0.90371135	0	24382787
90	-1.8	356.26	0.028392134	0.87932856	0	28392134
91	-1.6	358.15	0.032507885	0.85093643	0	32507885
92	-1.4	360.04	0.036564862	0.81842854	0	36564862
93	-1.2	361.94	0.040437001	0.78186368	0	40437001
94	-1	363.83	0.043957663	0.74142668	0	43957663
95	-0.8	365.72	0.046977721	0.69746902	0	46977721
96	-0.6	367.61	0.04935536	0.6504913	0	49355360
97	-0.4	369.5	0.050963495	0.60113594	0	50963495
98	-0.2	371.39	0.051753012	0.55017244	0	51753012
99	0	373.28	0.05167868	0.49841943	0	51678680
100	0.2	375.17	0.050749139	0.44674075	1.8868	50749139
101	0.4	377.05	0.048974932	0.39599161	3.7756	48974932
102	0.6	378.94	0.046500783	0.34701668	5.6626	46500783
103	0.8	380.83	0.043431275	0.30051589	7.5499	43431275
104	1	382.72	0.039873317	0.25708462	9.4378	39873317
105	1.2	384.6	0.036005371	0.2172113	11.325	36005371
106	1.4	386.49	0.03198498	0.18120593	13.213	31984980
107	1.6	388.38	0.027952893	0.14922095	15.097	27952893
108	1.8	390.26	0.024033299	0.12126806	16.985	24033299
109	2	392.15	0.020322291	0.09723476	18.87	20322291
110	2.2	394.03	0.016907101	0.076912469	20.753	16907101
111	2.4	395.92	0.0138264	0.060005368	22.638	13826400
112	2.6	397.8	0.011140547	0.046178968	24.523	11140547
113	2.8	399.69	0.008826618	0.035038421	26.408	8826618
114	3	401.57	0.006878731	0.026211803	28.292	6878731
115	3.2	403.45	0.005280318	0.019333072	30.172	5280318
116	3.4	405.33	0.003982062	0.014052754	32.056	3982062
117	3.6	407.22	0.00295864	0.010070692	33.937	2958640
118	3.8	409.1	0.002159447	0.007112052	35.824	2159447
119	4	410.99	0.001554025	0.004952605	37.707	1554025
120	4.2	412.87	0.001100197	0.00339858	39.589	1100197
121	4.4	414.75	0.000766121	0.002298383	41.469	766121
122	4.6	416.62	0.00052659	0.001532262	43.343	526590
123	4.8	418.53	0.000355693	0.001005672	45.252	355693
124	5	420.39	0.000235867	0.000649979	47.109	235867
125	5.2	422.27	0.000154215	0.000414112	48.992	154215
126	5.4	424.13	9.9148e-05	0.000259897	50.857	99148
127	5.6	426.05	6.3034e-05	0.000160749	52.773	63034
128	5.8	427.9	3.8966e-05	9.7715e-05	54.623	38966
129	6	429.7	2.4143e-05	5.8749e-05	56.426	24143
130	6.2	431.65	1.4435e-05	3.4606e-05	58.375	14435
131	6.4	433.54	8.566e-06	2.0171e-05	60.263	8566
132	6.6	435.39	5e-06	1.1605e-05	62.11	5000
133	6.8	437.37	2.999e-06	6.605e-06	64.095	2999
134	7	439.1	1.58e-06	3.606e-06	65.826	1580
135	7.2	441.29	9.39e-07	2.026e-06	68.009	939
136	7.4	442.88	4.85e-07	1.087e-06	69.6	485
137	7.6	445.32	2.63e-07	6.02e-07	72.045	263
138	7.8	447.41	1.64e-07	3.39e-07	74.13	164
139	8	448.61	9e-08	1.75e-07	75.333	90
140	8.2	449.8	5e-08	8.5e-08	76.522	50
141	8.4	452.41	2.2e-08	3.5e-08	79.131	22
142	8.6	455.71	7e-09	1.3e-08	82.436	7
143	8.8	458.33	3e-09	6e-09	85.055	3
144	9	453	2e-09	3e-09	79.722	2
145	9.2	459	1e-09	1e-09	85.722	1
146	9.4	0	0	0	0	0
147	9.6	0	0	0	0	0
148	9.8	0	0	0	0	0
149	10	0	0	0	0	0
150	10.2	0	0	0	0	0
151	10.4	0	0	0	0	0
152	10.6	0	0	0	0	0
153	10.8	0	0	0	0	0
154	11	0	0	0	0	0
155	11.2	0	0	0	0	0
156	11.4	0	0	0	0	0
157	11.6	0	0	0	0	0
158	11.8	0	0	0	0	0
159	12	0	0	0	0	0
160	12.2	0	0	0	0	0
161	12.4	0	0	0	0	0
162	12.6	0	0	0	0	0
163	12.8	0	0	0	0	0
164	13	0	0	0	0	0
165	13.2	0	0	0	0	0
166	13.4	0	0	0	0	0
167	13.6	0	0	0	0	0
168	13.8	0	0	0	0	0
169	14	0	0	0	0	0
170	14.2	0	0	0	0	0
171	14.4	0	0	0	0	0
172	14.6	0	0	0	0	0
173	14.8	0	0	0	0	0
174	15	0	0	0	0	0
175	15.2	0	0	0	0	0
176	15.4	0	0	0	0	0
177	15.6	0	0	0	0	0
178	15.8	0	0	0	0	0
179	16	0	0	0	0	0
180	16.2	0	0	0	0	0
181	16.4	0	0	0	0	0
182	16.6	0	0	0	0	0
183	16.8	0	0	0	0	0
184	17	0	0	0	0	0
185	17.2	0	0	0	0	0
186	17.4	0	0	0	0	0
187	17.6	0	0	0	0	0
188	17.8	0	0	0	0	0
189	18	0	0	0	0	0
190	18.2	0	0	0	0	0
191	18.4	0	0	0	0	0
192	18.6	0	0	0	0	0
193	18.8	0	0	0	0	0
194	19	0	0	0	0	0
195	19.2	0	0	0	0	0
196	19.4	0	0	0	0	0
197	19.6	0	0	0	0	0
198	19.8	0	0	0	0	0
199	20	0	0	0	0	0
