# Supplementary material for: Quantifying the Potential for Future Gene Therapy to Lower Lifetime Risk of Polygenic Late-Onset Diseases
Source: MDPI journal article supplement (doi:10.3390/ijms20133352), 2019-07-08
Supplement: s2 [file s2 › SuppFiles/Results/LODsCommonLow/Stroke/0.250/FrailtyAnalysis.csv]

Age	Heritability	MeanOR	CaseOR	nControls	nCases	nCumIncidence	nIncidence	nLifeIncidence0	nAbsIncidence0	nLifeIncidence5	nAbsIncidence5	nLifeIncidence10	nAbsIncidence10	nLifeIncidence15	nAbsIncidence15	nIncActDivExp
39	0.418284	0.250003	2.74166	999991556	8444	8.444e-06	8.444e-06	8.19938e-06	8.19938e-06	8.25409e-06	8.25409e-06	8.29902e-06	8.29902e-06	8.33799e-06	8.33799e-06	0.246276
40	0.418273	0.249992	2.75019	999973244	18312	2.6756e-05	1.83122e-05	2.59534e-05	1.7754e-05	2.61326e-05	1.78785e-05	2.62784e-05	1.79794e-05	2.6404e-05	1.8066e-05	0.250961
41	0.418255	0.249975	2.80334	999943803	29441	5.6197e-05	2.94418e-05	5.4451e-05	2.84976e-05	5.48403e-05	2.87078e-05	5.51543e-05	2.88759e-05	5.54229e-05	2.9019e-05	0.252611
42	0.41823	0.24995	2.74758	999902088	41715	9.7912e-05	4.17173e-05	9.47596e-05	4.03086e-05	9.54628e-05	4.06225e-05	9.60241e-05	4.08699e-05	9.65016e-05	4.10786e-05	0.251853
43	0.418197	0.249916	2.74684	999846174	55914	0.000153826	5.59195e-05	0.000148689	5.39291e-05	0.000149837	5.43738e-05	0.000150744	5.472e-05	0.000151509	5.50079e-05	0.253116
44	0.418154	0.249873	2.75868	999774497	71677	0.000225503	7.1688e-05	0.000217684	6.89956e-05	0.000219437	6.96005e-05	0.000220809	7.0065e-05	0.000221956	7.04463e-05	0.253173
45	0.4181	0.249819	2.72742	999684785	89712	0.000315215	8.97322e-05	0.000303854	8.61702e-05	0.000306416	8.69785e-05	0.000308397	8.75881e-05	0.000310038	8.80824e-05	0.254059
46	0.418035	0.249754	2.73395	999574575	110210	0.000425425	0.000110245	0.000409465	0.000105611	0.000413094	0.000106678	0.000415862	0.000107465	0.000418133	0.000108095	0.255208
47	0.417957	0.249674	2.69962	999441449	133126	0.000558551	0.000133183	0.00053671	0.000127245	0.000541732	0.000128638	0.000545502	0.000129639	0.000548562	0.000130429	0.255842
48	0.417863	0.249579	2.72145	999282416	159033	0.000717584	0.000159122	0.000688294	0.000151584	0.000695119	0.000153387	0.000700154	0.000154652	0.000704198	0.000155637	0.256596
49	0.417753	0.249467	2.67981	999093001	189415	0.000906999	0.000189551	0.000868284	0.00017999	0.000877448	0.000182329	0.000884082	0.000183928	0.000889353	0.000185155	0.258966
50	0.417622	0.249335	2.69105	998870218	222783	0.00112978	0.000222985	0.00107927	0.000210984	0.00109144	0.000213988	0.00110008	0.000215995	0.00110686	0.000217509	0.260047
51	0.417472	0.249181	2.64782	998609631	260587	0.00139037	0.000260882	0.00132514	0.000245873	0.00134115	0.000249713	0.00135231	0.000252236	0.00136096	0.000254097	0.26133
52	0.417299	0.249003	2.62851	998306517	303114	0.00169348	0.000303536	0.00160997	0.000284832	0.00163087	0.000289724	0.00164521	0.000292895	0.00165613	0.000295175	0.262551
53	0.417099	0.248796	2.60391	997953482	353035	0.00204652	0.000353634	0.00194023	0.000330261	0.00196737	0.000336499	0.00198571	0.000340502	0.00199945	0.000343311	0.265324
54	0.41687	0.248558	2.58466	997544767	408715	0.00245523	0.000409553	0.00232072	0.000380485	0.00235575	0.000388377	0.00237913	0.000393425	0.00239632	0.000396875	0.267586
55	0.416608	0.248284	2.55591	997073874	470893	0.00292613	0.000472052	0.00275676	0.00043604	0.0028017	0.000445955	0.00283144	0.000452302	0.00285286	0.000456545	0.269516
56	0.416312	0.247972	2.51262	996531717	542157	0.00346828	0.000543748	0.00325589	0.000499134	0.00331325	0.000511544	0.00335097	0.000519533	0.00337765	0.000524784	0.272137
57	0.415973	0.247614	2.49278	995907737	623980	0.00409226	0.000626152	0.00382677	0.000570873	0.00389959	0.000586345	0.00394739	0.000596416	0.00398059	0.000602943	0.275488
58	0.415591	0.247207	2.46016	995194574	713163	0.00480543	0.000716093	0.00447481	0.000648044	0.00456675	0.000667157	0.00462714	0.000679758	0.00466844	0.000687846	0.277695
59	0.41516	0.246744	2.42081	994378029	816545	0.00562197	0.000820488	0.00521137	0.00073656	0.00532689	0.000760146	0.00540306	0.000775914	0.00545443	0.000785998	0.28114
60	0.414676	0.24622	2.38006	993446610	931419	0.00655339	0.000936685	0.00604498	0.000833611	0.00618937	0.00086248	0.00628515	0.000882091	0.00634908	0.000894647	0.284266
61	0.414132	0.245628	2.33843	992385143	1061467	0.00761486	0.00106847	0.00698704	0.000942057	0.00716661	0.000977234	0.00728668	0.00100153	0.00736625	0.00101717	0.287853
62	0.413525	0.244961	2.28933	991178471	1206672	0.00882153	0.00121593	0.00804838	0.00106135	0.00827058	0.00110397	0.00842057	0.00113389	0.00851962	0.00115337	0.29146
63	0.412846	0.244212	2.24785	989809571	1368900	0.0101904	0.00138108	0.00924085	0.00119246	0.00951449	0.00124391	0.00970116	0.00128059	0.0098244	0.00130478	0.29521
64	0.412091	0.243369	2.20407	988257595	1551976	0.0117424	0.00156795	0.0105789	0.00133802	0.0109144	0.00139995	0.0111459	0.00144478	0.0112992	0.00147475	0.299554
65	0.411251	0.242427	2.15307	986501314	1756281	0.0134987	0.00177715	0.0120763	0.00149747	0.0124863	0.00157185	0.0127722	0.00162629	0.0129624	0.00166327	0.304164
66	0.410323	0.241375	2.10293	984520881	1980433	0.0154791	0.00200753	0.013745	0.00166865	0.0142439	0.00175764	0.0145955	0.00182328	0.014831	0.00186861	0.308551
67	0.4093	0.240207	2.04883	982291546	2229335	0.0177085	0.00226439	0.0155995	0.00185451	0.0162048	0.00196085	0.0166351	0.0020396	0.0169259	0.00209487	0.313309
68	0.408176	0.238911	1.99421	979788848	2502698	0.0202112	0.00254782	0.0176528	0.00205335	0.0183849	0.00218013	0.0189093	0.00227418	0.0192671	0.00234125	0.318175
69	0.406944	0.23748	1.93552	976982110	2806738	0.0230179	0.00286464	0.0199214	0.00226857	0.0208047	0.0024198	0.0214411	0.0025318	0.02188	0.00261288	0.323753
70	0.405601	0.235906	1.8779	973850100	3132010	0.0261499	0.0032058	0.022412	0.00249061	0.0234752	0.00267046	0.0242442	0.00280312	0.0247802	0.00290019	0.328812
71	0.404141	0.234181	1.8176	970362324	3487776	0.0296377	0.00358143	0.0251368	0.00272474	0.0264139	0.0029387	0.0273396	0.00309542	0.0279912	0.003211	0.334358
72	0.402559	0.232295	1.75871	966487583	3874741	0.0335124	0.00399309	0.0281055	0.00296873	0.0296371	0.00322326	0.0307477	0.00340809	0.0315362	0.00354496	0.340363
73	0.400853	0.230246	1.69793	962201663	4285920	0.0377983	0.00443453	0.0313198	0.00321433	0.0331535	0.0035164	0.0344812	0.00373351	0.0354308	0.00389457	0.346217
74	0.399017	0.228026	1.63828	957473635	4728028	0.0425264	0.00491376	0.0347836	0.00346378	0.036975	0.00382148	0.0385574	0.00407622	0.0396957	0.00426489	0.352554
75	0.397051	0.225634	1.57745	952280805	5192830	0.0477192	0.00542347	0.0384916	0.00370802	0.0411044	0.00412939	0.042985	0.00442759	0.0443432	0.00464753	0.358835
76	0.394954	0.223068	1.51776	946601987	5678818	0.053398	0.00596339	0.0424347	0.00394303	0.0455408	0.00443643	0.0477698	0.0047848	0.0493832	0.00503998	0.365135
77	0.392731	0.220331	1.45672	940413118	6188869	0.0595869	0.00653798	0.0466015	0.00416687	0.0502826	0.00474176	0.0529181	0.0051483	0.0548267	0.00544351	0.371813
78	0.39038	0.217424	1.39816	933702841	6710277	0.0662972	0.00713546	0.0509684	0.00436688	0.0553151	0.00503254	0.0584236	0.00550548	0.0606721	0.00584539	0.378293
79	0.387904	0.214351	1.34012	926452061	7250780	0.0735479	0.00776562	0.0555129	0.0045445	0.0606271	0.00531196	0.0642841	0.00586052	0.0669233	0.00625119	0.385242
80	0.385311	0.211123	1.28245	918658567	7793494	0.0813414	0.00841219	0.0601986	0.00468568	0.0661921	0.00556506	0.0704816	0.00619746	0.0735683	0.00664501	0.39197
81	0.382607	0.207747	1.22578	910316502	8342065	0.0896835	0.0090807	0.0649884	0.00478981	0.0719844	0.00579223	0.0769986	0.00651703	0.080597	0.00702877	0.398917
82	0.379799	0.204235	1.1717	901430880	8885622	0.0985691	0.00976102	0.0698355	0.00484706	0.0779669	0.00598256	0.0838066	0.00680794	0.0879887	0.00739164	0.40579
83	0.376899	0.200601	1.11717	892007979	9422901	0.107992	0.0104533	0.0746899	0.00485444	0.0840991	0.00613219	0.0908735	0.00706694	0.0957197	0.00773107	0.412761
84	0.373911	0.196858	1.06625	882062380	9945599	0.117938	0.0111497	0.0794973	0.0048074	0.0903326	0.0062335	0.0981597	0.0072862	0.103758	0.00803863	0.419676
85	0.370843	0.193022	1.0169	871616738	10445642	0.128383	0.0118423	0.084201	0.00470372	0.0966129	0.00628023	0.105619	0.00745887	0.112065	0.00830648	0.426397
86	0.36771	0.189106	0.968863	860682122	10934616	0.139318	0.0125452	0.0887519	0.00455088	0.102891	0.00627838	0.113211	0.00759234	0.120607	0.0085424	0.433565
87	0.364521	0.18513	0.922926	849297740	11384382	0.150702	0.0132272	0.093092	0.00434012	0.109101	0.00621012	0.120876	0.00766493	0.12933	0.00872243	0.440201
88	0.361287	0.18111	0.878617	837491434	11806306	0.162509	0.0139013	0.0971731	0.00408109	0.115184	0.00608231	0.128559	0.00768325	0.138184	0.00885443	0.446881
89	0.358018	0.17706	0.836441	825292777	12198657	0.174707	0.0145657	0.100952	0.00377908	0.12108	0.00589646	0.136205	0.00764563	0.147121	0.0089368	0.453627
90	0.354722	0.172993	0.79618	812729467	12563310	0.187271	0.0152229	0.104395	0.00344241	0.126737	0.00565732	0.143758	0.00755344	0.156092	0.00897102	0.46057
91	0.351413	0.168929	0.757882	799858417	12871050	0.200142	0.0158368	0.107468	0.00307341	0.132094	0.0053568	0.151148	0.00739024	0.165029	0.00893688	0.466689
92	0.348095	0.164878	0.721442	786704139	13154278	0.213296	0.0164458	0.110161	0.00269261	0.137109	0.00501487	0.158324	0.00717559	0.173885	0.00885658	0.473179
93	0.344779	0.160852	0.686671	773306110	13398029	0.226694	0.0170306	0.112469	0.00230875	0.14174	0.0046313	0.165226	0.00690233	0.182604	0.0087191	0.479501
94	0.341474	0.156863	0.653696	759700792	13605318	0.240299	0.0175937	0.114404	0.00193481	0.145955	0.00421486	0.171803	0.0065764	0.191132	0.00852727	0.485746
95	0.338182	0.152922	0.62267	745933615	13767177	0.254066	0.0181218	0.115986	0.00158137	0.149728	0.00377228	0.178002	0.00619943	0.199409	0.00827724	0.491562
96	0.334911	0.149034	0.593381	732029078	13904537	0.267971	0.0186404	0.117246	0.00126031	0.153048	0.00332019	0.183789	0.00578693	0.207393	0.00798364	0.497644
97	0.33167	0.14521	0.565419	718032454	13996624	0.281968	0.0191203	0.118223	0.000977524	0.155913	0.00286504	0.189125	0.005336	0.215028	0.00763509	0.503201
98	0.328458	0.141453	0.539262	703964593	14067861	0.296035	0.0195922	0.118963	0.000739125	0.158337	0.00242417	0.193988	0.00486284	0.222275	0.00724741	0.509037
99	0.325283	0.137767	0.514375	689857783	14106810	0.310142	0.0200391	0.119507	0.000544452	0.160343	0.00200613	0.198358	0.00437022	0.229094	0.00681881	0.514683
100	0.322145	0.134158	0.490972	675742561	14115222	0.324257	0.0204611	0.119898	0.000391203	0.161964	0.00162134	0.202226	0.00386764	0.23545	0.00635616	0.520127
101	0.319051	0.130628	0.468836	661643239	14099322	0.338357	0.0208649	0.120173	0.000274514	0.163242	0.00127796	0.205592	0.00336671	0.241318	0.005868	0.525522
102	0.316003	0.127184	0.447753	647596080	14047159	0.352404	0.0212307	0.12036	0.00018774	0.164223	0.000981054	0.208468	0.00287538	0.246673	0.00535527	0.530345
103	0.312999	0.123823	0.428	633611578	13984502	0.366388	0.0215945	0.120485	0.000125021	0.164958	0.000734746	0.210878	0.00240981	0.251507	0.00483402	0.535476
104	0.310041	0.120547	0.409271	619713585	13897993	0.380286	0.0219346	0.120566	8.08168e-05	0.165495	0.000536393	0.212854	0.00197643	0.255813	0.00430553	0.54035
105	0.307133	0.117357	0.391623	605920543	13793042	0.394079	0.0222571	0.120617	5.06205e-05	0.165877	0.000382274	0.214438	0.00158434	0.259592	0.00377936	0.545098
106	0.304276	0.114254	0.37488	592254075	13666468	0.407746	0.0225549	0.120647	3.06129e-05	0.166143	0.000266086	0.215677	0.00123873	0.262856	0.00326335	0.549519
107	0.301465	0.111234	0.359049	578716441	13537634	0.421284	0.0228578	0.120665	1.7802e-05	0.166324	0.00018093	0.216623	0.000945468	0.265627	0.00277109	0.554322
108	0.298706	0.108299	0.344138	565330989	13385452	0.434669	0.0231296	0.120675	9.97216e-06	0.166444	0.000119666	0.217326	0.000703272	0.267933	0.00230658	0.558601
109	0.295999	0.105448	0.329983	552109780	13221209	0.44789	0.0233867	0.120681	5.28848e-06	0.16652	7.68813e-05	0.217836	0.000510273	0.269813	0.00188019	0.562742
110	0.293344	0.10268	0.316528	539067486	13042294	0.460933	0.0236226	0.120683	2.67367e-06	0.166568	4.78652e-05	0.218198	0.000361467	0.271312	0.0014981	0.566569
111	0.290736	0.0999924	0.30388	526203222	12864264	0.473797	0.0238639	0.120685	1.28643e-06	0.166597	2.8816e-05	0.218448	0.000250467	0.272478	0.00116602	0.570699
112	0.288177	0.0973841	0.291784	513529202	12674020	0.486471	0.0240858	0.120685	5.70331e-07	0.166614	1.66663e-05	0.218618	0.000169388	0.273363	0.000885154	0.574524
113	0.285666	0.0948519	0.280463	501049500	12479702	0.498951	0.0243018	0.120685	2.49594e-07	0.166623	9.29738e-06	0.218729	0.000111569	0.274018	0.000655684	0.578353
114	0.283202	0.0923957	0.269472	488768230	12281270	0.511232	0.0245111	0.120685	6.14063e-08	0.166628	4.91251e-06	0.2188	7.14156e-05	0.274492	0.000473996	0.582151
115	0.280781	0.0900102	0.259464	476691761	12076469	0.523308	0.024708	0.120685	0	0.16663	2.47568e-06	0.218845	4.43206e-05	0.274827	0.000334699	0.58577
116	0.278412	0.0876993	0.249365	464827418	11864343	0.535173	0.0248889	0.120685	0	0.166632	1.18643e-06	0.218871	2.65761e-05	0.275058	0.000230999	0.589118
117	0.276086	0.0854562	0.240207	453174451	11652967	0.546826	0.0250694	0.120685	0	0.166632	5.24384e-07	0.218887	1.53237e-05	0.275214	0.000155742	0.59255
118	0.273801	0.0832806	0.231382	441737627	11436824	0.558262	0.0252371	0.120685	0	0.166632	2.28736e-07	0.218895	8.52043e-06	0.275316	0.000102245	0.595764
119	0.27156	0.0811682	0.222962	430506316	11231311	0.569494	0.0254253	0.120685	0	0.166632	5.61566e-08	0.2189	4.49252e-06	0.275381	6.53101e-05	0.599537
120	0.269362	0.0791194	0.215029	419498155	11008161	0.580502	0.0255703	0.120685	0	0.166632	0	0.218902	2.25667e-06	0.275422	4.04e-05	0.602359
