# Supplementary material for: Quantifying the Potential for Future Gene Therapy to Lower Lifetime Risk of Polygenic Late-Onset Diseases
Source: MDPI journal article supplement (doi:10.3390/ijms20133352), 2019-07-08
Supplement: s2 [file s2 › SuppFiles/Results/LODsCommonLow/Stroke/0.250/IndividualsByBetaDistrib.csv]

nEntry	Beta	nDetrimentalCount	nFractionPopulation	nCumulativeFractionPopulation	nEditsNeeded	nIndividuals
0	-19.8	0	0	1	0	0
1	-19.6	0	0	1	0	0
2	-19.4	0	0	1	0	0
3	-19.2	0	0	1	0	0
4	-19	0	0	1	0	0
5	-18.8	0	0	1	0	0
6	-18.6	0	0	1	0	0
7	-18.4	0	0	1	0	0
8	-18.2	0	0	1	0	0
9	-18	0	0	1	0	0
10	-17.8	0	0	1	0	0
11	-17.6	0	0	1	0	0
12	-17.4	0	0	1	0	0
13	-17.2	0	0	1	0	0
14	-17	0	0	1	0	0
15	-16.8	0	0	1	0	0
16	-16.6	0	0	1	0	0
17	-16.4	0	0	1	0	0
18	-16.2	0	0	1	0	0
19	-16	0	0	1	0	0
20	-15.8	0	0	1	0	0
21	-15.6	0	0	1	0	0
22	-15.4	0	0	1	0	0
23	-15.2	0	0	1	0	0
24	-15	0	0	1	0	0
25	-14.8	0	0	1	0	0
26	-14.6	0	0	1	0	0
27	-14.4	0	0	1	0	0
28	-14.2	0	0	1	0	0
29	-14	0	0	1	0	0
30	-13.8	0	0	1	0	0
31	-13.6	0	0	1	0	0
32	-13.4	0	0	1	0	0
33	-13.2	0	0	1	0	0
34	-13	0	0	1	0	0
35	-12.8	0	0	1	0	0
36	-12.6	0	0	1	0	0
37	-12.4	0	0	1	0	0
38	-12.2	0	0	1	0	0
39	-12	0	0	1	0	0
40	-11.8	0	0	1	0	0
41	-11.6	0	0	1	0	0
42	-11.4	0	0	1	0	0
43	-11.2	0	0	1	0	0
44	-11	0	0	1	0	0
45	-10.8	0	0	1	0	0
46	-10.6	0	0	1	0	0
47	-10.4	0	0	1	0	0
48	-10.2	0	0	1	0	0
49	-10	0	0	1	0	0
50	-9.8	0	0	1	0	0
51	-9.6	0	0	1	0	0
52	-9.4	0	0	1	0	0
53	-9.2	0	0	1	0	0
54	-9	0	0	1	0	0
55	-8.8	289.75	4e-09	1	0	4
56	-8.6	290.17	6e-09	1	0	6
57	-8.4	292.82	1.7e-08	0.99999999	0	17
58	-8.2	294.65	2.6e-08	0.99999997	0	26
59	-8	296.76	5.9e-08	0.99999995	0	59
60	-7.8	299.26	1.08e-07	0.99999989	0	108
61	-7.6	301.21	2.21e-07	0.99999978	0	221
62	-7.4	303.1	4.55e-07	0.99999956	0	455
63	-7.2	304.72	8.42e-07	0.9999991	0	842
64	-7	307.1	1.6e-06	0.99999826	0	1600
65	-6.8	308.8	2.882e-06	0.99999666	0	2882
66	-6.6	310.56	5.262e-06	0.99999378	0	5262
67	-6.4	312.47	9.23e-06	0.99998852	0	9230
68	-6.2	314.46	1.5997e-05	0.99997929	0	15997
69	-6	316.41	2.7365e-05	0.99996329	0	27365
70	-5.8	318.26	4.576e-05	0.99993593	0	45760
71	-5.6	320.2	7.4868e-05	0.99989017	0	74868
72	-5.4	322.1	0.000120832	0.9998153	0	120832
73	-5.2	324	0.000190735	0.99969447	0	190735
74	-5	325.91	0.000295398	0.99950373	0	295398
75	-4.8	327.79	0.000451279	0.99920833	0	451279
76	-4.6	329.7	0.000674548	0.99875705	0	674548
77	-4.4	331.6	0.000986487	0.99808251	0	986487
78	-4.2	333.5	0.001425738	0.99709602	0	1425738
79	-4	335.41	0.002016995	0.99567028	0	2016995
80	-3.8	337.3	0.002806643	0.99365329	0	2806643
81	-3.6	339.2	0.003830559	0.99084664	0	3830559
82	-3.4	341.1	0.005133592	0.98701608	0	5133592
83	-3.2	342.99	0.006765488	0.98188249	0	6765488
84	-3	344.89	0.00875542	0.975117	0	8755420
85	-2.8	346.79	0.011125719	0.96636158	0	11125719
86	-2.6	348.68	0.013903978	0.95523587	0	13903978
87	-2.4	350.58	0.017052079	0.94133189	0	17052079
88	-2.2	352.47	0.020574187	0.92427981	0	20574187
89	-2	354.37	0.02438	0.90370562	0	24380000
90	-1.8	356.26	0.028391369	0.87932562	0	28391369
91	-1.6	358.15	0.032505902	0.85093425	0	32505902
92	-1.4	360.05	0.036571707	0.81842835	0	36571707
93	-1.2	361.94	0.040424151	0.78185664	0	40424151
94	-1	363.83	0.043955286	0.74143249	0	43955286
95	-0.8	365.72	0.046970724	0.69747721	0	46970724
96	-0.6	367.61	0.049350003	0.65050648	0	49350003
97	-0.4	369.5	0.050972121	0.60115648	0	50972121
98	-0.2	371.39	0.051745913	0.55018436	0	51745913
99	0	373.28	0.051681805	0.49843845	0	51681805
100	0.2	375.17	0.05074013	0.44675664	1.8895	50740130
101	0.4	377.05	0.048983351	0.39601651	3.7773	48983351
102	0.6	378.94	0.046513733	0.34703316	5.6658	46513733
103	0.8	380.83	0.043421937	0.30051943	7.5524	43421937
104	1	382.72	0.039868528	0.25709749	9.4402	39868528
105	1.2	384.6	0.036015272	0.21722896	11.327	36015272
106	1.4	386.49	0.031990496	0.18121369	13.213	31990496
107	1.6	388.37	0.027959139	0.14922319	15.098	27959139
108	1.8	390.26	0.024025028	0.12126405	16.985	24025028
109	2	392.15	0.020320316	0.097239026	18.871	20320316
110	2.2	394.03	0.016896895	0.07691871	20.754	16896895
111	2.4	395.92	0.013839514	0.060021815	22.64	13839514
112	2.6	397.8	0.011140362	0.046182301	24.525	11140362
113	2.8	399.68	0.008834509	0.035041939	26.406	8834509
114	3	401.57	0.006874911	0.02620743	28.289	6874911
115	3.2	403.45	0.005278344	0.019332519	30.175	5278344
116	3.4	405.33	0.003983166	0.014054175	32.055	3983166
117	3.6	407.21	0.00296024	0.010071009	33.937	2960240
118	3.8	409.1	0.002160293	0.007110769	35.821	2160293
119	4	410.98	0.001554523	0.004950476	37.701	1554523
120	4.2	412.87	0.001101082	0.003395953	39.592	1101082
121	4.4	414.75	0.000766458	0.002294871	41.471	766458
122	4.6	416.63	0.000524877	0.001528413	43.351	524877
123	4.8	418.52	0.000354336	0.001003536	45.245	354336
124	5	420.4	0.000235074	0.0006492	47.127	235074
125	5.2	422.27	0.000153995	0.000414126	48.994	153995
126	5.4	424.14	9.9475e-05	0.000260131	50.865	99475
127	5.6	426.07	6.2641e-05	0.000160656	52.797	62641
128	5.8	427.89	3.9058e-05	9.8015e-05	54.616	39058
129	6	429.82	2.4068e-05	5.8957e-05	56.544	24068
130	6.2	431.7	1.4588e-05	3.4889e-05	58.42	14588
131	6.4	433.48	8.754e-06	2.0301e-05	60.204	8754
132	6.6	435.39	5.048e-06	1.1547e-05	62.113	5048
133	6.8	437.3	2.958e-06	6.499e-06	64.028	2958
134	7	439.21	1.589e-06	3.541e-06	65.933	1589
135	7.2	441.16	8.93e-07	1.952e-06	67.886	893
136	7.4	442.67	4.58e-07	1.059e-06	69.394	458
137	7.6	444.79	2.81e-07	6.01e-07	71.513	281
138	7.8	446.49	1.48e-07	3.2e-07	73.21	148
139	8	448	7.7e-08	1.72e-07	74.723	77
140	8.2	451.05	4.4e-08	9.5e-08	77.769	44
141	8.4	451.52	2.5e-08	5.1e-08	78.243	25
142	8.6	456.47	1.7e-08	2.6e-08	83.194	17
143	8.8	451.4	5e-09	9e-09	78.123	5
144	9	457.33	3e-09	4e-09	84.057	3
145	9.2	0	0	1e-09	0	0
146	9.4	0	0	1e-09	0	0
147	9.6	0	0	1e-09	0	0
148	9.8	471	1e-09	1e-09	97.723	1
149	10	0	0	0	0	0
150	10.2	0	0	0	0	0
151	10.4	0	0	0	0	0
152	10.6	0	0	0	0	0
153	10.8	0	0	0	0	0
154	11	0	0	0	0	0
155	11.2	0	0	0	0	0
156	11.4	0	0	0	0	0
157	11.6	0	0	0	0	0
158	11.8	0	0	0	0	0
159	12	0	0	0	0	0
160	12.2	0	0	0	0	0
161	12.4	0	0	0	0	0
162	12.6	0	0	0	0	0
163	12.8	0	0	0	0	0
164	13	0	0	0	0	0
165	13.2	0	0	0	0	0
166	13.4	0	0	0	0	0
167	13.6	0	0	0	0	0
168	13.8	0	0	0	0	0
169	14	0	0	0	0	0
170	14.2	0	0	0	0	0
171	14.4	0	0	0	0	0
172	14.6	0	0	0	0	0
173	14.8	0	0	0	0	0
174	15	0	0	0	0	0
175	15.2	0	0	0	0	0
176	15.4	0	0	0	0	0
177	15.6	0	0	0	0	0
178	15.8	0	0	0	0	0
179	16	0	0	0	0	0
180	16.2	0	0	0	0	0
181	16.4	0	0	0	0	0
182	16.6	0	0	0	0	0
183	16.8	0	0	0	0	0
184	17	0	0	0	0	0
185	17.2	0	0	0	0	0
186	17.4	0	0	0	0	0
187	17.6	0	0	0	0	0
188	17.8	0	0	0	0	0
189	18	0	0	0	0	0
190	18.2	0	0	0	0	0
191	18.4	0	0	0	0	0
192	18.6	0	0	0	0	0
193	18.8	0	0	0	0	0
194	19	0	0	0	0	0
195	19.2	0	0	0	0	0
196	19.4	0	0	0	0	0
197	19.6	0	0	0	0	0
198	19.8	0	0	0	0	0
199	20	0	0	0	0	0
