# Supplementary material for: Quantifying the Potential for Future Gene Therapy to Lower Lifetime Risk of Polygenic Late-Onset Diseases
Source: MDPI journal article supplement (doi:10.3390/ijms20133352), 2019-07-08
Supplement: s2 [file s2 › SuppFiles/Results/LODsCommonLow/Stroke/1.000/FrailtyAnalysis.csv]

Age	Heritability	MeanOR	CaseOR	nControls	nCases	nCumIncidence	nIncidence	nLifeIncidence0	nAbsIncidence0	nLifeIncidence5	nAbsIncidence5	nLifeIncidence10	nAbsIncidence10	nLifeIncidence15	nAbsIncidence15	nIncActDivExp
39	0.418285	0.999987	11.0171	999965228	34772	3.4772e-05	3.4772e-05	3.37647e-05	3.37647e-05	3.399e-05	3.399e-05	3.4175e-05	3.4175e-05	3.43354e-05	3.43354e-05	1.01415
40	0.418241	0.999813	10.948	999892440	72788	0.00010756	7.27905e-05	0.000104335	7.05701e-05	0.000105055	7.10647e-05	0.000105641	7.14658e-05	0.000106146	7.18101e-05	0.997568
41	0.418171	0.999532	10.9767	999775416	117024	0.000224584	0.000117037	0.000217609	0.000113274	0.000219164	0.00011411	0.000220418	0.000114778	0.000221492	0.000115346	1.00418
42	0.418073	0.999136	10.9705	999609827	165589	0.000390173	0.000165626	0.000377615	0.000160006	0.000380416	0.000161252	0.000382653	0.000162234	0.000384555	0.000163063	0.999907
43	0.417944	0.998611	10.7936	999389106	220721	0.000610894	0.000220807	0.0005905	0.000212885	0.000595058	0.000214641	0.00059866	0.000216008	0.000601699	0.000217144	0.999471
44	0.41778	0.997941	10.6943	999106562	282544	0.000893438	0.000282717	0.000862474	0.000271974	0.000869416	0.000274359	0.00087485	0.00027619	0.000879392	0.000277693	0.99844
45	0.417577	0.997107	10.5649	998752604	353958	0.0012474	0.000354275	0.00120246	0.000339984	0.00121259	0.000343173	0.00122043	0.000345578	0.00122692	0.000347528	1.00306
46	0.417332	0.996093	10.4656	998320363	432241	0.00167964	0.000432781	0.00161666	0.000414204	0.00163098	0.00041839	0.0016419	0.000421476	0.00165086	0.000423944	1.00185
47	0.417041	0.994881	10.3264	997801081	519282	0.00219892	0.000520156	0.002113	0.000496343	0.00213275	0.000501774	0.00214759	0.000505682	0.00215963	0.000508761	0.99921
48	0.416698	0.993447	10.1795	997182369	618712	0.00281763	0.000620075	0.00270274	0.000589732	0.0027295	0.000596748	0.00274926	0.00060167	0.00276513	0.000605499	0.999919
49	0.416302	0.991766	10.0026	996451784	730585	0.00354822	0.000732649	0.00339697	0.000694231	0.00343276	0.000703254	0.00345868	0.00070942	0.00347928	0.000714154	1.00095
50	0.415843	0.989814	9.86831	995597909	853875	0.00440209	0.000856916	0.00420562	0.000808654	0.00425292	0.000820164	0.00428653	0.000827857	0.00431294	0.00083366	0.999342
51	0.41532	0.987562	9.66968	994603882	994027	0.00539612	0.000998422	0.00514352	0.000937899	0.00520547	0.000952546	0.00524871	0.000962173	0.00528221	0.000969271	1.00014
52	0.414727	0.984981	9.45004	993453115	1150767	0.00654688	0.00115701	0.00622488	0.00108136	0.0063054	0.00109993	0.00636068	0.00111197	0.00640284	0.00112063	1.00078
53	0.414059	0.982044	9.22465	992128664	1324451	0.00787134	0.00133318	0.00746389	0.00123901	0.00756781	0.00126241	0.00763811	0.00127743	0.00769081	0.00128797	1.00026
54	0.413308	0.978712	9.01987	990610470	1518194	0.00938953	0.00153024	0.00887722	0.00141333	0.00901046	0.00144265	0.00909951	0.0014614	0.00916502	0.00147421	0.999798
55	0.41247	0.974953	8.78271	988876181	1734289	0.0111238	0.00175073	0.0104831	0.00160593	0.0106529	0.00164244	0.0107653	0.00166582	0.0108465	0.00168145	0.999568
56	0.411533	0.970714	8.5721	986897934	1978247	0.0131021	0.0020005	0.0123044	0.00182126	0.0125194	0.00186655	0.012661	0.00189569	0.0127613	0.00191485	1.00122
57	0.410497	0.965976	8.32286	984655921	2242013	0.0153441	0.00227178	0.0143556	0.0020512	0.0146262	0.00210679	0.014804	0.00214297	0.0149277	0.00216642	0.999513
58	0.409352	0.960683	8.07102	982113718	2542203	0.0178863	0.00258182	0.0166657	0.00231007	0.0170044	0.00237821	0.0172271	0.00242313	0.0173797	0.00245195	1.00121
59	0.408092	0.954802	7.82643	979247449	2866269	0.0207526	0.00291847	0.0192512	0.0025855	0.0196727	0.0026683	0.0199508	0.00272364	0.0201387	0.00275904	1.00001
60	0.406713	0.948292	7.56443	976020899	3226550	0.0239791	0.00329493	0.0221389	0.00288773	0.0226605	0.00298774	0.0230064	0.00305567	0.0232379	0.00309917	0.999947
61	0.405205	0.941104	7.29727	972394986	3625913	0.027605	0.003715	0.0253569	0.00321802	0.0259986	0.00333818	0.0264276	0.00342118	0.0267125	0.0034746	1.00085
62	0.403564	0.9332	7.03266	968334510	4060476	0.0316655	0.00417575	0.0289284	0.00357145	0.0297135	0.00371489	0.0302432	0.00381557	0.0305936	0.0038811	1.00093
63	0.401784	0.924554	6.76882	963806906	4527604	0.0361931	0.00467566	0.0328724	0.00394404	0.0338277	0.00411419	0.0344787	0.00423553	0.0349091	0.00431553	0.999434
64	0.399857	0.9151	6.50569	958756245	5050661	0.0412438	0.00524032	0.0372268	0.00435438	0.0383836	0.00455592	0.0391805	0.00470181	0.0397085	0.00479934	1.00115
65	0.397782	0.904832	6.23607	953151990	5604255	0.046848	0.00584534	0.0420052	0.00477838	0.0433994	0.00501575	0.04437	0.00518946	0.0450159	0.00530745	1.00045
66	0.395549	0.893706	5.98128	946948534	6203456	0.0530515	0.00650836	0.047232	0.00522685	0.048905	0.0055056	0.0500812	0.00571118	0.0508691	0.00585318	1.00031
67	0.39316	0.881714	5.71213	940102148	6846386	0.0598979	0.00722995	0.0529273	0.00569527	0.0549268	0.00602184	0.0563448	0.00626369	0.0573026	0.00643345	1.00036
68	0.390612	0.868839	5.45656	932576024	7526124	0.067424	0.00800564	0.0591021	0.00617485	0.0614829	0.00655608	0.0631838	0.00683891	0.0643432	0.00704061	0.999758
69	0.387902	0.855076	5.19653	924324308	8251716	0.0756757	0.0088483	0.0657717	0.00666953	0.0685971	0.00711413	0.0706272	0.00744342	0.0720249	0.00768177	1.00001
70	0.385035	0.840438	4.94355	915316447	9007861	0.0846836	0.00974535	0.0729348	0.00716314	0.0762775	0.00768042	0.0786891	0.00806195	0.0803661	0.00834114	0.999559
71	0.382003	0.824921	4.69808	905511107	9805340	0.0944889	0.0107125	0.080595	0.00766018	0.0845392	0.00826169	0.0873914	0.00870229	0.0893933	0.00902724	1.00011
72	0.378816	0.808566	4.45686	894888077	10623030	0.105112	0.0117315	0.0887341	0.0081391	0.0933761	0.00883693	0.0967351	0.00934365	0.0991122	0.0097189	0.999971
73	0.375476	0.79141	4.2241	883428472	11459605	0.116572	0.0128056	0.0973285	0.00859442	0.102778	0.00940209	0.106718	0.00998258	0.109525	0.0104132	0.999773
74	0.371984	0.773482	3.99962	871108252	12320220	0.128892	0.0139459	0.106354	0.00902585	0.112736	0.00995794	0.117339	0.0106218	0.120639	0.0111134	1.0006
75	0.368352	0.754873	3.78067	857940990	13167262	0.142059	0.0151155	0.115757	0.00940228	0.123207	0.0104707	0.128566	0.0112269	0.132423	0.0117846	1.00009
76	0.364592	0.735659	3.5658	843926804	14014186	0.156073	0.0163347	0.125487	0.00973061	0.134155	0.0109482	0.140374	0.0118079	0.144861	0.0124377	1.00016
77	0.360709	0.715906	3.36439	829083166	14843638	0.170917	0.0175888	0.135481	0.009994	0.145528	0.0113728	0.152722	0.0123479	0.157917	0.0130559	1.00027
78	0.356714	0.695711	3.1691	813436771	15646395	0.186563	0.0188719	0.145664	0.0101823	0.157262	0.0117344	0.165559	0.0128372	0.171547	0.0136297	1.00051
79	0.352625	0.675175	2.98211	797028664	16408107	0.202971	0.0201713	0.155947	0.0102839	0.169283	0.0120207	0.178821	0.013262	0.185693	0.0141461	1.00067
80	0.348456	0.654405	2.805	779918055	17110609	0.220082	0.021468	0.166235	0.0102874	0.181501	0.0122181	0.192428	0.0136065	0.200282	0.0145891	1.00031
81	0.34422	0.633504	2.63597	762161098	17756957	0.237839	0.0227677	0.17643	0.0101956	0.19383	0.0123294	0.2063	0.0138722	0.215243	0.0149615	1.00019
82	0.339924	0.612553	2.47768	743818985	18342113	0.256181	0.0240659	0.186436	0.0100055	0.20618	0.0123495	0.220353	0.0140533	0.230502	0.0152582	1.00048
83	0.335588	0.591665	2.32664	724971582	18847403	0.275028	0.0253387	0.196146	0.00970971	0.218445	0.0122654	0.234488	0.0141351	0.245965	0.0154634	1.00053
84	0.331238	0.570952	2.18291	705707857	19263725	0.294292	0.0265717	0.205457	0.00931151	0.230519	0.0120737	0.248601	0.0141127	0.261535	0.0155701	1.00016
85	0.326874	0.550469	2.04932	686094394	19613463	0.313906	0.0277926	0.214289	0.00883204	0.242311	0.0117922	0.262606	0.0140053	0.277132	0.0155968	1.00071
86	0.322522	0.530325	1.92283	666236711	19857683	0.333763	0.0289431	0.222554	0.00826457	0.253713	0.0114018	0.276394	0.013788	0.292645	0.0155133	1.00028
87	0.318188	0.510576	1.8048	646211477	20025234	0.353789	0.0300572	0.230188	0.00763432	0.264637	0.0109237	0.289877	0.0134827	0.307988	0.0153428	1.00031
88	0.313883	0.491274	1.69417	626094880	20116597	0.373905	0.0311301	0.237142	0.0069537	0.275	0.0103636	0.302968	0.0130914	0.323075	0.0150869	1.00073
89	0.309624	0.472488	1.59054	605983909	20110971	0.394016	0.0321213	0.243372	0.00623028	0.284721	0.00972104	0.315573	0.0126048	0.337808	0.0147334	1.00037
90	0.30542	0.454253	1.49417	585953498	20030411	0.414047	0.0330544	0.248861	0.00548843	0.293741	0.00901979	0.327616	0.0120429	0.352111	0.014303	1.00006
91	0.301281	0.436608	1.40346	566071126	19882372	0.433929	0.0339317	0.253608	0.00474761	0.302016	0.00827484	0.339032	0.011416	0.365917	0.0138051	0.999918
92	0.297211	0.419565	1.3197	546402843	19668283	0.453597	0.0347453	0.257634	0.004026	0.309514	0.00749824	0.349761	0.010729	0.379159	0.0132424	0.999693
93	0.293215	0.403133	1.24175	526998068	19404775	0.473002	0.0355137	0.260978	0.00334383	0.316222	0.00670765	0.359758	0.00999685	0.391787	0.0126281	0.999898
94	0.289298	0.387316	1.16904	507904713	19093355	0.492095	0.0362304	0.263693	0.00271527	0.322137	0.00591503	0.368987	0.00922916	0.403754	0.011967	1.00029
95	0.285477	0.372138	1.10058	489179388	18725325	0.510821	0.0368678	0.265844	0.00215088	0.327268	0.00513083	0.377419	0.00843211	0.415012	0.0112582	1.00005
96	0.281735	0.357575	1.03822	470858574	18320814	0.529141	0.0374521	0.267505	0.0016606	0.331642	0.00437474	0.385044	0.00762494	0.425532	0.0105194	0.99986
97	0.278084	0.343619	0.979353	452960575	17897999	0.547039	0.0380114	0.268755	0.00125	0.335306	0.00366363	0.391867	0.00682334	0.435295	0.00976327	1.00037
98	0.27452	0.330257	0.925086	435518803	17441772	0.564481	0.0385062	0.269671	0.000916391	0.338312	0.00300557	0.397896	0.0060291	0.44428	0.00898556	1.00045
99	0.271055	0.317485	0.874117	418558649	16960154	0.581441	0.0389424	0.270326	0.000654577	0.340724	0.0024119	0.403151	0.00525417	0.452478	0.00819803	1.0002
100	0.267673	0.305272	0.827205	402088355	16470294	0.597912	0.03935	0.270782	0.000456474	0.342615	0.00189186	0.407664	0.00451294	0.459895	0.00741666	1.00029
101	0.264387	0.293607	0.782944	386115193	15973162	0.613885	0.0397255	0.271093	0.000310997	0.344063	0.00144781	0.411478	0.00381415	0.466543	0.00664787	1.00056
102	0.261188	0.282471	0.741747	370652074	15463119	0.629348	0.0400479	0.2713	0.000206665	0.345143	0.00107994	0.414643	0.00316522	0.472438	0.00589508	1.0004
103	0.258078	0.27184	0.703454	355696916	14955158	0.644303	0.0403482	0.271434	0.000133699	0.345929	0.000785744	0.41722	0.00257707	0.477608	0.00516955	1.00051
104	0.255058	0.261699	0.667481	341254291	14442625	0.658746	0.0406037	0.271518	8.39839e-05	0.346486	0.000557413	0.419274	0.00205389	0.482082	0.00447425	1.00026
105	0.252115	0.252016	0.634316	327314552	13939739	0.672685	0.0408485	0.271569	5.11588e-05	0.346873	0.00038634	0.420875	0.00160119	0.485901	0.00381956	1.00042
106	0.249256	0.242778	0.603164	313882872	13431680	0.686117	0.041036	0.271599	3.0087e-05	0.347134	0.000261515	0.422092	0.00121745	0.489109	0.00320728	0.999786
107	0.246481	0.233961	0.573719	300938318	12944554	0.699062	0.0412401	0.271616	1.70221e-05	0.347307	0.000173004	0.422997	0.000904048	0.491758	0.00264969	1.00011
108	0.243781	0.225541	0.546499	288475520	12462798	0.711524	0.0414131	0.271625	9.28478e-06	0.347419	0.000111417	0.423651	0.000654795	0.493906	0.00214759	1.00017
109	0.241164	0.217503	0.520641	276481886	11993634	0.723518	0.0415759	0.27163	4.79745e-06	0.347488	6.9743e-05	0.424114	0.000462894	0.495612	0.00170561	1.00042
110	0.238613	0.209829	0.496567	264953021	11528865	0.735047	0.0416984	0.271632	2.36342e-06	0.347531	4.23109e-05	0.424434	0.000319522	0.496936	0.00132426	1.0001
111	0.236137	0.202495	0.473962	253868054	11084967	0.746132	0.0418375	0.271633	1.1085e-06	0.347555	2.48303e-05	0.42465	0.000215824	0.497941	0.00100474	1.00053
112	0.233725	0.195485	0.452922	243223789	10644265	0.756776	0.0419283	0.271634	4.78992e-07	0.347569	1.39972e-05	0.424792	0.000142261	0.498684	0.000743395	1.00013
113	0.231373	0.188786	0.432899	233004576	10219213	0.766995	0.0420157	0.271634	2.04384e-07	0.347577	7.61331e-06	0.424883	9.13598e-05	0.499221	0.000536917	0.999921
114	0.229083	0.182381	0.414159	223197666	9806910	0.776802	0.0420889	0.271634	4.90346e-08	0.347581	3.92276e-06	0.42494	5.70272e-05	0.499599	0.000378498	0.999633
115	0.226861	0.176261	0.396148	213790412	9407254	0.78621	0.0421476	0.271634	0	0.347583	1.92849e-06	0.424975	3.45246e-05	0.49986	0.000260722	0.999226
116	0.224694	0.1704	0.379424	204758915	9031497	0.795241	0.0422446	0.271634	0	0.347584	9.0315e-07	0.424995	2.02306e-05	0.500036	0.000175843	0.999926
117	0.222585	0.164788	0.36364	196095494	8663421	0.803905	0.0423103	0.271634	0	0.347584	3.89854e-07	0.425006	1.13924e-05	0.500152	0.000115787	1.00006
118	0.220527	0.159412	0.348713	187786815	8308679	0.812213	0.0423706	0.271634	0	0.347584	1.66174e-07	0.425013	6.18997e-06	0.500226	7.42796e-05	1.00023
119	0.218523	0.154265	0.334706	179829099	7957716	0.820171	0.0423763	0.271634	0	0.347584	3.97886e-08	0.425016	3.18309e-06	0.500272	4.62741e-05	0.999247
120	0.216571	0.149331	0.321223	172198721	7630378	0.827801	0.0424313	0.271634	0	0.347584	0	0.425017	1.56423e-06	0.5003	2.80035e-05	0.999554
