# Supplementary material for: Quantifying the Potential for Future Gene Therapy to Lower Lifetime Risk of Polygenic Late-Onset Diseases
Source: MDPI journal article supplement (doi:10.3390/ijms20133352), 2019-07-08
Supplement: s2 [file s2 › SuppFiles/Results/LODsCommonLow/Stroke/1.000/IndividualsByBetaDistrib.csv]

nEntry	Beta	nDetrimentalCount	nFractionPopulation	nCumulativeFractionPopulation	nEditsNeeded	nIndividuals
0	-19.8	0	0	1	0	0
1	-19.6	0	0	1	0	0
2	-19.4	0	0	1	0	0
3	-19.2	0	0	1	0	0
4	-19	0	0	1	0	0
5	-18.8	0	0	1	0	0
6	-18.6	0	0	1	0	0
7	-18.4	0	0	1	0	0
8	-18.2	0	0	1	0	0
9	-18	0	0	1	0	0
10	-17.8	0	0	1	0	0
11	-17.6	0	0	1	0	0
12	-17.4	0	0	1	0	0
13	-17.2	0	0	1	0	0
14	-17	0	0	1	0	0
15	-16.8	0	0	1	0	0
16	-16.6	0	0	1	0	0
17	-16.4	0	0	1	0	0
18	-16.2	0	0	1	0	0
19	-16	0	0	1	0	0
20	-15.8	0	0	1	0	0
21	-15.6	0	0	1	0	0
22	-15.4	0	0	1	0	0
23	-15.2	0	0	1	0	0
24	-15	0	0	1	0	0
25	-14.8	0	0	1	0	0
26	-14.6	0	0	1	0	0
27	-14.4	0	0	1	0	0
28	-14.2	0	0	1	0	0
29	-14	0	0	1	0	0
30	-13.8	0	0	1	0	0
31	-13.6	0	0	1	0	0
32	-13.4	0	0	1	0	0
33	-13.2	0	0	1	0	0
34	-13	0	0	1	0	0
35	-12.8	0	0	1	0	0
36	-12.6	0	0	1	0	0
37	-12.4	0	0	1	0	0
38	-12.2	0	0	1	0	0
39	-12	0	0	1	0	0
40	-11.8	0	0	1	0	0
41	-11.6	0	0	1	0	0
42	-11.4	0	0	1	0	0
43	-11.2	0	0	1	0	0
44	-11	0	0	1	0	0
45	-10.8	0	0	1	0	0
46	-10.6	0	0	1	0	0
47	-10.4	0	0	1	0	0
48	-10.2	0	0	1	0	0
49	-10	0	0	1	0	0
50	-9.8	0	0	1	0	0
51	-9.6	0	0	1	0	0
52	-9.4	0	0	1	0	0
53	-9.2	278	1e-09	1	0	1
54	-9	285	1e-09	1	0	1
55	-8.8	0	0	1	0	0
56	-8.6	289.4	5e-09	1	0	5
57	-8.4	294.33	9e-09	0.99999999	0	9
58	-8.2	296.48	2.1e-08	0.99999998	0	21
59	-8	297.15	6.8e-08	0.99999996	0	68
60	-7.8	298.99	1.06e-07	0.99999989	0	106
61	-7.6	301.59	2.29e-07	0.99999979	0	229
62	-7.4	302.76	4.06e-07	0.99999956	0	406
63	-7.2	304.92	8.41e-07	0.99999915	0	841
64	-7	307.01	1.604e-06	0.99999831	0	1604
65	-6.8	308.8	2.959e-06	0.99999671	0	2959
66	-6.6	310.61	5.244e-06	0.99999375	0	5244
67	-6.4	312.66	9.295e-06	0.99998851	0	9295
68	-6.2	314.48	1.5932e-05	0.99997921	0	15932
69	-6	316.37	2.7165e-05	0.99996328	0	27165
70	-5.8	318.28	4.5911e-05	0.99993611	0	45911
71	-5.6	320.19	7.5072e-05	0.9998902	0	75072
72	-5.4	322.1	0.000120285	0.99981513	0	120285
73	-5.2	323.99	0.00019026	0.99969485	0	190260
74	-5	325.91	0.000295979	0.99950459	0	295979
75	-4.8	327.8	0.000450236	0.99920861	0	450236
76	-4.6	329.69	0.000675017	0.99875837	0	675017
77	-4.4	331.6	0.000988463	0.99808335	0	988463
78	-4.2	333.5	0.001426563	0.99709489	0	1426563
79	-4	335.4	0.002016325	0.99566833	0	2016325
80	-3.8	337.3	0.002805145	0.993652	0	2805145
81	-3.6	339.2	0.003829598	0.99084686	0	3829598
82	-3.4	341.1	0.005133439	0.98701726	0	5133439
83	-3.2	342.99	0.006763111	0.98188382	0	6763111
84	-3	344.89	0.008755523	0.97512071	0	8755523
85	-2.8	346.79	0.011139076	0.96636519	0	11139076
86	-2.6	348.68	0.013896316	0.95522611	0	13896316
87	-2.4	350.58	0.017056115	0.9413298	0	17056115
88	-2.2	352.47	0.020569314	0.92427368	0	20569314
89	-2	354.37	0.024379229	0.90370437	0	24379229
90	-1.8	356.26	0.028398985	0.87932514	0	28398985
91	-1.6	358.15	0.032500669	0.85092615	0	32500669
92	-1.4	360.04	0.036562853	0.81842548	0	36562853
93	-1.2	361.94	0.040434315	0.78186263	0	40434315
94	-1	363.83	0.043948999	0.74142831	0	43948999
95	-0.8	365.72	0.046972179	0.69747932	0	46972179
96	-0.6	367.61	0.049349579	0.65050714	0	49349579
97	-0.4	369.5	0.050962481	0.60115756	0	50962481
98	-0.2	371.39	0.051753228	0.55019508	0	51753228
99	0	373.28	0.051675778	0.49844185	0	51675778
100	0.2	375.17	0.050737666	0.44676607	1.8904	50737666
101	0.4	377.05	0.048983593	0.3960284	3.778	48983593
102	0.6	378.94	0.046513154	0.34704481	5.6651	46513154
103	0.8	380.83	0.043420261	0.30053166	7.5538	43420261
104	1	382.72	0.039869337	0.2571114	9.4412	39869337
105	1.2	384.6	0.036008881	0.21724206	11.327	36008881
106	1.4	386.49	0.032000976	0.18123318	13.214	32000976
107	1.6	388.37	0.027956278	0.1492322	15.098	27956278
108	1.8	390.26	0.024030971	0.12127593	16.986	24030971
109	2	392.15	0.020322311	0.097244954	18.873	20322311
110	2.2	394.03	0.016901422	0.076922643	20.756	16901422
111	2.4	395.92	0.013837127	0.060021221	22.641	13837127
112	2.6	397.8	0.011141103	0.046184094	24.525	11141103
113	2.8	399.69	0.00882846	0.035042991	26.41	8828460
114	3	401.57	0.006880438	0.026214531	28.294	6880438
115	3.2	403.45	0.005274014	0.019334093	30.175	5274014
116	3.4	405.34	0.003984887	0.014060079	32.06	3984887
117	3.6	407.22	0.002956319	0.010075192	33.942	2956319
118	3.8	409.1	0.002163526	0.007118873	35.825	2163526
119	4	410.98	0.00155515	0.004955347	37.702	1555150
120	4.2	412.86	0.001101364	0.003400197	39.588	1101364
121	4.4	414.76	0.000767477	0.002298833	41.479	767477
122	4.6	416.63	0.000525247	0.001531356	43.351	525247
123	4.8	418.51	0.000354614	0.001006109	45.237	354614
124	5	420.41	0.000235926	0.000651495	47.131	235926
125	5.2	422.28	0.000154955	0.000415569	49	154955
126	5.4	424.19	9.949e-05	0.000260614	50.91	99490
127	5.6	426.02	6.3274e-05	0.000161124	52.745	63274
128	5.8	427.9	3.8959e-05	9.785e-05	54.621	38959
129	6	429.83	2.4163e-05	5.8891e-05	56.55	24163
130	6.2	431.59	1.4632e-05	3.4728e-05	58.316	14632
131	6.4	433.58	8.483e-06	2.0096e-05	60.303	8483
132	6.6	435.39	5.087e-06	1.1613e-05	62.115	5087
133	6.8	437.35	2.903e-06	6.526e-06	64.073	2903
134	7	439.19	1.6e-06	3.623e-06	65.911	1600
135	7.2	441.28	9.7e-07	2.023e-06	68.001	970
136	7.4	442.78	4.94e-07	1.053e-06	69.499	494
137	7.6	444.38	2.82e-07	5.59e-07	71.107	282
138	7.8	447.04	1.25e-07	2.77e-07	73.764	125
139	8	448.04	7.9e-08	1.52e-07	74.762	79
140	8.2	452.03	3.2e-08	7.3e-08	78.755	32
141	8.4	451.65	3.1e-08	4.1e-08	78.369	31
142	8.6	453	7e-09	1e-08	79.724	7
143	8.8	462	1e-09	3e-09	88.724	1
144	9	460	1e-09	2e-09	86.724	1
145	9.2	0	0	1e-09	0	0
146	9.4	458	1e-09	1e-09	84.724	1
147	9.6	0	0	0	0	0
148	9.8	0	0	0	0	0
149	10	0	0	0	0	0
150	10.2	0	0	0	0	0
151	10.4	0	0	0	0	0
152	10.6	0	0	0	0	0
153	10.8	0	0	0	0	0
154	11	0	0	0	0	0
155	11.2	0	0	0	0	0
156	11.4	0	0	0	0	0
157	11.6	0	0	0	0	0
158	11.8	0	0	0	0	0
159	12	0	0	0	0	0
160	12.2	0	0	0	0	0
161	12.4	0	0	0	0	0
162	12.6	0	0	0	0	0
163	12.8	0	0	0	0	0
164	13	0	0	0	0	0
165	13.2	0	0	0	0	0
166	13.4	0	0	0	0	0
167	13.6	0	0	0	0	0
168	13.8	0	0	0	0	0
169	14	0	0	0	0	0
170	14.2	0	0	0	0	0
171	14.4	0	0	0	0	0
172	14.6	0	0	0	0	0
173	14.8	0	0	0	0	0
174	15	0	0	0	0	0
175	15.2	0	0	0	0	0
176	15.4	0	0	0	0	0
177	15.6	0	0	0	0	0
178	15.8	0	0	0	0	0
179	16	0	0	0	0	0
180	16.2	0	0	0	0	0
181	16.4	0	0	0	0	0
182	16.6	0	0	0	0	0
183	16.8	0	0	0	0	0
184	17	0	0	0	0	0
185	17.2	0	0	0	0	0
186	17.4	0	0	0	0	0
187	17.6	0	0	0	0	0
188	17.8	0	0	0	0	0
189	18	0	0	0	0	0
190	18.2	0	0	0	0	0
191	18.4	0	0	0	0	0
192	18.6	0	0	0	0	0
193	18.8	0	0	0	0	0
194	19	0	0	0	0	0
195	19.2	0	0	0	0	0
196	19.4	0	0	0	0	0
197	19.6	0	0	0	0	0
198	19.8	0	0	0	0	0
199	20	0	0	0	0	0
