# Supplementary material for: Quantifying the Potential for Future Gene Therapy to Lower Lifetime Risk of Polygenic Late-Onset Diseases
Source: MDPI journal article supplement (doi:10.3390/ijms20133352), 2019-07-08
Supplement: s2 [file s2 › SuppFiles/Results/LODsCommonLow/Stroke/1.000/ScatterData.csv]

Age	OR	Beta
40	39.604	3.6789
42	0.58073	-0.54346
43	0.68878	-0.37283
43	14.073	2.6443
44	15.136	2.7171
44	8.675	2.1604
45	8.7025	2.1636
46	2.2789	0.82371
46	7.9972	2.0791
46	117.26	4.7644
46	1.8113	0.59406
46	49.514	3.9023
47	81.415	4.3996
47	0.17705	-1.7313
47	5.2412	1.6565
47	11.903	2.4768
47	6.8637	1.9262
47	8.9979	2.197
47	10.393	2.3412
48	68.539	4.2274
48	50.442	3.9208
48	0.63742	-0.45032
48	25.585	3.242
48	211.08	5.3522
49	101.47	4.6197
49	3.4885	1.2495
49	2.0691	0.72712
49	3.6592	1.2972
49	3.8861	1.3574
49	1.0145	0.014393
49	4.5478	1.5147
49	14.112	2.647
49	4.5289	1.5105
49	1.5502	0.43838
50	0.86747	-0.14218
50	33.737	3.5186
50	82.962	4.4184
50	160.67	5.0794
50	2.4447	0.89394
50	5.5541	1.7145
50	81.439	4.3998
50	69.284	4.2382
50	9.6797	2.27
51	25.341	3.2324
51	32.916	3.494
51	5.436	1.693
51	0.5941	-0.52071
51	1.5299	0.42519
51	16.133	2.7809
51	36.902	3.6083
51	3.2813	1.1882
51	6.6242	1.8907
51	487.7	6.1897
51	24.457	3.1969
51	18.673	2.9271
52	68.789	4.231
52	0.55344	-0.5916
52	1.2923	0.25644
52	0.94705	-0.054401
52	0.18528	-1.6859
52	7.1058	1.9609
52	19.471	2.9689
52	33.278	3.5049
52	8.6218	2.1543
52	56.381	4.0321
52	3.1491	1.1471
52	90.505	4.5054
52	10.067	2.3093
53	2.3498	0.85433
53	2.062	0.72368
53	0.39973	-0.91696
53	12.517	2.5271
53	0.50977	-0.6738
53	11.934	2.4794
53	7.7247	2.0444
53	4.1411	1.421
53	36.804	3.6056
53	28.071	3.3347
53	7.3419	1.9936
53	5.7335	1.7463
53	4.3324	1.4661
53	3.4676	1.2435
53	0.99563	-0.0043793
53	7.3427	1.9937
53	5.9826	1.7889
54	46.468	3.8388
54	173.2	5.1544
54	194.5	5.2704
54	4.069	1.4034
54	11.933	2.4793
54	28.435	3.3476
54	44.929	3.8051
54	7.8996	2.0668
54	1.1682	0.15544
55	10.683	2.3687
55	8.3158	2.1182
55	2.995	1.0969
55	0.81205	-0.20819
55	3.3305	1.2031
55	107.99	4.682
55	12.721	2.5433
55	15.785	2.7591
55	3.2798	1.1878
55	2.0233	0.70471
55	14.926	2.7031
55	2.6799	0.98579
55	3.1204	1.138
55	33.154	3.5012
56	10.365	2.3384
56	8.7462	2.1686
56	4.3335	1.4664
56	7.4765	2.0118
56	6.8659	1.9266
56	2.658	0.97759
56	23.785	3.1691
56	28.304	3.343
56	4.9788	1.6052
56	6.7173	1.9047
56	1.1124	0.10652
56	174.59	5.1624
56	11.417	2.4351
56	31.095	3.4371
56	9.2774	2.2276
56	6.8697	1.9271
56	36.301	3.5919
56	15.82	2.7613
56	2.8679	1.0536
56	42.132	3.7408
56	1.3684	0.31362
57	3.0939	1.1294
57	2.485	0.91026
57	97.395	4.5788
57	1.8706	0.62628
57	9.4496	2.246
57	8.2706	2.1127
57	1.0859	0.082396
57	3.525	1.2599
57	6.3302	1.8453
57	7.9674	2.0754
57	1.4139	0.34636
57	25.094	3.2226
57	0.81265	-0.20746
57	8.2351	2.1084
57	23.64	3.1629
57	36.659	3.6017
57	71.299	4.2669
57	2.9564	1.084
57	21.281	3.0578
57	6.0804	1.8051
57	0.71948	-0.32923
57	50.375	3.9195
57	0.82938	-0.18708
58	0.30435	-1.1896
58	2.5386	0.93161
58	6.882	1.9289
58	12.594	2.5332
58	0.92201	-0.081199
58	135.73	4.9107
58	2.1128	0.74801
58	28.576	3.3526
58	10.057	2.3082
58	1.8241	0.6011
58	3.2333	1.1735
58	3.031	1.1089
58	28.774	3.3595
58	14.628	2.683
59	83.733	4.4276
59	2.6226	0.96416
59	59.934	4.0932
59	35.731	3.576
59	34.326	3.5359
59	16.31	2.7918
59	0.7593	-0.27536
59	9.3397	2.2343
59	2.8949	1.0629
59	22.038	3.0927
59	0.60726	-0.4988
59	15.084	2.7136
59	5.7186	1.7437
59	2.4012	0.87596
59	4.8556	1.5801
59	66.499	4.1972
59	174.86	5.164
59	2.1205	0.75166
59	10.206	2.323
59	101.71	4.6221
59	5.0203	1.6135
59	10.873	2.3863
59	83.259	4.422
59	6.6724	1.898
59	20.234	3.0074
59	7.4597	2.0095
59	1.4619	0.37972
59	18.343	2.9093
59	2.4581	0.89939
59	35.302	3.5639
59	1.7002	0.53076
59	1.3898	0.3292
59	1.0413	0.040488
59	5.0006	1.6096
59	6.3308	1.8454
59	57.969	4.0599
59	0.68726	-0.37505
60	0.58874	-0.52976
60	3.1134	1.1357
60	18.472	2.9162
60	2.3966	0.87405
60	3.1851	1.1585
60	27.227	3.3042
60	40.087	3.6911
60	8.331	2.12
60	5.3174	1.671
60	18.143	2.8983
60	1.2137	0.19371
60	14.923	2.7029
60	2.9077	1.0674
60	365.62	5.9016
60	4.5513	1.5154
60	3.1092	1.1344
60	29.188	3.3738
60	19.911	2.9913
60	22.333	3.1061
60	12.042	2.4884
60	74.328	4.3085
60	1.273	0.24135
60	2.3335	0.84735
60	2.7079	0.99617
60	59.017	4.0778
60	39.081	3.6656
60	2.829	1.0399
60	0.18737	-1.6747
60	1.8588	0.61993
60	4.3389	1.4676
61	4.1257	1.4172
61	4.9481	1.599
61	1.05	0.048808
61	34.789	3.5493
61	61.805	4.124
61	78.163	4.3588
61	11.952	2.4809
61	4.275	1.4528
61	8.6671	2.1595
61	2.7337	1.0057
61	17.71	2.8741
61	5.934	1.7807
61	41.129	3.7167
61	5.3601	1.679
61	91.976	4.5215
61	67.203	4.2077
61	5.1756	1.644
61	13.829	2.6267
61	26.022	3.259
61	3.7473	1.321
61	47.607	3.863
61	0.8356	-0.1796
61	1.5897	0.46353
61	4.4913	1.5021
61	3.3758	1.2166
61	9.2852	2.2284
61	5.082	1.6257
61	14.585	2.68
61	27.873	3.3277
61	1.1308	0.12292
61	1.5119	0.41339
61	12.869	2.5548
61	16.727	2.817
61	31.576	3.4524
61	14.11	2.6469
61	3.2499	1.1786
62	8.144	2.0973
62	65.811	4.1868
62	1.2566	0.22838
62	4.2664	1.4508
62	47.912	3.8694
62	2.7475	1.0107
62	6.0876	1.8063
62	16.754	2.8186
62	3.6436	1.293
62	4.4688	1.4971
62	0.83986	-0.17452
62	1.4499	0.37147
62	3.1409	1.1445
62	11.321	2.4267
62	8.3372	2.1207
62	2.3953	0.87351
62	0.90573	-0.099019
62	17.943	2.8872
62	0.90149	-0.1037
62	9.6004	2.2618
62	13.672	2.6154
62	24.187	3.1858
62	3.9555	1.3751
62	2.8743	1.0558
62	392.61	5.9728
62	40.449	3.7
62	1.0319	0.031443
62	1.985	0.68561
62	1.0956	0.091284
62	15.685	2.7527
62	4.9173	1.5928
62	2.2158	0.79559
62	1.2362	0.21201
62	15.112	2.7155
62	2.543	0.93333
62	12.615	2.5349
62	67.085	4.206
62	36.045	3.5848
63	6.5392	1.8778
63	13.942	2.6349
63	6.9923	1.9448
63	0.33019	-1.1081
63	1.6619	0.50797
63	22.523	3.1145
63	10.026	2.3052
63	8.7865	2.1732
63	2.1427	0.76209
63	6.2243	1.8285
63	7.2888	1.9863
63	0.12767	-2.0583
63	4.1119	1.4139
63	92.475	4.5269
63	7.2603	1.9824
63	3.4436	1.2365
63	20.079	2.9997
63	1.9542	0.66996
63	1.6997	0.53043
63	156.24	5.0514
63	13.041	2.5681
63	7.271	1.9839
63	5.8357	1.764
63	20.991	3.0441
63	6.6376	1.8927
63	5.016	1.6126
63	39.485	3.6759
63	0.23356	-1.4543
63	4.3126	1.4615
63	1.1416	0.13243
63	72.235	4.2799
63	65.886	4.1879
63	26.208	3.2661
63	4.4749	1.4985
64	17.185	2.844
64	12.123	2.4951
64	3.8351	1.3442
64	12.027	2.4872
64	16.201	2.7851
64	0.49254	-0.70818
64	1.3603	0.30768
64	4.6159	1.5295
64	22.21	3.1005
64	2.7056	0.99533
64	1.1295	0.12178
64	14.844	2.6976
64	14.407	2.6677
64	10.917	2.3903
64	3.956	1.3752
64	37.596	3.6269
64	1.5793	0.45695
64	17.239	2.8472
64	0.25994	-1.3473
64	9.8738	2.2899
64	5.3216	1.6718
64	12.944	2.5606
64	39.164	3.6678
64	2.9591	1.0849
64	0.18101	-1.7092
64	7.885	2.065
64	1.7254	0.54546
64	8.7882	2.1734
64	22.192	3.0997
64	1.7636	0.56736
64	30.911	3.4311
64	17.108	2.8396
64	11.32	2.4266
64	13.382	2.5939
64	12.993	2.5644
64	1.0846	0.081218
64	0.51111	-0.67118
64	7.7284	2.0449
64	20.484	3.0197
64	6.712	1.9039
64	23.993	3.1777
64	4.1479	1.4226
64	66.979	4.2044
65	18.978	2.9433
65	49.029	3.8924
65	8.838	2.1791
65	3.1374	1.1434
65	1.7511	0.56025
65	29.692	3.3909
65	0.073321	-2.6129
65	0.68391	-0.37993
65	69.802	4.2457
65	4.3849	1.4782
65	3.4898	1.2499
65	3.0818	1.1255
65	57.544	4.0525
65	5.598	1.7224
65	1.3848	0.32554
65	30.7	3.4243
65	1.9671	0.67655
65	21.739	3.0791
65	3.8574	1.35
65	15.708	2.7542
65	18.352	2.9098
65	9.6489	2.2668
65	26.067	3.2607
65	1.8912	0.63724
65	33.13	3.5004
65	9.4684	2.248
65	21.582	3.0719
65	8.9156	2.1878
65	32.358	3.4769
65	1.3866	0.32682
65	10.345	2.3365
65	39.267	3.6704
65	6.5447	1.8787
65	10.678	2.3682
65	0.071525	-2.6377
65	35.128	3.559
65	4.8392	1.5767
65	1.5357	0.429
65	7.2322	1.9785
65	4.6982	1.5472
65	3.5647	1.2711
65	36.303	3.5919
65	5.0147	1.6124
65	2.5653	0.94209
65	1.8783	0.63036
65	2.0191	0.70264
65	8.5303	2.1436
65	11.355	2.4297
65	5.2122	1.651
65	0.86338	-0.1469
65	0.19104	-1.6553
66	0.66501	-0.40796
66	2.0506	0.71815
66	10.13	2.3155
66	1.0082	0.0081871
66	8.129	2.0954
66	4.824	1.5736
66	12.898	2.5571
66	8.2558	2.1109
66	2.869	1.054
66	7.6867	2.0395
66	2.5884	0.95103
66	7.7121	2.0428
66	3.8221	1.3408
66	2.392	0.87213
66	5.0883	1.6269
66	1.9046	0.64426
66	14.642	2.6839
66	17.678	2.8723
66	5.4435	1.6944
66	8.1229	2.0947
66	1.1058	0.10058
66	0.93785	-0.064167
66	2.777	1.0214
66	10.378	2.3397
66	20.697	3.03
66	3.3685	1.2145
66	2.8215	1.0373
66	8.5596	2.1471
66	1.6189	0.48177
66	3.8442	1.3466
66	14.928	2.7032
66	11.566	2.448
66	3.6589	1.2972
66	0.44364	-0.81275
66	4.176	1.4294
66	24.255	3.1886
66	46.51	3.8397
66	25.126	3.2239
66	15.206	2.7217
66	9.2916	2.2291
66	4.7007	1.5477
66	4.261	1.4495
66	10.176	2.32
66	15.492	2.7403
66	26.931	3.2933
66	0.055005	-2.9003
66	4.548	1.5147
66	4.9828	1.606
66	9.5864	2.2603
66	16.709	2.8159
67	9.6304	2.2649
67	18.725	2.9298
67	7.9132	2.0685
67	10.995	2.3974
67	8.4951	2.1395
67	78.498	4.3631
67	3.2507	1.1789
67	9.5603	2.2576
67	3.2293	1.1723
67	28.81	3.3607
67	2.5317	0.92889
67	30.668	3.4232
67	16.709	2.816
67	57.317	4.0486
67	3.6483	1.2943
67	0.20759	-1.5722
67	11.089	2.4059
67	28.995	3.3671
67	2.5628	0.9411
67	1.4689	0.38454
67	6.4816	1.869
67	1.4116	0.34471
67	25.757	3.2487
67	1.2642	0.23445
67	5.6664	1.7346
67	41.634	3.7289
67	0.50601	-0.68121
67	0.66718	-0.4047
67	39.49	3.6761
67	18.266	2.9051
67	29.25	3.3759
67	1.4441	0.36748
67	9.1158	2.21
67	0.88289	-0.12456
67	0.81402	-0.20577
67	34.081	3.5287
67	7.2856	1.9859
67	12.987	2.5639
67	19.635	2.9773
67	3.3696	1.2148
67	4.4205	1.4863
67	1.3599	0.30743
67	6.2331	1.8299
67	1.9806	0.68339
67	0.60126	-0.50872
67	20.285	3.0099
67	11.682	2.458
67	1.2467	0.22054
67	1.5299	0.4252
67	37.544	3.6255
67	2.8311	1.0407
67	1.0739	0.071251
67	4.4662	1.4965
67	2.0962	0.74014
67	16.701	2.8155
67	3.8599	1.3506
67	2.6685	0.98152
67	13.646	2.6134
67	1.6418	0.49581
67	7.824	2.0572
67	10.915	2.3901
68	2.2708	0.82013
68	2.4157	0.88197
68	0.53859	-0.61881
68	0.68179	-0.38303
68	40.388	3.6985
68	2.4161	0.88216
68	4.6598	1.539
68	1.4033	0.33881
68	6.0843	1.8057
68	21.868	3.085
68	0.94924	-0.052089
68	44.693	3.7998
68	6.1645	1.8188
68	43.578	3.7745
68	0.89936	-0.10608
68	36.707	3.603
68	3.3598	1.2119
68	6.267	1.8353
68	0.19188	-1.6509
68	25.685	3.2459
68	41.996	3.7376
68	9.5907	2.2608
68	1.3553	0.30401
68	1.8629	0.62215
68	7.5388	2.0201
68	6.2902	1.839
68	1.2011	0.18325
68	0.29857	-1.2088
68	0.35415	-1.038
68	1.5157	0.41591
68	22.737	3.124
68	25.036	3.2203
68	0.72545	-0.32096
68	7.351	1.9948
68	36.954	3.6097
68	3.9852	1.3826
68	14.268	2.658
68	9.3349	2.2338
68	120.02	4.7876
68	12.408	2.5183
68	5.2857	1.665
68	13.471	2.6005
68	1.9324	0.65878
68	13.499	2.6026
68	4.3574	1.4719
68	6.7331	1.907
68	4.3402	1.4679
68	1.514	0.41479
68	5.2862	1.6651
68	2.8263	1.039
68	3.8355	1.3443
68	9.4446	2.2454
68	8.8407	2.1794
68	2.9448	1.08
68	13.132	2.575
68	5.3954	1.6856
68	2.2048	0.79064
69	12.21	2.5023
69	12.315	2.5108
69	2.0775	0.73116
69	7.5259	2.0183
69	0.93579	-0.066368
69	5.2545	1.6591
69	16.077	2.7774
69	7.8701	2.0631
69	7.4663	2.0104
69	1.6783	0.51776
69	5.0957	1.6284
69	11.697	2.4594
69	3.7942	1.3335
69	0.96867	-0.031829
69	5.5606	1.7157
69	0.94437	-0.057238
69	10.481	2.3496
69	1.1288	0.12118
69	0.772	-0.25878
69	6.6383	1.8929
69	1.2839	0.24987
69	13.389	2.5945
69	20.085	3
69	16.519	2.8045
69	1.6445	0.49746
69	4.0348	1.3949
69	3.1511	1.1478
69	21.651	3.075
69	13.03	2.5672
69	31.101	3.4372
69	4.0867	1.4077
69	0.91741	-0.086199
69	2.5961	0.95401
69	14.677	2.6863
69	5.6204	1.7264
69	1.2869	0.2522
69	1.3237	0.28041
69	6.3124	1.8425
69	12.219	2.503
69	3.0167	1.1042
69	19.473	2.969
69	6.7189	1.9049
69	5.5871	1.7205
69	7.8581	2.0615
69	4.7447	1.557
69	65.493	4.1819
69	7.7538	2.0482
69	1.9218	0.65324
69	0.60744	-0.4985
69	0.11155	-2.1932
69	6.7995	1.9168
69	2.972	1.0892
69	19.221	2.956
69	20.463	3.0186
69	2.3561	0.85703
69	3.8171	1.3395
69	5.3072	1.6691
69	1.7423	0.5552
70	1.3512	0.30098
70	20.247	3.008
70	17.536	2.8643
70	6.422	1.8597
70	17.695	2.8733
70	6.8174	1.9195
70	34.657	3.5455
70	8.8313	2.1783
70	2.1776	0.77825
70	14.228	2.6552
70	1.0483	0.047171
70	20.534	3.0221
70	16.294	2.7908
70	1.7349	0.55095
70	3.1242	1.1392
70	33.767	3.5195
70	3.0352	1.1103
70	18.294	2.9066
70	26.41	3.2737
70	1.1598	0.14823
70	1.2213	0.19991
70	7.6845	2.0392
70	27.906	3.3288
70	1.0602	0.058449
70	2.1767	0.77781
70	53.18	3.9737
70	36.655	3.6015
70	4.7518	1.5585
70	4.9741	1.6042
70	7.194	1.9732
70	1.8186	0.59809
70	78.967	4.369
70	3.2832	1.1888
70	3.4303	1.2327
70	1.1506	0.14025
70	9.6197	2.2638
70	0.50325	-0.68668
70	13.826	2.6265
70	12.15	2.4974
70	45.837	3.8251
70	6.2386	1.8308
70	9.7293	2.2751
70	0.89998	-0.10539
70	5.1617	1.6413
70	17.108	2.8396
70	3.6249	1.2878
70	0.35394	-1.0386
70	17.63	2.8696
70	4.7242	1.5527
70	3.8268	1.342
70	5.4676	1.6988
70	7.5647	2.0235
70	0.86123	-0.1494
70	0.87263	-0.13625
70	12.952	2.5612
70	7.9	2.0669
70	0.74433	-0.29527
70	2.9599	1.0852
70	7.9998	2.0794
70	4.9492	1.5992
70	2.9528	1.0827
70	11.244	2.4198
70	10.176	2.3201
70	6.352	1.8488
70	6.8577	1.9254
70	0.85864	-0.1524
70	3.9606	1.3764
70	0.83787	-0.17689
70	0.084746	-2.4681
70	31.588	3.4528
70	7.4211	2.0043
70	9.6425	2.2662
70	5.8973	1.7745
70	12.883	2.5559
70	5.8482	1.7661
70	1.5884	0.46272
70	0.25332	-1.3731
70	35.19	3.5608
70	19.795	2.9854
70	6.3954	1.8556
70	0.29406	-1.224
71	8.9752	2.1945
71	0.53816	-0.61961
71	12.639	2.5368
71	0.54148	-0.61345
71	6.6865	1.9001
71	3.7283	1.316
71	13.874	2.63
71	16.341	2.7937
71	8.5194	2.1423
71	1.6014	0.47085
71	1.1631	0.15108
71	10.323	2.3344
71	9.6824	2.2703
71	16.196	2.7847
71	2.9467	1.0807
71	2.6498	0.9745
71	5.6358	1.7291
71	1.3919	0.3307
71	7.4378	2.0066
71	3.5414	1.2645
71	13.711	2.6182
71	4.3238	1.4641
71	1.3968	0.33419
71	7.4096	2.0028
71	5.9419	1.782
71	22.663	3.1207
71	2.741	1.0083
71	10.829	2.3822
71	1.1159	0.10966
71	1.4438	0.36731
71	3.224	1.1706
71	15.269	2.7258
71	4.9312	1.5956
71	7.8665	2.0626
71	2.5074	0.91924
71	12.787	2.5484
71	1.3168	0.27524
71	7.9784	2.0767
71	4.0478	1.3982
71	29.625	3.3886
71	2.0098	0.69803
71	1.8789	0.63068
71	0.59593	-0.51763
71	8.5749	2.1488
71	9.9046	2.293
71	1.3483	0.29882
71	10.461	2.3476
71	8.5793	2.1493
71	1.2905	0.25506
71	8.3434	2.1215
71	18.004	2.8906
71	23.471	3.1558
71	5.0854	1.6264
71	10.258	2.328
71	1.4979	0.40405
71	37.639	3.628
71	5.0936	1.628
71	1.2205	0.19928
71	7.798	2.0539
71	19.269	2.9585
71	4.227	1.4415
71	16.572	2.8077
71	1.0132	0.013112
71	24.075	3.1812
71	7.5669	2.0238
71	3.9775	1.3807
71	2.5839	0.94928
71	4.0647	1.4023
71	1.2375	0.21309
71	10.437	2.3453
71	8.8538	2.1809
71	1.2109	0.19139
71	3.6175	1.2858
71	4.8896	1.5871
72	1.4843	0.39496
72	10.87	2.386
72	0.83246	-0.18337
72	0.48162	-0.7306
72	0.66956	-0.40113
72	12.156	2.4978
72	2.6753	0.98408
72	2.6249	0.96503
72	7.5474	2.0212
72	3.6611	1.2978
72	3.1216	1.1383
72	14.832	2.6968
72	1.9666	0.67629
72	8.1999	2.1041
72	20.446	3.0178
72	1.507	0.41014
72	1.0238	0.023563
72	1.8988	0.64122
72	0.16555	-1.7985
72	0.54682	-0.60363
72	5.5924	1.7214
72	5.7262	1.7451
72	4.0172	1.3906
72	0.3892	-0.94367
72	12.024	2.4869
72	22.478	3.1126
72	0.37724	-0.97489
72	78.567	4.364
72	0.71443	-0.33628
72	4.5254	1.5097
72	5.0425	1.6179
72	3.4267	1.2316
72	14.272	2.6583
72	2.9647	1.0868
72	15.524	2.7424
72	1.768	0.56984
72	0.71772	-0.33168
72	12.466	2.523
72	16.816	2.8223
72	5.4113	1.6885
72	0.98749	-0.012593
72	39.997	3.6888
72	6.775	1.9132
72	6.1683	1.8194
72	3.3062	1.1958
72	9.4669	2.2478
72	8.8008	2.1748
72	10.927	2.3912
72	6.0684	1.8031
72	6.4162	1.8588
72	2.5322	0.92911
72	0.39477	-0.92944
72	1.9075	0.64578
72	20.435	3.0172
72	4.9506	1.5995
72	6.3939	1.8553
72	34.059	3.5281
72	1.1928	0.17628
72	12.486	2.5246
72	1.93	0.65753
72	1.6748	0.51572
72	53.07	3.9716
72	1.9698	0.67792
72	27.239	3.3046
72	6.1004	1.8084
72	11.183	2.4144
72	1.7938	0.58435
72	8.664	2.1592
72	5.9617	1.7854
72	4.4488	1.4926
72	4.8602	1.5811
72	8.1648	2.0998
72	9.9013	2.2927
72	41.007	3.7137
72	3.8857	1.3573
72	66.013	4.1899
72	2.7193	1.0004
72	10.114	2.314
72	0.38092	-0.96517
72	4.1322	1.4188
72	5.9934	1.7907
72	4.8028	1.5692
72	7.0069	1.9469
72	13.898	2.6318
72	10.159	2.3184
73	1.5189	0.41797
73	11.254	2.4208
73	9.451	2.2461
73	0.95284	-0.048304
73	0.48032	-0.7333
73	17.532	2.864
73	0.20658	-1.5771
73	9.858	2.2883
73	3.9816	1.3817
73	7.0496	1.953
73	1.5823	0.45891
73	15.847	2.763
73	3.6081	1.2832
73	3.1165	1.1367
73	3.9517	1.3742
73	10.954	2.3937
73	2.6516	0.97516
73	3.7683	1.3266
73	7.2029	1.9745
73	3.2272	1.1716
73	2.1707	0.77504
73	6.6175	1.8897
73	0.27481	-1.2917
73	0.24422	-1.4097
73	14.275	2.6585
73	1.5783	0.45637
73	19.306	2.9604
73	2.2945	0.8305
73	8.5788	2.1493
73	23.37	3.1515
73	1.1686	0.15579
73	3.5968	1.2801
73	3.479	1.2467
73	1.7163	0.54017
73	17.057	2.8366
73	7.8824	2.0646
73	0.57427	-0.55465
73	7.1195	1.9628
73	3.0138	1.1032
73	2.6592	0.97802
73	4.0297	1.3937
73	1.5017	0.40656
73	8.9523	2.1919
73	20.779	3.0339
73	0.42901	-0.84627
73	1.4526	0.37337
73	1.9512	0.66845
73	17.911	2.8854
73	0.90863	-0.095818
73	13.869	2.6297
73	1.7443	0.55638
73	16.532	2.8053
73	1.9591	0.6725
73	0.19115	-1.6547
73	56.807	4.0397
73	3.6173	1.2857
73	0.50635	-0.68053
73	1.9944	0.69036
73	12.09	2.4924
73	5.1431	1.6377
73	2.9336	1.0762
73	0.19034	-1.6589
73	5.8399	1.7647
73	16.378	2.7959
73	9.6321	2.2651
73	2.5964	0.95414
73	8.4349	2.1324
73	8.7657	2.1708
73	13.911	2.6327
73	41.646	3.7292
73	3.0973	1.1305
73	6.571	1.8827
73	8.969	2.1938
73	1.0762	0.073401
73	20.62	3.0263
73	6.0226	1.7955
73	2.4617	0.90086
73	5.0518	1.6197
73	9.9975	2.3023
73	2.9564	1.084
73	4.1443	1.4217
73	2.9712	1.089
73	1.8079	0.59214
73	0.51238	-0.6687
74	3.307	1.196
74	6.1075	1.8095
74	0.29444	-1.2227
74	6.397	1.8558
74	1.5734	0.45326
74	2.7135	0.99824
74	0.41805	-0.87214
74	33.246	3.5039
74	1.3607	0.308
74	12.862	2.5543
74	2.7914	1.0266
74	0.35807	-1.027
74	4.4768	1.4989
74	6.2515	1.8328
74	8.6359	2.1559
74	5.9052	1.7758
74	2.5233	0.92555
74	25.616	3.2432
74	2.2165	0.79593
74	1.5864	0.46148
74	10.997	2.3976
74	13.072	2.5705
74	11.083	2.4054
74	8.6545	2.1581
74	0.99979	-0.0002064
74	1.3535	0.30271
74	8.8629	2.1819
74	8.7754	2.172
74	3.7191	1.3135
74	4.8021	1.5691
74	0.38077	-0.96555
74	0.056715	-2.8697
74	6.864	1.9263
74	2.7264	1.003
74	3.4936	1.2509
74	0.8338	-0.18177
74	18.33	2.9085
74	9.2949	2.2295
74	4.9125	1.5918
74	0.55812	-0.58318
74	2.0176	0.70189
74	19.924	2.9919
74	6.9774	1.9427
74	5.1811	1.645
74	2.0591	0.72226
74	19.052	2.9472
74	1.5099	0.41204
74	0.42063	-0.86601
74	1.2954	0.25885
74	7.2771	1.9847
74	3.2139	1.1675
74	9.2824	2.2281
74	2.4911	0.91273
74	6.4939	1.8709
74	3.5815	1.2758
74	3.982	1.3818
74	8.7032	2.1637
74	3.1612	1.151
74	2.1583	0.76931
74	16.542	2.8059
74	5.0157	1.6126
74	6.2458	1.8319
74	1.3875	0.32754
74	4.7511	1.5584
74	18.548	2.9204
74	15.081	2.7134
74	4.7406	1.5562
74	1.804	0.58998
74	3.4501	1.2384
74	8.0036	2.0799
74	2.2929	0.82982
74	0.29519	-1.2201
74	1.328	0.28368
74	0.49836	-0.69643
74	5.368	1.6805
74	5.1063	1.6305
74	3.6676	1.2995
74	1.5741	0.45367
74	19.616	2.9763
74	2.0165	0.70134
74	1.9666	0.67629
74	7.3586	1.9959
74	2.6702	0.98216
74	1.6148	0.47921
74	2.5849	0.94967
74	3.3122	1.1976
74	0.26851	-1.3149
74	4.0764	1.4052
74	3.0919	1.1288
74	28.606	3.3536
74	3.9788	1.381
75	2.7756	1.0209
75	4.9971	1.6088
75	10.025	2.305
75	4.9939	1.6082
75	0.64965	-0.43133
75	1.2028	0.18464
75	4.2867	1.4555
75	20.496	3.0202
75	2.3938	0.87289
75	0.46295	-0.77013
75	20.569	3.0238
75	3.7888	1.3321
75	0.46633	-0.76287
75	11.723	2.4615
75	3.4558	1.24
75	9.502	2.2515
75	4.7257	1.553
75	5.4738	1.7
75	0.37992	-0.96779
75	3.3796	1.2178
75	0.5408	-0.6147
75	1.3871	0.32723
75	3.5796	1.2753
75	1.3755	0.31884
75	0.70565	-0.34863
75	0.34537	-1.0631
75	9.8576	2.2882
75	1.2667	0.23638
75	5.8433	1.7653
75	1.6816	0.51977
75	19.566	2.9738
75	3.0456	1.1137
75	6.3818	1.8534
75	11.445	2.4376
75	1.5886	0.46288
75	13.833	2.6271
75	4.0512	1.399
75	3.2477	1.178
75	0.10608	-2.2435
75	0.17464	-1.745
75	9.979	2.3005
75	8.4665	2.1361
75	43.949	3.783
75	2.779	1.0221
75	5.2928	1.6663
75	6.6691	1.8975
75	5.6671	1.7347
75	18.228	2.9029
75	1.1217	0.11488
75	4.3178	1.4628
75	8.7744	2.1718
75	2.7299	1.0042
75	0.99504	-0.0049689
75	0.24883	-1.391
75	15.644	2.7501
75	25.357	3.2331
75	12.95	2.5611
75	1.1774	0.16333
75	11.039	2.4014
75	10.602	2.361
75	5.6798	1.7369
75	5.7905	1.7562
75	2.6534	0.97584
75	0.88807	-0.1187
75	31.191	3.4401
75	6.9957	1.9453
75	5.2104	1.6507
75	3.8599	1.3507
75	5.0687	1.6231
75	11.293	2.4242
75	2.8063	1.0319
75	2.0631	0.72423
75	1.4788	0.3912
75	1.9463	0.66595
75	48.42	3.8799
75	4.7504	1.5582
75	20.369	3.014
75	6.1637	1.8187
75	2.0515	0.71859
75	5.2527	1.6588
75	7.2055	1.9748
75	3.7	1.3083
75	3.0335	1.1097
75	3.1938	1.1612
75	6.5501	1.8795
75	5.9955	1.791
75	18.976	2.9432
75	42.755	3.7555
75	1.8642	0.62283
75	1.9833	0.68478
75	2.6007	0.95579
75	1.9013	0.64254
75	5.2184	1.6522
75	4.5952	1.525
75	6.2441	1.8316
75	6.6733	1.8981
75	1.0514	0.050104
75	10.522	2.3534
75	6.4296	1.8609
75	2.3733	0.86428
75	10.475	2.349
75	3.585	1.2768
75	1.2527	0.22528
75	9.466	2.2477
75	2.3742	0.86465
75	3.3092	1.1967
75	3.3023	1.1946
75	4.3602	1.4725
75	6.7056	1.9029
75	34.741	3.5479
75	12.525	2.5277
75	2.2414	0.8071
75	4.3376	1.4673
75	2.3465	0.85292
75	0.42719	-0.85053
76	1.1844	0.16925
76	4.9735	1.6041
76	0.98738	-0.012702
76	20.294	3.0103
76	3.6832	1.3038
76	1.426	0.35485
76	6.0458	1.7994
76	4.4432	1.4914
76	5.336	1.6745
76	2.1422	0.76185
76	2.8122	1.034
76	4.5963	1.5252
76	1.563	0.44659
76	10.803	2.3799
76	4.8839	1.5859
76	0.68167	-0.38322
76	1.5515	0.43921
76	4.1589	1.4252
76	42.899	3.7588
76	2.4006	0.8757
76	3.4404	1.2356
76	0.93591	-0.066239
76	1.2507	0.22371
76	2.5833	0.94906
76	13.385	2.5941
76	1.7292	0.54766
76	2.614	0.96088
76	2.133	0.75755
76	5.385	1.6836
76	2.3447	0.85218
76	3.197	1.1622
76	2.2092	0.79263
76	11.681	2.458
76	1.5376	0.43025
76	0.88037	-0.12742
76	0.86719	-0.1425
76	22.05	3.0933
76	4.2321	1.4427
76	2.5353	0.93031
76	9.4247	2.2433
76	5.2456	1.6574
76	0.90432	-0.10057
76	3.3573	1.2111
76	10.185	2.3209
76	6.4477	1.8637
76	6.2569	1.8337
76	7.2575	1.982
76	1.0842	0.080856
76	12.069	2.4906
76	8.1653	2.0999
76	12.458	2.5224
76	6.0703	1.8034
76	6.5305	1.8765
76	8.1795	2.1016
76	10.733	2.3733
76	0.40435	-0.90548
76	4.7374	1.5555
76	0.39642	-0.92528
76	1.0447	0.043735
76	9.1188	2.2103
76	2.4583	0.89948
76	1.1285	0.12088
76	2.6188	0.9627
76	3.1149	1.1362
76	6.289	1.8388
76	14.132	2.6484
76	11.129	2.4096
76	2.8053	1.0315
76	3.3907	1.221
76	7.0174	1.9484
76	8.262	2.1117
76	16.02	2.7739
76	4.8608	1.5812
76	25.916	3.2548
76	0.27641	-1.2859
76	7.5956	2.0276
76	3.8694	1.3531
76	5.3863	1.6839
76	0.85661	-0.15478
76	1.4044	0.33964
76	5.0719	1.6237
76	3.458	1.2407
76	0.79934	-0.22396
76	0.74763	-0.29085
76	18.142	2.8982
76	6.8472	1.9238
76	0.25899	-1.351
76	0.9742	-0.026135
76	7.4269	2.0051
76	1.2628	0.23336
76	1.6291	0.48801
76	7.5716	2.0244
76	0.75009	-0.28756
76	0.47539	-0.74363
76	5.3947	1.6854
76	8.441	2.1331
76	3.2303	1.1726
76	12.904	2.5575
76	44.168	3.788
76	2.2272	0.80073
76	0.36621	-1.0046
76	7.5491	2.0214
76	3.7142	1.3121
77	3.6395	1.2918
77	0.95905	-0.041814
77	9.4214	2.243
77	3.6966	1.3074
77	6.9857	1.9439
77	2.9246	1.0732
77	0.88549	-0.12161
77	4.1847	1.4314
77	1.7241	0.54469
77	3.1347	1.1425
77	3.8739	1.3543
77	4.3802	1.4771
77	0.68534	-0.37784
77	2.4235	0.88523
77	10.674	2.3678
77	4.23	1.4422
77	11.1	2.407
77	6.9677	1.9413
77	8.237	2.1086
77	3.8543	1.3492
77	0.98372	-0.016411
77	1.5881	0.46253
77	14.829	2.6966
77	2.7671	1.0178
77	7.984	2.0774
77	4.4383	1.4903
77	15.832	2.7621
77	3.3466	1.2079
77	17.354	2.8538
77	2.4025	0.87649
77	3.2934	1.1919
77	0.32239	-1.132
77	5.7803	1.7545
77	4.1147	1.4146
77	2.4221	0.88462
77	3.5558	1.2686
77	27.193	3.303
77	4.6021	1.5265
77	2.7025	0.9942
77	1.4244	0.35373
77	2.3208	0.8419
77	0.65479	-0.42344
77	14.931	2.7034
77	1.837	0.60815
77	5.1056	1.6303
77	2.6409	0.97111
77	2.5494	0.93587
77	6.2677	1.8354
77	7.3454	1.9941
77	5.0038	1.6102
77	2.9182	1.071
77	0.5823	-0.54077
77	9.3597	2.2364
77	0.53515	-0.62521
77	10.79	2.3787
77	7.8954	2.0663
77	3.0743	1.1231
77	7.0099	1.9473
77	9.3684	2.2373
77	5.0022	1.6099
77	2.7978	1.0288
77	5.4447	1.6946
77	5.9705	1.7868
77	12.001	2.485
77	6.1261	1.8126
77	10.925	2.3911
77	3.9468	1.3729
77	8.1079	2.0928
77	7.5686	2.024
77	9.7791	2.2802
77	16.437	2.7995
77	4.0049	1.3875
77	5.4171	1.6896
77	1.2634	0.23377
77	12.516	2.527
77	1.9182	0.65139
77	2.4771	0.90709
77	2.0299	0.70799
77	0.6951	-0.36371
77	1.9507	0.6682
77	0.36206	-1.0159
77	0.90235	-0.10275
77	5.8924	1.7737
77	9.6946	2.2716
77	3.6372	1.2912
77	0.79645	-0.22759
77	4.8112	1.571
77	10.065	2.3091
77	3.3233	1.201
77	4.1783	1.4299
77	10.536	2.3548
77	1.3959	0.33353
77	4.5033	1.5048
77	14.125	2.648
77	5.213	1.6512
77	0.73062	-0.31387
77	2.9626	1.0861
77	3.1527	1.1483
77	4.0774	1.4055
77	1.0136	0.013499
77	0.29375	-1.225
77	28.153	3.3377
77	0.92503	-0.077934
77	13.933	2.6343
77	1.3221	0.27926
77	6.2703	1.8358
78	11.369	2.4309
78	8.3633	2.1239
78	3.3692	1.2147
78	2.0407	0.71328
78	12.512	2.5267
78	1.0196	0.019419
78	22.133	3.0971
78	2.1095	0.74644
78	0.53421	-0.62696
78	4.0709	1.4039
78	2.6353	0.96899
78	3.0178	1.1045
78	2.8045	1.0312
78	3.2525	1.1794
78	5.4759	1.7004
78	1.131	0.1231
78	11.586	2.4498
78	2.4856	0.9105
78	0.64005	-0.44621
78	10.869	2.3859
78	3.302	1.1945
78	4.5136	1.5071
78	1.6155	0.47963
78	8.1636	2.0997
78	1.0928	0.088757
78	6.3538	1.849
78	0.53755	-0.62073
78	4.2279	1.4417
78	3.068	1.121
78	12.1	2.4932
78	2.9975	1.0978
78	13.388	2.5943
78	8.1292	2.0955
78	9.5332	2.2548
78	1.21	0.19058
78	1.3903	0.3295
78	0.57776	-0.54859
78	15.111	2.7154
78	24.801	3.2109
78	5.8693	1.7697
78	2.3811	0.86757
78	7.5865	2.0264
78	2.1894	0.78362
78	1.9677	0.67685
78	4.5983	1.5257
78	31.867	3.4616
78	1.1914	0.17512
78	6.3216	1.844
78	9.6701	2.269
78	0.75371	-0.28275
78	12.271	2.5072
78	8.2884	2.1149
78	1.7571	0.56367
78	0.96456	-0.036078
78	1.1718	0.15852
78	5.1491	1.6388
78	16.963	2.831
78	4.0544	1.3998
78	10.255	2.3278
78	4.768	1.5619
78	4.5904	1.524
78	0.52253	-0.64908
78	13.829	2.6268
78	11.401	2.4337
78	1.6825	0.52027
78	11.126	2.4093
78	4.295	1.4575
78	4.4735	1.4982
78	0.47826	-0.73761
78	9.9385	2.2964
78	9.8768	2.2902
78	12.054	2.4894
78	0.20368	-1.5912
78	9.01	2.1983
78	36.271	3.591
78	8.1049	2.0925
78	7.252	1.9813
78	1.673	0.51463
78	18	2.8904
78	5.6602	1.7335
78	2.321	0.84198
78	7.1362	1.9652
78	0.3292	-1.1111
78	10.833	2.3826
78	0.90313	-0.10189
78	1.16	0.14839
78	1.6792	0.51831
78	2.6269	0.96579
78	0.4273	-0.85026
78	1.3176	0.27579
78	15.936	2.7686
78	4.8201	1.5728
78	3.0118	1.1026
78	0.53139	-0.63226
78	0.54527	-0.60648
78	4.3721	1.4753
78	2.9369	1.0773
78	1.6156	0.47968
78	7.8656	2.0625
78	12.588	2.5328
78	3.0495	1.115
78	1.7028	0.53225
78	10.388	2.3406
78	1.3163	0.27479
78	1.161	0.14928
78	15.258	2.7251
78	1.5118	0.4133
79	3.6862	1.3046
79	0.39414	-0.93104
79	3.4535	1.2394
79	3.3665	1.2139
79	7.157	1.9681
79	1.4047	0.3398
79	1.7652	0.56829
79	5.2202	1.6525
79	6.6356	1.8924
79	2.1266	0.7545
79	5.6191	1.7262
79	5.7669	1.7521
79	17.248	2.8477
79	1.243	0.21751
79	17.162	2.8427
79	5.4939	1.7036
79	0.7731	-0.25735
79	13.29	2.587
79	4.3415	1.4682
79	4.7223	1.5523
79	10.348	2.3368
79	0.073035	-2.6168
79	7.1301	1.9643
79	0.53065	-0.63365
79	0.028472	-3.5588
79	0.6968	-0.36126
79	6.6204	1.8902
79	2.7733	1.02
79	6.6985	1.9019
79	1.4579	0.37698
79	4.8106	1.5708
79	3.4248	1.2311
79	0.74848	-0.28971
79	10.339	2.3359
79	5.4553	1.6966
79	4.8401	1.5769
79	4.9573	1.6009
79	6.318	1.8434
79	3.7606	1.3246
79	0.47157	-0.75169
79	17.833	2.8811
79	6.4261	1.8604
79	2.5426	0.93319
79	14.529	2.6761
79	1.3849	0.32564
79	4.5143	1.5073
79	4.7643	1.5612
79	0.14395	-1.9383
79	5.0686	1.6231
79	0.062238	-2.7768
79	1.3788	0.3212
79	0.36736	-1.0014
79	4.3089	1.4607
79	1.1372	0.12853
79	1.0569	0.055311
79	1.9775	0.68186
79	1.005	0.0049773
79	4.2638	1.4502
79	4.128	1.4178
79	2.864	1.0522
79	2.6346	0.96873
79	18.502	2.9179
79	13.544	2.606
79	2.4251	0.88587
79	2.5088	0.91979
79	1.3653	0.31136
79	0.48608	-0.72139
79	3.435	1.234
79	7.3889	2
79	9.2431	2.2239
79	0.80735	-0.21399
79	1.0427	0.041831
79	11.05	2.4024
79	7.4077	2.0025
79	0.448	-0.80296
79	2.1991	0.78803
79	2.7539	1.013
79	5.8461	1.7658
79	2.1903	0.78406
79	0.78596	-0.24085
79	0.17874	-1.7218
79	7.3441	1.9939
79	3.1949	1.1616
79	6.6246	1.8908
79	1.4993	0.40502
79	2.1527	0.76675
79	0.905	-0.099815
79	4.1209	1.4161
79	0.35652	-1.0314
79	0.48701	-0.71946
79	2.9209	1.0719
79	1.8489	0.61461
79	14.431	2.6694
79	2.1777	0.77829
79	0.22438	-1.4944
79	12.068	2.4906
79	0.72592	-0.32031
79	5.5098	1.7065
79	0.65275	-0.42656
79	4.2184	1.4394
79	2.5424	0.93311
79	10.36	2.338
79	4.2931	1.457
79	0.30554	-1.1857
79	13.6	2.6101
79	1.1281	0.12051
79	1.1437	0.13425
80	28.131	3.3369
80	5.1859	1.6459
80	0.34805	-1.0554
80	1.7779	0.57541
80	1.4824	0.39367
80	0.36502	-1.0078
80	3.1304	1.1411
80	1.9443	0.66489
80	3.6792	1.3027
80	3.2777	1.1871
80	18.589	2.9226
80	0.61274	-0.48982
80	12.278	2.5078
80	3.6274	1.2885
80	2.6521	0.97534
80	4.1989	1.4348
80	4.0966	1.4102
80	24.58	3.2019
80	2.6247	0.96497
80	1.9427	0.66407
80	4.3052	1.4598
80	18.64	2.9253
80	0.90099	-0.10426
80	13.737	2.6201
80	1.275	0.24294
80	1.9634	0.67467
80	1.03	0.02958
80	6.6268	1.8911
80	1.7969	0.58607
80	0.54668	-0.60389
80	7.7359	2.0459
80	0.98285	-0.017298
80	3.0497	1.115
80	3.4003	1.2239
80	3.9922	1.3844
80	0.76728	-0.2649
80	0.2635	-1.3337
80	1.4406	0.36507
80	0.58395	-0.53794
80	9.3495	2.2353
80	2.6905	0.98974
80	2.0128	0.69952
80	7.3171	1.9902
80	2.3972	0.87429
80	3.1028	1.1323
80	0.21965	-1.5157
80	14.894	2.701
80	1.6768	0.51686
80	1.7848	0.57928
80	1.422	0.35206
80	13.645	2.6134
80	0.22377	-1.4971
80	3.768	1.3265
80	1.8299	0.60427
80	5.0757	1.6245
80	2.1549	0.76776
80	1.857	0.61897
80	4.7054	1.5487
80	3.5733	1.2735
80	3.6608	1.2977
80	0.76012	-0.27428
80	1.0811	0.07802
80	1.8736	0.62788
80	0.31233	-1.1637
80	3.5662	1.2715
80	4.8658	1.5822
80	4.6719	1.5416
80	10.841	2.3833
80	8.5453	2.1454
80	2.5945	0.95339
80	2.1085	0.746
80	1.9013	0.64253
80	6.1078	1.8096
80	11.13	2.4096
80	1.9687	0.67738
80	0.53659	-0.62252
80	0.42134	-0.86432
80	20.755	3.0328
80	7.0361	1.9511
80	2.3337	0.84744
80	2.0819	0.7333
80	42.84	3.7575
80	0.74669	-0.29211
80	0.5869	-0.53291
80	6.8107	1.9185
80	1.5932	0.46572
80	3.7762	1.3287
80	4.9374	1.5968
80	4.1419	1.4211
80	3.1784	1.1564
80	11.916	2.4779
80	17.308	2.8512
80	7.7742	2.0508
80	3.3437	1.2071
80	5.7754	1.7536
80	0.74849	-0.2897
80	8.3639	2.1239
80	1.0895	0.085764
80	4.4381	1.4902
80	1.4354	0.36145
80	1.3389	0.29188
80	2.0411	0.7135
80	0.54011	-0.61599
80	5.8489	1.7663
80	2.1288	0.75554
80	7.6902	2.0399
81	13.161	2.5772
81	0.23526	-1.4471
81	0.65821	-0.41823
81	4.4975	1.5035
81	1.9254	0.65514
81	3.1228	1.1387
81	5.4158	1.6893
81	0.88659	-0.12037
81	0.80041	-0.22264
81	1.6307	0.48904
81	9.1922	2.2184
81	0.89054	-0.11592
81	8.7004	2.1634
81	2.8138	1.0345
81	5.5902	1.721
81	0.14368	-1.9402
81	1.1338	0.12555
81	2.4603	0.90027
81	7.1714	1.9701
81	7.2204	1.9769
81	5.8056	1.7588
81	1.8197	0.59866
81	8.0302	2.0832
81	3.682	1.3035
81	8.6014	2.1519
81	0.23543	-1.4463
81	1.7532	0.56146
81	2.0479	0.71679
81	3.4346	1.2339
81	1.5498	0.4381
81	0.58666	-0.53332
81	0.98985	-0.010202
81	13.654	2.614
81	11.56	2.4475
81	5.5751	1.7183
81	1.2652	0.23525
81	7.8184	2.0565
81	0.39871	-0.91953
81	3.2999	1.1939
81	0.81902	-0.19964
81	0.81062	-0.20996
81	6.9204	1.9345
81	1.3975	0.33469
81	1.1154	0.10926
81	0.5988	-0.51282
81	4.629	1.5323
81	3.2247	1.1708
81	1.2983	0.26104
81	1.1593	0.14784
81	0.44228	-0.81582
81	1.8645	0.62297
81	5.7834	1.755
81	0.38266	-0.96061
81	5.489	1.7027
81	16.099	2.7788
81	5.5113	1.7068
81	4.0431	1.397
81	1.8653	0.62344
81	1.2735	0.2418
81	0.30357	-1.1922
81	0.94461	-0.056984
81	5.8329	1.7635
81	0.56657	-0.56815
81	8.4777	2.1374
81	6.2657	1.8351
81	2.7516	1.0122
81	1.218	0.19724
81	1.8913	0.63725
81	3.9826	1.3819
81	2.7872	1.0251
81	9.9171	2.2943
81	10.167	2.3192
81	1.7058	0.53402
81	1.1845	0.16934
81	2.7418	1.0086
81	1.1695	0.15657
81	1.2417	0.21648
81	9.6015	2.2619
81	1.3101	0.27009
81	0.80678	-0.2147
81	7.9116	2.0683
81	4.0862	1.4076
81	1.5547	0.4413
81	2.0781	0.73145
81	2.8956	1.0632
81	0.80569	-0.21605
81	1.2635	0.23391
81	2.9261	1.0737
81	4.4949	1.5029
81	0.64869	-0.4328
81	3.2233	1.1704
81	3.7819	1.3302
81	12.38	2.5161
81	1.7946	0.58481
81	1.3269	0.28286
82	0.18404	-1.6926
82	4.0296	1.3937
82	4.5849	1.5228
82	0.32094	-1.1365
82	0.98283	-0.017323
82	2.8132	1.0343
82	3.6556	1.2963
82	1.226	0.20372
82	5.3124	1.67
82	0.8469	-0.16618
82	3.1239	1.1391
82	0.08737	-2.4376
82	2.6366	0.96951
82	13.679	2.6158
82	1.6769	0.51696
82	2.0979	0.74096
82	7.9077	2.0678
82	0.298	-1.2107
82	3.9105	1.3637
82	6.5313	1.8766
82	35.771	3.5771
82	2.5696	0.94374
82	1.7506	0.55996
82	1.6481	0.49961
82	1.4623	0.38001
82	3.4781	1.2465
82	3.8457	1.347
82	1.8468	0.61346
82	0.46651	-0.76248
82	0.56469	-0.57147
82	5.9006	1.7751
82	1.3931	0.33155
82	7.2679	1.9835
82	1.4859	0.39601
82	3.7626	1.3251
82	20.633	3.0269
82	0.60277	-0.50621
82	4.0937	1.4095
82	13.56	2.6071
82	7.102	1.9604
82	7.7769	2.0512
82	3.5651	1.2712
82	0.68331	-0.38081
82	1.7898	0.58212
82	19.131	2.9513
82	2.4246	0.88569
82	0.85854	-0.15252
82	0.73039	-0.31418
82	6.1436	1.8154
82	0.52161	-0.65083
82	3.905	1.3623
82	0.58183	-0.54158
82	1.032	0.031486
82	0.1764	-1.735
82	9.3523	2.2356
82	26.418	3.274
82	0.65129	-0.4288
82	9.5844	2.2601
82	5.7727	1.7531
82	0.57232	-0.55806
82	0.41479	-0.87999
82	1.5408	0.43227
82	0.72914	-0.31589
82	0.72121	-0.32682
82	2.3397	0.85004
82	0.56466	-0.57153
82	2.6274	0.96598
82	1.005	0.0050153
82	11.809	2.4689
82	8.6684	2.1597
82	1.7688	0.57032
82	3.4246	1.231
82	0.54666	-0.60393
82	4.6218	1.5308
82	1.6764	0.51666
82	5.7195	1.7439
82	0.59764	-0.51476
82	1.0899	0.086076
82	0.70824	-0.34497
82	2.8667	1.0532
82	1.8265	0.60238
82	14.749	2.6912
82	3.7685	1.3267
82	6.3368	1.8464
82	27.047	3.2976
82	6.7377	1.9077
82	3.0475	1.1143
82	6.54	1.8779
82	2.9429	1.0794
82	0.82952	-0.1869
82	0.87544	-0.13303
82	12.928	2.5594
82	4.9731	1.604
82	1.2608	0.23173
82	0.64258	-0.44226
82	0.8299	-0.18645
82	2.6504	0.97471
82	0.39856	-0.91989
82	6.1259	1.8125
83	0.73174	-0.31233
83	4.2739	1.4525
83	8.8241	2.1775
83	1.861	0.62113
83	3.4092	1.2265
83	0.8316	-0.18441
83	5.2487	1.658
83	6.166	1.8191
83	0.35064	-1.048
83	10.166	2.3191
83	3.6285	1.2888
83	0.92895	-0.073699
83	11.625	2.4532
83	6.0793	1.8049
83	0.73215	-0.31176
83	2.5954	0.95374
83	8.7801	2.1725
83	2.2481	0.81008
83	5.7751	1.7536
83	0.3679	-0.99994
83	2.8703	1.0544
83	6.7297	1.9065
83	0.70268	-0.35286
83	0.46702	-0.76138
83	0.49994	-0.69327
83	1.7021	0.53189
83	2.8806	1.058
83	3.3358	1.2047
83	3.4917	1.2504
83	1.6656	0.5102
83	1.796	0.58556
83	2.5138	0.9218
83	0.87951	-0.12839
83	1.4297	0.35744
83	0.60478	-0.5029
83	1.0532	0.051808
83	0.75483	-0.28127
83	6.6678	1.8973
83	2.4751	0.90628
83	5.4514	1.6959
83	3.438	1.2349
83	0.97301	-0.027365
83	6.0496	1.8
83	1.7997	0.58763
83	1.7875	0.58081
83	1.0149	0.014839
83	4.965	1.6024
83	11.162	2.4125
83	0.84768	-0.16525
83	0.17376	-1.7501
83	9.5399	2.2555
83	0.53657	-0.62256
83	6.9905	1.9445
83	1.3928	0.33133
83	5.1997	1.6486
83	3.3301	1.203
83	3.8069	1.3368
83	8.9274	2.1891
83	4.6362	1.5339
83	3.4858	1.2487
83	3.6734	1.3011
83	4.824	1.5736
83	0.4549	-0.78767
83	3.5755	1.2741
83	3.6342	1.2904
83	1.5572	0.44292
83	1.965	0.67551
83	0.24898	-1.3904
83	2.5182	0.92354
83	3.9351	1.3699
83	0.75819	-0.27682
83	4.819	1.5726
83	1.2163	0.19581
83	0.97649	-0.023786
83	1.339	0.29192
83	2.9118	1.0688
83	4.4792	1.4995
83	1.8846	0.63371
83	0.45164	-0.79486
83	9.4613	2.2472
83	8.3276	2.1196
83	4.1316	1.4187
83	1.9885	0.68737
83	5.1041	1.63
83	0.6068	-0.49956
[truncated: 737 more rows]
