# Supplementary material for: Quantifying the Potential for Future Gene Therapy to Lower Lifetime Risk of Polygenic Late-Onset Diseases
Source: MDPI journal article supplement (doi:10.3390/ijms20133352), 2019-07-08
Supplement: s2 [file s2 › SuppFiles/Results/LODsCommonLow/Stroke/DensityPostAnalysis.csv]

age	A..1..	A..2..	A..3..	A..4..	A..5..	A..6..	A..7..	A..8..	A..9..	A..10..	A..11..	A..12..	A..13..	A..14..	A..15..	A..16..	A..17..	A..18..	A..19..	A..20..
1	0.0000000e+00	0.0000000e+00	0.0000000e+00	0.0000000e+00	0.0000000e+00	0.0000000e+00	0.0000000e+00	0.0000000e+00	0.0000000e+00	0.0000000e+00	0.0000000e+00	0.0000000e+00	0.0000000e+00	0.0000000e+00	0.0000000e+00	0.0000000e+00	0.0000000e+00	0.0000000e+00	0.0000000e+00	0.0000000e+00
2	0.0000000e+00	0.0000000e+00	0.0000000e+00	0.0000000e+00	0.0000000e+00	0.0000000e+00	0.0000000e+00	0.0000000e+00	0.0000000e+00	0.0000000e+00	0.0000000e+00	0.0000000e+00	0.0000000e+00	0.0000000e+00	0.0000000e+00	0.0000000e+00	0.0000000e+00	0.0000000e+00	0.0000000e+00	0.0000000e+00
3	0.0000000e+00	0.0000000e+00	0.0000000e+00	0.0000000e+00	0.0000000e+00	0.0000000e+00	0.0000000e+00	0.0000000e+00	0.0000000e+00	0.0000000e+00	0.0000000e+00	0.0000000e+00	0.0000000e+00	0.0000000e+00	0.0000000e+00	0.0000000e+00	0.0000000e+00	0.0000000e+00	0.0000000e+00	0.0000000e+00
4	0.0000000e+00	0.0000000e+00	0.0000000e+00	0.0000000e+00	0.0000000e+00	0.0000000e+00	0.0000000e+00	0.0000000e+00	0.0000000e+00	0.0000000e+00	0.0000000e+00	0.0000000e+00	0.0000000e+00	0.0000000e+00	0.0000000e+00	0.0000000e+00	0.0000000e+00	0.0000000e+00	0.0000000e+00	0.0000000e+00
5	0.0000000e+00	0.0000000e+00	0.0000000e+00	0.0000000e+00	0.0000000e+00	0.0000000e+00	0.0000000e+00	0.0000000e+00	0.0000000e+00	0.0000000e+00	0.0000000e+00	0.0000000e+00	0.0000000e+00	0.0000000e+00	0.0000000e+00	0.0000000e+00	0.0000000e+00	0.0000000e+00	0.0000000e+00	0.0000000e+00
6	0.0000000e+00	0.0000000e+00	0.0000000e+00	0.0000000e+00	0.0000000e+00	0.0000000e+00	0.0000000e+00	0.0000000e+00	0.0000000e+00	0.0000000e+00	0.0000000e+00	0.0000000e+00	0.0000000e+00	0.0000000e+00	0.0000000e+00	0.0000000e+00	0.0000000e+00	0.0000000e+00	0.0000000e+00	0.0000000e+00
7	0.0000000e+00	0.0000000e+00	0.0000000e+00	0.0000000e+00	0.0000000e+00	0.0000000e+00	0.0000000e+00	0.0000000e+00	0.0000000e+00	0.0000000e+00	0.0000000e+00	0.0000000e+00	0.0000000e+00	0.0000000e+00	0.0000000e+00	0.0000000e+00	0.0000000e+00	0.0000000e+00	0.0000000e+00	0.0000000e+00
8	0.0000000e+00	0.0000000e+00	0.0000000e+00	0.0000000e+00	0.0000000e+00	0.0000000e+00	0.0000000e+00	0.0000000e+00	0.0000000e+00	0.0000000e+00	0.0000000e+00	0.0000000e+00	0.0000000e+00	0.0000000e+00	0.0000000e+00	0.0000000e+00	0.0000000e+00	0.0000000e+00	0.0000000e+00	0.0000000e+00
9	0.0000000e+00	0.0000000e+00	0.0000000e+00	0.0000000e+00	0.0000000e+00	0.0000000e+00	0.0000000e+00	0.0000000e+00	0.0000000e+00	0.0000000e+00	0.0000000e+00	0.0000000e+00	0.0000000e+00	0.0000000e+00	0.0000000e+00	0.0000000e+00	0.0000000e+00	0.0000000e+00	0.0000000e+00	0.0000000e+00
10	0.0000000e+00	0.0000000e+00	0.0000000e+00	0.0000000e+00	0.0000000e+00	0.0000000e+00	0.0000000e+00	0.0000000e+00	0.0000000e+00	0.0000000e+00	0.0000000e+00	0.0000000e+00	0.0000000e+00	0.0000000e+00	0.0000000e+00	0.0000000e+00	0.0000000e+00	0.0000000e+00	0.0000000e+00	0.0000000e+00
11	0.0000000e+00	0.0000000e+00	0.0000000e+00	0.0000000e+00	0.0000000e+00	0.0000000e+00	0.0000000e+00	0.0000000e+00	0.0000000e+00	0.0000000e+00	0.0000000e+00	0.0000000e+00	0.0000000e+00	0.0000000e+00	0.0000000e+00	0.0000000e+00	0.0000000e+00	0.0000000e+00	0.0000000e+00	0.0000000e+00
12	0.0000000e+00	0.0000000e+00	0.0000000e+00	0.0000000e+00	0.0000000e+00	0.0000000e+00	0.0000000e+00	0.0000000e+00	0.0000000e+00	0.0000000e+00	0.0000000e+00	0.0000000e+00	0.0000000e+00	0.0000000e+00	0.0000000e+00	0.0000000e+00	0.0000000e+00	0.0000000e+00	0.0000000e+00	0.0000000e+00
13	0.0000000e+00	0.0000000e+00	0.0000000e+00	0.0000000e+00	0.0000000e+00	0.0000000e+00	0.0000000e+00	0.0000000e+00	0.0000000e+00	0.0000000e+00	0.0000000e+00	0.0000000e+00	0.0000000e+00	0.0000000e+00	0.0000000e+00	0.0000000e+00	0.0000000e+00	0.0000000e+00	0.0000000e+00	0.0000000e+00
14	0.0000000e+00	0.0000000e+00	0.0000000e+00	0.0000000e+00	0.0000000e+00	0.0000000e+00	0.0000000e+00	0.0000000e+00	0.0000000e+00	0.0000000e+00	0.0000000e+00	0.0000000e+00	0.0000000e+00	0.0000000e+00	0.0000000e+00	0.0000000e+00	0.0000000e+00	0.0000000e+00	0.0000000e+00	0.0000000e+00
15	0.0000000e+00	0.0000000e+00	0.0000000e+00	0.0000000e+00	0.0000000e+00	0.0000000e+00	0.0000000e+00	0.0000000e+00	0.0000000e+00	0.0000000e+00	0.0000000e+00	0.0000000e+00	0.0000000e+00	0.0000000e+00	0.0000000e+00	0.0000000e+00	0.0000000e+00	0.0000000e+00	0.0000000e+00	0.0000000e+00
16	0.0000000e+00	0.0000000e+00	0.0000000e+00	0.0000000e+00	0.0000000e+00	0.0000000e+00	0.0000000e+00	0.0000000e+00	0.0000000e+00	0.0000000e+00	0.0000000e+00	0.0000000e+00	0.0000000e+00	0.0000000e+00	0.0000000e+00	0.0000000e+00	0.0000000e+00	0.0000000e+00	0.0000000e+00	0.0000000e+00
17	0.0000000e+00	0.0000000e+00	0.0000000e+00	0.0000000e+00	0.0000000e+00	0.0000000e+00	0.0000000e+00	0.0000000e+00	0.0000000e+00	0.0000000e+00	0.0000000e+00	0.0000000e+00	0.0000000e+00	0.0000000e+00	0.0000000e+00	0.0000000e+00	0.0000000e+00	0.0000000e+00	0.0000000e+00	0.0000000e+00
18	0.0000000e+00	0.0000000e+00	0.0000000e+00	0.0000000e+00	0.0000000e+00	0.0000000e+00	0.0000000e+00	0.0000000e+00	0.0000000e+00	0.0000000e+00	0.0000000e+00	0.0000000e+00	0.0000000e+00	0.0000000e+00	0.0000000e+00	0.0000000e+00	0.0000000e+00	0.0000000e+00	0.0000000e+00	0.0000000e+00
19	0.0000000e+00	0.0000000e+00	0.0000000e+00	0.0000000e+00	0.0000000e+00	0.0000000e+00	0.0000000e+00	0.0000000e+00	0.0000000e+00	0.0000000e+00	0.0000000e+00	0.0000000e+00	0.0000000e+00	0.0000000e+00	0.0000000e+00	0.0000000e+00	0.0000000e+00	0.0000000e+00	0.0000000e+00	0.0000000e+00
20	0.0000000e+00	0.0000000e+00	0.0000000e+00	0.0000000e+00	0.0000000e+00	0.0000000e+00	0.0000000e+00	0.0000000e+00	0.0000000e+00	0.0000000e+00	0.0000000e+00	0.0000000e+00	0.0000000e+00	0.0000000e+00	0.0000000e+00	0.0000000e+00	0.0000000e+00	0.0000000e+00	0.0000000e+00	0.0000000e+00
21	0.0000000e+00	0.0000000e+00	0.0000000e+00	0.0000000e+00	0.0000000e+00	0.0000000e+00	0.0000000e+00	0.0000000e+00	0.0000000e+00	0.0000000e+00	0.0000000e+00	0.0000000e+00	0.0000000e+00	0.0000000e+00	0.0000000e+00	0.0000000e+00	0.0000000e+00	0.0000000e+00	0.0000000e+00	0.0000000e+00
22	0.0000000e+00	0.0000000e+00	0.0000000e+00	0.0000000e+00	0.0000000e+00	0.0000000e+00	0.0000000e+00	0.0000000e+00	0.0000000e+00	0.0000000e+00	0.0000000e+00	0.0000000e+00	0.0000000e+00	0.0000000e+00	0.0000000e+00	0.0000000e+00	0.0000000e+00	0.0000000e+00	0.0000000e+00	0.0000000e+00
23	0.0000000e+00	0.0000000e+00	0.0000000e+00	0.0000000e+00	0.0000000e+00	0.0000000e+00	0.0000000e+00	0.0000000e+00	0.0000000e+00	0.0000000e+00	0.0000000e+00	0.0000000e+00	0.0000000e+00	0.0000000e+00	0.0000000e+00	0.0000000e+00	0.0000000e+00	0.0000000e+00	0.0000000e+00	0.0000000e+00
24	0.0000000e+00	0.0000000e+00	0.0000000e+00	0.0000000e+00	0.0000000e+00	0.0000000e+00	0.0000000e+00	0.0000000e+00	0.0000000e+00	0.0000000e+00	0.0000000e+00	0.0000000e+00	0.0000000e+00	0.0000000e+00	0.0000000e+00	0.0000000e+00	0.0000000e+00	0.0000000e+00	0.0000000e+00	0.0000000e+00
25	0.0000000e+00	0.0000000e+00	0.0000000e+00	0.0000000e+00	0.0000000e+00	0.0000000e+00	0.0000000e+00	0.0000000e+00	0.0000000e+00	0.0000000e+00	0.0000000e+00	0.0000000e+00	0.0000000e+00	0.0000000e+00	0.0000000e+00	0.0000000e+00	0.0000000e+00	0.0000000e+00	0.0000000e+00	0.0000000e+00
26	0.0000000e+00	0.0000000e+00	0.0000000e+00	0.0000000e+00	0.0000000e+00	0.0000000e+00	0.0000000e+00	0.0000000e+00	0.0000000e+00	0.0000000e+00	0.0000000e+00	0.0000000e+00	0.0000000e+00	0.0000000e+00	0.0000000e+00	0.0000000e+00	0.0000000e+00	0.0000000e+00	0.0000000e+00	0.0000000e+00
27	0.0000000e+00	0.0000000e+00	0.0000000e+00	0.0000000e+00	0.0000000e+00	0.0000000e+00	0.0000000e+00	0.0000000e+00	0.0000000e+00	0.0000000e+00	0.0000000e+00	0.0000000e+00	0.0000000e+00	0.0000000e+00	0.0000000e+00	0.0000000e+00	0.0000000e+00	0.0000000e+00	0.0000000e+00	0.0000000e+00
28	0.0000000e+00	0.0000000e+00	0.0000000e+00	0.0000000e+00	0.0000000e+00	0.0000000e+00	0.0000000e+00	0.0000000e+00	0.0000000e+00	0.0000000e+00	0.0000000e+00	0.0000000e+00	0.0000000e+00	0.0000000e+00	0.0000000e+00	0.0000000e+00	0.0000000e+00	0.0000000e+00	0.0000000e+00	0.0000000e+00
29	0.0000000e+00	0.0000000e+00	0.0000000e+00	0.0000000e+00	0.0000000e+00	0.0000000e+00	0.0000000e+00	0.0000000e+00	0.0000000e+00	0.0000000e+00	0.0000000e+00	0.0000000e+00	0.0000000e+00	0.0000000e+00	0.0000000e+00	0.0000000e+00	0.0000000e+00	0.0000000e+00	0.0000000e+00	0.0000000e+00
30	0.0000000e+00	0.0000000e+00	0.0000000e+00	0.0000000e+00	0.0000000e+00	0.0000000e+00	0.0000000e+00	0.0000000e+00	0.0000000e+00	0.0000000e+00	0.0000000e+00	0.0000000e+00	0.0000000e+00	0.0000000e+00	0.0000000e+00	0.0000000e+00	0.0000000e+00	0.0000000e+00	0.0000000e+00	0.0000000e+00
31	0.0000000e+00	0.0000000e+00	0.0000000e+00	0.0000000e+00	0.0000000e+00	0.0000000e+00	0.0000000e+00	0.0000000e+00	0.0000000e+00	0.0000000e+00	0.0000000e+00	0.0000000e+00	0.0000000e+00	0.0000000e+00	0.0000000e+00	0.0000000e+00	0.0000000e+00	0.0000000e+00	0.0000000e+00	0.0000000e+00
32	0.0000000e+00	0.0000000e+00	0.0000000e+00	0.0000000e+00	0.0000000e+00	0.0000000e+00	0.0000000e+00	0.0000000e+00	0.0000000e+00	0.0000000e+00	0.0000000e+00	0.0000000e+00	0.0000000e+00	0.0000000e+00	0.0000000e+00	0.0000000e+00	0.0000000e+00	0.0000000e+00	0.0000000e+00	0.0000000e+00
33	0.0000000e+00	0.0000000e+00	0.0000000e+00	0.0000000e+00	0.0000000e+00	0.0000000e+00	0.0000000e+00	0.0000000e+00	0.0000000e+00	0.0000000e+00	0.0000000e+00	0.0000000e+00	0.0000000e+00	0.0000000e+00	0.0000000e+00	0.0000000e+00	0.0000000e+00	0.0000000e+00	0.0000000e+00	0.0000000e+00
34	0.0000000e+00	0.0000000e+00	0.0000000e+00	0.0000000e+00	0.0000000e+00	0.0000000e+00	0.0000000e+00	0.0000000e+00	0.0000000e+00	0.0000000e+00	0.0000000e+00	0.0000000e+00	0.0000000e+00	0.0000000e+00	0.0000000e+00	0.0000000e+00	0.0000000e+00	0.0000000e+00	0.0000000e+00	0.0000000e+00
35	0.0000000e+00	0.0000000e+00	0.0000000e+00	0.0000000e+00	0.0000000e+00	0.0000000e+00	0.0000000e+00	0.0000000e+00	0.0000000e+00	0.0000000e+00	0.0000000e+00	0.0000000e+00	0.0000000e+00	0.0000000e+00	0.0000000e+00	0.0000000e+00	0.0000000e+00	0.0000000e+00	0.0000000e+00	0.0000000e+00
36	0.0000000e+00	0.0000000e+00	0.0000000e+00	0.0000000e+00	0.0000000e+00	0.0000000e+00	0.0000000e+00	0.0000000e+00	0.0000000e+00	0.0000000e+00	0.0000000e+00	0.0000000e+00	0.0000000e+00	0.0000000e+00	0.0000000e+00	0.0000000e+00	0.0000000e+00	0.0000000e+00	0.0000000e+00	0.0000000e+00
37	0.0000000e+00	0.0000000e+00	0.0000000e+00	0.0000000e+00	0.0000000e+00	0.0000000e+00	0.0000000e+00	0.0000000e+00	0.0000000e+00	0.0000000e+00	0.0000000e+00	0.0000000e+00	0.0000000e+00	0.0000000e+00	0.0000000e+00	0.0000000e+00	0.0000000e+00	0.0000000e+00	0.0000000e+00	0.0000000e+00
38	0.0000000e+00	0.0000000e+00	0.0000000e+00	0.0000000e+00	0.0000000e+00	0.0000000e+00	0.0000000e+00	0.0000000e+00	0.0000000e+00	0.0000000e+00	0.0000000e+00	0.0000000e+00	0.0000000e+00	0.0000000e+00	0.0000000e+00	0.0000000e+00	0.0000000e+00	0.0000000e+00	0.0000000e+00	0.0000000e+00
39	1.6092047e-04	1.6199434e-04	1.6287598e-04	1.6364079e-04	4.0325347e-05	4.0594451e-05	4.0815382e-05	4.1007036e-05	1.0082593e-05	1.0149877e-05	1.0205117e-05	1.0253036e-05	2.5206531e-06	2.5374743e-06	2.5512842e-06	2.5632641e-06	6.3016244e-07	6.3436772e-07	6.3782020e-07	6.4081517e-07
40	3.4162334e-04	3.4401763e-04	3.4595913e-04	3.4762579e-04	8.5836833e-05	8.6438425e-05	8.6926250e-05	8.7345018e-05	2.1464909e-05	2.1615347e-05	2.1737336e-05	2.1842056e-05	5.3662496e-06	5.4038593e-06	5.4343566e-06	5.4605366e-06	1.3415586e-06	1.3509610e-06	1.3585853e-06	1.3651303e-06
41	5.4399800e-04	5.4801074e-04	5.5121980e-04	5.5395116e-04	1.3709746e-04	1.3810874e-04	1.3891749e-04	1.3960584e-04	3.4288935e-05	3.4541863e-05	3.4744134e-05	3.4916296e-05	8.5722906e-06	8.6355231e-06	8.6860913e-06	8.7291319e-06	2.1430629e-06	2.1588709e-06	2.1715129e-06	2.1822730e-06
42	7.7135900e-04	7.7736600e-04	7.8209976e-04	7.8609512e-04	1.9505862e-04	1.9657765e-04	1.9777470e-04	1.9878504e-04	4.8794204e-05	4.9174191e-05	4.9473637e-05	4.9726373e-05	1.2198666e-05	1.2293664e-05	1.2368526e-05	1.2431711e-05	3.0496468e-06	3.0733961e-06	3.0921115e-06	3.1079075e-06
43	1.0259627e-03	1.0344246e-03	1.0410091e-03	1.0464873e-03	2.6043842e-04	2.6258646e-04	2.6425791e-04	2.6564854e-04	6.5162392e-05	6.5699838e-05	6.6118039e-05	6.6465977e-05	1.6290804e-05	1.6425168e-05	1.6529719e-05	1.6616705e-05	4.0726656e-06	4.1062561e-06	4.1323938e-06	4.1541400e-06
44	1.3115962e-03	1.3230963e-03	1.3319258e-03	1.3391747e-03	3.3439182e-04	3.3732377e-04	3.3957484e-04	3.4142294e-04	8.3685168e-05	8.4418921e-05	8.4982276e-05	8.5444783e-05	2.0921633e-05	2.1105074e-05	2.1245915e-05	2.1361544e-05	5.2303497e-06	5.2762094e-06	5.3114193e-06	5.3403261e-06
45	1.6315665e-03	1.6468711e-03	1.6584133e-03	1.6677728e-03	4.1800974e-04	4.2193081e-04	4.2488793e-04	4.2728584e-04	1.0463905e-04	1.0562060e-04	1.0636085e-04	1.0696110e-04	2.6160297e-05	2.6405689e-05	2.6590755e-05	2.6740822e-05	6.5399823e-06	6.6013295e-06	6.6475953e-06	6.6851117e-06
46	1.9897963e-03	2.0099067e-03	2.0247325e-03	2.0365890e-03	5.1261709e-04	5.1779798e-04	5.2161745e-04	5.2467196e-04	1.2836027e-04	1.2965757e-04	1.3061398e-04	1.3137883e-04	3.2090873e-05	3.2415207e-05	3.2654314e-05	3.2845532e-05	8.0225796e-06	8.1036619e-06	8.1634375e-06	8.2112413e-06
47	2.3896240e-03	2.4157746e-03	2.4345876e-03	2.4494130e-03	6.1947537e-04	6.2625455e-04	6.3113154e-04	6.3497481e-04	1.5517054e-04	1.5686864e-04	1.5809026e-04	1.5905295e-04	3.8793816e-05	3.9218354e-05	3.9523769e-05	3.9764448e-05	9.6982511e-06	9.8043832e-06	9.8807354e-06	9.9409040e-06
48	2.8375923e-03	2.8713519e-03	2.8950343e-03	2.9134621e-03	7.4082597e-04	7.4963978e-04	7.5582266e-04	7.6063372e-04	1.8563935e-04	1.8784795e-04	1.8939728e-04	1.9060286e-04	4.6411532e-05	4.6963702e-05	4.7351049e-05	4.7652455e-05	1.1602592e-05	1.1740631e-05	1.1837465e-05	1.1912815e-05
49	3.3352059e-03	3.3785526e-03	3.4081758e-03	3.4309197e-03	8.7770004e-04	8.8910726e-04	8.9690296e-04	9.0288829e-04	2.2003472e-04	2.2289445e-04	2.2484879e-04	2.2634928e-04	5.5011069e-05	5.5726033e-05	5.6214639e-05	5.6589778e-05	1.3752357e-05	1.3931092e-05	1.4053240e-05	1.4147022e-05
50	3.8906693e-03	3.9460484e-03	3.9830637e-03	4.0109792e-03	1.0331505e-03	1.0478562e-03	1.0576854e-03	1.0650982e-03	2.5913571e-04	2.6282421e-04	2.6528959e-04	2.6714888e-04	6.4787252e-05	6.5709423e-05	6.6325799e-05	6.6790647e-05	1.6196242e-05	1.6426776e-05	1.6580865e-05	1.6697073e-05
51	4.5050513e-03	4.5754058e-03	4.6216483e-03	4.6557393e-03	1.2084868e-03	1.2273595e-03	1.2397641e-03	1.2489091e-03	3.0328706e-04	3.0802343e-04	3.1113655e-04	3.1343161e-04	7.5826335e-05	7.7010500e-05	7.7788826e-05	7.8362626e-05	1.8955798e-05	1.9251827e-05	1.9446401e-05	1.9589845e-05
52	5.1867224e-03	5.2758094e-03	5.3335448e-03	5.3750801e-03	1.4073777e-03	1.4315508e-03	1.4472168e-03	1.4584871e-03	3.5343244e-04	3.5950299e-04	3.6343718e-04	3.6626747e-04	8.8364342e-05	8.9882086e-05	9.0865703e-05	9.1573325e-05	2.2090015e-05	2.2469432e-05	2.2715324e-05	2.2892221e-05
53	5.9387798e-03	6.0509545e-03	6.1229443e-03	6.1734451e-03	1.6323642e-03	1.6631971e-03	1.6829846e-03	1.6968655e-03	4.1023856e-04	4.1798735e-04	4.2296026e-04	4.2644875e-04	1.0256807e-04	1.0450543e-04	1.0574876e-04	1.0662095e-04	2.5640569e-05	2.6124881e-05	2.6435695e-05	2.6653732e-05
54	6.7649247e-03	6.9052475e-03	6.9949931e-03	7.0563253e-03	1.8865927e-03	1.9257257e-03	1.9507538e-03	1.9678580e-03	4.7453319e-04	4.8437629e-04	4.9067159e-04	4.9497380e-04	1.1864464e-04	1.2110565e-04	1.2267962e-04	1.2375528e-04	2.9659210e-05	3.0274422e-05	3.0667890e-05	3.0936787e-05
55	7.6695384e-03	7.8439280e-03	7.9555771e-03	8.0302030e-03	2.1739712e-03	2.2234028e-03	2.2550503e-03	2.2762035e-03	5.4734788e-04	5.5979345e-04	5.6776145e-04	5.7308724e-04	1.3685214e-04	1.3996387e-04	1.4195610e-04	1.4328769e-04	3.4210427e-05	3.4988302e-05	3.5486320e-05	3.5819193e-05
56	8.6561628e-03	8.8713810e-03	9.0099236e-03	9.1009847e-03	2.4988418e-03	2.5609705e-03	2.6009646e-03	2.6272520e-03	6.2983902e-04	6.4549871e-04	6.5557934e-04	6.6220512e-04	1.5747996e-04	1.6139538e-04	1.6391586e-04	1.6557252e-04	3.9366517e-05	4.0345287e-05	4.0975351e-05	4.1389479e-05
57	9.7245972e-03	9.9881495e-03	1.0159706e-02	1.0270888e-02	2.8651200e-03	2.9427694e-03	2.9933143e-03	3.0260714e-03	7.2307325e-04	7.4266970e-04	7.5542577e-04	7.6369272e-04	1.8079510e-04	1.8569494e-04	1.8888443e-04	1.9095148e-04	4.5194171e-05	4.6419006e-05	4.7216297e-05	4.7733006e-05
58	1.0875060e-02	1.1195799e-02	1.1407270e-02	1.1542986e-02	3.2777601e-03	3.3744311e-03	3.4381691e-03	3.4790739e-03	8.2840451e-04	8.5283665e-04	8.6894545e-04	8.7928353e-04	2.0713653e-04	2.1324561e-04	2.1727350e-04	2.1985846e-04	5.1778048e-05	5.3305138e-05	5.4311992e-05	5.4958156e-05
59	1.2107433e-02	1.2495133e-02	1.2754316e-02	1.2920080e-02	3.7427136e-03	3.8625616e-03	3.9426815e-03	3.9939234e-03	9.4747199e-04	9.7781163e-04	9.9809409e-04	1.0110660e-03	2.3691466e-04	2.4450106e-04	2.4957267e-04	2.5281630e-04	5.9220644e-05	6.1116989e-05	6.2384720e-05	6.3195516e-05
60	1.3419711e-02	1.3884458e-02	1.4200162e-02	1.4402285e-02	4.2665548e-03	4.4143127e-03	4.5146851e-03	4.5789463e-03	1.0821145e-03	1.1195899e-03	1.1450471e-03	1.1613455e-03	2.7058997e-04	2.7996095e-04	2.8632669e-04	2.9040222e-04	6.7636949e-05	6.9979329e-05	7.1570516e-05	7.2589238e-05
61	1.4803497e-02	1.5356269e-02	1.5738072e-02	1.5983851e-02	4.8548067e-03	5.0360882e-03	5.1613005e-03	5.2419035e-03	1.2339515e-03	1.2800280e-03	1.3118533e-03	1.3323403e-03	3.0856830e-04	3.2009044e-04	3.2804885e-04	3.3317192e-04	7.7128249e-05	8.0008267e-05	8.1997513e-05	8.3278052e-05
62	1.6249637e-02	1.6902254e-02	1.7360332e-02	1.7658513e-02	5.5140599e-03	5.7355150e-03	5.8909568e-03	5.9921397e-03	1.4049380e-03	1.4613629e-03	1.5009682e-03	1.5267488e-03	3.5133972e-04	3.6545019e-04	3.7535448e-04	3.8180156e-04	8.7816842e-05	9.1343733e-05	9.3819296e-05	9.5430734e-05
63	1.7745685e-02	1.8511240e-02	1.9057192e-02	1.9417154e-02	6.2510488e-03	6.5207213e-03	6.7130370e-03	6.8398361e-03	1.5971453e-03	1.6660468e-03	1.7151835e-03	1.7475807e-03	3.9942365e-04	4.1665493e-04	4.2894333e-04	4.3704543e-04	9.9832309e-05	1.0413911e-04	1.0721049e-04	1.0923553e-04
64	1.9276606e-02	2.0168843e-02	2.0814683e-02	2.1246436e-02	7.0725932e-03	7.3999551e-03	7.6369141e-03	7.7953243e-03	1.8127614e-03	1.8966669e-03	1.9574013e-03	1.9980031e-03	4.5336909e-04	4.7435373e-04	4.8954334e-04	4.9969779e-04	1.1331155e-04	1.1855629e-04	1.2235266e-04	1.2489058e-04
65	2.0821215e-02	2.1855518e-02	2.2612411e-02	2.3126571e-02	7.9833841e-03	8.3799620e-03	8.6701741e-03	8.8673161e-03	2.0535288e-03	2.1555387e-03	2.2301886e-03	2.2808985e-03	5.1361413e-04	5.3912813e-04	5.5779904e-04	5.7048224e-04	1.2836366e-04	1.3474018e-04	1.3940646e-04	1.4257628e-04
66	2.2364218e-02	2.3556922e-02	2.4436552e-02	2.5044118e-02	8.9922421e-03	9.4718063e-03	9.8254895e-03	1.0069781e-02	2.3224178e-03	2.4462744e-03	2.5376198e-03	2.6007127e-03	5.8090468e-04	6.1188483e-04	6.3473300e-04	6.5051437e-04	1.4517456e-04	1.5291685e-04	1.5862686e-04	1.6257080e-04
67	2.3880858e-02	2.5250211e-02	2.6264308e-02	2.6976113e-02	1.0103313e-02	1.0682647e-02	1.1111683e-02	1.1412827e-02	2.6213397e-03	2.7716500e-03	2.8829648e-03	2.9610978e-03	6.5572236e-04	6.9332216e-04	7.2116729e-04	7.4071209e-04	1.6386399e-04	1.7326012e-04	1.8021857e-04	1.8510279e-04
68	2.5346087e-02	2.6910958e-02	2.8071906e-02	2.8899831e-02	1.1319690e-02	1.2018569e-02	1.2537054e-02	1.2906810e-02	2.9521120e-03	3.1343757e-03	3.2695938e-03	3.3660240e-03	7.3852624e-04	7.8412294e-04	8.1795029e-04	8.4207410e-04	1.8454590e-04	1.9593979e-04	2.0439271e-04	2.1042086e-04
69	2.6737106e-02	2.8519448e-02	2.9839498e-02	3.0795009e-02	1.2644949e-02	1.3487883e-02	1.4112183e-02	1.4564079e-02	3.3169131e-03	3.5380243e-03	3.7017852e-03	3.8203226e-03	8.2986683e-04	8.8518718e-04	9.2615894e-04	9.5581611e-04	2.0735693e-04	2.2117970e-04	2.3141722e-04	2.3882759e-04
70	2.8028450e-02	3.0052486e-02	3.1545356e-02	3.2637824e-02	1.4077972e-02	1.5094594e-02	1.5844424e-02	1.6393143e-02	3.7168990e-03	3.9853098e-03	4.1832817e-03	4.3281557e-03	9.3003984e-04	9.9720139e-04	1.0467378e-03	1.0829881e-03	2.3236983e-04	2.4915010e-04	2.6152673e-04	2.7058384e-04
71	2.9197342e-02	3.1490037e-02	3.3169428e-02	3.4407996e-02	1.5616109e-02	1.6842350e-02	1.7740567e-02	1.8403011e-02	4.1530780e-03	4.4791948e-03	4.7180742e-03	4.8942501e-03	1.0393055e-03	1.1209160e-03	1.1806954e-03	1.2247834e-03	2.5964826e-04	2.8003690e-04	2.9497152e-04	3.0598594e-04
72	3.0218741e-02	3.2809623e-02	3.4690961e-02	3.6084216e-02	1.7249513e-02	1.8728444e-02	1.9802353e-02	2.0597653e-02	4.6247396e-03	5.0212536e-03	5.3091775e-03	5.5224041e-03	1.1574949e-03	1.2567357e-03	1.3287983e-03	1.3821653e-03	2.8914849e-04	3.1393938e-04	3.3194099e-04	3.4527237e-04
73	3.1069855e-02	3.3989690e-02	3.6088218e-02	3.7645077e-02	1.8961078e-02	2.0742973e-02	2.2023647e-02	2.2973755e-02	5.1293115e-03	5.6113461e-03	5.9577913e-03	6.2148126e-03	1.2839744e-03	1.4046378e-03	1.4913603e-03	1.5556981e-03	3.2071049e-04	3.5084973e-04	3.7251124e-04	3.8858151e-04
74	3.1741757e-02	3.5019679e-02	3.7354151e-02	3.9083125e-02	2.0741542e-02	2.2883489e-02	2.4408942e-02	2.5538734e-02	5.6666923e-03	6.2518830e-03	6.6686443e-03	6.9773091e-03	1.4187307e-03	1.5652408e-03	1.6695825e-03	1.7468608e-03	3.5432886e-04	3.9091986e-04	4.1697925e-04	4.3627955e-04
75	3.2222231e-02	3.5883905e-02	3.8475212e-02	4.0386484e-02	2.2566623e-02	2.5131052e-02	2.6945856e-02	2.8284403e-02	6.2325593e-03	6.9408155e-03	7.4420370e-03	7.8117233e-03	1.5606940e-03	1.7380483e-03	1.8635591e-03	1.9561321e-03	3.8973427e-04	4.3402294e-04	4.6536531e-04	4.8848253e-04
76	3.2505221e-02	3.6572703e-02	3.9444543e-02	4.1548155e-02	2.4411196e-02	2.7465848e-02	2.9622579e-02	3.1202377e-02	6.8223696e-03	7.6760747e-03	8.2788316e-03	8.7203490e-03	1.7087404e-03	1.9225606e-03	2.0735280e-03	2.1841111e-03	4.2664373e-04	4.8003103e-04	5.1772504e-04	5.4533578e-04
77	3.2581212e-02	3.7076290e-02	4.0255122e-02	4.2563392e-02	2.6239419e-02	2.9859550e-02	3.2419636e-02	3.4278612e-02	7.4283534e-03	8.4532088e-03	9.1779665e-03	9.7042406e-03	1.8609381e-03	2.1176830e-03	2.2992481e-03	2.4310893e-03	4.6457242e-04	5.2866731e-04	5.7399398e-04	6.0690738e-04
78	3.2443626e-02	3.7389126e-02	4.0902823e-02	4.3428169e-02	2.8008924e-02	3.2278426e-02	3.5311839e-02	3.7491996e-02	8.0403902e-03	9.2660161e-03	1.0136804e-02	1.0762651e-02	2.0147649e-03	2.3218829e-03	2.5400852e-03	2.6969104e-03	5.0288844e-04	5.7954556e-04	6.3400920e-04	6.7315301e-04
79	3.2093348e-02	3.7513158e-02	4.1387085e-02	4.4146019e-02	2.9680179e-02	3.4692462e-02	3.8275099e-02	4.0826583e-02	8.6487239e-03	1.0109290e-02	1.1153261e-02	1.1896756e-02	2.1677898e-03	2.5338784e-03	2.7955482e-03	2.9819042e-03	5.4098265e-04	6.3234188e-04	6.9764286e-04	7.4414893e-04
80	3.1531969e-02	3.7449687e-02	4.1705399e-02	4.4717097e-02	3.1201505e-02	3.7057204e-02	4.1268315e-02	4.4248449e-02	9.2387407e-03	1.0972608e-02	1.2219515e-02	1.3101930e-02	2.3163591e-03	2.7510785e-03	3.0637059e-03	3.2849472e-03	5.7794166e-04	6.8640605e-04	7.6440794e-04	8.1960861e-04
81	3.0764244e-02	3.7202674e-02	4.1857964e-02	4.5144824e-02	3.2522227e-02	3.9328572e-02	4.4249883e-02	4.7724566e-02	9.7949662e-03	1.1844885e-02	1.3327074e-02	1.4373570e-02	2.4565992e-03	2.9707234e-03	3.3424596e-03	3.6049232e-03	6.1279791e-04	7.4104603e-04	8.3377551e-04	8.9924699e-04
82	2.9792939e-02	3.6772360e-02	4.1845672e-02	4.5433419e-02	3.3593400e-02	4.1463134e-02	4.7183610e-02	5.1229019e-02	1.0301564e-02	1.2714853e-02	1.4469062e-02	1.5709604e-02	2.5845426e-03	3.1900086e-03	3.6301193e-03	3.9413570e-03	6.4456098e-04	7.9555860e-04	9.0531812e-04	9.8293791e-04
83	2.8622771e-02	3.6156615e-02	4.1668099e-02	4.5583920e-02	3.4356165e-02	4.3399104e-02	5.0014587e-02	5.4714782e-02	1.0737174e-02	1.3563322e-02	1.5630829e-02	1.7099759e-02	2.6948245e-03	3.4041334e-03	3.9230378e-03	4.2917111e-03	6.7189391e-04	8.4874414e-04	9.7812129e-04	1.0700417e-03
84	2.7268605e-02	3.5357741e-02	4.1328830e-02	4.5596796e-02	3.4762359e-02	4.5074490e-02	5.2686509e-02	5.8127365e-02	1.1081402e-02	1.4368661e-02	1.6795189e-02	1.8529603e-02	2.7823103e-03	3.6076728e-03	4.2169238e-03	4.6523991e-03	6.9351923e-04	8.9924926e-04	1.0511113e-03	1.1596579e-03
85	2.5752478e-02	3.4383723e-02	4.0836640e-02	4.5477239e-02	3.4789887e-02	4.6450125e-02	5.5167588e-02	6.1436728e-02	1.1321523e-02	1.5116065e-02	1.7952951e-02	1.9993090e-02	2.8437867e-03	3.7969152e-03	4.5094959e-03	5.0219466e-03	7.0863914e-04	9.4614786e-04	1.1237148e-03	1.2514117e-03
86	2.4094565e-02	3.3240820e-02	4.0197554e-02	1.6694529e-02	3.4416459e-02	4.7480887e-02	5.7417824e-02	6.4602701e-02	1.1442894e-02	1.5786597e-02	1.9090462e-02	2.1479313e-02	2.8755476e-03	3.9671005e-03	4.7973467e-03	5.3976541e-03	7.1633491e-04	9.8825440e-04	1.1950791e-03	1.3446232e-03
87	2.2314089e-02	3.1928401e-02	2.3872807e-02	0.0000000e+00	3.3619251e-02	4.8104537e-02	5.9373712e-02	6.7565227e-02	1.1428205e-02	1.6352195e-02	2.0182930e-02	2.2967475e-02	2.8732006e-03	4.1111560e-03	5.0742530e-03	5.7743241e-03	7.1551961e-04	1.0238104e-03	1.2636527e-03	1.4379929e-03
88	2.0432679e-02	3.0452181e-02	0.0000000e+00	0.0000000e+00	3.2396350e-02	4.8282436e-02	6.0990930e-02	7.0287999e-02	1.1266906e-02	1.6791820e-02	2.1211621e-02	2.4444985e-02	2.8340467e-03	4.2237684e-03	5.3355129e-03	6.1488245e-03	7.0552908e-04	1.0514969e-03	1.3282630e-03	1.5307350e-03
89	1.8474417e-02	2.8825446e-02	0.0000000e+00	0.0000000e+00	3.0747485e-02	4.7974989e-02	6.2206599e-02	7.2711829e-02	1.0946111e-02	1.7079106e-02	2.2145562e-02	2.5885426e-02	2.7547781e-03	4.2982524e-03	5.5733137e-03	6.5145151e-03	6.8555122e-04	1.0696586e-03	1.3869691e-03	1.6211955e-03
90	1.6470308e-02	5.8583131e-03	0.0000000e+00	0.0000000e+00	2.8706036e-02	4.7176042e-02	6.2987646e-02	1.5928095e-02	1.0465868e-02	1.7199805e-02	2.2964521e-02	2.7274355e-02	2.6353405e-03	4.3309684e-03	5.7825433e-03	6.8677740e-03	6.5558395e-04	1.0773991e-03	1.4385020e-03	1.7084708e-03
91	1.4456306e-02	0.0000000e+00	0.0000000e+00	0.0000000e+00	2.6324523e-02	4.5882292e-02	3.0977164e-02	0.0000000e+00	9.8333096e-03	1.7138954e-02	2.3644871e-02	2.8593338e-02	2.4774567e-03	4.3180799e-03	5.9572156e-03	7.2039588e-03	6.1606838e-04	1.0737756e-03	1.4813789e-03	1.7914061e-03
92	1.2472912e-02	0.0000000e+00	0.0000000e+00	0.0000000e+00	2.3678798e-02	4.4100670e-02	0.0000000e+00	0.0000000e+00	9.0658801e-03	1.6884784e-02	2.4159810e-02	2.9819591e-02	2.2854491e-03	4.2565436e-03	6.0905302e-03	7.5173239e-03	5.6809176e-04	1.0580447e-03	1.5139169e-03	1.8685736e-03
93	1.0561991e-02	0.0000000e+00	0.0000000e+00	0.0000000e+00	2.0860918e-02	4.1846528e-02	0.0000000e+00	0.0000000e+00	8.1894563e-03	1.6427863e-02	2.4483537e-02	3.0927887e-02	2.0657719e-03	4.1438915e-03	6.1759172e-03	7.8014898e-03	5.1327030e-04	1.0296085e-03	1.5344941e-03	1.9383907e-03
94	8.7629937e-03	0.0000000e+00	0.0000000e+00	0.0000000e+00	1.7969673e-02	2.2986158e-02	0.0000000e+00	0.0000000e+00	7.2351044e-03	1.5761192e-02	2.4592029e-02	3.1887167e-02	1.8261967e-03	3.9782477e-03	6.2072197e-03	8.0485694e-03	4.5354606e-04	9.8801984e-04	1.5415973e-03	1.9989067e-03
95	7.1123771e-03	0.0000000e+00	0.0000000e+00	0.0000000e+00	1.5113694e-02	0.0000000e+00	0.0000000e+00	0.0000000e+00	6.2425796e-03	1.4891377e-02	2.4472771e-02	3.2675107e-02	1.5767117e-03	3.7611709e-03	6.1811794e-03	8.2528742e-03	3.9140763e-04	9.3368430e-04	1.5344344e-03	2.0487181e-03
96	5.6372141e-03	0.0000000e+00	0.0000000e+00	0.0000000e+00	1.2390204e-02	0.0000000e+00	0.0000000e+00	0.0000000e+00	5.2508930e-03	1.3833125e-02	2.4110428e-02	3.3262704e-02	1.3271388e-03	3.4962581e-03	6.0937985e-03	8.4069938e-03	3.2929859e-04	8.6751505e-04	1.5120342e-03	2.0859998e-03
97	4.3611285e-03	0.0000000e+00	0.0000000e+00	0.0000000e+00	9.8968162e-03	0.0000000e+00	0.0000000e+00	0.0000000e+00	4.3038690e-03	1.2614268e-02	2.3493493e-02	3.3615966e-02	1.0885450e-03	3.1904312e-03	5.9420311e-03	8.5022316e-03	2.6996662e-04	7.9124881e-04	1.4736644e-03	2.1086117e-03
98	3.4387062e-03	0.0000000e+00	0.0000000e+00	0.0000000e+00	7.7040941e-03	0.0000000e+00	0.0000000e+00	0.0000000e+00	3.4387062e-03	1.1278223e-02	2.2623860e-02	3.3717843e-02	8.7035736e-04	2.8545866e-03	5.7262358e-03	8.5341902e-03	2.1574651e-04	7.0760256e-04	1.4194346e-03	2.1154779e-03
99	2.6778253e-03	0.0000000e+00	0.0000000e+00	0.0000000e+00	5.8448901e-03	0.0000000e+00	0.0000000e+00	0.0000000e+00	2.6778253e-03	9.8669138e-03	2.1494414e-02	3.3537516e-02	6.7828025e-04	2.4992417e-03	5.4444314e-03	8.4948911e-03	1.6804726e-04	6.1919940e-04	1.3488846e-03	2.1046510e-03
100	2.0352178e-03	0.0000000e+00	0.0000000e+00	0.0000000e+00	4.3274755e-03	0.0000000e+00	0.0000000e+00	0.0000000e+00	2.0352178e-03	8.4349734e-03	2.0121228e-02	3.3067607e-02	5.1590789e-04	2.1381837e-03	5.1005355e-03	8.3823166e-03	1.2775079e-04	5.2946400e-04	1.2630112e-03	2.0756565e-03
101	1.5110375e-03	0.0000000e+00	0.0000000e+00	0.0000000e+00	3.1295727e-03	0.0000000e+00	0.0000000e+00	0.0000000e+00	1.5110375e-03	7.0344344e-03	1.8531746e-02	3.2299882e-02	3.8333755e-04	1.7845771e-03	4.7013485e-03	8.1942092e-03	9.4871258e-05	4.4166055e-04	1.1635251e-03	2.0279645e-03
102	1.0941364e-03	0.0000000e+00	0.0000000e+00	0.0000000e+00	2.2077122e-03	0.0000000e+00	0.0000000e+00	0.0000000e+00	1.0941364e-03	5.7175075e-03	1.6757520e-02	3.1210108e-02	2.7779826e-04	1.4516596e-03	4.2546888e-03	7.9241617e-03	6.8713131e-05	3.5906660e-04	1.0523931e-03	1.9600337e-03
103	7.7115993e-04	0.0000000e+00	0.0000000e+00	0.0000000e+00	1.5157086e-03	0.0000000e+00	0.0000000e+00	0.0000000e+00	7.7115993e-04	4.5320741e-03	1.4864237e-02	2.9817321e-02	1.9595936e-04	1.1516448e-03	3.7771496e-03	7.5768761e-03	4.8442336e-05	2.8469355e-04	9.3373416e-04	1.8730495e-03
104	5.2777231e-04	0.0000000e+00	0.0000000e+00	0.0000000e+00	1.0105131e-03	0.0000000e+00	0.0000000e+00	0.0000000e+00	5.2777231e-04	3.5029015e-03	1.2907051e-02	2.8117149e-02	1.3422730e-04	8.9088611e-04	3.2826251e-03	7.1509797e-03	3.3162125e-05	2.2010184e-04	8.1100358e-04	1.7667172e-03
105	3.5008387e-04	0.0000000e+00	0.0000000e+00	0.0000000e+00	6.5293190e-04	0.0000000e+00	0.0000000e+00	0.0000000e+00	3.5008387e-04	2.6437533e-03	1.0957053e-02	2.6137529e-02	8.9114854e-05	6.7297498e-04	2.7891492e-03	6.6533830e-03	2.2003224e-05	1.6616331e-04	6.8866495e-04	1.6427775e-03
106	2.2429344e-04	0.0000000e+00	0.0000000e+00	0.0000000e+00	4.0751507e-04	0.0000000e+00	0.0000000e+00	0.0000000e+00	2.2429344e-04	1.9495506e-03	9.0758738e-03	2.3909781e-02	5.7146256e-05	4.9671322e-04	2.3123824e-03	6.0918164e-03	1.4101072e-05	1.2256601e-04	5.7058979e-04	1.5031805e-03
107	1.3808815e-04	0.0000000e+00	0.0000000e+00	0.0000000e+00	2.4439083e-04	0.0000000e+00	0.0000000e+00	0.0000000e+00	1.3808815e-04	1.4034587e-03	7.3338984e-03	2.1495022e-02	3.5215407e-05	3.5791172e-04	1.8702996e-03	5.4816865e-03	8.6839411e-06	8.8259218e-05	4.6120642e-04	1.3517561e-03
108	8.1946275e-05	0.0000000e+00	0.0000000e+00	0.0000000e+00	1.4129034e-04	0.0000000e+00	0.0000000e+00	0.0000000e+00	8.1946275e-05	9.8335530e-04	5.7791373e-03	1.8954338e-02	2.0917983e-05	2.5101579e-04	1.4752091e-03	4.8383715e-03	5.1548654e-06	6.1858385e-05	3.6353910e-04	1.1923307e-03
109	4.6044400e-05	0.0000000e+00	0.0000000e+00	0.0000000e+00	7.7342261e-05	0.0000000e+00	0.0000000e+00	0.0000000e+00	4.6044400e-05	6.6937047e-04	4.4427090e-03	1.6369935e-02	1.1765028e-05	1.7103410e-04	1.1351782e-03	4.1827617e-03	2.8973168e-06	4.2119743e-05	2.7955485e-04	1.0300685e-03
110	2.4667240e-05	0.0000000e+00	0.0000000e+00	0.0000000e+00	4.0372972e-05	0.0000000e+00	0.0000000e+00	0.0000000e+00	2.4667240e-05	4.4160376e-04	3.3348905e-03	1.3821476e-02	6.3091540e-06	1.1294924e-04	8.5296684e-04	3.5351267e-03	1.5526494e-06	2.7796211e-05	2.0991063e-04	8.6997597e-04
111	1.2570400e-05	0.0000000e+00	0.0000000e+00	0.0000000e+00	2.0044904e-05	0.0000000e+00	0.0000000e+00	0.0000000e+00	1.2570400e-05	2.8157696e-04	2.4474569e-03	1.1393811e-02	3.2184574e-06	7.2093446e-05	6.2663366e-04	2.9172098e-03	7.9147962e-07	1.7729143e-05	1.5410108e-04	7.1739713e-04
112	5.9029200e-06	0.0000000e+00	0.0000000e+00	0.0000000e+00	9.1727477e-06	0.0000000e+00	0.0000000e+00	0.0000000e+00	5.9029200e-06	1.7249644e-04	1.7531672e-03	9.1613318e-03	1.5129416e-06	4.4211514e-05	4.4934364e-04	2.3480853e-03	3.7179011e-07	1.0864533e-05	1.1042166e-04	5.7701826e-04
113	2.7360800e-06	0.0000000e+00	0.0000000e+00	0.0000000e+00	4.1429895e-06	0.0000000e+00	0.0000000e+00	0.0000000e+00	2.7360800e-06	1.0191898e-04	1.2230278e-03	7.1876822e-03	7.0202753e-07	2.6150526e-05	3.1380631e-04	1.8442263e-03	1.7238683e-07	6.4214094e-06	7.7056912e-05	4.5286020e-04
114	7.1272000e-07	0.0000000e+00	0.0000000e+00	0.0000000e+00	1.0517803e-06	0.0000000e+00	0.0000000e+00	0.0000000e+00	7.1272000e-07	5.7017600e-05	8.2889336e-04	5.5014857e-03	1.8307299e-07	1.4645839e-05	2.1291389e-04	1.4131404e-03	4.4920182e-08	3.5936145e-06	5.2242171e-05	3.4673888e-04
115	0.0000000e+00	0.0000000e+00	0.0000000e+00	0.0000000e+00	0.0000000e+00	0.0000000e+00	0.0000000e+00	0.0000000e+00	0.0000000e+00	3.0434915e-05	5.4485921e-04	4.1146520e-03	0.0000000e+00	7.8265962e-06	1.4011516e-04	1.0581176e-03	0.0000000e+00	1.9188745e-06	3.4352533e-05	2.5942247e-04
116	0.0000000e+00	0.0000000e+00	0.0000000e+00	0.0000000e+00	0.0000000e+00	0.0000000e+00	0.0000000e+00	0.0000000e+00	0.0000000e+00	1.5448400e-05	3.4604416e-04	3.0078035e-03	0.0000000e+00	3.9773056e-06	8.9091646e-05	7.7438141e-04	0.0000000e+00	9.7434457e-07	2.1825318e-05	1.8970489e-04
117	0.0000000e+00	0.0000000e+00	0.0000000e+00	0.0000000e+00	0.0000000e+00	0.0000000e+00	0.0000000e+00	0.0000000e+00	0.0000000e+00	7.2318150e-06	2.1132970e-04	2.1478491e-03	0.0000000e+00	1.8641246e-06	5.4473863e-05	5.5364501e-04	0.0000000e+00	4.5628501e-07	1.3333662e-05	1.3551665e-04
118	0.0000000e+00	0.0000000e+00	0.0000000e+00	0.0000000e+00	0.0000000e+00	0.0000000e+00	0.0000000e+00	0.0000000e+00	0.0000000e+00	3.3404400e-06	1.2443139e-04	1.4931767e-03	0.0000000e+00	8.6210832e-07	3.2113535e-05	3.8536242e-04	0.0000000e+00	2.1084088e-07	7.8538229e-06	9.4245875e-05
119	0.0000000e+00	0.0000000e+00	0.0000000e+00	0.0000000e+00	0.0000000e+00	0.0000000e+00	0.0000000e+00	0.0000000e+00	0.0000000e+00	8.6768500e-07	6.9414800e-05	1.0091177e-03	0.0000000e+00	2.2421686e-07	1.7937349e-05	2.6076421e-04	0.0000000e+00	5.4787401e-08	4.3829921e-06	6.3717747e-05
120	0.0000000e+00	0.0000000e+00	0.0000000e+00	0.0000000e+00	0.0000000e+00	0.0000000e+00	0.0000000e+00	0.0000000e+00	0.0000000e+00	0.0000000e+00	3.6936285e-05	6.6124959e-04	0.0000000e+00	0.0000000e+00	9.5569350e-06	1.7109245e-04	0.0000000e+00	0.0000000e+00	2.3331494e-06	4.1769066e-05
