# Supplementary material for: Quantifying the Potential for Future Gene Therapy to Lower Lifetime Risk of Polygenic Late-Onset Diseases
Source: MDPI journal article supplement (doi:10.3390/ijms20133352), 2019-07-08
Supplement: s2 [file s2 › SuppFiles/Results/LODsCommonLow/Stroke/EnvironmentArray.csv]

Age	Env	Incidence	CasesExpected
0	0	-0.000265226	0
1	0	-0.000264834	0
2	0	-0.000264392	0
3	0	-0.000263892	0
4	0	-0.000263328	0
5	0	-0.000262691	0
6	0	-0.000261972	0
7	0	-0.00026116	0
8	0	-0.000260244	0
9	0	-0.00025921	0
10	0	-0.000258043	0
11	0	-0.000256726	0
12	0	-0.000255238	0
13	0	-0.000253559	0
14	0	-0.000251664	0
15	0	-0.000249525	0
16	0	-0.000247111	0
17	0	-0.000244386	0
18	0	-0.00024131	0
19	0	-0.000237838	0
20	0	-0.000233919	0
21	0	-0.000229496	0
22	0	-0.000224505	0
23	0	-0.000218871	0
24	0	-0.000212513	0
25	0	-0.000205339	0
26	0	-0.000197242	0
27	0	-0.000188106	0
28	0	-0.000177797	0
29	0	-0.000166165	0
30	0	-0.000153042	0
31	0	-0.000138238	0
32	0	-0.000121538	0
33	0	-0.000102701	0
34	0	-8.14572e-05	0
35	0	-5.75006e-05	0
36	0	-3.0489e-05	0
37	0	-3.7228e-08	0
38	1.03834e-05	3.42868e-05	857
39	2.21395e-05	7.2968e-05	1824
40	3.54241e-05	0.00011655	2913
41	5.04967e-05	0.000165642	4140
42	6.75608e-05	0.000220924	5520
43	8.69375e-05	0.000283159	7074
44	0.00010894	0.000353195	8821
45	0.00013395	0.00043198	10786
46	0.000162342	0.000520567	12992
47	0.000194762	0.000620126	15469
48	0.000231557	0.000731953	18247
49	0.000273627	0.00085748	21360
50	0.000321437	0.000998286	24847
51	0.000376118	0.00115611	28746
52	0.000438528	0.00133284	33102
53	0.000509741	0.00153055	37962
54	0.000591098	0.00175148	43376
55	0.000684128	0.00199806	49396
56	0.000790339	0.00227288	56077
57	0.000911647	0.0025787	63478
58	0.00105036	0.00291843	71656
59	0.00120908	0.0032951	80668
60	0.00139036	0.00371185	90571
61	0.00159731	0.00417187	101418
62	0.00183346	0.00467831	113255
63	0.00210263	0.00523429	126122
64	0.00240845	0.00584273	140046
65	0.00275635	0.00650632	155040
66	0.00315116	0.00722733	171100
67	0.00359814	0.00800758	188202
68	0.00410377	0.00884822	206296
69	0.00467411	0.00974965	225302
70	0.00531611	0.0107114	245115
71	0.00603614	0.0117319	265591
72	0.00683931	0.0128085	286562
73	0.00773499	0.0139376	307830
74	0.00872828	0.0151141	329164
75	0.00982569	0.016332	350306
76	0.011033	0.0175841	371009
77	0.0123551	0.0188623	390973
78	0.0137991	0.0201578	409943
79	0.0153664	0.0214613	427653
80	0.0170592	0.0227634	443863
81	0.0188848	0.0240544	458356
82	0.0208418	0.0253253	470966
83	0.0229253	0.0265674	481556
84	0.0251419	0.0277729	490033
85	0.0274944	0.028935	496350
86	0.0299768	0.030048	500537
87	0.0325944	0.0311073	502607
88	0.0353334	0.0321094	502665
89	0.0381959	0.0330522	500822
90	0.0411806	0.0339344	497210
91	0.0442897	0.0347559	491982
92	0.0475247	0.0355173	485302
93	0.0508762	0.0362199	477324
94	0.0543471	0.0368658	468241
95	0.0579313	0.0374574	458211
96	0.0616247	0.0379974	447412
97	0.0654493	0.0384888	435984
98	0.0693827	0.0389348	424059
99	0.0734338	0.0393386	411790
100	0.0776085	0.0397032	399247
101	0.0818658	0.0400319	386574
102	0.0862595	0.0403276	373843
103	0.0907605	0.0405932	361121
104	0.0953907	0.0408314	348497
105	0.100131	0.0410448	336008
106	0.10501	0.0412356	323702
107	0.109995	0.0414062	311639
108	0.115111	0.0415584	299821
109	0.120328	0.0416942	288308
110	0.125704	0.0418153	277097
111	0.131176	0.0419231	266183
112	0.136804	0.042019	255611
113	0.142544	0.0421044	245366
114	0.148463	0.0421803	235465
115	0.154484	0.0422478	225897
116	0.160707	0.0423077	216660
117	0.167022	0.042361	207753
118	0.173537	0.0424082	199176
119	0.180177	0.0424502	190915
