# Supplementary material for: Quantifying the Potential for Future Gene Therapy to Lower Lifetime Risk of Polygenic Late-Onset Diseases
Source: MDPI journal article supplement (doi:10.3390/ijms20133352), 2019-07-08
Supplement: s2 [file s2 › SuppFiles/Results/LODsCommonLow/Stroke/EnvironmentArraySD.csv]

Age	Env	EnvSD	Incidence	CasesExpected
0	0	0	-0.000265226	0
1	0	0	-0.000264834	0
2	0	0	-0.000264392	0
3	0	0	-0.000263892	0
4	0	0	-0.000263328	0
5	0	0	-0.000262691	0
6	0	0	-0.000261972	0
7	0	0	-0.00026116	0
8	0	0	-0.000260244	0
9	0	0	-0.00025921	0
10	0	0	-0.000258043	0
11	0	0	-0.000256726	0
12	0	0	-0.000255238	0
13	0	0	-0.000253559	0
14	0	0	-0.000251664	0
15	0	0	-0.000249525	0
16	0	0	-0.000247111	0
17	0	0	-0.000244386	0
18	0	0	-0.00024131	0
19	0	0	-0.000237838	0
20	0	0	-0.000233919	0
21	0	0	-0.000229496	0
22	0	0	-0.000224505	0
23	0	0	-0.000218871	0
24	0	0	-0.000212513	0
25	0	0	-0.000205339	0
26	0	0	-0.000197242	0
27	0	0	-0.000188106	0
28	0	0	-0.000177797	0
29	0	0	-0.000166165	0
30	0	0	-0.000153042	0
31	0	0	-0.000138238	0
32	0	0	-0.000121538	0
33	0	0	-0.000102701	0
34	0	0	-8.14572e-05	0
35	0	0	-5.75006e-05	0
36	0	0	-3.0489e-05	0
37	0	0	-3.7228e-08	0
38	1.03834e-05	1.949e-08	3.42868e-05	857
39	2.21395e-05	2.255e-08	7.2968e-05	1824
40	3.54241e-05	2.396e-08	0.00011655	2913
41	5.04967e-05	3.453e-08	0.000165642	4140
42	6.75608e-05	2.807e-08	0.000220924	5520
43	8.69375e-05	5.581e-08	0.000283159	7074
44	0.00010894	4.76e-08	0.000353195	8821
45	0.00013395	8.178e-08	0.00043198	10786
46	0.000162342	6.42e-08	0.000520567	12992
47	0.000194762	6.794e-08	0.000620126	15469
48	0.000231557	6.914e-08	0.000731953	18247
49	0.000273627	1.197e-07	0.00085748	21360
50	0.000321437	1.644e-07	0.000998286	24847
51	0.000376118	7.961e-08	0.00115611	28746
52	0.000438528	1.085e-07	0.00133284	33102
53	0.000509741	1.229e-07	0.00153055	37962
54	0.000591098	1.82e-07	0.00175148	43376
55	0.000684128	1.546e-07	0.00199806	49396
56	0.000790339	2.649e-07	0.00227288	56077
57	0.000911647	1.689e-07	0.0025787	63478
58	0.00105036	1.581e-07	0.00291843	71656
59	0.00120908	2.831e-07	0.0032951	80668
60	0.00139036	2.36e-07	0.00371185	90571
61	0.00159731	2.42e-07	0.00417187	101418
62	0.00183346	3.163e-07	0.00467831	113255
63	0.00210263	2.206e-07	0.00523429	126122
64	0.00240845	2.887e-07	0.00584273	140046
65	0.00275635	3.421e-07	0.00650632	155040
66	0.00315116	2.233e-07	0.00722733	171100
67	0.00359814	4.795e-07	0.00800758	188202
68	0.00410377	4.358e-07	0.00884822	206296
69	0.00467411	6.886e-07	0.00974965	225302
70	0.00531611	7.952e-07	0.0107114	245115
71	0.00603614	7.683e-07	0.0117319	265591
72	0.00683931	5.21e-07	0.0128085	286562
73	0.00773499	9.254e-07	0.0139376	307830
74	0.00872828	7.995e-07	0.0151141	329164
75	0.00982569	7.178e-07	0.016332	350306
76	0.011033	7.79e-07	0.0175841	371009
77	0.0123551	9.037e-07	0.0188623	390973
78	0.0137991	1.033e-06	0.0201578	409943
79	0.0153664	1.785e-06	0.0214613	427653
80	0.0170592	1.103e-06	0.0227634	443863
81	0.0188848	1.316e-06	0.0240544	458356
82	0.0208418	1.804e-06	0.0253253	470966
83	0.0229253	2.011e-06	0.0265674	481556
84	0.0251419	1.922e-06	0.0277729	490033
85	0.0274944	1.889e-06	0.028935	496350
86	0.0299768	2.761e-06	0.030048	500537
87	0.0325944	2.085e-06	0.0311073	502607
88	0.0353334	2.642e-06	0.0321094	502665
89	0.0381959	3.755e-06	0.0330522	500822
90	0.0411806	3.731e-06	0.0339344	497210
91	0.0442897	3.668e-06	0.0347559	491982
92	0.0475247	1.739e-06	0.0355173	485302
93	0.0508762	3.271e-06	0.0362199	477324
94	0.0543471	4.339e-06	0.0368658	468241
95	0.0579313	5.013e-06	0.0374574	458211
96	0.0616247	4.856e-06	0.0379974	447412
97	0.0654493	6.289e-06	0.0384888	435984
98	0.0693827	5.478e-06	0.0389348	424059
99	0.0734338	5.264e-06	0.0393386	411790
100	0.0776085	4.561e-06	0.0397032	399247
101	0.0818658	1.035e-05	0.0400319	386574
102	0.0862595	6.446e-06	0.0403276	373843
103	0.0907605	1.146e-05	0.0405932	361121
104	0.0953907	1.055e-05	0.0408314	348497
105	0.100131	8.604e-06	0.0410448	336008
106	0.10501	7.467e-06	0.0412356	323702
107	0.109995	3.655e-05	0.0414062	311639
108	0.115111	1.396e-05	0.0415584	299821
109	0.120328	3.613e-05	0.0416942	288308
110	0.125704	1.415e-05	0.0418153	277097
111	0.131176	3.3e-05	0.0419231	266183
112	0.136804	1.484e-05	0.042019	255611
113	0.142544	4.01e-05	0.0421044	245366
114	0.148463	1.579e-05	0.0421803	235465
115	0.154484	3.56e-05	0.0422478	225897
116	0.160707	1.53e-05	0.0423077	216660
117	0.167022	3.296e-05	0.042361	207753
118	0.173537	2.119e-05	0.0424082	199176
119	0.180177	4.634e-05	0.0424502	190915
