# Supplementary material for: Quantifying the Potential for Future Gene Therapy to Lower Lifetime Risk of Polygenic Late-Onset Diseases
Source: MDPI journal article supplement (doi:10.3390/ijms20133352), 2019-07-08
Supplement: s2 [file s2 › SuppFiles/Results/LODsCommonLow/Stroke/LifetimeRiskPostAnalysis.csv]

age	A..1..	A..2..	A..3..	A..4..	A..5..	A..6..	A..7..	A..8..	A..9..	A..10..	A..11..	A..12..	A..13..	A..14..	A..15..	A..16..	A..17..	A..18..	A..19..	A..20..
1	0.0000000e+00	0.0000000e+00	0.0000000e+00	0.0000000e+00	0.0000000e+00	0.0000000e+00	0.0000000e+00	0.0000000e+00	0.0000000e+00	0.0000000e+00	0.0000000e+00	0.0000000e+00	0.0000000e+00	0.0000000e+00	0.0000000e+00	0.0000000e+00	0.0000000e+00	0.0000000e+00	0.0000000e+00	0.0000000e+00
2	0.0000000e+00	0.0000000e+00	0.0000000e+00	0.0000000e+00	0.0000000e+00	0.0000000e+00	0.0000000e+00	0.0000000e+00	0.0000000e+00	0.0000000e+00	0.0000000e+00	0.0000000e+00	0.0000000e+00	0.0000000e+00	0.0000000e+00	0.0000000e+00	0.0000000e+00	0.0000000e+00	0.0000000e+00	0.0000000e+00
3	0.0000000e+00	0.0000000e+00	0.0000000e+00	0.0000000e+00	0.0000000e+00	0.0000000e+00	0.0000000e+00	0.0000000e+00	0.0000000e+00	0.0000000e+00	0.0000000e+00	0.0000000e+00	0.0000000e+00	0.0000000e+00	0.0000000e+00	0.0000000e+00	0.0000000e+00	0.0000000e+00	0.0000000e+00	0.0000000e+00
4	0.0000000e+00	0.0000000e+00	0.0000000e+00	0.0000000e+00	0.0000000e+00	0.0000000e+00	0.0000000e+00	0.0000000e+00	0.0000000e+00	0.0000000e+00	0.0000000e+00	0.0000000e+00	0.0000000e+00	0.0000000e+00	0.0000000e+00	0.0000000e+00	0.0000000e+00	0.0000000e+00	0.0000000e+00	0.0000000e+00
5	0.0000000e+00	0.0000000e+00	0.0000000e+00	0.0000000e+00	0.0000000e+00	0.0000000e+00	0.0000000e+00	0.0000000e+00	0.0000000e+00	0.0000000e+00	0.0000000e+00	0.0000000e+00	0.0000000e+00	0.0000000e+00	0.0000000e+00	0.0000000e+00	0.0000000e+00	0.0000000e+00	0.0000000e+00	0.0000000e+00
6	0.0000000e+00	0.0000000e+00	0.0000000e+00	0.0000000e+00	0.0000000e+00	0.0000000e+00	0.0000000e+00	0.0000000e+00	0.0000000e+00	0.0000000e+00	0.0000000e+00	0.0000000e+00	0.0000000e+00	0.0000000e+00	0.0000000e+00	0.0000000e+00	0.0000000e+00	0.0000000e+00	0.0000000e+00	0.0000000e+00
7	0.0000000e+00	0.0000000e+00	0.0000000e+00	0.0000000e+00	0.0000000e+00	0.0000000e+00	0.0000000e+00	0.0000000e+00	0.0000000e+00	0.0000000e+00	0.0000000e+00	0.0000000e+00	0.0000000e+00	0.0000000e+00	0.0000000e+00	0.0000000e+00	0.0000000e+00	0.0000000e+00	0.0000000e+00	0.0000000e+00
8	0.0000000e+00	0.0000000e+00	0.0000000e+00	0.0000000e+00	0.0000000e+00	0.0000000e+00	0.0000000e+00	0.0000000e+00	0.0000000e+00	0.0000000e+00	0.0000000e+00	0.0000000e+00	0.0000000e+00	0.0000000e+00	0.0000000e+00	0.0000000e+00	0.0000000e+00	0.0000000e+00	0.0000000e+00	0.0000000e+00
9	0.0000000e+00	0.0000000e+00	0.0000000e+00	0.0000000e+00	0.0000000e+00	0.0000000e+00	0.0000000e+00	0.0000000e+00	0.0000000e+00	0.0000000e+00	0.0000000e+00	0.0000000e+00	0.0000000e+00	0.0000000e+00	0.0000000e+00	0.0000000e+00	0.0000000e+00	0.0000000e+00	0.0000000e+00	0.0000000e+00
10	0.0000000e+00	0.0000000e+00	0.0000000e+00	0.0000000e+00	0.0000000e+00	0.0000000e+00	0.0000000e+00	0.0000000e+00	0.0000000e+00	0.0000000e+00	0.0000000e+00	0.0000000e+00	0.0000000e+00	0.0000000e+00	0.0000000e+00	0.0000000e+00	0.0000000e+00	0.0000000e+00	0.0000000e+00	0.0000000e+00
11	0.0000000e+00	0.0000000e+00	0.0000000e+00	0.0000000e+00	0.0000000e+00	0.0000000e+00	0.0000000e+00	0.0000000e+00	0.0000000e+00	0.0000000e+00	0.0000000e+00	0.0000000e+00	0.0000000e+00	0.0000000e+00	0.0000000e+00	0.0000000e+00	0.0000000e+00	0.0000000e+00	0.0000000e+00	0.0000000e+00
12	0.0000000e+00	0.0000000e+00	0.0000000e+00	0.0000000e+00	0.0000000e+00	0.0000000e+00	0.0000000e+00	0.0000000e+00	0.0000000e+00	0.0000000e+00	0.0000000e+00	0.0000000e+00	0.0000000e+00	0.0000000e+00	0.0000000e+00	0.0000000e+00	0.0000000e+00	0.0000000e+00	0.0000000e+00	0.0000000e+00
13	0.0000000e+00	0.0000000e+00	0.0000000e+00	0.0000000e+00	0.0000000e+00	0.0000000e+00	0.0000000e+00	0.0000000e+00	0.0000000e+00	0.0000000e+00	0.0000000e+00	0.0000000e+00	0.0000000e+00	0.0000000e+00	0.0000000e+00	0.0000000e+00	0.0000000e+00	0.0000000e+00	0.0000000e+00	0.0000000e+00
14	0.0000000e+00	0.0000000e+00	0.0000000e+00	0.0000000e+00	0.0000000e+00	0.0000000e+00	0.0000000e+00	0.0000000e+00	0.0000000e+00	0.0000000e+00	0.0000000e+00	0.0000000e+00	0.0000000e+00	0.0000000e+00	0.0000000e+00	0.0000000e+00	0.0000000e+00	0.0000000e+00	0.0000000e+00	0.0000000e+00
15	0.0000000e+00	0.0000000e+00	0.0000000e+00	0.0000000e+00	0.0000000e+00	0.0000000e+00	0.0000000e+00	0.0000000e+00	0.0000000e+00	0.0000000e+00	0.0000000e+00	0.0000000e+00	0.0000000e+00	0.0000000e+00	0.0000000e+00	0.0000000e+00	0.0000000e+00	0.0000000e+00	0.0000000e+00	0.0000000e+00
16	0.0000000e+00	0.0000000e+00	0.0000000e+00	0.0000000e+00	0.0000000e+00	0.0000000e+00	0.0000000e+00	0.0000000e+00	0.0000000e+00	0.0000000e+00	0.0000000e+00	0.0000000e+00	0.0000000e+00	0.0000000e+00	0.0000000e+00	0.0000000e+00	0.0000000e+00	0.0000000e+00	0.0000000e+00	0.0000000e+00
17	0.0000000e+00	0.0000000e+00	0.0000000e+00	0.0000000e+00	0.0000000e+00	0.0000000e+00	0.0000000e+00	0.0000000e+00	0.0000000e+00	0.0000000e+00	0.0000000e+00	0.0000000e+00	0.0000000e+00	0.0000000e+00	0.0000000e+00	0.0000000e+00	0.0000000e+00	0.0000000e+00	0.0000000e+00	0.0000000e+00
18	0.0000000e+00	0.0000000e+00	0.0000000e+00	0.0000000e+00	0.0000000e+00	0.0000000e+00	0.0000000e+00	0.0000000e+00	0.0000000e+00	0.0000000e+00	0.0000000e+00	0.0000000e+00	0.0000000e+00	0.0000000e+00	0.0000000e+00	0.0000000e+00	0.0000000e+00	0.0000000e+00	0.0000000e+00	0.0000000e+00
19	0.0000000e+00	0.0000000e+00	0.0000000e+00	0.0000000e+00	0.0000000e+00	0.0000000e+00	0.0000000e+00	0.0000000e+00	0.0000000e+00	0.0000000e+00	0.0000000e+00	0.0000000e+00	0.0000000e+00	0.0000000e+00	0.0000000e+00	0.0000000e+00	0.0000000e+00	0.0000000e+00	0.0000000e+00	0.0000000e+00
20	0.0000000e+00	0.0000000e+00	0.0000000e+00	0.0000000e+00	0.0000000e+00	0.0000000e+00	0.0000000e+00	0.0000000e+00	0.0000000e+00	0.0000000e+00	0.0000000e+00	0.0000000e+00	0.0000000e+00	0.0000000e+00	0.0000000e+00	0.0000000e+00	0.0000000e+00	0.0000000e+00	0.0000000e+00	0.0000000e+00
21	0.0000000e+00	0.0000000e+00	0.0000000e+00	0.0000000e+00	0.0000000e+00	0.0000000e+00	0.0000000e+00	0.0000000e+00	0.0000000e+00	0.0000000e+00	0.0000000e+00	0.0000000e+00	0.0000000e+00	0.0000000e+00	0.0000000e+00	0.0000000e+00	0.0000000e+00	0.0000000e+00	0.0000000e+00	0.0000000e+00
22	0.0000000e+00	0.0000000e+00	0.0000000e+00	0.0000000e+00	0.0000000e+00	0.0000000e+00	0.0000000e+00	0.0000000e+00	0.0000000e+00	0.0000000e+00	0.0000000e+00	0.0000000e+00	0.0000000e+00	0.0000000e+00	0.0000000e+00	0.0000000e+00	0.0000000e+00	0.0000000e+00	0.0000000e+00	0.0000000e+00
23	0.0000000e+00	0.0000000e+00	0.0000000e+00	0.0000000e+00	0.0000000e+00	0.0000000e+00	0.0000000e+00	0.0000000e+00	0.0000000e+00	0.0000000e+00	0.0000000e+00	0.0000000e+00	0.0000000e+00	0.0000000e+00	0.0000000e+00	0.0000000e+00	0.0000000e+00	0.0000000e+00	0.0000000e+00	0.0000000e+00
24	0.0000000e+00	0.0000000e+00	0.0000000e+00	0.0000000e+00	0.0000000e+00	0.0000000e+00	0.0000000e+00	0.0000000e+00	0.0000000e+00	0.0000000e+00	0.0000000e+00	0.0000000e+00	0.0000000e+00	0.0000000e+00	0.0000000e+00	0.0000000e+00	0.0000000e+00	0.0000000e+00	0.0000000e+00	0.0000000e+00
25	0.0000000e+00	0.0000000e+00	0.0000000e+00	0.0000000e+00	0.0000000e+00	0.0000000e+00	0.0000000e+00	0.0000000e+00	0.0000000e+00	0.0000000e+00	0.0000000e+00	0.0000000e+00	0.0000000e+00	0.0000000e+00	0.0000000e+00	0.0000000e+00	0.0000000e+00	0.0000000e+00	0.0000000e+00	0.0000000e+00
26	0.0000000e+00	0.0000000e+00	0.0000000e+00	0.0000000e+00	0.0000000e+00	0.0000000e+00	0.0000000e+00	0.0000000e+00	0.0000000e+00	0.0000000e+00	0.0000000e+00	0.0000000e+00	0.0000000e+00	0.0000000e+00	0.0000000e+00	0.0000000e+00	0.0000000e+00	0.0000000e+00	0.0000000e+00	0.0000000e+00
27	0.0000000e+00	0.0000000e+00	0.0000000e+00	0.0000000e+00	0.0000000e+00	0.0000000e+00	0.0000000e+00	0.0000000e+00	0.0000000e+00	0.0000000e+00	0.0000000e+00	0.0000000e+00	0.0000000e+00	0.0000000e+00	0.0000000e+00	0.0000000e+00	0.0000000e+00	0.0000000e+00	0.0000000e+00	0.0000000e+00
28	0.0000000e+00	0.0000000e+00	0.0000000e+00	0.0000000e+00	0.0000000e+00	0.0000000e+00	0.0000000e+00	0.0000000e+00	0.0000000e+00	0.0000000e+00	0.0000000e+00	0.0000000e+00	0.0000000e+00	0.0000000e+00	0.0000000e+00	0.0000000e+00	0.0000000e+00	0.0000000e+00	0.0000000e+00	0.0000000e+00
29	0.0000000e+00	0.0000000e+00	0.0000000e+00	0.0000000e+00	0.0000000e+00	0.0000000e+00	0.0000000e+00	0.0000000e+00	0.0000000e+00	0.0000000e+00	0.0000000e+00	0.0000000e+00	0.0000000e+00	0.0000000e+00	0.0000000e+00	0.0000000e+00	0.0000000e+00	0.0000000e+00	0.0000000e+00	0.0000000e+00
30	0.0000000e+00	0.0000000e+00	0.0000000e+00	0.0000000e+00	0.0000000e+00	0.0000000e+00	0.0000000e+00	0.0000000e+00	0.0000000e+00	0.0000000e+00	0.0000000e+00	0.0000000e+00	0.0000000e+00	0.0000000e+00	0.0000000e+00	0.0000000e+00	0.0000000e+00	0.0000000e+00	0.0000000e+00	0.0000000e+00
31	0.0000000e+00	0.0000000e+00	0.0000000e+00	0.0000000e+00	0.0000000e+00	0.0000000e+00	0.0000000e+00	0.0000000e+00	0.0000000e+00	0.0000000e+00	0.0000000e+00	0.0000000e+00	0.0000000e+00	0.0000000e+00	0.0000000e+00	0.0000000e+00	0.0000000e+00	0.0000000e+00	0.0000000e+00	0.0000000e+00
32	0.0000000e+00	0.0000000e+00	0.0000000e+00	0.0000000e+00	0.0000000e+00	0.0000000e+00	0.0000000e+00	0.0000000e+00	0.0000000e+00	0.0000000e+00	0.0000000e+00	0.0000000e+00	0.0000000e+00	0.0000000e+00	0.0000000e+00	0.0000000e+00	0.0000000e+00	0.0000000e+00	0.0000000e+00	0.0000000e+00
33	0.0000000e+00	0.0000000e+00	0.0000000e+00	0.0000000e+00	0.0000000e+00	0.0000000e+00	0.0000000e+00	0.0000000e+00	0.0000000e+00	0.0000000e+00	0.0000000e+00	0.0000000e+00	0.0000000e+00	0.0000000e+00	0.0000000e+00	0.0000000e+00	0.0000000e+00	0.0000000e+00	0.0000000e+00	0.0000000e+00
34	0.0000000e+00	0.0000000e+00	0.0000000e+00	0.0000000e+00	0.0000000e+00	0.0000000e+00	0.0000000e+00	0.0000000e+00	0.0000000e+00	0.0000000e+00	0.0000000e+00	0.0000000e+00	0.0000000e+00	0.0000000e+00	0.0000000e+00	0.0000000e+00	0.0000000e+00	0.0000000e+00	0.0000000e+00	0.0000000e+00
35	0.0000000e+00	0.0000000e+00	0.0000000e+00	0.0000000e+00	0.0000000e+00	0.0000000e+00	0.0000000e+00	0.0000000e+00	0.0000000e+00	0.0000000e+00	0.0000000e+00	0.0000000e+00	0.0000000e+00	0.0000000e+00	0.0000000e+00	0.0000000e+00	0.0000000e+00	0.0000000e+00	0.0000000e+00	0.0000000e+00
36	0.0000000e+00	0.0000000e+00	0.0000000e+00	0.0000000e+00	0.0000000e+00	0.0000000e+00	0.0000000e+00	0.0000000e+00	0.0000000e+00	0.0000000e+00	0.0000000e+00	0.0000000e+00	0.0000000e+00	0.0000000e+00	0.0000000e+00	0.0000000e+00	0.0000000e+00	0.0000000e+00	0.0000000e+00	0.0000000e+00
37	0.0000000e+00	0.0000000e+00	0.0000000e+00	0.0000000e+00	0.0000000e+00	0.0000000e+00	0.0000000e+00	0.0000000e+00	0.0000000e+00	0.0000000e+00	0.0000000e+00	0.0000000e+00	0.0000000e+00	0.0000000e+00	0.0000000e+00	0.0000000e+00	0.0000000e+00	0.0000000e+00	0.0000000e+00	0.0000000e+00
38	0.0000000e+00	0.0000000e+00	0.0000000e+00	0.0000000e+00	0.0000000e+00	0.0000000e+00	0.0000000e+00	0.0000000e+00	0.0000000e+00	0.0000000e+00	0.0000000e+00	0.0000000e+00	0.0000000e+00	0.0000000e+00	0.0000000e+00	0.0000000e+00	0.0000000e+00	0.0000000e+00	0.0000000e+00	0.0000000e+00
39	1.6092047e-04	1.6199434e-04	1.6287598e-04	1.6364079e-04	4.0325347e-05	4.0594451e-05	4.0815382e-05	4.1007036e-05	1.0082593e-05	1.0149877e-05	1.0205117e-05	1.0253036e-05	2.5206531e-06	2.5374743e-06	2.5512842e-06	2.5632641e-06	6.3016244e-07	6.3436772e-07	6.3782020e-07	6.4081517e-07
40	5.0254381e-04	5.0601197e-04	5.0883511e-04	5.1126658e-04	1.2616218e-04	1.2703288e-04	1.2774163e-04	1.2835205e-04	3.1547502e-05	3.1765225e-05	3.1942453e-05	3.2095092e-05	7.8869028e-06	7.9413335e-06	7.9856408e-06	8.0238007e-06	1.9717210e-06	1.9853287e-06	1.9964055e-06	2.0059454e-06
41	1.0465418e-03	1.0540227e-03	1.0600549e-03	1.0652177e-03	2.6325964e-04	2.6514162e-04	2.6665912e-04	2.6795789e-04	6.5836437e-05	6.6307087e-05	6.6686587e-05	6.7011388e-05	1.6459193e-05	1.6576857e-05	1.6671732e-05	1.6752933e-05	4.1147839e-06	4.1441996e-06	4.1679184e-06	4.1882184e-06
42	1.8179008e-03	1.8313887e-03	1.8421547e-03	1.8513128e-03	4.5831826e-04	4.6171927e-04	4.6443382e-04	4.6674293e-04	1.1463064e-04	1.1548128e-04	1.1616022e-04	1.1673776e-04	2.8657860e-05	2.8870521e-05	2.9040258e-05	2.9184643e-05	7.1644306e-06	7.2175956e-06	7.2600298e-06	7.2961259e-06
43	2.8438635e-03	2.8658133e-03	2.8831638e-03	2.8978001e-03	7.1875668e-04	7.2430573e-04	7.2869174e-04	7.3239147e-04	1.7979303e-04	1.8118112e-04	1.8227826e-04	1.8320374e-04	4.4948664e-05	4.5295688e-05	4.5569978e-05	4.5801348e-05	1.1237096e-05	1.1323852e-05	1.1392424e-05	1.1450266e-05
44	4.1554597e-03	4.1889097e-03	4.2150895e-03	4.2369748e-03	1.0531485e-03	1.0616295e-03	1.0682666e-03	1.0738144e-03	2.6347820e-04	2.6560004e-04	2.6726054e-04	2.6864852e-04	6.5870297e-05	6.6400763e-05	6.6815893e-05	6.7162892e-05	1.6467446e-05	1.6600061e-05	1.6703843e-05	1.6790592e-05
45	5.7870262e-03	5.8357808e-03	5.8735029e-03	5.9047475e-03	1.4711582e-03	1.4835603e-03	1.4931545e-03	1.5011002e-03	3.6811725e-04	3.7122064e-04	3.7362138e-04	3.7560963e-04	9.2030594e-05	9.2806451e-05	9.3406647e-05	9.3903715e-05	2.3007428e-05	2.3201391e-05	2.3351438e-05	2.3475704e-05
46	7.7768225e-03	7.8456875e-03	7.8982354e-03	7.9413365e-03	1.9837753e-03	2.0013583e-03	2.0147720e-03	2.0257722e-03	4.9647752e-04	5.0087821e-04	5.0423536e-04	5.0698846e-04	1.2412147e-04	1.2522166e-04	1.2606096e-04	1.2674925e-04	3.1030008e-05	3.1305053e-05	3.1514876e-05	3.1686945e-05
47	1.0166446e-02	1.0261462e-02	1.0332823e-02	1.0390750e-02	2.6032507e-03	2.6276128e-03	2.6459035e-03	2.6607470e-03	6.5164806e-04	6.5774685e-04	6.6232562e-04	6.6604141e-04	1.6291528e-04	1.6444001e-04	1.6558473e-04	1.6651370e-04	4.0728259e-05	4.1109436e-05	4.1395611e-05	4.1627849e-05
48	1.3004039e-02	1.3132814e-02	1.3227857e-02	1.3304212e-02	3.3440767e-03	3.3772526e-03	3.4017262e-03	3.4213807e-03	8.3728741e-04	8.4559480e-04	8.5172290e-04	8.5664426e-04	2.0932681e-04	2.1140371e-04	2.1293578e-04	2.1416615e-04	5.2330851e-05	5.2850067e-05	5.3233076e-05	5.3540664e-05
49	1.6339245e-02	1.6511367e-02	1.6636033e-02	1.6735131e-02	4.2217767e-03	4.2663599e-03	4.2986291e-03	4.3242690e-03	1.0573221e-03	1.0684892e-03	1.0765717e-03	1.0829935e-03	2.6433788e-04	2.6712975e-04	2.6915042e-04	2.7075593e-04	6.6083207e-05	6.6781159e-05	6.7286317e-05	6.7687686e-05
50	2.0229914e-02	2.0457415e-02	2.0619097e-02	2.0746111e-02	5.2549272e-03	5.3142160e-03	5.3563145e-03	5.3893673e-03	1.3164578e-03	1.3313135e-03	1.3418613e-03	1.3501424e-03	3.2912514e-04	3.3283917e-04	3.3547622e-04	3.3754657e-04	8.2279449e-05	8.3207935e-05	8.3867181e-05	8.4384759e-05
51	2.4734965e-02	2.5032821e-02	2.5240745e-02	2.5401850e-02	6.4634140e-03	6.5415756e-03	6.5960787e-03	6.6382764e-03	1.6197449e-03	1.6393369e-03	1.6529978e-03	1.6635740e-03	4.0495147e-04	4.0984967e-04	4.1326504e-04	4.1590920e-04	1.0123525e-04	1.0245976e-04	1.0331358e-04	1.0397460e-04
52	2.9921688e-02	3.0308630e-02	3.0574290e-02	3.0776930e-02	7.8707917e-03	7.9731263e-03	8.0432955e-03	8.0967635e-03	1.9731773e-03	1.9988399e-03	2.0164350e-03	2.0298415e-03	4.9331581e-04	4.9973176e-04	5.0413075e-04	5.0748253e-04	1.2332526e-04	1.2492919e-04	1.2602891e-04	1.2686682e-04
53	3.5860468e-02	3.6359585e-02	3.6697234e-02	3.6950375e-02	9.5031559e-03	9.6363234e-03	9.7262801e-03	9.7936290e-03	2.3834159e-03	2.4168272e-03	2.4393953e-03	2.4562903e-03	5.9588389e-04	6.0423719e-04	6.0987951e-04	6.1410348e-04	1.4896583e-04	1.5105407e-04	1.5246460e-04	1.5352056e-04
54	4.2625392e-02	4.3264832e-02	4.3692227e-02	4.4006700e-02	1.1389749e-02	1.1562049e-02	1.1677034e-02	1.1761487e-02	2.8579491e-03	2.9012035e-03	2.9300669e-03	2.9512641e-03	7.1452852e-04	7.2534283e-04	7.3255913e-04	7.3785876e-04	1.7862504e-04	1.8132850e-04	1.8313249e-04	1.8445734e-04
55	5.0294931e-02	5.1108760e-02	5.1647804e-02	5.2036903e-02	1.3563720e-02	1.3785452e-02	1.3932084e-02	1.4037691e-02	3.4052970e-03	3.4609970e-03	3.4978283e-03	3.5243513e-03	8.5138066e-04	8.6530671e-04	8.7451522e-04	8.8114645e-04	2.1283547e-04	2.1631680e-04	2.1861881e-04	2.2027654e-04
56	5.8951093e-02	5.9980141e-02	6.0657728e-02	6.1137888e-02	1.6062561e-02	1.6346422e-02	1.6533049e-02	1.6664942e-02	4.0351360e-03	4.1064957e-03	4.1534077e-03	4.1865564e-03	1.0088606e-03	1.0267021e-03	1.0384311e-03	1.0467190e-03	2.5220199e-04	2.5666209e-04	2.5959416e-04	2.6166602e-04
57	6.8675691e-02	6.9968291e-02	7.0817433e-02	7.1408776e-02	1.8927681e-02	1.9289192e-02	1.9526363e-02	1.9691014e-02	4.7582092e-03	4.8491654e-03	4.9088334e-03	4.9502491e-03	1.1896557e-03	1.2123970e-03	1.2273155e-03	1.2376704e-03	2.9739616e-04	3.0308109e-04	3.0681046e-04	3.0939902e-04
58	7.9550751e-02	8.1164089e-02	8.2224704e-02	8.2951761e-02	2.2205442e-02	2.2663623e-02	2.2964532e-02	2.3170088e-02	5.5866138e-03	5.7020020e-03	5.7777789e-03	5.8295327e-03	1.3967923e-03	1.4256426e-03	1.4445890e-03	1.4575289e-03	3.4917420e-04	3.5638623e-04	3.6112245e-04	3.6435718e-04
59	9.1658184e-02	9.3659222e-02	9.4979020e-02	9.5871841e-02	2.5948155e-02	2.6526184e-02	2.6907214e-02	2.7164011e-02	6.5340857e-03	6.6798137e-03	6.7758730e-03	6.8405987e-03	1.6337069e-03	1.6701437e-03	1.6941617e-03	1.7103452e-03	4.0839485e-04	4.1750322e-04	4.2350717e-04	4.2755269e-04
60	1.0507789e-01	1.0754368e-01	1.0917918e-01	1.1027413e-01	3.0214710e-02	3.0940497e-02	3.1421899e-02	3.1742958e-02	7.6162003e-03	7.7994036e-03	7.9209201e-03	8.0019442e-03	1.9042969e-03	1.9501047e-03	1.9804884e-03	2.0007474e-03	4.7603180e-04	4.8748255e-04	4.9507769e-04	5.0014193e-04
61	1.1988139e-01	1.2289995e-01	1.2491725e-01	1.2625798e-01	3.5069517e-02	3.5976585e-02	3.6583199e-02	3.6984861e-02	8.8501517e-03	9.0794316e-03	9.2327734e-03	9.3342845e-03	2.2128652e-03	2.2701951e-03	2.3085372e-03	2.3339193e-03	5.5316005e-04	5.6749082e-04	5.7707520e-04	5.8341998e-04
62	1.3613103e-01	1.3980220e-01	1.4227759e-01	1.4391649e-01	4.0583577e-02	4.1712100e-02	4.2474156e-02	4.2977001e-02	1.0255090e-02	1.0540795e-02	1.0733742e-02	1.0861033e-02	2.5642049e-03	2.6356453e-03	2.6838917e-03	2.7157209e-03	6.4097689e-04	6.5883455e-04	6.7089450e-04	6.7885072e-04
63	1.5387671e-01	1.5831344e-01	1.6133478e-01	1.6333364e-01	4.6834625e-02	4.8232822e-02	4.9187193e-02	4.9816837e-02	1.1852235e-02	1.2206841e-02	1.2448925e-02	1.2608614e-02	2.9636286e-03	3.0523002e-03	3.1128351e-03	3.1527663e-03	7.4080920e-04	7.6297366e-04	7.7810498e-04	7.8808625e-04
64	1.7315332e-01	1.7848229e-01	1.8214946e-01	1.8458008e-01	5.3907218e-02	5.5632777e-02	5.6824107e-02	5.7612161e-02	1.3664996e-02	1.4103508e-02	1.4406327e-02	1.4606617e-02	3.4169976e-03	3.5266539e-03	3.6023784e-03	3.6524641e-03	8.5412075e-04	8.8152994e-04	9.0045764e-04	9.1297683e-04
65	1.9397454e-01	2.0033780e-01	2.0476187e-01	2.0770665e-01	6.1890603e-02	6.4012739e-02	6.5494281e-02	6.6479477e-02	1.5718525e-02	1.6259047e-02	1.6636515e-02	1.6887516e-02	3.9306118e-03	4.0657821e-03	4.1601774e-03	4.2229464e-03	9.8248441e-04	1.0162701e-03	1.0398641e-03	1.0555531e-03
66	2.1633875e-01	2.2389473e-01	2.2919842e-01	2.3275077e-01	7.0882845e-02	7.3484545e-02	7.5319771e-02	7.6549258e-02	1.8040943e-02	1.8705321e-02	1.9174135e-02	1.9488228e-02	4.5115165e-03	4.6776669e-03	4.7949104e-03	4.8734607e-03	1.1276590e-03	1.1691870e-03	1.1984910e-03	1.2181239e-03
67	2.4021961e-01	2.4914494e-01	2.5546273e-01	2.5972688e-01	8.0986158e-02	8.4167193e-02	8.6431454e-02	8.7962085e-02	2.0662283e-02	2.1476971e-02	2.2057100e-02	2.2449326e-02	5.1672388e-03	5.3709891e-03	5.5160777e-03	5.6141728e-03	1.2915230e-03	1.3424471e-03	1.3787095e-03	1.4032267e-03
68	2.6556570e-01	2.7605589e-01	2.8353464e-01	2.8862671e-01	9.2305847e-02	9.6185762e-02	9.8968508e-02	1.0086890e-01	2.3614395e-02	2.4611347e-02	2.5326694e-02	2.5815350e-02	5.9057650e-03	6.1551120e-03	6.3340280e-03	6.4562469e-03	1.4760689e-03	1.5383869e-03	1.5831022e-03	1.6136476e-03
69	2.9230280e-01	3.0457534e-01	3.1337414e-01	3.1942172e-01	1.0495080e-01	1.0967364e-01	1.1308069e-01	1.1543297e-01	2.6931308e-02	2.8149371e-02	2.9028479e-02	2.9635673e-02	6.7356319e-03	7.0402992e-03	7.2601869e-03	7.4120630e-03	1.6834258e-03	1.7595666e-03	1.8145195e-03	1.8524751e-03
70	3.2033125e-01	3.3462783e-01	3.4491949e-01	3.5205955e-01	1.1902877e-01	1.2476824e-01	1.2892511e-01	1.3182612e-01	3.0648207e-02	3.2134681e-02	3.3211760e-02	3.3963829e-02	7.6656717e-03	8.0375006e-03	8.3069247e-03	8.4950511e-03	1.9157956e-03	2.0087167e-03	2.0760462e-03	2.1230590e-03
71	3.4952860e-01	3.6611786e-01	3.7808892e-01	3.8646754e-01	1.3464488e-01	1.4161059e-01	1.4666568e-01	1.5022913e-01	3.4801285e-02	3.6613876e-02	3.7929835e-02	3.8858079e-02	8.7049772e-03	9.1584166e-03	9.4876202e-03	9.7198344e-03	2.1754439e-03	2.2887536e-03	2.3710177e-03	2.4290449e-03
72	3.7974734e-01	3.9892749e-01	4.1277988e-01	4.2255176e-01	1.5189439e-01	1.6033903e-01	1.6646803e-01	1.7082678e-01	3.9426024e-02	4.1635129e-02	4.3239012e-02	4.4380483e-02	9.8624721e-03	1.0415152e-02	1.0816418e-02	1.1102000e-02	2.4645924e-03	2.6026930e-03	2.7029587e-03	2.7743173e-03
73	4.1081719e-01	4.3291718e-01	4.4886810e-01	4.6019683e-01	1.7085547e-01	1.8108201e-01	1.8849168e-01	1.9380054e-01	4.4555336e-02	4.7246476e-02	4.9196803e-02	5.0595295e-02	1.1146446e-02	1.1819790e-02	1.2307779e-02	1.2657698e-02	2.7853029e-03	2.9535427e-03	3.0754699e-03	3.1628988e-03
74	4.4255895e-01	4.6793686e-01	4.8622225e-01	4.9927996e-01	1.9159701e-01	2.0396549e-01	2.1290062e-01	2.1933927e-01	5.0222028e-02	5.3498359e-02	5.5865448e-02	5.7572604e-02	1.2565177e-02	1.3385031e-02	1.3977361e-02	1.4404559e-02	3.1396317e-03	3.3444626e-03	3.4924492e-03	3.5991784e-03
75	4.7478118e-01	5.0382076e-01	5.2469746e-01	5.3966644e-01	2.1416363e-01	2.2909655e-01	2.3984648e-01	2.4762367e-01	5.6454588e-02	6.0439174e-02	6.3307485e-02	6.5384328e-02	1.4125871e-02	1.5123079e-02	1.5840920e-02	1.6360691e-02	3.5293660e-03	3.7784855e-03	3.9578145e-03	4.0876609e-03
76	5.0728640e-01	5.4039347e-01	5.6414201e-01	5.8121460e-01	2.3857483e-01	2.5656239e-01	2.6946906e-01	2.7882605e-01	6.3276957e-02	6.8115249e-02	7.1586316e-02	7.4104677e-02	1.5834612e-02	1.7045640e-02	1.7914448e-02	1.8544802e-02	3.9560097e-03	4.2585165e-03	4.4755396e-03	4.6329967e-03
77	5.3986761e-01	5.7746976e-01	6.0439713e-01	6.2377799e-01	2.6481425e-01	2.8642194e-01	3.0188870e-01	3.1310466e-01	7.0705311e-02	7.6568458e-02	8.0764283e-02	8.3808917e-02	1.7695550e-02	1.9163323e-02	2.0213696e-02	2.0975891e-02	4.4205821e-03	4.7871838e-03	5.0495335e-03	5.2399040e-03
78	5.7231124e-01	6.1485888e-01	6.4529995e-01	6.6720616e-01	2.9282317e-01	3.1870037e-01	3.3720053e-01	3.5059666e-01	7.8745701e-02	8.5834474e-02	9.0901087e-02	9.4571569e-02	1.9710315e-02	2.1485206e-02	2.2753782e-02	2.3672802e-02	4.9234706e-03	5.3667294e-03	5.6835427e-03	5.9130571e-03
79	6.0440459e-01	6.5237204e-01	6.8668704e-01	7.1135218e-01	3.2250335e-01	3.5339283e-01	3.7547563e-01	3.9142324e-01	8.7394425e-02	9.5943763e-02	1.0205435e-01	1.0646832e-01	2.1878104e-02	2.4019084e-02	2.5549330e-02	2.6654706e-02	5.4644532e-03	5.9990713e-03	6.3811856e-03	6.6572060e-03
80	6.3593655e-01	6.8982173e-01	7.2839243e-01	7.5606927e-01	3.5370486e-01	3.9045004e-01	4.1674395e-01	4.3567169e-01	9.6633165e-02	1.0691637e-01	1.1427386e-01	1.1957026e-01	2.4194463e-02	2.6770163e-02	2.8613036e-02	2.9939653e-02	6.0423949e-03	6.6854773e-03	7.1455935e-03	7.4768146e-03
81	6.6670080e-01	7.2702440e-01	7.7025040e-01	8.0121410e-01	3.8622708e-01	4.2977861e-01	4.6099383e-01	4.8339626e-01	1.0642813e-01	1.1876126e-01	1.2760094e-01	1.3394383e-01	2.6651063e-02	2.9740886e-02	3.1955495e-02	3.3544576e-02	6.6551928e-03	7.4265234e-03	7.9793690e-03	8.3760616e-03
82	6.9649374e-01	7.6379676e-01	8.1209607e-01	8.4664752e-01	4.1982048e-01	4.7124174e-01	5.0817744e-01	5.3462528e-01	1.1672970e-01	1.3147611e-01	1.4207000e-01	1.4965343e-01	2.9235605e-02	3.2930895e-02	3.5585614e-02	3.7485933e-02	7.2997538e-03	8.2220820e-03	8.8846871e-03	9.3589995e-03
83	7.2511651e-01	7.9995337e-01	8.5376417e-01	8.9223144e-01	4.5417665e-01	5.1464085e-01	5.5819203e-01	5.8934006e-01	1.2746687e-01	1.4503943e-01	1.5770083e-01	1.6675319e-01	3.1930430e-02	3.6335028e-02	3.9508652e-02	4.1777644e-02	7.9716477e-03	9.0708261e-03	9.8628084e-03	1.0429041e-02
84	7.5238511e-01	8.3531112e-01	8.9509300e-01	9.3782823e-01	4.8893901e-01	5.5971534e-01	6.1087854e-01	6.4746742e-01	1.3854827e-01	1.5940809e-01	1.7449602e-01	1.8528279e-01	3.4712740e-02	3.9942701e-02	4.3725576e-02	4.6430043e-02	8.6651669e-03	9.9700754e-03	1.0913920e-02	1.1588699e-02
85	7.7813759e-01	8.6969484e-01	9.3592964e-01	9.8330547e-01	5.2372889e-01	6.0616546e-01	6.6604612e-01	7.0890415e-01	1.4986980e-01	1.7452416e-01	1.9244897e-01	2.0527588e-01	3.7556527e-02	4.3739616e-02	4.8235072e-02	5.1451990e-02	9.3738061e-03	1.0916223e-02	1.2037635e-02	1.2840111e-02
86	8.0223216e-01	9.0293566e-01	9.7612719e-01	1.0000000e+00	5.5814535e-01	6.5364635e-01	7.2346395e-01	7.7350685e-01	1.6131269e-01	1.9031075e-01	2.1153943e-01	2.2675519e-01	4.0432074e-02	4.7706717e-02	5.3032419e-02	5.6849644e-02	1.0090141e-02	1.1904478e-02	1.3232714e-02	1.4184734e-02
87	8.2454625e-01	9.3486406e-01	1.0000000e+00	1.0000000e+00	5.9176460e-01	7.0175089e-01	7.8283766e-01	8.4107208e-01	1.7274090e-01	2.0666295e-01	2.3172236e-01	2.4972267e-01	4.3305275e-02	5.1817873e-02	5.8106672e-02	6.2623968e-02	1.0805661e-02	1.2928288e-02	1.4496366e-02	1.5622727e-02
88	8.4497892e-01	9.6531624e-01	1.0000000e+00	1.0000000e+00	6.2416095e-01	7.5003332e-01	8.4382859e-01	9.1136008e-01	1.8400780e-01	2.2345477e-01	2.5293398e-01	2.7416765e-01	4.6139322e-02	5.6041641e-02	6.3442185e-02	6.8772793e-02	1.1511190e-02	1.3979785e-02	1.5824629e-02	1.7153462e-02
89	8.6345334e-01	9.9414169e-01	1.0000000e+00	1.0000000e+00	6.5490844e-01	7.9800831e-01	9.0603519e-01	9.8407190e-01	1.9495391e-01	2.4053387e-01	2.7507954e-01	3.0005308e-01	4.8894100e-02	6.0339893e-02	6.9015498e-02	7.5287308e-02	1.2196741e-02	1.5049444e-02	1.7211598e-02	1.8774657e-02
90	8.7992365e-01	1.0000000e+00	1.0000000e+00	1.0000000e+00	6.8361447e-01	8.4518435e-01	9.6902284e-01	1.0000000e+00	2.0541978e-01	2.5773368e-01	2.9804406e-01	3.2732744e-01	5.1529440e-02	6.4670862e-02	7.4798042e-02	8.2155082e-02	1.2852325e-02	1.6126843e-02	1.8650100e-02	2.0483128e-02
91	8.9437996e-01	1.0000000e+00	1.0000000e+00	1.0000000e+00	7.0993900e-01	8.9106664e-01	1.0000000e+00	1.0000000e+00	2.1525309e-01	2.7487263e-01	3.2168893e-01	3.5592077e-01	5.4006897e-02	6.8988942e-02	8.0755257e-02	8.9359041e-02	1.3468393e-02	1.7200618e-02	2.0131479e-02	2.2274534e-02
92	9.0685287e-01	1.0000000e+00	1.0000000e+00	1.0000000e+00	7.3361780e-01	9.3516731e-01	1.0000000e+00	1.0000000e+00	2.2431897e-01	2.9175742e-01	3.4584874e-01	3.8574036e-01	5.6292346e-02	7.3245485e-02	8.6845787e-02	9.6876365e-02	1.4036485e-02	1.8258663e-02	2.1645396e-02	2.4143108e-02
93	9.1741486e-01	1.0000000e+00	1.0000000e+00	1.0000000e+00	7.5447871e-01	9.7701384e-01	1.0000000e+00	1.0000000e+00	2.3250843e-01	3.0818528e-01	3.7033228e-01	4.1666825e-01	5.8358118e-02	7.7389377e-02	9.3021705e-02	1.0467785e-01	1.4549755e-02	1.9288271e-02	2.3179890e-02	2.6081499e-02
94	9.2617785e-01	1.0000000e+00	1.0000000e+00	1.0000000e+00	7.7244839e-01	1.0000000e+00	1.0000000e+00	1.0000000e+00	2.3974353e-01	3.2394647e-01	3.9492431e-01	4.4855542e-01	6.0184315e-02	8.1367625e-02	9.9228924e-02	1.1272642e-01	1.5003301e-02	2.0276291e-02	2.4721488e-02	2.8080405e-02
95	9.3329023e-01	1.0000000e+00	1.0000000e+00	1.0000000e+00	7.8756208e-01	1.0000000e+00	1.0000000e+00	1.0000000e+00	2.4598611e-01	3.3883785e-01	4.1939708e-01	4.8123052e-01	6.1761027e-02	8.5128795e-02	1.0541010e-01	1.2097930e-01	1.5394709e-02	2.1209976e-02	2.6255922e-02	3.0129123e-02
96	9.3892744e-01	1.0000000e+00	1.0000000e+00	1.0000000e+00	7.9995228e-01	1.0000000e+00	1.0000000e+00	1.0000000e+00	2.5123700e-01	3.5267097e-01	4.4350751e-01	5.1449323e-01	6.3088165e-02	8.8625054e-02	1.1150390e-01	1.2938629e-01	1.5724008e-02	2.2077491e-02	2.7767956e-02	3.2215123e-02
97	9.4328857e-01	1.0000000e+00	1.0000000e+00	1.0000000e+00	8.0984910e-01	1.0000000e+00	1.0000000e+00	1.0000000e+00	2.5554087e-01	3.6528524e-01	4.6700100e-01	5.4810919e-01	6.4176710e-02	9.1815485e-02	1.1744593e-01	1.3788852e-01	1.5993974e-02	2.2868739e-02	2.9241621e-02	3.4323735e-02
98	9.4672728e-01	1.0000000e+00	1.0000000e+00	1.0000000e+00	8.1755320e-01	1.0000000e+00	1.0000000e+00	1.0000000e+00	2.5897958e-01	3.7656347e-01	4.8962486e-01	5.8182704e-01	6.5047068e-02	9.4670071e-02	1.2317217e-01	1.4642271e-01	1.6209721e-02	2.3576342e-02	3.0661055e-02	3.6439213e-02
99	9.4940510e-01	1.0000000e+00	1.0000000e+00	1.0000000e+00	8.2339809e-01	1.0000000e+00	1.0000000e+00	1.0000000e+00	2.6165740e-01	3.8643038e-01	5.1111927e-01	6.1536455e-01	6.5725348e-02	9.7169313e-02	1.2861660e-01	1.5491760e-01	1.6377768e-02	2.4195541e-02	3.2009940e-02	3.8543864e-02
100	9.5144032e-01	1.0000000e+00	1.0000000e+00	1.0000000e+00	8.2772556e-01	1.0000000e+00	1.0000000e+00	1.0000000e+00	2.6369262e-01	3.9486535e-01	5.3124050e-01	6.4843216e-01	6.6241256e-02	9.9307497e-02	1.3371714e-01	1.6329992e-01	1.6505519e-02	2.4725005e-02	3.3272951e-02	4.0619520e-02
101	9.5295136e-01	1.0000000e+00	1.0000000e+00	1.0000000e+00	8.3085513e-01	1.0000000e+00	1.0000000e+00	1.0000000e+00	2.6520366e-01	4.0189979e-01	5.4977225e-01	6.8073204e-01	6.6624593e-02	1.0109207e-01	1.3841848e-01	1.7149413e-01	1.6600390e-02	2.5166666e-02	3.4436476e-02	4.2647485e-02
102	9.5404550e-01	1.0000000e+00	1.0000000e+00	1.0000000e+00	8.3306285e-01	1.0000000e+00	1.0000000e+00	1.0000000e+00	2.6629779e-01	4.0761730e-01	5.6652977e-01	7.1194215e-01	6.6902392e-02	1.0254373e-01	1.4267317e-01	1.7941829e-01	1.6669103e-02	2.5525733e-02	3.5488869e-02	4.4607518e-02
103	9.5481666e-01	1.0000000e+00	1.0000000e+00	1.0000000e+00	8.3457855e-01	1.0000000e+00	1.0000000e+00	1.0000000e+00	2.6706895e-01	4.1214937e-01	5.8139400e-01	7.4175947e-01	6.7098351e-02	1.0369538e-01	1.4645032e-01	1.8699517e-01	1.6717545e-02	2.5810426e-02	3.6422604e-02	4.6480568e-02
104	9.5534443e-01	1.0000000e+00	1.0000000e+00	1.0000000e+00	8.3558907e-01	1.0000000e+00	1.0000000e+00	1.0000000e+00	2.6759673e-01	4.1565227e-01	5.9430105e-01	7.6987662e-01	6.7232578e-02	1.0458626e-01	1.4973295e-01	1.9414615e-01	1.6750708e-02	2.6030528e-02	3.7233607e-02	4.8247285e-02
105	9.5569451e-01	1.0000000e+00	1.0000000e+00	1.0000000e+00	8.3624200e-01	1.0000000e+00	1.0000000e+00	1.0000000e+00	2.6794681e-01	4.1829602e-01	6.0525811e-01	7.9601415e-01	6.7321693e-02	1.0525924e-01	1.5252210e-01	2.0079953e-01	1.6772711e-02	2.6196691e-02	3.7922272e-02	4.9890063e-02
106	9.5591881e-01	1.0000000e+00	1.0000000e+00	1.0000000e+00	8.3664951e-01	1.0000000e+00	1.0000000e+00	1.0000000e+00	2.6817110e-01	4.2024557e-01	6.1433398e-01	8.1992393e-01	6.7378839e-02	1.0575595e-01	1.5483448e-01	2.0689135e-01	1.6786812e-02	2.6319257e-02	3.8492862e-02	5.1393243e-02
107	9.5605689e-01	1.0000000e+00	1.0000000e+00	1.0000000e+00	8.3689391e-01	1.0000000e+00	1.0000000e+00	1.0000000e+00	2.6830919e-01	4.2164903e-01	6.2166788e-01	8.4141895e-01	6.7414055e-02	1.0611386e-01	1.5670478e-01	2.1237303e-01	1.6795496e-02	2.6407517e-02	3.8954068e-02	5.2744999e-02
108	9.5613884e-01	1.0000000e+00	1.0000000e+00	1.0000000e+00	8.3703520e-01	1.0000000e+00	1.0000000e+00	1.0000000e+00	2.6839114e-01	4.2263239e-01	6.2744702e-01	8.6037329e-01	6.7434973e-02	1.0636488e-01	1.5817999e-01	2.1721141e-01	1.6800651e-02	2.6469375e-02	3.9317607e-02	5.3937330e-02
109	9.5618488e-01	1.0000000e+00	1.0000000e+00	1.0000000e+00	8.3711254e-01	1.0000000e+00	1.0000000e+00	1.0000000e+00	2.6843718e-01	4.2330176e-01	6.3188973e-01	8.7674323e-01	6.7446738e-02	1.0653591e-01	1.5931517e-01	2.2139417e-01	1.6803548e-02	2.6511495e-02	3.9597162e-02	5.4967399e-02
110	9.5620955e-01	1.0000000e+00	1.0000000e+00	1.0000000e+00	8.3715291e-01	1.0000000e+00	1.0000000e+00	1.0000000e+00	2.6846185e-01	4.2374336e-01	6.3522462e-01	8.9056470e-01	6.7453047e-02	1.0664886e-01	1.6016813e-01	2.2492929e-01	1.6805101e-02	2.6539291e-02	3.9807073e-02	5.5837375e-02
111	9.5622212e-01	1.0000000e+00	1.0000000e+00	1.0000000e+00	8.3717296e-01	1.0000000e+00	1.0000000e+00	1.0000000e+00	2.6847442e-01	4.2402494e-01	6.3767207e-01	9.0195851e-01	6.7456265e-02	1.0672096e-01	1.6079477e-01	2.2784650e-01	1.6805892e-02	2.6557020e-02	3.9961174e-02	5.6554772e-02
112	9.5622802e-01	1.0000000e+00	1.0000000e+00	1.0000000e+00	8.3718213e-01	1.0000000e+00	1.0000000e+00	1.0000000e+00	2.6848032e-01	4.2419744e-01	6.3942524e-01	9.1111984e-01	6.7457778e-02	1.0676517e-01	1.6124411e-01	2.3019459e-01	1.6806264e-02	2.6567885e-02	4.0071596e-02	5.7131790e-02
113	9.5623076e-01	1.0000000e+00	1.0000000e+00	1.0000000e+00	8.3718627e-01	1.0000000e+00	1.0000000e+00	1.0000000e+00	2.6848306e-01	4.2429936e-01	6.4064827e-01	9.1830753e-01	6.7458480e-02	1.0679132e-01	1.6155792e-01	2.3203882e-01	1.6806436e-02	2.6574306e-02	4.0148653e-02	5.7584650e-02
114	9.5623147e-01	1.0000000e+00	1.0000000e+00	1.0000000e+00	8.3718732e-01	1.0000000e+00	1.0000000e+00	1.0000000e+00	2.6848377e-01	4.2435637e-01	6.4147716e-01	9.2380901e-01	6.7458663e-02	1.0680596e-01	1.6177083e-01	2.3345196e-01	1.6806481e-02	2.6577900e-02	4.0200895e-02	5.7931389e-02
115	9.5623147e-01	1.0000000e+00	1.0000000e+00	1.0000000e+00	8.3718732e-01	1.0000000e+00	1.0000000e+00	1.0000000e+00	2.6848377e-01	4.2438681e-01	6.4202202e-01	9.2792366e-01	6.7458663e-02	1.0681379e-01	1.6191095e-01	2.3451007e-01	1.6806481e-02	2.6579818e-02	4.0235247e-02	5.8190812e-02
116	9.5623147e-01	1.0000000e+00	1.0000000e+00	1.0000000e+00	8.3718732e-01	1.0000000e+00	1.0000000e+00	1.0000000e+00	2.6848377e-01	4.2440226e-01	6.4236806e-01	9.3093147e-01	6.7458663e-02	1.0681777e-01	1.6200004e-01	2.3528445e-01	1.6806481e-02	2.6580793e-02	4.0257073e-02	5.8380516e-02
117	9.5623147e-01	1.0000000e+00	1.0000000e+00	1.0000000e+00	8.3718732e-01	1.0000000e+00	1.0000000e+00	1.0000000e+00	2.6848377e-01	4.2440949e-01	6.4257939e-01	9.3307932e-01	6.7458663e-02	1.0681963e-01	1.6205451e-01	2.3583810e-01	1.6806481e-02	2.6581249e-02	4.0270406e-02	5.8516033e-02
118	9.5623147e-01	1.0000000e+00	1.0000000e+00	1.0000000e+00	8.3718732e-01	1.0000000e+00	1.0000000e+00	1.0000000e+00	2.6848377e-01	4.2441283e-01	6.4270383e-01	9.3457249e-01	6.7458663e-02	1.0682049e-01	1.6208663e-01	2.3622346e-01	1.6806481e-02	2.6581460e-02	4.0278260e-02	5.8610279e-02
119	9.5623147e-01	1.0000000e+00	1.0000000e+00	1.0000000e+00	8.3718732e-01	1.0000000e+00	1.0000000e+00	1.0000000e+00	2.6848377e-01	4.2441370e-01	6.4277324e-01	9.3558161e-01	6.7458663e-02	1.0682072e-01	1.6210456e-01	2.3648423e-01	1.6806481e-02	2.6581515e-02	4.0282643e-02	5.8673997e-02
120	9.5623147e-01	1.0000000e+00	1.0000000e+00	1.0000000e+00	8.3718732e-01	1.0000000e+00	1.0000000e+00	1.0000000e+00	2.6848377e-01	4.2441370e-01	6.4281018e-01	9.3624286e-01	6.7458663e-02	1.0682072e-01	1.6211412e-01	2.3665532e-01	1.6806481e-02	2.6581515e-02	4.0284976e-02	5.8715766e-02
