# Supplementary material for: Quantifying the Potential for Future Gene Therapy to Lower Lifetime Risk of Polygenic Late-Onset Diseases
Source: MDPI journal article supplement (doi:10.3390/ijms20133352), 2019-07-08
Supplement: s2 [file s2 › SuppFiles/Results/LODsCommonLow/T2D/-1.000/FrailtyAnalysis.csv]

Age	Heritability	MeanOR	CaseOR	nControls	nCases	nCumIncidence	nIncidence	nLifeIncidence0	nAbsIncidence0	nLifeIncidence5	nAbsIncidence5	nLifeIncidence10	nAbsIncidence10	nLifeIncidence15	nAbsIncidence15	nIncActDivExp
19	0.443556	0.329725	0.854536	999999742	258	2.58e-07	2.58e-07	2.55643e-07	2.55643e-07	2.56028e-07	2.56028e-07	2.56154e-07	2.56154e-07	2.56338e-07	2.56338e-07	0.0141476
20	0.443556	0.329725	0.84494	999999095	647	9.05e-07	6.47e-07	8.96396e-07	6.40753e-07	8.97975e-07	6.41947e-07	8.98457e-07	6.42303e-07	8.99052e-07	6.42714e-07	0.0164853
21	0.443556	0.329725	0.835236	999997970	1125	2.03e-06	1.125e-06	2.00985e-06	1.11346e-06	2.01394e-06	1.11596e-06	2.01519e-06	1.11674e-06	2.01642e-06	1.11737e-06	0.017735
22	0.443556	0.329724	0.85901	999996255	1715	3.745e-06	1.715e-06	3.70607e-06	1.69622e-06	3.71465e-06	1.70071e-06	3.71743e-06	1.70224e-06	3.71957e-06	1.70314e-06	0.0187907
23	0.443556	0.329724	0.843935	999993750	2505	6.25e-06	2.50501e-06	6.18173e-06	2.47565e-06	6.19787e-06	2.48322e-06	6.20357e-06	2.48614e-06	6.20693e-06	2.48736e-06	0.0203176
24	0.443557	0.329722	0.848093	999990190	3560	9.81e-06	3.56002e-06	9.69703e-06	3.5153e-06	9.72535e-06	3.52748e-06	9.73636e-06	3.53278e-06	9.74146e-06	3.53453e-06	0.0222331
25	0.443558	0.329721	0.824299	999985644	4546	1.4356e-05	4.54604e-06	1.4182e-05	4.48492e-06	1.42275e-05	4.50211e-06	1.42469e-05	4.5105e-06	1.42545e-05	4.513e-06	0.0224537
26	0.443558	0.329719	0.842331	999979690	5954	2.031e-05	5.95409e-06	2.00506e-05	5.86865e-06	2.01204e-05	5.89291e-06	2.0153e-05	5.90616e-06	2.01647e-05	5.91027e-06	0.0237106
27	0.44356	0.329717	0.839382	999972005	7685	2.7995e-05	7.68516e-06	2.76184e-05	7.56777e-06	2.77212e-05	7.60085e-06	2.7774e-05	7.62098e-06	2.77925e-05	7.62782e-06	0.0250339
28	0.443561	0.329714	0.844699	999962598	9407	3.7402e-05	9.40726e-06	3.68729e-05	9.25456e-06	3.7018e-05	9.2968e-06	3.70992e-05	9.32521e-06	3.71287e-05	9.33617e-06	0.0253483
29	0.443563	0.32971	0.838379	999950564	12034	4.9436e-05	1.20345e-05	4.87003e-05	1.18274e-05	4.89009e-05	1.18829e-05	4.90233e-05	1.19241e-05	4.90707e-05	1.1942e-05	0.0270637
30	0.443565	0.329706	0.84293	999935443	15121	6.4557e-05	1.51217e-05	6.35466e-05	1.48463e-05	6.38188e-05	1.49178e-05	6.39983e-05	1.4975e-05	6.40736e-05	1.50029e-05	0.0285875
31	0.443567	0.3297	0.844853	999916689	18754	8.3311e-05	1.87552e-05	8.19407e-05	1.8394e-05	8.23039e-05	1.84852e-05	8.25599e-05	1.85616e-05	8.26769e-05	1.86033e-05	0.0299858
32	0.443571	0.329692	0.837485	999893038	23651	0.000106962	2.3653e-05	0.000105112	2.31718e-05	0.000105594	2.32902e-05	0.000105952	2.3392e-05	0.000106131	2.3454e-05	0.0321439
33	0.443575	0.329684	0.842113	999864211	28827	0.000135789	2.88301e-05	0.000133324	2.82114e-05	0.000133954	2.83599e-05	0.000134441	2.84893e-05	0.000134707	2.85763e-05	0.0334483
34	0.44358	0.329673	0.836855	999828840	35371	0.00017116	3.53758e-05	0.000167899	3.45755e-05	0.000168718	3.47637e-05	0.000169368	3.49269e-05	0.000169755	3.50479e-05	0.0351733
35	0.443586	0.329659	0.840965	999785316	43524	0.000214684	4.35315e-05	0.000210393	4.24936e-05	0.000211451	4.27334e-05	0.000212307	4.29393e-05	0.000212859	4.31038e-05	0.0372203
36	0.443594	0.329643	0.843906	999731542	53774	0.000268458	5.37855e-05	0.000262828	5.24348e-05	0.000264193	5.27418e-05	0.00026531	5.30031e-05	0.000266081	5.32223e-05	0.0396711
37	0.443603	0.329622	0.840693	999665526	66016	0.000334474	6.60337e-05	0.000327115	6.4287e-05	0.000328871	6.46785e-05	0.000330319	6.50089e-05	0.000331374	6.52931e-05	0.0421387
38	0.443614	0.329597	0.841543	999584975	80551	0.000415025	8.0578e-05	0.000405447	7.83322e-05	0.000407702	7.88308e-05	0.000409565	7.92457e-05	0.000410982	7.96073e-05	0.0446122
39	0.443628	0.329567	0.842763	999486957	98018	0.000513043	9.80587e-05	0.000500625	9.51784e-05	0.000503516	9.58136e-05	0.0005059	9.6335e-05	0.000507769	9.67874e-05	0.0472314
40	0.443645	0.32953	0.842709	999367488	119469	0.000632512	0.00011953	0.000616454	0.000115829	0.000620156	0.000116641	0.000623199	0.000117299	0.000625633	0.000117864	0.0502236
41	0.443666	0.329485	0.843157	999222181	145307	0.000777819	0.000145399	0.000757105	0.000140651	0.000761845	0.000141688	0.000765717	0.000142518	0.000768857	0.000143224	0.0534401
42	0.443691	0.32943	0.840214	999044462	177719	0.000955538	0.000177857	0.000928832	0.000171727	0.000934909	0.000173065	0.000939835	0.000174118	0.000943865	0.000175008	0.0573427
43	0.443721	0.329364	0.843355	998830017	214445	0.00116998	0.00021465	0.00113566	0.000206832	0.00114345	0.000208538	0.0011497	0.000209866	0.00115483	0.00021097	0.0608849
44	0.443758	0.329283	0.844255	998570282	259735	0.00142972	0.000260039	0.00138568	0.000250018	0.00139566	0.00025221	0.00140359	0.000253894	0.00141011	0.000255275	0.0650915
45	0.443803	0.329186	0.840571	998257094	313188	0.00174291	0.000313636	0.00168651	0.000300823	0.0016993	0.000303645	0.00170937	0.000305773	0.00171761	0.000307499	0.0695069
46	0.443856	0.329069	0.841232	997878494	378600	0.00212151	0.000379261	0.00204931	0.000362801	0.00206577	0.000366468	0.00207854	0.000369171	0.00208894	0.000371333	0.0746709
47	0.443921	0.328928	0.842528	997423548	454946	0.00257645	0.000455913	0.00248416	0.000434849	0.00250538	0.000439607	0.00252157	0.000443031	0.00253467	0.000445729	0.0800376
48	0.443998	0.328759	0.841482	996879150	544398	0.00312085	0.000545804	0.00300305	0.000518898	0.00303045	0.000525072	0.00305097	0.000529403	0.00306744	0.000532772	0.0857693
49	0.44409	0.328558	0.840439	996228371	650779	0.00377163	0.000652816	0.00362145	0.000618396	0.00365688	0.000626433	0.0036829	0.000631926	0.00370359	0.000636143	0.0922047
50	0.444201	0.328317	0.840473	995452541	775830	0.00454746	0.000778767	0.00435619	0.000734742	0.00440208	0.0007452	0.00443509	0.00075219	0.00446105	0.000757462	0.099293
51	0.444331	0.328032	0.840991	994532707	919834	0.00546729	0.000924036	0.00522409	0.000867896	0.00528353	0.000881449	0.00532545	0.000890358	0.00535797	0.000896926	0.106837
52	0.444486	0.327693	0.840248	993442274	1090433	0.00655773	0.00109643	0.00624875	0.00102466	0.0063258	0.00104226	0.00637912	0.00105367	0.00641985	0.00106187	0.115503
53	0.444668	0.327294	0.840828	992159102	1283172	0.0078409	0.00129164	0.00744915	0.00120039	0.00754886	0.00122307	0.00761673	0.00123762	0.00766768	0.00124783	0.124585
54	0.444882	0.326826	0.840569	990657145	1501957	0.00934286	0.00151383	0.00884736	0.00139822	0.00897608	0.00142722	0.0090625	0.00144577	0.00912612	0.00145845	0.134369
55	0.445131	0.32628	0.839721	988904727	1752418	0.0110953	0.00176894	0.0104701	0.00162271	0.0106357	0.00165961	0.0107457	0.00168323	0.0108251	0.00169902	0.145231
56	0.445421	0.325646	0.839238	986871172	2033555	0.0131288	0.00205637	0.0123423	0.00187218	0.0125544	0.00191873	0.0126944	0.00194869	0.0127935	0.00196839	0.156969
57	0.445756	0.324909	0.839307	984516051	2355121	0.0154839	0.00238645	0.0144969	0.00215468	0.0147675	0.00221307	0.0149455	0.00225108	0.0150693	0.00227572	0.170245
58	0.446143	0.324059	0.83899	981803521	2712530	0.0181965	0.00275519	0.0169618	0.00246485	0.017305	0.00253754	0.017531	0.00258548	0.0176855	0.00261624	0.184629
59	0.446586	0.323082	0.837895	978694475	3109046	0.0213055	0.00316667	0.0197663	0.0028045	0.0201993	0.0028943	0.0204853	0.00295434	0.0206782	0.00299274	0.200332
60	0.447093	0.321964	0.83756	975145488	3548987	0.0248545	0.00362625	0.0229426	0.00317631	0.0234857	0.00328631	0.0238464	0.00336103	0.0240871	0.00340887	0.217629
61	0.44767	0.32069	0.836984	971115516	4029972	0.0288845	0.00413269	0.0265192	0.00357662	0.0271958	0.00371017	0.0276488	0.00380242	0.0279489	0.0038618	0.236393
62	0.448323	0.319244	0.836088	966557936	4557580	0.0334421	0.00469314	0.0305279	0.00400869	0.0313655	0.00416968	0.0319315	0.00428269	0.0323051	0.00435625	0.257004
63	0.449059	0.317608	0.835581	961423861	5134075	0.0385761	0.00531171	0.0350002	0.00447234	0.0360308	0.00466528	0.0367343	0.00480288	0.0371987	0.00489359	0.27965
64	0.449887	0.315765	0.834652	955667451	5756410	0.0443325	0.00598738	0.0399631	0.00496283	0.0412233	0.00519254	0.0420932	0.00535881	0.0426687	0.00546997	0.304253
65	0.450811	0.313696	0.833906	949242111	6425340	0.0507579	0.00672341	0.0454415	0.00547847	0.046974	0.00575062	0.0480429	0.00594977	0.0487538	0.00608505	0.330976
66	0.451843	0.311382	0.832716	942095050	7147061	0.0579049	0.00752923	0.0514634	0.0060219	0.053317	0.00634305	0.0546228	0.00657991	0.0554973	0.0067435	0.360279
67	0.452986	0.308802	0.83169	934185233	7909817	0.0658148	0.00839599	0.0580433	0.0065799	0.0602742	0.0069572	0.0618594	0.00723661	0.06293	0.00743274	0.391733
68	0.454248	0.305939	0.830334	925470161	8715072	0.0745298	0.00932906	0.0651937	0.00715032	0.067866	0.00759179	0.0697787	0.0079193	0.0710829	0.00815286	0.425615
69	0.455635	0.302774	0.828897	915914340	9555821	0.0840857	0.0103254	0.0729173	0.00772359	0.0761044	0.00823846	0.0783985	0.00861978	0.0799787	0.0088958	0.461807
70	0.457152	0.299289	0.827121	905481290	10433050	0.0945187	0.0113909	0.0812137	0.00829647	0.085	0.00889558	0.087736	0.00933748	0.0896395	0.00966085	0.500602
71	0.458805	0.295463	0.825436	894141805	11339485	0.105858	0.0125232	0.0900724	0.00885869	0.0945543	0.00955431	0.0977999	0.0100638	0.100079	0.0104396	0.54192
72	0.460595	0.291285	0.823199	881886631	12255174	0.118113	0.0137061	0.099462	0.00938961	0.104749	0.0101947	0.108579	0.0107792	0.111291	0.0112121	0.585095
73	0.462526	0.286736	0.82108	868692336	13194295	0.131308	0.0149614	0.109357	0.00989539	0.115574	0.0108253	0.120073	0.0114937	0.123281	0.0119895	0.631101
74	0.464597	0.281803	0.818336	854551011	14141325	0.145449	0.0162789	0.119717	0.01036	0.127004	0.0114299	0.132265	0.0121918	0.136037	0.0127561	0.679517
75	0.466808	0.276473	0.815734	839468894	15082117	0.160531	0.0176492	0.130487	0.0107696	0.138998	0.0119935	0.145124	0.0128595	0.149535	0.0134983	0.72999
76	0.469153	0.270739	0.81266	823462335	16006559	0.176538	0.0190675	0.141601	0.011114	0.151502	0.0125047	0.158611	0.0134866	0.163741	0.0142059	0.782352
77	0.471627	0.264597	0.809187	806559255	16903080	0.193441	0.0205268	0.152982	0.0113806	0.164453	0.0129507	0.172672	0.0140611	0.178609	0.0148674	0.836348
78	0.474221	0.258041	0.805487	788781512	17777743	0.211218	0.0220415	0.164551	0.0115693	0.177786	0.0133329	0.187258	0.0145858	0.194095	0.0154864	0.892583
79	0.476924	0.251076	0.801205	770180863	18600649	0.229819	0.0235815	0.176209	0.0116581	0.191413	0.0136269	0.202292	0.0150342	0.210131	0.0160364	0.949867
80	0.479719	0.243704	0.796595	750801708	19379155	0.249198	0.0251618	0.18786	0.0116513	0.205251	0.013838	0.217702	0.0154105	0.226655	0.0165233	1.00882
81	0.482586	0.235944	0.791372	730724982	20076726	0.269275	0.0267404	0.199388	0.0115276	0.219191	0.0139401	0.233387	0.0156844	0.243571	0.016916	1.06778
82	0.4855	0.227809	0.786066	710025200	20699782	0.289975	0.0283277	0.21068	0.0112916	0.233128	0.0139369	0.249246	0.0158597	0.26079	0.0172194	1.12719
83	0.488434	0.219323	0.779644	688771456	21253744	0.311229	0.0299338	0.221629	0.0109494	0.246959	0.0138314	0.265186	0.0159398	0.278228	0.0174377	1.18744
84	0.491352	0.210519	0.773014	667078555	21692901	0.332921	0.0314951	0.232115	0.0104857	0.260555	0.0135962	0.281079	0.0158923	0.295761	0.0175335	1.24605
85	0.494218	0.201437	0.765466	645042388	22036167	0.354958	0.0330338	0.242038	0.009923	0.273804	0.0132488	0.296814	0.0157353	0.313285	0.0175234	1.30391
86	0.496984	0.192122	0.75715	622772135	22270253	0.377228	0.0345253	0.251306	0.00926866	0.286591	0.012787	0.312277	0.0154631	0.330683	0.0173981	1.36003
87	0.499604	0.182629	0.747693	600384176	22387959	0.399616	0.0359489	0.259841	0.00853507	0.298804	0.0122125	0.32735	0.0150735	0.347836	0.0171531	1.41364
88	0.502021	0.17301	0.737967	577988796	22395380	0.422011	0.0373017	0.267583	0.00774141	0.310341	0.0115375	0.341925	0.0145744	0.364632	0.016796	1.46461
89	0.504178	0.163336	0.72668	555708268	22280528	0.444292	0.0385484	0.274485	0.0069024	0.321111	0.0107697	0.355889	0.0139645	0.380955	0.0163228	1.51156
90	0.506012	0.153675	0.714369	533659488	22048780	0.466341	0.0396769	0.280527	0.00604148	0.33104	0.00992868	0.369146	0.0132564	0.396699	0.0157443	1.55403
91	0.507458	0.144112	0.700779	511978964	21680524	0.488021	0.0406261	0.285704	0.00517698	0.340063	0.00902322	0.381594	0.0124484	0.411753	0.0150537	1.58962
92	0.508451	0.134705	0.686029	490749177	21229787	0.509251	0.0414661	0.290049	0.00434563	0.348156	0.00809354	0.393175	0.0115807	0.426046	0.0142937	1.62109
93	0.508925	0.125537	0.670175	470096848	20652329	0.529903	0.0420833	0.293608	0.00355881	0.355295	0.00713889	0.403814	0.0106396	0.439486	0.01344	1.64399
94	0.508822	0.116676	0.652477	450106074	19990774	0.549894	0.0425248	0.296451	0.00284289	0.361488	0.00619304	0.413477	0.00966294	0.452016	0.0125294	1.66015
95	0.508094	0.108183	0.633076	430852990	19253084	0.569147	0.0427745	0.298662	0.00221151	0.366764	0.00527544	0.422147	0.00866976	0.463591	0.0115755	1.66896
96	0.5067	0.100118	0.611949	412412594	18440396	0.587587	0.0427997	0.300334	0.00167144	0.371167	0.00440329	0.429822	0.00767471	0.474179	0.010588	1.66913
97	0.504613	0.092521	0.589383	394836581	17576013	0.605163	0.0426175	0.301561	0.00122751	0.374765	0.00359772	0.436522	0.00670059	0.483767	0.00958763	1.66132
98	0.501828	0.0854291	0.565005	378168806	16667775	0.621831	0.0422144	0.302437	0.000875725	0.377637	0.00287219	0.442284	0.00576155	0.492354	0.00858682	1.64499
99	0.498359	0.0788622	0.538894	362429679	15739127	0.63757	0.0416193	0.303045	0.000607452	0.379875	0.00223826	0.44716	0.0048759	0.499962	0.00760782	1.62129
100	0.494248	0.0728293	0.511037	347625547	14804132	0.652374	0.0408469	0.303455	0.000410297	0.381576	0.00170048	0.451216	0.00405641	0.506628	0.00666637	1.59076
101	0.489559	0.0673276	0.482068	333754385	13871162	0.666246	0.0399026	0.303725	0.000270072	0.382833	0.00125728	0.454528	0.00331223	0.512401	0.00577304	1.55361
102	0.484374	0.0623385	0.452289	320788019	12966366	0.679212	0.03885	0.303898	0.000173295	0.383739	0.000905571	0.457183	0.00265415	0.517344	0.00494323	1.51231
103	0.478818	0.0578484	0.421125	308708129	12079890	0.691292	0.0376569	0.304006	0.000107994	0.384373	0.000634677	0.459264	0.00208161	0.52152	0.00417566	1.4656
104	0.473002	0.0538209	0.390242	297463003	11245126	0.702537	0.0364264	0.304072	6.53904e-05	0.384807	0.000434006	0.460863	0.00159917	0.525004	0.00348368	1.41749
105	0.467066	0.0502222	0.359276	287000822	10462181	0.712999	0.0351714	0.30411	3.83962e-05	0.385097	0.000289959	0.462065	0.00120174	0.52787	0.00286669	1.36846
106	0.461143	0.0470155	0.329213	277270936	9729886	0.722729	0.0339019	0.304132	2.17949e-05	0.385287	0.000189441	0.462947	0.000881917	0.530194	0.00232335	1.31892
107	0.455347	0.0441574	0.300297	268199742	9071194	0.7318	0.032716	0.304144	1.19286e-05	0.385408	0.000121237	0.463581	0.000633532	0.53205	0.00185683	1.27265
108	0.449784	0.0416109	0.273143	259733493	8466249	0.740267	0.031567	0.30415	6.30736e-06	0.385484	7.56883e-05	0.464025	0.000444817	0.533509	0.0014589	1.22784
109	0.444534	0.0393344	0.248039	251797862	7935631	0.748202	0.030553	0.304153	3.17425e-06	0.38553	4.61457e-05	0.464332	0.000306276	0.534638	0.00112853	1.18831
110	0.439651	0.0372945	0.225247	244341621	7456241	0.755658	0.029612	0.304155	1.52853e-06	0.385557	2.73644e-05	0.464538	0.00020665	0.535494	0.000856461	1.15164
111	0.435164	0.0354567	0.204975	237304169	7037452	0.762696	0.0288017	0.304156	7.03745e-07	0.385573	1.57639e-05	0.464675	0.000137019	0.536132	0.000637875	1.12006
112	0.431073	0.0337919	0.187037	230634492	6669677	0.769366	0.028106	0.304156	3.00135e-07	0.385582	8.77063e-06	0.464764	8.91402e-05	0.536598	0.00046581	1.09295
113	0.427364	0.0322726	0.171336	224279359	6355133	0.775721	0.027555	0.304156	1.27103e-07	0.385586	4.73457e-06	0.464821	5.68149e-05	0.536932	0.000333899	1.07147
114	0.424004	0.0308774	0.157732	218201790	6077569	0.781798	0.0270982	0.304156	3.03878e-08	0.385589	2.43103e-06	0.464857	3.53411e-05	0.537166	0.000234564	1.05367
115	0.42096	0.0295898	0.146049	212379900	5821890	0.78762	0.0266812	0.304156	0	0.38559	1.19349e-06	0.464878	2.13663e-05	0.537328	0.000161354	1.03742
116	0.41817	0.0283898	0.136015	206767969	5611931	0.793232	0.026424	0.304156	0	0.385591	5.61193e-07	0.464891	1.25707e-05	0.537437	0.000109264	1.02739
117	0.415599	0.0272666	0.127345	201352450	5415519	0.798648	0.0261913	0.304156	0	0.385591	2.43698e-07	0.464898	7.12141e-06	0.537509	7.23784e-05	1.01832
118	0.413209	0.0262104	0.119602	196112083	5240367	0.803888	0.0260258	0.304156	0	0.385591	1.04807e-07	0.464902	3.90407e-06	0.537556	4.68489e-05	1.01187
119	0.410962	0.0252123	0.112791	191030330	5081753	0.80897	0.0259125	0.304156	0	0.385591	2.54088e-08	0.464904	2.0327e-06	0.537586	2.95504e-05	1.00744
120	0.408816	0.0242641	0.106875	186091064	4939266	0.813909	0.0258559	0.304156	0	0.385591	0	0.464905	1.01255e-06	0.537604	1.81271e-05	1.00523
