# Supplementary material for: Quantifying the Potential for Future Gene Therapy to Lower Lifetime Risk of Polygenic Late-Onset Diseases
Source: MDPI journal article supplement (doi:10.3390/ijms20133352), 2019-07-08
Supplement: s2 [file s2 › SuppFiles/Results/LODsCommonLow/T2D/-1.000/IndividualsByBetaDistrib.csv]

nEntry	Beta	nDetrimentalCount	nFractionPopulation	nCumulativeFractionPopulation	nEditsNeeded	nIndividuals
0	-19.8	0	0	1	0	0
1	-19.6	0	0	1	0	0
2	-19.4	0	0	1	0	0
3	-19.2	0	0	1	0	0
4	-19	0	0	1	0	0
5	-18.8	0	0	1	0	0
6	-18.6	0	0	1	0	0
7	-18.4	0	0	1	0	0
8	-18.2	0	0	1	0	0
9	-18	0	0	1	0	0
10	-17.8	0	0	1	0	0
11	-17.6	0	0	1	0	0
12	-17.4	0	0	1	0	0
13	-17.2	0	0	1	0	0
14	-17	0	0	1	0	0
15	-16.8	1053	1e-09	1	0	1
16	-16.6	0	0	1	0	0
17	-16.4	1080	1e-09	1	0	1
18	-16.2	1059	1e-09	1	0	1
19	-16	1059	3e-09	1	0	3
20	-15.8	1071	1e-09	0.99999999	0	1
21	-15.6	1071.6	5e-09	0.99999999	0	5
22	-15.4	1072	6e-09	0.99999999	0	6
23	-15.2	1078.9	7e-09	0.99999998	0	7
24	-15	1068.7	1e-08	0.99999998	0	10
25	-14.8	1079.8	1.6e-08	0.99999996	0	16
26	-14.6	1082.1	2.6e-08	0.99999995	0	26
27	-14.4	1082.4	3.6e-08	0.99999992	0	36
28	-14.2	1083.8	5.9e-08	0.99999989	0	59
29	-14	1086	7.1e-08	0.99999983	0	71
30	-13.8	1087.2	1.13e-07	0.99999976	0	113
31	-13.6	1088.9	1.9e-07	0.99999964	0	190
32	-13.4	1090.8	2.36e-07	0.99999945	0	236
33	-13.2	1092.5	3.44e-07	0.99999922	0	344
34	-13	1094.6	5.04e-07	0.99999887	0	504
35	-12.8	1096.3	7.07e-07	0.99999837	0	707
36	-12.6	1098.6	1.008e-06	0.99999766	0	1008
37	-12.4	1100.8	1.322e-06	0.99999666	0	1322
38	-12.2	1102.2	1.905e-06	0.99999533	0	1905
39	-12	1104.4	2.542e-06	0.99999343	0	2542
40	-11.8	1106.3	3.584e-06	0.99999089	0	3584
41	-11.6	1108.3	4.838e-06	0.9999873	0	4838
42	-11.4	1110.3	6.6e-06	0.99998246	0	6600
43	-11.2	1112.2	8.928e-06	0.99997586	0	8928
44	-11	1113.9	1.1999e-05	0.99996694	0	11999
45	-10.8	1115.9	1.5905e-05	0.99995494	0	15905
46	-10.6	1117.6	2.1043e-05	0.99993903	0	21043
47	-10.4	1119.6	2.7897e-05	0.99991799	0	27897
48	-10.2	1121.5	3.5832e-05	0.99989009	0	35832
49	-10	1123.5	4.698e-05	0.99985426	0	46980
50	-9.8	1125.3	6.1033e-05	0.99980728	0	61033
51	-9.6	1127.2	7.8189e-05	0.99974625	0	78189
52	-9.4	1129.2	0.000100588	0.99966806	0	100588
53	-9.2	1131	0.000128514	0.99956747	0	128514
54	-9	1132.9	0.000163436	0.99943896	0	163436
55	-8.8	1134.8	0.00020475	0.99927552	0	204750
56	-8.6	1136.7	0.000257021	0.99907077	0	257021
57	-8.4	1138.6	0.000320451	0.99881375	0	320451
58	-8.2	1140.5	0.000398131	0.9984933	0	398131
59	-8	1142.4	0.00049123	0.99809517	0	491230
60	-7.8	1144.3	0.00060366	0.99760394	0	603660
61	-7.6	1146.2	0.000737325	0.99700028	0	737325
62	-7.4	1148.1	0.000895685	0.99626295	0	895685
63	-7.2	1150	0.001081963	0.99536727	0	1081963
64	-7	1151.9	0.001301898	0.9942853	0	1301898
65	-6.8	1153.8	0.00155517	0.99298341	0	1555170
66	-6.6	1155.7	0.001844731	0.99142824	0	1844731
67	-6.4	1157.6	0.002181746	0.98958351	0	2181746
68	-6.2	1159.5	0.002568041	0.98740176	0	2568041
69	-6	1161.4	0.003006348	0.98483372	0	3006348
70	-5.8	1163.2	0.003495405	0.98182737	0	3495405
71	-5.6	1165.1	0.004044392	0.97833196	0	4044392
72	-5.4	1167	0.004656608	0.97428757	0	4656608
73	-5.2	1168.9	0.005335845	0.96963097	0	5335845
74	-5	1170.8	0.006077909	0.96429512	0	6077909
75	-4.8	1172.7	0.006882712	0.95821721	0	6882712
76	-4.6	1174.6	0.007758833	0.9513345	0	7758833
77	-4.4	1176.5	0.008700781	0.94357567	0	8700781
78	-4.2	1178.4	0.009706297	0.93487489	0	9706297
79	-4	1180.3	0.010769558	0.92516859	0	10769558
80	-3.8	1182.2	0.0118946	0.91439903	0	11894600
81	-3.6	1184.1	0.013052006	0.90250443	0	13052006
82	-3.4	1186	0.014255478	0.88945242	0	14255478
83	-3.2	1187.9	0.015483711	0.87519695	0	15483711
84	-3	1189.8	0.016732526	0.85971323	0	16732526
85	-2.8	1191.7	0.017986438	0.84298071	0	17986438
86	-2.6	1193.6	0.019229245	0.82499427	0	19229245
87	-2.4	1195.5	0.020466786	0.80576503	0	20466786
88	-2.2	1197.3	0.021665782	0.78529824	0	21665782
89	-2	1199.2	0.02279782	0.76363246	0	22797820
90	-1.8	1201.1	0.023877678	0.74083464	0	23877678
91	-1.6	1203	0.024885805	0.71695696	0	24885805
92	-1.4	1204.9	0.025786738	0.69207116	0	25786738
93	-1.2	1206.8	0.026590469	0.66628442	0	26590469
94	-1	1208.7	0.027280581	0.63969395	0	27280581
95	-0.8	1210.6	0.02783715	0.61241337	0	27837150
96	-0.6	1212.5	0.02825443	0.58457622	0	28254430
97	-0.4	1214.4	0.028539888	0.55632179	0	28539888
98	-0.2	1216.3	0.028673387	0.5277819	0	28673387
99	0	1218.2	0.028661527	0.49910851	0	28661527
100	0.2	1220	0.028488379	0.47044698	1.8886	28488379
101	0.4	1221.9	0.028188405	0.44195861	3.7798	28188405
102	0.6	1223.8	0.027744076	0.4137702	5.6705	27744076
103	0.8	1225.7	0.027159608	0.38602612	7.5627	27159608
104	1	1227.6	0.026452124	0.35886652	9.4508	26452124
105	1.2	1229.5	0.025644738	0.33241439	11.343	25644738
106	1.4	1231.4	0.024715531	0.30676965	13.236	24715531
107	1.6	1233.3	0.02371767	0.28205412	15.122	23717670
108	1.8	1235.2	0.022633962	0.25833645	17.012	22633962
109	2	1237.1	0.021484168	0.23570249	18.899	21484168
110	2.2	1239	0.020293811	0.21421832	20.793	20293811
111	2.4	1240.8	0.019068824	0.19392451	22.682	19068824
112	2.6	1242.7	0.017831466	0.17485569	24.572	17831466
113	2.8	1244.6	0.016588808	0.15702422	26.463	16588808
114	3	1246.5	0.015353088	0.14043542	28.353	15353088
115	3.2	1248.4	0.014133864	0.12508233	30.246	14133864
116	3.4	1250.3	0.012949058	0.11094846	32.13	12949058
117	3.6	1252.2	0.011802517	0.097999405	34.016	11802517
118	3.8	1254.1	0.010697995	0.086196888	35.901	10697995
119	4	1256	0.009656414	0.075498893	37.799	9656414
120	4.2	1257.8	0.008667816	0.065842479	39.684	8667816
121	4.4	1259.7	0.007740466	0.057174663	41.574	7740466
122	4.6	1261.6	0.006878981	0.049434197	43.461	6878981
123	4.8	1263.5	0.006078384	0.042555216	45.353	6078384
124	5	1265.4	0.005353781	0.036476832	47.232	5353781
125	5.2	1267.3	0.004682547	0.031123051	49.124	4682547
126	5.4	1269.2	0.004077384	0.026440504	51.017	4077384
127	5.6	1271.1	0.003533259	0.02236312	52.9	3533259
128	5.8	1273	0.003045175	0.018829861	54.796	3045175
129	6	1274.8	0.002613493	0.015784686	56.677	2613493
130	6.2	1276.7	0.00222842	0.013171193	58.554	2228420
131	6.4	1278.6	0.001891918	0.010942773	60.445	1891918
132	6.6	1280.5	0.001597958	0.009050855	62.325	1597958
133	6.8	1282.4	0.001343651	0.007452897	64.233	1343651
134	7	1284.3	0.001126405	0.006109246	66.117	1126405
135	7.2	1286.2	0.000935776	0.004982841	68.003	935776
136	7.4	1288	0.000775369	0.004047065	69.871	775369
137	7.6	1289.9	0.000639676	0.003271696	71.777	639676
138	7.8	1291.8	0.000523469	0.00263202	73.681	523469
139	8	1293.7	0.000427097	0.002108551	75.558	427097
140	8.2	1295.6	0.000347291	0.001681454	77.419	347291
141	8.4	1297.4	0.00028096	0.001334163	79.289	280960
142	8.6	1299.4	0.00022499	0.001053203	81.217	224990
143	8.8	1301.3	0.000180333	0.000828213	83.104	180333
144	9	1303.2	0.000142957	0.00064788	84.996	142957
145	9.2	1305	0.000112947	0.000504923	86.856	112947
146	9.4	1306.9	8.9402e-05	0.000391976	88.759	89402
147	9.6	1308.8	7.0182e-05	0.000302574	90.638	70182
148	9.8	1310.7	5.4505e-05	0.000232392	92.532	54505
149	10	1312.6	4.2502e-05	0.000177887	94.396	42502
150	10.2	1314.4	3.2736e-05	0.000135385	96.2	32736
151	10.4	1316.3	2.5312e-05	0.000102649	98.189	25312
152	10.6	1318.2	1.9374e-05	7.7337e-05	100.09	19374
153	10.8	1320	1.4604e-05	5.7963e-05	101.83	14604
154	11	1322	1.1091e-05	4.3359e-05	103.87	11091
155	11.2	1323.8	8.511e-06	3.2268e-05	105.59	8511
156	11.4	1325.9	6.233e-06	2.3757e-05	107.75	6233
157	11.6	1327.7	4.673e-06	1.7524e-05	109.57	4673
158	11.8	1329.5	3.464e-06	1.2851e-05	111.32	3464
159	12	1331.3	2.556e-06	9.387e-06	113.16	2556
160	12.2	1333	1.875e-06	6.831e-06	114.8	1875
161	12.4	1335	1.388e-06	4.956e-06	116.8	1388
162	12.6	1336.5	1.058e-06	3.568e-06	118.32	1058
163	12.8	1339.1	7.07e-07	2.51e-06	120.91	707
164	13	1341.4	5.28e-07	1.803e-06	123.26	528
165	13.2	1342.3	3.78e-07	1.275e-06	124.15	378
166	13.4	1344.3	2.64e-07	8.97e-07	126.19	264
167	13.6	1345.3	1.79e-07	6.33e-07	127.1	179
168	13.8	1348	1.47e-07	4.54e-07	129.85	147
169	14	1349.5	9.5e-08	3.07e-07	131.31	95
170	14.2	1350.7	6.9e-08	2.12e-07	132.51	69
171	14.4	1356.1	3.4e-08	1.43e-07	137.93	34
172	14.6	1357.2	3.8e-08	1.09e-07	139.05	38
173	14.8	1357.4	1.7e-08	7.1e-08	139.19	17
174	15	1356.2	1.7e-08	5.4e-08	138.02	17
175	15.2	1363.2	1.3e-08	3.7e-08	144.99	13
176	15.4	1364.2	5e-09	2.4e-08	146.04	5
177	15.6	1362	4e-09	1.9e-08	143.84	4
178	15.8	1376	1e-09	1.5e-08	157.84	1
179	16	1369.7	3e-09	1.4e-08	151.51	3
180	16.2	1365.7	3e-09	1.1e-08	147.51	3
181	16.4	1362	1e-09	8e-09	143.84	1
182	16.6	1383.3	3e-09	7e-09	165.17	3
183	16.8	1370	1e-09	4e-09	151.84	1
184	17	1385	1e-09	3e-09	166.84	1
185	17.2	1377	2e-09	2e-09	158.84	2
186	17.4	0	0	0	0	0
187	17.6	0	0	0	0	0
188	17.8	0	0	0	0	0
189	18	0	0	0	0	0
190	18.2	0	0	0	0	0
191	18.4	0	0	0	0	0
192	18.6	0	0	0	0	0
193	18.8	0	0	0	0	0
194	19	0	0	0	0	0
195	19.2	0	0	0	0	0
196	19.4	0	0	0	0	0
197	19.6	0	0	0	0	0
198	19.8	0	0	0	0	0
199	20	0	0	0	0	0
