# Supplementary material for: Quantifying the Potential for Future Gene Therapy to Lower Lifetime Risk of Polygenic Late-Onset Diseases
Source: MDPI journal article supplement (doi:10.3390/ijms20133352), 2019-07-08
Supplement: s2 [file s2 › SuppFiles/Results/LODsCommonLow/T2D/0.250/FrailtyAnalysis.csv]

Age	Heritability	MeanOR	CaseOR	nControls	nCases	nCumIncidence	nIncidence	nLifeIncidence0	nAbsIncidence0	nLifeIncidence5	nAbsIncidence5	nLifeIncidence10	nAbsIncidence10	nLifeIncidence15	nAbsIncidence15	nIncActDivExp
19	0.701563	0.249957	419.143	999994894	5106	5.106e-06	5.106e-06	5.05936e-06	5.05936e-06	5.06696e-06	5.06696e-06	5.06947e-06	5.06947e-06	5.07312e-06	5.07312e-06	0.279992
20	0.701548	0.249937	349.953	999983920	10974	1.608e-05	1.09741e-05	1.59274e-05	1.0868e-05	1.59553e-05	1.08883e-05	1.59638e-05	1.08943e-05	1.59744e-05	1.09013e-05	0.279614
21	0.701523	0.249904	322.441	999965279	18641	3.4721e-05	1.86413e-05	3.43771e-05	1.84497e-05	3.44465e-05	1.84912e-05	3.44679e-05	1.85041e-05	3.4489e-05	1.85146e-05	0.29387
22	0.701487	0.249855	284.268	999937714	27565	6.2286e-05	2.7566e-05	6.16403e-05	2.72632e-05	6.17819e-05	2.73354e-05	6.18278e-05	2.73599e-05	6.18634e-05	2.73744e-05	0.30203
23	0.701441	0.24979	252.264	999899999	37715	0.000100001	3.77173e-05	9.89135e-05	3.72732e-05	9.91689e-05	3.73871e-05	9.92588e-05	3.7431e-05	9.93129e-05	3.74495e-05	0.305917
24	0.701381	0.249705	229.314	999850142	49857	0.000149858	4.9862e-05	0.000148145	4.9231e-05	0.00014857	4.94016e-05	0.000148735	4.94758e-05	0.000148813	4.95003e-05	0.311398
25	0.701307	0.249597	210.376	999786018	64124	0.000213982	6.41336e-05	0.000211407	6.32625e-05	0.000212075	6.35049e-05	0.000212358	6.36232e-05	0.000212472	6.36585e-05	0.316767
26	0.701216	0.249463	191.849	999705056	80962	0.000294944	8.09793e-05	0.000291208	7.98014e-05	0.000292207	8.01313e-05	0.000292669	8.03115e-05	0.000292839	8.03673e-05	0.322479
27	0.701106	0.249297	176.715	999604092	100964	0.000395908	0.000100994	0.000390632	9.94238e-05	0.000392065	9.98584e-05	0.000392792	0.000100123	0.000393052	0.000100213	0.328981
28	0.700973	0.249097	165.169	999480068	124024	0.000519932	0.000124073	0.000512646	0.000122014	0.000514636	0.000122571	0.000515738	0.000122946	0.000516142	0.00012309	0.334321
29	0.700818	0.248857	150.855	999329880	150188	0.00067012	0.000150266	0.000660256	0.000147609	0.000662939	0.000148302	0.000664554	0.000148816	0.000665182	0.00014904	0.337926
30	0.700635	0.248571	140.006	999148436	181444	0.000851564	0.000181566	0.000838404	0.000178148	0.000841945	0.000179006	0.000844246	0.000179692	0.000845209	0.000180027	0.343248
31	0.700422	0.248233	128.721	998930927	217509	0.00106907	0.000217694	0.00105174	0.000213334	0.00105634	0.000214391	0.00105952	0.000215277	0.00106097	0.000215761	0.348049
32	0.700174	0.247833	118.722	998670345	260582	0.00132965	0.000260861	0.00130704	0.000255303	0.00131294	0.000256607	0.00131725	0.000257729	0.00131938	0.000258411	0.354504
33	0.699889	0.247367	108.773	998361014	309331	0.00163899	0.000309743	0.00160977	0.000302725	0.00161726	0.000304318	0.00162296	0.000305707	0.00162602	0.000306641	0.359359
34	0.699559	0.24682	100.829	997993825	367189	0.00200617	0.000367792	0.0019687	0.000358931	0.00197815	0.000360884	0.00198554	0.000362579	0.00198986	0.000363835	0.365686
35	0.699182	0.246187	92.4399	997560966	432859	0.00243903	0.000433729	0.00239131	0.000422611	0.00240314	0.000424996	0.00241258	0.000427044	0.00241854	0.00042868	0.370847
36	0.698751	0.245453	85.5415	997052407	508559	0.00294759	0.000509802	0.0028872	0.000495893	0.00290194	0.000498797	0.00291385	0.000501269	0.00292188	0.000503341	0.37602
37	0.69826	0.244607	78.4448	996456209	596198	0.00354379	0.000597961	0.00346778	0.000580584	0.00348606	0.000584119	0.00350095	0.000587103	0.00351155	0.00058967	0.381582
38	0.697702	0.243635	72.3493	995758708	697501	0.00424129	0.000699982	0.00414607	0.000678288	0.00416866	0.000682606	0.00418715	0.000686198	0.00420088	0.00068933	0.387547
39	0.69707	0.242518	65.9382	994942638	816070	0.00505736	0.000819546	0.0049385	0.000792428	0.00496638	0.000797717	0.00498921	0.000802058	0.0050067	0.000805824	0.394746
40	0.696357	0.241246	60.73	993996410	946228	0.00600359	0.000951038	0.0058559	0.000917396	0.00589021	0.000923826	0.00591825	0.00092904	0.00594022	0.000933515	0.399602
41	0.695556	0.239802	55.4875	992899980	1096430	0.00710002	0.00110305	0.00691719	0.00106129	0.00695933	0.00106912	0.00699363	0.00107538	0.00702093	0.00108071	0.405417
42	0.694657	0.238166	50.8793	991633228	1266752	0.00836677	0.00127581	0.00814124	0.00122404	0.00819291	0.00123358	0.00823472	0.00124109	0.00826836	0.00124743	0.411332
43	0.69365	0.236321	46.5702	990173433	1459795	0.00982657	0.00147211	0.00954921	0.00140797	0.00961249	0.00141958	0.00966334	0.00142862	0.0097045	0.00143614	0.41756
44	0.692528	0.23425	42.4209	988496688	1676745	0.0115033	0.00169339	0.0111632	0.00161402	0.0112407	0.00162817	0.0113024	0.00163904	0.0113525	0.00164796	0.423878
45	0.691283	0.231938	38.653	986580317	1916371	0.0134197	0.00193867	0.0130039	0.00184071	0.0130986	0.00185798	0.0131734	0.001871	0.013234	0.00188156	0.429641
46	0.689902	0.229364	35.2669	984394399	2185918	0.0156056	0.00221565	0.0150986	0.0020947	0.0152145	0.00211587	0.0153049	0.00213148	0.015378	0.00214396	0.436229
47	0.688378	0.226519	32.054	981912908	2481491	0.0180871	0.00252083	0.0174705	0.00237187	0.0176123	0.00239783	0.0177214	0.0024165	0.0178092	0.00243122	0.442543
48	0.686703	0.223392	29.1298	979110247	2802661	0.0208898	0.00285429	0.0201419	0.00267138	0.0203155	0.00270317	0.0204468	0.00272546	0.020552	0.00274281	0.448531
49	0.684865	0.219967	26.4999	975953302	3156945	0.0240467	0.0032243	0.0231417	0.00299986	0.0233543	0.00303884	0.0235123	0.00306549	0.0236379	0.00308595	0.455405
50	0.682861	0.216245	23.9764	972415642	3537660	0.0275844	0.00362483	0.0264921	0.00335031	0.0267523	0.00339799	0.0269422	0.00342987	0.0270918	0.00345391	0.462166
51	0.680683	0.212228	21.7488	968477539	3938103	0.0315225	0.00404981	0.0302078	0.00371574	0.0305261	0.00377377	0.0307541	0.00381191	0.0309319	0.00384002	0.46824
52	0.678327	0.207917	19.6418	964107933	4369606	0.0358921	0.00451183	0.0343138	0.00410605	0.0347027	0.00417658	0.0349764	0.00422228	0.035187	0.00425517	0.475299
53	0.675788	0.203324	17.7436	959288905	4819028	0.0407111	0.00499843	0.038822	0.00450815	0.039296	0.0045933	0.0396243	0.00464795	0.0398733	0.00468629	0.482124
54	0.67307	0.198473	15.9996	954011931	5276974	0.0459881	0.00550092	0.0437345	0.00491249	0.0443104	0.00501439	0.0447039	0.00507956	0.0449974	0.0051241	0.488268
55	0.670169	0.193375	14.4207	948253847	5758084	0.0517462	0.00603565	0.0490664	0.0053319	0.0497635	0.00545314	0.0502346	0.00553075	0.0505801	0.00558264	0.495529
56	0.667095	0.188065	12.9477	942015658	6238189	0.0579843	0.00657861	0.0548095	0.00574316	0.0556495	0.00588595	0.0562125	0.00597787	0.0566183	0.00603829	0.502164
57	0.663851	0.182573	11.6139	935292589	6723069	0.0647074	0.0071369	0.0609604	0.00615087	0.061967	0.00631757	0.0626386	0.00642608	0.0631147	0.0064964	0.509131
58	0.660445	0.176931	10.4188	928088072	7204517	0.0719119	0.00770296	0.0675071	0.00654667	0.0687068	0.00673975	0.0695056	0.00686706	0.0700635	0.00694876	0.516184
59	0.656895	0.171183	9.31981	920420752	7667320	0.0795792	0.00826141	0.0744234	0.00691627	0.0758445	0.00713774	0.0767914	0.00728579	0.077444	0.00738049	0.522641
60	0.653209	0.165362	8.33324	912296829	8123923	0.0877032	0.00882631	0.0816942	0.00727083	0.0833672	0.00752263	0.0844851	0.00769368	0.0852472	0.00780319	0.529712
61	0.649404	0.159506	7.44184	903736612	8560217	0.0962634	0.00938315	0.0892914	0.00759724	0.0912481	0.00788092	0.092562	0.00807686	0.0934502	0.008203	0.536723
62	0.645494	0.153648	6.64431	894760337	8976275	0.10524	0.0099324	0.0971866	0.00789522	0.0994604	0.0082123	0.100997	0.00843487	0.10203	0.00857975	0.543916
63	0.641497	0.147825	5.92664	885394508	9365829	0.114605	0.0104674	0.105345	0.00815867	0.107971	0.00851064	0.109758	0.00876164	0.110957	0.00892713	0.551087
64	0.637434	0.142071	5.28682	875675019	9719489	0.124325	0.0109776	0.113725	0.00837956	0.116738	0.00876742	0.118807	0.00904816	0.120193	0.00923585	0.557833
65	0.633317	0.136407	4.7164	865620780	10054239	0.134379	0.0114817	0.122297	0.0085726	0.125737	0.00899844	0.128117	0.00931007	0.129715	0.00952177	0.565215
66	0.629168	0.130863	4.2081	855271942	10348838	0.144728	0.0119554	0.131017	0.00871962	0.134922	0.00918465	0.137644	0.00952761	0.139479	0.00976449	0.572074
67	0.624998	0.125458	3.76261	844663626	10608316	0.155336	0.0124034	0.139842	0.00882469	0.144252	0.0093307	0.14735	0.00970544	0.149448	0.00996848	0.57871
68	0.620818	0.120203	3.36694	833817655	10845971	0.166182	0.0128406	0.14874	0.00889863	0.1537	0.00944803	0.157205	0.00985563	0.159594	0.0101463	0.585819
69	0.616653	0.115121	3.01587	822788997	11028658	0.177211	0.0132267	0.157654	0.00891402	0.163209	0.00950825	0.167154	0.00994835	0.169861	0.0102669	0.59157
70	0.612494	0.110207	2.71053	811581658	11207339	0.188418	0.0136212	0.166567	0.00891219	0.172764	0.00955577	0.177184	0.0100305	0.180239	0.0103778	0.598619
71	0.60836	0.105476	2.43833	800241864	11339794	0.199758	0.0139725	0.175426	0.00885893	0.182319	0.00955457	0.187248	0.0100641	0.190679	0.0104399	0.604636
72	0.604259	0.100929	2.19845	788798394	11443470	0.211202	0.0143	0.184193	0.0087677	0.191838	0.00951942	0.197314	0.0100653	0.201148	0.0104695	0.61045
73	0.600195	0.0965688	1.98878	777282028	11516366	0.222718	0.0145999	0.19283	0.00863699	0.201287	0.00944866	0.207346	0.010032	0.211613	0.0104648	0.61585
74	0.596171	0.0923893	1.80049	765702053	11579975	0.234298	0.014898	0.201314	0.00848355	0.210647	0.00935963	0.217329	0.00998356	0.222059	0.0104457	0.621878
75	0.592189	0.0883896	1.63597	754089655	11612398	0.24591	0.0151657	0.209606	0.00829201	0.219881	0.0092343	0.22723	0.00990114	0.232452	0.010393	0.62727
76	0.588258	0.0845691	1.48742	742468849	11620806	0.257531	0.0154104	0.217675	0.00806879	0.228959	0.00907846	0.237022	0.00979134	0.242765	0.0103135	0.632298
77	0.584376	0.0809216	1.35718	730859761	11609088	0.26914	0.0156358	0.225491	0.00781622	0.237854	0.00889459	0.246679	0.00965719	0.252976	0.0102109	0.637066
78	0.580548	0.0774429	1.23936	719278007	11581754	0.280722	0.0158468	0.233028	0.00753712	0.24654	0.00868603	0.256181	0.00950231	0.263065	0.010089	0.641724
79	0.576771	0.0741224	1.13486	707725710	11552297	0.292274	0.016061	0.240268	0.00724052	0.255003	0.00846327	0.265518	0.00933726	0.273025	0.0099597	0.646939
80	0.573044	0.0709576	1.0417	696230432	11495278	0.30377	0.0162426	0.24718	0.00691131	0.263212	0.00820838	0.27466	0.00914116	0.282826	0.00980128	0.651219
81	0.569376	0.0679448	0.957715	684813912	11416520	0.315186	0.0163976	0.253735	0.00655508	0.271139	0.00792695	0.283578	0.00891887	0.292445	0.00961922	0.654779
82	0.565766	0.065075	0.881178	673471916	11341996	0.326528	0.0165622	0.259922	0.006187	0.278775	0.0076364	0.292268	0.00868995	0.30188	0.00943501	0.659023
83	0.562212	0.0623423	0.812778	662220615	11251301	0.337779	0.0167064	0.265718	0.00579639	0.286097	0.00732207	0.300707	0.00843819	0.311111	0.00923119	0.662728
84	0.558712	0.0597393	0.750774	651062006	11158609	0.348938	0.0168503	0.271112	0.00539374	0.293091	0.00699377	0.308881	0.00817485	0.32013	0.00901906	0.666655
85	0.555264	0.0572598	0.694991	640005536	11056470	0.359994	0.0169822	0.276091	0.00497878	0.299738	0.00664748	0.316776	0.00789504	0.328923	0.00879222	0.670319
86	0.551866	0.0548961	0.644318	629050250	10955286	0.37095	0.0171175	0.28065	0.00455948	0.306028	0.00629025	0.324383	0.00760669	0.337481	0.00855854	0.674299
87	0.548523	0.0526458	0.597879	618214498	10835752	0.381786	0.0172256	0.284781	0.00413097	0.311939	0.00591085	0.331679	0.00729555	0.345783	0.00830208	0.67737
88	0.545231	0.050501	0.555795	607493358	10721140	0.392507	0.0173421	0.288487	0.00370598	0.317463	0.00552326	0.338656	0.00697705	0.353824	0.00804059	0.680917
89	0.541993	0.0484577	0.517246	596896805	10596553	0.403103	0.0174431	0.29177	0.00328276	0.322585	0.00512206	0.345297	0.0066415	0.361587	0.00776309	0.683978
90	0.538802	0.04651	0.482242	586426544	10470261	0.413573	0.0175412	0.294639	0.0028689	0.327299	0.00471481	0.351592	0.00629504	0.369063	0.00747645	0.687036
91	0.535659	0.0446522	0.449877	576078731	10347813	0.423921	0.0176455	0.29711	0.0024709	0.331606	0.00430666	0.357534	0.00594146	0.376248	0.0071849	0.690437
92	0.532563	0.0428808	0.42031	565862163	10216568	0.434138	0.0177347	0.299201	0.00209128	0.335501	0.00389491	0.363107	0.00557309	0.383127	0.00687866	0.693326
93	0.529513	0.0411906	0.393351	555777946	10084217	0.444222	0.017821	0.300939	0.00173771	0.338987	0.00348581	0.368302	0.00519514	0.38969	0.00656256	0.696178
94	0.526511	0.0395791	0.36825	545833280	9944666	0.454167	0.0178932	0.302353	0.00141423	0.342068	0.00308081	0.373109	0.00480695	0.395922	0.00623292	0.698546
95	0.523554	0.0380405	0.345157	536019985	9813295	0.46398	0.0179786	0.30348	0.0011272	0.344757	0.00268889	0.377528	0.00441898	0.401823	0.00590005	0.701481
96	0.520638	0.036571	0.324097	526341069	9678916	0.473659	0.018057	0.304357	0.000877297	0.347068	0.00231118	0.381556	0.00402827	0.40738	0.00555739	0.704197
97	0.517769	0.0351684	0.304211	516800797	9540272	0.483199	0.0181256	0.305024	0.000666293	0.349021	0.00195285	0.385193	0.00363709	0.412584	0.00520417	0.706574
98	0.51494	0.0338289	0.286035	507399932	9400865	0.4926	0.0181905	0.305518	0.000493921	0.350641	0.00161996	0.388443	0.0032496	0.417427	0.00484309	0.708841
99	0.51215	0.032548	0.269283	498130984	9268948	0.501869	0.0182675	0.305875	0.000357735	0.351959	0.00131814	0.391314	0.00287147	0.421907	0.00448033	0.711615
100	0.509399	0.0313232	0.25357	488994695	9136289	0.511005	0.0183411	0.306129	0.000253212	0.353008	0.00104944	0.393818	0.00250339	0.426022	0.00411412	0.714284
101	0.506684	0.0301523	0.239319	480001526	8993169	0.519998	0.0183911	0.306304	0.000175097	0.353823	0.000815141	0.395965	0.00214743	0.429764	0.00374287	0.716059
102	0.504013	0.0290326	0.225644	471143374	8858152	0.528857	0.0184544	0.306422	0.000118389	0.354442	0.000618653	0.397778	0.00181322	0.433142	0.00337704	0.718373
103	0.501375	0.027961	0.213068	462417986	8725388	0.537582	0.0185196	0.3065	7.8005e-05	0.3549	0.000458432	0.399282	0.00150356	0.436158	0.0030161	0.72078
104	0.498774	0.0269358	0.201345	453831062	8586924	0.546169	0.0185696	0.30655	4.9933e-05	0.355232	0.000331412	0.400503	0.00122115	0.438818	0.00266019	0.722613
105	0.496209	0.0259543	0.190323	445376643	8454419	0.554623	0.018629	0.306581	3.10277e-05	0.355466	0.000234314	0.401474	0.000971117	0.441134	0.00231655	0.724825
106	0.493677	0.0250143	0.180186	437055842	8320801	0.562944	0.0186826	0.3066	1.86386e-05	0.355628	0.000162006	0.402228	0.000754197	0.443121	0.00198688	0.726826
107	0.491179	0.0241139	0.170611	428866282	8189560	0.571134	0.018738	0.30661	1.07693e-05	0.355738	0.000109453	0.4028	0.000571959	0.444798	0.00167636	0.728906
108	0.488716	0.0232511	0.161667	420808724	8057558	0.579191	0.018788	0.306616	6.00288e-06	0.35581	7.20346e-05	0.403224	0.000423344	0.446186	0.00138848	0.730787
109	0.486287	0.0224245	0.153232	412882134	7926590	0.587118	0.0188366	0.30662	3.17064e-06	0.355856	4.60931e-05	0.40353	0.000305927	0.447313	0.00112724	0.732618
110	0.483886	0.0216315	0.145487	405082785	7799349	0.594917	0.01889	0.306621	1.59887e-06	0.355884	2.86236e-05	0.403746	0.000216159	0.448209	0.000895872	0.734648
111	0.481514	0.0208711	0.138201	397414732	7668053	0.602585	0.0189296	0.306622	7.66805e-07	0.355901	1.71764e-05	0.403895	0.000149297	0.448904	0.000695032	0.736145
112	0.47917	0.0201415	0.13133	389872643	7542089	0.610127	0.0189779	0.306622	3.39394e-07	0.355911	9.91785e-06	0.403996	0.0001008	0.449431	0.000526739	0.737986
113	0.476856	0.0194416	0.124794	382456097	7416546	0.617544	0.019023	0.306622	1.48331e-07	0.355917	5.52533e-06	0.404062	6.63039e-05	0.449821	0.000389665	0.739708
114	0.474573	0.0187697	0.118647	375160494	7295603	0.62484	0.0190757	0.306623	3.6478e-08	0.35592	2.91824e-06	0.404105	4.24239e-05	0.450102	0.000281574	0.741728
115	0.472319	0.0181246	0.112921	367988696	7171798	0.632011	0.0191166	0.306623	0	0.355921	1.47022e-06	0.404131	2.63205e-05	0.450301	0.000198766	0.743296
116	0.470095	0.0175056	0.107457	360942138	7046558	0.639058	0.0191488	0.306623	0	0.355922	7.04656e-07	0.404147	1.57843e-05	0.450438	0.000137196	0.744528
117	0.467894	0.0169105	0.102374	354008565	6933573	0.645991	0.0192097	0.306623	0	0.355922	3.12011e-07	0.404156	9.11765e-06	0.450531	9.26672e-05	0.746874
118	0.465723	0.0163393	0.0975348	347200587	6807978	0.652799	0.0192311	0.306623	0	0.355922	1.3616e-07	0.404161	5.07194e-06	0.450592	6.08633e-05	0.747692
119	0.463576	0.0157899	0.0930084	340504409	6696178	0.659496	0.0192862	0.306623	0	0.355922	3.34809e-08	0.404164	2.67847e-06	0.450631	3.89383e-05	0.74982
120	0.461452	0.0152618	0.0887494	333924554	6579855	0.666075	0.0193238	0.306623	0	0.355922	0	0.404165	1.34887e-06	0.450655	2.41481e-05	0.751271
