# Supplementary material for: Quantifying the Potential for Future Gene Therapy to Lower Lifetime Risk of Polygenic Late-Onset Diseases
Source: MDPI journal article supplement (doi:10.3390/ijms20133352), 2019-07-08
Supplement: s2 [file s2 › SuppFiles/Results/LODsCommonLow/T2D/0.250/IndividualsByBetaDistrib.csv]

nEntry	Beta	nDetrimentalCount	nFractionPopulation	nCumulativeFractionPopulation	nEditsNeeded	nIndividuals
0	-19.8	0	0	1	0	0
1	-19.6	0	0	1	0	0
2	-19.4	0	0	1	0	0
3	-19.2	0	0	1	0	0
4	-19	0	0	1	0	0
5	-18.8	0	0	1	0	0
6	-18.6	0	0	1	0	0
7	-18.4	0	0	1	0	0
8	-18.2	0	0	1	0	0
9	-18	0	0	1	0	0
10	-17.8	0	0	1	0	0
11	-17.6	0	0	1	0	0
12	-17.4	0	0	1	0	0
13	-17.2	0	0	1	0	0
14	-17	0	0	1	0	0
15	-16.8	0	0	1	0	0
16	-16.6	0	0	1	0	0
17	-16.4	0	0	1	0	0
18	-16.2	0	0	1	0	0
19	-16	1076	1e-09	1	0	1
20	-15.8	1068.5	2e-09	1	0	2
21	-15.6	1068	4e-09	1	0	4
22	-15.4	1070.4	7e-09	0.99999999	0	7
23	-15.2	1076.5	4e-09	0.99999999	0	4
24	-15	1076.4	1.8e-08	0.99999998	0	18
25	-14.8	1077.4	2.1e-08	0.99999996	0	21
26	-14.6	1077.1	2.7e-08	0.99999994	0	27
27	-14.4	1081.5	4.1e-08	0.99999992	0	41
28	-14.2	1084	6.4e-08	0.99999987	0	64
29	-14	1085.4	8.8e-08	0.99999981	0	88
30	-13.8	1088.3	1.19e-07	0.99999972	0	119
31	-13.6	1088.3	1.63e-07	0.9999996	0	163
32	-13.4	1091.1	2.5e-07	0.99999944	0	250
33	-13.2	1093.2	3.29e-07	0.99999919	0	329
34	-13	1095.1	5.21e-07	0.99999886	0	521
35	-12.8	1096.9	7.06e-07	0.99999834	0	706
36	-12.6	1098.4	1.022e-06	0.99999764	0	1022
37	-12.4	1100.4	1.376e-06	0.99999661	0	1376
38	-12.2	1102.3	1.902e-06	0.99999524	0	1902
39	-12	1104.3	2.588e-06	0.99999333	0	2588
40	-11.8	1106.3	3.552e-06	0.99999075	0	3552
41	-11.6	1108.5	4.863e-06	0.99998719	0	4863
42	-11.4	1110.2	6.618e-06	0.99998233	0	6618
43	-11.2	1112	8.974e-06	0.99997571	0	8974
44	-11	1113.8	1.1872e-05	0.99996674	0	11872
45	-10.8	1115.8	1.5666e-05	0.99995487	0	15666
46	-10.6	1117.8	2.0992e-05	0.9999392	0	20992
47	-10.4	1119.5	2.7602e-05	0.99991821	0	27602
48	-10.2	1121.6	3.5686e-05	0.99989061	0	35686
49	-10	1123.4	4.6719e-05	0.99985492	0	46719
50	-9.8	1125.3	6.0684e-05	0.9998082	0	60684
51	-9.6	1127.2	7.8372e-05	0.99974752	0	78372
52	-9.4	1129.2	0.000100282	0.99966915	0	100282
53	-9.2	1131	0.000127989	0.99956886	0	127989
54	-9	1132.9	0.00016299	0.99944088	0	162990
55	-8.8	1134.8	0.000205735	0.99927789	0	205735
56	-8.6	1136.7	0.000258016	0.99907215	0	258016
57	-8.4	1138.6	0.000321977	0.99881414	0	321977
58	-8.2	1140.5	0.000398772	0.99849216	0	398772
59	-8	1142.4	0.00049151	0.99809339	0	491510
60	-7.8	1144.3	0.000604151	0.99760188	0	604151
61	-7.6	1146.2	0.000736547	0.99699772	0	736547
62	-7.4	1148.1	0.000894698	0.99626118	0	894698
63	-7.2	1150	0.001081514	0.99536648	0	1081514
64	-7	1151.9	0.001299785	0.99428497	0	1299785
65	-6.8	1153.8	0.001554582	0.99298518	0	1554582
66	-6.6	1155.7	0.001845475	0.9914306	0	1845475
67	-6.4	1157.6	0.002182169	0.98958512	0	2182169
68	-6.2	1159.5	0.002569011	0.98740295	0	2569011
69	-6	1161.4	0.003002428	0.98483394	0	3002428
70	-5.8	1163.3	0.00349527	0.98183152	0	3495270
71	-5.6	1165.1	0.004046649	0.97833625	0	4046649
72	-5.4	1167.1	0.00466182	0.9742896	0	4661820
73	-5.2	1168.9	0.005333996	0.96962778	0	5333996
74	-5	1170.8	0.006079263	0.96429378	0	6079263
75	-4.8	1172.7	0.006883068	0.95821452	0	6883068
76	-4.6	1174.6	0.007764186	0.95133145	0	7764186
77	-4.4	1176.5	0.008705951	0.94356726	0	8705951
78	-4.2	1178.4	0.009710409	0.93486131	0	9710409
79	-4	1180.3	0.010768167	0.9251509	0	10768167
80	-3.8	1182.2	0.01188751	0.91438274	0	11887510
81	-3.6	1184.1	0.013050712	0.90249523	0	13050712
82	-3.4	1186	0.014249139	0.88944451	0	14249139
83	-3.2	1187.9	0.015489361	0.87519538	0	15489361
84	-3	1189.8	0.016738891	0.85970601	0	16738891
85	-2.8	1191.7	0.017985539	0.84296712	0	17985539
86	-2.6	1193.6	0.019240182	0.82498158	0	19240182
87	-2.4	1195.5	0.020465898	0.8057414	0	20465898
88	-2.2	1197.3	0.021665329	0.7852755	0	21665329
89	-2	1199.2	0.022803934	0.76361018	0	22803934
90	-1.8	1201.1	0.023886267	0.74080624	0	23886267
91	-1.6	1203	0.024884477	0.71691998	0	24884477
92	-1.4	1204.9	0.025784272	0.6920355	0	25784272
93	-1.2	1206.8	0.026595458	0.66625123	0	26595458
94	-1	1208.7	0.02727556	0.63965577	0	27275560
95	-0.8	1210.6	0.027832764	0.61238021	0	27832764
96	-0.6	1212.5	0.028256713	0.58454744	0	28256713
97	-0.4	1214.4	0.028533908	0.55629073	0	28533908
98	-0.2	1216.3	0.028660881	0.52775682	0	28660881
99	0	1218.2	0.028654796	0.49909594	0	28654796
100	0.2	1220	0.02848808	0.47044115	1.8872	28488080
101	0.4	1221.9	0.028190834	0.44195307	3.78	28190834
102	0.6	1223.8	0.027738104	0.41376223	5.6715	27738104
103	0.8	1225.7	0.027162957	0.38602413	7.5609	27162957
104	1	1227.6	0.026449488	0.35886117	9.4526	26449488
105	1.2	1229.5	0.025632194	0.33241168	11.341	25632194
106	1.4	1231.4	0.024729248	0.30677949	13.231	24729248
107	1.6	1233.3	0.023717335	0.28205024	15.124	23717335
108	1.8	1235.2	0.022627695	0.25833291	17.011	22627695
109	2	1237.1	0.021482403	0.23570521	18.905	21482403
110	2.2	1239	0.020300548	0.21422281	20.791	20300548
111	2.4	1240.8	0.019068709	0.19392226	22.68	19068709
112	2.6	1242.7	0.017832242	0.17485355	24.571	17832242
113	2.8	1244.6	0.016590829	0.15702131	26.466	16590829
114	3	1246.5	0.015342418	0.14043048	28.349	15342418
115	3.2	1248.4	0.014133899	0.12508806	30.242	14133899
116	3.4	1250.3	0.012943455	0.11095416	32.128	12943455
117	3.6	1252.2	0.011797423	0.098010708	34.016	11797423
118	3.8	1254.1	0.010704973	0.086213285	35.908	10704973
119	4	1256	0.009655125	0.075508312	37.796	9655125
120	4.2	1257.8	0.00867579	0.065853187	39.68	8675790
121	4.4	1259.7	0.007737288	0.057177397	41.569	7737288
122	4.6	1261.6	0.006878426	0.049440109	43.465	6878426
123	4.8	1263.5	0.006081907	0.042561683	45.354	6081907
124	5	1265.4	0.005350603	0.036479776	47.235	5350603
125	5.2	1267.3	0.004684272	0.031129173	49.133	4684272
126	5.4	1269.2	0.004075965	0.026444901	51.011	4075965
127	5.6	1271.1	0.003530569	0.022368936	52.899	3530569
128	5.8	1273	0.0030476	0.018838367	54.796	3047600
129	6	1274.8	0.002615754	0.015790767	56.681	2615754
130	6.2	1276.7	0.002229751	0.013175013	58.565	2229751
131	6.4	1278.6	0.001892978	0.010945262	60.442	1892978
132	6.6	1280.5	0.001600275	0.009052284	62.334	1600275
133	6.8	1282.4	0.001344694	0.007452009	64.239	1344694
134	7	1284.3	0.001125962	0.006107315	66.116	1125962
135	7.2	1286.2	0.000936827	0.004981353	67.998	936827
136	7.4	1288.1	0.000774794	0.004044526	69.894	774794
137	7.6	1289.9	0.000639605	0.003269732	71.77	639605
138	7.8	1291.8	0.000523026	0.002630127	73.642	523026
139	8	1293.7	0.000428081	0.002107101	75.54	428081
140	8.2	1295.6	0.000346288	0.00167902	77.421	346288
141	8.4	1297.5	0.000279523	0.001332732	79.338	279523
142	8.6	1299.3	0.000223953	0.001053209	81.172	223953
143	8.8	1301.3	0.000179507	0.000829256	83.121	179507
144	9	1303.2	0.000143258	0.000649749	84.991	143258
145	9.2	1305.1	0.000113794	0.000506491	86.897	113794
146	9.4	1306.9	8.9663e-05	0.000392697	88.758	89663
147	9.6	1308.8	7.0233e-05	0.000303034	90.594	70233
148	9.8	1310.7	5.5129e-05	0.000232801	92.523	55129
149	10	1312.5	4.2393e-05	0.000177672	94.384	42393
150	10.2	1314.5	3.2963e-05	0.000135279	96.316	32963
151	10.4	1316.2	2.529e-05	0.000102316	98.083	25290
152	10.6	1318.2	1.9246e-05	7.7026e-05	100	19246
153	10.8	1320.1	1.4621e-05	5.778e-05	101.9	14621
154	11	1321.9	1.1175e-05	4.3159e-05	103.76	11175
155	11.2	1323.9	8.407e-06	3.1984e-05	105.71	8407
156	11.4	1325.6	6.22e-06	2.3577e-05	107.42	6220
157	11.6	1327.4	4.673e-06	1.7357e-05	109.24	4673
158	11.8	1329.4	3.481e-06	1.2684e-05	111.19	3481
159	12	1331.5	2.456e-06	9.203e-06	113.36	2456
160	12.2	1333.1	1.897e-06	6.747e-06	114.99	1897
161	12.4	1335.1	1.4e-06	4.85e-06	116.96	1400
162	12.6	1337.2	9.5e-07	3.45e-06	119.05	950
163	12.8	1339.1	7.65e-07	2.5e-06	120.93	765
164	13	1341.1	4.89e-07	1.735e-06	122.9	489
165	13.2	1343.4	3.59e-07	1.246e-06	125.24	359
166	13.4	1343.8	2.58e-07	8.87e-07	125.67	258
167	13.6	1347	1.9e-07	6.29e-07	128.88	190
168	13.8	1347.7	1.29e-07	4.39e-07	129.58	129
169	14	1348	8.8e-08	3.1e-07	129.87	88
170	14.2	1352.7	7.2e-08	2.22e-07	134.52	72
171	14.4	1352.4	4.4e-08	1.5e-07	134.23	44
172	14.6	1354.2	2.6e-08	1.06e-07	136.03	26
173	14.8	1356.1	3.4e-08	8e-08	137.99	34
174	15	1358.8	1.3e-08	4.6e-08	140.69	13
175	15.2	1363	9e-09	3.3e-08	144.84	9
176	15.4	1371.8	9e-09	2.4e-08	153.62	9
177	15.6	1362	6e-09	1.5e-08	143.84	6
178	15.8	1363	1e-09	9e-09	144.84	1
179	16	1369.7	3e-09	8e-09	151.51	3
180	16.2	1368.3	4e-09	5e-09	150.09	4
181	16.4	0	0	1e-09	0	0
182	16.6	0	0	1e-09	0	0
183	16.8	0	0	1e-09	0	0
184	17	1382	1e-09	1e-09	163.84	1
185	17.2	0	0	0	0	0
186	17.4	0	0	0	0	0
187	17.6	0	0	0	0	0
188	17.8	0	0	0	0	0
189	18	0	0	0	0	0
190	18.2	0	0	0	0	0
191	18.4	0	0	0	0	0
192	18.6	0	0	0	0	0
193	18.8	0	0	0	0	0
194	19	0	0	0	0	0
195	19.2	0	0	0	0	0
196	19.4	0	0	0	0	0
197	19.6	0	0	0	0	0
198	19.8	0	0	0	0	0
199	20	0	0	0	0	0
