# Supplementary material for: Quantifying the Potential for Future Gene Therapy to Lower Lifetime Risk of Polygenic Late-Onset Diseases
Source: MDPI journal article supplement (doi:10.3390/ijms20133352), 2019-07-08
Supplement: s2 [file s2 › SuppFiles/Results/LODsCommonLow/T2D/1.000/FrailtyAnalysis.csv]

Age	Heritability	MeanOR	CaseOR	nControls	nCases	nCumIncidence	nIncidence	nLifeIncidence0	nAbsIncidence0	nLifeIncidence5	nAbsIncidence5	nLifeIncidence10	nAbsIncidence10	nLifeIncidence15	nAbsIncidence15	nIncActDivExp
19	0.701524	0.999844	1208.77	999981814	18186	1.8186e-05	1.8186e-05	1.80199e-05	1.80199e-05	1.8047e-05	1.8047e-05	1.80559e-05	1.80559e-05	1.80689e-05	1.80689e-05	0.997244
20	0.701477	0.999576	950.982	999942653	39161	5.7347e-05	3.91617e-05	5.68028e-05	3.87829e-05	5.69021e-05	3.88552e-05	5.69326e-05	3.88767e-05	5.69704e-05	3.89016e-05	0.997823
21	0.701405	0.999153	793.513	999879353	63300	0.000120647	6.33036e-05	0.000119453	6.26505e-05	0.000119694	6.27914e-05	0.000119768	6.28351e-05	0.000119841	6.28708e-05	0.997947
22	0.701307	0.998559	687.09	999788328	91025	0.000211672	9.1036e-05	0.000209482	9.00283e-05	0.00020996	9.02668e-05	0.000210115	9.03478e-05	0.000210237	9.03956e-05	0.997448
23	0.70118	0.997774	612.261	999665862	122466	0.000334138	0.000122492	0.000330513	0.000121031	0.000331361	0.000121401	0.000331659	0.000121544	0.000331841	0.000121604	0.993504
24	0.701021	0.99677	542.287	999506078	159784	0.000493922	0.000159837	0.000488291	0.000157778	0.000489686	0.000158324	0.000490222	0.000158562	0.000490481	0.000158641	0.998217
25	0.700828	0.995522	485.231	999303718	202360	0.000696282	0.00020246	0.000687932	0.000199641	0.000690092	0.000200406	0.000691001	0.00020078	0.000691372	0.000200891	0.999985
26	0.700599	0.994007	437.205	999053641	250077	0.000946359	0.000250251	0.000934424	0.000246492	0.000937603	0.000247511	0.000939069	0.000248068	0.000939612	0.00024824	0.99656
27	0.700328	0.992185	393.584	998747322	306319	0.00125268	0.000306609	0.00123607	0.000301646	0.00124057	0.000302965	0.00124284	0.000303767	0.00124365	0.00030404	0.99876
28	0.700011	0.990018	359.44	998376940	370382	0.00162306	0.000370847	0.00160045	0.00036438	0.00160661	0.000366043	0.00161	0.000367162	0.00161125	0.000367593	0.999264
29	0.699646	0.987474	327.165	997934217	442723	0.00206578	0.000443443	0.00203557	0.000435121	0.00204378	0.000437165	0.00204868	0.000438679	0.00205058	0.000439338	0.997235
30	0.699226	0.9845	296.169	997406785	527432	0.00259321	0.000528524	0.00255342	0.000517851	0.00256412	0.000520346	0.00257102	0.00052234	0.0025739	0.000523313	0.99917
31	0.698746	0.981047	269.323	996782560	624225	0.00321744	0.000625848	0.00316567	0.000612243	0.0031794	0.000615277	0.00318884	0.00061782	0.00319311	0.000619209	1.0006
32	0.698201	0.977071	245.468	996050222	732338	0.00394978	0.000734702	0.00388317	0.000717501	0.00390056	0.000721166	0.00391316	0.000724319	0.00391934	0.000726238	0.998444
33	0.697586	0.972507	223.113	995192232	857990	0.00480777	0.000861392	0.00472283	0.000839668	0.00474465	0.000844086	0.00476109	0.000847939	0.00476987	0.00085053	0.999375
34	0.696891	0.967292	202.459	994190844	1001388	0.00580916	0.00100623	0.0057017	0.000978867	0.00572884	0.000984194	0.00574991	0.000988816	0.00576211	0.00099224	1.00047
35	0.696113	0.961369	184.204	993028824	1162020	0.00697118	0.00116881	0.00683621	0.00113451	0.00686976	0.00114091	0.00689632	0.00114641	0.00691291	0.0011508	0.999356
36	0.695242	0.954659	167.489	991682788	1346036	0.00831721	0.00135549	0.00814872	0.00131251	0.00818996	0.0013202	0.00822306	0.00132674	0.00824514	0.00133223	0.999778
37	0.694269	0.947088	152.748	990129489	1553299	0.00987051	0.00156633	0.00966134	0.00151262	0.00971178	0.00152183	0.00975266	0.0015296	0.00978143	0.00153629	0.999534
38	0.693187	0.938593	138.759	988343961	1785528	0.011656	0.00180333	0.0113977	0.00173635	0.0114592	0.0017474	0.0115093	0.00175659	0.011546	0.00176461	0.998417
39	0.691983	0.929075	126.324	986293149	2050812	0.0137069	0.002075	0.0133891	0.0019914	0.0134639	0.00200469	0.0135249	0.0020156	0.0135711	0.00202506	0.999453
40	0.69065	0.918476	114.666	983948937	2344212	0.0160511	0.00237679	0.0156619	0.00227278	0.0157526	0.00228871	0.0158265	0.00230163	0.0158838	0.00231272	0.998666
41	0.689177	0.906712	103.894	981273611	2675326	0.0187264	0.00271897	0.0182515	0.0025896	0.0183613	0.0026087	0.0184505	0.00262397	0.0185208	0.00263698	0.999333
42	0.687552	0.893708	94.2809	978230882	3042729	0.0217691	0.0031008	0.0211916	0.00294014	0.0213243	0.00296304	0.0214315	0.00298108	0.0215171	0.00299631	0.999722
43	0.685767	0.879416	85.2141	974782897	3447985	0.0252171	0.00352471	0.0245172	0.00332558	0.0246773	0.00335301	0.0248059	0.00337435	0.0249092	0.00339211	0.999775
44	0.683809	0.863786	77.0338	970890155	3892742	0.0291098	0.00399345	0.0282643	0.00374711	0.0284573	0.00377997	0.0286111	0.00380519	0.0287351	0.0038259	0.999615
45	0.681666	0.846781	69.6687	966512992	4377163	0.033487	0.0045084	0.0324687	0.00420435	0.0327011	0.00424379	0.0328846	0.00427353	0.0330328	0.00429765	0.999135
46	0.67933	0.828381	62.8427	961607813	4905179	0.0383922	0.00507513	0.0371691	0.00470049	0.0374491	0.00474799	0.0376676	0.00478302	0.0378438	0.00481102	0.999218
47	0.676786	0.808574	56.6349	956131124	5476689	0.0438689	0.00569535	0.0424039	0.00523476	0.0427411	0.00529204	0.0430009	0.00533325	0.0432095	0.00536573	0.999843
48	0.674028	0.787417	51.0282	950053648	6077476	0.0499464	0.00635632	0.0481967	0.00579281	0.0486029	0.00586173	0.048911	0.00591007	0.0491572	0.00594769	0.998851
49	0.671043	0.76493	45.9051	943330832	6722816	0.0566692	0.00707625	0.054585	0.00638829	0.0550742	0.00647132	0.055439	0.00652806	0.0557288	0.00657162	0.99946
50	0.667827	0.741218	41.1548	935935788	7395044	0.0640642	0.00783929	0.0615884	0.0070034	0.0621773	0.00710309	0.0626087	0.00716972	0.0629488	0.00721997	0.999511
51	0.66437	0.716374	36.9304	927842342	8093446	0.0721577	0.00864744	0.0692248	0.00763645	0.069933	0.00775571	0.0704428	0.00783409	0.0708407	0.00789188	0.999818
52	0.660676	0.690561	32.9869	919035654	8806688	0.0809643	0.00949158	0.0775004	0.00827551	0.0783506	0.00841765	0.0789526	0.00850977	0.0794167	0.00857604	0.999891
53	0.65674	0.663951	29.4845	909515325	9520329	0.0904847	0.010359	0.0864065	0.00890617	0.087425	0.0090744	0.088135	0.00918236	0.0886748	0.00925809	0.999182
54	0.652563	0.636716	26.3061	899278338	10236987	0.100722	0.0112554	0.0959365	0.00952992	0.0971526	0.00972759	0.097989	0.00985402	0.0986152	0.00994042	0.999044
55	0.648152	0.609046	23.414	888329193	10949145	0.111671	0.0121755	0.106075	0.0101387	0.107522	0.0103693	0.108506	0.0105169	0.109231	0.0106155	0.999611
56	0.643515	0.58117	20.8228	876700150	11629043	0.1233	0.0130909	0.116781	0.0107062	0.118494	0.0109724	0.11965	0.0111438	0.120487	0.0112564	0.999267
57	0.638674	0.553314	18.4516	864421319	12278831	0.135579	0.0140057	0.128015	0.0112338	0.130033	0.0115382	0.131386	0.0117364	0.132352	0.0118649	0.99914
58	0.63364	0.525658	16.3203	851519848	12901471	0.14848	0.014925	0.139739	0.0117234	0.142102	0.0120692	0.143683	0.0122972	0.144795	0.0124435	1.00014
59	0.628441	0.498432	14.4178	838060326	13459522	0.16194	0.0158065	0.15188	0.0121411	0.154632	0.0125299	0.156473	0.0127898	0.157751	0.012956	0.999962
60	0.623107	0.471822	12.7158	824101800	13958526	0.175898	0.0166558	0.164372	0.0124927	0.167557	0.0129254	0.169692	0.0132193	0.171159	0.0134074	0.999596
61	0.617658	0.445958	11.2177	809695501	14406299	0.190304	0.0174812	0.177158	0.0127857	0.18082	0.0132631	0.183285	0.0135928	0.184964	0.0138051	0.999938
62	0.612132	0.420989	9.88	794911807	14783694	0.205088	0.0182583	0.190161	0.0130032	0.194346	0.0135255	0.197177	0.013892	0.199095	0.0141306	0.999858
63	0.606564	0.397032	8.69053	779819358	15092449	0.220181	0.0189863	0.203309	0.0131472	0.20806	0.0137144	0.211296	0.0141188	0.21348	0.0143855	0.999589
64	0.600982	0.374157	7.65246	764486692	15332666	0.235513	0.0196618	0.216527	0.0132189	0.221891	0.0138308	0.22557	0.0142736	0.22805	0.0145697	0.999128
65	0.595415	0.352405	6.73819	748969564	15517128	0.25103	0.0202974	0.229758	0.0132304	0.235778	0.0138877	0.239938	0.0143686	0.242745	0.0146953	0.999192
66	0.589883	0.331788	5.94525	733323494	15646070	0.266677	0.0208901	0.242941	0.0131829	0.249664	0.013886	0.254343	0.0144045	0.257508	0.0147626	0.999608
67	0.58441	0.312315	5.25185	717608282	15715212	0.282392	0.0214301	0.256014	0.0130729	0.263487	0.0138226	0.26872	0.0143777	0.272275	0.0147673	0.99987
68	0.579006	0.293967	4.65269	701876367	15731915	0.298124	0.0219227	0.268921	0.0129073	0.277191	0.0137042	0.283016	0.0142954	0.286992	0.014717	1.00017
69	0.573688	0.276728	4.1303	686184123	15692244	0.313816	0.0223576	0.281604	0.0126834	0.29072	0.0135289	0.297171	0.0141551	0.301601	0.0146084	0.999952
70	0.568464	0.260552	3.67558	670567879	15616244	0.329432	0.0227581	0.294023	0.0124182	0.304035	0.013315	0.311147	0.0139764	0.316061	0.0144604	1.00017
71	0.563338	0.245394	3.28195	655069871	15498008	0.34493	0.0231118	0.30613	0.0121074	0.317093	0.0130582	0.324902	0.0137546	0.330329	0.0142682	1.00012
72	0.558313	0.231204	2.93868	639722411	15347460	0.360278	0.0234287	0.317889	0.0117588	0.32986	0.012767	0.338401	0.0134991	0.34437	0.0140412	1.00014
73	0.553394	0.217925	2.63603	624544119	15178292	0.375456	0.0237264	0.329272	0.0113833	0.342313	0.0124531	0.351623	0.013222	0.358163	0.0137924	1.00082
74	0.548586	0.205519	2.37261	609579337	14964782	0.390421	0.0239611	0.340236	0.0109633	0.354409	0.0120954	0.364525	0.0129017	0.371662	0.0134989	1.00019
75	0.543884	0.193919	2.14186	594835495	14743842	0.405165	0.0241869	0.350764	0.0105281	0.366133	0.0117245	0.377096	0.0125711	0.384857	0.0131956	1.0004
76	0.539284	0.183074	1.93844	580328349	14507146	0.419672	0.0243885	0.360837	0.0100729	0.377466	0.0113333	0.389319	0.0122233	0.397732	0.0128752	1.00068
77	0.534795	0.172941	1.7583	566080384	14247965	0.43392	0.0245516	0.370429	0.00959294	0.388383	0.0109164	0.401171	0.0118524	0.410264	0.012532	1.00033
78	0.530404	0.163464	1.59995	552093566	13986818	0.447906	0.0247082	0.379532	0.00910227	0.398873	0.0104898	0.412647	0.0114756	0.422449	0.0121841	1.00057
79	0.526123	0.154608	1.45763	538388047	13705519	0.461612	0.0248246	0.388122	0.00859007	0.408913	0.0100407	0.423725	0.0110776	0.434265	0.0118161	0.999941
80	0.521935	0.146317	1.33189	524951858	13436189	0.475048	0.0249563	0.3962	0.00807824	0.418508	0.00959431	0.434409	0.0106846	0.445721	0.0114562	1.00058
81	0.517847	0.13856	1.2195	511804231	13147627	0.488196	0.0250454	0.403749	0.00754904	0.427637	0.00912892	0.44468	0.0102713	0.456799	0.0110778	1.0001
82	0.51385	0.131295	1.11902	498940515	12863716	0.501059	0.0251341	0.410766	0.00701709	0.436298	0.00866095	0.454536	0.00985586	0.467499	0.0107009	1.00011
83	0.50994	0.124484	1.02897	486357887	12582628	0.513642	0.0252187	0.417248	0.00648226	0.444486	0.00818846	0.463973	0.00943666	0.477823	0.0103235	1.0004
84	0.506124	0.118101	0.947511	474062543	12295344	0.525937	0.0252804	0.423192	0.0059432	0.452192	0.00770623	0.472981	0.00900763	0.487761	0.00993783	1.00018
85	0.502398	0.112115	0.873463	462051155	12011388	0.537949	0.0253371	0.4286	0.00540879	0.459414	0.00722161	0.481558	0.00857691	0.497312	0.00955158	1.0001
86	0.498752	0.106495	0.807422	450321697	11729458	0.549678	0.0253856	0.433482	0.00488168	0.466149	0.00673476	0.489702	0.00814423	0.506476	0.00916335	1
87	0.495181	0.101213	0.748019	438868594	11453103	0.561131	0.0254332	0.437848	0.00436632	0.472396	0.00624761	0.497413	0.0077112	0.515251	0.00877508	1.00012
88	0.491689	0.0962464	0.693112	427683720	11184874	0.572316	0.0254857	0.441715	0.00386628	0.478158	0.00576217	0.504692	0.00727884	0.523639	0.00838838	1.00066
89	0.488269	0.0915726	0.643622	416765846	10917874	0.583234	0.0255279	0.445097	0.0033823	0.483436	0.00527737	0.511535	0.00684289	0.531638	0.00799849	1.001
90	0.484922	0.087175	0.598765	406121537	10644309	0.593878	0.0255403	0.448014	0.00291659	0.488229	0.00479319	0.517934	0.00639968	0.539238	0.00760073	1.00034
91	0.481645	0.0830311	0.557472	395734534	10387003	0.604265	0.0255761	0.450494	0.00248026	0.492552	0.00432297	0.523898	0.00596396	0.54645	0.00721211	1.00074
92	0.478438	0.0791276	0.519502	385608045	10126489	0.614392	0.0255891	0.452567	0.00207284	0.496412	0.00386057	0.529422	0.00552395	0.553268	0.00681801	1.00039
93	0.475294	0.0754448	0.485066	375731935	9876110	0.624268	0.0256118	0.454269	0.00170185	0.499826	0.00341387	0.53451	0.00508792	0.559696	0.00642713	1.00053
94	0.47221	0.0719689	0.453499	366104298	9627637	0.633896	0.0256237	0.455638	0.00136915	0.502809	0.00298259	0.539164	0.00465371	0.56573	0.00603422	1.00034
95	0.469189	0.0686878	0.424393	356723435	9380863	0.643277	0.0256235	0.456715	0.00107753	0.505379	0.0025704	0.543388	0.00422425	0.57137	0.00564006	0.999767
96	0.466225	0.0655857	0.397482	347573751	9149684	0.652426	0.0256492	0.457545	0.000829327	0.507564	0.00218481	0.547196	0.00380801	0.576623	0.00525352	1.00028
97	0.463317	0.0626512	0.372708	338651772	8921979	0.661348	0.0256693	0.458168	0.000623111	0.50939	0.00182628	0.550598	0.00340137	0.58149	0.00486689	1.00064
98	0.460462	0.0598759	0.350025	329961827	8689945	0.670038	0.0256604	0.458624	0.00045657	0.510888	0.00149745	0.553601	0.00300385	0.585967	0.00447684	0.999925
99	0.457657	0.0572469	0.328905	321487970	8473857	0.678512	0.0256813	0.458951	0.000327049	0.512093	0.00120507	0.556227	0.00262516	0.590063	0.00409601	1.00042
100	0.454911	0.0547581	0.30906	313231260	8256710	0.686769	0.0256828	0.45918	0.000228835	0.513041	0.000948407	0.558489	0.00226238	0.593781	0.00371804	1.0002
101	0.452212	0.0523987	0.291011	305184383	8046877	0.694816	0.0256899	0.459337	0.000156673	0.513771	0.000729369	0.56041	0.00192147	0.59713	0.00334903	1.00024
102	0.449561	0.0501616	0.274207	297345221	7839162	0.702655	0.0256866	0.459442	0.00010477	0.514318	0.000547487	0.562015	0.00160464	0.600119	0.00298856	0.999901
103	0.446952	0.0480378	0.258586	289703139	7642082	0.710297	0.025701	0.45951	6.83202e-05	0.51472	0.000401515	0.563332	0.00131688	0.60276	0.00264164	1.00028
104	0.444391	0.0460225	0.24404	282260526	7442613	0.717739	0.0256905	0.459553	4.32788e-05	0.515007	0.000287248	0.56439	0.00105841	0.605066	0.00230568	0.999713
105	0.441875	0.0441081	0.230399	275006292	7254234	0.724994	0.0257005	0.45958	2.6623e-05	0.515208	0.000201051	0.565224	0.000833258	0.607054	0.0019877	0.999966
106	0.439401	0.0422891	0.217745	267939091	7067201	0.732061	0.0256983	0.459596	1.58305e-05	0.515346	0.000137598	0.565864	0.000640571	0.608741	0.00168754	0.999764
107	0.436968	0.0405596	0.205949	261053487	6885604	0.738947	0.0256984	0.459605	9.05457e-06	0.515438	9.20261e-05	0.566345	0.000480891	0.610151	0.00140945	0.999664
108	0.434571	0.0389133	0.194992	254341599	6711888	0.745658	0.0257108	0.45961	5.00036e-06	0.515498	6.00043e-05	0.566698	0.000352643	0.611307	0.00115659	1.00006
109	0.432219	0.0373474	0.184605	247803998	6537601	0.752196	0.025704	0.459612	2.61504e-06	0.515536	3.80161e-05	0.56695	0.000252319	0.612237	0.000929712	0.999717
110	0.429904	0.0358564	0.174898	241433020	6370978	0.758567	0.0257097	0.459614	1.30605e-06	0.515559	2.33815e-05	0.567127	0.000176572	0.612969	0.000731802	0.999873
111	0.427617	0.0344346	0.16606	235224284	6208736	0.764776	0.0257162	0.459614	6.20874e-07	0.515573	1.39076e-05	0.567247	0.000120884	0.613532	0.00056276	1.00007
112	0.425369	0.0330797	0.15749	229172948	6051336	0.770827	0.0257258	0.459614	2.7231e-07	0.515581	7.95751e-06	0.567328	8.08761e-05	0.613954	0.000422625	1.00039
113	0.423159	0.0317886	0.149466	223279062	5893886	0.776721	0.0257181	0.459615	1.17878e-07	0.515585	4.39095e-06	0.567381	5.26913e-05	0.614264	0.000309665	1.00005
114	0.42098	0.0305565	0.142004	217533631	5745431	0.782466	0.0257321	0.459615	2.87272e-08	0.515588	2.29817e-06	0.567414	3.34097e-05	0.614486	0.000221745	1.00055
115	0.418829	0.0293808	0.135061	211938242	5595389	0.788062	0.0257219	0.459615	0	0.515589	1.14705e-06	0.567435	2.05351e-05	0.614641	0.000155076	1.00013
116	0.416713	0.0282594	0.128421	206490249	5447993	0.79351	0.0257056	0.459615	0	0.515589	5.44799e-07	0.567447	1.22035e-05	0.614747	0.000106072	0.99946
117	0.414628	0.0271875	0.122235	201178649	5311600	0.798821	0.0257232	0.459615	0	0.51559	2.39022e-07	0.567454	6.98475e-06	0.614818	7.09895e-05	1.00012
118	0.412578	0.026164	0.116226	196001405	5177244	0.803999	0.0257346	0.459615	0	0.51559	1.03545e-07	0.567458	3.85705e-06	0.614864	4.62846e-05	1.00054
119	0.41055	0.0251855	0.110848	190960024	5041381	0.80904	0.0257211	0.459615	0	0.51559	2.52069e-08	0.56746	2.01655e-06	0.614893	2.93156e-05	1
120	0.408549	0.0242495	0.105616	186044715	4915309	0.813955	0.02574	0.459615	0	0.51559	0	0.567461	1.00764e-06	0.614911	1.80392e-05	1.00072
