# Supplementary material for: Quantifying the Potential for Future Gene Therapy to Lower Lifetime Risk of Polygenic Late-Onset Diseases
Source: MDPI journal article supplement (doi:10.3390/ijms20133352), 2019-07-08
Supplement: s2 [file s2 › SuppFiles/Results/LODsCommonLow/T2D/1.000/IndividualsByBetaDistrib.csv]

nEntry	Beta	nDetrimentalCount	nFractionPopulation	nCumulativeFractionPopulation	nEditsNeeded	nIndividuals
0	-19.8	0	0	1	0	0
1	-19.6	0	0	1	0	0
2	-19.4	0	0	1	0	0
3	-19.2	0	0	1	0	0
4	-19	0	0	1	0	0
5	-18.8	0	0	1	0	0
6	-18.6	0	0	1	0	0
7	-18.4	0	0	1	0	0
8	-18.2	0	0	1	0	0
9	-18	0	0	1	0	0
10	-17.8	0	0	1	0	0
11	-17.6	1056	1e-09	1	0	1
12	-17.4	0	0	1	0	0
13	-17.2	0	0	1	0	0
14	-17	0	0	1	0	0
15	-16.8	0	0	1	0	0
16	-16.6	0	0	1	0	0
17	-16.4	0	0	1	0	0
18	-16.2	0	0	1	0	0
19	-16	1060	1e-09	1	0	1
20	-15.8	1066.5	2e-09	1	0	2
21	-15.6	1072.5	2e-09	1	0	2
22	-15.4	1068.4	5e-09	0.99999999	0	5
23	-15.2	1071.5	6e-09	0.99999999	0	6
24	-15	1075.9	1.1e-08	0.99999998	0	11
25	-14.8	1078.1	2.4e-08	0.99999997	0	24
26	-14.6	1076.6	2.7e-08	0.99999995	0	27
27	-14.4	1079	4.2e-08	0.99999992	0	42
28	-14.2	1083	6.8e-08	0.99999988	0	68
29	-14	1083.9	7.9e-08	0.99999981	0	79
30	-13.8	1086.5	1.16e-07	0.99999973	0	116
31	-13.6	1089.2	1.58e-07	0.99999962	0	158
32	-13.4	1091.3	2.46e-07	0.99999946	0	246
33	-13.2	1092.8	4.1e-07	0.99999921	0	410
34	-13	1095.5	4.96e-07	0.9999988	0	496
35	-12.8	1097.4	6.39e-07	0.99999831	0	639
36	-12.6	1099	9.95e-07	0.99999767	0	995
37	-12.4	1100.4	1.395e-06	0.99999667	0	1395
38	-12.2	1102.6	1.861e-06	0.99999528	0	1861
39	-12	1104.6	2.612e-06	0.99999342	0	2612
40	-11.8	1106.4	3.582e-06	0.9999908	0	3582
41	-11.6	1108.3	4.767e-06	0.99998722	0	4767
42	-11.4	1110.1	6.356e-06	0.99998246	0	6356
43	-11.2	1112	9.029e-06	0.9999761	0	9029
44	-11	1113.9	1.1925e-05	0.99996707	0	11925
45	-10.8	1116	1.5758e-05	0.99995515	0	15758
46	-10.6	1117.7	2.0914e-05	0.99993939	0	20914
47	-10.4	1119.7	2.7624e-05	0.99991847	0	27624
48	-10.2	1121.5	3.5758e-05	0.99989085	0	35758
49	-10	1123.4	4.7388e-05	0.99985509	0	47388
50	-9.8	1125.3	6.1276e-05	0.9998077	0	61276
51	-9.6	1127.2	7.8379e-05	0.99974643	0	78379
52	-9.4	1129.1	0.000100104	0.99966805	0	100104
53	-9.2	1131	0.000128535	0.99956794	0	128535
54	-9	1132.9	0.000162849	0.99943941	0	162849
55	-8.8	1134.8	0.000204314	0.99927656	0	204314
56	-8.6	1136.7	0.000257091	0.99907225	0	257091
57	-8.4	1138.6	0.000321763	0.99881515	0	321763
58	-8.2	1140.5	0.000397777	0.99849339	0	397777
59	-8	1142.4	0.000491466	0.99809561	0	491466
60	-7.8	1144.3	0.000603258	0.99760415	0	603258
61	-7.6	1146.2	0.000736819	0.99700089	0	736819
62	-7.4	1148.1	0.000894552	0.99626407	0	894552
63	-7.2	1150	0.001081826	0.99536952	0	1081826
64	-7	1151.9	0.001298126	0.99428769	0	1298126
65	-6.8	1153.8	0.001552679	0.99298957	0	1552679
66	-6.6	1155.7	0.001846247	0.99143689	0	1846247
67	-6.4	1157.6	0.002185082	0.98959064	0	2185082
68	-6.2	1159.5	0.00256641	0.98740556	0	2566410
69	-6	1161.4	0.003002675	0.98483915	0	3002675
70	-5.8	1163.3	0.003492484	0.98183648	0	3492484
71	-5.6	1165.2	0.004044082	0.97834399	0	4044082
72	-5.4	1167.1	0.0046574	0.97429991	0	4657400
73	-5.2	1168.9	0.005332774	0.96964251	0	5332774
74	-5	1170.8	0.006076257	0.96430973	0	6076257
75	-4.8	1172.7	0.006888099	0.95823348	0	6888099
76	-4.6	1174.6	0.007760944	0.95134538	0	7760944
77	-4.4	1176.5	0.008701137	0.94358443	0	8701137
78	-4.2	1178.4	0.009711024	0.9348833	0	9711024
79	-4	1180.3	0.010771075	0.92517227	0	10771075
80	-3.8	1182.2	0.011886194	0.9144012	0	11886194
81	-3.6	1184.1	0.013049376	0.90251501	0	13049376
82	-3.4	1186	0.014256098	0.88946563	0	14256098
83	-3.2	1187.9	0.015488299	0.87520953	0	15488299
84	-3	1189.8	0.016739525	0.85972123	0	16739525
85	-2.8	1191.7	0.017984695	0.84298171	0	17984695
86	-2.6	1193.6	0.019231433	0.82499701	0	19231433
87	-2.4	1195.5	0.020461951	0.80576558	0	20461951
88	-2.2	1197.3	0.021652224	0.78530363	0	21652224
89	-2	1199.2	0.022797872	0.7636514	0	22797872
90	-1.8	1201.1	0.023880739	0.74085353	0	23880739
91	-1.6	1203	0.024890133	0.71697279	0	24890133
92	-1.4	1204.9	0.025791542	0.69208266	0	25791542
93	-1.2	1206.8	0.026602409	0.66629112	0	26602409
94	-1	1208.7	0.027277322	0.63968871	0	27277322
95	-0.8	1210.6	0.027840285	0.61241139	0	27840285
96	-0.6	1212.5	0.0282529	0.5845711	0	28252900
97	-0.4	1214.4	0.028532638	0.5563182	0	28532638
98	-0.2	1216.3	0.028671734	0.52778556	0	28671734
99	0	1218.2	0.028660818	0.49911383	0	28660818
100	0.2	1220	0.028500343	0.47045301	1.8904	28500343
101	0.4	1221.9	0.028186156	0.44195267	3.7825	28186156
102	0.6	1223.8	0.027746716	0.41376651	5.6717	27746716
103	0.8	1225.7	0.027164283	0.3860198	7.5636	27164283
104	1	1227.6	0.026470694	0.35885551	9.4579	26470694
105	1.2	1229.5	0.025629277	0.33238482	11.344	25629277
106	1.4	1231.4	0.02472918	0.30675554	13.236	24729180
107	1.6	1233.3	0.023720107	0.28202636	15.127	23720107
108	1.8	1235.2	0.022629737	0.25830626	17.017	22629737
109	2	1237.1	0.021473353	0.23567652	18.905	21473353
110	2.2	1239	0.020288981	0.21420317	20.793	20288981
111	2.4	1240.8	0.019068943	0.19391418	22.686	19068943
112	2.6	1242.7	0.017829907	0.17484524	24.573	17829907
113	2.8	1244.6	0.016582128	0.15701534	26.464	16582128
114	3	1246.5	0.015350272	0.14043321	28.353	15350272
115	3.2	1248.4	0.014127262	0.12508294	30.242	14127262
116	3.4	1250.3	0.01294931	0.11095567	32.129	12949310
117	3.6	1252.2	0.01180193	0.098006363	34.021	11801930
118	3.8	1254.1	0.010699142	0.086204433	35.909	10699142
119	4	1256	0.009658183	0.075505291	37.801	9658183
120	4.2	1257.8	0.008668824	0.065847108	39.692	8668824
121	4.4	1259.7	0.00773897	0.057178284	41.576	7738970
122	4.6	1261.6	0.006881884	0.049439314	43.46	6881884
123	4.8	1263.5	0.00608327	0.04255743	45.358	6083270
124	5	1265.4	0.005348086	0.03647416	47.242	5348086
125	5.2	1267.3	0.004681068	0.031126074	49.131	4681068
126	5.4	1269.2	0.00407431	0.026445006	51.017	4074310
127	5.6	1271.1	0.00353044	0.022370696	52.903	3530440
128	5.8	1273	0.003047699	0.018840256	54.793	3047699
129	6	1274.8	0.002612722	0.015792557	56.674	2612722
130	6.2	1276.7	0.00223032	0.013179835	58.571	2230320
131	6.4	1278.6	0.001893933	0.010949515	60.446	1893933
132	6.6	1280.5	0.001601035	0.009055582	62.338	1601035
133	6.8	1282.4	0.001344396	0.007454547	64.223	1344396
134	7	1284.3	0.001125477	0.006110151	66.107	1125477
135	7.2	1286.2	0.000935617	0.004984674	68.008	935617
136	7.4	1288	0.000777208	0.004049057	69.883	777208
137	7.6	1289.9	0.000639043	0.003271849	71.768	639043
138	7.8	1291.8	0.000523671	0.002632806	73.66	523671
139	8	1293.7	0.000427358	0.002109135	75.547	427358
140	8.2	1295.6	0.000347288	0.001681777	77.442	347288
141	8.4	1297.5	0.000280682	0.001334489	79.314	280682
142	8.6	1299.3	0.00022498	0.001053807	81.172	224980
143	8.8	1301.2	0.000180235	0.000828827	83.08	180235
144	9	1303.1	0.000143373	0.000648592	84.96	143373
145	9.2	1305	0.000112603	0.000505219	86.848	112603
146	9.4	1306.9	8.9921e-05	0.000392616	88.742	89921
147	9.6	1308.8	7.0486e-05	0.000302695	90.65	70486
148	9.8	1310.7	5.5145e-05	0.000232209	92.509	55145
149	10	1312.6	4.2293e-05	0.000177064	94.448	42293
150	10.2	1314.5	3.277e-05	0.000134771	96.335	32770
151	10.4	1316.3	2.4981e-05	0.000102001	98.189	24981
152	10.6	1318.2	1.929e-05	7.702e-05	100.08	19290
153	10.8	1320	1.463e-05	5.773e-05	101.88	14630
154	11	1322	1.1154e-05	4.31e-05	103.8	11154
155	11.2	1323.8	8.203e-06	3.1946e-05	105.63	8203
156	11.4	1325.7	6.255e-06	2.3743e-05	107.58	6255
157	11.6	1327.5	4.684e-06	1.7488e-05	109.37	4684
158	11.8	1329.6	3.545e-06	1.2804e-05	111.45	3545
159	12	1331.4	2.487e-06	9.259e-06	113.2	2487
160	12.2	1333.5	1.807e-06	6.772e-06	115.36	1807
161	12.4	1335.4	1.415e-06	4.965e-06	117.22	1415
162	12.6	1336.8	1.029e-06	3.55e-06	118.62	1029
163	12.8	1338.8	7.27e-07	2.521e-06	120.6	727
164	13	1340.4	5.31e-07	1.794e-06	122.22	531
165	13.2	1342.1	3.18e-07	1.263e-06	123.98	318
166	13.4	1343.8	2.92e-07	9.45e-07	125.69	292
167	13.6	1347	2.19e-07	6.53e-07	128.86	219
168	13.8	1347.6	1.4e-07	4.34e-07	129.44	140
169	14	1351.1	8.7e-08	2.94e-07	132.96	87
170	14.2	1351.2	5.5e-08	2.07e-07	133.08	55
171	14.4	1353.9	4.2e-08	1.52e-07	135.7	42
172	14.6	1354.4	3.4e-08	1.1e-07	136.25	34
173	14.8	1357.5	2.7e-08	7.6e-08	139.36	27
174	15	1359.4	1.4e-08	4.9e-08	141.27	14
175	15.2	1364.7	1.2e-08	3.5e-08	146.51	12
176	15.4	1358.6	7e-09	2.3e-08	140.41	7
177	15.6	1386.5	2e-09	1.6e-08	168.34	2
178	15.8	1364	7e-09	1.4e-08	145.84	7
179	16	1378.7	3e-09	7e-09	160.51	3
180	16.2	0	0	4e-09	0	0
181	16.4	1383	1e-09	4e-09	164.84	1
182	16.6	0	0	3e-09	0	0
183	16.8	1376	1e-09	3e-09	157.84	1
184	17	1387	1e-09	2e-09	168.84	1
185	17.2	0	0	1e-09	0	0
186	17.4	1373	1e-09	1e-09	154.84	1
187	17.6	0	0	0	0	0
188	17.8	0	0	0	0	0
189	18	0	0	0	0	0
190	18.2	0	0	0	0	0
191	18.4	0	0	0	0	0
192	18.6	0	0	0	0	0
193	18.8	0	0	0	0	0
194	19	0	0	0	0	0
195	19.2	0	0	0	0	0
196	19.4	0	0	0	0	0
197	19.6	0	0	0	0	0
198	19.8	0	0	0	0	0
199	20	0	0	0	0	0
