# Supplementary material for: Quantifying the Potential for Future Gene Therapy to Lower Lifetime Risk of Polygenic Late-Onset Diseases
Source: MDPI journal article supplement (doi:10.3390/ijms20133352), 2019-07-08
Supplement: s2 [file s2 › SuppFiles/Results/LODsCommonLow/T2D/1.000/ScatterData.csv]

Age	OR	Beta
25	1508.2	7.3187
25	1412.3	7.253
25	2804.1	7.9389
26	53.406	3.9779
27	8711	9.0723
28	29.13	3.3718
28	204.15	5.3189
28	316.18	5.7563
28	1581.3	7.366
28	204.25	5.3194
28	36.068	3.5854
28	942.78	6.8488
29	14.586	2.6801
29	559.67	6.3273
29	1839.2	7.5171
29	391.61	5.9703
29	855.54	6.7517
29	278.53	5.6295
29	379.68	5.9393
30	1449.5	7.279
30	1722.3	7.4514
30	13.186	2.5791
30	1338.8	7.1996
30	2252.2	7.7197
31	1468.8	7.2922
31	133	4.8904
31	2750.2	7.9194
31	215.43	5.3726
31	290.13	5.6703
31	7825.1	8.9651
31	774.02	6.6516
31	4208.9	8.345
31	1.2785	0.24565
31	2416.7	7.7901
32	526.94	6.2671
32	34.346	3.5365
32	489.78	6.194
32	603.9	6.4034
32	3.1489	1.1471
32	1751.3	7.4681
32	62786	11.047
32	187.48	5.2337
33	824.42	6.7147
33	42.012	3.738
33	22.95	3.1333
33	1079.8	6.9845
33	855.25	6.7514
33	55.304	4.0129
33	3164.2	8.0597
33	134.33	4.9003
33	286.76	5.6587
33	405.16	6.0043
33	37.224	3.617
33	71.05	4.2634
33	1438.7	7.2715
33	173.52	5.1563
34	79.539	4.3762
34	97.571	4.5806
34	566.41	6.3393
34	432.61	6.0698
34	151.84	5.0228
34	265.52	5.5817
34	74.571	4.3117
34	7991.2	8.9861
34	42.246	3.7435
34	156.12	5.0506
34	342.18	5.8354
35	364.67	5.899
35	5.7391	1.7473
35	14.03	2.6412
35	350.23	5.8586
35	574.79	6.354
35	1412.7	7.2532
35	785.41	6.6662
35	175.1	5.1653
36	582.33	6.367
36	1386.8	7.2348
36	905.28	6.8082
36	50.784	3.9276
36	607.79	6.4098
36	240.29	5.4818
36	15.778	2.7586
36	5480.7	8.609
36	65.987	4.1895
36	118.88	4.7781
36	947.71	6.8541
36	23.349	3.1506
36	43.056	3.7625
36	77.306	4.3478
36	534.01	6.2804
36	104.65	4.6506
37	2961.2	7.9933
37	11.153	2.4117
37	321.85	5.7741
37	332.71	5.8073
37	1320.1	7.1855
37	43.531	3.7735
37	104.42	4.6484
37	159.64	5.0729
37	54.572	3.9995
37	223.35	5.4087
37	183.83	5.214
37	7089.5	8.8664
37	2327	7.7524
37	19.369	2.9637
37	49.641	3.9048
37	61.99	4.127
37	2.8504	1.0475
37	44.561	3.7969
37	474.37	6.162
37	3342.8	8.1146
37	148.29	4.9991
38	373.78	5.9237
38	76.967	4.3434
38	375.52	5.9283
38	859.31	6.7561
38	46.946	3.849
38	691.89	6.5394
38	92.184	4.5238
38	2684	7.8951
38	130.85	4.8741
38	2123.6	7.6609
38	4748.7	8.4656
38	2639.4	7.8783
38	811.92	6.6994
38	9.5557	2.2571
38	45.957	3.8277
38	11.225	2.4181
39	3499	8.1602
39	8.8494	2.1803
39	37.961	3.6366
39	50.671	3.9254
39	87.507	4.4717
39	126.09	4.837
39	170.8	5.1405
39	33.497	3.5115
39	438.91	6.0843
39	375.32	5.9278
39	182.96	5.2092
39	5.6892	1.7386
39	17.408	2.857
39	126.99	4.8441
39	12.287	2.5085
39	2378.9	7.7744
39	5285.2	8.5727
39	73.519	4.2975
39	64.421	4.1654
39	550.92	6.3116
39	14.235	2.6557
39	35.091	3.558
40	443.29	6.0942
40	49.003	3.8919
40	382.52	5.9468
40	243.04	5.4932
40	2489.6	7.8199
40	342.53	5.8364
40	229	5.4337
40	1.7555	0.56278
40	40.493	3.7011
40	48.945	3.8907
40	715.58	6.5731
40	15.821	2.7613
40	31.438	3.448
40	2.4614	0.90074
40	46.128	3.8314
40	753.79	6.6251
40	20.294	3.0103
40	722.82	6.5832
40	5883.3	8.6799
40	49.298	3.8979
40	2.2442	0.80835
40	149.81	5.0093
40	49.806	3.9081
40	567.62	6.3415
40	1031.8	6.939
41	219.19	5.3899
41	83.533	4.4252
41	244.27	5.4983
41	36.499	3.5973
41	16.642	2.812
41	28.971	3.3663
41	11.301	2.4249
41	919.92	6.8243
41	465.36	6.1428
41	1025.5	6.9329
41	74.014	4.3042
41	3.428	1.232
41	50.241	3.9168
41	75.528	4.3245
41	205.52	5.3255
41	1.4457	0.36857
41	133.38	4.8932
41	38.604	3.6534
41	10.855	2.3847
41	7.8842	2.0649
41	156.53	5.0533
42	24.18	3.1855
42	351.76	5.863
42	3.4421	1.2361
42	160.24	5.0767
42	447.7	6.1041
42	58.274	4.0652
42	30.128	3.4055
42	170.94	5.1413
42	191.67	5.2558
42	1196.3	7.087
42	2.5454	0.93429
42	68.984	4.2339
42	14.37	2.6652
42	187.98	5.2363
42	53.59	3.9814
42	952.06	6.8586
42	191.97	5.2574
42	42.117	3.7405
42	69.537	4.2419
42	158.16	5.0636
42	314.17	5.7499
42	207.2	5.3337
42	107.25	4.6751
42	82.778	4.4162
42	163.43	5.0964
42	79.927	4.3811
42	0.98935	-0.010704
42	216.51	5.3776
42	56.805	4.0396
42	47.362	3.8578
42	72.741	4.2869
42	688.3	6.5342
42	596.45	6.391
43	458.41	6.1278
43	300.37	5.705
43	25.135	3.2243
43	375.89	5.9293
43	18.457	2.9154
43	24.558	3.201
43	71.808	4.274
43	185	5.2204
43	3668.3	8.2075
43	895.39	6.7973
43	28.487	3.3494
43	600.69	6.3981
43	110.51	4.7051
43	92.288	4.5249
43	30.047	3.4028
43	250.22	5.5224
43	11.89	2.4757
43	22.872	3.1299
43	947.44	6.8538
43	1.9401	0.66274
43	207.43	5.3348
43	99.135	4.5965
43	387.94	5.9609
43	82.839	4.4169
43	14.433	2.6695
43	270.87	5.6016
43	55.965	4.0247
43	272.33	5.607
43	670.77	6.5084
43	31.048	3.4355
43	8.5804	2.1495
43	389.79	5.9656
43	78.787	4.3667
43	170.38	5.1381
43	1115.6	7.0171
43	293.19	5.6808
43	10.107	2.3132
43	389.61	5.9651
43	168.27	5.1256
43	56.63	4.0365
43	57.87	4.0582
43	598.91	6.3951
44	9.8414	2.2866
44	36.319	3.5923
44	303.02	5.7138
44	48.652	3.8847
44	840	6.7334
44	757.99	6.6307
44	184.19	5.216
44	396.2	5.9819
44	599.23	6.3956
44	142.01	4.9559
44	41.478	3.7252
44	18.726	2.9299
44	131.31	4.8776
44	23.892	3.1735
44	317.72	5.7612
44	75.534	4.3246
44	199.37	5.2952
44	83.211	4.4214
44	26.722	3.2855
44	4.6894	1.5453
44	80.924	4.3935
44	2.2487	0.81037
44	234.78	5.4587
44	20.256	3.0085
44	3.7078	1.3104
44	332.52	5.8067
44	42.363	3.7463
44	69.212	4.2372
44	12.598	2.5335
44	544.45	6.2998
44	409.84	6.0158
44	21.154	3.0518
44	71.142	4.2647
44	42646	10.661
44	118.4	4.7741
44	4374.8	8.3836
44	715.57	6.5731
44	178.23	5.1831
44	172.47	5.1502
44	16.143	2.7815
44	272.85	5.6089
44	59.104	4.0793
45	125.43	4.8318
45	150.59	5.0145
45	86.03	4.4547
45	8.5442	2.1453
45	12.39	2.5169
45	2.3523	0.85537
45	973.79	6.8812
45	230.69	5.4411
45	837.32	6.7302
45	163.55	5.0971
45	66.462	4.1966
45	26.633	3.2822
45	33.388	3.5082
45	22.441	3.1109
45	18.857	2.9369
45	127.98	4.8519
45	26.183	3.2651
45	3540.2	8.172
45	183.51	5.2123
45	30.674	3.4234
45	239.12	5.477
45	37.249	3.6176
45	6.6347	1.8923
45	62.316	4.1322
45	24.393	3.1943
45	308.23	5.7308
45	83.293	4.4224
45	8.9364	2.1901
45	89.853	4.4982
45	7.2601	1.9824
46	13.097	2.5724
46	4.5671	1.5189
46	355.28	5.8729
46	113.78	4.7343
46	36.639	3.6011
46	317.2	5.7595
46	361.76	5.891
46	0.52062	-0.65273
46	6.2702	1.8358
46	87.038	4.4663
46	76.604	4.3387
46	119.74	4.7853
46	12.43	2.5201
46	12.348	2.5135
46	125.37	4.8312
46	22.864	3.1296
46	94.178	4.5452
46	39.058	3.6651
46	19.309	2.9606
46	101.21	4.6172
46	11.681	2.458
46	40.218	3.6943
46	82.907	4.4177
46	26.861	3.2907
46	164.92	5.1055
46	6.3152	1.843
46	157.74	5.0609
46	45.333	3.814
46	30.549	3.4193
46	18.974	2.943
46	4.1714	1.4282
46	352.21	5.8642
46	77.29	4.3476
46	206.15	5.3286
46	275.75	5.6195
46	716.41	6.5743
46	259.59	5.5591
46	9.0377	2.2014
46	11054	9.3105
46	11.8	2.4681
47	108.92	4.6906
47	2562.7	7.8488
47	582.44	6.3672
47	238.39	5.4739
47	192	5.2575
47	5020	8.5212
47	132.83	4.8891
47	4.6874	1.5449
47	101.16	4.6167
47	100.68	4.6119
47	1333.8	7.1958
47	56.537	4.0349
47	125.41	4.8316
47	3.9006	1.3611
47	51.054	3.9329
47	229.24	5.4348
47	128.09	4.8527
47	548.79	6.3077
47	103.22	4.6369
47	105.27	4.6566
47	62.749	4.1392
47	11.061	2.4034
47	601.47	6.3994
47	58.653	4.0716
47	377.22	5.9328
47	277.22	5.6248
47	170.82	5.1406
47	27.646	3.3195
47	165.72	5.1103
47	158.55	5.0661
47	55.862	4.0229
47	8.466	2.1361
47	1435.3	7.2691
47	25.366	3.2334
47	52.095	3.9531
47	71.697	4.2725
47	4.3937	1.4802
47	25.71	3.2469
47	40.578	3.7032
47	82.72	4.4155
47	8529	9.0512
47	12.193	2.5009
47	136.15	4.9138
47	16.229	2.7868
47	45.394	3.8154
47	4.7631	1.5609
47	148.4	4.9999
47	8.5532	2.1463
47	110.79	4.7077
47	145.9	4.9829
47	173.33	5.1552
47	39.232	3.6695
47	4.1479	1.4226
47	24.19	3.1859
47	134.24	4.8997
47	97.257	4.5774
47	57.06	4.0441
47	77.569	4.3512
47	3.5297	1.2612
48	43.027	3.7618
48	7.3955	2.0009
48	17.376	2.8551
48	57.806	4.0571
48	108.49	4.6867
48	147.13	4.9913
48	283.16	5.646
48	681.81	6.5248
48	95.787	4.5621
48	90.162	4.5016
48	3.4014	1.2242
48	119.81	4.7859
48	66.902	4.2032
48	565.13	6.3371
48	109.3	4.6941
48	21.029	3.0459
48	1.7031	0.53246
48	61.687	4.1221
48	90.898	4.5097
48	389.85	5.9658
48	5.0017	1.6098
48	17.001	2.8333
48	34.659	3.5456
48	50.397	3.9199
48	5.8505	1.7665
48	24.301	3.1905
48	12.655	2.5381
48	191.07	5.2526
48	47.735	3.8657
48	2.797	1.0285
48	134.96	4.905
48	28.275	3.342
48	10.659	2.3664
48	514.22	6.2427
48	497.76	6.2101
48	83.114	4.4202
48	6.5521	1.8798
48	824.36	6.7146
48	59.676	4.0889
48	94.588	4.5495
48	27.379	3.3098
48	114.97	4.7447
48	37.076	3.613
48	439.66	6.086
48	688.79	6.5349
48	26.597	3.2808
48	34.94	3.5536
48	22.125	3.0967
48	21.261	3.0569
48	144.27	4.9717
48	59.554	4.0869
48	54.909	4.0057
48	17.418	2.8575
49	106.39	4.6671
49	104.77	4.6518
49	30.907	3.431
49	1144.8	7.043
49	337.03	5.8202
49	9.4983	2.2511
49	871.2	6.7699
49	1172.2	7.0666
49	72.033	4.2771
49	212.16	5.3573
49	64.339	4.1642
49	12.404	2.518
49	141.89	4.9551
49	107.9	4.6812
49	479.9	6.1736
49	67.259	4.2086
49	162.79	5.0924
49	16.29	2.7906
49	90.616	4.5066
49	6.8256	1.9207
49	30.297	3.4111
49	3.2371	1.1747
49	12.386	2.5165
49	21.074	3.0481
49	39.582	3.6784
49	2.8889	1.0609
49	23.42	3.1536
49	63.612	4.1528
49	5.2803	1.664
49	281.89	5.6415
49	49.45	3.901
49	102.2	4.627
49	31.295	3.4435
49	107.62	4.6786
49	395.86	5.9811
49	1.2209	0.1996
49	92.157	4.5235
49	591.06	6.3819
49	19.165	2.9531
49	5.9837	1.789
49	41.351	3.7221
49	2.9273	1.0741
49	99.702	4.6022
49	23.094	3.1396
49	37.682	3.6292
49	17.27	2.849
49	285.5	5.6542
49	32.557	3.483
49	17.537	2.8643
49	58.408	4.0675
49	261.96	5.5682
49	237.59	5.4705
49	33.914	3.5238
49	70.316	4.253
49	41.017	3.714
49	30.834	3.4286
49	187.86	5.2357
49	506.16	6.2269
49	0.40878	-0.89459
49	997.04	6.9048
49	441.75	6.0907
49	141.59	4.9529
50	7.663	2.0364
50	10.132	2.3157
50	4.739	1.5558
50	71.661	4.2719
50	29.68	3.3905
50	122.46	4.8078
50	10.962	2.3945
50	24.522	3.1996
50	50.646	3.9249
50	35.962	3.5825
50	326.65	5.7889
50	41.961	3.7367
50	8.7866	2.1732
50	0.78631	-0.24041
50	38.482	3.6502
50	113.68	4.7334
50	32.561	3.4831
50	36.692	3.6026
50	11.039	2.4014
50	11.2	2.4159
50	27.736	3.3227
50	42.098	3.74
50	15.609	2.7479
50	35.122	3.5588
50	68.541	4.2274
50	138.07	4.9278
50	75.783	4.3279
50	31.867	3.4616
50	120.33	4.7903
50	38.658	3.6548
50	23.031	3.1368
50	59.092	4.0791
50	461.78	6.1351
50	78.905	4.3682
50	0.75683	-0.27862
50	22.867	3.1297
50	22.432	3.1105
50	3.9647	1.3774
50	18.919	2.9402
50	137.92	4.9267
50	89.599	4.4953
50	4.1523	1.4237
50	366.14	5.903
50	48.646	3.8846
50	53.569	3.981
50	140.84	4.9476
50	52.636	3.9634
50	37.693	3.6295
50	2.1637	0.77182
50	210.96	5.3517
50	223.61	5.4099
50	0.42589	-0.85358
50	43.019	3.7616
50	552.45	6.3144
50	127.54	4.8484
50	242.68	5.4918
50	64.282	4.1633
50	2055.1	7.6281
50	2549.4	7.8436
50	6.3593	1.8499
50	24.418	3.1953
50	15.545	2.7438
50	56.639	4.0367
51	17.041	2.8356
51	2.4672	0.9031
51	4.4959	1.5032
51	171.18	5.1427
51	129.8	4.866
51	23.748	3.1675
51	9.2414	2.2237
51	12.623	2.5355
51	12.583	2.5323
51	50.173	3.9155
51	23.481	3.1562
51	29.058	3.3693
51	590.76	6.3814
51	115.51	4.7493
51	4.2467	1.4461
51	106.12	4.6645
51	2.4374	0.89092
51	131.39	4.8781
51	1.3377	0.29096
51	1.1795	0.16512
51	75.911	4.3296
51	30.64	3.4223
51	1031.6	6.9388
51	99.718	4.6023
51	39.61	3.6791
51	24.493	3.1984
51	18.888	2.9385
51	7.5565	2.0224
51	9.944	2.297
51	259.33	5.5581
51	4.4321	1.4889
51	13.92	2.6333
51	67.618	4.2139
51	47.293	3.8564
51	10.031	2.3057
51	90.344	4.5036
51	165.16	5.1069
51	113.86	4.735
51	20.945	3.0419
51	52.447	3.9598
51	106.64	4.6695
51	148.56	5.001
51	53.873	3.9866
51	31.848	3.461
51	10.05	2.3076
51	119.6	4.7842
51	4.786	1.5657
51	16.835	2.8235
51	88.321	4.481
51	3.0622	1.1191
51	208.25	5.3388
51	31.26	3.4423
51	29.698	3.3911
51	221.47	5.4003
51	28.606	3.3536
51	2.4963	0.91482
51	73.652	4.2993
51	15.685	2.7527
51	11.584	2.4496
51	25.57	3.2414
51	643.3	6.4666
51	10.688	2.3692
51	3.3291	1.2027
51	6.8306	1.9214
51	7.98	2.0769
51	77.182	4.3462
51	1328.9	7.1921
51	1.2541	0.22639
51	219.6	5.3918
51	0.77096	-0.26012
51	45.071	3.8082
51	30.322	3.4119
51	22.151	3.0979
51	17.441	2.8588
51	85.688	4.4507
51	294.39	5.6849
51	62.345	4.1327
51	64.836	4.1719
51	11.438	2.437
51	40.536	3.7022
51	35.088	3.5579
51	79.295	4.3732
52	6.0815	1.8053
52	42.589	3.7516
52	21.315	3.0594
52	3.418	1.2291
52	42.772	3.7559
52	14.077	2.6446
52	250.67	5.5241
52	15.355	2.7314
52	38.161	3.6418
52	222.65	5.4056
52	264.64	5.5784
52	199.79	5.2973
52	1.6599	0.50677
52	197.3	5.2847
52	56.134	4.0277
52	1212.8	7.1007
52	32.422	3.4788
52	52.588	3.9625
52	49.588	3.9037
52	14.382	2.666
52	2.3881	0.8705
52	490.16	6.1947
52	15.633	2.7494
52	20.252	3.0082
52	53.586	3.9813
52	86.772	4.4633
52	6.0528	1.8005
52	141.24	4.9505
52	447.41	6.1035
52	4.036	1.3953
52	5.7101	1.7422
52	42.042	3.7387
52	1146.1	7.0441
52	1230	7.1148
52	58.558	4.07
52	0.022571	-3.7911
52	14.259	2.6574
52	66.059	4.1906
52	9.466	2.2477
52	21.801	3.0819
52	9.1407	2.2127
52	83.025	4.4191
52	758.97	6.632
52	83.538	4.4253
52	39.82	3.6844
52	40.936	3.712
52	0.92185	-0.081373
52	122.77	4.8103
52	215.9	5.3748
52	96.472	4.5693
52	45.682	3.8217
52	18.48	2.9167
52	191.63	5.2555
52	56.367	4.0319
52	5.332	1.6737
52	22.512	3.114
52	27.908	3.3289
52	19.835	2.9874
52	76.303	4.3347
52	2.2172	0.79623
52	55.361	4.0139
52	52.349	3.9579
52	29.15	3.3725
52	92.138	4.5233
52	18.735	2.9304
52	5.5041	1.7055
52	136.14	4.9137
52	89.031	4.489
52	62.754	4.1392
52	22.253	3.1025
52	4.6748	1.5422
52	31.877	3.4619
52	1024.5	6.932
52	132.82	4.889
52	119.21	4.7808
52	174.97	5.1646
52	568.54	6.3431
52	79.892	4.3807
52	213.49	5.3636
52	2.0693	0.72722
52	19.967	2.9941
52	24.019	3.1788
52	1033	6.9403
52	281.51	5.6402
53	194.92	5.2726
53	67.273	4.2088
53	13.128	2.5747
53	391.48	5.9699
53	1360.8	7.2159
53	23.76	3.168
53	34.113	3.5297
53	1.7978	0.58655
53	4.9008	1.5894
53	11.582	2.4494
53	27.675	3.3205
53	18.105	2.8962
53	4.5785	1.5214
53	16.603	2.8096
53	22.975	3.1344
53	31.786	3.459
53	148.38	4.9998
53	0.11861	-2.1319
53	217.61	5.3827
53	2.0063	0.69631
53	92.137	4.5233
53	3.2186	1.169
53	129.14	4.8609
53	132.68	4.8879
53	57.393	4.0499
53	9.6773	2.2698
53	116.95	4.7618
53	44.822	3.8027
53	45.059	3.808
53	41.402	3.7233
53	6.9238	1.935
53	248.38	5.515
53	8.7308	2.1669
53	6.6876	1.9002
53	6.5609	1.8811
53	12.73	2.544
53	53.18	3.9737
53	2.6995	0.99305
53	27.077	3.2987
53	18.261	2.9048
53	18.594	2.9228
53	6.5931	1.886
53	2.4936	0.91373
53	202.08	5.3087
53	120.54	4.792
53	79.186	4.3718
53	16.866	2.8253
53	156.02	5.05
53	71.988	4.2765
53	46.217	3.8333
53	4.2871	1.4556
53	4.8938	1.588
53	3.2976	1.1932
53	2.6069	0.95817
53	32.518	3.4818
53	9.9339	2.296
53	346.14	5.8469
53	21.272	3.0574
53	5.4604	1.6975
53	259.56	5.559
53	21.206	3.0543
53	9.7483	2.2771
53	17.034	2.8352
53	8051.3	8.9936
53	58.791	4.074
53	33.797	3.5204
53	1.6681	0.51166
53	1472.8	7.2949
53	6.3449	1.8476
53	5.5908	1.7211
53	97.087	4.5756
53	0.28734	-1.2471
53	53.737	3.9841
53	12.016	2.4863
53	1.1738	0.16023
53	50.667	3.9253
53	6.2001	1.8246
53	25.065	3.2215
53	5.186	1.646
53	37.36	3.6206
53	0.88305	-0.12437
53	11.28	2.4231
53	1.8712	0.62658
53	13.531	2.605
53	47.819	3.8674
53	1.0301	0.02965
53	106.35	4.6667
53	686.81	6.5321
53	148.99	5.0039
53	1.8579	0.61945
53	19.121	2.9508
54	9.6292	2.2648
54	11.928	2.4789
54	10.236	2.3259
54	2.443	0.89323
54	128.68	4.8573
54	153.69	5.0349
54	15.851	2.7632
54	88.044	4.4778
54	0.4138	-0.88238
54	15.942	2.769
54	25.922	3.2551
54	517.04	6.2481
54	99.399	4.5991
54	16.254	2.7883
54	18.04	2.8926
54	107.29	4.6755
54	15592	9.6545
54	5.1355	1.6362
54	118.89	4.7782
54	1.8746	0.62838
54	109.06	4.6919
54	28.89	3.3635
54	26.265	3.2682
54	122.77	4.8103
54	55.321	4.0132
54	9.6678	2.2688
54	107.14	4.6741
54	9.1213	2.2106
54	35.55	3.5709
54	15.044	2.711
54	402.04	5.9966
54	131.73	4.8808
54	37.819	3.6328
54	78.188	4.3591
54	11.376	2.4315
54	9.6913	2.2712
54	47.553	3.8618
54	23.608	3.1616
54	20.731	3.0316
54	21.319	3.0596
54	6.3725	1.852
54	60.739	4.1066
54	13.065	2.57
54	13.095	2.5722
54	46.695	3.8436
54	54.218	3.993
54	2000.4	7.6011
54	36.762	3.6045
54	18.219	2.9025
54	18.38	2.9113
54	48.644	3.8845
54	62.489	4.135
54	329.42	5.7973
54	25.027	3.22
54	59.631	4.0882
54	49.217	3.8962
54	2.4509	0.89647
54	1208.6	7.0972
54	4.6633	1.5397
54	242.34	5.4903
54	229.01	5.4338
54	55.357	4.0138
54	17.078	2.8378
54	27.921	3.3294
54	2959.4	7.9927
54	51.74	3.9462
54	1.7578	0.56406
54	28.859	3.3624
54	283.21	5.6462
54	62.422	4.1339
54	6.3808	1.8533
54	8.4034	2.1286
54	49.596	3.9039
54	54.497	3.9982
54	2827.6	7.9472
54	28.634	3.3546
54	43.177	3.7653
54	20.684	3.0294
54	122.21	4.8057
54	11.995	2.4845
54	3.3249	1.2014
54	47.231	3.8551
54	23.625	3.1623
54	107.7	4.6793
54	2.1368	0.75931
54	42.183	3.742
54	6.372	1.8519
54	723.47	6.5841
54	9.8304	2.2855
54	33.332	3.5065
54	4.0869	1.4078
55	8.2326	2.1081
55	79.195	4.3719
55	48.969	3.8912
55	97.642	4.5813
55	5.9365	1.7811
55	25.298	3.2307
55	64.027	4.1593
55	491.22	6.1969
55	4.5899	1.5239
55	33.9	3.5234
55	14.755	2.6916
55	7.3301	1.992
55	35.353	3.5654
55	31.853	3.4611
55	60.091	4.0959
55	17.501	2.8622
55	121.75	4.802
55	108.13	4.6833
55	258.59	5.5552
55	7.4033	2.0019
55	1.5955	0.46721
55	34.535	3.542
55	6.2069	1.8257
55	0.59546	-0.51842
55	3.6119	1.2842
55	13.918	2.6332
55	48.826	3.8883
55	115.36	4.748
55	387.78	5.9604
55	31.571	3.4523
55	9.0194	2.1994
55	642.82	6.4659
55	2.7091	0.9966
55	323.26	5.7785
55	16.344	2.7939
55	76.087	4.3319
55	0.51222	-0.669
55	505.62	6.2258
55	29.75	3.3928
55	15.218	2.7225
55	155.4	5.046
55	0.31975	-1.1402
55	25.973	3.2571
55	88.352	4.4813
55	131.71	4.8806
55	28.693	3.3566
55	20.52	3.0214
55	46.187	3.8327
55	15.314	2.7288
55	64.535	4.1672
55	44.986	3.8064
55	165.25	5.1075
55	23.865	3.1724
55	61.194	4.1141
55	1.0209	0.02068
55	10.173	2.3197
55	0.41338	-0.88339
55	3.7821	1.3303
55	52.559	3.9619
55	9.1303	2.2116
55	31.267	3.4426
55	3.9643	1.3773
55	12.453	2.5219
55	2.2156	0.79553
55	3.6055	1.2825
55	33.556	3.5132
55	4.7406	1.5562
55	194.55	5.2707
55	67.138	4.2067
55	17.476	2.8608
55	166.33	5.114
55	14.089	2.6454
55	77.064	4.3446
55	13.925	2.6337
55	129.08	4.8604
55	48.009	3.8714
55	1.6538	0.50308
55	21.138	3.0511
55	513.72	6.2417
55	16.796	2.8211
55	29.158	3.3727
55	29.744	3.3926
55	27.582	3.3172
55	126.6	4.841
55	42.942	3.7598
55	1.7063	0.53433
55	4.5434	1.5137
55	7.0592	1.9543
55	224.36	5.4132
55	39.685	3.681
55	30.59	3.4207
55	12.219	2.503
55	39.031	3.6643
55	17.193	2.8445
55	44.357	3.7923
55	108.67	4.6883
55	57.808	4.0571
55	0.16122	-1.825
55	22.213	3.1007
55	9.88	2.2905
55	232.1	5.4472
55	32.827	3.4913
55	148.83	5.0028
55	41.566	3.7273
55	42.302	3.7448
56	18.234	2.9033
56	14.063	2.6436
56	23.323	3.1495
56	18.619	2.9242
56	30.244	3.4093
56	12.593	2.5331
56	0.77501	-0.25488
56	19.226	2.9563
56	4.4572	1.4945
56	6.3627	1.8505
56	23.019	3.1363
56	153.97	5.0368
56	11.263	2.4215
56	99.059	4.5957
56	37.446	3.6229
56	24.836	3.2123
56	13.495	2.6024
56	43.478	3.7723
56	65.611	4.1837
56	16.03	2.7745
56	51.569	3.9429
56	48.099	3.8733
56	67.556	4.213
56	104.34	4.6477
56	27.169	3.3021
56	179.41	5.1897
56	14.191	2.6526
56	6.2539	1.8332
56	31.96	3.4645
56	38.026	3.6383
56	0.62026	-0.47761
56	321.16	5.7719
56	50.548	3.9229
56	8.6408	2.1565
56	14.799	2.6946
56	104.47	4.6489
56	18.454	2.9153
56	118.84	4.7778
56	24.864	3.2134
56	120.78	4.794
56	43.155	3.7648
56	14.318	2.6615
56	9.1049	2.2088
56	8.0607	2.087
56	277.24	5.6249
56	76.207	4.3334
56	13.849	2.6282
56	49.461	3.9012
56	17.476	2.8608
56	121.2	4.7975
56	346.34	5.8474
56	3.6592	1.2973
56	33.217	3.5031
56	102.73	4.6321
56	27.83	3.3261
56	26.871	3.2911
56	9.9947	2.3021
56	17.294	2.8504
56	206.03	5.328
56	23.756	3.1678
56	41.952	3.7365
56	4.1531	1.4239
56	14.573	2.6792
56	50.297	3.9179
56	154.08	5.0375
56	12.127	2.4955
56	9.6739	2.2694
56	2.7999	1.0296
56	78.758	4.3664
56	26.095	3.2617
56	8.6894	2.1621
56	84.296	4.4343
56	2.859	1.0505
56	23.075	3.1387
56	5.0691	1.6232
56	6.497	1.8713
56	16.261	2.7887
56	17.972	2.8888
56	2.8502	1.0474
56	0.26183	-1.3401
56	20.813	3.0356
56	5.214	1.6514
56	50.602	3.924
56	274.6	5.6153
56	6.9639	1.9407
56	0.59782	-0.51447
56	13.066	2.57
56	7.0625	1.9548
56	23.199	3.1441
56	51.191	3.9356
56	2.224	0.79931
56	18.208	2.9019
56	17.986	2.8896
56	61.947	4.1263
56	119.47	4.7831
56	164.61	5.1036
56	0.51155	-0.67032
56	5.0357	1.6165
56	5.3957	1.6856
56	16.678	2.8141
56	12.105	2.4936
56	3.4593	1.2411
56	38.44	3.6491
56	68.659	4.2292
57	365.12	5.9002
57	9.8692	2.2894
57	16.562	2.8071
57	7.0255	1.9495
57	34.218	3.5328
57	84.009	4.4309
57	4.7618	1.5606
57	77.187	4.3462
57	12.92	2.5587
57	92.354	4.5256
57	101.04	4.6155
57	18.13	2.8976
57	37.455	3.6231
57	20.23	3.0072
57	4.6114	1.5285
57	41.797	3.7328
57	82.443	4.4121
57	14.369	2.6651
57	271.59	5.6043
57	206.21	5.3289
57	160.76	5.0799
57	227.51	5.4272
57	89.865	4.4983
57	31.951	3.4642
57	45.895	3.8264
57	6.8072	1.918
57	30.695	3.4241
57	2.7024	0.99415
57	86.92	4.465
57	70.222	4.2517
57	65.778	4.1863
57	41.494	3.7255
57	89.606	4.4954
57	109.68	4.6975
57	17.915	2.8856
57	22.075	3.0944
57	2.2891	0.82817
57	73.226	4.2936
57	25.227	3.2279
57	18.232	2.9032
57	19.325	2.9614
57	10.125	2.315
57	86.507	4.4602
57	21.56	3.0708
57	1.0119	0.0118
57	129.24	4.8617
57	4.0469	1.3979
57	102.87	4.6335
57	8.3098	2.1174
57	10.127	2.3152
57	36.102	3.5864
57	15.551	2.7441
57	273.18	5.6101
57	5.2264	1.6537
57	15.535	2.7431
57	6.4986	1.8716
57	113.68	4.7334
57	30.74	3.4256
57	21.541	3.0699
57	5.0748	1.6243
57	273.23	5.6103
57	21.32	3.0596
57	66.024	4.19
57	15.721	2.755
57	78.949	4.3688
57	305.84	5.7231
57	5.0222	1.6139
57	171.47	5.1444
57	3.9205	1.3662
57	5.3176	1.671
57	40.499	3.7013
57	25.337	3.2323
57	6.6628	1.8965
57	65.176	4.1771
57	3.4124	1.2274
57	57.023	4.0435
57	74.461	4.3103
57	3.0408	1.1121
57	32.15	3.4704
57	0.80343	-0.21887
57	163.52	5.0969
57	139.06	4.9349
57	21.587	3.0721
57	34.46	3.5398
57	5.2213	1.6527
57	3.3067	1.1959
57	2.4264	0.88642
57	5.5622	1.716
57	29.177	3.3734
57	53.067	3.9716
57	5.4631	1.698
57	51.188	3.9355
57	258.41	5.5546
57	21.459	3.0661
57	32.213	3.4724
57	3.625	1.2879
57	17.035	2.8353
57	14.658	2.685
57	2.9589	1.0848
57	19.299	2.9601
57	48.622	3.8841
57	58.452	4.0682
57	14.468	2.6719
57	29.493	3.3841
57	41.13	3.7167
57	310.08	5.7368
57	13.956	2.6359
57	8.6942	2.1627
57	5.4217	1.6904
57	6.5863	1.885
57	2.3825	0.86813
57	14.896	2.7011
57	3.7447	1.3203
58	6.8507	1.9243
58	53.519	3.98
58	42.79	3.7563
58	16.937	2.8295
58	10.06	2.3086
58	7.9781	2.0767
58	17.777	2.8779
58	27.702	3.3215
58	12.376	2.5157
58	68.172	4.222
58	19.335	2.9619
58	42.106	3.7402
58	17.608	2.8684
58	690.61	6.5376
58	78.388	4.3617
58	2.4218	0.88453
58	445.47	6.0991
58	88.716	4.4854
58	111.07	4.7102
58	64.713	4.17
58	3.0373	1.111
58	2.1053	0.74447
58	1.1235	0.11644
58	9.5951	2.2613
58	13.751	2.6211
58	46.792	3.8457
58	57.373	4.0496
58	8.0033	2.0799
58	32.934	3.4945
58	9.9754	2.3001
58	2.5684	0.94328
58	75.679	4.3265
58	8.5491	2.1458
58	21.343	3.0607
58	0.10068	-2.2958
58	27.002	3.2959
58	0.7801	-0.24833
58	2.9126	1.069
58	17.351	2.8536
58	117.35	4.7651
58	47.381	3.8582
58	22.939	3.1328
58	98.572	4.5908
58	2.1898	0.78382
58	16.636	2.8116
58	46.253	3.8341
58	18.48	2.9167
58	0.24605	-1.4022
58	110.1	4.7014
58	13.808	2.6253
58	0.32717	-1.1173
58	2.0719	0.72847
58	16.198	2.7849
58	66.515	4.1974
58	52.49	3.9606
58	28.596	3.3533
58	4.8005	1.5687
58	1.5232	0.42083
58	22.049	3.0933
58	10.994	2.3973
58	72.726	4.2867
58	0.88812	-0.11865
58	0.88424	-0.12302
58	13.077	2.5708
58	37.011	3.6112
58	3.6652	1.2989
58	5.1391	1.6369
58	7.1344	1.9649
58	65.032	4.1749
58	1597.8	7.3764
58	325.18	5.7844
58	183.43	5.2118
58	45.227	3.8117
58	3.5747	1.2739
58	36.4	3.5946
58	5.1812	1.645
58	11.49	2.4415
58	32.889	3.4931
58	2.5971	0.95439
58	2.1049	0.74425
58	38.978	3.663
58	1.7159	0.53996
58	1.2316	0.20828
58	2.5377	0.93126
58	13.452	2.5992
58	366.65	5.9044
58	44.638	3.7986
58	3.988	1.3833
58	4.9107	1.5914
58	10.499	2.3513
58	2.9573	1.0843
58	17.897	2.8846
58	23.65	3.1634
58	3.7727	1.3278
58	18.473	2.9163
58	61.851	4.1247
58	79.696	4.3782
58	19.429	2.9667
58	64.573	4.1678
58	0.78717	-0.23931
58	3.1289	1.1407
58	13.922	2.6334
58	169.66	5.1338
58	0.099636	-2.3062
58	160.97	5.0812
58	30.289	3.4108
58	12.117	2.4946
58	24.59	3.2023
58	25.423	3.2356
58	10.856	2.3847
58	65.398	4.1805
58	20.718	3.031
58	3.3128	1.1978
58	14.76	2.6919
58	20.25	3.0081
58	15.274	2.7261
58	55.262	4.0121
58	16.726	2.817
58	20.778	3.0339
58	137.48	4.9235
58	2.4458	0.89438
58	47.957	3.8703
58	0.71863	-0.33041
58	5.0817	1.6256
58	1343.8	7.2033
58	14.991	2.7075
58	3.848	1.3476
58	12.886	2.5561
58	2.0945	0.7393
58	1.8739	0.62804
58	217.4	5.3817
58	107.16	4.6743
58	118.35	4.7737
58	23.629	3.1625
58	14.739	2.6905
58	4.7155	1.5508
58	3.9601	1.3763
58	0.053593	-2.9263
59	15.738	2.7561
59	48.227	3.8759
59	47.672	3.8643
59	11.012	2.399
59	10.712	2.3714
59	36.196	3.5889
59	27.96	3.3308
59	0.92888	-0.073773
59	553.15	6.3156
59	24.191	3.186
59	3.7658	1.326
59	19.844	2.9879
59	8.6122	2.1532
59	0.11738	-2.1423
59	2.6523	0.97542
59	10.05	2.3076
59	1.4087	0.34263
59	30.988	3.4336
59	22.508	3.1139
59	2.0043	0.69532
59	24.257	3.1887
59	9.2417	2.2237
59	13.924	2.6336
59	40.737	3.7071
59	117.39	4.7655
59	1.336	0.28969
59	18.859	2.937
59	0.88825	-0.1185
59	45.932	3.8272
59	10.836	2.3829
59	21.429	3.0647
59	31.684	3.4558
59	22.753	3.1247
59	8.8544	2.1809
59	1.3274	0.28324
59	2.4987	0.91576
59	0.82829	-0.1884
59	6.7049	1.9028
59	27.787	3.3246
59	6.0477	1.7997
59	15.06	2.7121
59	1.4791	0.39141
59	17.901	2.8848
59	29.219	3.3748
59	4.7985	1.5683
59	17.219	2.846
59	10.684	2.3688
59	58.653	4.0716
59	11.489	2.4414
59	19.502	2.9705
59	39.879	3.6859
59	7.1635	1.969
59	40.955	3.7125
59	12.723	2.5434
59	1.9017	0.64274
59	10.947	2.3931
59	4.7649	1.5613
59	6.2275	1.829
59	0.30816	-1.1771
59	64.525	4.1671
59	6.7779	1.9137
59	25.394	3.2345
59	46.147	3.8318
59	4.2244	1.4409
59	52.845	3.9674
59	7.6553	2.0354
59	27.077	3.2987
59	5.1672	1.6423
59	6.996	1.9453
59	12.262	2.5065
59	60.363	4.1004
59	0.17947	-1.7177
59	35.136	3.5592
59	31.319	3.4442
59	15.794	2.7596
59	18.383	2.9114
59	35.675	3.5744
59	7.0881	1.9584
59	49.218	3.8963
59	14.91	2.702
59	6.1022	1.8086
59	5.1607	1.6411
59	74.954	4.3169
59	13.801	2.6247
59	6.4849	1.8695
59	34.542	3.5422
59	5.9951	1.7909
59	236.8	5.4672
59	1.6914	0.52556
59	27.91	3.329
59	22.532	3.1149
59	186.59	5.2289
59	84.783	4.4401
59	49.722	3.9064
59	45.435	3.8163
59	8.6195	2.154
59	40.896	3.711
59	32.312	3.4754
59	29.624	3.3886
59	82.532	4.4132
59	551.01	6.3118
59	21.733	3.0788
59	13.859	2.6289
59	64.186	4.1618
59	3.2377	1.1749
59	13.193	2.5797
59	49.609	3.9042
59	30.894	3.4306
59	2.466	0.90261
59	4.0883	1.4081
59	4.2465	1.4461
59	36.219	3.5896
59	160.23	5.0766
59	28.72	3.3576
59	34.986	3.555
59	9.7276	2.275
59	5.326	1.6726
59	8.7079	2.1642
59	2.0154	0.70081
59	9.638	2.2657
59	33.781	3.5199
59	9.6274	2.2646
59	25.94	3.2558
59	12.832	2.5519
60	30.414	3.4149
60	11.256	2.4209
60	5.1559	1.6401
60	46.991	3.85
60	26.947	3.2939
60	7.447	2.0078
60	18.605	2.9235
60	126.33	4.8389
60	12.298	2.5094
60	7.6576	2.0357
60	4.8445	1.5779
60	1.8465	0.61331
60	146.64	4.988
60	5.1535	1.6397
60	10.238	2.3261
60	16.197	2.7848
60	0.1214	-2.1086
60	0.31947	-1.1411
60	3.4722	1.2448
60	12.304	2.5099
60	19.241	2.957
60	48.205	3.8755
60	1.9652	0.67559
60	9.1645	2.2153
60	30.37	3.4135
60	5.6503	1.7317
60	29.209	3.3745
60	59.589	4.0875
60	1.2066	0.18782
60	6.0991	1.8081
60	72.814	4.2879
60	15.488	2.7401
60	12.763	2.5465
60	56.105	4.0272
60	5.502	1.7051
60	10.481	2.3496
60	2.1829	0.78067
60	6.2333	1.8299
60	41.708	3.7307
60	5.7318	1.746
60	25.645	3.2443
60	3.7889	1.3321
60	9.6634	2.2683
60	20.294	3.0103
60	35.124	3.5589
60	62.311	4.1321
60	2.6564	0.97697
60	83.09	4.4199
60	9.4041	2.2411
60	13.978	2.6375
60	5.6581	1.7331
60	13.03	2.5673
60	0.62757	-0.4659
60	5.4707	1.6994
60	6.8427	1.9232
60	31.371	3.4459
60	3.9763	1.3804
60	10.662	2.3667
60	58.588	4.0705
60	4.2046	1.4362
60	33.463	3.5104
60	20.968	3.043
60	10.798	2.3794
60	90.263	4.5027
60	5.6224	1.7268
60	36.038	3.5846
60	24.872	3.2138
60	7.7451	2.0471
60	33.029	3.4974
60	2.9214	1.0721
60	11.848	2.4721
60	4.9985	1.6091
60	12.715	2.5428
60	24.806	3.2111
60	20.848	3.0372
60	247.59	5.5118
60	25.525	3.2397
60	32.301	3.4751
60	0.93281	-0.069557
60	8.7367	2.1675
60	106.59	4.669
60	24.862	3.2134
60	36.723	3.6034
60	8.3439	2.1215
60	8.9073	2.1869
60	5.3164	1.6708
60	13.547	2.6062
60	0.1815	-1.7065
60	38.04	3.6386
60	8.6677	2.1596
60	9.4761	2.2488
60	32.129	3.4698
60	14.141	2.6491
60	299.24	5.7012
60	0.40365	-0.90721
60	0.30321	-1.1933
60	5.7766	1.7538
60	3.3377	1.2053
60	1.4812	0.39287
60	0.59077	-0.52633
60	0.96124	-0.039529
60	1.3433	0.29512
60	8.6035	2.1522
60	1.3456	0.2968
60	3.3406	1.2062
60	239.4	5.4781
60	13.016	2.5661
60	41.282	3.7204
60	8.2552	2.1108
60	10.206	2.323
60	13.544	2.606
60	97.363	4.5784
60	12.563	2.5307
60	22.341	3.1064
60	4.4603	1.4952
60	1.6455	0.49805
60	2.9234	1.0728
60	27.943	3.3302
60	72.329	4.2812
60	3.6921	1.3062
60	18.733	2.9303
60	5.0088	1.6112
60	1.5734	0.45325
60	15.977	2.7712
60	0.71566	-0.33455
60	22.67	3.121
60	5.057	1.6208
61	4.6239	1.5312
61	4.7583	1.5599
61	23.089	3.1393
61	125.05	4.8287
61	20.565	3.0236
61	0.87365	-0.13507
61	8.6257	2.1547
61	209.04	5.3425
61	0.13343	-2.0142
61	4.0538	1.3996
61	1.4489	0.37083
61	9.2812	2.228
61	21.977	3.09
61	2.264	0.81715
61	15.907	2.7667
61	8.6096	2.1529
61	1.2612	0.23205
61	1.3123	0.27175
61	14.366	2.6649
61	3.1183	1.1373
61	63.001	4.1431
61	4.593	1.5245
61	52.005	3.9513
61	91.281	4.5139
61	1.729	0.54757
61	22.103	3.0957
61	37.924	3.6356
61	4.1854	1.4316
61	6.634	1.8922
61	9.4461	2.2456
61	67.461	4.2115
61	43.088	3.7633
61	61.693	4.1222
61	2.6757	0.98421
61	9.8604	2.2885
61	9.9783	2.3004
61	3.5333	1.2622
61	24.004	3.1782
61	12.302	2.5098
61	16.042	2.7752
61	59.043	4.0783
61	8.3314	2.12
61	2.3247	0.84358
61	4.3434	1.4687
61	4.7923	1.567
61	1.5226	0.42042
61	45.581	3.8195
61	4.2542	1.4479
61	25.42	3.2355
61	1.307	0.26771
61	3.9519	1.3742
61	0.95218	-0.049003
61	31.025	3.4348
61	5.3299	1.6733
61	17.747	2.8762
61	2.491	0.91269
61	4.1597	1.4254
61	33.024	3.4972
61	51.58	3.9431
61	6.4469	1.8636
61	119.92	4.7868
61	47.514	3.861
61	3.7808	1.3299
61	109.16	4.6928
61	6.5911	1.8857
61	7.5666	2.0237
61	4.3397	1.4678
61	31.278	3.4429
61	51.936	3.95
61	4.7487	1.5579
61	18.634	2.925
61	30.41	3.4148
61	0.60717	-0.49895
61	10.07	2.3095
61	33.578	3.5139
61	6.9992	1.9458
61	129.21	4.8614
61	20.876	3.0386
61	11.559	2.4474
61	10.265	2.3287
61	23.719	3.1663
61	6.0463	1.7994
61	19.747	2.983
61	11.855	2.4727
61	2.7416	1.0085
61	0.28213	-1.2654
61	0.48124	-0.73138
61	3.7688	1.3268
61	32.167	3.4709
61	3.9156	1.365
61	81.616	4.402
61	8.2366	2.1086
61	51.955	3.9504
61	8.2031	2.1045
61	168.87	5.1291
61	92.772	4.5301
61	75.767	4.3277
61	19.007	2.9448
61	3.3465	1.2079
61	1.2777	0.24506
61	354.49	5.8707
61	1.1287	0.12105
61	3.9503	1.3738
61	40.627	3.7044
61	38.683	3.6554
61	97.577	4.5806
61	39.834	3.6847
61	5.4893	1.7028
61	17.088	2.8384
61	3.4055	1.2254
61	1.0543	0.052905
61	91.054	4.5115
61	60.111	4.0962
61	3.2923	1.1916
61	250.7	5.5243
61	14.978	2.7066
61	5.5538	1.7145
61	29.552	3.3861
61	4.7939	1.5673
61	0.28461	-1.2566
61	10.417	2.3435
61	56.291	4.0305
61	62.63	4.1372
61	39.112	3.6664
61	15.382	2.7332
61	123.59	4.817
61	17.908	2.8853
61	70.147	4.2506
61	30.35	3.4128
61	4.3122	1.4614
61	82.909	4.4177
61	2.2025	0.7896
61	3.1714	1.1542
61	19.594	2.9752
61	4.9926	1.608
61	3.6139	1.2848
61	27.165	3.3019
61	2.8512	1.0477
61	43.389	3.7702
61	116.88	4.7612
61	11.45	2.438
61	51.691	3.9453
62	5.3657	1.68
62	121.86	4.8029
62	96.524	4.5698
62	3.4843	1.2483
62	15.372	2.7325
62	11.66	2.4561
62	22.507	3.1138
62	17.232	2.8468
62	62.453	4.1344
62	31.243	3.4418
62	18.941	2.9413
62	12.592	2.533
62	90.052	4.5004
62	6.3623	1.8504
62	54.713	4.0021
62	1.2578	0.22933
62	37.802	3.6324
62	4.8126	1.5712
62	3.6087	1.2833
62	7.3077	1.9889
62	0.75364	-0.28284
62	3.2071	1.1654
62	7.5112	2.0164
62	3.0821	1.1256
62	45.129	3.8095
62	1.8304	0.60455
62	41.846	3.734
62	138.23	4.9289
62	3.813	1.3384
62	41.224	3.719
62	1.3983	0.33523
62	1.3731	0.31711
62	3.3986	1.2234
62	48.527	3.8821
62	2.5735	0.94525
62	11.257	2.421
62	38.212	3.6432
62	8.9419	2.1908
62	5.805	1.7587
62	11.999	2.4848
62	94.696	4.5507
62	1.1965	0.17937
62	6.5275	1.876
62	3.8064	1.3367
62	0.18161	-1.7059
62	4.139	1.4204
62	1.6603	0.50703
62	2.0539	0.71974
62	2.846	1.0459
62	23.6	3.1612
62	10.662	2.3667
62	150.81	5.016
62	1.7738	0.5731
62	7.2909	1.9866
62	22.304	3.1048
62	4.8915	1.5875
62	1.6681	0.51169
62	10.14	2.3165
62	5.1974	1.6482
62	26.115	3.2625
62	0.97042	-0.03003
62	67.564	4.2131
62	2.9724	1.0894
62	7.9474	2.0728
62	30.544	3.4192
62	50.189	3.9158
62	26.45	3.2753
62	31.564	3.452
62	11.434	2.4366
62	98.325	4.5883
62	15.529	2.7427
62	20.163	3.0038
62	6.1307	1.8133
62	2.4455	0.89425
62	0.41671	-0.87537
62	11.825	2.4702
62	181.26	5.1999
62	62.121	4.1291
62	23.391	3.1523
62	6.2305	1.8295
62	14.478	2.6726
62	2.1188	0.75086
62	15.787	2.7592
62	1.7197	0.54218
62	22.644	3.1199
62	57.771	4.0565
62	3.0568	1.1174
62	21.183	3.0532
62	3.9045	1.3621
62	11.086	2.4056
62	4.4592	1.495
62	32.95	3.495
62	35.331	3.5648
62	8.214	2.1058
62	12.792	2.5488
62	17.606	2.8683
62	5.9913	1.7903
62	24.966	3.2175
62	5.6077	1.7241
62	32.166	3.4709
62	13.535	2.6053
62	1.6417	0.49575
62	8.3912	2.1272
62	23.187	3.1436
62	72.826	4.2881
62	140.83	4.9476
62	7.0637	1.955
62	7.0785	1.9571
62	11.983	2.4835
62	23.16	3.1424
62	17.542	2.8646
62	46.728	3.8444
62	20.483	3.0196
62	3.9887	1.3835
62	5.6407	1.73
62	73.514	4.2975
62	10.15	2.3175
62	14.706	2.6882
63	8.5065	2.1408
63	8.349	2.1221
63	1.4293	0.35722
63	35.789	3.5776
63	6.7842	1.9146
63	8.4086	2.1293
63	18.008	2.8908
63	15.285	2.7269
63	28.988	3.3669
63	109.39	4.695
63	16.682	2.8143
63	32.679	3.4867
63	17.455	2.8596
63	5.3841	1.6834
63	7.4659	2.0103
63	16.925	2.8288
63	490.45	6.1953
63	7.1901	1.9727
63	5.2991	1.6675
63	8.8421	2.1795
63	3.6393	1.2918
63	5.0995	1.6291
63	17.364	2.8544
63	83.729	4.4276
63	3.2851	1.1894
63	18.252	2.9043
63	12.248	2.5054
63	16.86	2.8249
63	20.414	3.0162
63	5.9458	1.7827
63	14.803	2.6949
63	19.165	2.9531
63	9.6299	2.2649
63	0.29764	-1.2119
63	23.439	3.1544
63	7.2936	1.987
63	16.637	2.8116
63	3.8915	1.3588
63	15.99	2.772
63	13.612	2.611
63	6.6227	1.8905
63	7.8298	2.0579
63	28.909	3.3642
63	22.194	3.0998
63	1.5545	0.44117
63	453.11	6.1161
63	7.5979	2.0279
63	0.56922	-0.5635
63	7.1561	1.968
63	2.4021	0.87632
63	28.249	3.341
63	2.8231	1.0378
63	1.6978	0.52936
63	1.8686	0.62521
63	44.457	3.7945
63	5.7719	1.753
63	12.953	2.5614
63	5.4753	1.7002
63	1.6992	0.53015
63	4.5786	1.5214
[truncated: 2,568 more rows]
