# Supplementary material for: Quantifying the Potential for Future Gene Therapy to Lower Lifetime Risk of Polygenic Late-Onset Diseases
Source: MDPI journal article supplement (doi:10.3390/ijms20133352), 2019-07-08
Supplement: s2 [file s2 › SuppFiles/Results/LODsCommonLow/T2D/DensityPostAnalysis.csv]

age	A..1..	A..2..	A..3..	A..4..	A..5..	A..6..	A..7..	A..8..	A..9..	A..10..	A..11..	A..12..	A..13..	A..14..	A..15..	A..16..	A..17..	A..18..	A..19..	A..20..
1	0.0000000e+00	0.0000000e+00	0.0000000e+00	0.0000000e+00	0.0000000e+00	0.0000000e+00	0.0000000e+00	0.0000000e+00	0.0000000e+00	0.0000000e+00	0.0000000e+00	0.0000000e+00	0.0000000e+00	0.0000000e+00	0.0000000e+00	0.0000000e+00	0.0000000e+00	0.0000000e+00	0.0000000e+00	0.0000000e+00
2	0.0000000e+00	0.0000000e+00	0.0000000e+00	0.0000000e+00	0.0000000e+00	0.0000000e+00	0.0000000e+00	0.0000000e+00	0.0000000e+00	0.0000000e+00	0.0000000e+00	0.0000000e+00	0.0000000e+00	0.0000000e+00	0.0000000e+00	0.0000000e+00	0.0000000e+00	0.0000000e+00	0.0000000e+00	0.0000000e+00
3	0.0000000e+00	0.0000000e+00	0.0000000e+00	0.0000000e+00	0.0000000e+00	0.0000000e+00	0.0000000e+00	0.0000000e+00	0.0000000e+00	0.0000000e+00	0.0000000e+00	0.0000000e+00	0.0000000e+00	0.0000000e+00	0.0000000e+00	0.0000000e+00	0.0000000e+00	0.0000000e+00	0.0000000e+00	0.0000000e+00
4	0.0000000e+00	0.0000000e+00	0.0000000e+00	0.0000000e+00	0.0000000e+00	0.0000000e+00	0.0000000e+00	0.0000000e+00	0.0000000e+00	0.0000000e+00	0.0000000e+00	0.0000000e+00	0.0000000e+00	0.0000000e+00	0.0000000e+00	0.0000000e+00	0.0000000e+00	0.0000000e+00	0.0000000e+00	0.0000000e+00
5	0.0000000e+00	0.0000000e+00	0.0000000e+00	0.0000000e+00	0.0000000e+00	0.0000000e+00	0.0000000e+00	0.0000000e+00	0.0000000e+00	0.0000000e+00	0.0000000e+00	0.0000000e+00	0.0000000e+00	0.0000000e+00	0.0000000e+00	0.0000000e+00	0.0000000e+00	0.0000000e+00	0.0000000e+00	0.0000000e+00
6	0.0000000e+00	0.0000000e+00	0.0000000e+00	0.0000000e+00	0.0000000e+00	0.0000000e+00	0.0000000e+00	0.0000000e+00	0.0000000e+00	0.0000000e+00	0.0000000e+00	0.0000000e+00	0.0000000e+00	0.0000000e+00	0.0000000e+00	0.0000000e+00	0.0000000e+00	0.0000000e+00	0.0000000e+00	0.0000000e+00
7	0.0000000e+00	0.0000000e+00	0.0000000e+00	0.0000000e+00	0.0000000e+00	0.0000000e+00	0.0000000e+00	0.0000000e+00	0.0000000e+00	0.0000000e+00	0.0000000e+00	0.0000000e+00	0.0000000e+00	0.0000000e+00	0.0000000e+00	0.0000000e+00	0.0000000e+00	0.0000000e+00	0.0000000e+00	0.0000000e+00
8	0.0000000e+00	0.0000000e+00	0.0000000e+00	0.0000000e+00	0.0000000e+00	0.0000000e+00	0.0000000e+00	0.0000000e+00	0.0000000e+00	0.0000000e+00	0.0000000e+00	0.0000000e+00	0.0000000e+00	0.0000000e+00	0.0000000e+00	0.0000000e+00	0.0000000e+00	0.0000000e+00	0.0000000e+00	0.0000000e+00
9	0.0000000e+00	0.0000000e+00	0.0000000e+00	0.0000000e+00	0.0000000e+00	0.0000000e+00	0.0000000e+00	0.0000000e+00	0.0000000e+00	0.0000000e+00	0.0000000e+00	0.0000000e+00	0.0000000e+00	0.0000000e+00	0.0000000e+00	0.0000000e+00	0.0000000e+00	0.0000000e+00	0.0000000e+00	0.0000000e+00
10	0.0000000e+00	0.0000000e+00	0.0000000e+00	0.0000000e+00	0.0000000e+00	0.0000000e+00	0.0000000e+00	0.0000000e+00	0.0000000e+00	0.0000000e+00	0.0000000e+00	0.0000000e+00	0.0000000e+00	0.0000000e+00	0.0000000e+00	0.0000000e+00	0.0000000e+00	0.0000000e+00	0.0000000e+00	0.0000000e+00
11	0.0000000e+00	0.0000000e+00	0.0000000e+00	0.0000000e+00	0.0000000e+00	0.0000000e+00	0.0000000e+00	0.0000000e+00	0.0000000e+00	0.0000000e+00	0.0000000e+00	0.0000000e+00	0.0000000e+00	0.0000000e+00	0.0000000e+00	0.0000000e+00	0.0000000e+00	0.0000000e+00	0.0000000e+00	0.0000000e+00
12	0.0000000e+00	0.0000000e+00	0.0000000e+00	0.0000000e+00	0.0000000e+00	0.0000000e+00	0.0000000e+00	0.0000000e+00	0.0000000e+00	0.0000000e+00	0.0000000e+00	0.0000000e+00	0.0000000e+00	0.0000000e+00	0.0000000e+00	0.0000000e+00	0.0000000e+00	0.0000000e+00	0.0000000e+00	0.0000000e+00
13	0.0000000e+00	0.0000000e+00	0.0000000e+00	0.0000000e+00	0.0000000e+00	0.0000000e+00	0.0000000e+00	0.0000000e+00	0.0000000e+00	0.0000000e+00	0.0000000e+00	0.0000000e+00	0.0000000e+00	0.0000000e+00	0.0000000e+00	0.0000000e+00	0.0000000e+00	0.0000000e+00	0.0000000e+00	0.0000000e+00
14	0.0000000e+00	0.0000000e+00	0.0000000e+00	0.0000000e+00	0.0000000e+00	0.0000000e+00	0.0000000e+00	0.0000000e+00	0.0000000e+00	0.0000000e+00	0.0000000e+00	0.0000000e+00	0.0000000e+00	0.0000000e+00	0.0000000e+00	0.0000000e+00	0.0000000e+00	0.0000000e+00	0.0000000e+00	0.0000000e+00
15	0.0000000e+00	0.0000000e+00	0.0000000e+00	0.0000000e+00	0.0000000e+00	0.0000000e+00	0.0000000e+00	0.0000000e+00	0.0000000e+00	0.0000000e+00	0.0000000e+00	0.0000000e+00	0.0000000e+00	0.0000000e+00	0.0000000e+00	0.0000000e+00	0.0000000e+00	0.0000000e+00	0.0000000e+00	0.0000000e+00
16	0.0000000e+00	0.0000000e+00	0.0000000e+00	0.0000000e+00	0.0000000e+00	0.0000000e+00	0.0000000e+00	0.0000000e+00	0.0000000e+00	0.0000000e+00	0.0000000e+00	0.0000000e+00	0.0000000e+00	0.0000000e+00	0.0000000e+00	0.0000000e+00	0.0000000e+00	0.0000000e+00	0.0000000e+00	0.0000000e+00
17	0.0000000e+00	0.0000000e+00	0.0000000e+00	0.0000000e+00	0.0000000e+00	0.0000000e+00	0.0000000e+00	0.0000000e+00	0.0000000e+00	0.0000000e+00	0.0000000e+00	0.0000000e+00	0.0000000e+00	0.0000000e+00	0.0000000e+00	0.0000000e+00	0.0000000e+00	0.0000000e+00	0.0000000e+00	0.0000000e+00
18	0.0000000e+00	0.0000000e+00	0.0000000e+00	0.0000000e+00	0.0000000e+00	0.0000000e+00	0.0000000e+00	0.0000000e+00	0.0000000e+00	0.0000000e+00	0.0000000e+00	0.0000000e+00	0.0000000e+00	0.0000000e+00	0.0000000e+00	0.0000000e+00	0.0000000e+00	0.0000000e+00	0.0000000e+00	0.0000000e+00
19	7.0085561e-06	7.0190951e-06	7.0225609e-06	7.0276183e-06	1.7523156e-06	1.7549507e-06	1.7558172e-06	1.7570817e-06	4.3808123e-07	4.3873999e-07	4.3895663e-07	4.3927275e-07	1.0952032e-07	1.0968501e-07	1.0973917e-07	1.0981820e-07	2.7380078e-08	2.7421250e-08	2.7434790e-08	2.7454547e-08
20	1.6468418e-05	1.6499099e-05	1.6508245e-05	1.6518804e-05	4.1180804e-06	4.1257524e-06	4.1280394e-06	4.1306799e-06	1.0295330e-06	1.0314510e-06	1.0320227e-06	1.0326828e-06	2.5738329e-07	2.5786279e-07	2.5800573e-07	2.5817076e-07	6.4345813e-08	6.4465689e-08	6.4501424e-08	6.4542682e-08
21	2.8483185e-05	2.8547217e-05	2.8567074e-05	2.8583334e-05	7.1237176e-06	7.1397322e-06	7.1446985e-06	7.1487651e-06	1.7809678e-06	1.7849716e-06	1.7862132e-06	1.7872299e-06	4.4524211e-07	4.4624305e-07	4.4655345e-07	4.4680762e-07	1.1131050e-07	1.1156074e-07	1.1163834e-07	1.1170188e-07
22	4.3475273e-05	4.3590440e-05	4.3629561e-05	4.3652638e-05	1.0875631e-05	1.0904440e-05	1.0914227e-05	1.0920000e-05	2.7189974e-06	2.7262000e-06	2.7286467e-06	2.7300900e-06	6.7974969e-07	6.8155035e-07	6.8216203e-07	6.8252285e-07	1.6993736e-07	1.7038753e-07	1.7054045e-07	1.7063065e-07
23	6.1982530e-05	6.2171936e-05	6.2245002e-05	6.2275733e-05	1.5509494e-05	1.5556888e-05	1.5575170e-05	1.5582860e-05	3.8775560e-06	3.8894050e-06	3.8939759e-06	3.8958984e-06	9.6938970e-07	9.7235196e-07	9.7349469e-07	9.7397532e-07	2.4234730e-07	2.4308787e-07	2.4337355e-07	2.4349371e-07
24	8.4826938e-05	8.5120734e-05	8.5248733e-05	8.5290827e-05	2.1232727e-05	2.1306266e-05	2.1338305e-05	2.1348841e-05	5.3085241e-06	5.3269101e-06	5.3349203e-06	5.3375546e-06	1.3271324e-06	1.3317289e-06	1.3337314e-06	1.3343900e-06	3.3178286e-07	3.3293198e-07	3.3343263e-07	3.3359727e-07
25	1.1271484e-04	1.1314671e-04	1.1335750e-04	1.1342034e-04	2.8224662e-05	2.8332804e-05	2.8385588e-05	2.8401323e-05	7.0567712e-06	7.0838090e-06	7.0970061e-06	7.1009402e-06	1.7641952e-06	1.7709546e-06	1.7742539e-06	1.7752374e-06	4.4104838e-07	4.4273825e-07	4.4356307e-07	4.4380895e-07
26	1.4690459e-04	1.4751193e-04	1.4784355e-04	1.4794639e-04	3.6804314e-05	3.6956473e-05	3.7039553e-05	3.7065318e-05	9.2021093e-06	9.2401533e-06	9.2609257e-06	9.2673675e-06	2.3005314e-06	2.3100424e-06	2.3152355e-06	2.3168459e-06	5.7513215e-07	5.7750989e-07	5.7880817e-07	5.7921079e-07
27	1.8836829e-04	1.8919178e-04	1.8969295e-04	1.8986319e-04	4.7220788e-05	4.7427223e-05	4.7552858e-05	4.7595536e-05	1.1806896e-05	1.1858512e-05	1.1889925e-05	1.1900596e-05	2.9517305e-06	2.9646346e-06	2.9724879e-06	2.9751557e-06	7.3793149e-07	7.4115750e-07	7.4312083e-07	7.4378777e-07
28	2.3903936e-04	2.4013032e-04	2.4086411e-04	2.4114718e-04	5.9967471e-05	6.0241161e-05	6.0425245e-05	6.0496258e-05	1.4994610e-05	1.5063045e-05	1.5109074e-05	1.5126831e-05	3.7486632e-06	3.7657719e-06	3.7772794e-06	3.7817185e-06	9.3716395e-07	9.4144113e-07	9.4431799e-07	9.4542777e-07
29	3.0075395e-04	3.0216618e-04	3.0321272e-04	3.0366868e-04	7.5517791e-05	7.5872395e-05	7.6135177e-05	7.6249665e-05	1.8883801e-05	1.8972472e-05	1.9038183e-05	1.9066811e-05	4.7209672e-06	4.7431351e-06	4.7595629e-06	4.7667200e-06	1.1802389e-06	1.1857808e-06	1.1898878e-06	1.1916770e-06
30	3.7575993e-04	3.7757015e-04	3.7901681e-04	3.7972291e-04	9.4455106e-05	9.4910145e-05	9.5273791e-05	9.5451285e-05	2.3620594e-05	2.3734386e-05	2.3825324e-05	2.3869710e-05	5.9051751e-06	5.9336233e-06	5.9563578e-06	5.9674545e-06	1.4762892e-06	1.4834012e-06	1.4890848e-06	1.4918590e-06
31	4.6668462e-04	4.6899710e-04	4.7093605e-04	4.7199475e-04	1.1746763e-04	1.1804970e-04	1.1853775e-04	1.1880423e-04	2.9377464e-05	2.9523032e-05	2.9645088e-05	2.9711732e-05	7.3444072e-06	7.3807995e-06	7.4113137e-06	7.4279748e-06	1.8360947e-06	1.8451928e-06	1.8528213e-06	1.8569865e-06
32	5.7698466e-04	5.7993219e-04	5.8246747e-04	5.8401043e-04	1.4546693e-04	1.4621005e-04	1.4684923e-04	1.4723824e-04	3.6382939e-05	3.6568801e-05	3.6728668e-05	3.6825963e-05	9.0957980e-06	9.1422639e-06	9.1822311e-06	9.2065548e-06	2.2739386e-06	2.2855550e-06	2.2955468e-06	2.3016277e-06
33	7.1049820e-04	7.1423711e-04	7.1749686e-04	7.1968938e-04	1.7948138e-04	1.8042588e-04	1.8124933e-04	1.8180320e-04	4.4895046e-05	4.5131300e-05	4.5337278e-05	4.5475819e-05	1.1223858e-05	1.1282922e-05	1.1334417e-05	1.1369053e-05	2.8059479e-06	2.8207139e-06	2.8335875e-06	2.8422464e-06
34	8.7207821e-04	8.7682441e-04	8.8094164e-04	8.8399277e-04	2.2082693e-04	2.2202876e-04	2.2307132e-04	2.2384393e-04	5.5244173e-05	5.5544834e-05	5.5805652e-05	5.5998934e-05	1.3811190e-05	1.3886356e-05	1.3951561e-05	1.3999882e-05	3.4527723e-06	3.4715636e-06	3.4878648e-06	3.4999449e-06
35	1.0678660e-03	1.0738926e-03	1.0790661e-03	1.0832005e-03	2.7119335e-04	2.7272386e-04	2.7403771e-04	2.7508767e-04	6.7854880e-05	6.8237827e-05	6.8566563e-05	6.8829275e-05	1.6963941e-05	1.7059679e-05	1.7141864e-05	1.7207543e-05	4.2409473e-06	4.2648816e-06	4.2854277e-06	4.3018472e-06
36	1.3032684e-03	1.3109001e-03	1.3173958e-03	1.3228422e-03	3.3214307e-04	3.3408804e-04	3.3574349e-04	3.3713154e-04	8.3120706e-05	8.3607447e-05	8.4021732e-05	8.4369100e-05	2.0780509e-05	2.0902196e-05	2.1005769e-05	2.1092612e-05	5.1950701e-06	5.2254915e-06	5.2513845e-06	5.2730951e-06
37	1.5872914e-03	1.5969572e-03	1.6051153e-03	1.6121324e-03	4.0625913e-04	4.0873304e-04	4.1082105e-04	4.1261704e-04	1.0169206e-04	1.0231131e-04	1.0283397e-04	1.0328352e-04	2.5423512e-05	2.5578328e-05	2.5708995e-05	2.5821387e-05	6.3557924e-06	6.3944959e-06	6.4271622e-06	6.4552598e-06
38	1.9268543e-03	1.9391194e-03	1.9493238e-03	1.9582204e-03	4.9571017e-04	4.9886553e-04	5.0149075e-04	5.0377953e-04	1.2411735e-04	1.2490740e-04	1.2556471e-04	1.2613778e-04	3.1030080e-05	3.1227597e-05	3.1391928e-05	3.1535200e-05	7.7573923e-06	7.8067707e-06	7.8478529e-06	7.8836702e-06
39	2.3340573e-03	2.3496333e-03	2.3624209e-03	2.3735139e-03	6.0421011e-04	6.0824220e-04	6.1155250e-04	6.1442412e-04	1.5133503e-04	1.5234493e-04	1.5317406e-04	1.5389330e-04	3.7834862e-05	3.8087346e-05	3.8294633e-05	3.8474450e-05	9.4585255e-06	9.5216453e-06	9.5734659e-06	9.6184193e-06
40	2.8186338e-03	2.8383883e-03	2.8544071e-03	2.8681582e-03	7.3511257e-04	7.4026465e-04	7.4444241e-04	7.4802877e-04	1.8419713e-04	1.8548808e-04	1.8653490e-04	1.8743354e-04	4.6050922e-05	4.6373672e-05	4.6635387e-05	4.6860054e-05	1.1512449e-05	1.1593134e-05	1.1658561e-05	1.1714727e-05
41	3.3931295e-03	3.4181585e-03	3.4381747e-03	3.4552112e-03	8.9288448e-04	8.9947073e-04	9.0473789e-04	9.0922097e-04	2.2384056e-04	2.2549169e-04	2.2681214e-04	2.2793602e-04	5.5962567e-05	5.6375368e-05	5.6705493e-05	5.6986475e-05	1.3990225e-05	1.4093422e-05	1.4175951e-05	1.4246194e-05
42	4.0717723e-03	4.1034814e-03	4.1284695e-03	4.1495598e-03	1.0829726e-03	1.0914063e-03	1.0980524e-03	1.1036618e-03	2.7165653e-04	2.7377207e-04	2.7543920e-04	2.7684629e-04	6.7917714e-05	6.8446627e-05	6.8863431e-05	6.9215220e-05	1.6978813e-05	1.7111037e-05	1.7215234e-05	1.7303178e-05
43	4.8658589e-03	4.9059915e-03	4.9372198e-03	4.9632013e-03	1.3106911e-03	1.3215014e-03	1.3299132e-03	1.3369117e-03	3.2901410e-04	3.3172774e-04	3.3383930e-04	3.3559609e-04	8.2258786e-05	8.2937240e-05	8.3465163e-05	8.3904388e-05	2.0563792e-05	2.0733398e-05	2.0865373e-05	2.0975175e-05
44	5.7890954e-03	5.8398543e-03	5.8788255e-03	5.9108204e-03	1.5829322e-03	1.5968114e-03	1.6074674e-03	1.6162159e-03	3.9769502e-04	4.0118202e-04	4.0385923e-04	4.0605720e-04	9.9431458e-05	1.0030327e-04	1.0097263e-04	1.0152216e-04	2.4856541e-05	2.5074483e-05	2.5241813e-05	2.5379189e-05
45	6.8531376e-03	6.9174224e-03	6.9659035e-03	7.0052163e-03	1.9071908e-03	1.9250809e-03	1.9385729e-03	1.9495134e-03	4.7965487e-04	4.8415420e-04	4.8754742e-04	4.9029894e-04	1.1992495e-04	1.2104988e-04	1.2189827e-04	1.2258621e-04	2.9979307e-05	3.0260523e-05	3.0472605e-05	3.0644581e-05
46	8.0673523e-03	8.1488871e-03	8.2089964e-03	8.2570669e-03	2.2917728e-03	2.3149352e-03	2.3320110e-03	2.3456669e-03	5.7708361e-04	5.8291605e-04	5.8721586e-04	5.9065450e-04	1.4428719e-04	1.4574547e-04	1.4682054e-04	1.4768030e-04	3.6068998e-05	3.6433539e-05	3.6702286e-05	3.6917209e-05
47	9.4391296e-03	9.5424260e-03	9.6167382e-03	9.6752992e-03	2.7462452e-03	2.7762986e-03	2.7979192e-03	2.8149570e-03	6.9253058e-04	7.0010924e-04	7.0556138e-04	7.0985788e-04	1.7315617e-04	1.7505109e-04	1.7641431e-04	1.7748858e-04	4.3284999e-05	4.3758685e-05	4.4099458e-05	4.4368001e-05
48	1.0967876e-02	1.1098364e-02	1.1189901e-02	1.1261128e-02	3.2797601e-03	3.3187803e-03	3.3461529e-03	3.3674523e-03	8.2849239e-04	8.3834919e-04	8.4526372e-04	8.5064411e-04	2.0715686e-04	2.0962146e-04	2.1135038e-04	2.1269569e-04	5.1783412e-05	5.2399493e-05	5.2831673e-05	5.3167964e-05
49	1.2650820e-02	1.2815239e-02	1.2927604e-02	1.3013874e-02	3.9031978e-03	3.9539266e-03	3.9885946e-03	4.0152118e-03	9.8797403e-04	1.0008144e-03	1.0095896e-03	1.0163269e-03	2.4704167e-04	2.5025240e-04	2.5244661e-04	2.5413127e-04	6.1752139e-05	6.2554714e-05	6.3103194e-05	6.3524303e-05
50	1.4475520e-02	1.4681562e-02	1.4819280e-02	1.4923141e-02	4.6266082e-03	4.6924625e-03	4.7364793e-03	4.7696752e-03	1.1738561e-03	1.1905645e-03	1.2017324e-03	1.2101548e-03	2.9353224e-04	2.9771032e-04	3.0050295e-04	3.0260904e-04	7.3371334e-05	7.4415688e-05	7.5113732e-05	7.5640171e-05
51	1.6425561e-02	1.6682075e-02	1.6850677e-02	1.6974974e-02	5.4611452e-03	5.5464309e-03	5.6024873e-03	5.6438133e-03	1.3894119e-03	1.4111101e-03	1.4253718e-03	1.4358859e-03	3.4744891e-04	3.5287495e-04	3.5644137e-04	3.5907061e-04	8.6845737e-05	8.8201990e-05	8.9093426e-05	8.9750612e-05
52	1.8479584e-02	1.8796989e-02	1.9002692e-02	1.9150677e-02	6.4186308e-03	6.5288770e-03	6.6003253e-03	6.6517257e-03	1.6382280e-03	1.6663662e-03	1.6846019e-03	1.6977209e-03	4.0969093e-04	4.1672777e-04	4.2128820e-04	4.2456900e-04	1.0239971e-04	1.0415853e-04	1.0529838e-04	1.0611839e-04
53	2.0602479e-02	2.0991629e-02	2.1241372e-02	2.1416567e-02	7.5063379e-03	7.6481213e-03	7.7391131e-03	7.8029437e-03	1.9228716e-03	1.9591918e-03	1.9825008e-03	1.9988521e-03	4.8090325e-04	4.8998679e-04	4.9581629e-04	4.9990568e-04	1.2019395e-04	1.2246424e-04	1.2392123e-04	1.2494330e-04
54	2.2764664e-02	2.3236864e-02	2.3538867e-02	2.3745256e-02	8.7350110e-03	8.9161987e-03	9.0320800e-03	9.1112734e-03	2.2470044e-03	2.2936133e-03	2.3234227e-03	2.3437945e-03	5.6200544e-04	5.7366295e-04	5.8111868e-04	5.8621394e-04	1.4045764e-04	1.4337111e-04	1.4523446e-04	1.4650788e-04
55	2.4930046e-02	2.5496904e-02	2.5859823e-02	2.6102396e-02	1.0111951e-02	1.0341876e-02	1.0489080e-02	1.0587471e-02	2.6136112e-03	2.6730393e-03	2.7110869e-03	2.7365178e-03	6.5374877e-04	6.6861368e-04	6.7813061e-04	6.8449170e-04	1.6337772e-04	1.6709259e-04	1.6947096e-04	1.7106065e-04
56	2.7068575e-02	2.7741581e-02	2.8174815e-02	2.8459571e-02	1.1646905e-02	1.1936482e-02	1.2122892e-02	1.2245415e-02	3.0265928e-03	3.1018430e-03	3.1502839e-03	3.1821230e-03	7.5711489e-04	7.7593904e-04	7.8805673e-04	7.9602142e-04	1.8919850e-04	1.9390254e-04	1.9693068e-04	1.9892101e-04
57	2.9146103e-02	2.9936009e-02	3.0450189e-02	3.0783419e-02	1.3344535e-02	1.3706193e-02	1.3941610e-02	1.4094179e-02	3.4887958e-03	3.5833478e-03	3.6448953e-03	3.6847829e-03	8.7282302e-04	8.9647793e-04	9.1187581e-04	9.2185486e-04	2.1809847e-04	2.2400929e-04	2.2785687e-04	2.3035040e-04
58	3.1133925e-02	3.2052158e-02	3.2657576e-02	3.3046111e-02	1.5209229e-02	1.5657795e-02	1.5953547e-02	1.6143351e-02	4.0033247e-03	4.1213947e-03	4.1992417e-03	4.2492012e-03	1.0016586e-03	1.0312005e-03	1.0506783e-03	1.0631785e-03	2.5027240e-04	2.5765368e-04	2.6252037e-04	2.6564365e-04
59	3.3008616e-02	3.4065607e-02	3.4772220e-02	3.5224145e-02	1.7244135e-02	1.7796322e-02	1.8165465e-02	1.8401557e-02	4.5733140e-03	4.7197592e-03	4.8176598e-03	4.8802735e-03	1.1444164e-03	1.1810625e-03	1.2055610e-03	1.2212293e-03	2.8591706e-04	2.9507261e-04	3.0119321e-04	3.0510773e-04
60	3.4748271e-02	3.5951662e-02	3.6769129e-02	3.7292494e-02	1.9445501e-02	2.0118931e-02	2.0576394e-02	2.0869275e-02	5.2003394e-03	5.3804358e-03	5.5027759e-03	5.5811015e-03	1.3015028e-03	1.3465760e-03	1.3771944e-03	1.3967971e-03	3.2513191e-04	3.3639177e-04	3.4404063e-04	3.4893764e-04
61	3.6345248e-02	3.7702402e-02	3.8639797e-02	3.9243227e-02	2.1819453e-02	2.2634205e-02	2.3196959e-02	2.3559221e-02	5.8892258e-03	6.1091332e-03	6.2610246e-03	6.3588018e-03	1.4741406e-03	1.5291859e-03	1.5672061e-03	1.5916808e-03	3.6821978e-04	3.8196934e-04	3.9146625e-04	3.9757970e-04
62	3.7785723e-02	3.9303270e-02	4.0368452e-02	4.1061819e-02	2.4357375e-02	2.5335614e-02	2.6022250e-02	2.6469207e-02	6.6410676e-03	6.9077855e-03	7.0949976e-03	7.2168611e-03	1.6626207e-03	1.7293947e-03	1.7762641e-03	1.8067731e-03	4.1525043e-04	4.3192768e-04	4.4363362e-04	4.5125345e-04
63	3.9061416e-02	4.0746539e-02	4.1948277e-02	4.2740617e-02	2.7049627e-02	2.8216558e-02	2.9048749e-02	2.9597436e-02	7.4570762e-03	7.7787771e-03	8.0081967e-03	8.1594595e-03	1.8672662e-03	1.9478207e-03	2.0052678e-03	2.0431443e-03	4.6630115e-04	4.8641755e-04	5.0076347e-04	5.1022214e-04
64	4.0173699e-02	4.2033179e-02	4.3379152e-02	4.4278953e-02	2.9892617e-02	3.1276226e-02	3.2277743e-02	3.2947271e-02	8.3407389e-03	8.7267983e-03	9.0062450e-03	9.1930589e-03	2.0889741e-03	2.1856643e-03	2.2556529e-03	2.3024413e-03	5.2159186e-04	5.4573425e-04	5.6320958e-04	5.7489206e-04
65	4.1116086e-02	4.3158544e-02	4.4653197e-02	4.5668519e-02	3.2858051e-02	3.4490288e-02	3.5684744e-02	3.6496142e-02	9.2883499e-03	9.7497526e-03	1.0087403e-02	1.0316770e-02	2.3268402e-03	2.4424270e-03	2.5270123e-03	2.5844714e-03	5.8089265e-04	6.0974874e-04	6.3086536e-04	6.4520994e-04
66	4.1897086e-02	4.4131494e-02	4.5779392e-02	4.6917606e-02	3.5942949e-02	3.7859818e-02	3.9273528e-02	4.0249986e-02	1.0304463e-02	1.0854009e-02	1.1259304e-02	1.1539244e-02	2.5820365e-03	2.7197388e-03	2.8212955e-03	2.8914414e-03	6.4449075e-04	6.7886201e-04	7.0421114e-04	7.2171995e-04
67	4.2513792e-02	4.4951577e-02	4.6756918e-02	4.8024106e-02	3.9113868e-02	4.1356698e-02	4.3017661e-02	4.4183510e-02	1.1384322e-02	1.2037111e-02	1.2520544e-02	1.2859871e-02	2.8534023e-03	3.0170194e-03	3.1381886e-03	3.2232386e-03	7.1209114e-04	7.5292318e-04	7.8316200e-04	8.0438696e-04
68	4.2969292e-02	4.5622221e-02	4.7590380e-02	4.8993964e-02	4.2344012e-02	4.4958337e-02	4.6897856e-02	4.8281015e-02	1.2525312e-02	1.3298627e-02	1.3872334e-02	1.4281471e-02	3.1403170e-03	3.3342006e-03	3.4780392e-03	3.5806170e-03	7.8353289e-04	8.3190831e-04	8.6779714e-04	8.9339108e-04
69	4.3262160e-02	4.6146090e-02	4.8282007e-02	4.9828078e-02	4.5583647e-02	4.8622331e-02	5.0872863e-02	5.2501898e-02	1.3716657e-02	1.4631033e-02	1.5308245e-02	1.5798441e-02	3.4401107e-03	3.6694344e-03	3.8392778e-03	3.9622179e-03	8.5814439e-04	9.1534977e-04	9.5771763e-04	9.8838536e-04
70	4.3402353e-02	4.6536594e-02	4.8848319e-02	5.0540018e-02	4.8824018e-02	5.2349777e-02	5.4950274e-02	5.6853294e-02	1.4961876e-02	1.6042328e-02	1.6839237e-02	1.7422408e-02	3.7537114e-03	4.0247806e-03	4.2247132e-03	4.3710221e-03	9.3614931e-04	1.0037520e-03	1.0536139e-03	1.0901023e-03
71	4.3387118e-02	4.6794053e-02	4.9289621e-02	5.1130127e-02	5.1999570e-02	5.6082790e-02	5.9073735e-02	6.1279586e-02	1.6243465e-02	1.7518968e-02	1.8453270e-02	1.9142327e-02	4.0767596e-03	4.3968836e-03	4.6313732e-03	4.8043116e-03	1.0164549e-03	1.0962711e-03	1.1547362e-03	1.1978548e-03
72	4.3218629e-02	4.6924090e-02	4.9614766e-02	5.1607389e-02	5.5074736e-02	5.9796712e-02	6.3225517e-02	6.5764774e-02	1.7554219e-02	1.9059275e-02	2.0152153e-02	2.0961502e-02	4.4074888e-03	4.7853763e-03	5.0597747e-03	5.2629848e-03	1.0986135e-03	1.1928060e-03	1.2612027e-03	1.3118550e-03
73	4.2899742e-02	4.6931308e-02	4.9828853e-02	5.1978488e-02	5.8010963e-02	6.3462628e-02	6.7380819e-02	7.0287652e-02	1.8885045e-02	2.0659795e-02	2.1935334e-02	2.2881632e-02	4.7436582e-03	5.1894504e-03	5.5098477e-03	5.7475446e-03	1.1820594e-03	1.2931452e-03	1.3729841e-03	1.4322152e-03
74	4.2434728e-02	4.6816897e-02	3.8155616e-02	1.7680088e-02	6.0761204e-02	6.7035921e-02	7.1504651e-02	7.4814314e-02	2.0221803e-02	2.2310077e-02	2.3797306e-02	2.4898787e-02	5.0817512e-03	5.6065359e-03	5.9802772e-03	6.2570803e-03	1.2659101e-03	1.3966387e-03	1.4897410e-03	1.5586951e-03
75	4.1828729e-02	2.0417328e-02	0.0000000e+00	0.0000000e+00	6.3277565e-02	7.0468308e-02	7.5557081e-02	7.9310410e-02	2.1547840e-02	2.3996496e-02	2.5729370e-02	2.7007487e-02	5.4176131e-03	6.0332604e-03	6.4689440e-03	6.7902915e-03	1.3491254e-03	1.5024375e-03	1.6109340e-03	1.6909578e-03
76	2.3552682e-02	0.0000000e+00	0.0000000e+00	0.0000000e+00	6.5535125e-02	7.3735746e-02	7.9525781e-02	8.3766960e-02	2.2855381e-02	2.5715349e-02	2.7734624e-02	2.9213736e-02	5.7493295e-03	6.4687617e-03	6.9767154e-03	7.3487898e-03	1.4312218e-03	1.6103151e-03	1.7367637e-03	1.8293869e-03
77	0.0000000e+00	0.0000000e+00	0.0000000e+00	0.0000000e+00	6.7459054e-02	7.6766066e-02	5.4233429e-02	2.3888927e-02	2.4112558e-02	2.7439255e-02	2.9791831e-02	3.1500125e-02	6.0688920e-03	6.9061888e-03	7.4983088e-03	7.9282696e-03	1.5102039e-03	1.7185597e-03	1.8659049e-03	1.9728978e-03
78	0.0000000e+00	0.0000000e+00	0.0000000e+00	0.0000000e+00	6.9032858e-02	1.9529916e-02	0.0000000e+00	0.0000000e+00	2.5313976e-02	2.9172678e-02	3.1914223e-02	3.3884611e-02	6.3749895e-03	7.3467523e-03	8.0371741e-03	8.5333903e-03	1.5857377e-03	1.8274575e-03	1.9991955e-03	2.1226261e-03
79	0.0000000e+00	0.0000000e+00	0.0000000e+00	0.0000000e+00	1.8404998e-02	0.0000000e+00	0.0000000e+00	0.0000000e+00	2.6420754e-02	3.0882597e-02	3.4071796e-02	3.6343081e-02	6.6578117e-03	7.7821593e-03	8.5858110e-03	9.1581559e-03	1.6553859e-03	1.9349416e-03	2.1347601e-03	2.2770669e-03
80	0.0000000e+00	0.0000000e+00	0.0000000e+00	0.0000000e+00	0.0000000e+00	0.0000000e+00	0.0000000e+00	0.0000000e+00	2.7410677e-02	3.2554937e-02	3.6254419e-02	3.8872482e-02	6.9117531e-03	8.2089067e-03	9.1417513e-03	9.8019104e-03	1.7177560e-03	2.0401335e-03	2.2719704e-03	2.4360376e-03
81	0.0000000e+00	0.0000000e+00	0.0000000e+00	0.0000000e+00	0.0000000e+00	0.0000000e+00	0.0000000e+00	0.0000000e+00	2.8255783e-02	3.4169235e-02	3.8444942e-02	4.1463797e-02	7.1297325e-03	8.6218634e-03	9.7007450e-03	1.0462487e-02	1.7710933e-03	2.1417529e-03	2.4097573e-03	2.5989813e-03
82	0.0000000e+00	0.0000000e+00	0.0000000e+00	0.0000000e+00	0.0000000e+00	0.0000000e+00	0.0000000e+00	0.0000000e+00	2.8934200e-02	3.5712450e-02	4.0639531e-02	4.4123867e-02	7.3062133e-03	9.0177981e-03	1.0261942e-02	1.1141776e-02	1.8140254e-03	2.2389868e-03	2.5478894e-03	2.7663393e-03
83	0.0000000e+00	0.0000000e+00	0.0000000e+00	0.0000000e+00	0.0000000e+00	0.0000000e+00	0.0000000e+00	0.0000000e+00	2.9401913e-02	3.7140836e-02	4.2802348e-02	4.6824762e-02	7.4299861e-03	9.3856441e-03	1.0816332e-02	1.1832813e-02	1.8437853e-03	2.3290908e-03	2.6841226e-03	2.9363669e-03
84	0.0000000e+00	0.0000000e+00	0.0000000e+00	0.0000000e+00	0.0000000e+00	0.0000000e+00	0.0000000e+00	0.0000000e+00	2.9627874e-02	3.8416878e-02	4.4904584e-02	4.9541812e-02	7.4930843e-03	9.7158812e-03	1.1356665e-02	1.2529450e-02	1.8584166e-03	2.4097093e-03	2.8166524e-03	3.1075238e-03
85	0.0000000e+00	0.0000000e+00	0.0000000e+00	0.0000000e+00	0.0000000e+00	0.0000000e+00	0.0000000e+00	0.0000000e+00	2.9610030e-02	3.9534179e-02	4.6953701e-02	5.2289431e-02	7.4949136e-03	1.0006922e-02	1.1884957e-02	1.3235541e-02	1.8577847e-03	2.4804430e-03	2.9459567e-03	3.2807296e-03
86	0.0000000e+00	0.0000000e+00	0.0000000e+00	0.0000000e+00	0.0000000e+00	0.0000000e+00	0.0000000e+00	0.0000000e+00	2.9317672e-02	4.0446610e-02	4.8911393e-02	5.5031833e-02	7.4275212e-03	1.0246995e-02	1.2391516e-02	1.3942106e-02	1.8399489e-03	2.5383904e-03	3.0696320e-03	3.4537449e-03
87	0.0000000e+00	0.0000000e+00	0.0000000e+00	0.0000000e+00	0.0000000e+00	0.0000000e+00	0.0000000e+00	0.0000000e+00	2.8726286e-02	4.1103376e-02	5.0732429e-02	5.7731746e-02	7.2844885e-03	1.0423104e-02	1.2864865e-02	1.4639771e-02	1.8033548e-03	2.5803534e-03	3.1848381e-03	3.6242354e-03
88	0.0000000e+00	0.0000000e+00	0.0000000e+00	0.0000000e+00	0.0000000e+00	0.0000000e+00	0.0000000e+00	0.0000000e+00	2.7833729e-02	4.1482458e-02	5.2401119e-02	6.0388812e-02	7.0650989e-03	1.0529587e-02	1.3301096e-02	1.5328630e-02	1.7478545e-03	2.6049438e-03	3.2905951e-03	3.7921924e-03
89	0.0000000e+00	0.0000000e+00	0.0000000e+00	0.0000000e+00	0.0000000e+00	0.0000000e+00	0.0000000e+00	0.0000000e+00	2.6624278e-02	4.1541591e-02	5.3864757e-02	6.2961246e-02	6.7650824e-03	1.0555489e-02	1.3686738e-02	1.5998106e-02	1.6724392e-03	2.6094899e-03	3.3835858e-03	3.9549938e-03
90	0.0000000e+00	0.0000000e+00	0.0000000e+00	0.0000000e+00	0.0000000e+00	0.0000000e+00	0.0000000e+00	0.0000000e+00	2.5103489e-02	4.1255548e-02	5.5082829e-02	6.5420422e-02	6.3855645e-03	1.0494157e-02	1.4011397e-02	1.6640967e-02	1.5774360e-03	2.5923882e-03	3.4612574e-03	4.1108441e-03
91	0.0000000e+00	0.0000000e+00	0.0000000e+00	0.0000000e+00	0.0000000e+00	0.0000000e+00	0.0000000e+00	0.0000000e+00	2.3293907e-02	4.0600084e-02	5.6011805e-02	2.7471978e-02	5.9319782e-03	1.0339134e-02	1.4263851e-02	1.7249031e-02	1.4642386e-03	2.5520928e-03	3.5208628e-03	4.2577191e-03
92	0.0000000e+00	0.0000000e+00	0.0000000e+00	0.0000000e+00	0.0000000e+00	0.0000000e+00	0.0000000e+00	0.0000000e+00	2.1240995e-02	3.9560375e-02	5.0650358e-02	0.0000000e+00	5.4156189e-03	1.0086340e-02	1.4432170e-02	1.7813112e-02	1.3356835e-03	2.4876489e-03	3.5594843e-03	4.3933444e-03
93	0.0000000e+00	0.0000000e+00	0.0000000e+00	0.0000000e+00	0.0000000e+00	0.0000000e+00	0.0000000e+00	0.0000000e+00	1.8997763e-02	3.8109080e-02	0.0000000e+00	0.0000000e+00	4.8496902e-03	9.7283683e-03	1.4498834e-02	1.8315095e-02	1.1950802e-03	2.3973036e-03	3.5728611e-03	4.5132793e-03
94	0.0000000e+00	0.0000000e+00	0.0000000e+00	0.0000000e+00	0.0000000e+00	0.0000000e+00	0.0000000e+00	0.0000000e+00	1.6642694e-02	3.6254999e-02	0.0000000e+00	0.0000000e+00	4.2540192e-03	9.2670971e-03	1.4459358e-02	1.8748675e-02	1.0473502e-03	2.2815826e-03	3.5599303e-03	4.6159710e-03
95	0.0000000e+00	0.0000000e+00	0.0000000e+00	0.0000000e+00	0.0000000e+00	0.0000000e+00	0.0000000e+00	0.0000000e+00	1.4256125e-02	3.4007309e-02	0.0000000e+00	0.0000000e+00	3.6489458e-03	8.7043869e-03	1.4304954e-02	1.9099427e-02	8.9753485e-04	2.1410267e-03	3.5186038e-03	4.6979052e-03
96	0.0000000e+00	0.0000000e+00	0.0000000e+00	0.0000000e+00	0.0000000e+00	0.0000000e+00	0.0000000e+00	0.0000000e+00	1.1923601e-02	2.7296214e-02	0.0000000e+00	0.0000000e+00	3.0562849e-03	8.0515777e-03	1.4033487e-02	1.9360574e-02	7.5101386e-04	1.9784956e-03	3.4484164e-03	4.7574292e-03
97	0.0000000e+00	0.0000000e+00	0.0000000e+00	0.0000000e+00	0.0000000e+00	0.0000000e+00	0.0000000e+00	0.0000000e+00	9.7271057e-03	0.0000000e+00	0.0000000e+00	0.0000000e+00	2.4969837e-03	7.3184434e-03	1.3630263e-02	1.9503038e-02	6.1294621e-04	1.7964923e-03	3.3458842e-03	4.7875014e-03
98	0.0000000e+00	0.0000000e+00	0.0000000e+00	0.0000000e+00	0.0000000e+00	0.0000000e+00	0.0000000e+00	0.0000000e+00	7.7390369e-03	0.0000000e+00	0.0000000e+00	0.0000000e+00	1.9897118e-03	6.5258307e-03	1.3090668e-02	1.9509893e-02	4.8790075e-04	1.6002105e-03	3.2099858e-03	4.7840554e-03
99	0.0000000e+00	0.0000000e+00	0.0000000e+00	0.0000000e+00	0.0000000e+00	0.0000000e+00	0.0000000e+00	0.0000000e+00	6.0110555e-03	0.0000000e+00	0.0000000e+00	0.0000000e+00	1.5479685e-03	5.7037596e-03	1.2425260e-02	1.9387007e-02	3.7915102e-04	1.3970480e-03	3.0433759e-03	4.7485485e-03
100	0.0000000e+00	0.0000000e+00	0.0000000e+00	0.0000000e+00	0.0000000e+00	0.0000000e+00	0.0000000e+00	0.0000000e+00	4.5593669e-03	0.0000000e+00	0.0000000e+00	0.0000000e+00	1.1761197e-03	4.8744357e-03	1.1627735e-02	1.9109239e-02	2.8773396e-04	1.1925153e-03	2.8446886e-03	4.6750150e-03
101	0.0000000e+00	0.0000000e+00	0.0000000e+00	0.0000000e+00	0.0000000e+00	0.0000000e+00	0.0000000e+00	0.0000000e+00	3.3807708e-03	0.0000000e+00	0.0000000e+00	0.0000000e+00	8.7363611e-04	4.0670969e-03	1.0714494e-02	1.8674813e-02	2.1347007e-04	9.9378155e-04	2.6180508e-03	4.5631282e-03
102	0.0000000e+00	0.0000000e+00	0.0000000e+00	0.0000000e+00	0.0000000e+00	0.0000000e+00	0.0000000e+00	0.0000000e+00	2.4482141e-03	0.0000000e+00	0.0000000e+00	0.0000000e+00	6.3382308e-04	3.3120991e-03	9.7074759e-03	1.8079726e-02	1.5467353e-04	8.0826033e-04	2.3689411e-03	4.4120437e-03
103	0.0000000e+00	0.0000000e+00	0.0000000e+00	0.0000000e+00	0.0000000e+00	0.0000000e+00	0.0000000e+00	0.0000000e+00	1.7265822e-03	0.0000000e+00	0.0000000e+00	0.0000000e+00	4.4786353e-04	2.6320749e-03	8.6326446e-03	1.7316889e-02	1.0914651e-04	6.4144941e-04	2.1038173e-03	4.2202097e-03
104	0.0000000e+00	0.0000000e+00	0.0000000e+00	0.0000000e+00	0.0000000e+00	0.0000000e+00	0.0000000e+00	0.0000000e+00	1.1828001e-03	0.0000000e+00	0.0000000e+00	0.0000000e+00	3.0742472e-04	2.0404225e-03	7.5182922e-03	1.6378098e-02	7.4816690e-05	4.9656924e-04	1.8296959e-03	3.9858704e-03
105	0.0000000e+00	0.0000000e+00	0.0000000e+00	0.0000000e+00	0.0000000e+00	0.0000000e+00	0.0000000e+00	0.0000000e+00	7.8587178e-04	0.0000000e+00	0.0000000e+00	0.0000000e+00	2.0468612e-04	1.5457427e-03	6.4063409e-03	1.5282022e-02	4.9741083e-05	3.7563328e-04	1.5568146e-03	3.7137072e-03
106	0.0000000e+00	0.0000000e+00	0.0000000e+00	0.0000000e+00	0.0000000e+00	0.0000000e+00	0.0000000e+00	0.0000000e+00	5.0474144e-04	0.0000000e+00	0.0000000e+00	0.0000000e+00	1.3175182e-04	1.1451821e-03	5.3312432e-03	1.4044802e-02	3.1968419e-05	2.7786835e-04	1.2935792e-03	3.4078477e-03
107	0.0000000e+00	0.0000000e+00	0.0000000e+00	0.0000000e+00	0.0000000e+00	0.0000000e+00	0.0000000e+00	0.0000000e+00	3.1153271e-04	0.0000000e+00	0.0000000e+00	0.0000000e+00	8.1503570e-05	8.2836138e-04	4.3286763e-03	1.2686976e-02	1.9744878e-05	2.0067703e-04	1.0486557e-03	3.0735192e-03
108	0.0000000e+00	0.0000000e+00	0.0000000e+00	0.0000000e+00	0.0000000e+00	0.0000000e+00	0.0000000e+00	0.0000000e+00	1.8550426e-04	0.0000000e+00	0.0000000e+00	0.0000000e+00	4.8647274e-05	5.8376729e-04	3.4307756e-03	1.1252212e-02	1.1765675e-05	1.4118810e-04	8.2975643e-04	2.7214242e-03
109	0.0000000e+00	0.0000000e+00	0.0000000e+00	0.0000000e+00	0.0000000e+00	0.0000000e+00	0.0000000e+00	0.0000000e+00	1.0464880e-04	0.0000000e+00	0.0000000e+00	0.0000000e+00	2.7511766e-05	3.9995229e-04	2.6545415e-03	9.7811205e-03	6.6423737e-06	9.6563508e-05	6.4090603e-04	2.3615299e-03
110	0.0000000e+00	0.0000000e+00	0.0000000e+00	0.0000000e+00	0.0000000e+00	0.0000000e+00	0.0000000e+00	0.0000000e+00	5.6302430e-05	0.0000000e+00	0.0000000e+00	0.0000000e+00	1.4839800e-05	2.6566861e-04	2.0062685e-03	8.3149931e-03	3.5764561e-06	6.4027288e-05	4.8351942e-04	2.0039494e-03
111	0.0000000e+00	0.0000000e+00	0.0000000e+00	0.0000000e+00	0.0000000e+00	0.0000000e+00	0.0000000e+00	0.0000000e+00	2.8823900e-05	0.0000000e+00	0.0000000e+00	0.0000000e+00	7.6176706e-06	1.7063582e-04	1.4831605e-03	6.9046566e-03	1.8324419e-06	4.1046698e-05	3.5677643e-04	1.6609253e-03
112	0.0000000e+00	0.0000000e+00	0.0000000e+00	0.0000000e+00	0.0000000e+00	0.0000000e+00	0.0000000e+00	0.0000000e+00	1.3605885e-05	0.0000000e+00	0.0000000e+00	0.0000000e+00	3.6058936e-06	1.0537223e-04	1.0709504e-03	5.5963469e-03	8.6570463e-07	2.5297813e-05	2.5711428e-04	1.3435736e-03
113	0.0000000e+00	0.0000000e+00	0.0000000e+00	0.0000000e+00	0.0000000e+00	0.0000000e+00	0.0000000e+00	0.0000000e+00	6.3387200e-06	0.0000000e+00	0.0000000e+00	0.0000000e+00	1.6848001e-06	6.2758803e-05	7.5310564e-04	4.4259698e-03	4.0366627e-07	1.5036569e-05	1.8043882e-04	1.0604313e-03
114	0.0000000e+00	0.0000000e+00	0.0000000e+00	0.0000000e+00	0.0000000e+00	0.0000000e+00	0.0000000e+00	0.0000000e+00	1.6605500e-06	0.0000000e+00	0.0000000e+00	0.0000000e+00	4.4270502e-07	3.5416401e-05	5.1486594e-04	3.4172400e-03	1.0584405e-07	8.4675244e-06	1.2309664e-04	8.1701026e-04
115	0.0000000e+00	0.0000000e+00	0.0000000e+00	0.0000000e+00	0.0000000e+00	0.0000000e+00	0.0000000e+00	0.0000000e+00	0.0000000e+00	0.0000000e+00	0.0000000e+00	0.0000000e+00	0.0000000e+00	1.9070994e-05	3.4141731e-04	2.5783054e-03	0.0000000e+00	4.5495164e-06	8.1447440e-05	6.1507242e-04
116	0.0000000e+00	0.0000000e+00	0.0000000e+00	0.0000000e+00	0.0000000e+00	0.0000000e+00	0.0000000e+00	0.0000000e+00	0.0000000e+00	0.0000000e+00	0.0000000e+00	0.0000000e+00	0.0000000e+00	9.7708591e-06	2.1886724e-04	1.9023863e-03	0.0000000e+00	2.3255512e-06	5.2092347e-05	4.5278482e-04
117	0.0000000e+00	0.0000000e+00	0.0000000e+00	0.0000000e+00	0.0000000e+00	0.0000000e+00	0.0000000e+00	0.0000000e+00	0.0000000e+00	0.0000000e+00	0.0000000e+00	0.0000000e+00	0.0000000e+00	4.6168149e-06	1.3491359e-04	1.3711940e-03	0.0000000e+00	1.0962130e-06	3.2033779e-05	3.2557525e-04
118	0.0000000e+00	0.0000000e+00	0.0000000e+00	0.0000000e+00	0.0000000e+00	0.0000000e+00	0.0000000e+00	0.0000000e+00	0.0000000e+00	0.0000000e+00	0.0000000e+00	0.0000000e+00	0.0000000e+00	2.1538957e-06	8.0232616e-05	9.6279139e-04	0.0000000e+00	5.1014549e-07	1.9002919e-05	2.2803503e-04
119	0.0000000e+00	0.0000000e+00	0.0000000e+00	0.0000000e+00	0.0000000e+00	0.0000000e+00	0.0000000e+00	0.0000000e+00	0.0000000e+00	0.0000000e+00	0.0000000e+00	0.0000000e+00	0.0000000e+00	5.6520758e-07	4.5216607e-05	6.5733642e-04	0.0000000e+00	1.3351944e-07	1.0681556e-05	1.5528311e-04
120	0.0000000e+00	0.0000000e+00	0.0000000e+00	0.0000000e+00	0.0000000e+00	0.0000000e+00	0.0000000e+00	0.0000000e+00	0.0000000e+00	0.0000000e+00	0.0000000e+00	0.0000000e+00	0.0000000e+00	0.0000000e+00	2.4317861e-05	4.3534902e-04	0.0000000e+00	0.0000000e+00	5.7290461e-06	1.0256390e-04
