# Supplementary material for: Quantifying the Potential for Future Gene Therapy to Lower Lifetime Risk of Polygenic Late-Onset Diseases
Source: MDPI journal article supplement (doi:10.3390/ijms20133352), 2019-07-08
Supplement: s2 [file s2 › SuppFiles/Results/LODsCommonLow/T2D/EnvironmentArray.csv]

Age	Env	Incidence	CasesExpected
0	0	-0.000109115	0
1	0	-0.000107483	0
2	0	-0.0001056	0
3	0	-0.000103429	0
4	0	-0.000100926	0
5	0	-9.8041e-05	0
6	0	-9.47143e-05	0
7	0	-9.08791e-05	0
8	0	-8.64578e-05	0
9	0	-8.13612e-05	0
10	0	-7.54864e-05	0
11	0	-6.8715e-05	0
12	0	-6.09108e-05	0
13	0	-5.1917e-05	0
14	0	-4.15534e-05	0
15	0	-2.96126e-05	0
16	0	-1.58566e-05	0
17	0	-1.15904e-08	0
18	4.4212e-07	1.82363e-05	455
19	1.03957e-06	3.92472e-05	981
20	1.79943e-06	6.34339e-05	1585
21	2.7491e-06	9.12689e-05	2281
22	3.92352e-06	0.000123293	3081
23	5.37602e-06	0.000160123	4001
24	7.15287e-06	0.000202463	5059
25	9.33594e-06	0.000251115	6273
26	1.19898e-05	0.00030699	7667
27	1.52416e-05	0.00037112	9266
28	1.92137e-05	0.000444672	11098
29	2.40576e-05	0.000528963	13196
30	2.99524e-05	0.00062547	15596
31	3.71353e-05	0.000735847	18336
32	4.58747e-05	0.000861931	21463
33	5.65152e-05	0.00100576	25022
34	6.95003e-05	0.00116956	29069
35	8.52437e-05	0.00135579	33658
36	0.000104427	0.00156706	38850
37	0.000127633	0.00180619	44708
38	0.00015585	0.00207613	51297
39	0.000189986	0.00237996	58682
40	0.000231251	0.00272078	66926
41	0.000281135	0.00310166	76088
42	0.000341124	0.00352551	86217
43	0.000413151	0.00399498	97354
44	0.00049937	0.0045123	109521
45	0.000602214	0.0050791	122722
46	0.000724537	0.00569624	136934
47	0.000869206	0.00636363	152106
48	0.00103971	0.00708007	168153
49	0.0012395	0.00784312	184957
50	0.00147256	0.00864901	202361
51	0.00174338	0.00949261	220178
52	0.00205547	0.0103675	238189
53	0.00241372	0.0112662	256152
54	0.00282252	0.0121802	273816
55	0.00328747	0.0131005	290915
56	0.00381335	0.0140178	307206
57	0.0044056	0.0149229	322456
58	0.00506994	0.0158071	336459
59	0.0058105	0.0166625	349066
60	0.00663571	0.0174823	360139
61	0.0075504	0.0182609	369604
62	0.00856043	0.0189941	377421
63	0.00967446	0.019679	383598
64	0.0108937	0.0203139	388181
65	0.0122298	0.0208983	391236
66	0.0136853	0.0214329	392859
67	0.0152663	0.021919	393165
68	0.0169706	0.0223586	392259
69	0.018815	0.0227543	390267
70	0.0207923	0.0231089	387327
71	0.0229115	0.0234254	383565
72	0.0251809	0.0237069	379083
73	0.0276026	0.0239565	373993
74	0.0301763	0.0241773	368395
75	0.0329167	0.024372	362390
76	0.0358133	0.0245434	356037
77	0.0388982	0.024694	349433
78	0.0421545	0.0248261	342623
79	0.045591	0.0249418	335675
80	0.0492111	0.025043	328630
81	0.0530421	0.0251314	321523
82	0.0570717	0.0252086	314406
83	0.0612944	0.0252759	307304
84	0.0657555	0.0253345	300232
85	0.070443	0.0253856	293221
86	0.0753506	0.0254301	286280
87	0.0805211	0.0254688	279421
88	0.0859416	0.0255024	272659
89	0.0916169	0.0255317	266017
90	0.0975518	0.0255571	259480
91	0.103769	0.0255791	253062
92	0.110247	0.0255983	246777
93	0.117029	0.025615	240612
94	0.124112	0.0256294	234576
95	0.131549	0.025642	228670
96	0.139277	0.0256529	222900
97	0.147298	0.0256623	217264
98	0.155747	0.0256705	211752
99	0.164509	0.0256777	206375
100	0.17364	0.0256838	201122
101	0.183181	0.0256892	195997
102	0.19313	0.0256938	190997
103	0.203405	0.0256979	186118
104	0.214134	0.0257014	181362
105	0.225331	0.0257044	176722
106	0.236907	0.025707	172194
107	0.248999	0.0257093	167781
108	0.261622	0.0257113	163483
109	0.274646	0.025713	159286
110	0.288239	0.0257145	155201
111	0.302353	0.0257158	151220
112	0.316936	0.0257169	147336
113	0.33211	0.0257179	143554
114	0.347847	0.0257187	139864
115	0.364149	0.0257195	136273
116	0.381062	0.0257201	132773
117	0.398585	0.0257206	129360
118	0.416827	0.0257211	126037
119	0.435729	0.0257215	122799
