# Supplementary material for: Quantifying the Potential for Future Gene Therapy to Lower Lifetime Risk of Polygenic Late-Onset Diseases
Source: MDPI journal article supplement (doi:10.3390/ijms20133352), 2019-07-08
Supplement: s2 [file s2 › SuppFiles/Results/LODsCommonLow/T2D/EnvironmentArraySD.csv]

Age	Env	EnvSD	Incidence	CasesExpected
0	0	0	-0.000109115	0
1	0	0	-0.000107483	0
2	0	0	-0.0001056	0
3	0	0	-0.000103429	0
4	0	0	-0.000100926	0
5	0	0	-9.8041e-05	0
6	0	0	-9.47143e-05	0
7	0	0	-9.08791e-05	0
8	0	0	-8.64578e-05	0
9	0	0	-8.13612e-05	0
10	0	0	-7.54864e-05	0
11	0	0	-6.8715e-05	0
12	0	0	-6.09108e-05	0
13	0	0	-5.1917e-05	0
14	0	0	-4.15534e-05	0
15	0	0	-2.96126e-05	0
16	0	0	-1.58566e-05	0
17	0	0	-1.15904e-08	0
18	4.4212e-07	1.18e-09	1.82363e-05	455
19	1.03957e-06	1.972e-09	3.92472e-05	981
20	1.79943e-06	2.151e-09	6.34339e-05	1585
21	2.7491e-06	3.217e-09	9.12689e-05	2281
22	3.92352e-06	3.788e-09	0.000123293	3081
23	5.37602e-06	4.13e-09	0.000160123	4001
24	7.15287e-06	4.116e-09	0.000202463	5059
25	9.33594e-06	6.38e-09	0.000251115	6273
26	1.19898e-05	8.125e-09	0.00030699	7667
27	1.52416e-05	1.173e-08	0.00037112	9266
28	1.92137e-05	1.229e-08	0.000444672	11098
29	2.40576e-05	1.132e-08	0.000528963	13196
30	2.99524e-05	1.522e-08	0.00062547	15596
31	3.71353e-05	1.418e-08	0.000735847	18336
32	4.58747e-05	1.921e-08	0.000861931	21463
33	5.65152e-05	2.391e-08	0.00100576	25022
34	6.95003e-05	2.62e-08	0.00116956	29069
35	8.52437e-05	2.692e-08	0.00135579	33658
36	0.000104427	3.727e-08	0.00156706	38850
37	0.000127633	1.451e-08	0.00180619	44708
38	0.00015585	3.562e-08	0.00207613	51297
39	0.000189986	5.512e-08	0.00237996	58682
40	0.000231251	4.724e-08	0.00272078	66926
41	0.000281135	3.608e-08	0.00310166	76088
42	0.000341124	5.072e-08	0.00352551	86217
43	0.000413151	7.807e-08	0.00399498	97354
44	0.00049937	1.083e-07	0.0045123	109521
45	0.000602214	6.751e-08	0.0050791	122722
46	0.000724537	6.316e-08	0.00569624	136934
47	0.000869206	1.378e-07	0.00636363	152106
48	0.00103971	1.232e-07	0.00708007	168153
49	0.0012395	5.786e-08	0.00784312	184957
50	0.00147256	2.115e-07	0.00864901	202361
51	0.00174338	2.153e-07	0.00949261	220178
52	0.00205547	2.028e-07	0.0103675	238189
53	0.00241372	2.325e-07	0.0112662	256152
54	0.00282252	4.418e-07	0.0121802	273816
55	0.00328747	5.348e-07	0.0131005	290915
56	0.00381335	5.145e-07	0.0140178	307206
57	0.0044056	6.48e-07	0.0149229	322456
58	0.00506994	4.739e-07	0.0158071	336459
59	0.0058105	6.105e-07	0.0166625	349066
60	0.00663571	5.466e-07	0.0174823	360139
61	0.0075504	6.742e-07	0.0182609	369604
62	0.00856043	5.485e-07	0.0189941	377421
63	0.00967446	7.646e-07	0.019679	383598
64	0.0108937	1e-06	0.0203139	388181
65	0.0122298	1.269e-06	0.0208983	391236
66	0.0136853	1.377e-06	0.0214329	392859
67	0.0152663	1.521e-06	0.021919	393165
68	0.0169706	1.835e-06	0.0223586	392259
69	0.018815	1.704e-06	0.0227543	390267
70	0.0207923	1.984e-06	0.0231089	387327
71	0.0229115	1.929e-06	0.0234254	383565
72	0.0251809	2.018e-06	0.0237069	379083
73	0.0276026	1.917e-06	0.0239565	373993
74	0.0301763	2.276e-06	0.0241773	368395
75	0.0329167	2.917e-06	0.024372	362390
76	0.0358133	3.508e-06	0.0245434	356037
77	0.0388982	4.201e-06	0.024694	349433
78	0.0421545	3.745e-06	0.0248261	342623
79	0.045591	2.272e-06	0.0249418	335675
80	0.0492111	4.53e-06	0.025043	328630
81	0.0530421	5.577e-06	0.0251314	321523
82	0.0570717	3.986e-06	0.0252086	314406
83	0.0612944	7.318e-06	0.0252759	307304
84	0.0657555	6.526e-06	0.0253345	300232
85	0.070443	5.081e-06	0.0253856	293221
86	0.0753506	7.329e-06	0.0254301	286280
87	0.0805211	6.313e-06	0.0254688	279421
88	0.0859416	1.034e-05	0.0255024	272659
89	0.0916169	9.93e-06	0.0255317	266017
90	0.0975518	9.626e-06	0.0255571	259480
91	0.103769	9.439e-06	0.0255791	253062
92	0.110247	1.725e-05	0.0255983	246777
93	0.117029	1.851e-05	0.025615	240612
94	0.124112	1.675e-05	0.0256294	234576
95	0.131549	7.337e-06	0.025642	228670
96	0.139277	1.152e-05	0.0256529	222900
97	0.147298	1.539e-05	0.0256623	217264
98	0.155747	1.909e-05	0.0256705	211752
99	0.164509	2.302e-05	0.0256777	206375
100	0.17364	2.69e-05	0.0256838	201122
101	0.183181	2.797e-05	0.0256892	195997
102	0.19313	2.326e-05	0.0256938	190997
103	0.203405	1.399e-05	0.0256979	186118
104	0.214134	2.587e-05	0.0257014	181362
105	0.225331	3.298e-05	0.0257044	176722
106	0.236907	4.84e-05	0.025707	172194
107	0.248999	5.25e-05	0.0257093	167781
108	0.261622	4.056e-05	0.0257113	163483
109	0.274646	3.819e-05	0.025713	159286
110	0.288239	5.345e-05	0.0257145	155201
111	0.302353	6.426e-05	0.0257158	151220
112	0.316936	5.563e-05	0.0257169	147336
113	0.33211	5.694e-05	0.0257179	143554
114	0.347847	5.053e-05	0.0257187	139864
115	0.364149	8.085e-05	0.0257195	136273
116	0.381062	2.903e-05	0.0257201	132773
117	0.398585	6.889e-05	0.0257206	129360
118	0.416827	6.868e-05	0.0257211	126037
119	0.435729	5.498e-05	0.0257215	122799
