# Supplementary material for: Quantifying the Potential for Future Gene Therapy to Lower Lifetime Risk of Polygenic Late-Onset Diseases
Source: MDPI journal article supplement (doi:10.3390/ijms20133352), 2019-07-08
Supplement: s2 [file s2 › SuppFiles/Results/LODsCommonLow/T2D/LifetimeRiskPostAnalysis.csv]

age	A..1..	A..2..	A..3..	A..4..	A..5..	A..6..	A..7..	A..8..	A..9..	A..10..	A..11..	A..12..	A..13..	A..14..	A..15..	A..16..	A..17..	A..18..	A..19..	A..20..
1	0.0000000e+00	0.0000000e+00	0.0000000e+00	0.0000000e+00	0.0000000e+00	0.0000000e+00	0.0000000e+00	0.0000000e+00	0.0000000e+00	0.0000000e+00	0.0000000e+00	0.0000000e+00	0.0000000e+00	0.0000000e+00	0.0000000e+00	0.0000000e+00	0.0000000e+00	0.0000000e+00	0.0000000e+00	0.0000000e+00
2	0.0000000e+00	0.0000000e+00	0.0000000e+00	0.0000000e+00	0.0000000e+00	0.0000000e+00	0.0000000e+00	0.0000000e+00	0.0000000e+00	0.0000000e+00	0.0000000e+00	0.0000000e+00	0.0000000e+00	0.0000000e+00	0.0000000e+00	0.0000000e+00	0.0000000e+00	0.0000000e+00	0.0000000e+00	0.0000000e+00
3	0.0000000e+00	0.0000000e+00	0.0000000e+00	0.0000000e+00	0.0000000e+00	0.0000000e+00	0.0000000e+00	0.0000000e+00	0.0000000e+00	0.0000000e+00	0.0000000e+00	0.0000000e+00	0.0000000e+00	0.0000000e+00	0.0000000e+00	0.0000000e+00	0.0000000e+00	0.0000000e+00	0.0000000e+00	0.0000000e+00
4	0.0000000e+00	0.0000000e+00	0.0000000e+00	0.0000000e+00	0.0000000e+00	0.0000000e+00	0.0000000e+00	0.0000000e+00	0.0000000e+00	0.0000000e+00	0.0000000e+00	0.0000000e+00	0.0000000e+00	0.0000000e+00	0.0000000e+00	0.0000000e+00	0.0000000e+00	0.0000000e+00	0.0000000e+00	0.0000000e+00
5	0.0000000e+00	0.0000000e+00	0.0000000e+00	0.0000000e+00	0.0000000e+00	0.0000000e+00	0.0000000e+00	0.0000000e+00	0.0000000e+00	0.0000000e+00	0.0000000e+00	0.0000000e+00	0.0000000e+00	0.0000000e+00	0.0000000e+00	0.0000000e+00	0.0000000e+00	0.0000000e+00	0.0000000e+00	0.0000000e+00
6	0.0000000e+00	0.0000000e+00	0.0000000e+00	0.0000000e+00	0.0000000e+00	0.0000000e+00	0.0000000e+00	0.0000000e+00	0.0000000e+00	0.0000000e+00	0.0000000e+00	0.0000000e+00	0.0000000e+00	0.0000000e+00	0.0000000e+00	0.0000000e+00	0.0000000e+00	0.0000000e+00	0.0000000e+00	0.0000000e+00
7	0.0000000e+00	0.0000000e+00	0.0000000e+00	0.0000000e+00	0.0000000e+00	0.0000000e+00	0.0000000e+00	0.0000000e+00	0.0000000e+00	0.0000000e+00	0.0000000e+00	0.0000000e+00	0.0000000e+00	0.0000000e+00	0.0000000e+00	0.0000000e+00	0.0000000e+00	0.0000000e+00	0.0000000e+00	0.0000000e+00
8	0.0000000e+00	0.0000000e+00	0.0000000e+00	0.0000000e+00	0.0000000e+00	0.0000000e+00	0.0000000e+00	0.0000000e+00	0.0000000e+00	0.0000000e+00	0.0000000e+00	0.0000000e+00	0.0000000e+00	0.0000000e+00	0.0000000e+00	0.0000000e+00	0.0000000e+00	0.0000000e+00	0.0000000e+00	0.0000000e+00
9	0.0000000e+00	0.0000000e+00	0.0000000e+00	0.0000000e+00	0.0000000e+00	0.0000000e+00	0.0000000e+00	0.0000000e+00	0.0000000e+00	0.0000000e+00	0.0000000e+00	0.0000000e+00	0.0000000e+00	0.0000000e+00	0.0000000e+00	0.0000000e+00	0.0000000e+00	0.0000000e+00	0.0000000e+00	0.0000000e+00
10	0.0000000e+00	0.0000000e+00	0.0000000e+00	0.0000000e+00	0.0000000e+00	0.0000000e+00	0.0000000e+00	0.0000000e+00	0.0000000e+00	0.0000000e+00	0.0000000e+00	0.0000000e+00	0.0000000e+00	0.0000000e+00	0.0000000e+00	0.0000000e+00	0.0000000e+00	0.0000000e+00	0.0000000e+00	0.0000000e+00
11	0.0000000e+00	0.0000000e+00	0.0000000e+00	0.0000000e+00	0.0000000e+00	0.0000000e+00	0.0000000e+00	0.0000000e+00	0.0000000e+00	0.0000000e+00	0.0000000e+00	0.0000000e+00	0.0000000e+00	0.0000000e+00	0.0000000e+00	0.0000000e+00	0.0000000e+00	0.0000000e+00	0.0000000e+00	0.0000000e+00
12	0.0000000e+00	0.0000000e+00	0.0000000e+00	0.0000000e+00	0.0000000e+00	0.0000000e+00	0.0000000e+00	0.0000000e+00	0.0000000e+00	0.0000000e+00	0.0000000e+00	0.0000000e+00	0.0000000e+00	0.0000000e+00	0.0000000e+00	0.0000000e+00	0.0000000e+00	0.0000000e+00	0.0000000e+00	0.0000000e+00
13	0.0000000e+00	0.0000000e+00	0.0000000e+00	0.0000000e+00	0.0000000e+00	0.0000000e+00	0.0000000e+00	0.0000000e+00	0.0000000e+00	0.0000000e+00	0.0000000e+00	0.0000000e+00	0.0000000e+00	0.0000000e+00	0.0000000e+00	0.0000000e+00	0.0000000e+00	0.0000000e+00	0.0000000e+00	0.0000000e+00
14	0.0000000e+00	0.0000000e+00	0.0000000e+00	0.0000000e+00	0.0000000e+00	0.0000000e+00	0.0000000e+00	0.0000000e+00	0.0000000e+00	0.0000000e+00	0.0000000e+00	0.0000000e+00	0.0000000e+00	0.0000000e+00	0.0000000e+00	0.0000000e+00	0.0000000e+00	0.0000000e+00	0.0000000e+00	0.0000000e+00
15	0.0000000e+00	0.0000000e+00	0.0000000e+00	0.0000000e+00	0.0000000e+00	0.0000000e+00	0.0000000e+00	0.0000000e+00	0.0000000e+00	0.0000000e+00	0.0000000e+00	0.0000000e+00	0.0000000e+00	0.0000000e+00	0.0000000e+00	0.0000000e+00	0.0000000e+00	0.0000000e+00	0.0000000e+00	0.0000000e+00
16	0.0000000e+00	0.0000000e+00	0.0000000e+00	0.0000000e+00	0.0000000e+00	0.0000000e+00	0.0000000e+00	0.0000000e+00	0.0000000e+00	0.0000000e+00	0.0000000e+00	0.0000000e+00	0.0000000e+00	0.0000000e+00	0.0000000e+00	0.0000000e+00	0.0000000e+00	0.0000000e+00	0.0000000e+00	0.0000000e+00
17	0.0000000e+00	0.0000000e+00	0.0000000e+00	0.0000000e+00	0.0000000e+00	0.0000000e+00	0.0000000e+00	0.0000000e+00	0.0000000e+00	0.0000000e+00	0.0000000e+00	0.0000000e+00	0.0000000e+00	0.0000000e+00	0.0000000e+00	0.0000000e+00	0.0000000e+00	0.0000000e+00	0.0000000e+00	0.0000000e+00
18	0.0000000e+00	0.0000000e+00	0.0000000e+00	0.0000000e+00	0.0000000e+00	0.0000000e+00	0.0000000e+00	0.0000000e+00	0.0000000e+00	0.0000000e+00	0.0000000e+00	0.0000000e+00	0.0000000e+00	0.0000000e+00	0.0000000e+00	0.0000000e+00	0.0000000e+00	0.0000000e+00	0.0000000e+00	0.0000000e+00
19	7.0085561e-06	7.0190951e-06	7.0225609e-06	7.0276183e-06	1.7523156e-06	1.7549507e-06	1.7558172e-06	1.7570817e-06	4.3808123e-07	4.3873999e-07	4.3895663e-07	4.3927275e-07	1.0952032e-07	1.0968501e-07	1.0973917e-07	1.0981820e-07	2.7380078e-08	2.7421250e-08	2.7434790e-08	2.7454547e-08
20	2.3476974e-05	2.3518194e-05	2.3530806e-05	2.3546422e-05	5.8703961e-06	5.8807030e-06	5.8838566e-06	5.8877615e-06	1.4676142e-06	1.4701910e-06	1.4709794e-06	1.4719556e-06	3.6690361e-07	3.6754780e-07	3.6774490e-07	3.6798896e-07	9.1725891e-08	9.1886939e-08	9.1936214e-08	9.1997229e-08
21	5.1960159e-05	5.2065411e-05	5.2097880e-05	5.2129756e-05	1.2994114e-05	1.3020435e-05	1.3028555e-05	1.3036527e-05	3.2485820e-06	3.2551625e-06	3.2571925e-06	3.2591855e-06	8.1214572e-07	8.1379084e-07	8.1429835e-07	8.1479658e-07	2.0303639e-07	2.0344767e-07	2.0357455e-07	2.0369911e-07
22	9.5435433e-05	9.5655850e-05	9.5727441e-05	9.5782394e-05	2.3869744e-05	2.3924875e-05	2.3942782e-05	2.3956526e-05	5.9675794e-06	5.9813625e-06	5.9858392e-06	5.9892754e-06	1.4918954e-06	1.4953412e-06	1.4964604e-06	1.4973194e-06	3.7297376e-07	3.7383520e-07	3.7411500e-07	3.7432976e-07
23	1.5741796e-04	1.5782779e-04	1.5797244e-04	1.5805813e-04	3.9379238e-05	3.9481763e-05	3.9517952e-05	3.9539386e-05	9.8451354e-06	9.8707675e-06	9.8798151e-06	9.8851739e-06	2.4612851e-06	2.4676932e-06	2.4699551e-06	2.4712947e-06	6.1532106e-07	6.1692307e-07	6.1748855e-07	6.1782347e-07
24	2.4224490e-04	2.4294852e-04	2.4322118e-04	2.4334895e-04	6.0611964e-05	6.0788029e-05	6.0856257e-05	6.0888227e-05	1.5153659e-05	1.5197678e-05	1.5214735e-05	1.5222728e-05	3.7884175e-06	3.7994220e-06	3.8036865e-06	3.8056847e-06	9.4710392e-07	9.4985505e-07	9.5092117e-07	9.5142073e-07
25	3.5495974e-04	3.5609523e-04	3.5657867e-04	3.5676929e-04	8.8836627e-05	8.9120833e-05	8.9241845e-05	8.9289550e-05	2.2210431e-05	2.2281487e-05	2.2311742e-05	2.2323669e-05	5.5526126e-06	5.5703766e-06	5.5779404e-06	5.5809222e-06	1.3881523e-06	1.3925933e-06	1.3944842e-06	1.3952297e-06
26	5.0186433e-04	5.0360716e-04	5.0442222e-04	5.0471568e-04	1.2564094e-04	1.2607731e-04	1.2628140e-04	1.2635487e-04	3.1412540e-05	3.1521640e-05	3.1572667e-05	3.1591036e-05	7.8531440e-06	7.8804190e-06	7.8931759e-06	7.8977681e-06	1.9632844e-06	1.9701032e-06	1.9732924e-06	1.9744405e-06
27	6.9023262e-04	6.9279894e-04	6.9411517e-04	6.9457887e-04	1.7286173e-04	1.7350453e-04	1.7383426e-04	1.7395040e-04	4.3219436e-05	4.3380152e-05	4.3462592e-05	4.3491632e-05	1.0804875e-05	1.0845054e-05	1.0865664e-05	1.0872924e-05	2.7012159e-06	2.7112607e-06	2.7164132e-06	2.7182282e-06
28	9.2927198e-04	9.3292926e-04	9.3497928e-04	9.3572605e-04	2.3282920e-04	2.3374569e-04	2.3425950e-04	2.3444666e-04	5.8214045e-05	5.8443196e-05	5.8571667e-05	5.8618463e-05	1.4553538e-05	1.4610826e-05	1.4642943e-05	1.4654642e-05	3.6383799e-06	3.6527018e-06	3.6607312e-06	3.6636560e-06
29	1.2300259e-03	1.2350954e-03	1.2381920e-03	1.2393947e-03	3.0834699e-04	3.0961808e-04	3.1039468e-04	3.1069633e-04	7.7097846e-05	7.7415668e-05	7.7609849e-05	7.7685274e-05	1.9274505e-05	1.9353961e-05	1.9402506e-05	1.9421362e-05	4.8186188e-06	4.8384827e-06	4.8506190e-06	4.8553330e-06
30	1.6057859e-03	1.6126656e-03	1.6172088e-03	1.6191176e-03	4.0280210e-04	4.0452823e-04	4.0566847e-04	4.0614761e-04	1.0071844e-04	1.0115005e-04	1.0143517e-04	1.0155498e-04	2.5179680e-05	2.5287584e-05	2.5358864e-05	2.5388817e-05	6.2949080e-06	6.3218839e-06	6.3397038e-06	6.3471920e-06
31	2.0724705e-03	2.0816627e-03	2.0881449e-03	2.0911124e-03	5.2026973e-04	5.2257793e-04	5.2420622e-04	5.2495184e-04	1.3009590e-04	1.3067309e-04	1.3108026e-04	1.3126672e-04	3.2524087e-05	3.2668383e-05	3.2770178e-05	3.2816792e-05	8.1310027e-06	8.1670767e-06	8.1925251e-06	8.2041786e-06
32	2.6494551e-03	2.6615949e-03	2.6706123e-03	2.6751228e-03	6.6573666e-04	6.6878798e-04	6.7105545e-04	6.7219008e-04	1.6647884e-04	1.6724189e-04	1.6780893e-04	1.6809268e-04	4.1619885e-05	4.1810647e-05	4.1952409e-05	4.2023346e-05	1.0404941e-05	1.0452632e-05	1.0488072e-05	1.0505806e-05
33	3.3599533e-03	3.3758320e-03	3.3881092e-03	3.3948122e-03	8.4521804e-04	8.4921386e-04	8.5230479e-04	8.5399327e-04	2.1137389e-04	2.1237319e-04	2.1314621e-04	2.1356850e-04	5.2843743e-05	5.3093570e-05	5.3286826e-05	5.3392399e-05	1.3210889e-05	1.3273346e-05	1.3321659e-05	1.3348053e-05
34	4.2320315e-03	4.2526564e-03	4.2690508e-03	4.2788050e-03	1.0660450e-03	1.0712426e-03	1.0753761e-03	1.0778372e-03	2.6661806e-04	2.6791802e-04	2.6895186e-04	2.6956743e-04	6.6654933e-05	6.6979925e-05	6.7238386e-05	6.7392281e-05	1.6663661e-05	1.6744909e-05	1.6809524e-05	1.6847998e-05
35	5.2998976e-03	5.3265490e-03	5.3481170e-03	5.3620055e-03	1.3372383e-03	1.3439665e-03	1.3494138e-03	1.3529249e-03	3.3447294e-04	3.3615585e-04	3.3751842e-04	3.3839671e-04	8.3618874e-05	8.4039604e-05	8.4380251e-05	8.4599824e-05	2.0904609e-05	2.1009791e-05	2.1094952e-05	2.1149845e-05
36	6.6031659e-03	6.6374491e-03	6.6655127e-03	6.6848477e-03	1.6693814e-03	1.6780545e-03	1.6851573e-03	1.6900564e-03	4.1759365e-04	4.1976330e-04	4.2154015e-04	4.2276581e-04	1.0439938e-04	1.0494180e-04	1.0538602e-04	1.0569244e-04	2.6099679e-05	2.6235282e-05	2.6346336e-05	2.6422940e-05
37	8.1904574e-03	8.2344064e-03	8.2706280e-03	8.2969801e-03	2.0756405e-03	2.0867876e-03	2.0959784e-03	2.1026735e-03	5.1928570e-04	5.2207461e-04	5.2437412e-04	5.2604933e-04	1.2982289e-04	1.3052013e-04	1.3109501e-04	1.3151382e-04	3.2455471e-05	3.2629778e-05	3.2773498e-05	3.2878200e-05
38	1.0117312e-02	1.0173526e-02	1.0219952e-02	1.0255201e-02	2.5713507e-03	2.5856531e-03	2.5974691e-03	2.6064530e-03	6.4340305e-04	6.4698200e-04	6.4993883e-04	6.5218711e-04	1.6085297e-04	1.6174772e-04	1.6248694e-04	1.6304902e-04	4.0212864e-05	4.0436549e-05	4.0621351e-05	4.0761870e-05
39	1.2451369e-02	1.2523159e-02	1.2582373e-02	1.2628714e-02	3.1755608e-03	3.1938953e-03	3.2090216e-03	3.2208771e-03	7.9473808e-04	7.9932694e-04	8.0311288e-04	8.0608041e-04	1.9868784e-04	1.9983507e-04	2.0078158e-04	2.0152347e-04	4.9671389e-05	4.9958194e-05	5.0194817e-05	5.0380289e-05
40	1.5270003e-02	1.5361547e-02	1.5436780e-02	1.5496873e-02	3.9106734e-03	3.9341599e-03	3.9534640e-03	3.9689059e-03	9.7893521e-04	9.8481502e-04	9.8964779e-04	9.9351395e-04	2.4473876e-04	2.4620874e-04	2.4741696e-04	2.4838353e-04	6.1183838e-05	6.1551328e-05	6.1853379e-05	6.2095016e-05
41	1.8663132e-02	1.8779706e-02	1.8874954e-02	1.8952084e-02	4.8035579e-03	4.8336307e-03	4.8582019e-03	4.8781268e-03	1.2027758e-03	1.2103067e-03	1.2164599e-03	1.2214500e-03	3.0070133e-04	3.0258411e-04	3.0412246e-04	3.0537000e-04	7.5174062e-05	7.5644750e-05	7.6029329e-05	7.6341210e-05
42	2.2734905e-02	2.2883187e-02	2.3003424e-02	2.3101644e-02	5.8865304e-03	5.9250370e-03	5.9562543e-03	5.9817886e-03	1.4744323e-03	1.4840788e-03	1.4918991e-03	1.4982963e-03	3.6861904e-04	3.7103074e-04	3.7298589e-04	3.7458522e-04	9.2152875e-05	9.2755787e-05	9.3244563e-05	9.3644388e-05
43	2.7600763e-02	2.7789179e-02	2.7940644e-02	2.8064845e-02	7.1972215e-03	7.2465384e-03	7.2861675e-03	7.3187004e-03	1.8034464e-03	1.8158065e-03	1.8257384e-03	1.8338923e-03	4.5087782e-04	4.5396798e-04	4.5645105e-04	4.5848961e-04	1.1271667e-04	1.1348918e-04	1.1410994e-04	1.1461956e-04
44	3.3389859e-02	3.3629033e-02	3.3819469e-02	3.3975665e-02	8.7801537e-03	8.8433497e-03	8.8936349e-03	8.9349163e-03	2.2011414e-03	2.2169885e-03	2.2295977e-03	2.2399495e-03	5.5030928e-04	5.5427125e-04	5.5742368e-04	5.6001177e-04	1.3757321e-04	1.3856367e-04	1.3935175e-04	1.3999875e-04
45	4.0242997e-02	4.0546455e-02	4.0785373e-02	4.0980882e-02	1.0687345e-02	1.0768431e-02	1.0832208e-02	1.0884430e-02	2.6807963e-03	2.7011427e-03	2.7171451e-03	2.7302485e-03	6.7023423e-04	6.7532113e-04	6.7932195e-04	6.8259799e-04	1.6755251e-04	1.6882419e-04	1.6982435e-04	1.7064333e-04
46	4.8310349e-02	4.8695343e-02	4.8994369e-02	4.9237949e-02	1.2979117e-02	1.3083366e-02	1.3164219e-02	1.3230097e-02	3.2578799e-03	3.2840588e-03	3.3043609e-03	3.3209030e-03	8.1452142e-04	8.2106660e-04	8.2614249e-04	8.3027829e-04	2.0362151e-04	2.0525773e-04	2.0652664e-04	2.0756054e-04
47	5.7749478e-02	5.8237769e-02	5.8611107e-02	5.8913248e-02	1.5725363e-02	1.5859664e-02	1.5962138e-02	1.6045054e-02	3.9504105e-03	3.9841680e-03	4.0099223e-03	4.0307609e-03	9.8767759e-04	9.9611769e-04	1.0025568e-03	1.0077669e-03	2.4690651e-04	2.4901641e-04	2.5062610e-04	2.5192854e-04
48	6.8717354e-02	6.9336132e-02	6.9801008e-02	7.0174376e-02	1.9005123e-02	1.9178445e-02	1.9308291e-02	1.9412506e-02	4.7789029e-03	4.8225172e-03	4.8551860e-03	4.8814050e-03	1.1948345e-03	1.2057392e-03	1.2139072e-03	1.2204626e-03	2.9868992e-04	3.0141591e-04	3.0345777e-04	3.0509651e-04
49	8.1368175e-02	8.2151371e-02	8.2728611e-02	8.3188250e-02	2.2908320e-02	2.3132371e-02	2.3296886e-02	2.3427718e-02	5.7668769e-03	5.8233317e-03	5.8647756e-03	5.8977319e-03	1.4418761e-03	1.4559916e-03	1.4663538e-03	1.4745938e-03	3.6044206e-04	3.6397062e-04	3.6656097e-04	3.6862081e-04
50	9.5843694e-02	9.6832933e-02	9.7547891e-02	9.8111391e-02	2.7534929e-02	2.7824834e-02	2.8033365e-02	2.8197393e-02	6.9407330e-03	7.0138962e-03	7.0665081e-03	7.1078867e-03	1.7354084e-03	1.7537019e-03	1.7668567e-03	1.7772029e-03	4.3381340e-04	4.3838631e-04	4.4167470e-04	4.4426098e-04
51	1.1226925e-01	1.1351501e-01	1.1439857e-01	1.1508636e-01	3.2996074e-02	3.3371265e-02	3.3635852e-02	3.3841206e-02	8.3301449e-03	8.4250063e-03	8.4918799e-03	8.5437726e-03	2.0828573e-03	2.1065768e-03	2.1232981e-03	2.1362735e-03	5.2065913e-04	5.2658830e-04	5.3076812e-04	5.3401159e-04
52	1.3074884e-01	1.3231200e-01	1.3340126e-01	1.3423704e-01	3.9414705e-02	3.9900142e-02	4.0236177e-02	4.0492932e-02	9.9683729e-03	1.0091372e-02	1.0176482e-02	1.0241494e-02	2.4925482e-03	2.5233046e-03	2.5445863e-03	2.5608425e-03	6.2305885e-04	6.3074683e-04	6.3606650e-04	6.4012999e-04
53	1.5135132e-01	1.5330363e-01	1.5464263e-01	1.5565361e-01	4.6921043e-02	4.7548263e-02	4.7975290e-02	4.8295876e-02	1.1891245e-02	1.2050564e-02	1.2158983e-02	1.2240346e-02	2.9734514e-03	3.0132914e-03	3.0404026e-03	3.0607482e-03	7.4325280e-04	7.5321106e-04	7.5998773e-04	7.6507329e-04
54	1.7411598e-01	1.7654049e-01	1.7818150e-01	1.7939886e-01	5.5656053e-02	5.6464462e-02	5.7007370e-02	5.7407149e-02	1.4138249e-02	1.4344178e-02	1.4482405e-02	1.4584140e-02	3.5354569e-03	3.5869543e-03	3.6215213e-03	3.6469621e-03	8.8371044e-04	8.9658217e-04	9.0522219e-04	9.1158117e-04
55	1.9904603e-01	2.0203739e-01	2.0404132e-01	2.0550126e-01	6.5768004e-02	6.6806337e-02	6.7496450e-02	6.7994620e-02	1.6751860e-02	1.7017217e-02	1.7193492e-02	1.7320658e-02	4.1892057e-03	4.2555680e-03	4.2996519e-03	4.3314538e-03	1.0470882e-03	1.0636748e-03	1.0746931e-03	1.0826418e-03
56	2.2611460e-01	2.2977898e-01	2.3221614e-01	2.3396083e-01	7.7414909e-02	7.8742819e-02	7.9619342e-02	8.0240035e-02	1.9778453e-02	2.0119060e-02	2.0343776e-02	2.0502781e-02	4.9463205e-03	5.0315071e-03	5.0877086e-03	5.1274752e-03	1.2362866e-03	1.2575773e-03	1.2716238e-03	1.2815628e-03
57	2.5526071e-01	2.5971498e-01	2.6266633e-01	2.6474425e-01	9.0759444e-02	9.2449012e-02	9.3560952e-02	9.4334214e-02	2.3267249e-02	2.3702408e-02	2.3988671e-02	2.4187564e-02	5.8191436e-03	5.9279850e-03	5.9995844e-03	6.0493301e-03	1.4543851e-03	1.4815866e-03	1.4994807e-03	1.5119132e-03
58	2.8639463e-01	2.9176714e-01	2.9532390e-01	2.9779036e-01	1.0596867e-01	1.0810681e-01	1.0951450e-01	1.1047757e-01	2.7270573e-02	2.7823802e-02	2.8187913e-02	2.8436765e-02	6.8208021e-03	6.9591855e-03	7.0502628e-03	7.1125086e-03	1.7046575e-03	1.7392403e-03	1.7620011e-03	1.7775569e-03
59	3.1940325e-01	3.2583275e-01	3.3009612e-01	3.3301451e-01	1.2321281e-01	1.2590313e-01	1.2767997e-01	1.2887912e-01	3.1843887e-02	3.2543562e-02	3.3005573e-02	3.3317039e-02	7.9652186e-03	8.1402480e-03	8.2558237e-03	8.3337379e-03	1.9905746e-03	2.0343129e-03	2.0631943e-03	2.0826646e-03
60	3.5415152e-01	3.6178441e-01	3.6686525e-01	3.7030700e-01	1.4265831e-01	1.4602206e-01	1.4825636e-01	1.4974840e-01	3.7044227e-02	3.7923998e-02	3.8508349e-02	3.8898140e-02	9.2667213e-03	9.4868241e-03	9.6330181e-03	9.7305351e-03	2.3157065e-03	2.3707046e-03	2.4072349e-03	2.4316023e-03
61	3.9049677e-01	3.9948681e-01	4.0550505e-01	4.0955023e-01	1.6447776e-01	1.6865626e-01	1.7145332e-01	1.7330762e-01	4.2933453e-02	4.4033131e-02	4.4769373e-02	4.5256942e-02	1.0740862e-02	1.1016010e-02	1.1200224e-02	1.1322216e-02	2.6839263e-03	2.7526740e-03	2.7987011e-03	2.8291819e-03
62	4.2828249e-01	4.3879008e-01	4.4587350e-01	4.5061205e-01	1.8883514e-01	1.9399188e-01	1.9747557e-01	1.9977683e-01	4.9574520e-02	5.0940916e-02	5.1864371e-02	5.2473803e-02	1.2403483e-02	1.2745405e-02	1.2976488e-02	1.3128989e-02	3.0991767e-03	3.1846017e-03	3.2423348e-03	3.2804354e-03
63	4.6734390e-01	4.7953662e-01	4.8782178e-01	4.9335266e-01	2.1588476e-01	2.2220844e-01	2.2652432e-01	2.2937426e-01	5.7031596e-02	5.8719693e-02	5.9872568e-02	6.0633262e-02	1.4270749e-02	1.4693225e-02	1.4981756e-02	1.5172133e-02	3.5654778e-03	3.6710192e-03	3.7430982e-03	3.7906575e-03
64	5.0751760e-01	5.2156980e-01	5.3120093e-01	5.3763162e-01	2.4577738e-01	2.5348466e-01	2.5880206e-01	2.6232153e-01	6.5372335e-02	6.7446492e-02	6.8878813e-02	6.9826321e-02	1.6359723e-02	1.6878890e-02	1.7237409e-02	1.7474575e-02	4.0870697e-03	4.2167535e-03	4.3063078e-03	4.3655496e-03
65	5.4863369e-01	5.6472835e-01	5.7585413e-01	5.8330014e-01	2.7863543e-01	2.8797495e-01	2.9448680e-01	2.9881767e-01	7.4660685e-02	7.7196244e-02	7.8966216e-02	8.0143091e-02	1.8686563e-02	1.9321317e-02	1.9764421e-02	2.0059046e-02	4.6679624e-03	4.8265022e-03	4.9371732e-03	5.0107595e-03
66	5.9053078e-01	6.0885984e-01	6.2163352e-01	6.3021774e-01	3.1457838e-01	3.2583477e-01	3.3376033e-01	3.3906766e-01	8.4965148e-02	8.8050253e-02	9.0225520e-02	9.1682335e-02	2.1268599e-02	2.2041055e-02	2.2585717e-02	2.2950487e-02	5.3124531e-03	5.5053642e-03	5.6413843e-03	5.7324795e-03
67	6.3304457e-01	6.5381142e-01	6.6839044e-01	6.7824185e-01	3.5369225e-01	3.6719147e-01	3.7677799e-01	3.8325117e-01	9.6349470e-02	1.0008736e-01	1.0274606e-01	1.0454221e-01	2.4122002e-02	2.5058075e-02	2.5723905e-02	2.6173726e-02	6.0245442e-03	6.2582874e-03	6.4245463e-03	6.5368665e-03
68	6.7601386e-01	6.9943364e-01	7.1598082e-01	7.2723581e-01	3.9603626e-01	4.1214980e-01	4.2367585e-01	4.3153218e-01	1.0887478e-01	1.1338599e-01	1.1661840e-01	1.1882368e-01	2.7262319e-02	2.8392275e-02	2.9201945e-02	2.9754343e-02	6.8080771e-03	7.0901957e-03	7.2923435e-03	7.4302575e-03
69	7.1927602e-01	7.4557973e-01	7.6426282e-01	7.7706389e-01	4.4161991e-01	4.6077213e-01	4.7454871e-01	4.8403408e-01	1.2259144e-01	1.2801702e-01	1.3192664e-01	1.3462212e-01	3.0702429e-02	3.2061710e-02	3.3041222e-02	3.3716561e-02	7.6662215e-03	8.0055455e-03	8.2500611e-03	8.4186429e-03
70	7.6267837e-01	7.9211632e-01	8.1311114e-01	8.2760391e-01	4.9044393e-01	5.1312191e-01	5.2949899e-01	5.4088738e-01	1.3755332e-01	1.4405935e-01	1.4876588e-01	1.5204453e-01	3.4456141e-02	3.6086490e-02	3.7265936e-02	3.8087583e-02	8.6023708e-03	9.0092975e-03	9.3036749e-03	9.5087452e-03
71	8.0606549e-01	8.3891038e-01	8.6240076e-01	8.7873404e-01	5.4244350e-01	5.6920470e-01	5.8857272e-01	6.0216696e-01	1.5379678e-01	1.6157832e-01	1.6721915e-01	1.7118685e-01	3.8532901e-02	4.0483374e-02	4.1897309e-02	4.2891895e-02	9.6188257e-03	1.0105569e-02	1.0458411e-02	1.0706600e-02
72	8.4928412e-01	8.8583447e-01	9.1201553e-01	9.3034142e-01	5.9751823e-01	6.2900141e-01	6.5179824e-01	6.6793174e-01	1.7135100e-01	1.8063759e-01	1.8737130e-01	1.9214836e-01	4.2940389e-02	4.5268750e-02	4.6957083e-02	4.8154879e-02	1.0717439e-02	1.1298375e-02	1.1719614e-02	1.2018455e-02
73	8.9218386e-01	9.3276578e-01	9.6184438e-01	9.8231991e-01	6.5552919e-01	6.9246404e-01	7.1917906e-01	7.3821939e-01	1.9023604e-01	2.0129739e-01	2.0930664e-01	2.1502999e-01	4.7684047e-02	5.0458200e-02	5.2466931e-02	5.3902424e-02	1.1899499e-02	1.2591520e-02	1.3092598e-02	1.3450670e-02
74	9.3461859e-01	9.7958267e-01	1.0000000e+00	1.0000000e+00	7.1629040e-01	7.5949996e-01	7.9068371e-01	8.1303370e-01	2.1045785e-01	2.2360747e-01	2.3310394e-01	2.3992877e-01	5.2765799e-02	5.6064736e-02	5.8447208e-02	6.0159504e-02	1.3165409e-02	1.3988158e-02	1.4582339e-02	1.5009365e-02
75	9.7644732e-01	1.0000000e+00	1.0000000e+00	1.0000000e+00	7.7956796e-01	8.2996827e-01	8.6624079e-01	8.9234411e-01	2.3200569e-01	2.4760396e-01	2.5883331e-01	2.6693626e-01	5.8183412e-02	6.2097997e-02	6.4916152e-02	6.6949796e-02	1.4514534e-02	1.5490596e-02	1.6193273e-02	1.6700323e-02
76	1.0000000e+00	1.0000000e+00	1.0000000e+00	1.0000000e+00	8.4510309e-01	9.0370402e-01	9.4576657e-01	9.7611107e-01	2.5486107e-01	2.7331931e-01	2.8656794e-01	2.9615000e-01	6.3932741e-02	6.8566758e-02	7.1892868e-02	7.4298586e-02	1.5945756e-02	1.7100911e-02	1.7930037e-02	1.8529710e-02
77	1.0000000e+00	1.0000000e+00	1.0000000e+00	1.0000000e+00	9.1256214e-01	9.8047008e-01	1.0000000e+00	1.0000000e+00	2.7897363e-01	3.0075857e-01	3.1635977e-01	3.2765012e-01	7.0001633e-02	7.5472947e-02	7.9391177e-02	8.2226855e-02	1.7455960e-02	1.8819471e-02	1.9795942e-02	2.0502608e-02
78	1.0000000e+00	1.0000000e+00	1.0000000e+00	1.0000000e+00	9.8159500e-01	1.0000000e+00	1.0000000e+00	1.0000000e+00	3.0428760e-01	3.2993124e-01	3.4827399e-01	3.6153473e-01	7.6376623e-02	8.2819699e-02	8.7428351e-02	9.0760245e-02	1.9041698e-02	2.0646928e-02	2.1795137e-02	2.2625234e-02
79	1.0000000e+00	1.0000000e+00	1.0000000e+00	1.0000000e+00	1.0000000e+00	1.0000000e+00	1.0000000e+00	1.0000000e+00	3.3070836e-01	3.6081384e-01	3.8234579e-01	3.9787781e-01	8.3034435e-02	9.0601859e-02	9.6014162e-02	9.9918401e-02	2.0697083e-02	2.2581870e-02	2.3929897e-02	2.4902301e-02
80	1.0000000e+00	1.0000000e+00	1.0000000e+00	1.0000000e+00	1.0000000e+00	1.0000000e+00	1.0000000e+00	1.0000000e+00	3.5811903e-01	3.9336878e-01	4.1860021e-01	4.3675030e-01	8.9946188e-02	9.8810765e-02	1.0515591e-01	1.0972031e-01	2.2414839e-02	2.4622003e-02	2.6201868e-02	2.7338338e-02
81	1.0000000e+00	1.0000000e+00	1.0000000e+00	1.0000000e+00	1.0000000e+00	1.0000000e+00	1.0000000e+00	1.0000000e+00	3.8637482e-01	4.2753801e-01	4.5704515e-01	4.7821409e-01	9.7075920e-02	1.0743263e-01	1.1485666e-01	1.2018280e-01	2.4185933e-02	2.6763756e-02	2.8611625e-02	2.9937320e-02
82	1.0000000e+00	1.0000000e+00	1.0000000e+00	1.0000000e+00	1.0000000e+00	1.0000000e+00	1.0000000e+00	1.0000000e+00	4.1530902e-01	4.6325046e-01	4.9768468e-01	5.2233796e-01	1.0438213e-01	1.1645043e-01	1.2511860e-01	1.3132458e-01	2.5999958e-02	2.9002743e-02	3.1159514e-02	3.2703659e-02
83	1.0000000e+00	1.0000000e+00	1.0000000e+00	1.0000000e+00	1.0000000e+00	1.0000000e+00	1.0000000e+00	1.0000000e+00	4.4471093e-01	5.0039130e-01	5.4048703e-01	5.6916272e-01	1.1181212e-01	1.2583607e-01	1.3593493e-01	1.4315739e-01	2.7843743e-02	3.1331834e-02	3.3843637e-02	3.5640026e-02
84	1.0000000e+00	1.0000000e+00	1.0000000e+00	1.0000000e+00	1.0000000e+00	1.0000000e+00	1.0000000e+00	1.0000000e+00	4.7433880e-01	5.3880818e-01	5.8539161e-01	6.1870453e-01	1.1930520e-01	1.3555195e-01	1.4729160e-01	1.5568684e-01	2.9702160e-02	3.3741543e-02	3.6660289e-02	3.8747550e-02
85	1.0000000e+00	1.0000000e+00	1.0000000e+00	1.0000000e+00	1.0000000e+00	1.0000000e+00	1.0000000e+00	1.0000000e+00	5.0394883e-01	5.7834236e-01	6.3234531e-01	6.7099396e-01	1.2680012e-01	1.4555887e-01	1.5917655e-01	1.6892238e-01	3.1559945e-02	3.6221986e-02	3.9606246e-02	4.2028279e-02
86	1.0000000e+00	1.0000000e+00	1.0000000e+00	1.0000000e+00	1.0000000e+00	1.0000000e+00	1.0000000e+00	1.0000000e+00	5.3326651e-01	6.1878897e-01	6.8125670e-01	7.2602580e-01	1.3422764e-01	1.5580587e-01	1.7156807e-01	1.8286449e-01	3.3399894e-02	3.8760377e-02	4.2675878e-02	4.5482024e-02
87	1.0000000e+00	1.0000000e+00	1.0000000e+00	1.0000000e+00	1.0000000e+00	1.0000000e+00	1.0000000e+00	1.0000000e+00	5.6199279e-01	6.5989234e-01	7.3198913e-01	7.8375754e-01	1.4151213e-01	1.6622897e-01	1.8443293e-01	1.9750426e-01	3.5203249e-02	4.1340730e-02	4.5860716e-02	4.9106260e-02
88	1.0000000e+00	1.0000000e+00	1.0000000e+00	1.0000000e+00	1.0000000e+00	1.0000000e+00	1.0000000e+00	1.0000000e+00	5.8982652e-01	7.0137480e-01	7.8439025e-01	8.4414635e-01	1.4857723e-01	1.7675856e-01	1.9773403e-01	2.1283289e-01	3.6951103e-02	4.3945674e-02	4.9151311e-02	5.2898452e-02
89	1.0000000e+00	1.0000000e+00	1.0000000e+00	1.0000000e+00	1.0000000e+00	1.0000000e+00	1.0000000e+00	1.0000000e+00	6.1645080e-01	7.4291639e-01	8.3825501e-01	9.0710760e-01	1.5534231e-01	1.8731405e-01	2.1142077e-01	2.2883099e-01	3.8623542e-02	4.6555164e-02	5.2534897e-02	5.6853446e-02
90	1.0000000e+00	1.0000000e+00	1.0000000e+00	1.0000000e+00	1.0000000e+00	1.0000000e+00	1.0000000e+00	1.0000000e+00	6.4155429e-01	7.8417194e-01	8.9333784e-01	9.7252802e-01	1.6172787e-01	1.9780821e-01	2.2543217e-01	2.4547196e-01	4.0200978e-02	4.9147552e-02	5.5996154e-02	6.0964290e-02
91	1.0000000e+00	1.0000000e+00	1.0000000e+00	1.0000000e+00	1.0000000e+00	1.0000000e+00	1.0000000e+00	1.0000000e+00	6.6484819e-01	8.2477202e-01	9.4934964e-01	1.0000000e+00	1.6765985e-01	2.0814734e-01	2.3969602e-01	2.6272099e-01	4.1665217e-02	5.1699645e-02	5.9517017e-02	6.5222009e-02
92	1.0000000e+00	1.0000000e+00	1.0000000e+00	1.0000000e+00	1.0000000e+00	1.0000000e+00	1.0000000e+00	1.0000000e+00	6.8608919e-01	8.6433240e-01	1.0000000e+00	1.0000000e+00	1.7307547e-01	2.1823368e-01	2.5412819e-01	2.8053410e-01	4.3000900e-02	5.4187293e-02	6.3076501e-02	6.9615353e-02
93	1.0000000e+00	1.0000000e+00	1.0000000e+00	1.0000000e+00	1.0000000e+00	1.0000000e+00	1.0000000e+00	1.0000000e+00	7.0508695e-01	9.0244148e-01	1.0000000e+00	1.0000000e+00	1.7792516e-01	2.2796205e-01	2.6862702e-01	2.9884920e-01	4.4195980e-02	5.6584597e-02	6.6649363e-02	7.4128633e-02
94	1.0000000e+00	1.0000000e+00	1.0000000e+00	1.0000000e+00	1.0000000e+00	1.0000000e+00	1.0000000e+00	1.0000000e+00	7.2172965e-01	9.3869648e-01	1.0000000e+00	1.0000000e+00	1.8217918e-01	2.3722915e-01	2.8308638e-01	3.1759787e-01	4.5243331e-02	5.8866180e-02	7.0209293e-02	7.8744604e-02
95	1.0000000e+00	1.0000000e+00	1.0000000e+00	1.0000000e+00	1.0000000e+00	1.0000000e+00	1.0000000e+00	1.0000000e+00	7.3598577e-01	9.7270379e-01	1.0000000e+00	1.0000000e+00	1.8582813e-01	2.4593353e-01	2.9739133e-01	3.3669730e-01	4.6140865e-02	6.1007206e-02	7.3727897e-02	8.3442509e-02
96	1.0000000e+00	1.0000000e+00	1.0000000e+00	1.0000000e+00	1.0000000e+00	1.0000000e+00	1.0000000e+00	1.0000000e+00	7.4790937e-01	1.0000000e+00	1.0000000e+00	1.0000000e+00	1.8888441e-01	2.5398511e-01	3.1142482e-01	3.5605787e-01	4.6891879e-02	6.2985702e-02	7.7176313e-02	8.8199938e-02
97	1.0000000e+00	1.0000000e+00	1.0000000e+00	1.0000000e+00	1.0000000e+00	1.0000000e+00	1.0000000e+00	1.0000000e+00	7.5763648e-01	1.0000000e+00	1.0000000e+00	1.0000000e+00	1.9138139e-01	2.6130355e-01	3.2505508e-01	3.7556091e-01	4.7504826e-02	6.4782194e-02	8.0522197e-02	9.2987439e-02
98	1.0000000e+00	1.0000000e+00	1.0000000e+00	1.0000000e+00	1.0000000e+00	1.0000000e+00	1.0000000e+00	1.0000000e+00	7.6537552e-01	1.0000000e+00	1.0000000e+00	1.0000000e+00	1.9337111e-01	2.6782939e-01	3.3814575e-01	3.9507080e-01	4.7992726e-02	6.6382405e-02	8.3732183e-02	9.7771495e-02
99	1.0000000e+00	1.0000000e+00	1.0000000e+00	1.0000000e+00	1.0000000e+00	1.0000000e+00	1.0000000e+00	1.0000000e+00	7.7138657e-01	1.0000000e+00	1.0000000e+00	1.0000000e+00	1.9491907e-01	2.7353315e-01	3.5057101e-01	4.1445781e-01	4.8371877e-02	6.7779453e-02	8.6775559e-02	1.0252004e-01
100	1.0000000e+00	1.0000000e+00	1.0000000e+00	1.0000000e+00	1.0000000e+00	1.0000000e+00	1.0000000e+00	1.0000000e+00	7.7594594e-01	1.0000000e+00	1.0000000e+00	1.0000000e+00	1.9609519e-01	2.7840758e-01	3.6219875e-01	4.3356705e-01	4.8659611e-02	6.8971968e-02	8.9620247e-02	1.0719506e-01
101	1.0000000e+00	1.0000000e+00	1.0000000e+00	1.0000000e+00	1.0000000e+00	1.0000000e+00	1.0000000e+00	1.0000000e+00	7.7932671e-01	1.0000000e+00	1.0000000e+00	1.0000000e+00	1.9696883e-01	2.8247468e-01	3.7291324e-01	4.5224186e-01	4.8873081e-02	6.9965750e-02	9.2238298e-02	1.1175819e-01
102	1.0000000e+00	1.0000000e+00	1.0000000e+00	1.0000000e+00	1.0000000e+00	1.0000000e+00	1.0000000e+00	1.0000000e+00	7.8177492e-01	1.0000000e+00	1.0000000e+00	1.0000000e+00	1.9760265e-01	2.8578678e-01	3.8262072e-01	4.7032159e-01	4.9027755e-02	7.0774010e-02	9.4607239e-02	1.1617023e-01
103	1.0000000e+00	1.0000000e+00	1.0000000e+00	1.0000000e+00	1.0000000e+00	1.0000000e+00	1.0000000e+00	1.0000000e+00	7.8350151e-01	1.0000000e+00	1.0000000e+00	1.0000000e+00	1.9805052e-01	2.8841885e-01	3.9125336e-01	4.8763848e-01	4.9136901e-02	7.1415459e-02	9.6711057e-02	1.2039044e-01
104	1.0000000e+00	1.0000000e+00	1.0000000e+00	1.0000000e+00	1.0000000e+00	1.0000000e+00	1.0000000e+00	1.0000000e+00	7.8468431e-01	1.0000000e+00	1.0000000e+00	1.0000000e+00	1.9835794e-01	2.9045927e-01	3.9877165e-01	5.0401658e-01	4.9211718e-02	7.1912029e-02	9.8540753e-02	1.2437631e-01
105	1.0000000e+00	1.0000000e+00	1.0000000e+00	1.0000000e+00	1.0000000e+00	1.0000000e+00	1.0000000e+00	1.0000000e+00	7.8547018e-01	1.0000000e+00	1.0000000e+00	1.0000000e+00	1.9856263e-01	2.9200502e-01	4.0517799e-01	5.1929860e-01	4.9261459e-02	7.2287662e-02	1.0009757e-01	1.2809002e-01
106	1.0000000e+00	1.0000000e+00	1.0000000e+00	1.0000000e+00	1.0000000e+00	1.0000000e+00	1.0000000e+00	1.0000000e+00	7.8597492e-01	1.0000000e+00	1.0000000e+00	1.0000000e+00	1.9869438e-01	2.9315020e-01	4.1050924e-01	5.3334340e-01	4.9293428e-02	7.2565530e-02	1.0139115e-01	1.3149787e-01
107	1.0000000e+00	1.0000000e+00	1.0000000e+00	1.0000000e+00	1.0000000e+00	1.0000000e+00	1.0000000e+00	1.0000000e+00	7.8628645e-01	1.0000000e+00	1.0000000e+00	1.0000000e+00	1.9877588e-01	2.9397856e-01	4.1483791e-01	5.4603038e-01	4.9313172e-02	7.2766207e-02	1.0243980e-01	1.3457138e-01
108	1.0000000e+00	1.0000000e+00	1.0000000e+00	1.0000000e+00	1.0000000e+00	1.0000000e+00	1.0000000e+00	1.0000000e+00	7.8647196e-01	1.0000000e+00	1.0000000e+00	1.0000000e+00	1.9882453e-01	2.9456233e-01	4.1826869e-01	5.5728259e-01	4.9324938e-02	7.2907395e-02	1.0326956e-01	1.3729281e-01
109	1.0000000e+00	1.0000000e+00	1.0000000e+00	1.0000000e+00	1.0000000e+00	1.0000000e+00	1.0000000e+00	1.0000000e+00	7.8657660e-01	1.0000000e+00	1.0000000e+00	1.0000000e+00	1.9885204e-01	2.9496228e-01	4.2092323e-01	5.6706371e-01	4.9331581e-02	7.3003959e-02	1.0391046e-01	1.3965434e-01
110	1.0000000e+00	1.0000000e+00	1.0000000e+00	1.0000000e+00	1.0000000e+00	1.0000000e+00	1.0000000e+00	1.0000000e+00	7.8663291e-01	1.0000000e+00	1.0000000e+00	1.0000000e+00	1.9886688e-01	2.9522795e-01	4.2292950e-01	5.7537870e-01	4.9335157e-02	7.3067986e-02	1.0439398e-01	1.4165829e-01
111	1.0000000e+00	1.0000000e+00	1.0000000e+00	1.0000000e+00	1.0000000e+00	1.0000000e+00	1.0000000e+00	1.0000000e+00	7.8666173e-01	1.0000000e+00	1.0000000e+00	1.0000000e+00	1.9887450e-01	2.9539858e-01	4.2441266e-01	5.8228336e-01	4.9336989e-02	7.3109033e-02	1.0475076e-01	1.4331921e-01
112	1.0000000e+00	1.0000000e+00	1.0000000e+00	1.0000000e+00	1.0000000e+00	1.0000000e+00	1.0000000e+00	1.0000000e+00	7.8667534e-01	1.0000000e+00	1.0000000e+00	1.0000000e+00	1.9887811e-01	2.9550396e-01	4.2548361e-01	5.8787971e-01	4.9337855e-02	7.3134331e-02	1.0500787e-01	1.4466279e-01
113	1.0000000e+00	1.0000000e+00	1.0000000e+00	1.0000000e+00	1.0000000e+00	1.0000000e+00	1.0000000e+00	1.0000000e+00	7.8668168e-01	1.0000000e+00	1.0000000e+00	1.0000000e+00	1.9887979e-01	2.9556672e-01	4.2623671e-01	5.9230567e-01	4.9338259e-02	7.3149367e-02	1.0518831e-01	1.4572322e-01
114	1.0000000e+00	1.0000000e+00	1.0000000e+00	1.0000000e+00	1.0000000e+00	1.0000000e+00	1.0000000e+00	1.0000000e+00	7.8668334e-01	1.0000000e+00	1.0000000e+00	1.0000000e+00	1.9888023e-01	2.9560213e-01	4.2675158e-01	5.9572291e-01	4.9338365e-02	7.3157835e-02	1.0531141e-01	1.4654023e-01
115	1.0000000e+00	1.0000000e+00	1.0000000e+00	1.0000000e+00	1.0000000e+00	1.0000000e+00	1.0000000e+00	1.0000000e+00	7.8668334e-01	1.0000000e+00	1.0000000e+00	1.0000000e+00	1.9888023e-01	2.9562120e-01	4.2709300e-01	5.9830122e-01	4.9338365e-02	7.3162384e-02	1.0539286e-01	1.4715530e-01
116	1.0000000e+00	1.0000000e+00	1.0000000e+00	1.0000000e+00	1.0000000e+00	1.0000000e+00	1.0000000e+00	1.0000000e+00	7.8668334e-01	1.0000000e+00	1.0000000e+00	1.0000000e+00	1.9888023e-01	2.9563097e-01	4.2731186e-01	6.0020361e-01	4.9338365e-02	7.3164710e-02	1.0544495e-01	1.4760809e-01
117	1.0000000e+00	1.0000000e+00	1.0000000e+00	1.0000000e+00	1.0000000e+00	1.0000000e+00	1.0000000e+00	1.0000000e+00	7.8668334e-01	1.0000000e+00	1.0000000e+00	1.0000000e+00	1.9888023e-01	2.9563559e-01	4.2744678e-01	6.0157480e-01	4.9338365e-02	7.3165806e-02	1.0547698e-01	1.4793366e-01
118	1.0000000e+00	1.0000000e+00	1.0000000e+00	1.0000000e+00	1.0000000e+00	1.0000000e+00	1.0000000e+00	1.0000000e+00	7.8668334e-01	1.0000000e+00	1.0000000e+00	1.0000000e+00	1.9888023e-01	2.9563774e-01	4.2752701e-01	6.0253759e-01	4.9338365e-02	7.3166316e-02	1.0549599e-01	1.4816170e-01
119	1.0000000e+00	1.0000000e+00	1.0000000e+00	1.0000000e+00	1.0000000e+00	1.0000000e+00	1.0000000e+00	1.0000000e+00	7.8668334e-01	1.0000000e+00	1.0000000e+00	1.0000000e+00	1.9888023e-01	2.9563831e-01	4.2757223e-01	6.0319493e-01	4.9338365e-02	7.3166450e-02	1.0550667e-01	1.4831698e-01
120	1.0000000e+00	1.0000000e+00	1.0000000e+00	1.0000000e+00	1.0000000e+00	1.0000000e+00	1.0000000e+00	1.0000000e+00	7.8668334e-01	1.0000000e+00	1.0000000e+00	1.0000000e+00	1.9888023e-01	2.9563831e-01	4.2759655e-01	6.0363028e-01	4.9338365e-02	7.3166450e-02	1.0551240e-01	1.4841954e-01
