# Supplementary material for: Quantifying the Potential for Future Gene Therapy to Lower Lifetime Risk of Polygenic Late-Onset Diseases
Source: MDPI journal article supplement (doi:10.3390/ijms20133352), 2019-07-08
Supplement: s2 [file s2 › SuppFiles/Results/LODsRareMedium/Alzheimers/-1.000/FrailtyAnalysis.csv]

Age	Heritability	MeanOR	CaseOR	nControls	nCases	nCumIncidence	nIncidence	nLifeIncidence0	nAbsIncidence0	nLifeIncidence5	nAbsIncidence5	nLifeIncidence10	nAbsIncidence10	nLifeIncidence15	nAbsIncidence15	nIncActDivExp
38	0.563048	0.23549	1	999999996	4	4e-09	4e-09	3.88982e-09	3.88982e-09	3.91458e-09	3.91458e-09	3.93518e-09	3.93518e-09	3.95314e-09	3.95314e-09	0.00194204
39	0.563048	0.23549	0.783797	999999990	6	1e-08	6e-09	9.716e-09	5.82618e-09	9.77964e-09	5.86506e-09	9.83216e-09	5.89698e-09	9.87781e-09	5.92467e-09	0.0013403
40	0.563048	0.23549	0.826526	999999974	16	2.6e-08	1.6e-08	2.52285e-08	1.55125e-08	2.54008e-08	1.56212e-08	2.55415e-08	1.57094e-08	2.56628e-08	1.5785e-08	0.00218779
41	0.563048	0.23549	0.91165	999999960	14	4e-08	1.4e-08	3.87798e-08	1.35514e-08	3.90522e-08	1.36513e-08	3.92728e-08	1.37313e-08	3.94622e-08	1.37993e-08	0.00131546
42	0.563048	0.23549	0.980413	999999917	43	8.3e-08	4.3e-08	8.03301e-08	4.15503e-08	8.0926e-08	4.18738e-08	8.14016e-08	4.21288e-08	8.18062e-08	4.2344e-08	0.00295528
43	0.563048	0.23549	0.921961	999999882	35	1.18e-07	3.5e-08	1.14088e-07	3.37575e-08	1.14962e-07	3.40359e-08	1.15654e-07	3.42526e-08	1.16239e-07	3.44328e-08	0.00182897
44	0.563048	0.23549	0.833051	999999811	71	1.89e-07	7.1e-08	1.82431e-07	6.83439e-08	1.83905e-07	6.89431e-08	1.85057e-07	6.94032e-08	1.8602e-07	6.97809e-08	0.00289569
45	0.563048	0.23549	0.894466	999999726	85	2.74e-07	8.5e-08	2.64076e-07	8.16442e-08	2.66315e-07	8.24101e-08	2.68045e-07	8.29876e-08	2.69476e-07	8.3456e-08	0.00275646
46	0.563048	0.23549	0.875702	999999615	111	3.85e-07	1.11e-07	3.70444e-07	1.06368e-07	3.73758e-07	1.07443e-07	3.76281e-07	1.08236e-07	3.78345e-07	1.08869e-07	0.00290187
47	0.563048	0.23549	0.82493	999999446	169	5.54e-07	1.69e-07	5.31978e-07	1.61534e-07	5.3706e-07	1.63302e-07	5.40854e-07	1.64574e-07	5.43921e-07	1.65576e-07	0.00359931
48	0.563048	0.23549	0.864293	999999237	209	7.63e-07	2.09e-07	7.31189e-07	1.99211e-07	7.38641e-07	2.01581e-07	7.44098e-07	2.03243e-07	7.48458e-07	2.04537e-07	0.00365597
49	0.563048	0.23549	0.837323	999998972	265	1.028e-06	2.65e-07	9.83002e-07	2.51814e-07	9.93727e-07	2.55087e-07	1.00142e-06	2.57323e-07	1.0075e-06	2.5904e-07	0.00383205
50	0.563048	0.23549	0.845505	999998640	332	1.36e-06	3.32e-07	1.29742e-06	3.14418e-07	1.31262e-06	3.18893e-07	1.3233e-06	3.21884e-07	1.33164e-06	3.2414e-07	0.00398934
51	0.563048	0.23549	0.834463	999998228	412	1.772e-06	4.12001e-07	1.68616e-06	3.88737e-07	1.70743e-06	3.94808e-07	1.7221e-06	3.98798e-07	1.73338e-06	4.0174e-07	0.00413105
52	0.563048	0.23549	0.841333	999997616	612	2.384e-06	6.12001e-07	2.26124e-06	5.75088e-07	2.29239e-06	5.84966e-07	2.31347e-06	5.91367e-07	2.32935e-06	5.95973e-07	0.00513811
53	0.563048	0.23549	0.847977	999996868	748	3.132e-06	7.48002e-07	2.96099e-06	6.99748e-07	3.00536e-06	7.12965e-07	3.03491e-06	7.21448e-07	3.05675e-06	7.27398e-07	0.00527313
54	0.563049	0.235489	0.84951	999995933	935	4.067e-06	9.35003e-07	3.83141e-06	8.70422e-07	3.89383e-06	8.88477e-07	3.93494e-06	9.00024e-07	3.96466e-06	9.07916e-07	0.00554763
55	0.563049	0.235489	0.848917	999994778	1155	5.222e-06	1.155e-06	4.90092e-06	1.06952e-06	4.98766e-06	1.09384e-06	5.04434e-06	1.10941e-06	5.08447e-06	1.11981e-06	0.00577899
56	0.563049	0.235488	0.831563	999993208	1570	6.792e-06	1.57001e-06	6.34633e-06	1.44542e-06	6.46901e-06	1.48136e-06	6.54882e-06	1.50449e-06	6.60415e-06	1.5197e-06	0.00663513
57	0.563049	0.235488	0.855266	999991220	1988	8.78e-06	1.98801e-06	8.16514e-06	1.81881e-06	8.3371e-06	1.86811e-06	8.449e-06	1.90019e-06	8.52513e-06	1.92099e-06	0.00710621
58	0.56305	0.235487	0.85104	999988610	2610	1.139e-05	2.61002e-06	1.05368e-05	2.3717e-06	1.07787e-05	2.44165e-06	1.09367e-05	2.48777e-06	1.10425e-05	2.51737e-06	0.0079001
59	0.56305	0.235486	0.85655	999985477	3133	1.4523e-05	3.13304e-06	1.33629e-05	2.82614e-06	1.36953e-05	2.91664e-06	1.39139e-05	2.97714e-06	1.40583e-05	3.01583e-06	0.00803794
60	0.563051	0.235485	0.843011	999981282	4195	1.8718e-05	4.19506e-06	1.71174e-05	3.75454e-06	1.75798e-05	3.88456e-06	1.78867e-05	3.97289e-06	1.80877e-05	4.02944e-06	0.0091299
61	0.563051	0.235483	0.848103	999975887	5395	2.4113e-05	5.3951e-06	2.19055e-05	4.78818e-06	2.25467e-05	4.96697e-06	2.29771e-05	5.09047e-06	2.32575e-05	5.16996e-06	0.00996734
62	0.563052	0.235481	0.846657	999969164	6723	3.0836e-05	6.72316e-06	2.78188e-05	5.91346e-06	2.86975e-05	6.15095e-06	2.92946e-05	6.31765e-06	2.96835e-05	6.42617e-06	0.0105503
63	0.563053	0.235478	0.85682	999960319	8845	3.9681e-05	8.84527e-06	3.55238e-05	7.70521e-06	3.67349e-05	8.03761e-06	3.7569e-05	8.27466e-06	3.81142e-05	8.43096e-06	0.0117961
64	0.563055	0.235475	0.859411	999949070	11249	5.093e-05	1.12494e-05	4.5222e-05	9.6986e-06	4.6882e-05	1.01475e-05	4.8041e-05	1.04724e-05	4.88035e-05	1.06897e-05	0.0127552
65	0.563057	0.235471	0.853819	999934646	14424	6.5354e-05	1.44247e-05	5.75204e-05	1.2299e-05	5.97913e-05	1.291e-05	6.13974e-05	1.33571e-05	6.24636e-05	1.36608e-05	0.0139111
66	0.563059	0.235465	0.858365	999916029	18617	8.3971e-05	1.86182e-05	7.32065e-05	1.56872e-05	7.6314e-05	1.65238e-05	7.85371e-05	1.71408e-05	8.00294e-05	1.75669e-05	0.015277
67	0.563063	0.235458	0.855267	999892107	23922	0.000107893	2.3924e-05	9.31064e-05	1.99015e-05	9.7355e-05	2.10427e-05	0.000100423	2.18878e-05	0.000102509	2.2481e-05	0.0167075
68	0.563067	0.235448	0.855534	999861255	30852	0.000138745	3.08553e-05	0.000118419	2.53154e-05	0.00012423	2.68784e-05	0.000128458	2.80379e-05	0.00013137	2.88649e-05	0.0183444
69	0.563072	0.235436	0.851748	999821642	39613	0.000178358	3.96185e-05	0.000150437	3.2022e-05	0.000158382	3.41567e-05	0.000164191	3.57377e-05	0.000168247	3.6882e-05	0.0200576
70	0.563079	0.235421	0.855904	999770367	51275	0.000229633	5.12841e-05	0.000191211	4.07817e-05	0.000202101	4.37267e-05	0.000210081	4.58988e-05	0.000215727	4.74884e-05	0.0221144
71	0.563088	0.235401	0.85534	999703939	66428	0.000296061	6.64433e-05	0.000243106	5.19071e-05	0.000258072	5.59831e-05	0.000269036	5.89687e-05	0.000276884	6.11707e-05	0.0244093
72	0.5631	0.235374	0.856032	999617022	86917	0.000382978	8.69427e-05	0.0003097	6.66134e-05	0.000330375	7.23246e-05	0.000345486	7.64718e-05	0.000356403	7.9543e-05	0.0272174
73	0.563115	0.23534	0.853765	999504136	112886	0.000495864	0.000112929	0.000394362	8.46941e-05	0.000422993	9.26534e-05	0.000443822	9.83738e-05	0.000458982	0.000102618	0.0301322
74	0.563135	0.235295	0.853375	999356973	147163	0.000643027	0.000147236	0.000502174	0.000107866	0.000541939	0.000119005	0.000570697	0.000126938	0.000591729	0.000132814	0.033493
75	0.563161	0.235237	0.853782	999163393	193580	0.000836607	0.000193705	0.000640403	0.000138318	0.000695875	0.000154036	0.00073575	0.000165159	0.000764981	0.000173364	0.0375755
76	0.563196	0.23516	0.853275	998910076	253317	0.00108992	0.000253529	0.000816291	0.000176035	0.000893773	0.000198063	0.000949187	0.000213616	0.000989801	0.000225008	0.0419507
77	0.563241	0.235059	0.85239	998576390	333686	0.00142361	0.00033405	0.00104096	0.000224911	0.00114943	0.000255941	0.00122677	0.000277885	0.0012833	0.000293819	0.047163
78	0.563301	0.234925	0.85422	998136762	439628	0.00186324	0.000440255	0.00132706	0.000286507	0.00147914	0.00033018	0.00158746	0.000361209	0.00166626	0.00038351	0.0530544
79	0.56338	0.234748	0.85269	997554207	582555	0.00244579	0.000583642	0.00169218	0.000365804	0.00190593	0.000427579	0.00205832	0.000471735	0.00216851	0.000503182	0.0600563
80	0.563485	0.234513	0.853388	996779955	774252	0.00322004	0.00077615	0.00215768	0.000466645	0.00245879	0.000554222	0.00267401	0.000617202	0.00282866	0.000661773	0.0682248
81	0.563625	0.234199	0.852906	995745516	1034439	0.00425448	0.00103778	0.00275163	0.000595868	0.00317705	0.000720573	0.00348214	0.00081074	0.00370025	0.000874403	0.0779659
82	0.563813	0.233776	0.852503	994356799	1388717	0.0056432	0.00139465	0.00350917	0.000760775	0.00411205	0.000938997	0.00454614	0.00106855	0.00485547	0.00116016	0.0896021
83	0.564067	0.233207	0.851541	992484785	1872014	0.00751521	0.00188264	0.00447358	0.000969888	0.00533031	0.00122517	0.00595011	0.00141193	0.00639138	0.00154462	0.103505
84	0.564412	0.232434	0.85145	989945684	2539101	0.0100543	0.00255833	0.00570091	0.00123662	0.00692172	0.00160346	0.00781026	0.00187424	0.00844363	0.00206779	0.120456
85	0.564882	0.231376	0.85055	986478825	3466859	0.0135212	0.00350207	0.00726205	0.001577	0.00900609	0.00210555	0.0102858	0.00250071	0.0112005	0.00278488	0.141337
86	0.56553	0.229917	0.849901	981705713	4773112	0.0182943	0.00483853	0.00924857	0.00201375	0.0117467	0.00277817	0.0136	0.00335959	0.0149294	0.00377998	0.167553
87	0.566428	0.227886	0.848863	975079816	6625897	0.0249202	0.00674937	0.0117746	0.0025731	0.0153611	0.00368175	0.0180611	0.00454425	0.020006	0.0051712	0.20078
88	0.567692	0.22502	0.847172	965770759	9309057	0.0342292	0.00954697	0.0149925	0.0033001	0.0201569	0.00491836	0.0241192	0.00621293	0.0269875	0.00715999	0.244305
89	0.569484	0.220925	0.845343	952553081	13217678	0.0474469	0.0136861	0.0190872	0.0042399	0.0265459	0.00661547	0.0324035	0.00857793	0.0366709	0.0100265	0.301742
90	0.572061	0.214977	0.842427	933517455	19035626	0.0664825	0.0199838	0.0243031	0.00547566	0.0351178	0.0089988	0.0438483	0.0120149	0.0502636	0.0142697	0.380277
91	0.575801	0.206201	0.838601	905783330	27734125	0.0942167	0.0297093	0.0309256	0.00709413	0.0466604	0.0123647	0.0597726	0.0170583	0.0695205	0.0206283	0.488956
92	0.581245	0.193069	0.832487	864997241	40786089	0.135003	0.0450285	0.0392743	0.00921711	0.0622095	0.0171665	0.0820212	0.0245628	0.0969811	0.030317	0.64244
93	0.589017	0.173354	0.823361	805197193	59800048	0.194803	0.0691332	0.049579	0.011913	0.0828806	0.0238973	0.112829	0.0356157	0.135898	0.0449902	0.857326
94	0.599267	0.14443	0.807913	719827238	85369955	0.280173	0.106024	0.0617195	0.0150776	0.109328	0.0328456	0.154094	0.0512487	0.189404	0.0664514	1.14622
95	0.609525	0.104897	0.780304	605106312	114720926	0.394894	0.159373	0.0748969	0.0183064	0.140762	0.043669	0.205753	0.0717664	0.258378	0.0958197	1.50707
96	0.60683	0.0599371	0.724864	469240709	135865603	0.530759	0.224532	0.0872118	0.0203516	0.173205	0.0536148	0.262299	0.0934479	0.336388	0.128921	1.86407
97	0.552553	0.0264724	0.592319	345859983	123380726	0.65414	0.262937	0.0958287	0.0183635	0.19846	0.0538219	0.309336	0.100241	0.403692	0.143431	1.92435
98	0.520095	0.0172562	0.21846	287554838	58305145	0.712445	0.16858	0.098892	0.0088572	0.208507	0.0290497	0.329491	0.0582731	0.433729	0.0868483	1.09254
99	0.497014	0.0117111	0.109594	237709142	49845696	0.762291	0.173343	0.100816	0.00669018	0.215596	0.0246511	0.344933	0.0537009	0.457823	0.0837889	0.999667
100	0.473486	0.00777747	0.0643131	191652970	46056172	0.808347	0.19375	0.102092	0.00536978	0.220886	0.0222551	0.357552	0.0530885	0.478562	0.0872466	0.999516
101	0.449675	0.00505732	0.0372785	150359853	41293117	0.84964	0.215458	0.102896	0.00419496	0.224629	0.0195291	0.367412	0.0514481	0.495748	0.0896714	0.999855
102	0.425827	0.00322507	0.021351	114571988	35787865	0.885428	0.238015	0.103375	0.00318107	0.227128	0.016623	0.374738	0.0487204	0.509392	0.0907396	0.999451
103	0.402145	0.00201947	0.0120996	84614800	29957188	0.915385	0.26147	0.103642	0.00233755	0.228702	0.0137377	0.3799	0.0450566	0.519747	0.0903825	0.999591
104	0.378779	0.00124316	0.00679459	60443934	24170866	0.939556	0.285658	0.103783	0.0016611	0.229635	0.011025	0.383338	0.0406234	0.527235	0.0884953	1.00051
105	0.355971	0.000754313	0.0037837	41718314	18725620	0.958282	0.309801	0.103852	0.00113697	0.230154	0.00858615	0.385488	0.0355853	0.532366	0.0848872	1.00048
106	0.333911	0.000452456	0.00209473	27804381	13913933	0.972196	0.333521	0.103883	0.000747087	0.230425	0.00649365	0.38675	0.0302303	0.535688	0.0796398	0.999485
107	0.312732	0.000268895	0.00115565	17881499	9922882	0.982119	0.356882	0.103896	0.0004693	0.230557	0.00476973	0.387443	0.0249246	0.53772	0.073052	0.998752
108	0.292509	0.000158443	0.000636117	11077127	6804372	0.988923	0.380526	0.103901	0.000283492	0.230618	0.0034019	0.3878	0.0199928	0.538892	0.0655722	1.00066
109	0.273403	9.29884e-05	0.000349954	6622959	4454168	0.993377	0.402105	0.103903	0.000160842	0.230644	0.00233824	0.387972	0.0155192	0.539526	0.0571834	0.999542
110	0.255278	5.44146e-05	0.000192906	3818798	2804161	0.996181	0.4234	0.103903	8.6797e-05	0.230654	0.00155388	0.38805	0.0117345	0.539848	0.0486338	1.00057
111	0.238542	3.18621e-05	0.000106581	2126133	1692665	0.997874	0.443245	0.103903	4.43245e-05	0.230658	0.00099287	0.388083	0.00862999	0.540001	0.0401758	1.00117
112	0.223148	1.871e-05	5.93036e-05	1144984	981149	0.998855	0.461471	0.103904	2.07662e-05	0.23066	0.000606835	0.388096	0.00616756	0.54007	0.0322291	1.00127
113	0.208665	1.10185e-05	3.33415e-05	597447	547537	0.999403	0.478205	0.103904	9.5641e-06	0.23066	0.000356263	0.388101	0.00427515	0.540098	0.0251249	1.00131
114	0.195471	6.562e-06	1.88393e-05	303847	293600	0.999696	0.491424	0.103904	2.45712e-06	0.23066	0.00019657	0.388102	0.00285763	0.54011	0.0189665	0.997244
115	0.182815	3.88897e-06	1.08034e-05	148268	155579	0.999852	0.512031	0.103904	0	0.23066	0.000104966	0.388103	0.00187915	0.540114	0.0141909	1.01088
116	0.170997	2.32686e-06	6.17227e-06	70205	78063	0.99993	0.526499	0.103904	0	0.23066	5.26499e-05	0.388103	0.00117936	0.540116	0.0102509	1.01475
117	0.160608	1.41135e-06	3.58653e-06	32569	37636	0.999967	0.536087	0.103904	0	0.23066	2.41239e-05	0.388103	0.000704955	0.540116	0.00716481	1.01181
118	0.150687	8.55599e-07	2.11137e-06	14523	18046	0.999985	0.554085	0.103904	0	0.23066	1.10817e-05	0.388103	0.000412793	0.540116	0.00495352	1.02691
119	0.140588	5.20406e-07	1.25108e-06	6291	8232	0.999994	0.566825	0.103904	0	0.23066	2.83413e-06	0.388103	0.00022673	0.540116	0.00329609	1.03408
120	0.132321	3.30068e-07	7.56229e-07	2836	3455	0.999997	0.549197	0.103904	0	0.23066	0	0.388103	0.000112585	0.540116	0.00201555	0.98835
