# Supplementary material for: Quantifying the Potential for Future Gene Therapy to Lower Lifetime Risk of Polygenic Late-Onset Diseases
Source: MDPI journal article supplement (doi:10.3390/ijms20133352), 2019-07-08
Supplement: s2 [file s2 › SuppFiles/Results/LODsRareMedium/Alzheimers/-1.000/IndividualsByBetaDistrib.csv]

nEntry	Beta	nDetrimentalCount	nFractionPopulation	nCumulativeFractionPopulation	nEditsNeeded	nIndividuals
0	-19.8	0	0	1	0	0
1	-19.6	0	0	1	0	0
2	-19.4	0	0	1	0	0
3	-19.2	0	0	1	0	0
4	-19	0	0	1	0	0
5	-18.8	0	0	1	0	0
6	-18.6	0	0	1	0	0
7	-18.4	0	0	1	0	0
8	-18.2	18	2e-09	1	0	2
9	-18	20	1e-09	1	0	1
10	-17.8	20.4	5e-09	1	0	5
11	-17.6	21.333	3e-09	0.99999999	0	3
12	-17.4	21.333	3e-09	0.99999999	0	3
13	-17.2	21.722	1.8e-08	0.99999999	0	18
14	-17	22.455	2.2e-08	0.99999997	0	22
15	-16.8	22.727	2.2e-08	0.99999995	0	22
16	-16.6	22.804	4.6e-08	0.99999992	0	46
17	-16.4	23.044	6.8e-08	0.99999988	0	68
18	-16.2	23.44	8.4e-08	0.99999981	0	84
19	-16	24.116	1.12e-07	0.99999973	0	112
20	-15.8	24.349	1.95e-07	0.99999961	0	195
21	-15.6	24.805	2.97e-07	0.99999942	0	297
22	-15.4	24.957	3.5e-07	0.99999912	0	350
23	-15.2	25.452	5.2e-07	0.99999877	0	520
24	-15	25.88	6.84e-07	0.99999825	0	684
25	-14.8	26.308	9.26e-07	0.99999757	0	926
26	-14.6	26.634	1.337e-06	0.99999664	0	1337
27	-14.4	27.056	1.839e-06	0.99999531	0	1839
28	-14.2	27.478	2.545e-06	0.99999347	0	2545
29	-14	27.916	3.379e-06	0.99999092	0	3379
30	-13.8	28.285	4.496e-06	0.99998754	0	4496
31	-13.6	28.72	5.859e-06	0.99998305	0	5859
32	-13.4	29.069	7.892e-06	0.99997719	0	7892
33	-13.2	29.441	1.0281e-05	0.99996929	0	10281
34	-13	29.866	1.3634e-05	0.99995901	0	13634
35	-12.8	30.255	1.736e-05	0.99994538	0	17360
36	-12.6	30.639	2.263e-05	0.99992802	0	22630
37	-12.4	31.015	2.8639e-05	0.99990539	0	28639
38	-12.2	31.415	3.6842e-05	0.99987675	0	36842
39	-12	31.819	4.6429e-05	0.99983991	0	46429
40	-11.8	32.183	5.8705e-05	0.99979348	0	58705
41	-11.6	32.574	7.3415e-05	0.99973477	0	73415
42	-11.4	32.967	9.2194e-05	0.99966136	0	92194
43	-11.2	33.354	0.000113605	0.99956917	0	113605
44	-11	33.736	0.000140524	0.99945556	0	140524
45	-10.8	34.128	0.00017306	0.99931504	0	173060
46	-10.6	34.518	0.000210949	0.99914198	0	210949
47	-10.4	34.908	0.000256721	0.99893103	0	256721
48	-10.2	35.285	0.000310955	0.99867431	0	310955
49	-10	35.68	0.000374005	0.99836335	0	374005
50	-9.8	36.061	0.000447475	0.99798935	0	447475
51	-9.6	36.449	0.000534338	0.99754187	0	534338
52	-9.4	36.829	0.00063247	0.99700753	0	632470
53	-9.2	37.211	0.00074798	0.99637506	0	747980
54	-9	37.594	0.000878935	0.99562708	0	878935
55	-8.8	37.982	0.00102928	0.99474815	0	1029280
56	-8.6	38.359	0.001196706	0.99371887	0	1196706
57	-8.4	38.746	0.001391248	0.99252216	0	1391248
58	-8.2	39.126	0.001607075	0.99113091	0	1607075
59	-8	39.511	0.001847414	0.98952384	0	1847414
60	-7.8	39.891	0.002112623	0.98767643	0	2112623
61	-7.6	40.273	0.002414126	0.9855638	0	2414126
62	-7.4	40.652	0.00273278	0.98314968	0	2732780
63	-7.2	41.036	0.003095995	0.9804169	0	3095995
64	-7	41.411	0.003474656	0.9773209	0	3474656
65	-6.8	41.792	0.003909648	0.97384625	0	3909648
66	-6.6	42.17	0.004359971	0.9699366	0	4359971
67	-6.4	42.551	0.004852488	0.96557663	0	4852488
68	-6.2	42.933	0.005371863	0.96072414	0	5371863
69	-6	43.31	0.005936352	0.95535228	0	5936352
70	-5.8	43.688	0.006519545	0.94941592	0	6519545
71	-5.6	44.066	0.007146216	0.94289638	0	7146216
72	-5.4	44.445	0.007786246	0.93575016	0	7786246
73	-5.2	44.821	0.008485381	0.92796392	0	8485381
74	-5	45.198	0.009172481	0.91947854	0	9172481
75	-4.8	45.576	0.009901675	0.91030605	0	9901675
76	-4.6	45.956	0.010632404	0.90040438	0	10632404
77	-4.4	46.329	0.011408755	0.88977198	0	11408755
78	-4.2	46.706	0.012146406	0.87836322	0	12146406
79	-4	47.08	0.012937634	0.86621682	0	12937634
80	-3.8	47.461	0.013704984	0.85327918	0	13704984
81	-3.6	47.832	0.014474832	0.8395742	0	14474832
82	-3.4	48.212	0.015227796	0.82509937	0	15227796
83	-3.2	48.582	0.015973782	0.80987157	0	15973782
84	-3	48.96	0.016694759	0.79389779	0	16694759
85	-2.8	49.33	0.017398415	0.77720303	0	17398415
86	-2.6	49.711	0.018064634	0.75980461	0	18064634
87	-2.4	50.081	0.018684951	0.74173998	0	18684951
88	-2.2	50.459	0.019262611	0.72305503	0	19262611
89	-2	50.829	0.019814347	0.70379242	0	19814347
90	-1.8	51.207	0.020284719	0.68397807	0	20284719
91	-1.6	51.575	0.020725769	0.66369335	0	20725769
92	-1.4	51.953	0.021097957	0.64296758	0	21097957
93	-1.2	52.322	0.021398344	0.62186962	0	21398344
94	-1	52.698	0.021685163	0.60047128	0	21685163
95	-0.8	53.067	0.021855934	0.57878612	0	21855934
96	-0.6	53.444	0.021951652	0.55693018	0	21951652
97	-0.4	53.811	0.021999757	0.53497853	0	21999757
98	-0.2	54.186	0.022024268	0.51297877	0	22024268
99	0	54.555	0.021913089	0.49095451	0	21913089
100	0.2	54.93	0.021783015	0.46904142	0.37579	21783015
101	0.4	55.3	0.021556177	0.4472584	0.74553	21556177
102	0.6	55.673	0.021304291	0.42570223	1.1182	21304291
103	0.8	56.041	0.020953867	0.40439793	1.4863	20953867
104	1	56.414	0.020569246	0.38344407	1.8598	20569246
105	1.2	56.784	0.020129152	0.36287482	2.2291	20129152
106	1.4	57.156	0.019670776	0.34274567	2.601	19670776
107	1.6	57.524	0.019131782	0.32307489	2.9696	19131782
108	1.8	57.896	0.018559393	0.30394311	3.3411	18559393
109	2	58.265	0.017951919	0.28538372	3.7107	17951919
110	2.2	58.635	0.017355038	0.2674318	4.08	17355038
111	2.4	59.005	0.016662134	0.25007676	4.4502	16662134
112	2.6	59.373	0.0160284	0.23341463	4.8185	16028400
113	2.8	59.744	0.015320743	0.21738623	5.1894	15320743
114	3	60.111	0.01462949	0.20206548	5.5566	14629490
115	3.2	60.483	0.013925228	0.18743599	5.9286	13925228
116	3.4	60.85	0.013227135	0.17351077	6.2956	13227135
117	3.6	61.22	0.012511878	0.16028363	6.6653	12511878
118	3.8	61.586	0.011818788	0.14777175	7.0309	11818788
119	4	61.959	0.011131751	0.13595297	7.4042	11131751
120	4.2	62.324	0.010463834	0.12482121	7.7691	10463834
121	4.4	62.694	0.009796107	0.11435738	8.1391	9796107
122	4.6	63.059	0.009157683	0.10456127	8.5044	9157683
123	4.8	63.432	0.00853144	0.095403591	8.8773	8531440
124	5	63.794	0.007942634	0.086872151	9.2395	7942634
125	5.2	64.164	0.007350862	0.078929517	9.6089	7350862
126	5.4	64.529	0.006805986	0.071578655	9.9739	6805986
127	5.6	64.902	0.006280474	0.064772669	10.347	6280474
128	5.8	65.263	0.005785353	0.058492195	10.708	5785353
129	6	65.632	0.005300861	0.052706842	11.078	5300861
130	6.2	65.999	0.004861711	0.047405981	11.445	4861711
131	6.4	66.368	0.004439072	0.04254427	11.814	4439072
132	6.6	66.729	0.004045365	0.038105198	12.175	4045365
133	6.8	67.1	0.003682337	0.034059833	12.545	3682337
134	7	67.465	0.003338205	0.030377496	12.91	3338205
135	7.2	67.831	0.003019954	0.027039291	13.277	3019954
136	7.4	68.194	0.002730837	0.024019337	13.639	2730837
137	7.6	68.564	0.002455328	0.0212885	14.01	2455328
138	7.8	68.925	0.002208334	0.018833172	14.37	2208334
139	8	69.294	0.001975342	0.016624838	14.739	1975342
140	8.2	69.658	0.001769178	0.014649496	15.103	1769178
141	8.4	70.027	0.001576697	0.012880318	15.473	1576697
142	8.6	70.389	0.001408375	0.011303621	15.835	1408375
143	8.8	70.758	0.001248105	0.009895246	16.203	1248105
144	9	71.12	0.001105317	0.008647141	16.565	1105317
145	9.2	71.486	0.000979313	0.007541824	16.931	979313
146	9.4	71.849	0.000860487	0.006562511	17.294	860487
147	9.6	72.22	0.000758867	0.005702024	17.665	758867
148	9.8	72.582	0.000666124	0.004943157	18.027	666124
149	10	72.944	0.000584568	0.004277033	18.389	584568
150	10.2	73.312	0.000509897	0.003692465	18.757	509897
151	10.4	73.671	0.000444818	0.003182568	19.116	444818
152	10.6	74.037	0.000388089	0.00273775	19.483	388089
153	10.8	74.392	0.000337177	0.002349661	19.837	337177
154	11	74.767	0.00029066	0.002012484	20.212	290660
155	11.2	75.129	0.000252164	0.001721824	20.574	252164
156	11.4	75.499	0.00021742	0.00146966	20.944	217420
157	11.6	75.851	0.000187939	0.00125224	21.296	187939
158	11.8	76.21	0.000161742	0.001064301	21.655	161742
159	12	76.579	0.000137932	0.000902559	22.024	137932
160	12.2	76.942	0.000118725	0.000764627	22.387	118725
161	12.4	77.297	0.000101358	0.000645902	22.743	101358
162	12.6	77.669	8.5789e-05	0.000544544	23.114	85789
163	12.8	78.036	7.2866e-05	0.000458755	23.481	72866
164	13	78.407	6.2396e-05	0.000385889	23.852	62396
165	13.2	78.76	5.2813e-05	0.000323493	24.206	52813
166	13.4	79.142	4.4557e-05	0.00027068	24.587	44557
167	13.6	79.481	3.7873e-05	0.000226123	24.926	37873
168	13.8	79.84	3.1777e-05	0.00018825	25.285	31777
169	14	80.213	2.6369e-05	0.000156473	25.659	26369
170	14.2	80.583	2.242e-05	0.000130104	26.028	22420
171	14.4	80.931	1.8623e-05	0.000107684	26.376	18623
172	14.6	81.27	1.5616e-05	8.9061e-05	26.715	15616
173	14.8	81.65	1.2877e-05	7.3445e-05	27.096	12877
174	15	82.005	1.0732e-05	6.0568e-05	27.451	10732
175	15.2	82.372	8.954e-06	4.9836e-05	27.817	8954
176	15.4	82.735	7.256e-06	4.0882e-05	28.18	7256
177	15.6	83.097	6.118e-06	3.3626e-05	28.543	6118
178	15.8	83.511	5.01e-06	2.7508e-05	28.956	5010
179	16	83.784	4.184e-06	2.2498e-05	29.229	4184
180	16.2	84.222	3.363e-06	1.8314e-05	29.667	3363
181	16.4	84.502	2.81e-06	1.4951e-05	29.947	2810
182	16.6	84.956	2.229e-06	1.2141e-05	30.402	2229
183	16.8	85.25	1.895e-06	9.912e-06	30.695	1895
184	17	85.651	1.555e-06	8.017e-06	31.096	1555
185	17.2	86.027	1.254e-06	6.462e-06	31.472	1254
186	17.4	86.307	1.016e-06	5.208e-06	31.752	1016
187	17.6	86.762	8.27e-07	4.192e-06	32.207	827
188	17.8	86.996	6.88e-07	3.365e-06	32.441	688
189	18	87.442	5.38e-07	2.677e-06	32.888	538
190	18.2	87.82	4.27e-07	2.139e-06	33.265	427
191	18.4	88.116	3.63e-07	1.712e-06	33.561	363
192	18.6	88.493	2.98e-07	1.349e-06	33.939	298
193	18.8	88.807	1.92e-07	1.051e-06	34.253	192
194	19	89.21	1.76e-07	8.59e-07	34.656	176
195	19.2	89.42	1.74e-07	6.83e-07	34.865	174
196	19.4	89.918	9.7e-08	5.09e-07	35.363	97
197	19.6	90.363	9.1e-08	4.12e-07	35.808	91
198	19.8	91.089	5.6e-08	3.21e-07	36.535	56
199	20	92.279	2.65e-07	2.65e-07	37.725	265
