# Supplementary material for: Quantifying the Potential for Future Gene Therapy to Lower Lifetime Risk of Polygenic Late-Onset Diseases
Source: MDPI journal article supplement (doi:10.3390/ijms20133352), 2019-07-08
Supplement: s2 [file s2 › SuppFiles/Results/LODsRareMedium/Alzheimers/0.250/FrailtyAnalysis.csv]

Age	Heritability	MeanOR	CaseOR	nControls	nCases	nCumIncidence	nIncidence	nLifeIncidence0	nAbsIncidence0	nLifeIncidence5	nAbsIncidence5	nLifeIncidence10	nAbsIncidence10	nLifeIncidence15	nAbsIncidence15	nIncActDivExp
38	0.799742	0.249979	46189.6	999999248	752	7.52e-07	7.52e-07	7.31286e-07	7.31286e-07	7.35941e-07	7.35941e-07	7.39814e-07	7.39814e-07	7.4319e-07	7.4319e-07	0.365104
39	0.79974	0.249975	29220.9	999997567	1681	2.433e-06	1.681e-06	2.36359e-06	1.6323e-06	2.37914e-06	1.64319e-06	2.39195e-06	1.65214e-06	2.40309e-06	1.6599e-06	0.375508
40	0.799736	0.249967	19409.4	999994756	2811	5.244e-06	2.81101e-06	5.08894e-06	2.72535e-06	5.12358e-06	2.74445e-06	5.15189e-06	2.75994e-06	5.17632e-06	2.77323e-06	0.384369
41	0.79973	0.249955	16058.3	999990554	4202	9.446e-06	4.20202e-06	9.15628e-06	4.06735e-06	9.22093e-06	4.09735e-06	9.27323e-06	4.12134e-06	9.31808e-06	4.14176e-06	0.394828
42	0.799722	0.249939	13534.3	999984744	5810	1.5256e-05	5.81005e-06	1.47704e-05	5.61412e-06	1.48788e-05	5.65784e-06	1.49655e-05	5.69229e-06	1.50395e-05	5.72137e-06	0.39931
43	0.799712	0.249919	10932.6	999977047	7697	2.2953e-05	7.69712e-06	2.21942e-05	7.42376e-06	2.23638e-05	7.48499e-06	2.24982e-05	7.53263e-06	2.26117e-05	7.57227e-06	0.402222
44	0.799699	0.249892	8793.54	999967067	9980	3.2933e-05	9.98023e-06	3.18008e-05	9.60665e-06	3.20546e-05	9.69088e-06	3.22537e-05	9.75555e-06	3.24204e-05	9.80864e-06	0.407038
45	0.799684	0.24986	7588.33	999954528	12539	4.5472e-05	1.25394e-05	4.38448e-05	1.2044e-05	4.42116e-05	1.21569e-05	4.44958e-05	1.22421e-05	4.47316e-05	1.23112e-05	0.40664
46	0.799665	0.249819	6921.92	999938568	15960	6.1432e-05	1.59607e-05	5.91388e-05	1.5294e-05	5.96601e-05	1.54486e-05	6.00584e-05	1.55625e-05	6.03852e-05	1.56536e-05	0.41726
47	0.799643	0.24977	5977.98	999919025	19543	8.0975e-05	1.95442e-05	7.78184e-05	1.86797e-05	7.85442e-05	1.88841e-05	7.90895e-05	1.90312e-05	7.95323e-05	1.91471e-05	0.416246
48	0.799616	0.24971	5064.76	999894902	24123	0.000105098	2.4125e-05	0.000100812	2.29931e-05	0.000101811	2.32666e-05	0.000102548	2.34585e-05	0.00010314	2.36079e-05	0.42201
49	0.799584	0.249638	4460.45	999865228	29674	0.000134772	2.96771e-05	0.000129009	2.81974e-05	0.000130375	2.85639e-05	0.000131362	2.88143e-05	0.000132147	2.90066e-05	0.429147
50	0.799546	0.249552	4036.01	999829667	35561	0.000170333	3.55658e-05	0.000162687	3.36777e-05	0.000164532	3.41571e-05	0.00016584	3.44775e-05	0.000166866	3.47191e-05	0.427361
51	0.799502	0.249449	3492.89	999786338	43329	0.000213662	4.33364e-05	0.000203569	4.08824e-05	0.000206053	4.15209e-05	0.00020778	4.19405e-05	0.000209116	4.22499e-05	0.434525
52	0.799451	0.249327	3080.34	999734608	51730	0.000265392	5.17411e-05	0.000252179	4.86099e-05	0.000255498	4.94448e-05	0.000257766	4.99859e-05	0.000259491	5.03752e-05	0.434397
53	0.79939	0.249182	2742.3	999671956	62652	0.000328044	6.26686e-05	0.000310789	5.86103e-05	0.000315215	5.97174e-05	0.000318194	6.04279e-05	0.000320417	6.09263e-05	0.44179
54	0.79932	0.24901	2427.91	999596884	75072	0.000403116	7.50966e-05	0.000380676	6.98868e-05	0.000386551	7.13364e-05	0.000390458	7.22636e-05	0.000393314	7.28972e-05	0.445569
55	0.799238	0.248808	2155.32	999507342	89542	0.000492658	8.95781e-05	0.000463591	8.29145e-05	0.000471351	8.47999e-05	0.000476465	8.60069e-05	0.000480128	8.68137e-05	0.448198
56	0.799143	0.248568	1879.81	999399716	107626	0.000600284	0.000107679	0.000562676	9.90853e-05	0.0005729	0.000101549	0.000579599	0.000103135	0.000584305	0.000104177	0.45507
57	0.799032	0.248286	1675.44	999270911	128805	0.000729089	0.000128882	0.000680518	0.000117842	0.000693936	0.000121036	0.000702714	0.000123115	0.000708767	0.000124462	0.460693
58	0.798904	0.247955	1497.36	999117481	153430	0.000882519	0.000153542	0.000819939	0.00013942	0.000837468	0.000143532	0.000848958	0.000146243	0.000856751	0.000147983	0.464746
59	0.798756	0.247567	1328.72	998935519	181962	0.00106448	0.000182123	0.000984077	0.000164138	0.00100686	0.000169394	0.00102187	0.000172908	0.00103191	0.000175155	0.467244
60	0.798586	0.247112	1167.38	998718491	217028	0.00128151	0.000217259	0.00117831	0.000194238	0.00120783	0.000200965	0.0012274	0.000205534	0.00124037	0.00020846	0.472831
61	0.79839	0.246583	1036.56	998461647	256844	0.00153835	0.000257174	0.00140626	0.00022795	0.00144429	0.000236462	0.00146974	0.000242341	0.00148649	0.000246126	0.475123
62	0.798163	0.245961	908.223	998154667	306980	0.00184533	0.000307453	0.00167627	0.000270009	0.00172514	0.000280853	0.00175821	0.000288465	0.00177991	0.000293419	0.48247
63	0.797902	0.245235	803.604	997790343	364324	0.00220966	0.000364998	0.00199364	0.000317366	0.0020562	0.000331058	0.00209903	0.000340821	0.00212717	0.000347259	0.486763
64	0.797602	0.24439	713.316	997358835	431508	0.00264117	0.000432464	0.00236566	0.00037202	0.00244544	0.00038924	0.00250073	0.000401704	0.00253721	0.000410036	0.49035
65	0.797256	0.243402	628.552	996844392	514443	0.00315561	0.000515805	0.00280429	0.000438632	0.00290586	0.000460421	0.0029771	0.000476367	0.0030244	0.000487198	0.497438
66	0.796857	0.242253	560.309	996235663	608729	0.00376434	0.000610656	0.00331719	0.000512897	0.00344611	0.00054025	0.00353752	0.000560423	0.00359876	0.000574357	0.501067
67	0.796401	0.240921	492.726	995514905	720758	0.00448509	0.000723481	0.00391676	0.000599573	0.00408006	0.000633954	0.00419693	0.000659414	0.00427605	0.000677285	0.505247
68	0.795877	0.239376	433.025	994661119	853786	0.00533888	0.000857633	0.00461726	0.000700493	0.00482381	0.000743742	0.00497276	0.000775827	0.00507475	0.000798708	0.509888
69	0.795274	0.237584	380.686	993648325	1012794	0.00635168	0.00101823	0.00543586	0.000818601	0.00569698	0.00087317	0.00588635	0.000913586	0.00601759	0.00094284	0.515498
70	0.794583	0.235513	333.806	992449559	1198766	0.00755044	0.00120643	0.00638913	0.000953271	0.00671909	0.00102211	0.00695923	0.00107288	0.00712763	0.00111004	0.520228
71	0.793789	0.233119	291.987	991027737	1421822	0.00897226	0.00143264	0.00749989	0.00111076	0.00791707	0.00119798	0.0082211	0.00126187	0.00843663	0.00130899	0.526308
72	0.792878	0.230362	256.023	989346410	1681327	0.0106536	0.00169655	0.00878808	0.00128819	0.00931571	0.00139864	0.00969994	0.00147884	0.00997486	0.00153823	0.531105
73	0.791834	0.227196	222.063	987358037	1988373	0.012642	0.00200978	0.0102793	0.00149123	0.0109471	0.00163137	0.011432	0.00173209	0.0117817	0.00180681	0.536258
74	0.790633	0.223564	193.912	985006275	2351762	0.0149937	0.00238187	0.0120022	0.00172291	0.0128479	0.00190084	0.0134596	0.00202755	0.0139031	0.0021214	0.541824
75	0.789252	0.219409	168.222	982224355	2781920	0.0177756	0.00282427	0.0139887	0.00198647	0.0150601	0.00221221	0.0158315	0.00237196	0.0163929	0.00248979	0.547862
76	0.787666	0.214682	145.125	978940875	3283480	0.0210591	0.0033429	0.0162685	0.00227985	0.0176253	0.00256514	0.0185981	0.00276656	0.019307	0.0029141	0.55314
77	0.785841	0.209315	124.972	975063300	3877575	0.0249367	0.00396099	0.0188793	0.00261071	0.0205962	0.0029709	0.0218237	0.00322562	0.0227175	0.00341058	0.559235
78	0.783742	0.203256	106.823	970491713	4571587	0.0295083	0.0046885	0.0218543	0.00297507	0.0240247	0.00342858	0.0255745	0.00375078	0.0266999	0.00398236	0.565004
79	0.781325	0.196453	90.7746	965107320	5384393	0.0348927	0.00554811	0.0252291	0.00337472	0.0279694	0.00394463	0.0299265	0.00435199	0.031342	0.0046421	0.570895
80	0.778537	0.188859	76.7926	958773886	6333434	0.0412261	0.00656241	0.0290369	0.00380785	0.0324919	0.00452248	0.0349629	0.00503641	0.0367421	0.00540011	0.576846
81	0.775319	0.180437	64.3265	951331190	7442696	0.0486688	0.00776272	0.0333103	0.00427341	0.0376596	0.00516776	0.0407773	0.00581442	0.0430131	0.00627099	0.583194
82	0.771597	0.171176	53.4833	942605069	8726121	0.0573949	0.00917254	0.0380704	0.00476006	0.0435348	0.00587517	0.0474631	0.00668574	0.0502721	0.00725895	0.589308
83	0.767284	0.161074	43.9508	932382427	10222642	0.0676176	0.0108451	0.0433368	0.00526645	0.0501874	0.00665264	0.0551298	0.00766673	0.0586593	0.00838722	0.59625
84	0.762278	0.150168	35.6447	920431308	11951119	0.0795687	0.0128178	0.0491136	0.00577681	0.0576779	0.00749048	0.0638852	0.00875545	0.0683189	0.00965961	0.603512
85	0.75647	0.138554	28.485	906519864	13911444	0.0934801	0.015114	0.055378	0.00626439	0.0660419	0.00836398	0.0738189	0.00993368	0.0793814	0.0110625	0.609977
86	0.74973	0.126339	22.286	890346524	16173340	0.109653	0.0178411	0.0621092	0.00673118	0.0753282	0.00928633	0.0850487	0.0112298	0.0920164	0.012635	0.617818
87	0.741902	0.113683	17.1051	871600919	18745605	0.128399	0.0210543	0.0692557	0.00714648	0.0855538	0.0102256	0.0976698	0.0126211	0.106379	0.0143624	0.626321
88	0.732843	0.100796	12.7728	849944203	21656716	0.150056	0.0248471	0.0767418	0.00748608	0.0967108	0.011157	0.111763	0.0140936	0.122621	0.016242	0.63583
89	0.722434	0.0879421	9.25435	825041421	24902782	0.174959	0.0292993	0.0844565	0.00771476	0.108748	0.0120373	0.127372	0.0156081	0.140865	0.0182439	0.64597
90	0.710636	0.0754063	6.45904	796530913	28510508	0.203469	0.0345565	0.0922685	0.00781202	0.121587	0.0128384	0.144513	0.0171414	0.161223	0.0203584	0.657583
91	0.697493	0.0634653	4.34612	764041001	32489912	0.235959	0.0407893	0.100027	0.0077581	0.135109	0.013522	0.163168	0.0186549	0.183782	0.022559	0.67131
92	0.683221	0.052391	2.8208	727284861	36756140	0.272715	0.0481075	0.10755	0.0075238	0.149121	0.0140127	0.183218	0.0200503	0.208529	0.0247474	0.68637
93	0.667924	0.0423817	1.79474	686120409	41164452	0.31388	0.0566002	0.114644	0.00709346	0.163351	0.0142293	0.204425	0.0212069	0.235318	0.0267888	0.701903
94	0.65146	0.0335556	1.13626	640633617	45486792	0.359366	0.0662956	0.121113	0.00646868	0.177442	0.0140916	0.226412	0.021987	0.263828	0.0285093	0.716721
95	0.633766	0.0259731	0.713226	591099739	49533878	0.4089	0.0773201	0.126802	0.00568971	0.191015	0.0135725	0.248717	0.0223054	0.293609	0.0297813	0.731159
96	0.614843	0.0196394	0.442447	538053812	53045927	0.461946	0.0897411	0.13161	0.00480808	0.203681	0.0126666	0.270795	0.0220772	0.324066	0.0304576	0.745034
97	0.594719	0.0144981	0.271069	482285348	55768464	0.517715	0.103648	0.135505	0.00389487	0.215097	0.0114155	0.292055	0.0212609	0.354488	0.0304214	0.758568
98	0.573482	0.0104473	0.163913	424881223	57404125	0.575119	0.119025	0.138521	0.00301601	0.224989	0.00989188	0.311898	0.0198429	0.384061	0.0295732	0.771381
99	0.551267	0.0073514	0.097873	367199535	57681688	0.6328	0.13576	0.140747	0.00222622	0.233192	0.00820291	0.329768	0.0178695	0.411943	0.0278816	0.782923
100	0.528198	0.00505212	0.0577148	310653135	56546400	0.689347	0.153994	0.142315	0.00156718	0.239687	0.0064952	0.345262	0.015494	0.437406	0.0254631	0.794421
101	0.504401	0.00339126	0.0336169	256669821	53983314	0.74333	0.173774	0.143366	0.00105106	0.24458	0.00489305	0.358152	0.0128904	0.459873	0.0224673	0.806415
102	0.480155	0.00222723	0.0193345	206735329	49934492	0.793265	0.194548	0.144033	0.000667374	0.248067	0.00348742	0.368374	0.0102213	0.47891	0.0190368	0.816928
103	0.455676	0.00143316	0.0109998	162012622	44722707	0.837987	0.216328	0.144433	0.000399821	0.250417	0.00234973	0.37608	0.00770662	0.494369	0.0154593	0.827015
104	0.431157	0.00090473	0.00619966	123290211	38722411	0.87671	0.239009	0.144658	0.000225171	0.251911	0.00149449	0.381587	0.00550671	0.506365	0.011996	0.837121
105	0.406897	0.000561647	0.00346379	90979985	32310226	0.90902	0.262066	0.144777	0.000118579	0.252807	0.000895478	0.385298	0.00371131	0.515218	0.00885316	0.846321
106	0.383142	0.000343862	0.0019235	65052863	25927122	0.934947	0.284976	0.144835	5.80768e-05	0.253312	0.000504801	0.387648	0.00235003	0.521409	0.00619101	0.854007
107	0.360113	0.000208188	0.00106371	45039384	20013479	0.954961	0.307649	0.144861	2.63177e-05	0.253579	0.00026748	0.389046	0.00139774	0.525506	0.00409666	0.860972
108	0.337808	0.000124796	0.000587209	30156374	14883010	0.969844	0.330444	0.144872	1.10878e-05	0.253712	0.000133054	0.389828	0.000781953	0.528071	0.00256464	0.868958
109	0.316626	7.4386e-05	0.00032349	19541186	10615188	0.980459	0.352005	0.144876	4.24608e-06	0.253774	6.17273e-05	0.390238	0.000409693	0.52958	0.00150959	0.875004
110	0.296505	4.4131e-05	0.000178777	12248325	7292861	0.987752	0.373205	0.144878	1.49504e-06	0.253801	2.67648e-05	0.39044	0.000202122	0.530418	0.000837694	0.881948
111	0.277518	2.61394e-05	9.90297e-05	7432400	4815925	0.992568	0.39319	0.144878	4.81593e-07	0.253812	1.07877e-05	0.390533	9.37661e-05	0.530854	0.000436515	0.888108
112	0.259791	1.55164e-05	5.51691e-05	4376565	3055835	0.995623	0.411151	0.144879	1.37513e-07	0.253816	4.01842e-06	0.390574	4.08412e-05	0.531068	0.00021342	0.892083
113	0.243145	9.23521e-06	3.09922e-05	2500912	1875653	0.997499	0.428567	0.144879	3.75131e-08	0.253817	1.39736e-06	0.390591	1.67683e-05	0.531166	9.85468e-05	0.897376
114	0.227853	5.54646e-06	1.75748e-05	1395289	1105623	0.998605	0.442088	0.144879	5.52812e-09	0.253817	4.42249e-07	0.390598	6.4292e-06	0.531209	4.26715e-05	0.897126
115	0.212804	3.32285e-06	1.00874e-05	751541	643748	0.999248	0.461373	0.144879	0	0.253818	1.31968e-07	0.3906	2.36256e-06	0.531227	1.78415e-05	0.910864
116	0.199491	2.00904e-06	5.78825e-06	394179	357362	0.999606	0.475506	0.144879	0	0.253818	3.57362e-08	0.390601	8.00491e-07	0.531234	6.95784e-06	0.916466
117	0.187019	1.22219e-06	3.36847e-06	200937	193242	0.999799	0.490239	0.144879	0	0.253818	8.69589e-09	0.390601	2.54113e-07	0.531236	2.58268e-06	0.925274
118	0.175176	7.47115e-07	1.98436e-06	99694	101243	0.9999	0.503854	0.144879	0	0.253818	2.02486e-09	0.390601	7.5426e-08	0.531237	9.05112e-07	0.933817
119	0.164316	4.58124e-07	1.17115e-06	47746	51948	0.999952	0.521074	0.144879	0	0.253818	2.5974e-10	0.390601	2.07792e-08	0.531238	3.02078e-07	0.950617
120	0.155511	2.9356e-07	7.02959e-07	23411	24335	0.999977	0.509676	0.144879	0	0.253818	0	0.390601	4.98867e-09	0.531238	8.93095e-08	0.917226
