# Supplementary material for: Quantifying the Potential for Future Gene Therapy to Lower Lifetime Risk of Polygenic Late-Onset Diseases
Source: MDPI journal article supplement (doi:10.3390/ijms20133352), 2019-07-08
Supplement: s2 [file s2 › SuppFiles/Results/LODsRareMedium/Alzheimers/0.250/IndividualsByBetaDistrib.csv]

nEntry	Beta	nDetrimentalCount	nFractionPopulation	nCumulativeFractionPopulation	nEditsNeeded	nIndividuals
0	-19.8	0	0	1	0	0
1	-19.6	0	0	1	0	0
2	-19.4	0	0	1	0	0
3	-19.2	0	0	1	0	0
4	-19	0	0	1	0	0
5	-18.8	17	1e-09	1	0	1
6	-18.6	0	0	1	0	0
7	-18.4	0	0	1	0	0
8	-18.2	20	2e-09	1	0	2
9	-18	21	2e-09	1	0	2
10	-17.8	19.6	5e-09	1	0	5
11	-17.6	20.5	2e-09	0.99999999	0	2
12	-17.4	21.667	9e-09	0.99999999	0	9
13	-17.2	22	2e-09	0.99999998	0	2
14	-17	21.421	1.9e-08	0.99999998	0	19
15	-16.8	22.808	2.6e-08	0.99999996	0	26
16	-16.6	22.297	3.7e-08	0.99999993	0	37
17	-16.4	23.067	6e-08	0.99999989	0	60
18	-16.2	23.681	7.2e-08	0.99999984	0	72
19	-16	23.946	1.29e-07	0.99999976	0	129
20	-15.8	24.342	1.9e-07	0.99999963	0	190
21	-15.6	24.753	2.51e-07	0.99999944	0	251
22	-15.4	25.075	3.34e-07	0.99999919	0	334
23	-15.2	25.562	4.84e-07	0.99999886	0	484
24	-15	25.729	7.22e-07	0.99999837	0	722
25	-14.8	26.329	9.68e-07	0.99999765	0	968
26	-14.6	26.714	1.307e-06	0.99999669	0	1307
27	-14.4	27.19	1.761e-06	0.99999538	0	1761
28	-14.2	27.481	2.461e-06	0.99999362	0	2461
29	-14	27.907	3.256e-06	0.99999116	0	3256
30	-13.8	28.322	4.349e-06	0.9999879	0	4349
31	-13.6	28.693	5.888e-06	0.99998355	0	5888
32	-13.4	29.061	7.822e-06	0.99997766	0	7822
33	-13.2	29.488	1.0281e-05	0.99996984	0	10281
34	-13	29.847	1.3685e-05	0.99995956	0	13685
35	-12.8	30.235	1.7251e-05	0.99994587	0	17251
36	-12.6	30.635	2.2381e-05	0.99992862	0	22381
37	-12.4	31.023	2.9141e-05	0.99990624	0	29141
38	-12.2	31.411	3.6707e-05	0.9998771	0	36707
39	-12	31.811	4.6461e-05	0.99984039	0	46461
40	-11.8	32.189	5.888e-05	0.99979393	0	58880
41	-11.6	32.579	7.3643e-05	0.99973505	0	73643
42	-11.4	32.975	9.2479e-05	0.99966141	0	92479
43	-11.2	33.361	0.000114135	0.99956893	0	114135
44	-11	33.748	0.000141851	0.9994548	0	141851
45	-10.8	34.125	0.000172469	0.99931295	0	172469
46	-10.6	34.515	0.000210685	0.99914048	0	210685
47	-10.4	34.907	0.000256747	0.99892979	0	256747
48	-10.2	35.285	0.000310636	0.99867304	0	310636
49	-10	35.673	0.000373521	0.99836241	0	373521
50	-9.8	36.054	0.000447451	0.99798889	0	447451
51	-9.6	36.446	0.000534707	0.99754144	0	534707
52	-9.4	36.826	0.000633051	0.99700673	0	633051
53	-9.2	37.212	0.00075004	0.99637368	0	750040
54	-9	37.595	0.000877614	0.99562364	0	877614
55	-8.8	37.98	0.001029872	0.99474602	0	1029872
56	-8.6	38.359	0.001200003	0.99371615	0	1200003
57	-8.4	38.749	0.001389919	0.99251615	0	1389919
58	-8.2	39.126	0.001605193	0.99112623	0	1605193
59	-8	39.512	0.001849475	0.98952104	0	1849475
60	-7.8	39.891	0.002110483	0.98767156	0	2110483
61	-7.6	40.272	0.002415407	0.98556108	0	2415407
62	-7.4	40.65	0.002733819	0.98314567	0	2733819
63	-7.2	41.034	0.003096724	0.98041185	0	3096724
64	-7	41.413	0.003476829	0.97731513	0	3476829
65	-6.8	41.793	0.003909838	0.9738383	0	3909838
66	-6.6	42.172	0.004358714	0.96992846	0	4358714
67	-6.4	42.551	0.004851297	0.96556975	0	4851297
68	-6.2	42.932	0.005368263	0.96071845	0	5368263
69	-6	43.311	0.005943749	0.95535019	0	5943749
70	-5.8	43.688	0.00651342	0.94940644	0	6513420
71	-5.6	44.065	0.007142786	0.94289302	0	7142786
72	-5.4	44.446	0.007798742	0.93575023	0	7798742
73	-5.2	44.821	0.008481917	0.92795149	0	8481917
74	-5	45.199	0.009172888	0.91946958	0	9172888
75	-4.8	45.576	0.009899278	0.91029669	0	9899278
76	-4.6	45.956	0.010635486	0.90039741	0	10635486
77	-4.4	46.328	0.01141231	0.88976192	0	11412310
78	-4.2	46.707	0.012147328	0.87834961	0	12147328
79	-4	47.081	0.012934647	0.86620228	0	12934647
80	-3.8	47.461	0.013705003	0.85326764	0	13705003
81	-3.6	47.832	0.014478105	0.83956263	0	14478105
82	-3.4	48.211	0.015235147	0.82508453	0	15235147
83	-3.2	48.583	0.015979793	0.80984938	0	15979793
84	-3	48.961	0.016692754	0.79386959	0	16692754
85	-2.8	49.331	0.017396827	0.77717684	0	17396827
86	-2.6	49.709	0.01806751	0.75978001	0	18067510
87	-2.4	50.081	0.018693866	0.7417125	0	18693866
88	-2.2	50.458	0.019263042	0.72301863	0	19263042
89	-2	50.829	0.019806633	0.70375559	0	19806633
90	-1.8	51.205	0.020284718	0.68394896	0	20284718
91	-1.6	51.575	0.020723755	0.66366424	0	20723755
92	-1.4	51.951	0.02109676	0.64294049	0	21096760
93	-1.2	52.324	0.021400837	0.62184372	0	21400837
94	-1	52.698	0.02169295	0.60044289	0	21692950
95	-0.8	53.067	0.021849156	0.57874994	0	21849156
96	-0.6	53.443	0.021957608	0.55690078	0	21957608
97	-0.4	53.812	0.021997153	0.53494317	0	21997153
98	-0.2	54.187	0.02201768	0.51294602	0	22017680
99	0	54.555	0.021911745	0.49092834	0	21911745
100	0.2	54.931	0.021775933	0.4690166	0.37633	21775933
101	0.4	55.3	0.02156153	0.44724066	0.74569	21561530
102	0.6	55.672	0.021302822	0.42567913	1.1173	21302822
103	0.8	56.041	0.020960149	0.40437631	1.4862	20960149
104	1	56.415	0.020569899	0.38341616	1.8598	20569899
105	1.2	56.784	0.020130047	0.36284626	2.2294	20130047
106	1.4	57.155	0.019676934	0.34271622	2.5999	19676934
107	1.6	57.524	0.019127295	0.32303928	2.9692	19127295
108	1.8	57.897	0.018562683	0.30391199	3.3419	18562683
109	2	58.264	0.01795567	0.2853493	3.7094	17955670
110	2.2	58.635	0.017345507	0.26739363	4.0805	17345507
111	2.4	59.004	0.016662505	0.25004813	4.4494	16662505
112	2.6	59.374	0.016020614	0.23338562	4.8192	16020614
113	2.8	59.744	0.01531981	0.21736501	5.1891	15319810
114	3	60.113	0.014627655	0.2020452	5.5578	14627655
115	3.2	60.484	0.013923487	0.18741754	5.9292	13923487
116	3.4	60.851	0.013227474	0.17349406	6.2963	13227474
117	3.6	61.219	0.012509481	0.16026658	6.664	12509481
118	3.8	61.586	0.011811154	0.1477571	7.0314	11811154
119	4	61.958	0.011134157	0.13594595	7.4033	11134157
120	4.2	62.322	0.010463009	0.12481179	7.7676	10463009
121	4.4	62.693	0.009791805	0.11434878	8.1384	9791805
122	4.6	63.06	0.009153742	0.10455698	8.5054	9153742
123	4.8	63.43	0.008525276	0.095403234	8.8755	8525276
124	5	63.792	0.007934918	0.086877958	9.2376	7934918
125	5.2	64.163	0.007356508	0.07894304	9.6082	7356508
126	5.4	64.53	0.00680567	0.071586532	9.9748	6805670
127	5.6	64.899	0.006282185	0.064780862	10.344	6282185
128	5.8	65.263	0.00578412	0.058498677	10.708	5784120
129	6	65.635	0.005303223	0.052714557	11.08	5303223
130	6.2	65.998	0.004864049	0.047411334	11.443	4864049
131	6.4	66.367	0.004443947	0.042547285	11.812	4443947
132	6.6	66.728	0.00404603	0.038103338	12.174	4046030
133	6.8	67.099	0.003677836	0.034057308	12.544	3677836
134	7	67.461	0.003337264	0.030379472	12.906	3337264
135	7.2	67.834	0.003023263	0.027042208	13.279	3023263
136	7.4	68.193	0.00272442	0.024018945	13.638	2724420
137	7.6	68.564	0.002456007	0.021294525	14.009	2456007
138	7.8	68.926	0.002206928	0.018838518	14.371	2206928
139	8	69.298	0.001981921	0.01663159	14.743	1981921
140	8.2	69.662	0.00176692	0.014649669	15.107	1766920
141	8.4	70.026	0.001578179	0.012882749	15.472	1578179
142	8.6	70.39	0.001403583	0.01130457	15.835	1403583
143	8.8	70.758	0.001247872	0.009900987	16.203	1247872
144	9	71.122	0.001103135	0.008653115	16.567	1103135
145	9.2	71.484	0.000980308	0.00754998	16.93	980308
146	9.4	71.847	0.000863151	0.006569672	17.292	863151
147	9.6	72.212	0.000760581	0.005706521	17.657	760581
148	9.8	72.581	0.000666724	0.00494594	18.026	666724
149	10	72.944	0.00058447	0.004279216	18.389	584470
150	10.2	73.304	0.00051078	0.003694746	18.749	510780
151	10.4	73.665	0.000445392	0.003183966	19.11	445392
152	10.6	74.046	0.000387758	0.002738574	19.491	387758
153	10.8	74.401	0.000336858	0.002350816	19.846	336858
154	11	74.764	0.000292093	0.002013958	20.209	292093
155	11.2	75.124	0.000252128	0.001721865	20.57	252128
156	11.4	75.501	0.000217769	0.001469737	20.947	217769
157	11.6	75.852	0.000187827	0.001251968	21.297	187827
158	11.8	76.219	0.000161582	0.001064141	21.665	161582
159	12	76.583	0.000138586	0.000902559	22.028	138586
160	12.2	76.943	0.000118162	0.000763973	22.389	118162
161	12.4	77.33	0.000101165	0.000645811	22.776	101165
162	12.6	77.666	8.6236e-05	0.000544646	23.111	86236
163	12.8	78.027	7.3688e-05	0.00045841	23.472	73688
164	13	78.405	6.2147e-05	0.000384722	23.851	62147
165	13.2	78.776	5.2494e-05	0.000322575	24.221	52494
166	13.4	79.118	4.4949e-05	0.000270081	24.564	44949
167	13.6	79.475	3.7352e-05	0.000225132	24.92	37352
168	13.8	79.844	3.1614e-05	0.00018778	25.289	31614
169	14	80.192	2.6536e-05	0.000156166	25.637	26536
170	14.2	80.573	2.2312e-05	0.00012963	26.018	22312
171	14.4	80.912	1.8502e-05	0.000107318	26.357	18502
172	14.6	81.271	1.5309e-05	8.8816e-05	26.717	15309
173	14.8	81.671	1.301e-05	7.3507e-05	27.117	13010
174	15	81.994	1.0764e-05	6.0497e-05	27.44	10764
175	15.2	82.375	8.921e-06	4.9733e-05	27.82	8921
176	15.4	82.758	7.269e-06	4.0812e-05	28.203	7269
177	15.6	83.092	6.027e-06	3.3543e-05	28.537	6027
178	15.8	83.406	5e-06	2.7516e-05	28.851	5000
179	16	83.828	4.149e-06	2.2516e-05	29.273	4149
180	16.2	84.153	3.408e-06	1.8367e-05	29.599	3408
181	16.4	84.518	2.721e-06	1.4959e-05	29.963	2721
182	16.6	84.97	2.279e-06	1.2238e-05	30.415	2279
183	16.8	85.311	1.816e-06	9.959e-06	30.756	1816
184	17	85.688	1.585e-06	8.143e-06	31.134	1585
185	17.2	86.062	1.233e-06	6.558e-06	31.507	1233
186	17.4	86.292	1.079e-06	5.325e-06	31.737	1079
187	17.6	86.662	8.5e-07	4.246e-06	32.108	850
188	17.8	87.177	6.99e-07	3.396e-06	32.623	699
189	18	87.327	5.38e-07	2.697e-06	32.772	538
190	18.2	87.979	4.38e-07	2.159e-06	33.425	438
191	18.4	88.262	3.24e-07	1.721e-06	33.708	324
192	18.6	88.526	2.93e-07	1.397e-06	33.971	293
193	18.8	88.874	2.38e-07	1.104e-06	34.319	238
194	19	89.272	1.58e-07	8.66e-07	34.717	158
195	19.2	89.507	1.42e-07	7.08e-07	34.952	142
196	19.4	90.214	1.12e-07	5.66e-07	35.66	112
197	19.6	90.375	9.6e-08	4.54e-07	35.82	96
198	19.8	90.625	7.2e-08	3.58e-07	36.07	72
199	20	92.49	2.86e-07	2.86e-07	37.935	286
