# Supplementary material for: Quantifying the Potential for Future Gene Therapy to Lower Lifetime Risk of Polygenic Late-Onset Diseases
Source: MDPI journal article supplement (doi:10.3390/ijms20133352), 2019-07-08
Supplement: s2 [file s2 › SuppFiles/Results/LODsRareMedium/Alzheimers/1.000/FrailtyAnalysis.csv]

Age	Heritability	MeanOR	CaseOR	nControls	nCases	nCumIncidence	nIncidence	nLifeIncidence0	nAbsIncidence0	nLifeIncidence5	nAbsIncidence5	nLifeIncidence10	nAbsIncidence10	nLifeIncidence15	nAbsIncidence15	nIncActDivExp
38	0.799737	0.999781	78129.9	999997866	2134	2.134e-06	2.134e-06	2.07522e-06	2.07522e-06	2.08843e-06	2.08843e-06	2.09942e-06	2.09942e-06	2.109e-06	2.109e-06	1.03608
39	0.799731	0.999734	43855.4	999993431	4435	6.569e-06	4.43501e-06	6.38174e-06	4.30653e-06	6.42369e-06	4.33527e-06	6.45827e-06	4.35886e-06	6.48832e-06	4.37933e-06	0.990707
40	0.799722	0.999658	33893.9	999986144	7287	1.3856e-05	7.28705e-06	1.34467e-05	7.06501e-06	1.35382e-05	7.11453e-06	1.36129e-05	7.15468e-06	1.36774e-05	7.18915e-06	0.99641
41	0.79971	0.999551	25678.1	999975574	10570	2.4426e-05	1.05701e-05	2.3678e-05	1.02314e-05	2.38449e-05	1.03069e-05	2.398e-05	1.03673e-05	2.40959e-05	1.04186e-05	0.993186
42	0.799693	0.999406	20496.3	999960982	14592	3.9018e-05	1.45924e-05	3.7778e-05	1.41004e-05	3.80548e-05	1.42102e-05	3.82764e-05	1.42967e-05	3.84653e-05	1.43698e-05	1.00289
43	0.799673	0.999219	17575	999941880	19102	5.812e-05	1.91027e-05	5.62019e-05	1.84246e-05	5.66306e-05	1.85766e-05	5.69705e-05	1.86948e-05	5.72577e-05	1.87932e-05	0.998238
44	0.799648	0.998986	14406.2	999917514	24366	8.2486e-05	2.43674e-05	7.96564e-05	2.34558e-05	8.02907e-05	2.36615e-05	8.07885e-05	2.38194e-05	8.12054e-05	2.3949e-05	0.993811
45	0.799617	0.998695	12140.1	999886530	30984	0.00011347	3.09866e-05	0.000109417	2.97632e-05	0.000110331	3.00424e-05	0.000111039	3.02529e-05	0.000111627	3.04237e-05	1.00486
46	0.799581	0.998342	10780.9	999848482	38048	0.000151518	3.80523e-05	0.000145877	3.64644e-05	0.000147159	3.68329e-05	0.000148139	3.71046e-05	0.000148944	3.73219e-05	0.994799
47	0.799537	0.99791	9149.69	999801093	47389	0.000198907	4.73962e-05	0.000191173	4.53025e-05	0.000192951	4.57982e-05	0.000194287	4.61549e-05	0.000195373	4.64359e-05	1.00943
48	0.799486	0.997398	7961.54	999743905	57188	0.000256095	5.71994e-05	0.000245682	5.45202e-05	0.000248108	5.51688e-05	0.0002499	5.56238e-05	0.00025134	5.59779e-05	1.00057
49	0.799426	0.996787	6943.89	999674691	69214	0.000325309	6.92317e-05	0.000311452	6.57868e-05	0.000314733	6.66418e-05	0.000317109	6.72261e-05	0.000318997	6.76747e-05	1.00113
50	0.799356	0.996062	6133.67	999591342	83349	0.000408658	8.33761e-05	0.000390387	7.89605e-05	0.000394792	8.00844e-05	0.000397918	8.08357e-05	0.000400373	8.14022e-05	1.00185
51	0.799276	0.995207	5394.95	999491527	99815	0.000508473	9.98558e-05	0.000484566	9.42174e-05	0.000490441	9.56888e-05	0.000494535	9.66559e-05	0.000497702	9.73689e-05	1.00123
52	0.799183	0.994206	4735.41	999372691	118836	0.000627309	0.000118896	0.000596234	0.000111725	0.000604028	0.000113644	0.000609364	0.000114888	0.000613426	0.000115783	0.998206
53	0.799075	0.993026	4220.28	999230719	141972	0.000769281	0.000142061	0.000729048	0.000132897	0.00073935	0.000135407	0.000746296	0.000137018	0.000751487	0.000138148	1.00148
54	0.798951	0.991652	3739.79	999062669	168050	0.000937331	0.000168179	0.000885491	0.000156563	0.000899038	0.000159811	0.000908059	0.000161888	0.000914669	0.000163307	0.997855
55	0.798808	0.99004	3295.64	998862243	200426	0.00113776	0.000200614	0.00107108	0.000185766	0.00108885	0.00018999	0.00110057	0.000192694	0.00110899	0.000194501	1.00376
56	0.798645	0.988166	2901.19	998625254	236989	0.00137475	0.000237259	0.00128926	0.000218431	0.00131246	0.000223862	0.00132767	0.000227358	0.00133838	0.000229656	1.0027
57	0.798459	0.986	2578.71	998346788	278466	0.00165321	0.000278849	0.00154403	0.000255116	0.00157413	0.000262031	0.00159384	0.000266531	0.00160746	0.000269448	0.996754
58	0.798247	0.98348	2265.47	998016796	329992	0.0019832	0.000330538	0.00184389	0.000300357	0.00188283	0.000309215	0.00190837	0.000315056	0.00192574	0.000318804	1.00048
59	0.798004	0.980553	2002.42	997626542	390254	0.00237346	0.000391029	0.00219592	0.000352726	0.00224613	0.000364021	0.00227921	0.000371572	0.00230139	0.000376401	1.0032
60	0.797727	0.977175	1779.17	997167912	458630	0.00283209	0.000459721	0.00260639	0.000411446	0.00267081	0.000425695	0.00271355	0.000435374	0.00274192	0.000441571	1.00051
61	0.797413	0.97328	1566.06	996628455	539457	0.00337155	0.000540989	0.00308516	0.000480131	0.00316746	0.000498059	0.00322254	0.000510442	0.00325886	0.000518414	0.999467
62	0.797054	0.968768	1395.47	995991801	636654	0.0040082	0.000638808	0.00364514	0.000561873	0.00374993	0.000584439	0.0038208	0.000600278	0.00386739	0.000610588	1.00245
63	0.796647	0.963587	1228.51	995244885	746916	0.00475511	0.000749922	0.00429578	0.000653264	0.00442865	0.000681446	0.00451953	0.000701544	0.00457932	0.000714795	1.0001
64	0.796186	0.957634	1080.73	994367336	877549	0.00563266	0.000881742	0.00505235	0.000760185	0.00522024	0.000795371	0.00533647	0.00082084	0.0054132	0.000837866	0.999765
65	0.795662	0.950794	956.906	993336397	1030939	0.0066636	0.00103678	0.00593137	0.000883994	0.00614292	0.000927907	0.0062911	0.000960042	0.00638954	0.000981871	0.999861
66	0.795066	0.942946	843.761	992125054	1211343	0.00787495	0.00121947	0.00695201	0.00102749	0.00721799	0.00108228	0.00740632	0.0011227	0.00753249	0.00115061	1.00062
67	0.794391	0.933966	743.431	990703744	1421310	0.00929626	0.00143259	0.00813435	0.00119172	0.00846812	0.00126006	0.00870666	0.00131066	0.00886807	0.00134618	1.00046
68	0.793624	0.923702	654.825	989035914	1667830	0.0109641	0.00168348	0.00950273	0.00138122	0.00992099	0.0014665	0.0102222	0.00152976	0.0104283	0.00157488	1.00088
69	0.792754	0.912004	575.766	987080933	1954981	0.0129191	0.00197665	0.0110829	0.00159765	0.0116065	0.00170415	0.0119857	0.00178303	0.0122483	0.00184013	1.00072
70	0.791767	0.898703	505.389	984790704	2290229	0.0152093	0.0023202	0.0129041	0.00184505	0.0135592	0.00197829	0.0140354	0.00207656	0.014369	0.00214847	1.0005
71	0.790646	0.883614	442.694	982108314	2682390	0.0178917	0.00272382	0.0149996	0.00212791	0.0158193	0.00229501	0.016416	0.0024174	0.0168385	0.00250767	1.00065
72	0.789374	0.866548	387.261	978969623	3138691	0.0210304	0.00319587	0.0174044	0.0024486	0.0184303	0.00265853	0.0191767	0.00281098	0.0197101	0.00292387	1.00047
73	0.787929	0.847319	337.416	975300216	3669407	0.0246998	0.00374823	0.0201564	0.00281108	0.0214408	0.00307526	0.0223732	0.00326512	0.0230444	0.00340598	1.00012
74	0.786288	0.825737	293.17	971014988	4285228	0.028985	0.00439375	0.0232958	0.00321889	0.0249044	0.00355129	0.0260677	0.00378803	0.0269099	0.00396336	0.999482
75	0.784421	0.80159	253.733	966009530	5005458	0.0339905	0.00515487	0.02687	0.00368091	0.0288848	0.00409921	0.0303355	0.00439522	0.0313897	0.00461356	0.999961
76	0.782294	0.774718	218.78	960172664	5836866	0.0398273	0.00604224	0.0309227	0.00419537	0.0334447	0.00472035	0.0352535	0.00509101	0.03657	0.00536252	0.999792
77	0.779867	0.744966	187.813	953373142	6799522	0.0466269	0.00708156	0.0355008	0.00476791	0.0386543	0.00542572	0.0409097	0.0058909	0.0425506	0.00622869	0.999814
78	0.777089	0.712213	160.812	945463973	7909169	0.054536	0.00829598	0.0406478	0.00539882	0.044586	0.00622178	0.0473989	0.00680648	0.0494403	0.00722672	0.999736
79	0.773907	0.676437	136.542	936283261	9180712	0.0637167	0.00971027	0.046402	0.00608601	0.0513118	0.00711379	0.0548193	0.00784842	0.0573554	0.00837161	0.999178
80	0.770249	0.637635	115.046	925637048	10646213	0.074363	0.0113707	0.0528028	0.00683642	0.0589139	0.00811943	0.0632852	0.00904211	0.0664327	0.00969507	0.999503
81	0.766034	0.595931	96.1004	913319474	12317574	0.0866805	0.0133071	0.0598752	0.00764062	0.0674665	0.00923967	0.072908	0.0103959	0.0768112	0.0112122	0.999732
82	0.761159	0.551582	79.4842	899109509	14209965	0.10089	0.0155586	0.0676267	0.00848713	0.0770339	0.0104754	0.0837953	0.0119206	0.0886319	0.0129426	0.999593
83	0.755495	0.504931	65.0537	882756135	16353374	0.117244	0.0181884	0.0760515	0.00937022	0.0876762	0.0118366	0.09606	0.0136409	0.102049	0.0149228	0.999977
84	0.748903	0.456561	52.388	864013297	18742838	0.135987	0.0212322	0.0851113	0.010263	0.0994235	0.0133075	0.109791	0.0155548	0.117198	0.0171611	0.999691
85	0.741194	0.407138	41.5183	842608405	21404892	0.157392	0.0247738	0.09475	0.0111558	0.112293	0.0148948	0.125076	0.0176901	0.13422	0.0197004	0.999827
86	0.73217	0.357541	32.195	818286526	24321879	0.181713	0.028865	0.104873	0.0120133	0.126258	0.0165736	0.141963	0.0200421	0.15322	0.02255	0.999561
87	0.721605	0.308747	24.3428	790796013	27490513	0.209204	0.0335952	0.115353	0.0128077	0.141254	0.018326	0.160472	0.0226192	0.174283	0.0257398	0.999389
88	0.709287	0.261807	17.8475	759906701	30889312	0.240093	0.039061	0.12603	0.0135022	0.157167	0.0201233	0.180574	0.0254199	0.197449	0.0292948	0.999563
89	0.695087	0.217804	12.616	725458261	34448440	0.274542	0.0453325	0.136702	0.0140438	0.173818	0.0219124	0.202165	0.0284126	0.222686	0.0332108	0.999457
90	0.679059	0.177701	8.55644	687354537	38103724	0.312645	0.0525237	0.147143	0.0143917	0.190977	0.0236517	0.225074	0.0315788	0.249895	0.0375053	0.999486
91	0.661607	0.142253	5.5529	645620215	41734322	0.35438	0.0607173	0.157108	0.0144984	0.208346	0.0252699	0.249037	0.0348624	0.278873	0.0421585	0.999286
92	0.643472	0.11183	3.46878	600388900	45231315	0.399611	0.0700587	0.166367	0.0143407	0.22559	0.0267088	0.27371	0.0382167	0.309326	0.0471695	0.999556
93	0.624963	0.0863325	2.14001	551993171	48395729	0.448007	0.0806073	0.174707	0.0138903	0.242319	0.0278635	0.298643	0.0415269	0.340821	0.0524572	0.999617
94	0.605669	0.0653307	1.33122	500949711	51043460	0.49905	0.0924712	0.181966	0.0131503	0.258132	0.0286471	0.323316	0.0446978	0.372813	0.0579572	0.999704
95	0.585503	0.0484062	0.824294	447966557	52983154	0.552033	0.105765	0.188051	0.0121487	0.27265	0.0289803	0.347174	0.0476267	0.404668	0.0635893	1.00014
96	0.564485	0.0350966	0.506137	393995843	53970714	0.606004	0.120479	0.192943	0.0109202	0.285537	0.0287687	0.369636	0.0501423	0.435657	0.0691762	1.00022
97	0.542643	0.0248833	0.307551	340108095	53887748	0.659892	0.136772	0.196707	0.00955218	0.296567	0.0279966	0.39018	0.0521424	0.465052	0.0746086	1.00099
98	0.52009	0.0172554	0.184707	287589260	52518835	0.712411	0.154418	0.199466	0.00811313	0.305618	0.0266093	0.408334	0.0533777	0.492109	0.0795523	1.00076
99	0.496987	0.0117099	0.109611	237736591	49852669	0.762263	0.173347	0.20139	0.00669032	0.312707	0.0246516	0.423778	0.053702	0.516206	0.0837906	0.999688
100	0.473451	0.00777693	0.0643082	191678196	46058395	0.808322	0.193737	0.202667	0.00536942	0.317998	0.0222536	0.436399	0.0530849	0.536946	0.0872408	0.999449
101	0.449636	0.00505663	0.037261	150366268	41311928	0.849634	0.215528	0.203471	0.00419632	0.321742	0.0195354	0.446263	0.0514647	0.55414	0.0897004	1.00018
102	0.425815	0.00322519	0.0213361	114576793	35789475	0.885423	0.238015	0.203949	0.00318107	0.324242	0.016623	0.453589	0.0487205	0.567784	0.0907398	0.999454
103	0.402119	0.00201939	0.0120999	84614594	29962199	0.915385	0.261503	0.204217	0.00233784	0.325816	0.0137394	0.458752	0.0450622	0.578141	0.0903938	0.999716
104	0.378755	0.00124324	0.00679392	60446767	24167827	0.939553	0.285622	0.204358	0.00166089	0.326749	0.0110236	0.462189	0.0406184	0.585628	0.0884844	1.00038
105	0.355925	0.000754274	0.00378375	41716536	18730231	0.958283	0.309863	0.204427	0.0011372	0.327268	0.00858786	0.464341	0.0355924	0.59076	0.0849041	1.00068
106	0.333902	0.000452495	0.00209427	27804173	13912363	0.972196	0.333498	0.204458	0.000747035	0.327539	0.0064932	0.465602	0.0302282	0.594082	0.0796342	0.999415
107	0.312666	0.000268781	0.00115578	17875274	9928899	0.982125	0.357101	0.204471	0.000469588	0.327671	0.00477266	0.466295	0.0249399	0.596115	0.0730968	0.999365
108	0.292423	0.000158405	0.000635626	11073009	6802265	0.988927	0.38054	0.204476	0.000283503	0.327732	0.00340203	0.466653	0.0199936	0.597287	0.0655747	1.00069
109	0.273274	9.29972e-05	0.000349721	6620754	4452255	0.993379	0.402082	0.204478	0.000160833	0.327758	0.00233811	0.466824	0.0155183	0.59792	0.05718	0.999484
110	0.2551	5.4424e-05	0.000192906	3817550	2803204	0.996182	0.423396	0.204478	8.67963e-05	0.327768	0.00155387	0.466902	0.0117344	0.598242	0.0486334	1.00056
111	0.238192	3.18668e-05	0.000106619	2125648	1691902	0.997874	0.443191	0.204478	4.43191e-05	0.327772	0.000992747	0.466935	0.00862892	0.598395	0.0401708	1.00104
112	0.222498	1.86991e-05	5.9314e-05	1144020	981628	0.998856	0.461802	0.204478	2.07811e-05	0.327773	0.000607269	0.466948	0.00617198	0.598464	0.0322522	1.00198
113	0.207903	1.103e-05	3.32647e-05	596969	547051	0.999403	0.478183	0.204478	9.56366e-06	0.327774	0.000356246	0.466953	0.00427496	0.598493	0.0251237	1.00127
114	0.19498	6.58191e-06	1.88524e-05	304080	292889	0.999696	0.490627	0.204478	2.45313e-06	0.327774	0.000196251	0.466955	0.00285299	0.598504	0.0189357	0.995626
115	0.182549	3.90577e-06	1.08259e-05	148423	155657	0.999852	0.511895	0.204478	0	0.327774	0.000104938	0.466955	0.00187865	0.598508	0.0141872	1.01061
116	0.170947	2.33235e-06	6.21596e-06	70357	78066	0.99993	0.52597	0.204478	0	0.327774	5.2597e-05	0.466955	0.00117817	0.59851	0.0102406	1.01373
117	0.159238	1.41308e-06	3.60865e-06	32753	37604	0.999967	0.534474	0.204478	0	0.327774	2.40513e-05	0.466955	0.000702834	0.59851	0.00714325	1.00876
118	0.149778	8.60027e-07	2.11156e-06	14646	18107	0.999985	0.552835	0.204478	0	0.327774	1.10567e-05	0.466955	0.000411862	0.59851	0.00494234	1.02459
119	0.139549	5.20059e-07	1.24908e-06	6238	8408	0.999994	0.574082	0.204478	0	0.327774	2.87041e-06	0.466956	0.000229633	0.598511	0.00333828	1.04732
120	0.133912	3.31999e-07	7.43073e-07	2763	3475	0.999997	0.55707	0.204478	0	0.327774	0	0.466956	0.000114199	0.598511	0.00204445	1.00252
