# Supplementary material for: Quantifying the Potential for Future Gene Therapy to Lower Lifetime Risk of Polygenic Late-Onset Diseases
Source: MDPI journal article supplement (doi:10.3390/ijms20133352), 2019-07-08
Supplement: s2 [file s2 › SuppFiles/Results/LODsRareMedium/Alzheimers/1.000/IndividualsByBetaDistrib.csv]

nEntry	Beta	nDetrimentalCount	nFractionPopulation	nCumulativeFractionPopulation	nEditsNeeded	nIndividuals
0	-19.8	0	0	1	0	0
1	-19.6	0	0	1	0	0
2	-19.4	17	1e-09	1	0	1
3	-19.2	0	0	1	0	0
4	-19	0	0	1	0	0
5	-18.8	0	0	1	0	0
6	-18.6	0	0	1	0	0
7	-18.4	0	0	1	0	0
8	-18.2	19.5	2e-09	1	0	2
9	-18	0	0	1	0	0
10	-17.8	22	2e-09	1	0	2
11	-17.6	19	4e-09	1	0	4
12	-17.4	21	1e-08	0.99999999	0	10
13	-17.2	21.857	1.4e-08	0.99999998	0	14
14	-17	22.188	1.6e-08	0.99999997	0	16
15	-16.8	22.64	2.5e-08	0.99999995	0	25
16	-16.6	22.64	5e-08	0.99999993	0	50
17	-16.4	23.032	6.2e-08	0.99999988	0	62
18	-16.2	23.531	8.1e-08	0.99999981	0	81
19	-16	24.163	1.29e-07	0.99999973	0	129
20	-15.8	24.274	1.86e-07	0.9999996	0	186
21	-15.6	24.764	2.8e-07	0.99999942	0	280
22	-15.4	25.169	3.31e-07	0.99999914	0	331
23	-15.2	25.414	4.49e-07	0.99999881	0	449
24	-15	25.907	6.96e-07	0.99999836	0	696
25	-14.8	26.237	9.76e-07	0.99999766	0	976
26	-14.6	26.67	1.426e-06	0.99999669	0	1426
27	-14.4	27.092	1.799e-06	0.99999526	0	1799
28	-14.2	27.454	2.452e-06	0.99999346	0	2452
29	-14	27.874	3.434e-06	0.99999101	0	3434
30	-13.8	28.299	4.542e-06	0.99998758	0	4542
31	-13.6	28.678	5.921e-06	0.99998303	0	5921
32	-13.4	29.084	7.673e-06	0.99997711	0	7673
33	-13.2	29.454	1.027e-05	0.99996944	0	10270
34	-13	29.86	1.3312e-05	0.99995917	0	13312
35	-12.8	30.249	1.7365e-05	0.99994586	0	17365
36	-12.6	30.639	2.2469e-05	0.99992849	0	22469
37	-12.4	31.025	2.8698e-05	0.99990602	0	28698
38	-12.2	31.403	3.6508e-05	0.99987733	0	36508
39	-12	31.801	4.6763e-05	0.99984082	0	46763
40	-11.8	32.187	5.8832e-05	0.99979405	0	58832
41	-11.6	32.578	7.3814e-05	0.99973522	0	73814
42	-11.4	32.974	9.2094e-05	0.99966141	0	92094
43	-11.2	33.364	0.000114084	0.99956931	0	114084
44	-11	33.735	0.000140925	0.99945523	0	140925
45	-10.8	34.139	0.000172052	0.9993143	0	172052
46	-10.6	34.513	0.000211184	0.99914225	0	211184
47	-10.4	34.91	0.000257614	0.99893107	0	257614
48	-10.2	35.286	0.000310943	0.99867346	0	310943
49	-10	35.679	0.000373108	0.99836251	0	373108
50	-9.8	36.053	0.000448008	0.9979894	0	448008
51	-9.6	36.445	0.00053367	0.9975414	0	533670
52	-9.4	36.822	0.000632999	0.99700773	0	632999
53	-9.2	37.215	0.000747861	0.99637473	0	747861
54	-9	37.596	0.000879137	0.99562687	0	879137
55	-8.8	37.983	0.001027911	0.99474773	0	1027911
56	-8.6	38.361	0.001198979	0.99371982	0	1198979
57	-8.4	38.751	0.001389433	0.99252084	0	1389433
58	-8.2	39.123	0.001606392	0.99113141	0	1606392
59	-8	39.51	0.001848083	0.98952501	0	1848083
60	-7.8	39.89	0.002112043	0.98767693	0	2112043
61	-7.6	40.27	0.002415366	0.98556489	0	2415366
62	-7.4	40.653	0.002731723	0.98314952	0	2731723
63	-7.2	41.035	0.003097487	0.9804178	0	3097487
64	-7	41.414	0.003477073	0.97732031	0	3477073
65	-6.8	41.794	0.003911802	0.97384324	0	3911802
66	-6.6	42.171	0.004359718	0.96993144	0	4359718
67	-6.4	42.552	0.004851673	0.96557172	0	4851673
68	-6.2	42.933	0.005375508	0.96072005	0	5375508
69	-6	43.309	0.005942713	0.95534454	0	5942713
70	-5.8	43.688	0.006515441	0.94940183	0	6515441
71	-5.6	44.065	0.007147771	0.94288638	0	7147771
72	-5.4	44.445	0.007791657	0.93573861	0	7791657
73	-5.2	44.821	0.008485342	0.92794696	0	8485342
74	-5	45.198	0.009174141	0.91946161	0	9174141
75	-4.8	45.577	0.00989766	0.91028747	0	9897660
76	-4.6	45.956	0.010637189	0.90038981	0	10637189
77	-4.4	46.329	0.011411908	0.88975262	0	11411908
78	-4.2	46.707	0.012143482	0.87834072	0	12143482
79	-4	47.079	0.012942028	0.86619723	0	12942028
80	-3.8	47.46	0.0137095	0.85325521	0	13709500
81	-3.6	47.832	0.014474895	0.83954571	0	14474895
82	-3.4	48.212	0.015235958	0.82507081	0	15235958
83	-3.2	48.582	0.015971236	0.80983485	0	15971236
84	-3	48.961	0.016693682	0.79386362	0	16693682
85	-2.8	49.331	0.017392762	0.77716993	0	17392762
86	-2.6	49.709	0.018065832	0.75977717	0	18065832
87	-2.4	50.082	0.018687027	0.74171134	0	18687027
88	-2.2	50.459	0.0192639	0.72302431	0	19263900
89	-2	50.828	0.019809097	0.70376041	0	19809097
90	-1.8	51.208	0.020290126	0.68395132	0	20290126
91	-1.6	51.574	0.020732915	0.66366119	0	20732915
92	-1.4	51.952	0.021098688	0.64292828	0	21098688
93	-1.2	52.323	0.021400725	0.62182959	0	21400725
94	-1	52.698	0.021694401	0.60042886	0	21694401
95	-0.8	53.068	0.021858906	0.57873446	0	21858906
96	-0.6	53.444	0.021959598	0.55687556	0	21959598
97	-0.4	53.812	0.021993271	0.53491596	0	21993271
98	-0.2	54.187	0.022025545	0.51292269	0	22025545
99	0	54.554	0.021906916	0.49089714	0	21906916
100	0.2	54.93	0.021772486	0.46899023	0.3755	21772486
101	0.4	55.3	0.021547971	0.44721774	0.74575	21547971
102	0.6	55.673	0.021302194	0.42566977	1.1183	21302194
103	0.8	56.041	0.020954859	0.40436757	1.4869	20954859
104	1	56.415	0.020569682	0.38341272	1.8602	20569682
105	1.2	56.785	0.020138806	0.36284303	2.2304	20138806
106	1.4	57.155	0.019672008	0.34270423	2.6007	19672008
107	1.6	57.524	0.019127362	0.32303222	2.9695	19127362
108	1.8	57.897	0.018565219	0.30390486	3.3429	18565219
109	2	58.266	0.017951807	0.28533964	3.7115	17951807
110	2.2	58.635	0.017344299	0.26738783	4.0806	17344299
111	2.4	59.004	0.016669067	0.25004353	4.4492	16669067
112	2.6	59.374	0.016027911	0.23337447	4.8191	16027911
113	2.8	59.744	0.015308084	0.21734655	5.1897	15308084
114	3	60.111	0.014624095	0.20203847	5.5568	14624095
115	3.2	60.484	0.013928028	0.18741438	5.9293	13928028
116	3.4	60.849	0.013229495	0.17348635	6.2947	13229495
117	3.6	61.219	0.012508945	0.16025685	6.6643	12508945
118	3.8	61.585	0.011817646	0.14774791	7.031	11817646
119	4	61.958	0.011131175	0.13593026	7.4036	11131175
120	4.2	62.321	0.010458954	0.12479909	7.7669	10458954
121	4.4	62.694	0.009791994	0.11434013	8.1396	9791994
122	4.6	63.059	0.009153561	0.10454814	8.5044	9153561
123	4.8	63.43	0.008525618	0.095394578	8.8753	8525618
124	5	63.793	0.007943041	0.08686896	9.2383	7943041
125	5.2	64.164	0.007348391	0.078925919	9.6091	7348391
126	5.4	64.53	0.00680385	0.071577528	9.976	6803850
127	5.6	64.9	0.006281285	0.064773678	10.345	6281285
128	5.8	65.264	0.005783866	0.058492393	10.709	5783866
129	6	65.634	0.005306164	0.052708527	11.079	5306164
130	6.2	65.997	0.004860339	0.047402363	11.443	4860339
131	6.4	66.366	0.004440415	0.042542024	11.812	4440415
132	6.6	66.728	0.004045801	0.038101609	12.174	4045801
133	6.8	67.101	0.003683022	0.034055808	12.547	3683022
134	7	67.463	0.003338798	0.030372786	12.909	3338798
135	7.2	67.836	0.003018945	0.027033988	13.281	3018945
136	7.4	68.193	0.002727645	0.024015043	13.639	2727645
137	7.6	68.566	0.002456349	0.021287398	14.012	2456349
138	7.8	68.929	0.002205577	0.018831049	14.374	2205577
139	8	69.298	0.001975918	0.016625472	14.743	1975918
140	8.2	69.659	0.001768084	0.014649554	15.104	1768084
141	8.4	70.028	0.001577455	0.01288147	15.474	1577455
142	8.6	70.39	0.001404131	0.011304015	15.836	1404131
143	8.8	70.758	0.001248347	0.009899884	16.204	1248347
144	9	71.119	0.001103416	0.008651537	16.564	1103416
145	9.2	71.481	0.000979623	0.007548121	16.927	979623
146	9.4	71.846	0.000860999	0.006568498	17.292	860999
147	9.6	72.214	0.00075923	0.005707499	17.66	759230
148	9.8	72.585	0.000666957	0.004948269	18.03	666957
149	10	72.942	0.000586211	0.004281312	18.388	586211
150	10.2	73.309	0.000510096	0.003695101	18.754	510096
151	10.4	73.675	0.000445628	0.003185005	19.12	445628
152	10.6	74.034	0.00038757	0.002739377	19.479	387570
153	10.8	74.396	0.00033686	0.002351807	19.841	336860
154	11	74.77	0.000291692	0.002014947	20.216	291692
155	11.2	75.133	0.000253223	0.001723255	20.579	253223
156	11.4	75.499	0.000217516	0.001470032	20.944	217516
157	11.6	75.86	0.000188053	0.001252516	21.305	188053
158	11.8	76.232	0.000161711	0.001064463	21.677	161711
159	12	76.574	0.000138199	0.000902752	22.02	138199
160	12.2	76.936	0.000118363	0.000764553	22.382	118363
161	12.4	77.302	0.000101021	0.00064619	22.748	101021
162	12.6	77.677	8.5662e-05	0.000545169	23.123	85662
163	12.8	78.013	7.3161e-05	0.000459507	23.458	73161
164	13	78.399	6.2187e-05	0.000386346	23.844	62187
165	13.2	78.759	5.3012e-05	0.000324159	24.204	53012
166	13.4	79.145	4.4701e-05	0.000271147	24.591	44701
167	13.6	79.473	3.7743e-05	0.000226446	24.918	37743
168	13.8	79.831	3.1561e-05	0.000188703	25.276	31561
169	14	80.222	2.6811e-05	0.000157142	25.667	26811
170	14.2	80.584	2.2129e-05	0.000130331	26.03	22129
171	14.4	80.93	1.8676e-05	0.000108202	26.375	18676
172	14.6	81.293	1.551e-05	8.9526e-05	26.739	15510
173	14.8	81.673	1.2944e-05	7.4016e-05	27.118	12944
174	15	82.04	1.0832e-05	6.1072e-05	27.486	10832
175	15.2	82.344	9.023e-06	5.024e-05	27.789	9023
176	15.4	82.751	7.236e-06	4.1217e-05	28.196	7236
177	15.6	83.145	6.03e-06	3.3981e-05	28.59	6030
178	15.8	83.511	5.272e-06	2.7951e-05	28.956	5272
179	16	83.848	4.188e-06	2.2679e-05	29.293	4188
180	16.2	84.177	3.505e-06	1.8491e-05	29.623	3505
181	16.4	84.576	2.804e-06	1.4986e-05	30.022	2804
182	16.6	84.927	2.272e-06	1.2182e-05	30.372	2272
183	16.8	85.324	1.829e-06	9.91e-06	30.77	1829
184	17	85.705	1.6e-06	8.081e-06	31.151	1600
185	17.2	86.024	1.255e-06	6.481e-06	31.469	1255
186	17.4	86.343	9.71e-07	5.226e-06	31.788	971
187	17.6	86.758	8.63e-07	4.255e-06	32.203	863
188	17.8	87.2	6.96e-07	3.392e-06	32.645	696
189	18	87.374	5.35e-07	2.696e-06	32.819	535
190	18.2	87.847	4.51e-07	2.161e-06	33.293	451
191	18.4	88.081	3.35e-07	1.71e-06	33.526	335
192	18.6	88.443	2.64e-07	1.375e-06	33.889	264
193	18.8	89.043	2.34e-07	1.111e-06	34.488	234
194	19	89.251	1.83e-07	8.77e-07	34.697	183
195	19.2	89.598	1.27e-07	6.94e-07	35.044	127
196	19.4	90.696	1.12e-07	5.67e-07	36.142	112
197	19.6	89.987	7.8e-08	4.55e-07	35.433	78
198	19.8	90.671	7.6e-08	3.77e-07	36.117	76
199	20	92.133	3.01e-07	3.01e-07	37.578	301
