# Supplementary material for: Quantifying the Potential for Future Gene Therapy to Lower Lifetime Risk of Polygenic Late-Onset Diseases
Source: MDPI journal article supplement (doi:10.3390/ijms20133352), 2019-07-08
Supplement: s2 [file s2 › SuppFiles/Results/LODsRareMedium/Alzheimers/EnvironmentArray.csv]

Age	Env	Incidence	CasesExpected
0	0	-1.18188e-05	0
1	0	-1.18124e-05	0
2	0	-1.18048e-05	0
3	0	-1.17959e-05	0
4	0	-1.17855e-05	0
5	0	-1.17732e-05	0
6	0	-1.17589e-05	0
7	0	-1.1742e-05	0
8	0	-1.17222e-05	0
9	0	-1.1699e-05	0
10	0	-1.16717e-05	0
11	0	-1.16397e-05	0
12	0	-1.16021e-05	0
13	0	-1.1558e-05	0
14	0	-1.15062e-05	0
15	0	-1.14455e-05	0
16	0	-1.13742e-05	0
17	0	-1.12905e-05	0
18	0	-1.11922e-05	0
19	0	-1.1077e-05	0
20	0	-1.09416e-05	0
21	0	-1.07828e-05	0
22	0	-1.05964e-05	0
23	0	-1.03777e-05	0
24	0	-1.01209e-05	0
25	0	-9.81952e-06	0
26	0	-9.46581e-06	0
27	0	-9.05066e-06	0
28	0	-8.56341e-06	0
29	0	-7.99153e-06	0
30	0	-7.32033e-06	0
31	0	-6.53254e-06	0
32	0	-5.60793e-06	0
33	0	-4.52272e-06	0
34	0	-3.24903e-06	0
35	0	-1.75413e-06	0
36	0	4.12359e-10	0
37	3.8932975e-09	2.05968e-06	51
38	1.057395e-08	4.47661e-06	111
39	2.0143132e-08	7.3133e-06	182
40	3.333416e-08	1.06427e-05	266
41	5.0728659e-08	1.45502e-05	363
42	7.3475963e-08	1.91365e-05	478
43	1.0307173e-07	2.45192e-05	612
44	1.413512e-07	3.08367e-05	770
45	1.903135e-07	3.82513e-05	956
46	2.5331607e-07	4.69535e-05	1173
47	3.3384233e-07	5.71668e-05	1428
48	4.3692528e-07	6.91537e-05	1728
49	5.6814045e-07	8.32219e-05	2079
50	7.3585715e-07	9.97327e-05	2492
51	9.4946902e-07	0.00011911	2976
52	1.222375e-06	0.000141852	3544
53	1.569933e-06	0.000168541	4210
54	2.0130097e-06	0.000199863	4991
55	2.5794791e-06	0.000236621	5908
56	3.3016923e-06	0.000279757	6984
57	4.2291415e-06	0.000330378	8245
58	5.4152122e-06	0.000389781	9725
59	6.9324896e-06	0.000459486	11459
60	8.8841345e-06	0.000541278	13493
61	1.1387905e-05	0.000637247	15877
62	1.4609885e-05	0.000749847	18671
63	1.8755598e-05	0.000881949	21943
64	2.4119161e-05	0.00103692	25777
65	3.1048501e-05	0.00121871	30264
66	3.9999014e-05	0.00143194	35516
67	5.1632641e-05	0.001682	41659
68	6.6747411e-05	0.00197524	48839
69	8.6446666e-05	0.00231904	57227
70	0.00011214087	0.00272205	67016
71	0.00014578816	0.00319438	78431
72	0.00018990168	0.00374779	91725
73	0.00024792186	0.00439603	107187
74	0.00032445459	0.00515507	125142
75	0.00042584719	0.0060435	145952
76	0.00056064838	0.00708288	170020
77	0.0007401767	0.00829818	197783
78	0.00098087733	0.00971826	229709
79	0.0013051166	0.0113764	266289
80	0.0017441582	0.0133107	308022
81	0.002342412	0.0155649	355395
82	0.003164972	0.0181888	408836
83	0.0043050604	0.0212387	468700
84	0.0059008989	0.0247781	535202
85	0.0081626368	0.0288776	608301
86	0.011419549	0.0336158	687680
87	0.016193849	0.0390781	772576
88	0.023341704	0.0453571	861638
89	0.03429893	0.0525507	953024
90	0.051566105	0.0607607	1044006
91	0.079474265	0.0700898	1131079
92	0.12541274	0.0806382	1210185
93	0.20159875	0.0924985	1276180
94	0.32987197	0.10575	1323980
95	0.5487579	0.120452	1348509
96	0.92725102	0.136637	1345371
97	1.5885917	0.154301	1311786
98	2.7536941	0.173401	1246611
99	4.8284855	0.193844	1151767
100	8.5614777	0.215489	1032000
101	15.294991	0.238145	894756
102	27.517206	0.261577	748832
103	49.814277	0.285513	603354
104	90.502202	0.309654	467466
105	164.49819	0.333693	347757
106	298.94312	0.357328	248248
107	543.52546	0.380277	169817
108	983.18832	0.402289	111372
109	1773.3507	0.423159	70041
110	3178.1072	0.442728	42273
111	5645.5839	0.460888	24529
112	9938.5001	0.477578	13695
113	17213.439	0.492782	7381
114	30030.563	0.506522	3845
115	51625.672	0.518847	1941
116	87878.633	0.529832	953
117	149239.75	0.539564	456
118	252000.34	0.548143	214
119	397905.1	0.555671	98
