# Supplementary material for: Quantifying the Potential for Future Gene Therapy to Lower Lifetime Risk of Polygenic Late-Onset Diseases
Source: MDPI journal article supplement (doi:10.3390/ijms20133352), 2019-07-08
Supplement: s2 [file s2 › SuppFiles/Results/LODsRareMedium/Alzheimers/FrailtyAnalysis.csv]

Age	Heritability	MeanOR	CaseOR	nControls	nCases	nCumIncidence	nIncidence	nLifeIncidence0	nAbsIncidence0	nLifeIncidence5	nAbsIncidence5	nLifeIncidence10	nAbsIncidence10	nLifeIncidence15	nAbsIncidence15
38	0.79963	0.99992	1.824e+05	9999984	16	1.6e-06	1.6e-06	1.5559e-06	1.5559e-06	1.5658e-06	1.5658e-06	1.5741e-06	1.5741e-06	1.5813e-06	1.5813e-06
39	0.79962	0.99986	34013	9999932	52	6.8e-06	5.2e-06	6.6053e-06	5.0494e-06	6.6489e-06	5.0831e-06	6.6848e-06	5.1107e-06	6.716e-06	5.1347e-06
40	0.79961	0.99977	39239	9999844	88	1.56e-05	8.8001e-06	1.5137e-05	8.5319e-06	1.5241e-05	8.5917e-06	1.5325e-05	8.6402e-06	1.5398e-05	8.6818e-06
41	0.7996	0.99966	25532	9999733	111	2.67e-05	1.11e-05	2.5881e-05	1.0744e-05	2.6064e-05	1.0824e-05	2.6212e-05	1.0887e-05	2.6339e-05	1.0941e-05
42	0.79958	0.99952	14147	9999591	142	4.09e-05	1.42e-05	3.9603e-05	1.3722e-05	3.9892e-05	1.3828e-05	4.0124e-05	1.3913e-05	4.0322e-05	1.3984e-05
43	0.79956	0.99934	21743	9999407	184	5.93e-05	1.8401e-05	5.7349e-05	1.7748e-05	5.7785e-05	1.7894e-05	5.8131e-05	1.8008e-05	5.8424e-05	1.8103e-05
44	0.79954	0.99911	13008	9999171	236	8.29e-05	2.3601e-05	8.0067e-05	2.2718e-05	8.0702e-05	2.2918e-05	8.12e-05	2.3071e-05	8.1619e-05	2.3196e-05
45	0.79951	0.99884	11090	9998875	296	0.0001125	2.9602e-05	0.0001085	2.8434e-05	0.0001094	2.87e-05	0.0001101	2.8902e-05	0.00011068	2.9065e-05
46	0.79947	0.99846	7954.6	9998459	416	0.0001541	4.1605e-05	0.00014836	3.9869e-05	0.00014967	4.0271e-05	0.00015066	4.0569e-05	0.00015148	4.0806e-05
47	0.79943	0.99806	7954.1	9998013	446	0.0001987	4.4607e-05	0.00019099	4.2636e-05	0.00019276	4.3103e-05	0.0001941	4.3439e-05	0.00019518	4.3703e-05
48	0.79939	0.99759	7116.5	9997480	533	0.000252	5.3311e-05	0.0002418	5.0814e-05	0.00024417	5.1418e-05	0.00024593	5.1842e-05	0.00024734	5.2172e-05
49	0.79932	0.99694	7093.6	9996748	732	0.0003252	7.3218e-05	0.00031135	6.9575e-05	0.00031463	7.0479e-05	0.00031701	7.1097e-05	0.00031889	7.1572e-05
50	0.79925	0.99622	6082.1	9995910	838	0.000409	8.3827e-05	0.00039071	7.9388e-05	0.00039512	8.0518e-05	0.00039825	8.1273e-05	0.00040071	8.1843e-05
51	0.79917	0.99534	5412.4	9994889	1021	0.0005111	0.00010214	0.00048705	9.6374e-05	0.00049296	9.7879e-05	0.00049708	9.8869e-05	0.00050027	9.9598e-05
52	0.79908	0.99434	5277.3	9993721	1168	0.0006279	0.00011686	0.0005968	0.00010981	0.0006046	0.0001117	0.00060994	0.00011292	0.00061401	0.0001138
53	0.79897	0.99317	3904.5	9992295	1426	0.0007705	0.00014269	0.00073021	0.00013348	0.00074052	0.00013601	0.00074748	0.00013762	0.00075268	0.00013876
54	0.79884	0.99175	3814.7	9990564	1731	0.0009436	0.00017323	0.00089135	0.00016127	0.00090501	0.00016461	0.00091411	0.00016675	0.00092077	0.00016821
55	0.7987	0.99015	3333	9988574	1990	0.0011426	0.00019919	0.0010756	0.00018445	0.0010935	0.00018864	0.0011052	0.00019132	0.0011137	0.00019312
56	0.79854	0.98829	2911.8	9986223	2351	0.0013777	0.00023537	0.0012921	0.00021669	0.0013153	0.00022208	0.0013305	0.00022555	0.0013413	0.00022783
57	0.79835	0.9861	2413	9983389	2834	0.0016611	0.00028379	0.0015513	0.00025964	0.0015816	0.00026667	0.0016014	0.00027125	0.0016151	0.00027422
58	0.79814	0.98358	2176.9	9980067	3322	0.0019933	0.00033275	0.0018532	0.00030237	0.0018924	0.00031129	0.0019181	0.00031717	0.0019355	0.00032094
59	0.7979	0.98064	1954.5	9976132	3935	0.0023868	0.00039429	0.0022082	0.00035566	0.0022587	0.00036705	0.002292	0.00037467	0.0023143	0.00037954
60	0.79763	0.9773	1714.9	9971575	4557	0.0028425	0.00045679	0.002616	0.00040882	0.0026807	0.00042298	0.0027235	0.0004326	0.002752	0.00043876
61	0.79731	0.97337	1643.2	9966172	5403	0.0033828	0.00054184	0.0030955	0.00048089	0.0031781	0.00049884	0.0032333	0.00051125	0.0032698	0.00051923
62	0.79694	0.96874	1350.9	9959612	6560	0.0040388	0.00065823	0.0036725	0.00057895	0.0037783	0.0006022	0.0038498	0.00061853	0.0038968	0.00062915
63	0.79653	0.96356	1236	9952143	7469	0.0047857	0.00074993	0.0043232	0.00065327	0.004457	0.00068145	0.0045485	0.00070155	0.0046087	0.0007148
64	0.79607	0.95758	1073.7	9943326	8817	0.0056674	0.00088594	0.0050833	0.0007638	0.0052523	0.00079916	0.0053693	0.00082475	0.0054465	0.00084186
65	0.79555	0.95084	966.16	9933186	10140	0.0066814	0.0010198	0.0059479	0.0008695	0.0061598	0.00091269	0.0063082	0.0009443	0.0064068	0.00096577
66	0.79495	0.94301	860.28	9921126	12060	0.0078874	0.0012141	0.006964	0.001023	0.0072301	0.0010775	0.0074185	0.0011178	0.0075447	0.0011456
67	0.79428	0.93405	735.05	9906920	14206	0.009308	0.0014319	0.0081458	0.0011911	0.0084797	0.0012594	0.0087182	0.00131	0.0088796	0.0013455
68	0.79351	0.92386	675.33	9890451	16469	0.010955	0.0016624	0.009497	0.0013639	0.0099143	0.0014481	0.010215	0.0015106	0.01042	0.0015551
69	0.79263	0.91215	582.74	9870922	19529	0.012908	0.0019745	0.011075	0.0015959	0.011598	0.0017023	0.011976	0.0017811	0.012238	0.0018381
70	0.79166	0.8989	488.55	9847977	22945	0.015202	0.0023245	0.0129	0.0018485	0.013554	0.001982	0.01403	0.0020804	0.014363	0.0021525
71	0.79054	0.88382	436.64	9821130	26847	0.017887	0.0027261	0.014997	0.0021297	0.015816	0.002297	0.016413	0.0024195	0.016835	0.0025098
72	0.78925	0.86658	388.4	9789430	31700	0.021057	0.0032277	0.017426	0.002473	0.018453	0.002685	0.019201	0.002839	0.019735	0.002953
73	0.78781	0.84737	334.73	9752731	36699	0.024727	0.0037488	0.020178	0.0028115	0.021464	0.0030758	0.022398	0.0032657	0.02307	0.0034065
74	0.78618	0.82589	289.91	9709998	42733	0.029	0.0043816	0.023309	0.00321	0.024918	0.0035415	0.026082	0.0037776	0.026924	0.0039524
75	0.7843	0.80173	259.92	9660142	49856	0.033986	0.0051345	0.026869	0.0036664	0.028883	0.004083	0.030333	0.0043779	0.031386	0.0045953
76	0.78218	0.77488	218.07	9601801	58341	0.03982	0.0060394	0.03092	0.0041934	0.033441	0.0047181	0.035248	0.0050886	0.036564	0.00536
77	0.77975	0.74511	187.94	9533784	68017	0.046622	0.0070838	0.0355	0.0047694	0.038652	0.0054274	0.040907	0.0058927	0.042547	0.0062306
78	0.77698	0.7124	159.77	9454711	79073	0.054529	0.008294	0.040645	0.0053975	0.044582	0.0062203	0.047394	0.0068048	0.049435	0.007225
79	0.7738	0.67665	136.74	9362999	91712	0.0637	0.0097001	0.046394	0.0060797	0.051301	0.0071064	0.054807	0.0078402	0.057342	0.0083629
80	0.77014	0.63783	114.17	9256356	106643	0.074364	0.01139	0.052805	0.0068479	0.058916	0.0081331	0.063287	0.0090573	0.066434	0.0097114
81	0.76596	0.59636	95.867	9133868	122488	0.086613	0.013233	0.059838	0.007598	0.067421	0.0091881	0.072856	0.010338	0.076755	0.01115
82	0.76108	0.55209	80.172	8992342	141526	0.10077	0.015495	0.067558	0.0084522	0.07695	0.010432	0.0837	0.011872	0.088528	0.012889
83	0.75543	0.50541	64.663	8828600	163742	0.11714	0.018209	0.075994	0.0093808	0.087606	0.01185	0.09598	0.013656	0.10196	0.01494
84	0.74882	0.45687	52.293	8640535	188065	0.13595	0.021302	0.085084	0.010297	0.099393	0.013351	0.10976	0.015606	0.11716	0.017217
85	0.74111	0.40738	41.6	8426392	214143	0.15736	0.024784	0.094727	0.01116	0.11227	0.014901	0.12505	0.017697	0.13419	0.019708
86	0.7321	0.35773	32.031	8182743	243649	0.18173	0.028915	0.10487	0.012034	0.12626	0.016602	0.14197	0.020077	0.15323	0.022589
87	0.7215	0.30886	24.444	7907790	274953	0.20922	0.033602	0.11535	0.01281	0.14126	0.018329	0.16048	0.022623	0.17429	0.025745
88	0.70913	0.2618	17.861	7598219	309571	0.24018	0.039148	0.12605	0.013532	0.1572	0.020168	0.18062	0.025476	0.19751	0.02936
89	0.69496	0.21784	12.531	7253507	344712	0.27465	0.045367	0.13673	0.014055	0.17387	0.021929	0.20223	0.028435	0.22276	0.033236
90	0.67897	0.17779	8.5306	6872864	380643	0.31271	0.052477	0.14716	0.014379	0.19101	0.023631	0.22512	0.031551	0.24994	0.037472
91	0.66152	0.14233	5.5625	6455727	417137	0.35443	0.060693	0.15712	0.014493	0.20837	0.02526	0.24907	0.034849	0.27891	0.042142
92	0.64331	0.11184	3.4775	6002970	452757	0.3997	0.070133	0.16639	0.014356	0.22563	0.026737	0.27376	0.038257	0.30939	0.047219
93	0.62482	0.086363	2.1362	5519222	483748	0.44808	0.080585	0.17472	0.013886	0.24235	0.027856	0.29869	0.041515	0.34087	0.052443
94	0.60543	0.065312	1.3328	5007952	511270	0.4992	0.092634	0.18199	0.013174	0.25819	0.028698	0.3234	0.044777	0.37292	0.05806
95	0.5852	0.048382	0.82496	4478149	529803	0.55219	0.10579	0.18808	0.012152	0.27271	0.028988	0.34726	0.047639	0.40477	0.063606
96	0.56416	0.035079	0.50446	3938049	540100	0.6062	0.12061	0.19298	0.010932	0.2856	0.028799	0.36973	0.050196	0.43578	0.06925
97	0.54246	0.024904	0.3063	3400438	537611	0.65996	0.13652	0.19673	0.0095344	0.29661	0.027944	0.39023	0.052045	0.46511	0.074469
98	0.51998	0.017287	0.18448	2876131	524307	0.71239	0.15419	0.19949	0.008101	0.30564	0.02657	0.40835	0.053298	0.49212	0.079434
99	0.49686	0.01173	0.10972	2377206	498925	0.76228	0.17347	0.20141	0.0066951	0.31274	0.024669	0.42381	0.05374	0.51623	0.083851
100	0.47324	0.0077876	0.064532	1916767	460439	0.80832	0.19369	0.20269	0.0053681	0.31803	0.022248	0.43643	0.053072	0.53697	0.087219
101	0.44963	0.0050718	0.037238	1504460	412307	0.84955	0.21511	0.20349	0.0041881	0.32176	0.019497	0.44627	0.051364	0.55413	0.089525
102	0.42596	0.0032304	0.02136	1145183	359277	0.88548	0.23881	0.20397	0.0031917	0.32427	0.016678	0.45363	0.048883	0.56782	0.091042
103	0.40238	0.0020211	0.012107	845185	299998	0.91548	0.26197	0.20424	0.002342	0.32585	0.013764	0.4588	0.045142	0.5782	0.090553
104	0.37917	0.0012455	0.0068035	604219	240966	0.93958	0.2851	0.20438	0.0016579	0.32678	0.011004	0.46222	0.040545	0.58566	0.088324
105	0.35639	0.00075666	0.0037941	417440	186779	0.95826	0.30912	0.20445	0.0011345	0.3273	0.0085674	0.46437	0.035508	0.59078	0.084702
106	0.3343	0.00045219	0.0021028	277613	139827	0.97224	0.33496	0.20448	0.00075032	0.32757	0.0065217	0.46563	0.030361	0.59412	0.079984
107	0.31255	0.0002681	0.0011558	178293	99320	0.98217	0.35776	0.20449	0.00047046	0.3277	0.0047815	0.46633	0.024986	0.59615	0.073233
108	0.29202	0.00015842	0.00063509	110740	67553	0.98893	0.37889	0.2045	0.00028227	0.32776	0.0033873	0.46668	0.019907	0.59731	0.06529
109	0.27269	9.2693e-05	0.00034866	65939	44801	0.99341	0.40456	0.2045	0.00016182	0.32779	0.0023525	0.46686	0.015614	0.59795	0.057533
110	0.25487	5.4478e-05	0.00019153	38063	27876	0.99619	0.42275	0.2045	8.6665e-05	0.3278	0.0015515	0.46693	0.011717	0.59827	0.04856
111	0.23872	3.1962e-05	0.0001065	21199	16864	0.99788	0.44305	0.2045	4.4305e-05	0.3278	0.00099244	0.46697	0.0086263	0.59842	0.040158
112	0.22577	1.8715e-05	5.8904e-05	11303	9896	0.99887	0.46681	0.2045	2.1007e-05	0.3278	0.00061386	0.46698	0.006239	0.59849	0.032602
113	0.2108	1.1089e-05	3.3999e-05	6023	5280	0.9994	0.46713	0.2045	9.3427e-06	0.3278	0.00034801	0.46698	0.0041762	0.59852	0.024543
114	0.19881	6.5913e-06	1.8962e-05	3058	2965	0.99969	0.49228	0.2045	2.4614e-06	0.3278	0.00019691	0.46699	0.0028626	0.59853	0.019
115	0.18695	3.9792e-06	1.0882e-05	1524	1534	0.99985	0.50164	0.2045	0	0.3278	0.00010284	0.46699	0.001841	0.59854	0.013903
116	0.17997	2.3502e-06	6.2687e-06	706	818	0.99993	0.53675	0.2045	0	0.3278	5.3675e-05	0.46699	0.0012023	0.59854	0.01045
117	0.18329	1.4677e-06	3.578e-06	333	373	0.99997	0.52833	0.2045	0	0.3278	2.3775e-05	0.46699	0.00069475	0.59854	0.0070611
118	0.17486	8.7138e-07	2.2739e-06	152	181	0.99998	0.54354	0.2045	0	0.3278	1.0871e-05	0.46699	0.00040494	0.59854	0.0048593
119	0.1714	4.9525e-07	1.286e-06	62	90	0.99999	0.59211	0.2045	0	0.3278	2.9605e-06	0.46699	0.00023684	0.59854	0.0034431
120	0.18661	2.7687e-07	7.5376e-07	26	36	1	0.58065	0.2045	0	0.3278	0	0.46699	0.00011903	0.59854	0.002131
