# Supplementary material for: Quantifying the Potential for Future Gene Therapy to Lower Lifetime Risk of Polygenic Late-Onset Diseases
Source: MDPI journal article supplement (doi:10.3390/ijms20133352), 2019-07-08
Supplement: s2 [file s2 › SuppFiles/Results/LODsRareMedium/BreastCancer/-1.000/FrailtyAnalysis.csv]

Age	Heritability	MeanOR	CaseOR	nControls	nCases	nCumIncidence	nIncidence	nLifeIncidence0	nAbsIncidence0	nLifeIncidence5	nAbsIncidence5	nLifeIncidence10	nAbsIncidence10	nLifeIncidence15	nAbsIncidence15	nIncActDivExp
26	0.106826	0.625217	0.80907	999996039	3961	3.961e-06	3.961e-06	3.91858e-06	3.91858e-06	3.92717e-06	3.92717e-06	3.93244e-06	3.93244e-06	3.93462e-06	3.93462e-06	0.325906
27	0.106826	0.625215	0.810634	999980470	15569	1.953e-05	1.55691e-05	1.93127e-05	1.53942e-05	1.93575e-05	1.54303e-05	1.93862e-05	1.54539e-05	1.93985e-05	1.5464e-05	0.319358
28	0.106828	0.62521	0.811973	999952156	28314	4.7844e-05	2.83146e-05	4.72932e-05	2.7981e-05	4.74078e-05	2.80509e-05	4.74842e-05	2.80985e-05	4.75191e-05	2.81212e-05	0.321382
29	0.106829	0.625203	0.81138	999910283	41873	8.9717e-05	4.1875e-05	8.86491e-05	4.13578e-05	8.88726e-05	4.14667e-05	8.90264e-05	4.15442e-05	8.9102e-05	4.15848e-05	0.321091
30	0.106832	0.625194	0.813963	999853708	56575	0.000146292	5.65801e-05	0.000144491	5.58474e-05	0.000144869	5.60018e-05	0.000145137	5.61161e-05	0.000145278	5.61806e-05	0.32164
31	0.106834	0.625182	0.813365	999780819	72889	0.000219181	7.28997e-05	0.00021639	7.1909e-05	0.000216978	7.21189e-05	0.000217404	7.22771e-05	0.000217641	7.23741e-05	0.324242
32	0.106838	0.625167	0.811799	999691280	89539	0.00030872	8.95586e-05	0.000304653	8.82824e-05	0.000305511	8.85529e-05	0.000306145	8.87607e-05	0.000306517	8.88959e-05	0.322813
33	0.106842	0.625149	0.814314	999583220	108060	0.00041678	0.000108093	0.000411097	0.000106477	0.000412298	0.00010682	0.000413199	0.000107087	0.000413753	0.000107269	0.323642
34	0.106847	0.625128	0.812825	999454278	128942	0.000545722	0.000128996	0.000538016	0.000126972	0.000539648	0.000127403	0.000540884	0.000127738	0.000541676	0.000127977	0.326732
35	0.106853	0.625104	0.812415	999303969	150309	0.000696031	0.000150391	0.000685847	0.000147911	0.00068801	0.000148444	0.000689657	0.000148854	0.000690753	0.000149158	0.326797
36	0.10686	0.625075	0.812899	999130370	173599	0.00086963	0.00017372	0.000856436	0.000170708	0.00085925	0.000171359	0.000861397	0.000171859	0.000862869	0.000172236	0.327459
37	0.106868	0.625042	0.812522	998930970	199400	0.00106903	0.000199574	0.0010522	0.000195931	0.00105581	0.00019673	0.00105856	0.000197332	0.00106049	0.000197795	0.329268
38	0.106877	0.625005	0.813362	998703943	227027	0.00129606	0.00022727	0.00127486	0.000222897	0.00127944	0.000223872	0.00128291	0.000224593	0.00128541	0.000225154	0.330621
39	0.106888	0.624963	0.81229	998446731	257212	0.00155327	0.000257546	0.00152685	0.000252318	0.00153262	0.000253505	0.00153695	0.000254365	0.00154011	0.000255035	0.332398
40	0.106899	0.624915	0.812704	998157309	289422	0.00184269	0.000289872	0.00181006	0.000283657	0.00181727	0.000285092	0.00182262	0.000286118	0.00182657	0.00028691	0.333647
41	0.106912	0.624861	0.813314	997831028	326281	0.00216897	0.000326883	0.00212895	0.000319479	0.00213789	0.000321215	0.00214447	0.000322441	0.00214936	0.000323382	0.337043
42	0.106927	0.624801	0.812321	997465680	365348	0.00253432	0.000366142	0.00248555	0.000357369	0.00249657	0.00035946	0.00250461	0.000360925	0.00251061	0.00036203	0.339486
43	0.106943	0.624734	0.812985	997057825	407855	0.00294217	0.000408891	0.00288306	0.000398518	0.00289658	0.000401024	0.00290637	0.000402778	0.00291366	0.000404075	0.342065
44	0.106961	0.624659	0.812379	996604806	453019	0.00339519	0.000454356	0.00332389	0.000442138	0.0033404	0.000445132	0.00335228	0.000447227	0.00336108	0.000448745	0.34395
45	0.106981	0.624577	0.812758	996103610	501196	0.00389639	0.000502903	0.00381078	0.000488551	0.00383085	0.000492121	0.00384521	0.000494611	0.00385579	0.000496391	0.345382
46	0.107003	0.624485	0.812611	995546407	557203	0.00445359	0.000559383	0.00435108	0.000542411	0.00437543	0.000546713	0.00439275	0.000549683	0.00440542	0.000551781	0.349324
47	0.107028	0.624383	0.812216	994928298	618109	0.0050717	0.000620874	0.00494923	0.000600826	0.00497873	0.000605998	0.00499958	0.000609543	0.00501472	0.000612027	0.35327
48	0.107055	0.62427	0.812184	994247694	680604	0.00575231	0.000684073	0.00560642	0.000660534	0.00564207	0.000666718	0.00566709	0.000670912	0.00568515	0.000673847	0.355282
49	0.107085	0.624146	0.812228	993496496	751198	0.0065035	0.000755544	0.00633002	0.000727793	0.00637307	0.000735228	0.00640304	0.000740207	0.00642456	0.00074369	0.358756
50	0.107119	0.624009	0.811775	992668043	828453	0.00733196	0.000833876	0.00712593	0.000801121	0.00717788	0.000810077	0.00721373	0.000815998	0.00723935	0.000820125	0.362529
51	0.107155	0.623858	0.812566	991756910	911133	0.00824309	0.000917863	0.00799875	0.000879257	0.00806137	0.000890015	0.00810422	0.000897073	0.00813468	0.000901947	0.365838
52	0.107195	0.623691	0.81198	990754231	1002679	0.00924577	0.00101101	0.00895618	0.000965396	0.00903167	0.000978367	0.00908288	0.000986789	0.00911906	0.000992562	0.369873
53	0.107237	0.623519	0.811854	989716875	1037356	0.0102831	0.00104704	0.00994328	0.000996308	0.0100333	0.00101101	0.0100939	0.00102047	0.0101365	0.00102689	0.373422
54	0.10728	0.623341	0.811835	988649375	1067500	0.0113506	0.00107859	0.0109552	0.00102244	0.0110616	0.00103897	0.0111327	0.00104959	0.0111823	0.0010567	0.377394
55	0.107324	0.623158	0.811908	987551019	1098356	0.012449	0.00111097	0.0119921	0.00104881	0.0121168	0.00106733	0.0121997	0.00107926	0.0122571	0.00108715	0.3815
56	0.107369	0.62297	0.811767	986423289	1127730	0.0135767	0.00114195	0.013052	0.00107328	0.0131971	0.00109392	0.0132932	0.0011073	0.0133593	0.00111608	0.384986
57	0.107416	0.622776	0.811277	985264913	1158376	0.0147351	0.00117432	0.0141356	0.00109845	0.0143032	0.00112133	0.0144142	0.0011364	0.0144899	0.00114618	0.388809
58	0.107464	0.622577	0.811677	984077610	1187303	0.0159224	0.00120506	0.0152404	0.00112139	0.015433	0.00114667	0.0155607	0.00116359	0.0156471	0.00117449	0.391966
59	0.107513	0.622373	0.811446	982857762	1219848	0.0171422	0.00123959	0.0163693	0.00114714	0.0165894	0.00117505	0.0167357	0.00119406	0.0168341	0.00120625	0.396223
60	0.107564	0.622162	0.811726	981607804	1249958	0.0183922	0.00127176	0.0175192	0.00116998	0.0177694	0.0012006	0.0179366	0.0012218	0.0180484	0.00123546	0.399597
61	0.107616	0.621946	0.810952	980324143	1283661	0.0196759	0.00130771	0.0186927	0.00119551	0.0189759	0.00122908	0.0191662	0.00125271	0.0192931	0.00126804	0.404027
62	0.107669	0.621725	0.810795	979010234	1313909	0.0209898	0.00134028	0.0198859	0.0012171	0.0202049	0.00125368	0.0204209	0.00127981	0.0205646	0.001297	0.407281
63	0.107723	0.621498	0.811111	977664334	1345900	0.0223357	0.00137476	0.0210993	0.00123944	0.0214573	0.00127931	0.0217015	0.00130815	0.0218642	0.00132745	0.411001
64	0.107779	0.621265	0.810101	976286741	1377593	0.0237133	0.00140907	0.0223317	0.00126056	0.0227322	0.00130398	0.0230074	0.00133571	0.0231912	0.00135731	0.414553
65	0.107837	0.621026	0.810054	974874243	1412498	0.0251258	0.00144681	0.0235848	0.00128353	0.0240316	0.00133102	0.0243409	0.00136586	0.0245482	0.00138998	0.418988
66	0.107896	0.620782	0.810029	973429611	1444632	0.0265704	0.00148186	0.0248549	0.00130277	0.0253523	0.00135472	0.0256987	0.00139276	0.0259321	0.00141954	0.422521
67	0.107956	0.62053	0.809764	971950204	1479407	0.0280498	0.00151979	0.0261427	0.00132296	0.0266958	0.0013801	0.0270825	0.00142159	0.0273447	0.00145122	0.426751
68	0.108018	0.620273	0.810003	970437889	1512315	0.0295621	0.00155596	0.027445	0.0013399	0.0280592	0.00140281	0.0284898	0.00144793	0.0287838	0.00148057	0.43037
69	0.108081	0.620008	0.809902	968887066	1550823	0.0311129	0.00159807	0.0287648	0.00135999	0.0294466	0.00142965	0.029925	0.00147888	0.0302539	0.00151487	0.435499
70	0.108146	0.619738	0.809672	967306125	1580941	0.0326939	0.00163171	0.0300928	0.00137073	0.0308491	0.00144757	0.0313794	0.00150112	0.0317464	0.00154041	0.438207
71	0.108212	0.619461	0.809258	965691006	1615119	0.034309	0.00166971	0.0314305	0.00138282	0.032269	0.00146791	0.0328559	0.00152645	0.0332644	0.00156931	0.441991
72	0.108279	0.619177	0.809551	964040602	1650404	0.0359594	0.00170904	0.032776	0.00139329	0.0337057	0.0014877	0.0343546	0.00155196	0.0348081	0.00159862	0.446015
73	0.108349	0.618886	0.809505	962352704	1687898	0.0376473	0.00175086	0.0341282	0.00140273	0.0351592	0.00150773	0.0358764	0.00157852	0.0363788	0.0016293	0.450567
74	0.108419	0.61859	0.808679	960631363	1721341	0.0393686	0.00178868	0.0354811	0.00140574	0.0366241	0.0015222	0.0374163	0.00160017	0.0379718	0.00165528	0.45398
75	0.108492	0.618286	0.808616	958873831	1757532	0.0411262	0.00182956	0.0368334	0.00140779	0.0381005	0.00153694	0.0389755	0.00162309	0.0395887	0.00168314	0.458065
76	0.108566	0.617976	0.808465	957081811	1792020	0.0429182	0.00186888	0.0381807	0.00140506	0.0395847	0.00154777	0.0405509	0.00164301	0.0412269	0.00170853	0.461657
77	0.108641	0.617657	0.808738	955250425	1831386	0.0447496	0.00191351	0.0395227	0.00140222	0.0410777	0.00155999	0.0421452	0.00166569	0.04289	0.00173764	0.466448
78	0.108719	0.617332	0.808261	953381991	1868434	0.046618	0.00195596	0.0408535	0.00139313	0.0425746	0.00156706	0.0437541	0.00168436	0.0445745	0.00176344	0.470591
79	0.108797	0.617	0.807424	951477826	1904165	0.0485222	0.00199727	0.0421676	0.00137828	0.0440711	0.00156968	0.0453746	0.00169972	0.046278	0.00178678	0.474356
80	0.108878	0.61666	0.807807	949535158	1942668	0.0504648	0.00204174	0.0434618	0.00136023	0.045566	0.00157106	0.0470066	0.00171518	0.0480015	0.00181133	0.478764
81	0.10896	0.616313	0.807122	947556034	1979124	0.052444	0.00208431	0.0447296	0.00133519	0.0470539	0.00156702	0.0486456	0.00172618	0.0497414	0.0018324	0.482624
82	0.109044	0.61596	0.807011	945541250	2014784	0.0544588	0.0021263	0.0459647	0.0013035	0.0485303	0.00155815	0.0502882	0.00173346	0.0514952	0.00185092	0.486255
83	0.10913	0.615597	0.80682	943484675	2056575	0.0565153	0.00217502	0.0471648	0.00126913	0.0499951	0.00154916	0.0519359	0.00174256	0.0532662	0.001873	0.49132
84	0.109217	0.615228	0.806461	941392809	2091866	0.0586072	0.00221717	0.0483197	0.00122417	0.0514387	0.00153002	0.0535799	0.0017425	0.0550464	0.00188686	0.494794
85	0.109306	0.614849	0.806667	939259486	2133323	0.0607405	0.00226613	0.0494272	0.00117642	0.0528599	0.00150972	0.0552214	0.00174372	0.0568386	0.00190369	0.499688
86	0.109397	0.614463	0.806306	937086163	2173323	0.0629138	0.00231387	0.0504806	0.00112146	0.0542521	0.00148224	0.0568554	0.00173961	0.0586385	0.0019163	0.504199
87	0.10949	0.614069	0.806182	934875824	2210339	0.0651242	0.00235874	0.0514727	0.00105881	0.0556072	0.001446	0.0584751	0.00172848	0.0604404	0.00192296	0.507987
88	0.109585	0.613666	0.805684	932622485	2253339	0.0673775	0.00241031	0.0524009	0.00099283	0.056922	0.00140641	0.06008	0.00171674	0.0622458	0.00193107	0.513115
89	0.109682	0.613255	0.805581	930332236	2290249	0.0696678	0.00245571	0.0532573	0.000918288	0.0581865	0.00135587	0.0616605	0.00169464	0.0640457	0.00192997	0.516828
90	0.10978	0.612836	0.805058	928000800	2331436	0.0719992	0.00250603	0.0540391	0.000840295	0.0593968	0.00130095	0.0632137	0.00166954	0.0658397	0.00192831	0.52148
91	0.109881	0.612407	0.805223	925629690	2371110	0.0743703	0.00255507	0.0547421	0.000757579	0.060546	0.00123837	0.0647326	0.00163675	0.0676223	0.00192096	0.525768
92	0.109983	0.611971	0.804551	923218366	2411324	0.0767816	0.00260506	0.0553645	0.000672393	0.0616284	0.00116939	0.0662109	0.00159701	0.0693893	0.00190899	0.530153
93	0.110087	0.611526	0.804185	920766209	2452157	0.0792338	0.0026561	0.055906	0.000586546	0.0626385	0.00109407	0.0676417	0.00154983	0.0711359	0.0018918	0.534652
94	0.110194	0.611072	0.804237	918275944	2490265	0.0817241	0.00270456	0.0563676	0.000501317	0.0635697	0.00101134	0.0690166	0.00149327	0.0728544	0.00186636	0.538542
95	0.110302	0.610608	0.803991	915741836	2534108	0.0842582	0.00275964	0.0567538	0.000420569	0.0644194	0.000925334	0.0703322	0.00143261	0.0745426	0.0018385	0.543653
96	0.110412	0.610136	0.80351	913169165	2572671	0.0868308	0.00280938	0.057069	0.00034415	0.0651822	0.000832983	0.0715791	0.00136162	0.0761906	0.00179966	0.547617
97	0.110524	0.609653	0.803509	910552615	2616550	0.0894474	0.00286535	0.0573207	0.000275647	0.0658576	0.000739576	0.0727536	0.00128623	0.0777947	0.00175657	0.552698
98	0.110638	0.609163	0.802745	907895804	2656811	0.0921042	0.0029178	0.0575167	0.000215275	0.0664443	0.000644338	0.073848	0.00120187	0.0793449	0.00170254	0.557002
99	0.110755	0.608663	0.802531	905198102	2697702	0.0948019	0.00297138	0.0576657	0.000164169	0.0669443	0.000550775	0.0748568	0.00111112	0.0808344	0.00164059	0.561432
100	0.110873	0.608153	0.802378	902461794	2736308	0.0975382	0.00302288	0.0577764	0.000122215	0.0673614	0.000460687	0.0757743	0.0010136	0.0822549	0.00156927	0.565384
101	0.110993	0.607634	0.801747	899682004	2779790	0.100318	0.00308023	0.0578568	8.91111e-05	0.0677019	0.000377328	0.0765985	0.000913288	0.0836022	0.0014929	0.570339
102	0.111116	0.607104	0.801657	896857371	2824633	0.103143	0.00313959	0.0579139	6.34511e-05	0.0679736	0.000302029	0.0773275	0.00081036	0.0848701	0.00140933	0.575565
103	0.111241	0.606564	0.801124	893992929	2864442	0.106007	0.00319387	0.0579533	4.39157e-05	0.0681849	0.000235643	0.0779601	0.000705301	0.08605	0.00131559	0.579765
104	0.111367	0.606015	0.800817	891087988	2904941	0.108912	0.0032494	0.0579797	2.9537e-05	0.0683454	0.000179529	0.0784986	0.000602309	0.0871363	0.00121508	0.584109
105	0.111496	0.605455	0.800691	888138973	2949015	0.111861	0.00330945	0.0579969	1.92941e-05	0.0684647	0.000133801	0.078948	0.000504361	0.0881251	0.00110969	0.589175
106	0.111628	0.604884	0.800337	885146914	2992059	0.114853	0.00336891	0.0580077	1.21618e-05	0.0685512	9.74625e-05	0.0793145	0.000412691	0.0890123	0.000998881	0.594038
107	0.111761	0.604304	0.799658	882112570	3034344	0.117887	0.00342807	0.0580142	7.37035e-06	0.0686126	6.92813e-05	0.0796064	0.00032978	0.0897955	0.000884819	0.598758
108	0.111897	0.603712	0.799506	879037337	3075233	0.120963	0.00348621	0.058018	4.28804e-06	0.0686548	4.79354e-05	0.0798333	0.000257213	0.0904746	0.000769861	0.603214
109	0.112034	0.60311	0.798928	875919162	3118175	0.124081	0.00354726	0.0580201	2.37666e-06	0.0686832	3.22446e-05	0.0800056	0.000195986	0.0910526	0.00065752	0.608085
110	0.112174	0.602497	0.798679	872757162	3162000	0.127243	0.00360992	0.0580212	1.26347e-06	0.0687016	2.10458e-05	0.0801334	0.000145949	0.0915345	0.000550152	0.61314
111	0.112316	0.601874	0.797974	869555780	3201382	0.130444	0.00366812	0.0580217	6.23581e-07	0.0687132	1.32419e-05	0.0802261	0.000106119	0.0919266	0.000449345	0.617353
112	0.112461	0.601239	0.79763	866310193	3245587	0.13369	0.00373247	0.058022	2.98597e-07	0.0687202	8.0248e-06	0.0802916	7.54331e-05	0.0922389	0.000359063	0.622513
113	0.112607	0.600593	0.79741	863022810	3287383	0.136977	0.0037947	0.0580221	1.13841e-07	0.0687242	4.66747e-06	0.0803368	5.21771e-05	0.0924814	0.000279973	0.627233
114	0.112757	0.599935	0.797015	859691827	3330983	0.140308	0.00385967	0.0580221	3.85967e-08	0.0687264	2.58598e-06	0.0803671	3.50844e-05	0.0926654	0.000213247	0.632318
115	0.112908	0.599264	0.796704	856316268	3375559	0.143684	0.00392648	0.0580221	0	0.0687276	1.37427e-06	0.0803868	2.28914e-05	0.0928019	0.000158747	0.637612
116	0.113062	0.598584	0.79586	852899606	3416662	0.1471	0.00398995	0.0580221	0	0.0687282	6.78292e-07	0.0803991	1.44037e-05	0.0929008	0.000115429	0.642277
117	0.113219	0.59789	0.795613	849439513	3460093	0.15056	0.00405686	0.0580221	0	0.0687285	3.24549e-07	0.0804066	8.72225e-06	0.0929707	8.19891e-05	0.647409
118	0.113377	0.597184	0.795411	845938996	3500517	0.154061	0.00412097	0.0580221	0	0.0687286	1.23629e-07	0.0804109	5.0688e-06	0.0930188	5.66634e-05	0.652011
119	0.113538	0.596468	0.794434	842395840	3543156	0.157604	0.00418843	0.0580221	0	0.0687286	4.18843e-08	0.0804133	2.80625e-06	0.093051	3.80728e-05	0.65706
120	0.113702	0.595738	0.794345	838809591	3586249	0.16119	0.0042572	0.0580221	0	0.0687286	0	0.0804145	1.49002e-06	0.0930719	2.48195e-05	0.662228
