# Supplementary material for: Quantifying the Potential for Future Gene Therapy to Lower Lifetime Risk of Polygenic Late-Onset Diseases
Source: MDPI journal article supplement (doi:10.3390/ijms20133352), 2019-07-08
Supplement: s2 [file s2 › SuppFiles/Results/LODsRareMedium/BreastCancer/-1.000/IndividualsByBetaDistrib.csv]

nEntry	Beta	nDetrimentalCount	nFractionPopulation	nCumulativeFractionPopulation	nEditsNeeded	nIndividuals
0	-19.8	0	0	1	0	0
1	-19.6	0	0	1	0	0
2	-19.4	0	0	1	0	0
3	-19.2	0	0	1	0	0
4	-19	0	0	1	0	0
5	-18.8	0	0	1	0	0
6	-18.6	0	0	1	0	0
7	-18.4	0	0	1	0	0
8	-18.2	0	0	1	0	0
9	-18	0	0	1	0	0
10	-17.8	0	0	1	0	0
11	-17.6	0	0	1	0	0
12	-17.4	0	0	1	0	0
13	-17.2	0	0	1	0	0
14	-17	0	0	1	0	0
15	-16.8	0	0	1	0	0
16	-16.6	0	0	1	0	0
17	-16.4	0	0	1	0	0
18	-16.2	0	0	1	0	0
19	-16	0	0	1	0	0
20	-15.8	0	0	1	0	0
21	-15.6	0	0	1	0	0
22	-15.4	0	0	1	0	0
23	-15.2	0	0	1	0	0
24	-15	0	0	1	0	0
25	-14.8	0	0	1	0	0
26	-14.6	0	0	1	0	0
27	-14.4	0	0	1	0	0
28	-14.2	0	0	1	0	0
29	-14	0	0	1	0	0
30	-13.8	0	0	1	0	0
31	-13.6	0	0	1	0	0
32	-13.4	0	0	1	0	0
33	-13.2	0	0	1	0	0
34	-13	0	0	1	0	0
35	-12.8	0	0	1	0	0
36	-12.6	0	0	1	0	0
37	-12.4	0	0	1	0	0
38	-12.2	0	0	1	0	0
39	-12	0	0	1	0	0
40	-11.8	0	0	1	0	0
41	-11.6	0	0	1	0	0
42	-11.4	0	0	1	0	0
43	-11.2	0	0	1	0	0
44	-11	0	0	1	0	0
45	-10.8	0	0	1	0	0
46	-10.6	0	0	1	0	0
47	-10.4	0	0	1	0	0
48	-10.2	0	0	1	0	0
49	-10	0	0	1	0	0
50	-9.8	0	0	1	0	0
51	-9.6	0	0	1	0	0
52	-9.4	0	0	1	0	0
53	-9.2	0	0	1	0	0
54	-9	0	0	1	0	0
55	-8.8	0	0	1	0	0
56	-8.6	0	0	1	0	0
57	-8.4	0	0	1	0	0
58	-8.2	0	0	1	0	0
59	-8	0	0	1	0	0
60	-7.8	0	0	1	0	0
61	-7.6	0	0	1	0	0
62	-7.4	0	0	1	0	0
63	-7.2	0	0	1	0	0
64	-7	0	0	1	0	0
65	-6.8	0	0	1	0	0
66	-6.6	0	0	1	0	0
67	-6.4	0	0	1	0	0
68	-6.2	0	0	1	0	0
69	-6	0	0	1	0	0
70	-5.8	0	0	1	0	0
71	-5.6	0	0	1	0	0
72	-5.4	0	0	1	0	0
73	-5.2	0	0	1	0	0
74	-5	0	0	1	0	0
75	-4.8	0	0	1	0	0
76	-4.6	0	0	1	0	0
77	-4.4	0	0	1	0	0
78	-4.2	0	0	1	0	0
79	-4	0	0	1	0	0
80	-3.8	0	0	1	0	0
81	-3.6	0	0	1	0	0
82	-3.4	0	0	1	0	0
83	-3.2	0	0	1	0	0
84	-3	0	0	1	0	0
85	-2.8	0	0.0026305	1	0	2630500
86	-2.6	1	0.003250413	0.9973695	0	3250413
87	-2.4	1.2239	0.008372531	0.99411909	0	8372531
88	-2.2	1.6587	0.017067533	0.98574656	0	17067533
89	-2	2.1614	0.014347038	0.96867902	0	14347038
90	-1.8	2.5301	0.02747183	0.95433199	0	27471830
91	-1.6	2.9111	0.040117214	0.92686015	0	40117214
92	-1.4	3.306	0.036785876	0.88674294	0	36785876
93	-1.2	3.6992	0.052537274	0.84995707	0	52537274
94	-1	4.0327	0.063012135	0.79741979	0	63012135
95	-0.8	4.4415	0.057071323	0.73440766	0	57071323
96	-0.6	4.8461	0.067868311	0.67733633	0	67868311
97	-0.4	5.1299	0.070931114	0.60946802	0	70931114
98	-0.2	5.5654	0.064243101	0.53853691	0	64243101
99	0	5.969	0.06747176	0.47429381	0	67471760
100	0.2	6.2665	0.063326571	0.40682205	0.29751	63326571
101	0.4	6.6745	0.055168161	0.34349548	0.7055	55168161
102	0.6	7.1005	0.049786371	0.28832731	1.1315	49786371
103	0.8	7.3615	0.045879011	0.23854094	1.3925	45879011
104	1	7.7605	0.037695391	0.19266193	1.7915	37695391
105	1.2	8.1386	0.032654944	0.15496654	2.1696	32654944
106	1.4	8.4529	0.027193237	0.1223116	2.4839	27193237
107	1.6	8.8498	0.021894555	0.095118361	2.8808	21894555
108	1.8	9.2205	0.018033404	0.073223806	3.2515	18033404
109	2	9.5427	0.014113938	0.055190402	3.5737	14113938
110	2.2	9.9305	0.010698295	0.041076464	3.9615	10698295
111	2.4	10.302	0.00831526	0.030378169	4.3326	8315260
112	2.6	10.635	0.006200362	0.022062909	4.6659	6200362
113	2.8	11.004	0.004560512	0.015862547	5.0348	4560512
114	3	11.362	0.003369213	0.011302035	5.3928	3369213
115	3.2	11.692	0.002418171	0.007932822	5.7227	2418171
116	3.4	12.066	0.001727554	0.005514651	6.097	1727554
117	3.6	12.421	0.001229966	0.003787097	6.4524	1229966
118	3.8	12.761	0.000850966	0.002557131	6.7918	850966
119	4	13.13	0.000576423	0.001706165	7.1612	576423
120	4.2	13.497	0.000390845	0.001129742	7.5277	390845
121	4.4	13.835	0.000260624	0.000738897	7.8662	260624
122	4.6	14.204	0.000170842	0.000478273	8.2347	170842
123	4.8	14.543	0.00011166	0.000307431	8.5741	111660
124	5	14.886	7.3134e-05	0.000195771	8.9171	73134
125	5.2	15.254	4.6762e-05	0.000122637	9.2855	46762
126	5.4	15.603	2.9163e-05	7.5875e-05	9.6337	29163
127	5.6	15.961	1.8071e-05	4.6712e-05	9.9922	18071
128	5.8	16.318	1.1319e-05	2.8641e-05	10.349	11319
129	6	16.69	7.085e-06	1.7322e-05	10.721	7085
130	6.2	16.992	4.176e-06	1.0237e-05	11.023	4176
131	6.4	17.344	2.483e-06	6.061e-06	11.375	2483
132	6.6	17.706	1.49e-06	3.578e-06	11.737	1490
133	6.8	18.058	8.78e-07	2.088e-06	12.089	878
134	7	18.451	4.79e-07	1.21e-06	12.482	479
135	7.2	18.835	3.1e-07	7.31e-07	12.866	310
136	7.4	19.011	1.76e-07	4.21e-07	13.042	176
137	7.6	19.394	9.9e-08	2.45e-07	13.425	99
138	7.8	19.897	5.8e-08	1.46e-07	13.928	58
139	8	20.372	4.3e-08	8.8e-08	14.403	43
140	8.2	20.667	1.8e-08	4.5e-08	14.698	18
141	8.4	21.1	1e-08	2.7e-08	15.131	10
142	8.6	21.625	8e-09	1.7e-08	15.656	8
143	8.8	21.667	3e-09	9e-09	15.698	3
144	9	22	4e-09	6e-09	16.031	4
145	9.2	21	1e-09	2e-09	15.031	1
146	9.4	0	0	1e-09	0	0
147	9.6	0	0	1e-09	0	0
148	9.8	0	0	1e-09	0	0
149	10	22	1e-09	1e-09	16.031	1
150	10.2	0	0	0	0	0
151	10.4	0	0	0	0	0
152	10.6	0	0	0	0	0
153	10.8	0	0	0	0	0
154	11	0	0	0	0	0
155	11.2	0	0	0	0	0
156	11.4	0	0	0	0	0
157	11.6	0	0	0	0	0
158	11.8	0	0	0	0	0
159	12	0	0	0	0	0
160	12.2	0	0	0	0	0
161	12.4	0	0	0	0	0
162	12.6	0	0	0	0	0
163	12.8	0	0	0	0	0
164	13	0	0	0	0	0
165	13.2	0	0	0	0	0
166	13.4	0	0	0	0	0
167	13.6	0	0	0	0	0
168	13.8	0	0	0	0	0
169	14	0	0	0	0	0
170	14.2	0	0	0	0	0
171	14.4	0	0	0	0	0
172	14.6	0	0	0	0	0
173	14.8	0	0	0	0	0
174	15	0	0	0	0	0
175	15.2	0	0	0	0	0
176	15.4	0	0	0	0	0
177	15.6	0	0	0	0	0
178	15.8	0	0	0	0	0
179	16	0	0	0	0	0
180	16.2	0	0	0	0	0
181	16.4	0	0	0	0	0
182	16.6	0	0	0	0	0
183	16.8	0	0	0	0	0
184	17	0	0	0	0	0
185	17.2	0	0	0	0	0
186	17.4	0	0	0	0	0
187	17.6	0	0	0	0	0
188	17.8	0	0	0	0	0
189	18	0	0	0	0	0
190	18.2	0	0	0	0	0
191	18.4	0	0	0	0	0
192	18.6	0	0	0	0	0
193	18.8	0	0	0	0	0
194	19	0	0	0	0	0
195	19.2	0	0	0	0	0
196	19.4	0	0	0	0	0
197	19.6	0	0	0	0	0
198	19.8	0	0	0	0	0
199	20	0	0	0	0	0
