# Supplementary material for: Quantifying the Potential for Future Gene Therapy to Lower Lifetime Risk of Polygenic Late-Onset Diseases
Source: MDPI journal article supplement (doi:10.3390/ijms20133352), 2019-07-08
Supplement: s2 [file s2 › SuppFiles/Results/LODsRareMedium/BreastCancer/0.250/FrailtyAnalysis.csv]

Age	Heritability	MeanOR	CaseOR	nControls	nCases	nCumIncidence	nIncidence	nLifeIncidence0	nAbsIncidence0	nLifeIncidence5	nAbsIncidence5	nLifeIncidence10	nAbsIncidence10	nLifeIncidence15	nAbsIncidence15	nIncActDivExp
26	0.295973	0.250015	1.50863	999996958	3042	3.042e-06	3.042e-06	3.00942e-06	3.00942e-06	3.01602e-06	3.01602e-06	3.02007e-06	3.02007e-06	3.02174e-06	3.02174e-06	0.250292
27	0.295966	0.25001	1.4583	999984790	12168	1.521e-05	1.2168e-05	1.50408e-05	1.20314e-05	1.50756e-05	1.20596e-05	1.5098e-05	1.2078e-05	1.51076e-05	1.20859e-05	0.249595
28	0.295953	0.25	1.49964	999962684	22106	3.7316e-05	2.21063e-05	3.68864e-05	2.18456e-05	3.69758e-05	2.19002e-05	3.70354e-05	2.19373e-05	3.70626e-05	2.1955e-05	0.250916
29	0.295933	0.249985	1.45936	999929735	32949	7.0265e-05	3.29502e-05	6.94284e-05	3.25421e-05	6.96035e-05	3.26277e-05	6.97241e-05	3.26887e-05	6.97833e-05	3.27207e-05	0.252657
30	0.295908	0.249966	1.4576	999885966	43769	0.000114034	4.37721e-05	0.000112631	4.32022e-05	0.000112925	4.33217e-05	0.000113134	4.34101e-05	0.000113243	4.346e-05	0.248831
31	0.295874	0.249941	1.46213	999829795	56171	0.000170205	5.61774e-05	0.000168038	5.54076e-05	0.000168495	5.55694e-05	0.000168825	5.56913e-05	0.000169009	5.5766e-05	0.249865
32	0.295833	0.24991	1.46203	999760211	69584	0.000239789	6.95958e-05	0.000236631	6.85924e-05	0.000237297	6.88026e-05	0.000237789	6.8964e-05	0.000238078	6.90691e-05	0.250857
33	0.295784	0.249873	1.4458	999675858	84353	0.000324142	8.43732e-05	0.000319723	8.30919e-05	0.000320657	8.33593e-05	0.000321357	8.35677e-05	0.000321788	8.37094e-05	0.252621
34	0.295725	0.249829	1.45575	999576072	99786	0.000423928	9.98184e-05	0.000417943	9.82204e-05	0.00041921	9.85536e-05	0.00042017	9.88131e-05	0.000420785	9.89977e-05	0.252829
35	0.295657	0.249778	1.44608	999459652	116420	0.000540348	0.000116469	0.000532443	0.0001145	0.000534123	0.000114912	0.0005354	0.00011523	0.000536251	0.000115465	0.253086
36	0.295578	0.249719	1.45079	999325226	134426	0.000674774	0.000134499	0.000664538	0.000132095	0.000666722	0.000132599	0.000668387	0.000132986	0.000669529	0.000133278	0.253527
37	0.295488	0.249651	1.44484	999170051	155175	0.000829949	0.00015528	0.000816881	0.000152343	0.000819685	0.000152964	0.000821819	0.000153432	0.000823321	0.000153792	0.25619
38	0.295387	0.249574	1.43118	998993835	176216	0.00100617	0.000176362	0.000989707	0.000172826	0.000993267	0.000173582	0.000995959	0.00017414	0.000997897	0.000174575	0.256563
39	0.295272	0.249487	1.43654	998795274	198561	0.00120473	0.000198761	0.00118424	0.00019453	0.00118871	0.000195446	0.00119207	0.000196109	0.00119452	0.000196625	0.256528
40	0.295144	0.24939	1.42749	998571672	223602	0.00142833	0.000223872	0.00140305	0.000218808	0.00140863	0.000219915	0.00141277	0.000220706	0.00141584	0.000221317	0.25768
41	0.295001	0.249281	1.42054	998320699	250973	0.0016793	0.000251332	0.00164833	0.000245288	0.00165525	0.000246621	0.00166034	0.000247562	0.00166412	0.000248285	0.259143
42	0.294843	0.24916	1.41288	998041091	279608	0.00195891	0.000280078	0.00192124	0.000272909	0.00192975	0.000274505	0.00193596	0.000275624	0.00194059	0.000276468	0.259688
43	0.294668	0.249025	1.40164	997729485	311606	0.00227051	0.000312218	0.00222494	0.000303701	0.00223536	0.000305611	0.00224291	0.000306947	0.00224853	0.000307935	0.261191
44	0.294476	0.248877	1.39377	997383191	346294	0.00261681	0.000347082	0.00256192	0.000336982	0.00257463	0.000339264	0.00258377	0.000340861	0.00259054	0.000342017	0.262744
45	0.294265	0.248713	1.38618	997000350	382841	0.00299965	0.000383845	0.00293384	0.000371915	0.00294926	0.000374633	0.0029603	0.000376528	0.00296843	0.000377883	0.263616
46	0.294035	0.248532	1.37323	996577162	423188	0.00342284	0.000424461	0.00334419	0.000410348	0.00336286	0.000413603	0.00337615	0.00041585	0.00338586	0.000417437	0.265068
47	0.293783	0.248334	1.36349	996110129	467033	0.00388987	0.000468637	0.00379614	0.000451953	0.00381871	0.000455843	0.00383466	0.00045851	0.00384624	0.000460378	0.266649
48	0.293509	0.248117	1.34847	995596411	513718	0.00440359	0.000515724	0.00429218	0.000496041	0.00431939	0.000500685	0.00433849	0.000503834	0.00435228	0.000506038	0.267847
49	0.293208	0.247879	1.34209	995030498	565913	0.0049695	0.000568416	0.00483731	0.000545127	0.00487009	0.000550696	0.00489291	0.000554425	0.00490931	0.000557034	0.269902
50	0.292884	0.24762	1.3284	994411203	619295	0.0055888	0.000622388	0.00543228	0.000594969	0.00547171	0.00060162	0.00549893	0.000606017	0.0055184	0.000609083	0.270584
51	0.292532	0.247338	1.31115	993730569	680634	0.00626943	0.000684459	0.00608428	0.000652007	0.00613169	0.000659984	0.00616415	0.000665218	0.00618723	0.000668832	0.272809
52	0.292149	0.247029	1.3034	992984654	745915	0.00701535	0.000750621	0.00679654	0.000712259	0.00685352	0.000721829	0.00689219	0.000728043	0.00691953	0.000732302	0.27461
53	0.291758	0.246712	1.29255	992214521	770133	0.00778548	0.000775574	0.00752936	0.00073282	0.00759715	0.000743633	0.00764279	0.000750595	0.00767485	0.000755316	0.276605
54	0.291363	0.246389	1.2794	991425297	789224	0.0085747	0.000795417	0.0082775	0.000748137	0.00835739	0.000760236	0.00841079	0.000768002	0.00844805	0.000773203	0.278312
55	0.290959	0.246059	1.27365	990616623	808674	0.00938338	0.000815668	0.00904093	0.000763429	0.0091343	0.000776909	0.00919638	0.000785594	0.00923938	0.000791336	0.280096
56	0.290552	0.245723	1.25586	989787663	828960	0.0102123	0.000836812	0.00982004	0.000779115	0.00992839	0.000794094	0.0100002	0.000803809	0.0100496	0.000810184	0.282116
57	0.29014	0.245382	1.24268	988941564	846099	0.0110584	0.000854829	0.0106115	0.000791433	0.0107363	0.000807923	0.010819	0.000818778	0.0108754	0.000825826	0.283028
58	0.289721	0.245035	1.23509	988074465	867099	0.0119255	0.000876795	0.0114184	0.000806896	0.0115614	0.000825088	0.0116562	0.000837262	0.0117205	0.000845101	0.285192
59	0.289298	0.244682	1.22223	987188950	885515	0.012811	0.000896203	0.0122378	0.000819473	0.0124008	0.000839415	0.0125092	0.00085299	0.0125822	0.000861704	0.286464
60	0.28887	0.244322	1.21117	986282032	906918	0.013718	0.000918687	0.0130722	0.000834337	0.013257	0.000856176	0.0133805	0.000871294	0.0134632	0.000881035	0.288659
61	0.288437	0.243957	1.19848	985355268	926764	0.0146447	0.000939654	0.0139194	0.000847248	0.014128	0.000871038	0.0142683	0.000887784	0.0143619	0.000898646	0.290312
62	0.287999	0.243587	1.18931	984411193	944075	0.0155888	0.000958106	0.0147767	0.000857305	0.0150111	0.000883078	0.0151698	0.000901478	0.0152755	0.000913591	0.291147
63	0.287557	0.243211	1.17682	983447459	963734	0.0165525	0.000978995	0.0156456	0.000868874	0.0159079	0.000896822	0.0160868	0.000917041	0.016206	0.000930572	0.292683
64	0.28711	0.242829	1.16844	982464831	982628	0.0175352	0.000999167	0.0165247	0.000879069	0.0168173	0.000909344	0.0170183	0.000931472	0.0171526	0.000946536	0.293959
65	0.286658	0.242443	1.15637	981462414	1002417	0.0185376	0.00102031	0.017414	0.000889294	0.0177395	0.000922194	0.0179646	0.000946332	0.0181156	0.000963042	0.295476
66	0.286202	0.24205	1.14697	980439008	1023406	0.019561	0.00104274	0.0183137	0.000899717	0.0186751	0.000935598	0.0189265	0.000961869	0.019096	0.000980362	0.297313
67	0.285741	0.241652	1.13581	979396577	1042431	0.0206034	0.00106323	0.0192211	0.000907426	0.0196217	0.000946621	0.0199016	0.00097508	0.0200914	0.000995397	0.298551
68	0.285277	0.241249	1.12364	978334028	1062549	0.021666	0.0010849	0.0201361	0.000915003	0.0205797	0.000957962	0.0208904	0.000988776	0.0211024	0.00101107	0.300078
69	0.284807	0.24084	1.11626	977251506	1082522	0.0227485	0.0011065	0.0210574	0.000921248	0.0215481	0.000968435	0.0218921	0.00100179	0.0221286	0.00102617	0.301538
70	0.284332	0.240424	1.10829	976146826	1104680	0.0238532	0.00113039	0.0219854	0.000927997	0.0225281	0.000980017	0.0229084	0.00101627	0.0231715	0.00104287	0.303576
71	0.283853	0.240004	1.09685	975023524	1123302	0.0249765	0.00115075	0.0229157	0.000930296	0.0235156	0.00098754	0.0239353	0.00102692	0.0242272	0.00105576	0.304617
72	0.283369	0.239578	1.08896	973880116	1143408	0.0261199	0.0011727	0.0238478	0.000932163	0.024511	0.000995325	0.0249737	0.00103832	0.0252968	0.00106953	0.306044
73	0.282881	0.239147	1.07763	972714512	1165604	0.0272855	0.00119687	0.0247817	0.000933847	0.0255147	0.00100375	0.0260245	0.00105087	0.0263815	0.00108468	0.308002
74	0.28239	0.238711	1.06819	971530242	1184270	0.0284698	0.00121749	0.0257124	0.00093073	0.0265226	0.00100784	0.027084	0.00105946	0.0274774	0.00109595	0.309008
75	0.281893	0.238269	1.05921	970323577	1206665	0.0296764	0.00124203	0.0266409	0.000928493	0.0275362	0.00101367	0.0281545	0.00107049	0.0285875	0.0011101	0.310965
76	0.281392	0.237822	1.05194	969098833	1224744	0.0309012	0.0012622	0.0275617	0.000920787	0.0285505	0.00101431	0.0292312	0.00107672	0.0297072	0.00111966	0.311793
77	0.280889	0.237371	1.03943	967852628	1246205	0.0321474	0.00128594	0.0284749	0.000913219	0.0295665	0.00101597	0.030316	0.00108481	0.0308388	0.00113167	0.313469
78	0.28038	0.236914	1.03294	966584668	1267960	0.0334153	0.00131008	0.029378	0.000903105	0.0305824	0.00101585	0.0314079	0.00109189	0.031982	0.00114315	0.315195
79	0.279868	0.236452	1.02195	965296755	1287913	0.0347032	0.00133244	0.0302668	0.000888763	0.0315945	0.00101218	0.0325039	0.00109604	0.0331342	0.00115218	0.316456
80	0.279351	0.235985	1.01472	963987876	1308879	0.0360121	0.00135593	0.0311388	0.000871988	0.0326017	0.00100714	0.0336035	0.00109954	0.0342953	0.00116117	0.317951
81	0.278834	0.235515	1.00327	962660648	1327228	0.0373394	0.00137681	0.031989	0.000850209	0.0335995	0.000997837	0.0347027	0.00109918	0.0354621	0.00116682	0.318802
82	0.27831	0.235039	0.99774	961313658	1346990	0.0386863	0.00139924	0.0328147	0.000825759	0.0345866	0.000987074	0.0358008	0.00109813	0.0366347	0.00117254	0.319986
83	0.277783	0.234558	0.98759	959943644	1370014	0.0400564	0.00142515	0.0336141	0.000799403	0.0355624	0.000975792	0.0368984	0.00109761	0.0378145	0.00117977	0.321929
84	0.277253	0.234072	0.981076	958555850	1387794	0.0414441	0.0014457	0.0343804	0.000766243	0.0365201	0.000957689	0.0379891	0.00109068	0.0389955	0.00118104	0.32263
85	0.276722	0.233583	0.96846	957146431	1409419	0.0428536	0.00147036	0.035112	0.000731672	0.037459	0.000938969	0.0390736	0.00108451	0.0401795	0.001184	0.324217
86	0.276184	0.233088	0.963194	955714757	1431674	0.0442852	0.00149577	0.0358059	0.000693889	0.0383762	0.000917116	0.04015	0.00107636	0.0413652	0.00118568	0.325933
87	0.275643	0.232588	0.952676	954260372	1454385	0.0457396	0.00152178	0.0364588	0.000652859	0.0392678	0.000891596	0.0412157	0.00106577	0.0425509	0.00118569	0.327736
88	0.2751	0.232084	0.946712	952788214	1472158	0.0472118	0.00154272	0.0370652	0.000606397	0.0401268	0.000859004	0.0422643	0.00104854	0.0437303	0.00117945	0.32842
89	0.274553	0.231576	0.93775	951294693	1493521	0.0487053	0.00156753	0.0376237	0.000558487	0.0409514	0.000824618	0.0432949	0.00103065	0.0449041	0.00117377	0.329901
90	0.274004	0.231064	0.929534	949782669	1512024	0.0502173	0.00158944	0.0381307	0.000506997	0.0417363	0.000784937	0.0443022	0.00100733	0.0460676	0.00116346	0.330747
91	0.273451	0.230548	0.920606	948248101	1534568	0.0517519	0.0016157	0.0385857	0.000454999	0.0424801	0.000743759	0.0452853	0.000983029	0.0472213	0.00115372	0.33247
92	0.272897	0.230028	0.913453	946694451	1553650	0.0533055	0.00163844	0.0389867	0.000401013	0.0431775	0.000697418	0.0462377	0.00095245	0.0483598	0.00113851	0.333437
93	0.272338	0.229503	0.905916	945119230	1575221	0.0548808	0.00166392	0.0393345	0.000347856	0.0438263	0.000648849	0.0471569	0.000919141	0.0494817	0.00112195	0.334934
94	0.271775	0.228973	0.898379	943522332	1596898	0.0564777	0.00168963	0.0396305	0.000296001	0.0444235	0.000597144	0.0480386	0.000881695	0.0505837	0.00110199	0.336445
95	0.271211	0.228441	0.889646	941906544	1615788	0.0580935	0.00171251	0.0398768	0.000246246	0.0449653	0.00054179	0.0488774	0.000838804	0.0516602	0.00107645	0.337367
96	0.270644	0.227904	0.882727	940268950	1637594	0.0597311	0.00173859	0.0400774	0.000200605	0.0454508	0.000485547	0.0496711	0.000793693	0.0527092	0.00104903	0.338894
97	0.270073	0.227362	0.876181	938611230	1657720	0.0613888	0.00176303	0.0402369	0.000159473	0.0458787	0.000427874	0.0504152	0.000744134	0.0537255	0.00101625	0.34007
98	0.269502	0.226818	0.86681	936933242	1677988	0.0630668	0.00178773	0.0403607	0.000123802	0.0462492	0.00037055	0.0511064	0.00069118	0.0547046	0.000979106	0.341275
99	0.268925	0.226269	0.862132	935234734	1698508	0.0647653	0.00181284	0.0404545	9.38426e-05	0.0465641	0.000314835	0.0517415	0.00063514	0.0556424	0.000937797	0.34253
100	0.268348	0.225717	0.852629	933516077	1718657	0.0664839	0.00183767	0.040524	6.94853e-05	0.046826	0.000261923	0.0523178	0.000576283	0.0565346	0.000892206	0.343709
101	0.267769	0.225161	0.845396	931776165	1739912	0.0682238	0.00186383	0.0405743	5.03357e-05	0.0470391	0.000213139	0.0528337	0.000515884	0.0573778	0.000843283	0.345108
102	0.267185	0.224601	0.83995	930017776	1758389	0.0699822	0.00188714	0.0406099	3.5537e-05	0.0472083	0.000169157	0.0532875	0.000453858	0.0581672	0.000789323	0.345959
103	0.2666	0.224038	0.831911	928237218	1780558	0.0717628	0.00191454	0.0406343	2.44827e-05	0.0473397	0.00013137	0.0536807	0.000393201	0.0589006	0.00073343	0.347536
104	0.26601	0.223469	0.825099	926430934	1806284	0.0735691	0.00194593	0.0406508	1.64191e-05	0.0474395	9.97972e-05	0.0540156	0.000334813	0.059576	0.000675442	0.349799
105	0.265421	0.222899	0.817426	924609057	1821877	0.0753909	0.00196655	0.0406614	1.06215e-05	0.0475131	7.36585e-05	0.0542932	0.000277654	0.0601869	0.000610894	0.350101
106	0.264827	0.222325	0.811482	922768384	1840673	0.0772316	0.00199076	0.040668	6.64483e-06	0.0475664	5.32507e-05	0.0545187	0.000225482	0.0607327	0.00054576	0.351029
107	0.264233	0.221747	0.803728	920903620	1864764	0.0790964	0.00202084	0.040672	4.00924e-06	0.0476041	3.76869e-05	0.0546981	0.00017939	0.061214	0.000481314	0.352966
108	0.263637	0.221167	0.796158	919020170	1883450	0.0809798	0.00204522	0.0406744	2.31664e-06	0.04763	2.58974e-05	0.054837	0.000138961	0.0616299	0.000415922	0.353881
109	0.263036	0.220583	0.791598	917117610	1902560	0.0828824	0.0020702	0.0406756	1.27472e-06	0.0476473	1.72943e-05	0.0549422	0.000105116	0.0619826	0.000352659	0.354882
110	0.262436	0.219995	0.783266	915192505	1925105	0.0848075	0.00209908	0.0406763	6.73787e-07	0.0476585	1.12234e-05	0.05502	7.7832e-05	0.062276	0.000293386	0.356526
111	0.261832	0.219405	0.777919	913249440	1943065	0.0867506	0.00212312	0.0406766	3.30321e-07	0.0476655	7.01446e-06	0.0550762	5.62129e-05	0.062514	0.000238025	0.357326
112	0.261226	0.218811	0.771365	911285504	1963936	0.0887145	0.00215049	0.0406768	1.57115e-07	0.0476697	4.22246e-06	0.0551159	3.96911e-05	0.0627029	0.000188931	0.358666
113	0.260619	0.218215	0.763697	909301354	1984150	0.0906986	0.00217731	0.0406769	5.95245e-08	0.0476722	2.4405e-06	0.0551432	2.72821e-05	0.0628493	0.000146391	0.359892
114	0.26001	0.217615	0.758034	907295882	2005472	0.0927041	0.00220551	0.0406769	2.00547e-08	0.0476735	1.34367e-06	0.0551614	1.82297e-05	0.0629601	0.000110802	0.361322
115	0.259398	0.217013	0.751296	905269890	2025992	0.0947301	0.002233	0.0406769	0	0.0476742	7.09097e-07	0.0551732	1.18115e-05	0.063042	8.19109e-05	0.362612
116	0.258786	0.216408	0.744996	903227030	2042860	0.096773	0.00225663	0.0406769	0	0.0476746	3.47286e-07	0.0551806	7.37472e-06	0.0631011	5.90999e-05	0.363258
117	0.258172	0.215801	0.738452	901163089	2063941	0.0988369	0.00228507	0.0406769	0	0.0476747	1.65115e-07	0.055185	4.43747e-06	0.0631428	4.17122e-05	0.364661
118	0.257555	0.21519	0.732892	899078140	2084949	0.100922	0.00231362	0.0406769	0	0.0476748	6.25485e-08	0.0551876	2.56449e-06	0.0631715	2.8668e-05	0.366056
119	0.256935	0.214576	0.727367	896972991	2105149	0.103027	0.00234145	0.0406769	0	0.0476748	2.10515e-08	0.055189	1.41045e-06	0.0631906	1.91358e-05	0.367316
120	0.256314	0.213959	0.720769	894848050	2124941	0.105152	0.00236901	0.0406769	0	0.0476748	0	0.0551897	7.43729e-07	0.063203	1.23884e-05	0.368512
