# Supplementary material for: Quantifying the Potential for Future Gene Therapy to Lower Lifetime Risk of Polygenic Late-Onset Diseases
Source: MDPI journal article supplement (doi:10.3390/ijms20133352), 2019-07-08
Supplement: s2 [file s2 › SuppFiles/Results/LODsRareMedium/BreastCancer/0.250/IndividualsByBetaDistrib.csv]

nEntry	Beta	nDetrimentalCount	nFractionPopulation	nCumulativeFractionPopulation	nEditsNeeded	nIndividuals
0	-19.8	0	0	1	0	0
1	-19.6	0	0	1	0	0
2	-19.4	0	0	1	0	0
3	-19.2	0	0	1	0	0
4	-19	0	0	1	0	0
5	-18.8	0	0	1	0	0
6	-18.6	0	0	1	0	0
7	-18.4	0	0	1	0	0
8	-18.2	0	0	1	0	0
9	-18	0	0	1	0	0
10	-17.8	0	0	1	0	0
11	-17.6	0	0	1	0	0
12	-17.4	0	0	1	0	0
13	-17.2	0	0	1	0	0
14	-17	0	0	1	0	0
15	-16.8	0	0	1	0	0
16	-16.6	0	0	1	0	0
17	-16.4	0	0	1	0	0
18	-16.2	0	0	1	0	0
19	-16	0	0	1	0	0
20	-15.8	0	0	1	0	0
21	-15.6	0	0	1	0	0
22	-15.4	0	0	1	0	0
23	-15.2	0	0	1	0	0
24	-15	0	0	1	0	0
25	-14.8	0	0	1	0	0
26	-14.6	0	0	1	0	0
27	-14.4	0	0	1	0	0
28	-14.2	0	0	1	0	0
29	-14	0	0	1	0	0
30	-13.8	0	0	1	0	0
31	-13.6	0	0	1	0	0
32	-13.4	0	0	1	0	0
33	-13.2	0	0	1	0	0
34	-13	0	0	1	0	0
35	-12.8	0	0	1	0	0
36	-12.6	0	0	1	0	0
37	-12.4	0	0	1	0	0
38	-12.2	0	0	1	0	0
39	-12	0	0	1	0	0
40	-11.8	0	0	1	0	0
41	-11.6	0	0	1	0	0
42	-11.4	0	0	1	0	0
43	-11.2	0	0	1	0	0
44	-11	0	0	1	0	0
45	-10.8	0	0	1	0	0
46	-10.6	0	0	1	0	0
47	-10.4	0	0	1	0	0
48	-10.2	0	0	1	0	0
49	-10	0	0	1	0	0
50	-9.8	0	0	1	0	0
51	-9.6	0	0	1	0	0
52	-9.4	0	0	1	0	0
53	-9.2	0	0	1	0	0
54	-9	0	0	1	0	0
55	-8.8	0	0	1	0	0
56	-8.6	0	0	1	0	0
57	-8.4	0	0	1	0	0
58	-8.2	0	0	1	0	0
59	-8	0	0	1	0	0
60	-7.8	0	0	1	0	0
61	-7.6	0	0	1	0	0
62	-7.4	0	0	1	0	0
63	-7.2	0	0	1	0	0
64	-7	0	0	1	0	0
65	-6.8	0	0	1	0	0
66	-6.6	0	0	1	0	0
67	-6.4	0	0	1	0	0
68	-6.2	0	0	1	0	0
69	-6	0	0	1	0	0
70	-5.8	0	0	1	0	0
71	-5.6	0	0	1	0	0
72	-5.4	0	0	1	0	0
73	-5.2	0	0	1	0	0
74	-5	0	0	1	0	0
75	-4.8	0	0	1	0	0
76	-4.6	0	0	1	0	0
77	-4.4	0	0	1	0	0
78	-4.2	0	0	1	0	0
79	-4	0	0	1	0	0
80	-3.8	0	0	1	0	0
81	-3.6	0	0	1	0	0
82	-3.4	0	0	1	0	0
83	-3.2	0	0	1	0	0
84	-3	0	0	1	0	0
85	-2.8	0	0.002629412	1	0	2629412
86	-2.6	1	0.003248464	0.99737059	0	3248464
87	-2.4	1.2239	0.008369818	0.99412212	0	8369818
88	-2.2	1.6586	0.01706379	0.98575231	0	17063790
89	-2	2.1614	0.014345604	0.96868852	0	14345604
90	-1.8	2.5303	0.027475326	0.95434291	0	27475326
91	-1.6	2.9111	0.04009869	0.92686759	0	40098690
92	-1.4	3.306	0.036779728	0.8867689	0	36779728
93	-1.2	3.6994	0.052546495	0.84998917	0	52546495
94	-1	4.0328	0.063021324	0.79744267	0	63021324
95	-0.8	4.4415	0.057075855	0.73442135	0	57075855
96	-0.6	4.8461	0.067859265	0.67734549	0	67859265
97	-0.4	5.1298	0.070922271	0.60948623	0	70922271
98	-0.2	5.5653	0.064255348	0.53856396	0	64255348
99	0	5.9689	0.067469115	0.47430861	0	67469115
100	0.2	6.2664	0.063315923	0.40683949	0.29757	63315923
101	0.4	6.6744	0.055164118	0.34352357	0.70553	55164118
102	0.6	7.1007	0.049783724	0.28835945	1.1318	49783724
103	0.8	7.3617	0.045896494	0.23857573	1.3928	45896494
104	1	7.7602	0.037703061	0.19267924	1.7913	37703061
105	1.2	8.1385	0.03265984	0.15497617	2.1697	32659840
106	1.4	8.4529	0.027189451	0.12231633	2.4841	27189451
107	1.6	8.8498	0.021890734	0.095126884	2.881	21890734
108	1.8	9.2208	0.018033822	0.07323615	3.2519	18033822
109	2	9.5424	0.014114355	0.055202328	3.5735	14114355
110	2.2	9.9304	0.010704771	0.041087973	3.9615	10704771
111	2.4	10.301	0.008318282	0.030383202	4.3325	8318282
112	2.6	10.634	0.006202461	0.02206492	4.6656	6202461
113	2.8	11.004	0.004558888	0.015862459	5.0347	4558888
114	3	11.362	0.003372597	0.011303571	5.3927	3372597
115	3.2	11.691	0.002417582	0.007930974	5.7223	2417582
116	3.4	12.066	0.001726385	0.005513392	6.0975	1726385
117	3.6	12.424	0.001229648	0.003787007	6.4553	1229648
118	3.8	12.759	0.000851188	0.002557359	6.7898	851188
119	4	13.129	0.000575634	0.001706171	7.1602	575634
120	4.2	13.497	0.000391159	0.001130537	7.5283	391159
121	4.4	13.833	0.00026136	0.000739378	7.8645	261360
122	4.6	14.202	0.000170795	0.000478018	8.2332	170795
123	4.8	14.539	0.00011193	0.000307223	8.5701	111930
124	5	14.893	7.2423e-05	0.000195293	8.9246	72423
125	5.2	15.248	4.653e-05	0.00012287	9.2796	46530
126	5.4	15.605	2.9492e-05	7.634e-05	9.6358	29492
127	5.6	15.955	1.834e-05	4.6848e-05	9.9866	18340
128	5.8	16.306	1.1432e-05	2.8508e-05	10.337	11432
129	6	16.643	6.958e-06	1.7076e-05	10.674	6958
130	6.2	17.02	4.124e-06	1.0118e-05	11.052	4124
131	6.4	17.379	2.471e-06	5.994e-06	11.41	2471
132	6.6	17.688	1.501e-06	3.523e-06	11.719	1501
133	6.8	18.092	8.72e-07	2.022e-06	12.123	872
134	7	18.376	5.02e-07	1.15e-06	12.408	502
135	7.2	18.795	2.78e-07	6.48e-07	12.826	278
136	7.4	18.916	1.54e-07	3.7e-07	12.947	154
137	7.6	19.752	1.05e-07	2.16e-07	13.784	105
138	7.8	20.047	4.3e-08	1.11e-07	14.078	43
139	8	19.857	3.5e-08	6.8e-08	13.888	35
140	8.2	20.588	1.7e-08	3.3e-08	14.619	17
141	8.4	21	7e-09	1.6e-08	15.031	7
142	8.6	21.143	7e-09	9e-09	15.174	7
143	8.8	21	1e-09	2e-09	15.031	1
144	9	21	1e-09	1e-09	15.031	1
145	9.2	0	0	0	0	0
146	9.4	0	0	0	0	0
147	9.6	0	0	0	0	0
148	9.8	0	0	0	0	0
149	10	0	0	0	0	0
150	10.2	0	0	0	0	0
151	10.4	0	0	0	0	0
152	10.6	0	0	0	0	0
153	10.8	0	0	0	0	0
154	11	0	0	0	0	0
155	11.2	0	0	0	0	0
156	11.4	0	0	0	0	0
157	11.6	0	0	0	0	0
158	11.8	0	0	0	0	0
159	12	0	0	0	0	0
160	12.2	0	0	0	0	0
161	12.4	0	0	0	0	0
162	12.6	0	0	0	0	0
163	12.8	0	0	0	0	0
164	13	0	0	0	0	0
165	13.2	0	0	0	0	0
166	13.4	0	0	0	0	0
167	13.6	0	0	0	0	0
168	13.8	0	0	0	0	0
169	14	0	0	0	0	0
170	14.2	0	0	0	0	0
171	14.4	0	0	0	0	0
172	14.6	0	0	0	0	0
173	14.8	0	0	0	0	0
174	15	0	0	0	0	0
175	15.2	0	0	0	0	0
176	15.4	0	0	0	0	0
177	15.6	0	0	0	0	0
178	15.8	0	0	0	0	0
179	16	0	0	0	0	0
180	16.2	0	0	0	0	0
181	16.4	0	0	0	0	0
182	16.6	0	0	0	0	0
183	16.8	0	0	0	0	0
184	17	0	0	0	0	0
185	17.2	0	0	0	0	0
186	17.4	0	0	0	0	0
187	17.6	0	0	0	0	0
188	17.8	0	0	0	0	0
189	18	0	0	0	0	0
190	18.2	0	0	0	0	0
191	18.4	0	0	0	0	0
192	18.6	0	0	0	0	0
193	18.8	0	0	0	0	0
194	19	0	0	0	0	0
195	19.2	0	0	0	0	0
196	19.4	0	0	0	0	0
197	19.6	0	0	0	0	0
198	19.8	0	0	0	0	0
199	20	0	0	0	0	0
