# Supplementary material for: Quantifying the Potential for Future Gene Therapy to Lower Lifetime Risk of Polygenic Late-Onset Diseases
Source: MDPI journal article supplement (doi:10.3390/ijms20133352), 2019-07-08
Supplement: s2 [file s2 › SuppFiles/Results/LODsRareMedium/BreastCancer/1.000/FrailtyAnalysis.csv]

Age	Heritability	MeanOR	CaseOR	nControls	nCases	nCumIncidence	nIncidence	nLifeIncidence0	nAbsIncidence0	nLifeIncidence5	nAbsIncidence5	nLifeIncidence10	nAbsIncidence10	nLifeIncidence15	nAbsIncidence15	nIncActDivExp
26	0.295952	1.00001	5.97088	999987979	12021	1.2021e-05	1.2021e-05	1.18923e-05	1.18923e-05	1.19183e-05	1.19183e-05	1.19343e-05	1.19343e-05	1.19409e-05	1.19409e-05	0.989073
27	0.295923	0.999926	5.95186	999939231	48748	6.0769e-05	4.87486e-05	6.00928e-05	4.82011e-05	6.0232e-05	4.83142e-05	6.03216e-05	4.83878e-05	6.03599e-05	4.84195e-05	0.999947
28	0.295871	0.999771	5.83894	999851321	87910	0.000148679	8.79153e-05	0.000146967	8.68797e-05	0.000147324	8.70969e-05	0.000147561	8.72445e-05	0.000147669	8.73149e-05	0.997877
29	0.295794	0.999541	5.81258	999720453	130868	0.000279547	0.000130887	0.000276219	0.000129271	0.000276916	0.000129611	0.000277395	0.000129853	0.000277631	0.00012998	1.00362
30	0.295691	0.999232	5.81785	999544942	175511	0.000455058	0.00017556	0.000449457	0.000173287	0.000450633	0.000173766	0.000451467	0.00017412	0.000451902	0.000174321	0.998005
31	0.29556	0.998837	5.7878	999320252	224690	0.000679748	0.000224792	0.000671094	0.000221737	0.000672916	0.000222385	0.000674238	0.000222873	0.000674972	0.000223172	0.999828
32	0.2954	0.998353	5.74092	999043123	277129	0.000956877	0.000277318	0.000944274	0.000273366	0.000946933	0.000274203	0.000948898	0.000274847	0.000950051	0.000275265	0.999588
33	0.29521	0.997773	5.69006	998709645	333478	0.00129035	0.000333797	0.00127277	0.000328807	0.00127648	0.000329865	0.00127927	0.00033069	0.00128098	0.000331251	0.999421
34	0.294988	0.99709	5.65003	998315338	394307	0.00168466	0.000394816	0.00166089	0.000388622	0.00166592	0.00038994	0.00166973	0.000390967	0.00167218	0.000391697	1.00003
35	0.294732	0.9963	5.59087	997856582	458756	0.00214342	0.00045953	0.00211208	0.000451953	0.00211874	0.000453579	0.0021238	0.000454834	0.00212717	0.000455762	0.99855
36	0.294439	0.995391	5.56333	997327141	529441	0.00267286	0.000530578	0.00263234	0.000521378	0.00264098	0.000523368	0.00264757	0.000524896	0.00265209	0.000526047	1.00013
37	0.294111	0.994363	5.47827	996723715	603426	0.00327628	0.000605043	0.00322475	0.000594001	0.00323581	0.000596421	0.00324422	0.000598249	0.00325014	0.000599652	0.998237
38	0.293744	0.993205	5.42063	996039314	684401	0.00396069	0.000686651	0.00389598	0.00067344	0.00390998	0.000676385	0.00392056	0.000678562	0.00392817	0.000680258	0.998904
39	0.293336	0.991907	5.35653	995266970	772344	0.00473303	0.000775415	0.00465265	0.000759674	0.0046702	0.000763249	0.00468337	0.000765839	0.00469298	0.000767855	1.00078
40	0.292887	0.990469	5.28359	994404375	862595	0.00559562	0.000866697	0.00549675	0.000848115	0.00551857	0.000852405	0.00553479	0.000855473	0.00554676	0.000857839	0.997581
41	0.292393	0.988875	5.22046	993441906	962469	0.00655809	0.000967885	0.00643742	0.000945962	0.00646435	0.000951102	0.00648418	0.000954731	0.00649892	0.000957519	0.997966
42	0.291854	0.987117	5.14678	992371008	1070898	0.00762899	0.00107797	0.00748266	0.00105214	0.00751571	0.00105829	0.00753982	0.00106261	0.00755779	0.00106586	0.999487
43	0.291265	0.985185	5.07852	991185681	1185327	0.00881432	0.00119444	0.00863791	0.00116414	0.00867823	0.00117146	0.00870742	0.00117658	0.00872916	0.00118037	0.99923
44	0.290626	0.983068	5.00006	989874460	1311221	0.0101255	0.00132288	0.00991388	0.00128731	0.00996283	0.00129603	0.00999807	0.00130213	0.0100242	0.00130654	1.00143
45	0.289937	0.980765	4.91583	988434702	1439758	0.0115653	0.00145449	0.0113125	0.00141297	0.0113717	0.0014233	0.0114141	0.0014305	0.0114453	0.00143565	0.998907
46	0.289191	0.978254	4.84332	986850439	1584263	0.0131496	0.0016028	0.0128487	0.00155417	0.0129201	0.0015665	0.0129709	0.00157501	0.013008	0.00158102	1.00092
47	0.288392	0.975537	4.75751	985117899	1732540	0.0148821	0.00175563	0.0145253	0.00169894	0.0146111	0.00171356	0.0146718	0.00172359	0.0147159	0.00173061	0.998929
48	0.287535	0.972594	4.66663	983220348	1897551	0.0167797	0.00192622	0.0163576	0.00185994	0.0164605	0.00187735	0.0165328	0.00188916	0.0165851	0.00189742	1.0004
49	0.28662	0.969422	4.57914	981151638	2068710	0.0188484	0.00210401	0.0183503	0.00202673	0.0184736	0.00204744	0.0185596	0.0020613	0.0186213	0.002071	0.999053
50	0.285639	0.965996	4.49332	978891994	2259644	0.021108	0.00230305	0.0205212	0.00221259	0.0206688	0.00223732	0.0207708	0.00225368	0.0208437	0.00226508	1.00126
51	0.284598	0.962324	4.39908	976438953	2453041	0.023561	0.00250594	0.0228711	0.00240054	0.0230474	0.00242991	0.0231682	0.00244918	0.0232542	0.00246248	0.998806
52	0.283492	0.958382	4.30874	973772015	2666938	0.026228	0.00273129	0.0254177	0.00260805	0.0256282	0.0026431	0.0257713	0.00266585	0.0258725	0.00268144	0.999225
53	0.282379	0.954395	4.22962	971045805	2726210	0.0289542	0.00279964	0.0280118	0.002664	0.0282606	0.0027033	0.0284283	0.00272861	0.0285462	0.00274577	0.99848
54	0.281268	0.950385	4.15166	968272550	2773255	0.0317274	0.00285595	0.0306407	0.00270727	0.030932	0.00275105	0.031127	0.00277915	0.0312632	0.00279797	0.999282
55	0.280159	0.946357	4.07057	965453288	2819262	0.0345467	0.00291164	0.0333022	0.00274873	0.0336405	0.00279727	0.0338658	0.00282854	0.034022	0.00284922	0.999842
56	0.279052	0.942307	4.00241	962590847	2862441	0.0374092	0.00296487	0.0359925	0.00278659	0.0363826	0.00284017	0.0366414	0.00287491	0.0368196	0.00289771	0.999551
57	0.277948	0.938245	3.9315	959688555	2902292	0.0403114	0.00301508	0.0387073	0.00282028	0.0391539	0.00287904	0.03945	0.00291773	0.0396524	0.00294284	0.998273
58	0.276844	0.934164	3.86416	956741839	2946716	0.0432582	0.00307049	0.0414494	0.00285731	0.0419579	0.00292173	0.0422953	0.00296484	0.0425243	0.00299259	0.998729
59	0.275741	0.930065	3.79657	953750844	2990995	0.0462492	0.00312623	0.0442174	0.00289308	0.0447931	0.00296348	0.0451764	0.0030114	0.0454349	0.00304217	0.999274
60	0.274641	0.925954	3.72707	950716693	3034151	0.0492833	0.00318128	0.0470087	0.00292668	0.0476575	0.00300329	0.0480914	0.00305632	0.0483824	0.00309049	0.999586
61	0.273542	0.921825	3.66708	947639749	3076944	0.0523603	0.00323645	0.0498216	0.00295876	0.0505495	0.00304184	0.0510389	0.00310032	0.051366	0.00313825	0.999922
62	0.272445	0.917686	3.60533	944523074	3116675	0.0554769	0.00328888	0.0526518	0.0029866	0.0534648	0.00307639	0.054015	0.00314049	0.0543821	0.00318268	0.999417
63	0.27135	0.913529	3.54779	941362167	3160907	0.0586378	0.00334656	0.0555016	0.00301716	0.0564062	0.00311421	0.0570227	0.00318442	0.0574342	0.00323141	1.0005
64	0.270257	0.909362	3.49188	938163541	3198626	0.0618365	0.00339787	0.0583631	0.00303977	0.0593663	0.00314446	0.0600548	0.00322098	0.0605154	0.00327307	0.999667
65	0.269167	0.905184	3.43158	934922203	3241338	0.0650778	0.00345498	0.0612387	0.00306509	0.0623482	0.00317848	0.0631148	0.00326168	0.0636294	0.00331927	1.00054
66	0.268079	0.900998	3.37796	931642742	3279461	0.0683573	0.00350774	0.0641218	0.00308379	0.0653463	0.00320677	0.0661971	0.00329682	0.0667709	0.0033602	1.00015
67	0.266992	0.896805	3.32533	928326289	3316453	0.0716737	0.00355979	0.0670087	0.00309876	0.0683579	0.00323261	0.0692993	0.00332979	0.0699377	0.00339917	0.999576
68	0.265908	0.892604	3.27517	924973810	3352479	0.0750262	0.00361132	0.0698957	0.00310985	0.0713804	0.00325585	0.072419	0.00336058	0.0731278	0.00343635	0.99887
69	0.264823	0.888392	3.22641	921581329	3392481	0.0784187	0.00366765	0.0727828	0.00312124	0.0744154	0.00328112	0.0755585	0.00339412	0.0763436	0.00347671	0.999496
70	0.263741	0.884168	3.17593	918146398	3434931	0.0818536	0.00372721	0.0756683	0.00313108	0.0774627	0.0033066	0.0787185	0.00342893	0.0795864	0.00351868	1.00097
71	0.262663	0.879944	3.12738	914679095	3467303	0.0853209	0.00377642	0.0785399	0.00312755	0.0805109	0.00332	0.0818883	0.0034524	0.0828452	0.00354934	0.99966
72	0.261585	0.875711	3.08394	911175393	3503702	0.0888246	0.00383053	0.0813963	0.00312284	0.0835609	0.00333443	0.08507	0.00347846	0.0861225	0.00358304	0.999668
73	0.260508	0.87147	3.03698	907632033	3543360	0.092368	0.00388878	0.0842351	0.00311557	0.0866122	0.00334878	0.0882646	0.00350601	0.0894199	0.00361878	1.00074
74	0.259436	0.86723	2.98935	904054812	3577221	0.0959452	0.00394127	0.0870465	0.00309748	0.0896565	0.0033541	0.0914648	0.0035259	0.0927303	0.00364733	1.00032
75	0.258366	0.862986	2.94876	900446020	3608792	0.099554	0.00399178	0.0898233	0.00307156	0.0926881	0.00335334	0.0946663	0.00354131	0.0960503	0.00367232	0.99942
76	0.257296	0.858737	2.90837	896802770	3643250	0.103197	0.00404605	0.0925624	0.0030419	0.0957054	0.00335086	0.0978692	0.00355704	0.0993809	0.0036989	0.999469
77	0.256232	0.854494	2.86266	893128269	3674501	0.106872	0.00409733	0.0952551	0.00300253	0.098701	0.00334035	0.101068	0.00356669	0.102718	0.00372075	0.99879
78	0.255167	0.850238	2.8264	889415982	3712287	0.110584	0.0041565	0.0978991	0.00296047	0.101675	0.00333006	0.104265	0.00357933	0.106065	0.00374738	1.00002
79	0.254107	0.845988	2.78358	885673981	3742001	0.114326	0.00420726	0.100481	0.00290334	0.104616	0.00330652	0.107449	0.00358046	0.109412	0.00376385	0.99923
80	0.253046	0.841731	2.74796	881897231	3776750	0.118103	0.00426427	0.102998	0.0028409	0.107522	0.00328123	0.110622	0.00358224	0.112763	0.00378304	0.999922
81	0.251992	0.837484	2.70402	878091225	3806006	0.121909	0.0043157	0.105436	0.0027646	0.110384	0.00324463	0.113774	0.00357418	0.116109	0.00379411	0.999306
82	0.250937	0.833231	2.67087	874253088	3838137	0.125747	0.004371	0.107789	0.0026796	0.113196	0.00320307	0.116903	0.00356346	0.11945	0.00380491	0.999588
83	0.249886	0.82898	2.63416	870385353	3867735	0.129615	0.00442404	0.110045	0.00258143	0.115951	0.00315103	0.120002	0.00354441	0.122781	0.00380972	0.999355
84	0.248837	0.824729	2.59736	866484910	3900443	0.133515	0.00448128	0.112199	0.00247425	0.118643	0.00309244	0.123067	0.00352189	0.1261	0.00381366	1.00006
85	0.247793	0.820485	2.56031	862556171	3928739	0.137444	0.00453411	0.114238	0.00235379	0.12126	0.00302067	0.12609	0.00348886	0.1294	0.00380893	0.999782
86	0.246748	0.816238	2.52896	858598183	3957988	0.141402	0.00458867	0.116157	0.00222399	0.123795	0.00293946	0.129066	0.00344986	0.132678	0.00380025	0.999885
87	0.245707	0.811995	2.49506	854611631	3986552	0.145388	0.00464309	0.117946	0.00208424	0.126239	0.0028464	0.131987	0.00340246	0.135928	0.00378528	0.999956
88	0.244667	0.80775	2.46307	850593740	4017891	0.149406	0.00470142	0.119601	0.00193656	0.128584	0.00274328	0.134849	0.00334859	0.139147	0.00376664	1.00086
89	0.243631	0.803516	2.4294	846553939	4039801	0.153446	0.00474939	0.121112	0.00177599	0.130814	0.00262228	0.137637	0.00327746	0.142322	0.00373259	0.999556
90	0.242599	0.799292	2.39621	842489766	4064173	0.15751	0.00480084	0.122475	0.00160977	0.132924	0.00249226	0.140344	0.00319837	0.145449	0.00369411	0.99901
91	0.24157	0.79507	2.36554	838397399	4092367	0.161603	0.00485747	0.123688	0.00144024	0.134908	0.00235427	0.142966	0.00311165	0.148526	0.00365194	0.999541
92	0.240544	0.790853	2.33429	834277781	4119618	0.165722	0.00491368	0.124751	0.00126827	0.136757	0.0022057	0.145491	0.00301228	0.151545	0.00360075	0.999976
93	0.239519	0.786637	2.30665	830133110	4144671	0.169867	0.00496797	0.125667	0.00109708	0.138464	0.00204636	0.14791	0.00289881	0.154497	0.00353844	1.00002
94	0.238497	0.782433	2.27651	825967978	4165132	0.174032	0.00501743	0.126439	0.00093003	0.140022	0.00187622	0.150209	0.00277027	0.157371	0.00346243	0.999089
95	0.237478	0.778235	2.24781	821777894	4190084	0.178222	0.00507294	0.127077	0.000773116	0.141426	0.00170101	0.152385	0.00263351	0.160163	0.00337964	0.999377
96	0.236462	0.774045	2.21863	817565439	4212455	0.182435	0.00512603	0.127593	0.000627938	0.142675	0.00151987	0.154426	0.00248443	0.162861	0.00328368	0.999186
97	0.23545	0.76986	2.19136	813328541	4236898	0.186671	0.00518234	0.128001	0.000498541	0.143769	0.00133761	0.156328	0.0023263	0.165459	0.00317698	0.999621
98	0.234441	0.765692	2.16279	809075546	4252995	0.190924	0.00522912	0.128315	0.000385805	0.144708	0.00115475	0.15808	0.00215393	0.16794	0.00305119	0.998229
99	0.233434	0.761527	2.1354	804796307	4279239	0.195204	0.00528905	0.128551	0.00029222	0.145501	0.000980378	0.15968	0.00197779	0.170303	0.00292024	0.999348
100	0.232433	0.757376	2.10749	800497464	4298843	0.199503	0.00534153	0.128725	0.000215958	0.146157	0.000814049	0.161122	0.00179107	0.172535	0.00277295	0.999052
101	0.231434	0.753231	2.08275	796178605	4318859	0.203821	0.00539522	0.12885	0.000156084	0.146686	0.000660914	0.162402	0.00159968	0.174628	0.0026149	0.998985
102	0.230438	0.749097	2.05541	791837139	4341466	0.208163	0.00545288	0.128938	0.000110203	0.147103	0.000524567	0.163523	0.00140744	0.176577	0.00244774	0.999648
103	0.229444	0.744968	2.03255	787477212	4359927	0.212523	0.00550609	0.128998	7.57087e-05	0.147425	0.000406239	0.164486	0.00121591	0.178373	0.00226801	0.99949
104	0.228455	0.740856	2.00607	783100823	4376389	0.216899	0.00555748	0.129037	5.05175e-05	0.147667	0.000307051	0.165297	0.00103013	0.180009	0.00207816	0.999008
105	0.227467	0.736747	1.98265	778701191	4399632	0.221299	0.00561822	0.129063	3.27542e-05	0.147845	0.000227145	0.165967	0.000856217	0.181484	0.00188385	1.0002
106	0.226481	0.732648	1.95918	774284629	4416562	0.225715	0.0056717	0.129079	2.04748e-05	0.147972	0.000164082	0.166508	0.000694784	0.182794	0.00168166	1.00009
107	0.2255	0.728563	1.93516	769852811	4431818	0.230147	0.00572376	0.129088	1.23061e-05	0.148062	0.000115677	0.166935	0.000550626	0.183938	0.00147736	0.999731
108	0.224523	0.724491	1.91119	765404482	4448329	0.234596	0.00577816	0.129094	7.10713e-06	0.148123	7.94496e-05	0.167263	0.000426312	0.18492	0.00127599	0.999785
109	0.223546	0.720423	1.89139	760939549	4464933	0.23906	0.00583343	0.129097	3.9084e-06	0.148164	5.30259e-05	0.16751	0.000322297	0.185748	0.00108128	0.999988
110	0.222574	0.716369	1.86782	756458992	4480557	0.243541	0.00588819	0.129098	2.06087e-06	0.14819	3.43282e-05	0.167691	0.00023806	0.18643	0.00089736	1.0001
111	0.221605	0.71233	1.84564	751966330	4492662	0.248034	0.00593907	0.129099	1.00964e-06	0.148206	2.144e-05	0.167821	0.000171817	0.186981	0.000727536	0.999557
112	0.220639	0.708304	1.82302	747457577	4508753	0.252542	0.00599595	0.1291	4.79676e-07	0.148216	1.28913e-05	0.167912	0.000121178	0.187415	0.00057681	1.00003
113	0.219678	0.704292	1.80168	742938034	4519543	0.257062	0.00604655	0.1291	1.81397e-07	0.148221	7.43726e-06	0.167974	8.31401e-05	0.187748	0.000446115	0.999447
114	0.218718	0.700289	1.78239	738404361	4533673	0.261596	0.00610236	0.1291	6.10236e-08	0.148224	4.08858e-06	0.168015	5.54704e-05	0.187999	0.000337155	0.999731
115	0.217764	0.696301	1.76041	733858476	4545885	0.266142	0.00615636	0.1291	0	0.148226	2.15473e-06	0.168042	3.58916e-05	0.188182	0.000248902	0.999718
116	0.216812	0.692331	1.73895	729302076	4556400	0.270698	0.00620883	0.1291	0	0.148227	1.0555e-06	0.168058	2.24139e-05	0.188314	0.000179621	0.999457
117	0.215863	0.68837	1.7202	724733294	4568782	0.275267	0.00626459	0.1291	0	0.148227	5.01168e-07	0.168068	1.34689e-05	0.188406	0.000126607	0.999728
118	0.214919	0.684425	1.70068	720156383	4576911	0.279844	0.0063153	0.1291	0	0.148227	1.89459e-07	0.168074	7.76782e-06	0.188469	8.68354e-05	0.999194
119	0.213978	0.680495	1.68007	715568328	4588055	0.284432	0.00637091	0.1291	0	0.148227	6.37091e-08	0.168077	4.26851e-06	0.188511	5.79116e-05	0.999438
120	0.213038	0.676574	1.66243	710968702	4599626	0.289031	0.00642793	0.1291	0	0.148227	0	0.168078	2.24978e-06	0.188538	3.74749e-05	0.999896
