# Supplementary material for: Quantifying the Potential for Future Gene Therapy to Lower Lifetime Risk of Polygenic Late-Onset Diseases
Source: MDPI journal article supplement (doi:10.3390/ijms20133352), 2019-07-08
Supplement: s2 [file s2 › SuppFiles/Results/LODsRareMedium/BreastCancer/1.000/IndividualsByBetaDistrib.csv]

nEntry	Beta	nDetrimentalCount	nFractionPopulation	nCumulativeFractionPopulation	nEditsNeeded	nIndividuals
0	-19.8	0	0	1	0	0
1	-19.6	0	0	1	0	0
2	-19.4	0	0	1	0	0
3	-19.2	0	0	1	0	0
4	-19	0	0	1	0	0
5	-18.8	0	0	1	0	0
6	-18.6	0	0	1	0	0
7	-18.4	0	0	1	0	0
8	-18.2	0	0	1	0	0
9	-18	0	0	1	0	0
10	-17.8	0	0	1	0	0
11	-17.6	0	0	1	0	0
12	-17.4	0	0	1	0	0
13	-17.2	0	0	1	0	0
14	-17	0	0	1	0	0
15	-16.8	0	0	1	0	0
16	-16.6	0	0	1	0	0
17	-16.4	0	0	1	0	0
18	-16.2	0	0	1	0	0
19	-16	0	0	1	0	0
20	-15.8	0	0	1	0	0
21	-15.6	0	0	1	0	0
22	-15.4	0	0	1	0	0
23	-15.2	0	0	1	0	0
24	-15	0	0	1	0	0
25	-14.8	0	0	1	0	0
26	-14.6	0	0	1	0	0
27	-14.4	0	0	1	0	0
28	-14.2	0	0	1	0	0
29	-14	0	0	1	0	0
30	-13.8	0	0	1	0	0
31	-13.6	0	0	1	0	0
32	-13.4	0	0	1	0	0
33	-13.2	0	0	1	0	0
34	-13	0	0	1	0	0
35	-12.8	0	0	1	0	0
36	-12.6	0	0	1	0	0
37	-12.4	0	0	1	0	0
38	-12.2	0	0	1	0	0
39	-12	0	0	1	0	0
40	-11.8	0	0	1	0	0
41	-11.6	0	0	1	0	0
42	-11.4	0	0	1	0	0
43	-11.2	0	0	1	0	0
44	-11	0	0	1	0	0
45	-10.8	0	0	1	0	0
46	-10.6	0	0	1	0	0
47	-10.4	0	0	1	0	0
48	-10.2	0	0	1	0	0
49	-10	0	0	1	0	0
50	-9.8	0	0	1	0	0
51	-9.6	0	0	1	0	0
52	-9.4	0	0	1	0	0
53	-9.2	0	0	1	0	0
54	-9	0	0	1	0	0
55	-8.8	0	0	1	0	0
56	-8.6	0	0	1	0	0
57	-8.4	0	0	1	0	0
58	-8.2	0	0	1	0	0
59	-8	0	0	1	0	0
60	-7.8	0	0	1	0	0
61	-7.6	0	0	1	0	0
62	-7.4	0	0	1	0	0
63	-7.2	0	0	1	0	0
64	-7	0	0	1	0	0
65	-6.8	0	0	1	0	0
66	-6.6	0	0	1	0	0
67	-6.4	0	0	1	0	0
68	-6.2	0	0	1	0	0
69	-6	0	0	1	0	0
70	-5.8	0	0	1	0	0
71	-5.6	0	0	1	0	0
72	-5.4	0	0	1	0	0
73	-5.2	0	0	1	0	0
74	-5	0	0	1	0	0
75	-4.8	0	0	1	0	0
76	-4.6	0	0	1	0	0
77	-4.4	0	0	1	0	0
78	-4.2	0	0	1	0	0
79	-4	0	0	1	0	0
80	-3.8	0	0	1	0	0
81	-3.6	0	0	1	0	0
82	-3.4	0	0	1	0	0
83	-3.2	0	0	1	0	0
84	-3	0	0	1	0	0
85	-2.8	0	0.002629336	1	0	2629336
86	-2.6	1	0.003246473	0.99737066	0	3246473
87	-2.4	1.224	0.008373155	0.99412419	0	8373155
88	-2.2	1.6589	0.017061353	0.98575104	0	17061353
89	-2	2.1613	0.014348523	0.96868968	0	14348523
90	-1.8	2.5303	0.02746708	0.95434116	0	27467080
91	-1.6	2.9111	0.040106273	0.92687408	0	40106273
92	-1.4	3.306	0.03678608	0.88676781	0	36786080
93	-1.2	3.6991	0.052533363	0.84998173	0	52533363
94	-1	4.0328	0.063021673	0.79744836	0	63021673
95	-0.8	4.4416	0.057068707	0.73442669	0	57068707
96	-0.6	4.846	0.067865672	0.67735798	0	67865672
97	-0.4	5.1298	0.070936944	0.60949231	0	70936944
98	-0.2	5.5651	0.064254422	0.53855537	0	64254422
99	0	5.969	0.067475982	0.47430095	0	67475982
100	0.2	6.2664	0.063325429	0.40682496	0.29742	63325429
101	0.4	6.6746	0.055155017	0.34349954	0.70561	55155017
102	0.6	7.1007	0.04977858	0.28834452	1.1317	49778580
103	0.8	7.3618	0.045889987	0.23856594	1.3928	45889987
104	1	7.7602	0.037709825	0.19267595	1.7912	37709825
105	1.2	8.1385	0.032664715	0.15496613	2.1695	32664715
106	1.4	8.453	0.027183389	0.12230141	2.484	27183389
107	1.6	8.8503	0.021891243	0.095118022	2.8813	21891243
108	1.8	9.2205	0.018031393	0.073226779	3.2515	18031393
109	2	9.543	0.014112093	0.055195386	3.574	14112093
110	2.2	9.9309	0.010700734	0.041083293	3.9619	10700734
111	2.4	10.301	0.008324777	0.030382559	4.3323	8324777
112	2.6	10.634	0.006201777	0.022057782	4.6653	6201777
113	2.8	11.005	0.004557831	0.015856005	5.0357	4557831
114	3	11.361	0.003371453	0.011298174	5.3916	3371453
115	3.2	11.691	0.002414262	0.007926721	5.7218	2414262
116	3.4	12.067	0.001728108	0.005512459	6.0982	1728108
117	3.6	12.422	0.001230355	0.003784351	6.4532	1230355
118	3.8	12.761	0.000849806	0.002553996	6.7922	849806
119	4	13.13	0.000574509	0.00170419	7.1606	574509
120	4.2	13.494	0.000390209	0.001129681	7.525	390209
121	4.4	13.834	0.000261038	0.000739472	7.8649	261038
122	4.6	14.2	0.000170574	0.000478434	8.2306	170574
123	4.8	14.541	0.000112619	0.00030786	8.572	112619
124	5	14.885	7.2608e-05	0.000195241	8.9164	72608
125	5.2	15.243	4.6488e-05	0.000122633	9.2736	46488
126	5.4	15.606	2.949e-05	7.6145e-05	9.6374	29490
127	5.6	15.955	1.8212e-05	4.6655e-05	9.9857	18212
128	5.8	16.319	1.1325e-05	2.8443e-05	10.35	11325
129	6	16.66	6.901e-06	1.7118e-05	10.691	6901
130	6.2	16.996	4.181e-06	1.0217e-05	11.027	4181
131	6.4	17.356	2.512e-06	6.036e-06	11.387	2512
132	6.6	17.698	1.514e-06	3.524e-06	11.729	1514
133	6.8	18.058	8.43e-07	2.01e-06	12.089	843
134	7	18.325	5.2e-07	1.167e-06	12.356	520
135	7.2	18.741	2.74e-07	6.47e-07	12.772	274
136	7.4	19.263	1.56e-07	3.73e-07	13.294	156
137	7.6	19.544	1.14e-07	2.17e-07	13.575	114
138	7.8	19.591	4.4e-08	1.03e-07	13.622	44
139	8	20.04	2.5e-08	5.9e-08	14.071	25
140	8.2	20.714	2.1e-08	3.4e-08	14.745	21
141	8.4	21.6	5e-09	1.3e-08	15.631	5
142	8.6	20.8	5e-09	8e-09	14.831	5
143	8.8	0	0	3e-09	0	0
144	9	22	1e-09	3e-09	16.031	1
145	9.2	21	1e-09	2e-09	15.031	1
146	9.4	23	1e-09	1e-09	17.031	1
147	9.6	0	0	0	0	0
148	9.8	0	0	0	0	0
149	10	0	0	0	0	0
150	10.2	0	0	0	0	0
151	10.4	0	0	0	0	0
152	10.6	0	0	0	0	0
153	10.8	0	0	0	0	0
154	11	0	0	0	0	0
155	11.2	0	0	0	0	0
156	11.4	0	0	0	0	0
157	11.6	0	0	0	0	0
158	11.8	0	0	0	0	0
159	12	0	0	0	0	0
160	12.2	0	0	0	0	0
161	12.4	0	0	0	0	0
162	12.6	0	0	0	0	0
163	12.8	0	0	0	0	0
164	13	0	0	0	0	0
165	13.2	0	0	0	0	0
166	13.4	0	0	0	0	0
167	13.6	0	0	0	0	0
168	13.8	0	0	0	0	0
169	14	0	0	0	0	0
170	14.2	0	0	0	0	0
171	14.4	0	0	0	0	0
172	14.6	0	0	0	0	0
173	14.8	0	0	0	0	0
174	15	0	0	0	0	0
175	15.2	0	0	0	0	0
176	15.4	0	0	0	0	0
177	15.6	0	0	0	0	0
178	15.8	0	0	0	0	0
179	16	0	0	0	0	0
180	16.2	0	0	0	0	0
181	16.4	0	0	0	0	0
182	16.6	0	0	0	0	0
183	16.8	0	0	0	0	0
184	17	0	0	0	0	0
185	17.2	0	0	0	0	0
186	17.4	0	0	0	0	0
187	17.6	0	0	0	0	0
188	17.8	0	0	0	0	0
189	18	0	0	0	0	0
190	18.2	0	0	0	0	0
191	18.4	0	0	0	0	0
192	18.6	0	0	0	0	0
193	18.8	0	0	0	0	0
194	19	0	0	0	0	0
195	19.2	0	0	0	0	0
196	19.4	0	0	0	0	0
197	19.6	0	0	0	0	0
198	19.8	0	0	0	0	0
199	20	0	0	0	0	0
