# Supplementary material for: Quantifying the Potential for Future Gene Therapy to Lower Lifetime Risk of Polygenic Late-Onset Diseases
Source: MDPI journal article supplement (doi:10.3390/ijms20133352), 2019-07-08
Supplement: s2 [file s2 › SuppFiles/Results/LODsRareMedium/BreastCancer/EnvironmentArray.csv]

Age	Env	Incidence	CasesExpected
0	0	0	0
1	0	0	0
2	0	0	0
3	0	0	0
4	0	0	0
5	0	0	0
6	0	0	0
7	0	0	0
8	0	0	0
9	0	0	0
10	0	0	0
11	0	0	0
12	0	0	0
13	0	0	0
14	0	0	0
15	0	0	0
16	0	0	0
17	0	0	0
18	0	0	0
19	0	0	0
20	0	0	0
21	0	0	0
22	0	0	0
23	0	0	0
24	0	0	0
25	5.355532e-06	1.21538e-05	303
26	2.153329e-05	4.87512e-05	1218
27	3.8966691e-05	8.81024e-05	2202
28	5.7749346e-05	0.000130415	3259
29	7.8004438e-05	0.000175911	4396
30	9.9970033e-05	0.000224831	5618
31	0.00012361846	0.000277432	6931
32	0.00014932156	0.000333991	8341
33	0.00017705806	0.000394806	9857
34	0.00020704997	0.000460197	11485
35	0.0002396905	0.000530509	13234
36	0.00027512031	0.000606112	15112
37	0.00031347069	0.000687404	17128
38	0.00035506605	0.000774813	19293
39	0.00040039197	0.000868799	21617
40	0.00044962271	0.000969857	24110
41	0.00050320643	0.00107852	26786
42	0.00056147467	0.00119536	29655
43	0.00062491621	0.00132099	32733
44	0.00069399717	0.00145608	36033
45	0.00076944448	0.00160133	39569
46	0.00085176831	0.00175751	43359
47	0.000941467	0.00192544	47419
48	0.0010397929	0.00210601	51766
49	0.0011468027	0.00230017	56419
50	0.00126401	0.00250893	61399
51	0.0013922537	0.00273341	66724
52	0.0014431631	0.0028039	68258
53	0.0014856506	0.002858	69380
54	0.0015287014	0.0029121	70491
55	0.0015726609	0.0029662	71592
56	0.0016174399	0.0030203	72681
57	0.0016627392	0.0030744	73760
58	0.0017086997	0.0031285	74827
59	0.00175528	0.0031826	75883
60	0.0018024366	0.0032367	76927
61	0.0018501609	0.0032908	77959
62	0.0018987382	0.0033449	78980
63	0.0019480677	0.003399	79989
64	0.0019978478	0.0034531	80986
65	0.0020481615	0.0035072	81971
66	0.0020995244	0.0035613	82944
67	0.002151366	0.0036154	83904
68	0.002204069	0.0036695	84851
69	0.0022573301	0.0037236	85786
70	0.0023116319	0.0037777	86709
71	0.0023664745	0.0038318	87618
72	0.0024219288	0.0038859	88515
73	0.0024785895	0.00394	89399
74	0.0025360428	0.0039941	90269
75	0.0025937353	0.0040482	91127
76	0.0026525758	0.0041023	91970
77	0.0027120145	0.0041564	92801
78	0.002772203	0.0042105	93618
79	0.0028333185	0.0042646	94422
80	0.0028950997	0.0043187	95212
81	0.0029577319	0.0043728	95989
82	0.0030213515	0.0044269	96752
83	0.0030859832	0.004481	97501
84	0.0031509393	0.0045351	98236
85	0.0032174169	0.0045892	98957
86	0.003284455	0.0046433	99664
87	0.0033523819	0.0046974	100357
88	0.0034216004	0.0047515	101036
89	0.0034908811	0.0048056	101701
90	0.0035616536	0.0048597	102352
91	0.0036338491	0.0049138	102989
92	0.0037061662	0.0049679	103611
93	0.0037793846	0.005022	104219
94	0.0038531228	0.0050761	104813
95	0.0039282386	0.0051302	105393
96	0.0040050757	0.0051843	105957
97	0.0040820805	0.0052384	106508
98	0.0041601435	0.0052925	107045
99	0.0042392993	0.0053466	107567
100	0.0043191461	0.0054007	108074
101	0.0044007715	0.0054548	108568
102	0.0044838905	0.0055089	109046
103	0.004567263	0.005563	109510
104	0.0046516925	0.0056171	109960
105	0.0047372192	0.0056712	110396
106	0.0048239799	0.0057253	110817
107	0.0049118839	0.0057794	111224
108	0.0050002562	0.0058335	111617
109	0.0050910603	0.0058876	111994
110	0.0051815426	0.0059417	112358
111	0.0052735705	0.0059958	112707
112	0.0053661476	0.0060499	113042
113	0.0054613525	0.006104	113363
114	0.0055571391	0.0061581	113669
115	0.0056535144	0.0062122	113962
116	0.005751045	0.0062663	114241
117	0.0058504334	0.0063204	114505
118	0.0059505364	0.0063745	114756
119	0.0060521465	0.0064286	114991
