# Supplementary material for: Quantifying the Potential for Future Gene Therapy to Lower Lifetime Risk of Polygenic Late-Onset Diseases
Source: MDPI journal article supplement (doi:10.3390/ijms20133352), 2019-07-08
Supplement: s2 [file s2 › SuppFiles/Results/LODsRareMedium/BreastCancer/EnvironmentArraySD.csv]

Age	Env	EnvSD	Incidence	CasesExpected
0	0	0	0	0
1	0	0	0	0
2	0	0	0	0
3	0	0	0	0
4	0	0	0	0
5	0	0	0	0
6	0	0	0	0
7	0	0	0	0
8	0	0	0	0
9	0	0	0	0
10	0	0	0	0
11	0	0	0	0
12	0	0	0	0
13	0	0	0	0
14	0	0	0	0
15	0	0	0	0
16	0	0	0	0
17	0	0	0	0
18	0	0	0	0
19	0	0	0	0
20	0	0	0	0
21	0	0	0	0
22	0	0	0	0
23	0	0	0	0
24	0	0	0	0
25	5.355532e-06	1.626e-08	1.21538e-05	303
26	2.153329e-05	2.716e-08	4.87512e-05	1218
27	3.8966691e-05	4.505e-08	8.81024e-05	2202
28	5.7749346e-05	5.499e-08	0.000130415	3259
29	7.8004438e-05	5.132e-08	0.000175911	4396
30	9.9970033e-05	7.932e-08	0.000224831	5618
31	0.00012361846	6.629e-08	0.000277432	6931
32	0.00014932156	7.774e-08	0.000333991	8341
33	0.00017705806	1.111e-07	0.000394806	9857
34	0.00020704997	7.705e-08	0.000460197	11485
35	0.0002396905	7.359e-08	0.000530509	13234
36	0.00027512031	9.482e-08	0.000606112	15112
37	0.00031347069	1.275e-07	0.000687404	17128
38	0.00035506605	1.441e-07	0.000774813	19293
39	0.00040039197	1.482e-07	0.000868799	21617
40	0.00044962271	1.805e-07	0.000969857	24110
41	0.00050320643	1.959e-07	0.00107852	26786
42	0.00056147467	2.204e-07	0.00119536	29655
43	0.00062491621	2.285e-07	0.00132099	32733
44	0.00069399717	2.131e-07	0.00145608	36033
45	0.00076944448	1.701e-07	0.00160133	39569
46	0.00085176831	2.228e-07	0.00175751	43359
47	0.000941467	3.156e-07	0.00192544	47419
48	0.0010397929	2.236e-07	0.00210601	51766
49	0.0011468027	2.197e-07	0.00230017	56419
50	0.00126401	2.675e-07	0.00250893	61399
51	0.0013922537	2.399e-07	0.00273341	66724
52	0.0014431631	1.748e-07	0.0028039	68258
53	0.0014856506	2.245e-07	0.002858	69380
54	0.0015287014	3e-07	0.0029121	70491
55	0.0015726609	4.234e-07	0.0029662	71592
56	0.0016174399	3.933e-07	0.0030203	72681
57	0.0016627392	3.353e-07	0.0030744	73760
58	0.0017086997	3.49e-07	0.0031285	74827
59	0.00175528	4.254e-07	0.0031826	75883
60	0.0018024366	2.997e-07	0.0032367	76927
61	0.0018501609	5.757e-07	0.0032908	77959
62	0.0018987382	4.505e-07	0.0033449	78980
63	0.0019480677	3.994e-07	0.003399	79989
64	0.0019978478	4.576e-07	0.0034531	80986
65	0.0020481615	3.963e-07	0.0035072	81971
66	0.0020995244	5.925e-07	0.0035613	82944
67	0.002151366	3.128e-07	0.0036154	83904
68	0.002204069	4.774e-07	0.0036695	84851
69	0.0022573301	4.374e-07	0.0037236	85786
70	0.0023116319	4.034e-07	0.0037777	86709
71	0.0023664745	4.639e-07	0.0038318	87618
72	0.0024219288	2.946e-07	0.0038859	88515
73	0.0024785895	5.37e-07	0.00394	89399
74	0.0025360428	7.028e-07	0.0039941	90269
75	0.0025937353	3.636e-07	0.0040482	91127
76	0.0026525758	5.961e-07	0.0041023	91970
77	0.0027120145	2.762e-07	0.0041564	92801
78	0.002772203	3.436e-07	0.0042105	93618
79	0.0028333185	5.856e-07	0.0042646	94422
80	0.0028950997	3.287e-07	0.0043187	95212
81	0.0029577319	5.637e-07	0.0043728	95989
82	0.0030213515	5.04e-07	0.0044269	96752
83	0.0030859832	5.681e-07	0.004481	97501
84	0.0031509393	6.676e-07	0.0045351	98236
85	0.0032174169	7.253e-07	0.0045892	98957
86	0.003284455	6.777e-07	0.0046433	99664
87	0.0033523819	6.938e-07	0.0046974	100357
88	0.0034216004	6.764e-07	0.0047515	101036
89	0.0034908811	6.442e-07	0.0048056	101701
90	0.0035616536	7.808e-07	0.0048597	102352
91	0.0036338491	6.897e-07	0.0049138	102989
92	0.0037061662	6.317e-07	0.0049679	103611
93	0.0037793846	7.977e-07	0.005022	104219
94	0.0038531228	4.826e-07	0.0050761	104813
95	0.0039282386	9.525e-07	0.0051302	105393
96	0.0040050757	9.894e-07	0.0051843	105957
97	0.0040820805	9.06e-07	0.0052384	106508
98	0.0041601435	8.672e-07	0.0052925	107045
99	0.0042392993	1.064e-06	0.0053466	107567
100	0.0043191461	7.898e-07	0.0054007	108074
101	0.0044007715	9.943e-07	0.0054548	108568
102	0.0044838905	9.06e-07	0.0055089	109046
103	0.004567263	4.91e-07	0.005563	109510
104	0.0046516925	6.959e-07	0.0056171	109960
105	0.0047372192	7.944e-07	0.0056712	110396
106	0.0048239799	7.772e-07	0.0057253	110817
107	0.0049118839	8.107e-07	0.0057794	111224
108	0.0050002562	1.189e-06	0.0058335	111617
109	0.0050910603	1.318e-06	0.0058876	111994
110	0.0051815426	6.554e-07	0.0059417	112358
111	0.0052735705	9.393e-07	0.0059958	112707
112	0.0053661476	9.357e-07	0.0060499	113042
113	0.0054613525	1.375e-06	0.006104	113363
114	0.0055571391	8.56e-07	0.0061581	113669
115	0.0056535144	9.811e-07	0.0062122	113962
116	0.005751045	1.009e-06	0.0062663	114241
117	0.0058504334	1.15e-06	0.0063204	114505
118	0.0059505364	8.218e-07	0.0063745	114756
119	0.0060521465	1.348e-06	0.0064286	114991
