# Supplementary material for: Quantifying the Potential for Future Gene Therapy to Lower Lifetime Risk of Polygenic Late-Onset Diseases
Source: MDPI journal article supplement (doi:10.3390/ijms20133352), 2019-07-08
Supplement: s2 [file s2 › SuppFiles/Results/LODsRareMedium/BreastCancer/FrailtyAnalysis.csv]

Age	Heritability	MeanOR	CaseOR	nControls	nCases	nCumIncidence	nIncidence	nLifeIncidence0	nAbsIncidence0	nLifeIncidence5	nAbsIncidence5	nLifeIncidence10	nAbsIncidence10	nLifeIncidence15	nAbsIncidence15
26	0.29601	1.0002	5.4911	9999889	111	1.11e-05	1.11e-05	1.0981e-05	1.0981e-05	1.1005e-05	1.1005e-05	1.102e-05	1.102e-05	1.1026e-05	1.1026e-05
27	0.29598	1.0002	5.9573	9999386	503	6.14e-05	5.0301e-05	6.0716e-05	4.9736e-05	6.0857e-05	4.9852e-05	6.0948e-05	4.9928e-05	6.0987e-05	4.9961e-05
28	0.29593	0.99999	5.7499	9998462	924	0.0001538	9.2406e-05	0.00015203	9.1317e-05	0.0001524	9.1545e-05	0.00015264	9.1701e-05	0.00015276	9.1775e-05
29	0.29585	0.99975	5.6266	9997101	1361	0.0002899	0.00013612	0.00028645	0.00013444	0.00028717	0.00013479	0.00028767	0.00013505	0.00028791	0.00013518
30	0.29575	0.99946	6.0315	9995448	1653	0.0004552	0.00016535	0.00044961	0.00016321	0.00045078	0.00016366	0.00045161	0.00016399	0.00045205	0.00016418
31	0.29563	0.99908	5.272	9993179	2269	0.0006821	0.000227	0.00067342	0.00022392	0.00067525	0.00022457	0.00067657	0.00022506	0.00067731	0.00022537
32	0.29547	0.99859	5.6773	9990364	2815	0.0009636	0.00028169	0.00095091	0.00027768	0.00095359	0.00027853	0.00095557	0.00027918	0.00095673	0.00027961
33	0.29527	0.998	5.8978	9987029	3335	0.0012971	0.00033382	0.0012794	0.00032883	0.0012832	0.00032989	0.001286	0.00033071	0.0012877	0.00033127
34	0.29504	0.99732	5.6933	9983107	3922	0.0016893	0.00039271	0.0016655	0.00038655	0.0016705	0.00038786	0.0016743	0.00038888	0.0016768	0.00038961
35	0.29478	0.99651	5.6368	9978473	4634	0.0021527	0.00046418	0.0021212	0.00045653	0.0021279	0.00045817	0.002133	0.00045944	0.0021364	0.00046038
36	0.29449	0.99561	5.3703	9973080	5393	0.002692	0.00054046	0.0026512	0.00053109	0.0026599	0.00053312	0.0026665	0.00053468	0.0026711	0.00053585
37	0.29416	0.99459	5.5322	9967143	5937	0.0032857	0.0005953	0.003234	0.00058444	0.0032451	0.00058682	0.0032536	0.00058862	0.0032595	0.00059
38	0.2938	0.99345	5.3463	9960353	6790	0.0039647	0.00068124	0.0039	0.00066813	0.003914	0.00067105	0.0039246	0.00067321	0.0039322	0.0006749
39	0.29338	0.99213	5.4306	9952554	7799	0.0047446	0.000783	0.004664	0.00076711	0.0046816	0.00077072	0.0046948	0.00077333	0.0047045	0.00077537
40	0.29292	0.99066	5.4052	9943850	8704	0.005615	0.00087455	0.0055158	0.0008558	0.0055377	0.00086013	0.005554	0.00086322	0.005566	0.00086561
41	0.29243	0.98909	5.2018	9934333	9517	0.0065667	0.00095707	0.0064459	0.0009354	0.0064729	0.00094048	0.0064927	0.00094407	0.0065075	0.00094682
42	0.29188	0.98731	5.2397	9923614	10719	0.0076386	0.001079	0.0074921	0.0010531	0.0075252	0.0010593	0.0075493	0.0010636	0.0075673	0.0010669
43	0.29129	0.98537	5.0766	9911706	11908	0.0088294	0.0012	0.0086527	0.0011695	0.0086931	0.0011769	0.0087223	0.001182	0.0087441	0.0011858
44	0.29066	0.98328	4.8996	9898626	13080	0.010137	0.0013197	0.0099256	0.0012842	0.0099746	0.0012929	0.01001	0.0012989	0.010036	0.0013034
45	0.28998	0.98098	4.9	9884244	14382	0.011576	0.0014529	0.011323	0.0014115	0.011382	0.0014218	0.011424	0.001429	0.011456	0.0014341
46	0.28924	0.97848	4.8399	9868452	15792	0.013155	0.0015977	0.012854	0.0015492	0.012925	0.0015615	0.012976	0.00157	0.013013	0.001576
47	0.28844	0.97577	4.7227	9851112	17340	0.014889	0.0017571	0.014532	0.0017004	0.014618	0.001715	0.014678	0.001725	0.014723	0.0017321
48	0.28755	0.97276	4.7674	9831960	19152	0.016804	0.0019441	0.016381	0.0018772	0.016484	0.0018948	0.016557	0.0019067	0.016609	0.0019151
49	0.28664	0.9696	4.5692	9811327	20633	0.018867	0.0020986	0.018369	0.0020215	0.018492	0.0020421	0.018578	0.002056	0.01864	0.0020656
50	0.28567	0.96619	4.4795	9788767	22560	0.021123	0.0022994	0.020536	0.0022091	0.020684	0.0022338	0.020786	0.0022501	0.020859	0.0022615
51	0.28461	0.96247	4.4607	9764140	24627	0.023586	0.0025158	0.022895	0.00241	0.023072	0.0024395	0.023193	0.0024589	0.023279	0.0024722
52	0.28351	0.95855	4.312	9737632	26508	0.026237	0.0027148	0.025427	0.0025923	0.025637	0.0026272	0.02578	0.0026498	0.025881	0.0026653
53	0.28238	0.95454	4.229	9710239	27393	0.028976	0.0028131	0.028033	0.0026768	0.028282	0.0027163	0.02845	0.0027417	0.028568	0.002759
54	0.28126	0.9505	4.165	9682326	27913	0.031767	0.0028746	0.030679	0.0027249	0.030971	0.002769	0.031166	0.0027973	0.031303	0.0028162
55	0.28013	0.9464	4.1174	9653881	28445	0.034612	0.0029378	0.033364	0.0027735	0.033704	0.0028224	0.033929	0.002854	0.034086	0.0028748
56	0.27902	0.94235	3.9647	9625041	28840	0.037496	0.0029874	0.036075	0.0028078	0.036466	0.0028617	0.036726	0.0028968	0.036905	0.0029197
57	0.2779	0.93825	3.9541	9595870	29171	0.040413	0.0030307	0.038804	0.0028349	0.039252	0.002894	0.039549	0.0029329	0.039752	0.0029581
58	0.27681	0.9342	3.8536	9566606	29264	0.043339	0.0030496	0.041527	0.0028379	0.042036	0.0029019	0.042375	0.0029447	0.042604	0.0029723
59	0.2757	0.93011	3.8044	9536777	29829	0.046322	0.003118	0.044287	0.0028855	0.044864	0.0029557	0.045248	0.0030035	0.045507	0.0030342
60	0.27461	0.92599	3.6989	9506184	30593	0.049382	0.0032079	0.047102	0.0029512	0.047752	0.0030284	0.048187	0.0030819	0.048479	0.0031163
61	0.2735	0.92185	3.6292	9475158	31026	0.052484	0.0032638	0.049938	0.0029837	0.050668	0.0030675	0.051159	0.0031265	0.051487	0.0031647
62	0.27242	0.91776	3.572	9444120	31038	0.055588	0.0032757	0.052757	0.0029747	0.053571	0.0030641	0.054123	0.0031279	0.054491	0.00317
63	0.27131	0.91357	3.5746	9412477	31643	0.058752	0.0033506	0.05561	0.0030208	0.056516	0.0031179	0.057134	0.0031882	0.057546	0.0032353
64	0.27022	0.90942	3.4874	9380567	31910	0.061943	0.0033902	0.058464	0.0030329	0.059469	0.0031373	0.060159	0.0032137	0.06062	0.0032657
65	0.26912	0.90524	3.4464	9348259	32308	0.065174	0.0034441	0.06133	0.0030555	0.062441	0.0031685	0.063209	0.0032514	0.063724	0.0033089
66	0.26804	0.90108	3.4048	9315858	32401	0.068414	0.003466	0.064179	0.0030471	0.065403	0.0031686	0.066254	0.0032576	0.066828	0.0033202
67	0.26694	0.89689	3.365	9283048	32810	0.071695	0.003522	0.067035	0.0030658	0.068383	0.0031982	0.069323	0.0032944	0.069961	0.003363
68	0.26585	0.8927	3.29	9249657	33391	0.075034	0.003597	0.06991	0.0030975	0.071393	0.0032429	0.07243	0.0033472	0.073138	0.0034227
69	0.26476	0.88848	3.2372	9215818	33839	0.078418	0.0036584	0.07279	0.0031134	0.074421	0.0032728	0.075562	0.0033856	0.076346	0.0034679
70	0.26369	0.88428	3.1745	9181610	34208	0.081839	0.0037119	0.075664	0.0031182	0.077455	0.003293	0.078709	0.0034148	0.079575	0.0035042
71	0.2626	0.88006	3.1281	9146972	34638	0.085303	0.0037725	0.078533	0.0031243	0.0805	0.0033166	0.081876	0.0034489	0.082831	0.0035457
72	0.2615	0.87578	3.1291	9111958	35014	0.088804	0.0038279	0.081387	0.0031207	0.083548	0.0033322	0.085055	0.0034761	0.086106	0.0035806
73	0.26043	0.87157	3.028	9076691	35267	0.092331	0.0038704	0.084213	0.0031009	0.086585	0.003333	0.088235	0.0034894	0.089388	0.0036017
74	0.25936	0.86737	2.9626	9041017	35674	0.095898	0.0039303	0.087016	0.0030889	0.089621	0.0033448	0.091426	0.0035161	0.092689	0.0036372
75	0.25829	0.86308	2.963	9004678	36339	0.099532	0.0040193	0.089812	0.0030928	0.092674	0.0033765	0.09465	0.0035658	0.096032	0.0036977
76	0.25723	0.85887	2.9005	8968523	36155	0.10315	0.0040151	0.092531	0.0030187	0.095668	0.0033253	0.097828	0.0035299	0.099337	0.0036706
77	0.25617	0.85465	2.8548	8931862	36661	0.10681	0.0040877	0.095217	0.0029955	0.098657	0.0033325	0.10102	0.0035583	0.10267	0.003712
78	0.25509	0.85036	2.8225	8894431	37431	0.11056	0.0041907	0.097883	0.0029848	0.10166	0.0033575	0.10424	0.0036088	0.10604	0.0037782
79	0.25406	0.84619	2.7422	8857243	37188	0.11428	0.004181	0.10045	0.0028853	0.10458	0.0032859	0.10741	0.0035582	0.10937	0.0037404
80	0.25299	0.84191	2.7504	8819312	37931	0.11807	0.0042825	0.10298	0.002853	0.1075	0.0032952	0.11059	0.0035975	0.11273	0.0037992
81	0.25194	0.83767	2.7084	8781347	37965	0.12187	0.0043048	0.10541	0.0027576	0.11035	0.0032364	0.11374	0.0035651	0.11607	0.0037845
82	0.25088	0.83338	2.6854	8742824	38523	0.12572	0.0043869	0.10777	0.0026894	0.11317	0.0032147	0.11688	0.0035764	0.11942	0.0038188
83	0.24982	0.82912	2.6434	8704169	38655	0.12958	0.0044213	0.11003	0.0025799	0.11593	0.0031491	0.11998	0.0035422	0.12275	0.0038074
84	0.24878	0.82489	2.5858	8665178	38991	0.13348	0.0044796	0.11218	0.0024733	0.11862	0.0030913	0.12304	0.0035205	0.12607	0.0038122
85	0.24773	0.82064	2.557	8625837	39341	0.13742	0.0045401	0.11422	0.0023569	0.12124	0.0030247	0.12607	0.0034935	0.12938	0.003814
86	0.24667	0.81639	2.5355	8586276	39561	0.14137	0.0045863	0.11614	0.0022229	0.12377	0.002938	0.12904	0.0034481	0.13265	0.0037983
87	0.24565	0.81218	2.4832	8546581	39695	0.14534	0.0046231	0.11792	0.0020753	0.12621	0.0028341	0.13195	0.0033878	0.13589	0.003769
88	0.24461	0.80793	2.4553	8506218	40363	0.14938	0.0047227	0.11958	0.0019453	0.12856	0.0027557	0.13483	0.0033637	0.13912	0.0037837
89	0.24359	0.80374	2.4165	8466014	40204	0.1534	0.0047264	0.12109	0.0017674	0.13078	0.0026096	0.1376	0.0032616	0.14228	0.0037145
90	0.24257	0.79955	2.385	8425519	40495	0.15745	0.0047832	0.12244	0.0016039	0.13288	0.0024831	0.1403	0.0031866	0.1454	0.0036806
91	0.24154	0.79532	2.366	8384599	40920	0.16154	0.0048567	0.12366	0.00144	0.13487	0.0023539	0.14292	0.0031111	0.14847	0.0036513
92	0.24051	0.79107	2.3399	8343124	41475	0.16569	0.0049466	0.12473	0.0012768	0.13673	0.0022205	0.14546	0.0030324	0.15151	0.0036248
93	0.23949	0.78688	2.2988	8301768	41356	0.16982	0.0049569	0.12564	0.0010946	0.13843	0.0020418	0.14787	0.0028923	0.15446	0.0035305
94	0.23848	0.78268	2.2783	8260220	41548	0.17398	0.0050047	0.12641	0.00092767	0.13999	0.0018715	0.15017	0.0027633	0.15733	0.0034537
95	0.23745	0.77848	2.2356	8218055	42165	0.17819	0.0051046	0.12705	0.00077794	0.1414	0.0017116	0.15236	0.0026499	0.16014	0.0034007
96	0.23644	0.77434	2.2163	8176367	41688	0.18236	0.0050727	0.12756	0.00062141	0.14264	0.0015041	0.15438	0.0024586	0.16281	0.0032495
97	0.23543	0.77015	2.1779	8133739	42628	0.18663	0.0052136	0.12797	0.00050154	0.14374	0.0013457	0.15629	0.0023403	0.16542	0.0031961
98	0.2344	0.76591	2.1886	8091003	42736	0.1909	0.0052542	0.12829	0.00038765	0.14468	0.0011603	0.15805	0.0021642	0.16791	0.0030658
99	0.23339	0.76173	2.1373	8048008	42995	0.1952	0.0053139	0.12853	0.00029359	0.14548	0.00098499	0.15966	0.0019871	0.17029	0.002934
100	0.23238	0.75756	2.1141	8005047	42961	0.1995	0.0053381	0.1287	0.00021582	0.14613	0.00081353	0.1611	0.0017899	0.17252	0.0027712
101	0.23138	0.75337	2.0936	7961540	43507	0.20385	0.0054349	0.12883	0.00015723	0.14666	0.00066578	0.16239	0.0016115	0.17463	0.0026342
102	0.2304	0.74928	2.0418	7918324	43216	0.20817	0.0054281	0.12891	0.0001097	0.14708	0.00052218	0.16351	0.001401	0.17657	0.0024366
103	0.2294	0.74514	2.0263	7874465	43859	0.21255	0.0055389	0.12897	7.616e-05	0.1474	0.00040866	0.16447	0.0012232	0.17837	0.0022815
104	0.22842	0.74103	2.0103	7830814	43651	0.21692	0.0055434	0.12901	5.0389e-05	0.14765	0.00030627	0.16528	0.0010275	0.18	0.0020729
105	0.22741	0.73689	1.9919	7786712	44102	0.22133	0.0056319	0.12904	3.2834e-05	0.14782	0.0002277	0.16596	0.00085829	0.18148	0.0018884
106	0.22644	0.73281	1.9533	7742652	44060	0.22573	0.0056584	0.12906	2.0427e-05	0.14795	0.0001637	0.1665	0.00069315	0.18279	0.0016777
107	0.22547	0.72877	1.9133	7698308	44344	0.23017	0.0057272	0.12907	1.2314e-05	0.14804	0.00011575	0.16692	0.00055096	0.18393	0.0014783
108	0.22449	0.7247	1.9095	7653776	44532	0.23462	0.0057846	0.12907	7.1151e-06	0.1481	7.9539e-05	0.16725	0.00042679	0.18492	0.0012774
109	0.22353	0.72065	1.8842	7609106	44670	0.23909	0.0058363	0.12907	3.9103e-06	0.14814	5.3052e-05	0.1675	0.00032246	0.18575	0.0010818
110	0.22256	0.71662	1.8568	7564340	44766	0.24357	0.0058832	0.12908	2.0591e-06	0.14817	3.4299e-05	0.16768	0.00023786	0.18643	0.0008966
111	0.22161	0.7126	1.8319	7519231	45109	0.24808	0.0059634	0.12908	1.0138e-06	0.14819	2.1528e-05	0.16781	0.00017252	0.18698	0.00073051
112	0.22065	0.70862	1.8184	7474552	44679	0.25254	0.005942	0.12908	4.7536e-07	0.14819	1.2775e-05	0.1679	0.00012009	0.18741	0.00057162
113	0.2197	0.70461	1.7969	7429213	45339	0.25708	0.0060658	0.12908	1.8197e-07	0.1482	7.4609e-06	0.16796	8.3404e-05	0.18774	0.00044753
114	0.21877	0.70063	1.777	7384033	45180	0.2616	0.0060814	0.12908	6.0814e-08	0.1482	4.0745e-06	0.168	5.528e-05	0.18799	0.000336
115	0.21781	0.69665	1.7658	7338800	45233	0.26612	0.0061258	0.12908	0	0.1482	2.144e-06	0.16803	3.5713e-05	0.18818	0.00024767
116	0.21688	0.69272	1.7284	7293463	45337	0.27065	0.0061777	0.12908	0	0.14821	1.0502e-06	0.16805	2.2302e-05	0.18831	0.00017872
117	0.21595	0.68875	1.7126	7247385	46078	0.27526	0.0063177	0.12908	0	0.14821	5.0542e-07	0.16805	1.3583e-05	0.1884	0.00012768
118	0.21501	0.68483	1.6941	7201724	45661	0.27983	0.0063003	0.12908	0	0.14821	1.8901e-07	0.16806	7.7494e-06	0.18846	8.663e-05
119	0.21408	0.68092	1.6701	7155761	45963	0.28442	0.0063822	0.12908	0	0.14821	6.3822e-08	0.16806	4.2761e-06	0.18851	5.8014e-05
120	0.21314	0.67699	1.6609	7109612	46149	0.28904	0.0064492	0.12908	0	0.14821	0	0.16807	2.2572e-06	0.18853	3.7599e-05
