# Supplementary material for: Quantifying the Potential for Future Gene Therapy to Lower Lifetime Risk of Polygenic Late-Onset Diseases
Source: MDPI journal article supplement (doi:10.3390/ijms20133352), 2019-07-08
Supplement: s2 [file s2 › SuppFiles/Results/LODsRareMedium/CAD/-1.000/FrailtyAnalysis.csv]

Age	Heritability	MeanOR	CaseOR	nControls	nCases	nCumIncidence	nIncidence	nLifeIncidence0	nAbsIncidence0	nLifeIncidence5	nAbsIncidence5	nLifeIncidence10	nAbsIncidence10	nLifeIncidence15	nAbsIncidence15	nIncActDivExp
36	0.28008	0.443531	0.811898	999997650	2350	2.35e-06	2.35e-06	2.29147e-06	2.29147e-06	2.30489e-06	2.30489e-06	2.31631e-06	2.31631e-06	2.32589e-06	2.32589e-06	0.0597265
37	0.28008	0.44353	0.813435	999992490	5160	7.51e-06	5.16001e-06	7.31633e-06	5.02487e-06	7.36035e-06	5.05547e-06	7.3976e-06	5.0813e-06	7.42939e-06	5.10351e-06	0.0622275
38	0.280081	0.443528	0.817962	999984048	8442	1.5952e-05	8.44206e-06	1.55258e-05	8.20953e-06	1.56221e-05	8.26178e-06	1.57028e-05	8.30526e-06	1.57725e-05	8.34316e-06	0.0644661
39	0.280083	0.443524	0.817755	999971940	12108	2.806e-05	1.21082e-05	2.7283e-05	1.17574e-05	2.74578e-05	1.18359e-05	2.76029e-05	1.19003e-05	2.77285e-05	1.19562e-05	0.0658464
40	0.280084	0.44352	0.819305	999955366	16574	4.4634e-05	1.65745e-05	4.3352e-05	1.60694e-05	4.36394e-05	1.61821e-05	4.38758e-05	1.62734e-05	4.40798e-05	1.63518e-05	0.0684321
41	0.280087	0.443514	0.818704	999933408	21958	6.6592e-05	2.1959e-05	6.46064e-05	2.12553e-05	6.50505e-05	2.14121e-05	6.54123e-05	2.15375e-05	6.5723e-05	2.16442e-05	0.0716589
42	0.28009	0.443506	0.817477	999905612	27796	9.4388e-05	2.77979e-05	9.14652e-05	2.68606e-05	9.21185e-05	2.70698e-05	9.26452e-05	2.72347e-05	9.3095e-05	2.73738e-05	0.0737016
43	0.280093	0.443497	0.82135	999871117	34495	0.000128883	3.44983e-05	0.000124736	3.32736e-05	0.000125663	3.3548e-05	0.000126404	3.37615e-05	0.000127031	3.39392e-05	0.0758161
44	0.280098	0.443485	0.81765	999829098	42019	0.000170902	4.20244e-05	0.000165183	4.04523e-05	0.000166465	4.0807e-05	0.000167478	4.10793e-05	0.000168329	4.13029e-05	0.0777225
45	0.280103	0.443472	0.821377	999778149	50949	0.000221851	5.09577e-05	0.00021412	4.89459e-05	0.000215862	4.9405e-05	0.00021722	4.97513e-05	0.000218352	5.00321e-05	0.0802568
46	0.28011	0.443455	0.820125	999716957	61192	0.000283043	6.12056e-05	0.000272759	5.86515e-05	0.000275093	5.92442e-05	0.000276888	5.96813e-05	0.000278369	6.00307e-05	0.0828736
47	0.280117	0.443435	0.815997	999644056	72901	0.000355944	7.29216e-05	0.000342439	6.97003e-05	0.000345536	7.04631e-05	0.00034788	7.10118e-05	0.000349794	7.14442e-05	0.0855486
48	0.280126	0.443411	0.82054	999557470	86586	0.00044253	8.66168e-05	0.00042497	8.25597e-05	0.000429048	8.35419e-05	0.000432081	8.4231e-05	0.00043453	8.47671e-05	0.0886143
49	0.280137	0.443384	0.819141	999455989	101481	0.000544011	0.000101526	0.000521401	9.6474e-05	0.000526733	9.77278e-05	0.000530622	9.85847e-05	0.000533729	9.92426e-05	0.0910759
50	0.28015	0.443351	0.818972	999336468	119521	0.000663532	0.000119586	0.000634592	0.000113253	0.000641535	0.000114865	0.000646501	0.000115942	0.00065042	0.000116755	0.0945088
51	0.280165	0.443313	0.819144	999196811	139657	0.000803189	0.00013975	0.000766363	0.000131859	0.000775364	0.000133918	0.000781683	0.000135271	0.000786599	0.000136269	0.0976966
52	0.280182	0.443269	0.819612	999034121	162690	0.000965879	0.000162821	0.000919241	0.000153	0.000930867	0.000155628	0.000938888	0.000157331	0.000945028	0.000158556	0.101049
53	0.280202	0.443217	0.817713	998843934	190187	0.00115607	0.000190371	0.00109716	0.00017809	0.00111215	0.000181454	0.00112232	0.000183613	0.00112998	0.000185127	0.10522
54	0.280225	0.443157	0.818965	998623989	219945	0.00137601	0.0002202	0.00130191	0.00020499	0.00132115	0.000209242	0.00133404	0.000211962	0.00134355	0.00021382	0.108701
55	0.280252	0.443088	0.818898	998368587	255402	0.00163141	0.000255754	0.00153841	0.000236824	0.00156302	0.000242209	0.00157936	0.000245657	0.00159117	0.000247961	0.113054
56	0.280283	0.443008	0.817011	998073645	294942	0.00192636	0.000295424	0.00180995	0.000271981	0.00184131	0.000278743	0.00186199	0.000283096	0.00187666	0.000285957	0.117217
57	0.280319	0.442914	0.817433	997731152	342493	0.00226885	0.000343154	0.00212329	0.000313948	0.00216315	0.000322457	0.00218936	0.000327995	0.00220761	0.000331585	0.122485
58	0.280361	0.442807	0.816648	997337198	393954	0.0026628	0.00039485	0.00248127	0.000358796	0.00253169	0.000369378	0.00256486	0.000376355	0.00258757	0.000380833	0.127051
59	0.280409	0.442683	0.818458	996881785	455413	0.00311822	0.000456629	0.00289208	0.0004119	0.00295564	0.00042509	0.00299761	0.000433907	0.00302595	0.000439546	0.132716
60	0.280464	0.44254	0.818136	996357120	524665	0.00364288	0.000526306	0.00336165	0.000471039	0.00344148	0.000487352	0.00349449	0.000498433	0.0035299	0.000505528	0.138432
61	0.280528	0.442376	0.816752	995755120	602000	0.00424488	0.000604201	0.00389592	0.000536231	0.0039957	0.000556255	0.0040625	0.000570085	0.00410678	0.000578988	0.144085
62	0.280602	0.442186	0.817612	995058692	696428	0.00494131	0.000699397	0.00450848	0.000615165	0.00463286	0.000639871	0.00471692	0.000657213	0.00477244	0.000668501	0.15149
63	0.280686	0.441968	0.817427	994260754	797938	0.00573925	0.0008019	0.00520357	0.000698543	0.00535794	0.000728679	0.00546338	0.00075017	0.00553301	0.000764339	0.158046
64	0.280783	0.441718	0.816724	993344715	916039	0.00665529	0.000921327	0.00599332	0.000794313	0.00618425	0.000831078	0.00631615	0.000857691	0.00640346	0.000875482	0.165521
65	0.280894	0.44143	0.816844	992292741	1051974	0.00770726	0.00105902	0.00689027	0.000902959	0.00712575	0.000947814	0.00729026	0.000980639	0.00739972	0.00100294	0.173741
66	0.281022	0.441099	0.816927	991086610	1206131	0.00891339	0.0012155	0.00790652	0.00102414	0.0081962	0.00107876	0.00840068	0.00111904	0.00853775	0.00114687	0.18243
67	0.281169	0.44072	0.816122	989703774	1382836	0.0102962	0.00139527	0.00905686	0.00116068	0.00941249	0.00122723	0.00966582	0.00127652	0.00983718	0.00131112	0.191932
68	0.281336	0.440287	0.816309	988124867	1578907	0.0118751	0.00159533	0.0103523	0.0013089	0.0107879	0.00138971	0.0111006	0.00144966	0.0113142	0.00149242	0.201514
69	0.281528	0.439789	0.815599	986317516	1807351	0.0136825	0.00182907	0.0118131	0.00147837	0.0123461	0.00157692	0.0127309	0.0016499	0.0129968	0.00170274	0.212565
70	0.281748	0.439221	0.815938	984256931	2060585	0.0157431	0.00208917	0.0134517	0.00166133	0.014103	0.0017813	0.0145751	0.00186979	0.0149048	0.00193454	0.223824
71	0.281998	0.43857	0.815586	981904687	2352244	0.0180953	0.00238987	0.0152893	0.00186702	0.0160849	0.00201363	0.0166627	0.00212102	0.0170704	0.00220022	0.236519
72	0.282284	0.437828	0.814398	979226494	2678193	0.0207735	0.00272755	0.0173413	0.00208978	0.0183128	0.00226895	0.0190183	0.00239906	0.0195207	0.00249541	0.249885
73	0.282608	0.436983	0.814426	976187373	3039121	0.0238126	0.00310359	0.0196205	0.00232762	0.0208063	0.00254636	0.0216658	0.00270357	0.0222823	0.0028202	0.263786
74	0.282978	0.43602	0.813739	972734425	3452948	0.0272656	0.00353718	0.0221502	0.00259135	0.0235972	0.00285896	0.0246427	0.00304954	0.025397	0.00319069	0.279532
75	0.283397	0.434924	0.813261	968825055	3909370	0.0311749	0.00401895	0.0249417	0.00286979	0.0267059	0.00319591	0.0279759	0.0034267	0.0288958	0.00359692	0.295988
76	0.283871	0.433682	0.812513	964409390	4415665	0.0355906	0.00455775	0.0280077	0.00316463	0.0301556	0.00356063	0.0316965	0.00384023	0.0328148	0.00404503	0.31356
77	0.284408	0.432273	0.811745	959429266	4980124	0.0405707	0.00516391	0.0313608	0.00347678	0.0339712	0.00395646	0.0358392	0.00429568	0.0371951	0.004542	0.332662
78	0.285013	0.430678	0.811015	953825544	5603722	0.0461745	0.00584068	0.0350075	0.00380097	0.0381739	0.00438037	0.0404368	0.00479202	0.0420766	0.00508788	0.353191
79	0.285695	0.428874	0.810379	947535881	6289663	0.0524641	0.00659414	0.0389496	0.00413295	0.0427817	0.0048309	0.0455205	0.00532978	0.0474991	0.00568508	0.375242
80	0.286461	0.426843	0.809144	940500772	7035109	0.0594992	0.00742464	0.0431793	0.00446391	0.0478052	0.00530167	0.0511149	0.00590414	0.0534975	0.0063305	0.398596
81	0.287318	0.424558	0.807859	932654668	7846104	0.0673453	0.00834247	0.0476844	0.00479004	0.0532531	0.00579251	0.0572445	0.00651735	0.0601084	0.00702912	0.42361
82	0.288274	0.421993	0.806332	923927860	8726808	0.0760721	0.00935696	0.0524448	0.00510417	0.0591287	0.0062999	0.0639308	0.00716907	0.0673679	0.00778372	0.45054
83	0.289338	0.419123	0.80493	914265027	9662833	0.085735	0.0104584	0.0574229	0.00538792	0.0654171	0.00680608	0.0711776	0.00784356	0.0752958	0.00858067	0.478748
84	0.290519	0.415916	0.80344	903600572	10664455	0.0963994	0.0116645	0.0625777	0.00563827	0.0721011	0.00731085	0.0789905	0.00854548	0.0839155	0.00942796	0.508932
85	0.291824	0.412345	0.801488	891873908	11726664	0.108126	0.0129777	0.0678583	0.00584393	0.0791515	0.00780259	0.0873641	0.00926693	0.0932407	0.01032	0.541061
86	0.29326	0.408377	0.799254	879033088	12840820	0.120967	0.0143976	0.0732025	0.00599213	0.0865244	0.00826673	0.09628	0.00999681	0.103272	0.0112477	0.575016
87	0.294834	0.403981	0.797016	865032585	14000503	0.134967	0.0159272	0.07854	0.00607199	0.0941616	0.00868819	0.105706	0.0107235	0.113999	0.012203	0.610858
88	0.296553	0.399124	0.794489	849832016	15200569	0.150168	0.0175723	0.0837944	0.0060742	0.101993	0.00905278	0.115598	0.0114356	0.125399	0.0131787	0.648765
89	0.298419	0.393778	0.791399	833414155	16417861	0.166586	0.0193189	0.0888806	0.00598491	0.109928	0.0093382	0.125889	0.0121083	0.137427	0.0141532	0.68821
90	0.300436	0.387909	0.788131	815759845	17654310	0.18424	0.0211831	0.0937179	0.00580428	0.117878	0.00953886	0.136503	0.0127359	0.150033	0.0151261	0.729783
91	0.302604	0.381492	0.784397	796882790	18877055	0.203117	0.0231405	0.0982255	0.00552559	0.125735	0.00963083	0.147342	0.0132867	0.16314	0.0160673	0.772675
92	0.304917	0.374501	0.780207	776803269	20079521	0.223197	0.0251976	0.102336	0.00515782	0.13339	0.0096062	0.158295	0.0137452	0.17666	0.0169652	0.817192
93	0.307367	0.366917	0.775624	755571045	21232224	0.244429	0.0273328	0.105994	0.00470999	0.140729	0.00944814	0.169233	0.0140812	0.190477	0.0177875	0.862719
94	0.309943	0.358723	0.770439	733247689	22323356	0.266752	0.029545	0.109169	0.0042016	0.147645	0.0091529	0.180024	0.0142812	0.204468	0.0185176	0.909346
95	0.312625	0.349909	0.764665	709912950	23334739	0.290087	0.0318238	0.111849	0.00365544	0.154039	0.00871988	0.190531	0.0143304	0.218498	0.0191334	0.956876
96	0.315391	0.340469	0.758169	685661713	24251237	0.314338	0.0341609	0.114047	0.00309634	0.159829	0.0081571	0.200624	0.0142174	0.232422	0.0196143	1.00519
97	0.31821	0.33041	0.751306	660629288	25032425	0.339371	0.0365084	0.115796	0.00254975	0.164953	0.00747309	0.210168	0.0139183	0.246077	0.0199152	1.05303
98	0.321038	0.319753	0.743403	634957209	25672079	0.365043	0.03886	0.117145	0.00204171	0.169377	0.00669636	0.219042	0.0134327	0.259303	0.0200197	1.10041
99	0.323833	0.308526	0.734556	608794849	26162360	0.391205	0.0412033	0.118154	0.00159024	0.173098	0.00585953	0.227147	0.0127646	0.271949	0.0199165	1.14714
100	0.326534	0.296771	0.724927	582316609	26478240	0.417683	0.0434929	0.118888	0.00120541	0.176139	0.00499581	0.234402	0.0119173	0.283872	0.0195851	1.19213
101	0.329076	0.284555	0.714062	555710850	26605759	0.444289	0.0456895	0.119406	0.000889575	0.178551	0.0041413	0.240755	0.01091	0.294945	0.0190155	1.23452
102	0.33138	0.271939	0.702177	529145239	26565611	0.470855	0.0478047	0.119761	0.00063891	0.180406	0.00333868	0.246193	0.00978539	0.305073	0.0182248	1.27479
103	0.333367	0.259015	0.688964	502808788	26336451	0.497191	0.0497717	0.119997	0.000444959	0.18179	0.002615	0.250731	0.00857666	0.314177	0.0172046	1.31134
104	0.334943	0.245883	0.674302	476875744	25933044	0.523124	0.0515764	0.120147	0.000299916	0.182791	0.00199059	0.254419	0.00733467	0.322211	0.0159781	1.34397
105	0.336014	0.232653	0.658287	451518376	25357368	0.548482	0.053174	0.120241	0.000195148	0.183493	0.00147372	0.257332	0.00610783	0.329159	0.0145699	1.37168
106	0.336486	0.21946	0.640649	426913950	24604426	0.573086	0.0544926	0.120296	0.000122064	0.183973	0.00106097	0.259562	0.00493921	0.335034	0.013012	1.39279
107	0.336273	0.206419	0.62148	403185735	23728215	0.596814	0.0555808	0.120327	7.30887e-05	0.18429	0.000742837	0.261219	0.00388176	0.339891	0.0113771	1.40868
108	0.335293	0.193667	0.600366	380460914	22724821	0.619539	0.0563632	0.120344	4.19906e-05	0.184493	0.000503887	0.262413	0.00296132	0.343807	0.0097125	1.41757
109	0.333483	0.181313	0.577947	358827774	21633140	0.641172	0.0568603	0.120352	2.27441e-05	0.184619	0.000330643	0.263248	0.00219453	0.346884	0.00808611	1.42009
110	0.330801	0.169477	0.553577	338363735	20464039	0.661636	0.0570303	0.120357	1.16912e-05	0.184694	0.000209301	0.263815	0.00158059	0.349234	0.00655078	1.41526
111	0.327243	0.158255	0.527691	319115641	19248094	0.680884	0.0568858	0.120359	5.68858e-06	0.184737	0.000127424	0.26419	0.00110757	0.350979	0.00515613	1.40349
112	0.322839	0.147717	0.500297	301088396	18027245	0.698912	0.0564913	0.120359	2.54211e-06	0.184761	7.4286e-05	0.264431	0.000755006	0.352238	0.00394535	1.38639
113	0.317657	0.137914	0.471908	284282742	16805654	0.715717	0.0558163	0.12036	1.11633e-06	0.184773	4.15832e-05	0.264581	0.000498998	0.353121	0.00293259	1.36324
114	0.311803	0.128876	0.442451	268660205	15622537	0.73134	0.0549542	0.12036	2.74771e-07	0.184779	2.19817e-05	0.264672	0.000319559	0.353724	0.00212096	1.33632
115	0.305413	0.120606	0.412707	254176869	14483336	0.745823	0.0539095	0.12036	0	0.184782	1.10514e-05	0.264725	0.000197848	0.354125	0.0014941	1.3057
116	0.298651	0.113091	0.382974	240770393	13406476	0.75923	0.0527447	0.12036	0	0.184784	5.27447e-06	0.264755	0.000118148	0.354386	0.00102694	1.27288
117	0.291708	0.106298	0.35394	228371494	12398899	0.771629	0.0514968	0.12036	0	0.184784	2.31735e-06	0.264771	6.77183e-05	0.354552	0.000688254	1.23868
118	0.28477	0.100187	0.32581	216905637	11465857	0.783094	0.050207	0.12036	0	0.184784	1.00414e-06	0.26478	3.74042e-05	0.354654	0.000448851	1.20406
119	0.278001	0.0947004	0.299033	206281062	10624575	0.793719	0.0489825	0.12036	0	0.184784	2.44912e-07	0.264784	1.9593e-05	0.354716	0.000284833	1.17151
120	0.271539	0.0897706	0.274422	196411994	9869068	0.803588	0.0478428	0.12036	0	0.184784	0	0.264786	9.80778e-06	0.354752	0.000175583	1.14145
