# Supplementary material for: Quantifying the Potential for Future Gene Therapy to Lower Lifetime Risk of Polygenic Late-Onset Diseases
Source: MDPI journal article supplement (doi:10.3390/ijms20133352), 2019-07-08
Supplement: s2 [file s2 › SuppFiles/Results/LODsRareMedium/CAD/-1.000/IndividualsByBetaDistrib.csv]

nEntry	Beta	nDetrimentalCount	nFractionPopulation	nCumulativeFractionPopulation	nEditsNeeded	nIndividuals
0	-19.8	0	0	1	0	0
1	-19.6	0	0	1	0	0
2	-19.4	0	0	1	0	0
3	-19.2	0	0	1	0	0
4	-19	0	0	1	0	0
5	-18.8	0	0	1	0	0
6	-18.6	0	0	1	0	0
7	-18.4	0	0	1	0	0
8	-18.2	0	0	1	0	0
9	-18	0	0	1	0	0
10	-17.8	0	0	1	0	0
11	-17.6	0	0	1	0	0
12	-17.4	0	0	1	0	0
13	-17.2	0	0	1	0	0
14	-17	0	0	1	0	0
15	-16.8	0	0	1	0	0
16	-16.6	0	0	1	0	0
17	-16.4	0	0	1	0	0
18	-16.2	0	0	1	0	0
19	-16	0	0	1	0	0
20	-15.8	0	0	1	0	0
21	-15.6	0	0	1	0	0
22	-15.4	0	0	1	0	0
23	-15.2	0	0	1	0	0
24	-15	0	0	1	0	0
25	-14.8	0	0	1	0	0
26	-14.6	0	0	1	0	0
27	-14.4	0	0	1	0	0
28	-14.2	0	0	1	0	0
29	-14	0	0	1	0	0
30	-13.8	0	0	1	0	0
31	-13.6	0	0	1	0	0
32	-13.4	0	0	1	0	0
33	-13.2	0	0	1	0	0
34	-13	0	0	1	0	0
35	-12.8	0	0	1	0	0
36	-12.6	0	0	1	0	0
37	-12.4	0	0	1	0	0
38	-12.2	0	0	1	0	0
39	-12	0	0	1	0	0
40	-11.8	0	0	1	0	0
41	-11.6	0	0	1	0	0
42	-11.4	0	0	1	0	0
43	-11.2	0	0	1	0	0
44	-11	0	0	1	0	0
45	-10.8	0	0	1	0	0
46	-10.6	0	0	1	0	0
47	-10.4	0	0	1	0	0
48	-10.2	0	0	1	0	0
49	-10	0	0	1	0	0
50	-9.8	0	0	1	0	0
51	-9.6	0	0	1	0	0
52	-9.4	0	0	1	0	0
53	-9.2	0	0	1	0	0
54	-9	0	0	1	0	0
55	-8.8	0	0	1	0	0
56	-8.6	0	0	1	0	0
57	-8.4	0	1.9e-08	1	0	19
58	-8.2	1	6.3e-08	0.99999998	0	63
59	-8	1.4398	2.66e-07	0.99999992	0	266
60	-7.8	1.6495	3.88e-07	0.99999965	0	388
61	-7.6	2.3972	1.546e-06	0.99999926	0	1546
62	-7.4	2.8824	3.972e-06	0.99999772	0	3972
63	-7.2	3.1604	5.429e-06	0.99999375	0	5429
64	-7	3.8	1.4366e-05	0.99998832	0	14366
65	-6.8	4.0691	2.2492e-05	0.99997395	0	22492
66	-6.6	4.5652	4.078e-05	0.99995146	0	40780
67	-6.4	4.9892	8.6233e-05	0.99991068	0	86233
68	-6.2	5.3247	0.000119873	0.99982445	0	119873
69	-6	5.8634	0.000206386	0.99970457	0	206386
70	-5.8	6.2008	0.000337641	0.99949819	0	337641
71	-5.6	6.5878	0.000473965	0.99916055	0	473965
72	-5.4	7.0877	0.000732454	0.99868658	0	732454
73	-5.2	7.4187	0.001046454	0.99795413	0	1046454
74	-5	7.8329	0.00140202	0.99690767	0	1402020
75	-4.8	8.2525	0.002015968	0.99550565	0	2015968
76	-4.6	8.5836	0.002704986	0.99348969	0	2704986
77	-4.4	9.0271	0.003522922	0.9907847	0	3522922
78	-4.2	9.4334	0.004643173	0.98726178	0	4643173
79	-4	9.7651	0.005853911	0.9826186	0	5853911
80	-3.8	10.204	0.007252543	0.97676469	0	7252543
81	-3.6	10.585	0.009053787	0.96951215	0	9053787
82	-3.4	10.948	0.010818826	0.96045836	0	10818826
83	-3.2	11.36	0.012896489	0.94963954	0	12896489
84	-3	11.751	0.015230071	0.93674305	0	15230071
85	-2.8	12.087	0.017290162	0.92151298	0	17290162
86	-2.6	12.505	0.020108947	0.90422282	0	20108947
87	-2.4	12.873	0.022757426	0.88411387	0	22757426
88	-2.2	13.248	0.025041563	0.86135644	0	25041563
89	-2	13.641	0.027622304	0.83631488	0	27622304
90	-1.8	14.01	0.030183349	0.80869258	0	30183349
91	-1.6	14.383	0.032222857	0.77850923	0	32222857
92	-1.4	14.781	0.033853915	0.74628637	0	33853915
93	-1.2	15.135	0.0359069	0.71243245	0	35906900
94	-1	15.512	0.03727495	0.67652555	0	37274950
95	-0.8	15.892	0.038225487	0.6392506	0	38225487
96	-0.6	16.259	0.038898566	0.60102512	0	38898566
97	-0.4	16.632	0.039059009	0.56212655	0	39059009
98	-0.2	17.01	0.039183403	0.52306754	0	39183403
99	0	17.37	0.03865205	0.48388414	0	38652050
100	0.2	17.746	0.037935664	0.44523209	0.37554	37935664
101	0.4	18.119	0.036746693	0.40729643	0.74865	36746693
102	0.6	18.488	0.035384402	0.37054973	1.1179	35384402
103	0.8	18.86	0.033655117	0.33516533	1.4891	33655117
104	1	19.23	0.031848044	0.30151021	1.8596	31848044
105	1.2	19.59	0.029755875	0.26966217	2.2199	29755875
106	1.4	19.958	0.027794537	0.23990629	2.588	27794537
107	1.6	20.328	0.025681002	0.21211176	2.9577	25681002
108	1.8	20.693	0.023566299	0.18643076	3.3229	23566299
109	2	21.06	0.021363576	0.16286446	3.6894	21363576
110	2.2	21.427	0.019289123	0.14150088	4.0569	19289123
111	2.4	21.795	0.017196663	0.12221176	4.4246	17196663
112	2.6	22.159	0.015341783	0.10501509	4.7887	15341783
113	2.8	22.521	0.013477396	0.089673311	5.1501	13477396
114	3	22.885	0.011857983	0.076195915	5.5145	11857983
115	3.2	23.252	0.01031721	0.064337932	5.8811	10317210
116	3.4	23.614	0.008926587	0.054020722	6.2432	8926587
117	3.6	23.981	0.007627218	0.045094135	6.6109	7627218
118	3.8	24.336	0.006523434	0.037466917	6.9659	6523434
119	4	24.705	0.005525624	0.030943483	7.3343	5525624
120	4.2	25.063	0.004654811	0.025417859	7.6927	4654811
121	4.4	25.428	0.003892091	0.020763048	8.0578	3892091
122	4.6	25.79	0.003236409	0.016870957	8.4197	3236409
123	4.8	26.157	0.002671484	0.013634548	8.7867	2671484
124	5	26.511	0.002198876	0.010963064	9.1405	2198876
125	5.2	26.872	0.001787068	0.008764188	9.5014	1787068
126	5.4	27.23	0.001455226	0.00697712	9.8598	1455226
127	5.6	27.594	0.001171394	0.005521894	10.224	1171394
128	5.8	27.956	0.000941035	0.0043505	10.586	941035
129	6	28.314	0.000753483	0.003409465	10.944	753483
130	6.2	28.674	0.000596947	0.002655982	11.303	596947
131	6.4	29.04	0.000469804	0.002059035	11.67	469804
132	6.6	29.391	0.000369296	0.001589231	12.02	369296
133	6.8	29.751	0.000287934	0.001219935	12.381	287934
134	7	30.106	0.000223229	0.000932001	12.735	223229
135	7.2	30.467	0.00017267	0.000708772	13.097	172670
136	7.4	30.83	0.000132285	0.000536102	13.46	132285
137	7.6	31.185	0.000101453	0.000403817	13.815	101453
138	7.8	31.542	7.6697e-05	0.000302364	14.172	76697
139	8	31.903	5.807e-05	0.000225667	14.532	58070
140	8.2	32.251	4.3495e-05	0.000167597	14.88	43495
141	8.4	32.628	3.2889e-05	0.000124102	15.257	32889
142	8.6	32.98	2.4586e-05	9.1213e-05	15.61	24586
143	8.8	33.342	1.8016e-05	6.6627e-05	15.972	18016
144	9	33.709	1.3497e-05	4.8611e-05	16.338	13497
145	9.2	34.049	9.774e-06	3.5114e-05	16.679	9774
146	9.4	34.395	7.228e-06	2.534e-05	17.025	7228
147	9.6	34.767	5.114e-06	1.8112e-05	17.397	5114
148	9.8	35.135	3.737e-06	1.2998e-05	17.765	3737
149	10	35.496	2.704e-06	9.261e-06	18.126	2704
150	10.2	35.803	1.94e-06	6.557e-06	18.432	1940
151	10.4	36.194	1.385e-06	4.617e-06	18.824	1385
152	10.6	36.542	1.001e-06	3.232e-06	19.172	1001
153	10.8	36.904	6.86e-07	2.231e-06	19.533	686
154	11	37.129	4.64e-07	1.545e-06	19.759	464
155	11.2	37.615	3.14e-07	1.081e-06	20.244	314
156	11.4	38	2.55e-07	7.67e-07	20.63	255
157	11.6	38.342	1.52e-07	5.12e-07	20.972	152
158	11.8	38.495	1.05e-07	3.6e-07	21.125	105
159	12	39.157	8.3e-08	2.55e-07	21.786	83
160	12.2	39.208	4.8e-08	1.72e-07	21.838	48
161	12.4	39.971	3.5e-08	1.24e-07	22.601	35
162	12.6	40.96	2.5e-08	8.9e-08	23.59	25
163	12.8	39.889	2.7e-08	6.4e-08	22.518	27
164	13	40.929	1.4e-08	3.7e-08	23.558	14
165	13.2	40.833	6e-09	2.3e-08	23.463	6
166	13.4	41.25	4e-09	1.7e-08	23.88	4
167	13.6	42	5e-09	1.3e-08	24.63	5
168	13.8	41.2	5e-09	8e-09	23.83	5
169	14	0	0	3e-09	0	0
170	14.2	0	0	3e-09	0	0
171	14.4	44	2e-09	3e-09	26.63	2
172	14.6	44	1e-09	1e-09	26.63	1
173	14.8	0	0	0	0	0
174	15	0	0	0	0	0
175	15.2	0	0	0	0	0
176	15.4	0	0	0	0	0
177	15.6	0	0	0	0	0
178	15.8	0	0	0	0	0
179	16	0	0	0	0	0
180	16.2	0	0	0	0	0
181	16.4	0	0	0	0	0
182	16.6	0	0	0	0	0
183	16.8	0	0	0	0	0
184	17	0	0	0	0	0
185	17.2	0	0	0	0	0
186	17.4	0	0	0	0	0
187	17.6	0	0	0	0	0
188	17.8	0	0	0	0	0
189	18	0	0	0	0	0
190	18.2	0	0	0	0	0
191	18.4	0	0	0	0	0
192	18.6	0	0	0	0	0
193	18.8	0	0	0	0	0
194	19	0	0	0	0	0
195	19.2	0	0	0	0	0
196	19.4	0	0	0	0	0
197	19.6	0	0	0	0	0
198	19.8	0	0	0	0	0
199	20	0	0	0	0	0
