# Supplementary material for: Quantifying the Potential for Future Gene Therapy to Lower Lifetime Risk of Polygenic Late-Onset Diseases
Source: MDPI journal article supplement (doi:10.3390/ijms20133352), 2019-07-08
Supplement: s2 [file s2 › SuppFiles/Results/LODsRareMedium/CAD/0.250/FrailtyAnalysis.csv]

Age	Heritability	MeanOR	CaseOR	nControls	nCases	nCumIncidence	nIncidence	nLifeIncidence0	nAbsIncidence0	nLifeIncidence5	nAbsIncidence5	nLifeIncidence10	nAbsIncidence10	nLifeIncidence15	nAbsIncidence15	nIncActDivExp
36	0.55774	0.249991	42.8545	999989845	10155	1.0155e-05	1.0155e-05	9.90209e-06	9.90209e-06	9.96007e-06	9.96007e-06	1.00094e-05	1.00094e-05	1.00508e-05	1.00508e-05	0.258095
37	0.557704	0.249963	41.7194	999967850	21995	3.215e-05	2.19952e-05	3.1321e-05	2.1419e-05	3.15095e-05	2.15494e-05	3.16689e-05	2.16595e-05	3.1805e-05	2.17542e-05	0.265253
38	0.557648	0.249919	38.015	999932333	35517	6.7667e-05	3.55181e-05	6.58597e-05	3.45387e-05	6.6268e-05	3.47585e-05	6.66103e-05	3.49414e-05	6.69059e-05	3.51009e-05	0.271227
39	0.55757	0.249856	35.9947	999881827	50506	0.000118173	5.05094e-05	0.000114903	4.90428e-05	0.000115638	4.93701e-05	0.000116249	4.96388e-05	0.000116778	4.98719e-05	0.274679
40	0.557468	0.249773	33.973	999813987	67840	0.000186013	6.7848e-05	0.000180675	6.57729e-05	0.000181872	6.62339e-05	0.000182857	6.66077e-05	0.000183706	6.69286e-05	0.280129
41	0.557343	0.249668	32.1494	999728047	85940	0.000271953	8.5956e-05	0.000263862	8.31861e-05	0.000265672	8.37997e-05	0.000267147	8.42904e-05	0.000268414	8.47081e-05	0.280501
42	0.55719	0.249539	30.5725	999620587	107460	0.000379413	0.000107489	0.000367699	0.000103837	0.000370317	0.000104646	0.00037243	0.000105283	0.000374235	0.000105821	0.284991
43	0.557007	0.249383	28.8263	999488807	131780	0.000511193	0.00013183	0.0004948	0.000127102	0.000498467	0.00012815	0.000501396	0.000128966	0.00050388	0.000129645	0.28972
44	0.556791	0.249197	27.6354	999330087	158720	0.000669913	0.000158801	0.000647583	0.000152782	0.000652589	0.000154122	0.000656546	0.00015515	0.000659874	0.000155995	0.293697
45	0.556543	0.248979	26.2476	999142380	187707	0.00085762	0.000187833	0.000827879	0.000180296	0.000834577	0.000181988	0.000839809	0.000183263	0.000844172	0.000184297	0.295831
46	0.556256	0.248724	25.0076	998920622	221758	0.00107938	0.000221948	0.00104038	0.000212504	0.00104923	0.000214652	0.00105604	0.000216235	0.00106167	0.000217501	0.300523
47	0.55593	0.248431	23.5378	998661513	259109	0.00133849	0.000259389	0.00128805	0.000247663	0.0012996	0.000250373	0.00130837	0.000252323	0.00131553	0.000253859	0.304304
48	0.55556	0.248094	22.4394	998361138	300375	0.00163886	0.000300778	0.00157435	0.000286305	0.00158931	0.000289712	0.00160047	0.000292101	0.00160949	0.00029396	0.307714
49	0.555145	0.24771	21.2286	998013886	347252	0.00198611	0.000347822	0.00190432	0.000329973	0.00192357	0.000334261	0.00193766	0.000337192	0.00194894	0.000339442	0.312021
50	0.55468	0.247276	20.0374	997615029	398857	0.00238497	0.000399651	0.00228206	0.000377734	0.00230668	0.00038311	0.00232436	0.000386704	0.00233835	0.000389414	0.315844
51	0.554159	0.246783	18.9735	997156809	458220	0.00284319	0.000459315	0.0027144	0.000432347	0.00274578	0.000439098	0.0027679	0.000443536	0.00278516	0.000446808	0.321099
52	0.553582	0.24623	17.9827	996635867	520942	0.00336413	0.000522427	0.00320393	0.000489521	0.00324371	0.000497929	0.00327128	0.000503378	0.00329246	0.000507299	0.324226
53	0.552945	0.245612	16.997	996044285	591582	0.00395572	0.000593579	0.00375734	0.000553419	0.00380759	0.000563872	0.00384186	0.000570581	0.00386774	0.000575287	0.328077
54	0.552241	0.244921	16.0532	995373715	670570	0.00462628	0.000673233	0.0043816	0.000624254	0.00444479	0.000637202	0.00448734	0.000645484	0.00451889	0.000651144	0.332338
55	0.551465	0.244152	15.1719	994615382	758333	0.00538462	0.000761858	0.0050838	0.000702205	0.00516296	0.000718172	0.00521574	0.000728394	0.00525411	0.000735227	0.336772
56	0.550615	0.243299	14.297	993760439	854943	0.00623956	0.000859571	0.0058709	0.000787099	0.00596963	0.000806669	0.006035	0.000819266	0.00608166	0.000827546	0.341058
57	0.549686	0.242354	13.4255	992797514	962925	0.00720249	0.000968971	0.00675187	0.00088097	0.00687447	0.000904846	0.00695539	0.000920388	0.00701212	0.00093046	0.345863
58	0.548669	0.241311	12.6748	991716736	1080778	0.00828326	0.00108862	0.00773396	0.000982092	0.00788553	0.00101106	0.00798555	0.00103015	0.00805453	0.00104241	0.350285
59	0.54756	0.240161	11.9199	990503831	1212905	0.00949617	0.00122304	0.00882806	0.00109409	0.00901466	0.00112913	0.0091381	0.00115255	0.00922206	0.00116753	0.355466
60	0.546354	0.2389	11.2281	989148610	1355221	0.0108514	0.00136821	0.010041	0.00121291	0.0102696	0.00125491	0.0104215	0.00128345	0.0105238	0.00130172	0.359874
61	0.545047	0.237518	10.5051	987634774	1513836	0.0123652	0.00153044	0.0113845	0.00134354	0.0116633	0.00139371	0.0118499	0.00142836	0.0119744	0.00145066	0.364967
62	0.543629	0.236008	9.86792	985946734	1688040	0.0140533	0.00170917	0.0128692	0.00148474	0.0132077	0.00154437	0.0134361	0.00158623	0.0135879	0.00161347	0.370209
63	0.542099	0.234362	9.25488	984070581	1876153	0.0159294	0.00190289	0.0145036	0.00163434	0.0149125	0.00170484	0.0151913	0.00175512	0.0153762	0.00178827	0.37504
64	0.540449	0.232574	8.63794	981985694	2084887	0.0180143	0.00211864	0.016301	0.00179746	0.0167932	0.00188066	0.0171321	0.00194088	0.0173573	0.00198114	0.380624
65	0.538675	0.230638	8.07319	979676940	2308754	0.0203231	0.00235111	0.0182696	0.00196852	0.0188595	0.00206631	0.01927	0.00213787	0.0195438	0.00218648	0.385717
66	0.53677	0.228546	7.55039	977124549	2552391	0.0228755	0.00260534	0.0204201	0.00215057	0.0211247	0.00226526	0.0216199	0.00234985	0.0219521	0.00240827	0.391026
67	0.534729	0.226293	7.04513	974308283	2816266	0.0256917	0.0028822	0.0227629	0.00234275	0.0236018	0.00247709	0.0241964	0.00257657	0.0245985	0.0026464	0.396471
68	0.532546	0.223871	6.57753	971207070	3101213	0.0287929	0.00318299	0.0253073	0.00254441	0.0263033	0.0027015	0.0270145	0.00281804	0.0274996	0.00290115	0.402059
69	0.530216	0.221277	6.12582	967798246	3408824	0.0322018	0.00350988	0.0280625	0.00275522	0.0292422	0.00293888	0.0300894	0.00307491	0.030673	0.00317338	0.407901
70	0.527743	0.218513	5.6941	964067577	3730669	0.0359324	0.0038548	0.0310292	0.00296667	0.0324231	0.0031809	0.0334283	0.00333891	0.0341276	0.00345454	0.412985
71	0.525115	0.215571	5.29758	959985803	4081774	0.0400142	0.00423391	0.034218	0.00318878	0.0358623	0.00343918	0.0370509	0.00362259	0.0378854	0.00375786	0.419019
72	0.522335	0.212455	4.90658	955534250	4451553	0.0444657	0.0046371	0.0376286	0.00341067	0.0395654	0.00370309	0.0409663	0.00391543	0.0419581	0.00407268	0.424829
73	0.519396	0.209162	4.55899	950690029	4844221	0.04931	0.00506965	0.0412617	0.00363304	0.0435398	0.00397447	0.0451862	0.00421985	0.04636	0.0044019	0.430888
74	0.516301	0.205696	4.22134	945433277	5256752	0.0545667	0.00552941	0.0451128	0.00385112	0.0477887	0.00424882	0.0497182	0.00453206	0.0511018	0.00474183	0.436972
75	0.513047	0.202062	3.9088	939744873	5688404	0.0602551	0.00601672	0.0491747	0.00406189	0.0523121	0.00452348	0.0545684	0.00485013	0.0561929	0.00509106	0.44312
76	0.509639	0.198269	3.61773	933611848	6133025	0.0663882	0.00652627	0.0534331	0.0042584	0.0571034	0.00479127	0.0597359	0.0051675	0.061636	0.00544309	0.448988
77	0.506079	0.194323	3.34058	927013320	6598528	0.0729867	0.00706774	0.0578758	0.00444269	0.062159	0.00505563	0.0652249	0.00548908	0.0674398	0.00580383	0.455308
78	0.502369	0.190238	3.08925	919947385	7065935	0.0800526	0.00762226	0.0624741	0.00459833	0.0674583	0.00529927	0.0710222	0.00579728	0.073595	0.00615521	0.460925
79	0.498517	0.186022	2.8504	912394215	7553170	0.0876058	0.00821044	0.0672081	0.00473402	0.0729918	0.00553349	0.0771271	0.00610493	0.0801069	0.00651189	0.467217
80	0.494526	0.181691	2.62979	904350071	8044144	0.0956499	0.00881652	0.0720445	0.00483638	0.0787358	0.00574404	0.0835239	0.00639678	0.0869656	0.00685872	0.47332
81	0.490405	0.177258	2.42516	895812292	8537779	0.104188	0.00944079	0.0769467	0.00490218	0.084664	0.00592812	0.0901939	0.00666993	0.0941593	0.00719368	0.479379
82	0.486162	0.172741	2.23629	886782663	9029629	0.113217	0.0100798	0.0818723	0.00492562	0.0907435	0.00607951	0.0971121	0.00691828	0.101671	0.00751143	0.485346
83	0.481809	0.168158	2.05945	877264200	9518463	0.122736	0.0107337	0.086776	0.00490367	0.0969378	0.00619438	0.104251	0.00713861	0.10948	0.00780947	0.491349
84	0.477353	0.163525	1.89793	867267558	9996642	0.132732	0.0113952	0.0916081	0.00483208	0.103203	0.0062655	0.111574	0.00732359	0.11756	0.00807989	0.497184
85	0.472808	0.158862	1.74844	856806425	10461133	0.143194	0.0120622	0.0963188	0.0047107	0.109493	0.00628955	0.119044	0.00746993	0.125879	0.0083188	0.502891
86	0.468174	0.154177	1.61171	845878661	10927764	0.154121	0.0127541	0.100867	0.00454803	0.115767	0.00627445	0.126632	0.00758758	0.134416	0.00853704	0.509377
87	0.463472	0.1495	1.48596	834529927	11348734	0.16547	0.0134165	0.105193	0.00432653	0.121958	0.00619068	0.134273	0.00764093	0.143111	0.00869512	0.514566
88	0.458711	0.144836	1.36924	822757283	11772644	0.177243	0.0141069	0.109263	0.00406945	0.128023	0.00606497	0.141934	0.00766134	0.15194	0.00882919	0.520825
89	0.453904	0.140209	1.26314	810604352	12152931	0.189396	0.014771	0.113028	0.00376492	0.133897	0.00587436	0.149551	0.00761697	0.160844	0.0089033	0.526195
90	0.449062	0.13563	1.16553	798092028	12512324	0.201908	0.0154358	0.116456	0.00342844	0.139532	0.00563436	0.157074	0.00752278	0.169778	0.00893461	0.531781
91	0.4442	0.131117	1.0758	785261195	12830833	0.214739	0.0160769	0.11952	0.00306381	0.144872	0.00534006	0.164441	0.00736714	0.178687	0.00890896	0.536818
92	0.439322	0.126677	0.994185	772129941	13131254	0.22787	0.0167221	0.122208	0.0026879	0.149878	0.00500609	0.171604	0.00716303	0.187528	0.00884108	0.542322
93	0.434438	0.12232	0.919164	758731677	13398264	0.241268	0.0173523	0.124517	0.00230879	0.154509	0.00463138	0.178507	0.00690245	0.196247	0.00871926	0.547701
94	0.429562	0.118058	0.85055	745102942	13628735	0.254897	0.0179625	0.126455	0.00193814	0.158731	0.00422211	0.185094	0.00658772	0.204789	0.00854195	0.552856
95	0.424708	0.113901	0.787424	731289782	13813160	0.26871	0.0185386	0.128041	0.00158665	0.162516	0.00378487	0.191314	0.00622014	0.213094	0.00830489	0.557417
96	0.419877	0.109854	0.730455	717323391	13966391	0.282677	0.0190983	0.129307	0.00126591	0.165851	0.00333496	0.197127	0.00581267	0.221113	0.00801915	0.56197
97	0.415079	0.105918	0.67725	703219222	14104169	0.296781	0.0196622	0.130292	0.000985035	0.168738	0.00288705	0.202504	0.005377	0.228807	0.00769375	0.567127
98	0.410323	0.1021	0.629003	689018972	14200250	0.310981	0.0201932	0.131038	0.000746081	0.171185	0.00244699	0.207413	0.0049086	0.236123	0.00731561	0.571814
99	0.405611	0.0984048	0.58492	674768840	14250132	0.325231	0.0206818	0.131588	0.000549984	0.173212	0.00202651	0.211827	0.00441462	0.243011	0.00688809	0.575798
100	0.400953	0.0948315	0.544505	660488755	14280085	0.339511	0.0211629	0.131984	0.000395773	0.174852	0.00164028	0.21574	0.00391281	0.249441	0.00643039	0.580072
101	0.396353	0.0913826	0.507159	646211041	14277714	0.353789	0.0216169	0.132262	0.000277987	0.176146	0.00129413	0.219149	0.0034093	0.255384	0.00594224	0.584082
102	0.391809	0.0880544	0.473499	631958760	14252281	0.368041	0.0220551	0.132453	0.000190482	0.177142	0.000995379	0.222067	0.00291737	0.260817	0.00543347	0.588137
103	0.387329	0.084848	0.442028	617756223	14202537	0.382244	0.0224738	0.13258	0.000126971	0.177888	0.000746201	0.224514	0.00244738	0.265726	0.00490939	0.592121
104	0.382914	0.081761	0.413151	603623795	14132428	0.396376	0.022877	0.132662	8.21801e-05	0.178433	0.000545441	0.226524	0.00200977	0.270105	0.00437816	0.596128
105	0.378568	0.0787913	0.386794	589587881	14035914	0.410412	0.0232528	0.132713	5.15118e-05	0.178822	0.000389005	0.228136	0.00161224	0.27395	0.00384591	0.599832
106	0.374296	0.0759393	0.362393	575678512	13909369	0.424321	0.0235917	0.132745	3.1157e-05	0.179093	0.000270815	0.229397	0.00126075	0.277272	0.00332135	0.602985
107	0.370094	0.0731984	0.339908	561896799	13781713	0.438103	0.0239399	0.132763	1.8123e-05	0.179277	0.000184193	0.230359	0.000962515	0.280093	0.00282105	0.606753
108	0.365964	0.0705666	0.319265	548266181	13630618	0.451734	0.0242582	0.132773	1.01548e-05	0.179399	0.000121858	0.231076	0.000716153	0.282442	0.00234883	0.610111
109	0.361903	0.0680407	0.300072	534798631	13467550	0.465201	0.0245639	0.132778	5.38702e-06	0.179477	7.83138e-05	0.231595	0.00051978	0.284357	0.00191522	0.613483
110	0.357924	0.0656198	0.282188	521516094	13282537	0.478484	0.0248365	0.132781	2.72292e-06	0.179526	4.87469e-05	0.231963	0.000368126	0.285883	0.0015257	0.616342
111	0.354019	0.0632983	0.265876	508427623	13088471	0.491572	0.025097	0.132782	1.30885e-06	0.179555	2.93182e-05	0.232218	0.000254833	0.287069	0.00118634	0.619192
112	0.350187	0.0610723	0.250682	495537825	12889798	0.504462	0.0253523	0.132783	5.80041e-07	0.179572	1.69501e-05	0.232391	0.000172272	0.287969	0.000900223	0.622188
113	0.34643	0.0589383	0.236671	482859995	12677830	0.51714	0.025584	0.132783	2.53557e-07	0.179582	9.44498e-06	0.232504	0.00011334	0.288635	0.000666093	0.624856
114	0.342739	0.0568917	0.22362	470392441	12467554	0.529608	0.0258202	0.132783	6.23378e-08	0.179587	4.98702e-06	0.232576	7.24988e-05	0.289116	0.000481185	0.627869
115	0.339119	0.0549294	0.211481	458144949	12247492	0.541855	0.0260368	0.132783	0	0.179589	2.51074e-06	0.232621	4.49483e-05	0.289456	0.000339439	0.630618
116	0.335573	0.0530492	0.200152	446127470	12017479	0.553873	0.0262307	0.132783	0	0.179591	1.20175e-06	0.232648	2.69192e-05	0.28969	0.00023398	0.633021
117	0.332092	0.0512459	0.189608	434335137	11792333	0.565665	0.0264327	0.132783	0	0.179591	5.30655e-07	0.232664	1.55069e-05	0.289847	0.000157605	0.635801
118	0.328676	0.0495167	0.179914	422779202	11555935	0.577221	0.026606	0.132783	0	0.179591	2.31119e-07	0.232672	8.60917e-06	0.289951	0.00010331	0.638064
119	0.325329	0.0478594	0.170636	411458032	11321170	0.588542	0.026778	0.132783	0	0.179591	5.66059e-08	0.232677	4.52847e-06	0.290017	6.58326e-05	0.640449
120	0.322051	0.0462708	0.162065	400377371	11080661	0.599623	0.0269302	0.132783	0	0.179591	0	0.232679	2.27154e-06	0.290057	4.0666e-05	0.642509
