# Supplementary material for: Quantifying the Potential for Future Gene Therapy to Lower Lifetime Risk of Polygenic Late-Onset Diseases
Source: MDPI journal article supplement (doi:10.3390/ijms20133352), 2019-07-08
Supplement: s2 [file s2 › SuppFiles/Results/LODsRareMedium/CAD/0.250/IndividualsByBetaDistrib.csv]

nEntry	Beta	nDetrimentalCount	nFractionPopulation	nCumulativeFractionPopulation	nEditsNeeded	nIndividuals
0	-19.8	0	0	1	0	0
1	-19.6	0	0	1	0	0
2	-19.4	0	0	1	0	0
3	-19.2	0	0	1	0	0
4	-19	0	0	1	0	0
5	-18.8	0	0	1	0	0
6	-18.6	0	0	1	0	0
7	-18.4	0	0	1	0	0
8	-18.2	0	0	1	0	0
9	-18	0	0	1	0	0
10	-17.8	0	0	1	0	0
11	-17.6	0	0	1	0	0
12	-17.4	0	0	1	0	0
13	-17.2	0	0	1	0	0
14	-17	0	0	1	0	0
15	-16.8	0	0	1	0	0
16	-16.6	0	0	1	0	0
17	-16.4	0	0	1	0	0
18	-16.2	0	0	1	0	0
19	-16	0	0	1	0	0
20	-15.8	0	0	1	0	0
21	-15.6	0	0	1	0	0
22	-15.4	0	0	1	0	0
23	-15.2	0	0	1	0	0
24	-15	0	0	1	0	0
25	-14.8	0	0	1	0	0
26	-14.6	0	0	1	0	0
27	-14.4	0	0	1	0	0
28	-14.2	0	0	1	0	0
29	-14	0	0	1	0	0
30	-13.8	0	0	1	0	0
31	-13.6	0	0	1	0	0
32	-13.4	0	0	1	0	0
33	-13.2	0	0	1	0	0
34	-13	0	0	1	0	0
35	-12.8	0	0	1	0	0
36	-12.6	0	0	1	0	0
37	-12.4	0	0	1	0	0
38	-12.2	0	0	1	0	0
39	-12	0	0	1	0	0
40	-11.8	0	0	1	0	0
41	-11.6	0	0	1	0	0
42	-11.4	0	0	1	0	0
43	-11.2	0	0	1	0	0
44	-11	0	0	1	0	0
45	-10.8	0	0	1	0	0
46	-10.6	0	0	1	0	0
47	-10.4	0	0	1	0	0
48	-10.2	0	0	1	0	0
49	-10	0	0	1	0	0
50	-9.8	0	0	1	0	0
51	-9.6	0	0	1	0	0
52	-9.4	0	0	1	0	0
53	-9.2	0	0	1	0	0
54	-9	0	0	1	0	0
55	-8.8	0	0	1	0	0
56	-8.6	0	0	1	0	0
57	-8.4	0	1.2e-08	1	0	12
58	-8.2	1	6.7e-08	0.99999999	0	67
59	-8	1.4604	2.65e-07	0.99999992	0	265
60	-7.8	1.6202	3.87e-07	0.99999966	0	387
61	-7.6	2.4114	1.422e-06	0.99999927	0	1422
62	-7.4	2.8891	3.994e-06	0.99999785	0	3994
63	-7.2	3.1638	5.482e-06	0.99999385	0	5482
64	-7	3.7928	1.4179e-05	0.99998837	0	14179
65	-6.8	4.0604	2.2693e-05	0.99997419	0	22693
66	-6.6	4.5757	4.1244e-05	0.9999515	0	41244
67	-6.4	4.9818	8.6145e-05	0.99991025	0	86145
68	-6.2	5.3257	0.000120079	0.99982411	0	120079
69	-6	5.8592	0.000207107	0.99970403	0	207107
70	-5.8	6.1995	0.000338979	0.99949692	0	338979
71	-5.6	6.5881	0.000473643	0.99915794	0	473643
72	-5.4	7.0889	0.000733677	0.9986843	0	733677
73	-5.2	7.4189	0.001045528	0.99795062	0	1045528
74	-5	7.8324	0.001403178	0.9969051	0	1403178
75	-4.8	8.2518	0.002013412	0.99550192	0	2013412
76	-4.6	8.5829	0.002701132	0.99348851	0	2701132
77	-4.4	9.0269	0.003521314	0.99078738	0	3521314
78	-4.2	9.4336	0.004646443	0.98726606	0	4646443
79	-4	9.7651	0.005854908	0.98261962	0	5854908
80	-3.8	10.204	0.007254964	0.97676471	0	7254964
81	-3.6	10.585	0.009049754	0.96950975	0	9049754
82	-3.4	10.948	0.010810956	0.96045999	0	10810956
83	-3.2	11.36	0.012898665	0.94964904	0	12898665
84	-3	11.751	0.015220553	0.93675037	0	15220553
85	-2.8	12.087	0.017288076	0.92152982	0	17288076
86	-2.6	12.504	0.020102186	0.90424174	0	20102186
87	-2.4	12.873	0.022750806	0.88413956	0	22750806
88	-2.2	13.248	0.025042023	0.86138875	0	25042023
89	-2	13.641	0.027625271	0.83634673	0	27625271
90	-1.8	14.01	0.030193338	0.80872146	0	30193338
91	-1.6	14.382	0.032213615	0.77852812	0	32213615
92	-1.4	14.781	0.033853441	0.7463145	0	33853441
93	-1.2	15.135	0.035914543	0.71246106	0	35914543
94	-1	15.513	0.037272563	0.67654652	0	37272563
95	-0.8	15.892	0.038208481	0.63927396	0	38208481
96	-0.6	16.26	0.038903563	0.60106547	0	38903563
97	-0.4	16.632	0.039051633	0.56216191	0	39051633
98	-0.2	17.01	0.039182221	0.52311028	0	39182221
99	0	17.371	0.038650232	0.48392806	0	38650232
100	0.2	17.746	0.03794879	0.44527783	0.37492	37948790
101	0.4	18.119	0.036742053	0.40732904	0.74784	36742053
102	0.6	18.489	0.035380857	0.37058698	1.1173	35380857
103	0.8	18.859	0.033655575	0.33520613	1.4875	33655575
104	1	19.23	0.031853714	0.30155055	1.8584	31853714
105	1.2	19.59	0.029751486	0.26969684	2.219	29751486
106	1.4	19.959	0.027785617	0.23994535	2.5875	27785617
107	1.6	20.328	0.02568156	0.21215973	2.957	25681560
108	1.8	20.693	0.023583919	0.18647817	3.3217	23583919
109	2	21.06	0.021365342	0.16289425	3.689	21365342
110	2.2	21.427	0.019290187	0.14152891	4.0561	19290187
111	2.4	21.795	0.017198711	0.12223873	4.4241	17198711
112	2.6	22.159	0.015336418	0.10504002	4.7882	15336418
113	2.8	22.521	0.013486452	0.089703597	5.1494	13486452
114	3	22.885	0.011858442	0.076217145	5.5138	11858442
115	3.2	23.252	0.010316066	0.064358703	5.8803	10316066
116	3.4	23.614	0.008929173	0.054042637	6.2426	8929173
117	3.6	23.982	0.007632271	0.045113464	6.6108	7632271
118	3.8	24.336	0.006527084	0.037481193	6.9649	6527084
119	4	24.705	0.005524841	0.030954109	7.3336	5524841
120	4.2	25.065	0.004660506	0.025429268	7.6933	4660506
121	4.4	25.428	0.00388934	0.020768762	8.0573	3889340
122	4.6	25.791	0.003239038	0.016879422	8.4197	3239038
123	4.8	26.157	0.002670215	0.013640384	8.7854	2670215
124	5	26.51	0.002202654	0.010970169	9.1389	2202654
125	5.2	26.873	0.001787473	0.008767515	9.5019	1787473
126	5.4	27.231	0.00145625	0.006980042	9.8594	1456250
127	5.6	27.596	0.00117522	0.005523792	10.225	1175220
128	5.8	27.954	0.000941788	0.004348572	10.583	941788
129	6	28.313	0.000753567	0.003406784	10.942	753567
130	6.2	28.677	0.000595859	0.002653217	11.305	595859
131	6.4	29.041	0.000469077	0.002057358	11.67	469077
132	6.6	29.39	0.000367686	0.001588281	12.018	367686
133	6.8	29.757	0.000288976	0.001220595	12.386	288976
134	7	30.112	0.000223461	0.000931619	12.741	223461
135	7.2	30.483	0.000172103	0.000708158	13.112	172103
136	7.4	30.838	0.00013247	0.000536055	13.467	132470
137	7.6	31.181	0.000101068	0.000403585	13.81	101068
138	7.8	31.541	7.671e-05	0.000302517	14.169	76710
139	8	31.905	5.8164e-05	0.000225807	14.533	58164
140	8.2	32.24	4.3979e-05	0.000167643	14.869	43979
141	8.4	32.61	3.2976e-05	0.000123664	15.239	32976
142	8.6	32.984	2.4233e-05	9.0688e-05	15.613	24233
143	8.8	33.333	1.81e-05	6.6455e-05	15.962	18100
144	9	33.69	1.3242e-05	4.8355e-05	16.318	13242
145	9.2	34.039	9.686e-06	3.5113e-05	16.668	9686
146	9.4	34.382	7.194e-06	2.5427e-05	17.01	7194
147	9.6	34.782	5.153e-06	1.8233e-05	17.411	5153
148	9.8	35.106	3.728e-06	1.308e-05	17.735	3728
149	10	35.438	2.68e-06	9.352e-06	18.067	2680
150	10.2	35.798	1.868e-06	6.672e-06	18.427	1868
151	10.4	36.092	1.389e-06	4.804e-06	18.721	1389
152	10.6	36.49	9.7e-07	3.415e-06	19.118	970
153	10.8	36.9	7.48e-07	2.445e-06	19.529	748
154	11	37.251	5.3e-07	1.697e-06	19.88	530
155	11.2	37.703	3.64e-07	1.167e-06	20.332	364
156	11.4	37.84	2.44e-07	8.03e-07	20.469	244
157	11.6	38.341	1.73e-07	5.59e-07	20.97	173
158	11.8	38.54	1.26e-07	3.86e-07	21.168	126
159	12	38.473	9.1e-08	2.6e-07	21.101	91
160	12.2	39.217	4.6e-08	1.69e-07	21.846	46
161	12.4	39.476	4.2e-08	1.23e-07	22.105	42
162	12.6	40.038	2.6e-08	8.1e-08	22.667	26
163	12.8	40.857	2.1e-08	5.5e-08	23.486	21
164	13	40.556	1.8e-08	3.4e-08	23.184	18
165	13.2	41.778	9e-09	1.6e-08	24.407	9
166	13.4	42	1e-09	7e-09	24.629	1
167	13.6	41.667	3e-09	6e-09	24.295	3
168	13.8	42.5	2e-09	3e-09	25.129	2
169	14	0	0	1e-09	0	0
170	14.2	0	0	1e-09	0	0
171	14.4	41	1e-09	1e-09	23.629	1
172	14.6	0	0	0	0	0
173	14.8	0	0	0	0	0
174	15	0	0	0	0	0
175	15.2	0	0	0	0	0
176	15.4	0	0	0	0	0
177	15.6	0	0	0	0	0
178	15.8	0	0	0	0	0
179	16	0	0	0	0	0
180	16.2	0	0	0	0	0
181	16.4	0	0	0	0	0
182	16.6	0	0	0	0	0
183	16.8	0	0	0	0	0
184	17	0	0	0	0	0
185	17.2	0	0	0	0	0
186	17.4	0	0	0	0	0
187	17.6	0	0	0	0	0
188	17.8	0	0	0	0	0
189	18	0	0	0	0	0
190	18.2	0	0	0	0	0
191	18.4	0	0	0	0	0
192	18.6	0	0	0	0	0
193	18.8	0	0	0	0	0
194	19	0	0	0	0	0
195	19.2	0	0	0	0	0
196	19.4	0	0	0	0	0
197	19.6	0	0	0	0	0
198	19.8	0	0	0	0	0
199	20	0	0	0	0	0
