# Supplementary material for: Quantifying the Potential for Future Gene Therapy to Lower Lifetime Risk of Polygenic Late-Onset Diseases
Source: MDPI journal article supplement (doi:10.3390/ijms20133352), 2019-07-08
Supplement: s2 [file s2 › SuppFiles/Results/LODsRareMedium/CAD/1.000/FrailtyAnalysis.csv]

Age	Heritability	MeanOR	CaseOR	nControls	nCases	nCumIncidence	nIncidence	nLifeIncidence0	nAbsIncidence0	nLifeIncidence5	nAbsIncidence5	nLifeIncidence10	nAbsIncidence10	nLifeIncidence15	nAbsIncidence15	nIncActDivExp
36	0.55767	0.999935	153.239	999960971	39029	3.9029e-05	3.9029e-05	3.8057e-05	3.8057e-05	3.82798e-05	3.82798e-05	3.84695e-05	3.84695e-05	3.86286e-05	3.86286e-05	0.991942
37	0.557547	0.999528	132.945	999877691	83280	0.000122309	8.32833e-05	0.000119156	8.11021e-05	0.000119873	8.15959e-05	0.000120479	8.20128e-05	0.000120997	8.23713e-05	1.00436
38	0.557362	0.998902	120.073	999746840	130851	0.00025316	0.000130867	0.000246403	0.000127262	0.000247929	0.000128072	0.00024921	0.000128746	0.000250315	0.000129334	0.999339
39	0.557116	0.998043	107.789	999563151	183689	0.000436849	0.000183736	0.00042477	0.000178413	0.000427487	0.000179603	0.000429745	0.000180581	0.000431698	0.000181429	0.999184
40	0.556803	0.996927	99.2723	999320221	242930	0.000679779	0.000243036	0.000660298	0.000235631	0.000664666	0.000237282	0.000668262	0.000238621	0.000671364	0.000239771	1.00344
41	0.556423	0.995547	92.7428	999014744	305477	0.000985256	0.000305685	0.000955986	0.000295889	0.000962535	0.000298072	0.000967875	0.000299817	0.000972462	0.000301303	0.997544
42	0.555972	0.993876	85.5805	998638095	376649	0.00136191	0.00037702	0.00131994	0.000364309	0.00132932	0.000367146	0.00133689	0.000369382	0.00134336	0.000371269	0.99961
43	0.555449	0.991898	79.3298	998184258	453837	0.00181574	0.000454456	0.00175766	0.000438323	0.00177066	0.000441938	0.00178104	0.000444751	0.00178985	0.000447091	0.998749
44	0.554847	0.989588	73.8382	997644391	539867	0.00235561	0.000540849	0.00227733	0.000520616	0.00229488	0.000525181	0.00230876	0.000528685	0.00232045	0.000531563	1.00028
45	0.554164	0.986921	68.3646	997009183	635208	0.00299082	0.000636708	0.00288746	0.000611571	0.00291074	0.000617307	0.00292893	0.000621634	0.00294411	0.000625142	1.0028
46	0.553399	0.983885	63.6202	996272453	736730	0.00372755	0.00073894	0.00359345	0.000708104	0.00362386	0.000715261	0.00364732	0.000720537	0.0036667	0.000724756	1.00054
47	0.552545	0.980447	59.5276	995423129	849324	0.00457687	0.000852502	0.00440525	0.000814842	0.00444455	0.00082376	0.0044744	0.000830175	0.00449882	0.00083523	1.00012
48	0.5516	0.976589	55.2834	994450735	972394	0.00554927	0.000976865	0.0053321	0.000931109	0.00538242	0.000942186	0.00542	0.000949957	0.00545045	0.000956004	0.999392
49	0.55056	0.972278	51.4721	993342235	1108500	0.00665777	0.00111469	0.00638544	0.00105922	0.00644945	0.00107299	0.00649639	0.00108239	0.00653402	0.00108962	0.999951
50	0.54942	0.967492	47.9497	992086356	1255879	0.00791364	0.0012643	0.00757481	0.00119734	0.00765575	0.00121438	0.007714	0.00122577	0.00776016	0.00123436	0.999173
51	0.548175	0.962202	44.6636	990669059	1417297	0.00933094	0.0014286	0.00891208	0.00134794	0.0090139	0.00136899	0.00908588	0.00138282	0.00914216	0.00139302	0.998711
52	0.54682	0.956377	41.5168	989073828	1595231	0.0109262	0.00161026	0.0104111	0.00151313	0.0105387	0.00153912	0.0106273	0.00155597	0.0106956	0.00156808	0.999347
53	0.54535	0.949991	38.7774	987287340	1786488	0.0127127	0.00180622	0.0120823	0.0016897	0.0122415	0.00172162	0.0123504	0.0017421	0.0124329	0.00175647	0.998317
54	0.543758	0.943006	36.0903	985288038	1999302	0.014712	0.00202505	0.0139435	0.00188518	0.0141413	0.00192428	0.0142749	0.00194929	0.0143743	0.00196638	0.999655
55	0.542041	0.935406	33.5906	983061817	2226221	0.0169382	0.00225946	0.016005	0.00209223	0.0162496	0.0021398	0.0164132	0.00217026	0.0165327	0.00219062	0.998774
56	0.540193	0.927157	31.2319	980586018	2475799	0.019414	0.00251846	0.0182843	0.0023186	0.0185856	0.00237625	0.0187857	0.00241336	0.0189291	0.00243775	0.999265
57	0.538211	0.91824	29.0055	977841161	2744857	0.0221588	0.0027992	0.0207956	0.00256096	0.0211649	0.00263037	0.0214093	0.00267555	0.0215814	0.00270483	0.999143
58	0.536088	0.908628	26.9284	974804997	3036164	0.025195	0.00310497	0.0235545	0.00282145	0.0240052	0.00290467	0.0243033	0.00295953	0.0245098	0.00299474	0.999086
59	0.533818	0.898294	24.9851	971452206	3352791	0.0285478	0.00343945	0.0265789	0.00310254	0.0271264	0.00320189	0.0274892	0.0032683	0.0277372	0.00331078	0.999648
60	0.531396	0.887227	23.1977	967762435	3689771	0.0322376	0.0037982	0.0298812	0.00339935	0.0305431	0.00351708	0.0309836	0.00359705	0.0312813	0.00364825	0.999021
61	0.528818	0.8754	21.5023	963705444	4056991	0.0362946	0.00419214	0.0334818	0.00372054	0.0342781	0.00385947	0.0348115	0.00395543	0.035169	0.0040172	0.999704
62	0.526074	0.862797	19.9456	959255393	4450051	0.0407446	0.00461765	0.0373959	0.00406152	0.0383495	0.00422464	0.0389932	0.00433913	0.0394224	0.00441366	1.00019
63	0.523169	0.849438	18.4352	954391258	4864135	0.0456087	0.00507074	0.0416331	0.00441717	0.0427694	0.00460773	0.0435435	0.00474363	0.0440587	0.00483323	0.999388
64	0.520091	0.835293	17.0501	949077671	5313587	0.0509223	0.00556751	0.0462141	0.00479998	0.0475625	0.00502215	0.0484901	0.00518297	0.0491079	0.00529047	1.00023
65	0.516842	0.820378	15.7357	943289158	5788513	0.0567108	0.00609909	0.0511496	0.0052003	0.0527432	0.00545863	0.0538502	0.00564767	0.0545899	0.00577609	1.0006
66	0.513413	0.804702	14.5434	937001361	6287797	0.0629986	0.00666582	0.0564475	0.00561642	0.0583237	0.00591595	0.059639	0.00613686	0.0605226	0.00628944	1.00045
67	0.509807	0.788289	13.4073	930187250	6814111	0.0698128	0.00727225	0.062116	0.00604953	0.0643171	0.00639642	0.0658731	0.00665331	0.0669258	0.00683363	1.00036
68	0.506027	0.771176	12.3425	922824652	7362598	0.0771753	0.00791518	0.0681566	0.00649405	0.0707307	0.00689499	0.0725635	0.00719244	0.0738134	0.00740457	0.999805
69	0.502065	0.753371	11.3613	914880466	7944186	0.0851195	0.00860855	0.0745776	0.00695795	0.0775797	0.00742178	0.0797295	0.0077653	0.0812089	0.00801396	1.00044
70	0.497924	0.734929	10.4526	906339345	8541121	0.0936607	0.00933578	0.0813696	0.0074239	0.0848622	0.00796001	0.0873737	0.00835543	0.0891178	0.00864479	1.00019
71	0.493607	0.715903	9.60963	897185542	9153803	0.102814	0.0100998	0.0885208	0.00789018	0.0925749	0.00850975	0.0954977	0.00896358	0.0975452	0.00929829	0.999546
72	0.489111	0.696321	8.82473	887387561	9797981	0.112612	0.0109208	0.0960277	0.00836724	0.100726	0.00908463	0.104116	0.00960555	0.106509	0.00999133	1.00051
73	0.484447	0.676279	8.08784	876943544	10444017	0.123056	0.0117694	0.10386	0.00882675	0.109294	0.00965626	0.113214	0.0102524	0.116	0.0106947	1.00032
74	0.479614	0.655829	7.42034	865844624	11098920	0.134155	0.0126564	0.111992	0.00927212	0.118265	0.0102296	0.122782	0.0109116	0.126011	0.0114166	1.00019
75	0.474623	0.635046	6.7968	854082280	11762344	0.145918	0.0135848	0.120391	0.00970045	0.127619	0.0108028	0.132811	0.0115829	0.136539	0.0121583	1.0005
76	0.469486	0.614024	6.21328	841659514	12422766	0.15834	0.0145452	0.129016	0.0100993	0.137324	0.011363	0.143278	0.0122553	0.147564	0.0129089	1.00067
77	0.4642	0.592821	5.69413	828585883	13073631	0.171414	0.0155332	0.137819	0.0104582	0.14734	0.0119011	0.154154	0.0129215	0.159063	0.0136624	1.00066
78	0.458788	0.571547	5.20409	814876815	13709068	0.185123	0.0165451	0.14674	0.0107672	0.157622	0.0124084	0.165402	0.0135745	0.171005	0.0144126	1.0005
79	0.453259	0.550282	4.75467	800549292	14327523	0.199451	0.0175824	0.15572	0.01102	0.168118	0.012881	0.176982	0.0142112	0.183357	0.0151585	1.00053
80	0.447628	0.529107	4.34346	785627327	14921965	0.214373	0.0186397	0.164692	0.0112067	0.178774	0.0133099	0.188848	0.0148224	0.19608	0.0158928	1.00068
81	0.441903	0.50811	3.96933	770151614	15475713	0.229848	0.0196985	0.173577	0.0113104	0.189519	0.0136775	0.200938	0.015389	0.20912	0.0165974	1.00024
82	0.436101	0.487361	3.62517	754150277	16001337	0.24585	0.0207769	0.182306	0.0113337	0.200292	0.0139888	0.213198	0.0159187	0.222431	0.0172835	1.00041
83	0.430243	0.466956	3.30857	737677022	16473255	0.262323	0.0218435	0.190793	0.0112532	0.211013	0.0142152	0.225552	0.0163821	0.235946	0.0179216	0.999913
84	0.42434	0.44694	3.02333	720771395	16905627	0.279229	0.0229174	0.198964	0.0110776	0.221609	0.0143637	0.237938	0.0167894	0.24961	0.0185232	0.999905
85	0.418403	0.427361	2.76283	703472036	17299359	0.296528	0.0240012	0.206754	0.0108078	0.232009	0.0144302	0.25029	0.0171384	0.263367	0.019086	1.00065
86	0.412455	0.408303	2.52456	685857107	17614929	0.314143	0.02504	0.214085	0.0104214	0.242123	0.0143773	0.262521	0.0173863	0.277128	0.0195619	1.00006
87	0.406501	0.389795	2.30925	667972656	17884451	0.332027	0.0260761	0.220904	0.00994111	0.251879	0.0142244	0.274563	0.0175566	0.290831	0.0199788	1.0001
88	0.400562	0.371873	2.11263	649873704	18098952	0.350126	0.0270953	0.22716	0.00936605	0.261203	0.0139588	0.286341	0.017633	0.304405	0.0203208	1.00036
89	0.394654	0.354579	1.93339	631627683	18246021	0.368372	0.0280763	0.232812	0.00869788	0.270023	0.0135712	0.297777	0.0175971	0.317772	0.0205688	1.00018
90	0.388783	0.33792	1.77225	613286802	18340881	0.386713	0.0290375	0.237838	0.00795642	0.278282	0.0130757	0.308804	0.0174582	0.330868	0.0207347	1.00037
91	0.382965	0.321924	1.62552	594920200	18366602	0.40508	0.0299478	0.242224	0.00715109	0.285926	0.012464	0.319349	0.0171953	0.343621	0.020794	0.999978
92	0.377205	0.306587	1.49243	576571145	18349055	0.423429	0.0308429	0.245979	0.00631338	0.292921	0.0117584	0.329359	0.0168246	0.355975	0.0207661	1.00028
93	0.37152	0.29192	1.37099	558298264	18272881	0.441702	0.0316923	0.249128	0.00546122	0.299238	0.0109551	0.338773	0.0163271	0.367867	0.0206246	1.00032
94	0.365915	0.277918	1.26101	540151731	18146533	0.459848	0.0325033	0.251709	0.00462229	0.304859	0.0100694	0.347544	0.0157111	0.37924	0.0203718	1.0004
95	0.360402	0.264576	1.16133	522186543	17965188	0.477813	0.0332595	0.253772	0.00382035	0.309782	0.00911328	0.355634	0.0149769	0.390041	0.0199966	1.00004
96	0.354982	0.251878	1.07099	504443148	17743395	0.495557	0.033979	0.255381	0.00307986	0.314019	0.00811368	0.363018	0.0141417	0.400229	0.0195099	0.999837
97	0.349662	0.239805	0.988558	486948929	17494219	0.513051	0.0346803	0.256603	0.00242207	0.3176	0.00709888	0.369688	0.0132213	0.409772	0.0189179	1.0003
98	0.344447	0.228346	0.9136	469753940	17194989	0.530246	0.0353117	0.257506	0.00185528	0.320563	0.00608491	0.375632	0.0122062	0.418631	0.0181917	0.999926
99	0.339338	0.217478	0.845427	452881229	16872711	0.547119	0.0359182	0.258157	0.00138626	0.322962	0.00510793	0.380859	0.0111273	0.426786	0.0173618	0.999992
100	0.334348	0.207179	0.78325	436359816	16521413	0.56364	0.0364807	0.258615	0.00101106	0.32486	0.00419035	0.385386	0.00999589	0.434226	0.0164274	0.999928
101	0.329467	0.197424	0.72695	420215412	16144404	0.579785	0.0369979	0.258929	0.000720349	0.326323	0.00335349	0.389241	0.00883455	0.440945	0.0153982	0.999672
102	0.324692	0.188187	0.675702	404464034	15751378	0.595536	0.0374841	0.25914	0.000500974	0.327423	0.00261789	0.392465	0.0076728	0.44695	0.0142902	0.999574
103	0.320027	0.17944	0.628677	389109073	15354961	0.610891	0.0379637	0.259277	0.000339396	0.32823	0.00199461	0.395111	0.00654191	0.452258	0.0131229	1.00023
104	0.315474	0.171165	0.585558	374173281	14935792	0.625827	0.0383846	0.259364	0.000223206	0.328807	0.00148145	0.397235	0.00545867	0.456885	0.0118914	1.00022
105	0.311033	0.163338	0.546001	359659727	14513554	0.64034	0.0387883	0.259417	0.000142353	0.329209	0.00107502	0.398902	0.00445542	0.460862	0.0106282	1.00059
106	0.306705	0.155938	0.509848	345584144	14075583	0.654416	0.0391358	0.259449	8.76643e-05	0.329483	0.000761975	0.400178	0.00354727	0.464223	0.00934505	1.00028
107	0.302485	0.148938	0.476956	331946662	13637482	0.668053	0.0394621	0.259467	5.18927e-05	0.329665	0.000527411	0.40113	0.00275603	0.467014	0.0080777	1.00016
108	0.298368	0.142313	0.446499	318736794	13209868	0.681263	0.0397952	0.259477	2.96474e-05	0.329783	0.000355769	0.401824	0.00209084	0.469291	0.0068575	1.00088
109	0.294356	0.136047	0.418537	305965904	12770890	0.694034	0.0400672	0.259482	1.60269e-05	0.329858	0.000232991	0.402317	0.00154639	0.471107	0.00569796	1.00068
110	0.290453	0.130128	0.392571	293641067	12324837	0.706359	0.0402817	0.259484	8.25776e-06	0.329903	0.000147834	0.402659	0.00111641	0.472523	0.00462696	0.99963
111	0.286647	0.124524	0.36881	281736620	11904447	0.718263	0.0405408	0.259485	4.05408e-06	0.329929	9.08114e-05	0.402891	0.00078933	0.473602	0.00367462	1.00022
112	0.282944	0.119224	0.346858	270259974	11476646	0.72974	0.0407354	0.259486	1.83309e-06	0.329945	5.3567e-05	0.403044	0.000544428	0.474403	0.00284496	0.999715
113	0.27933	0.114202	0.326735	259197123	11062851	0.740803	0.0409341	0.259486	8.18682e-07	0.329953	3.04959e-05	0.403143	0.000365951	0.474984	0.00215068	0.999764
114	0.275809	0.109443	0.307909	248529871	10667252	0.75147	0.041155	0.259486	2.05775e-07	0.329957	1.6462e-05	0.403205	0.000239316	0.475396	0.00158838	1.00076
115	0.272367	0.10493	0.29086	238265257	10264614	0.761735	0.0413013	0.259486	0	0.329959	8.46677e-06	0.403243	0.000151576	0.47568	0.00114467	1.00033
116	0.269019	0.100656	0.274566	228390825	9874432	0.771609	0.041443	0.259486	0	0.32996	4.1443e-06	0.403265	9.28324e-05	0.475873	0.000806896	1.00014
117	0.26575	0.0965988	0.259736	218891714	9499111	0.781108	0.0415915	0.259486	0	0.329961	1.87162e-06	0.403277	5.46928e-05	0.476	0.00055587	1.00043
118	0.262564	0.0927534	0.245714	209764800	9126914	0.790235	0.041696	0.259486	0	0.329961	8.3392e-07	0.403284	3.10635e-05	0.476081	0.000372762	0.99995
119	0.259459	0.0891031	0.232783	200994516	8770284	0.799005	0.0418101	0.259486	0	0.329961	2.0905e-07	0.403288	1.6724e-05	0.476132	0.000243126	0.999972
120	0.256429	0.0856343	0.220807	192568531	8425985	0.807431	0.0419215	0.259486	0	0.329961	0	0.403289	8.5939e-06	0.476163	0.000153852	1.00017
