# Supplementary material for: Quantifying the Potential for Future Gene Therapy to Lower Lifetime Risk of Polygenic Late-Onset Diseases
Source: MDPI journal article supplement (doi:10.3390/ijms20133352), 2019-07-08
Supplement: s2 [file s2 › SuppFiles/Results/LODsRareMedium/CAD/1.000/IndividualsByBetaDistrib.csv]

nEntry	Beta	nDetrimentalCount	nFractionPopulation	nCumulativeFractionPopulation	nEditsNeeded	nIndividuals
0	-19.8	0	0	1	0	0
1	-19.6	0	0	1	0	0
2	-19.4	0	0	1	0	0
3	-19.2	0	0	1	0	0
4	-19	0	0	1	0	0
5	-18.8	0	0	1	0	0
6	-18.6	0	0	1	0	0
7	-18.4	0	0	1	0	0
8	-18.2	0	0	1	0	0
9	-18	0	0	1	0	0
10	-17.8	0	0	1	0	0
11	-17.6	0	0	1	0	0
12	-17.4	0	0	1	0	0
13	-17.2	0	0	1	0	0
14	-17	0	0	1	0	0
15	-16.8	0	0	1	0	0
16	-16.6	0	0	1	0	0
17	-16.4	0	0	1	0	0
18	-16.2	0	0	1	0	0
19	-16	0	0	1	0	0
20	-15.8	0	0	1	0	0
21	-15.6	0	0	1	0	0
22	-15.4	0	0	1	0	0
23	-15.2	0	0	1	0	0
24	-15	0	0	1	0	0
25	-14.8	0	0	1	0	0
26	-14.6	0	0	1	0	0
27	-14.4	0	0	1	0	0
28	-14.2	0	0	1	0	0
29	-14	0	0	1	0	0
30	-13.8	0	0	1	0	0
31	-13.6	0	0	1	0	0
32	-13.4	0	0	1	0	0
33	-13.2	0	0	1	0	0
34	-13	0	0	1	0	0
35	-12.8	0	0	1	0	0
36	-12.6	0	0	1	0	0
37	-12.4	0	0	1	0	0
38	-12.2	0	0	1	0	0
39	-12	0	0	1	0	0
40	-11.8	0	0	1	0	0
41	-11.6	0	0	1	0	0
42	-11.4	0	0	1	0	0
43	-11.2	0	0	1	0	0
44	-11	0	0	1	0	0
45	-10.8	0	0	1	0	0
46	-10.6	0	0	1	0	0
47	-10.4	0	0	1	0	0
48	-10.2	0	0	1	0	0
49	-10	0	0	1	0	0
50	-9.8	0	0	1	0	0
51	-9.6	0	0	1	0	0
52	-9.4	0	0	1	0	0
53	-9.2	0	0	1	0	0
54	-9	0	0	1	0	0
55	-8.8	0	0	1	0	0
56	-8.6	0	0	1	0	0
57	-8.4	0	1.7e-08	1	0	17
58	-8.2	1	5.8e-08	0.99999998	0	58
59	-8	1.4481	2.7e-07	0.99999993	0	270
60	-7.8	1.642	4.05e-07	0.99999965	0	405
61	-7.6	2.3896	1.476e-06	0.99999925	0	1476
62	-7.4	2.8931	4.097e-06	0.99999777	0	4097
63	-7.2	3.175	5.353e-06	0.99999368	0	5353
64	-7	3.808	1.4314e-05	0.99998832	0	14314
65	-6.8	4.0524	2.2657e-05	0.99997401	0	22657
66	-6.6	4.5795	4.054e-05	0.99995135	0	40540
67	-6.4	4.9853	8.6418e-05	0.99991081	0	86418
68	-6.2	5.329	0.000119537	0.99982439	0	119537
69	-6	5.8629	0.000207453	0.99970486	0	207453
70	-5.8	6.1991	0.000338993	0.9994974	0	338993
71	-5.6	6.5897	0.000473086	0.99915841	0	473086
72	-5.4	7.0874	0.000729746	0.99868533	0	729746
73	-5.2	7.4197	0.001044741	0.99795558	0	1044741
74	-5	7.8332	0.001404221	0.99691084	0	1404221
75	-4.8	8.2532	0.002013552	0.99550662	0	2013552
76	-4.6	8.5833	0.002700902	0.99349307	0	2700902
77	-4.4	9.0264	0.003520811	0.99079216	0	3520811
78	-4.2	9.4336	0.004639867	0.98727135	0	4639867
79	-4	9.7657	0.005853614	0.98263149	0	5853614
80	-3.8	10.204	0.007249149	0.97677787	0	7249149
81	-3.6	10.585	0.009052369	0.96952872	0	9052369
82	-3.4	10.948	0.010811071	0.96047635	0	10811071
83	-3.2	11.36	0.012895124	0.94966528	0	12895124
84	-3	11.751	0.015232927	0.93677016	0	15232927
85	-2.8	12.087	0.01728095	0.92153723	0	17280950
86	-2.6	12.504	0.020105037	0.90425628	0	20105037
87	-2.4	12.873	0.022750859	0.88415124	0	22750859
88	-2.2	13.248	0.025040847	0.86140039	0	25040847
89	-2	13.641	0.027621314	0.83635954	0	27621314
90	-1.8	14.01	0.03018255	0.80873823	0	30182550
91	-1.6	14.382	0.032217681	0.77855568	0	32217681
92	-1.4	14.781	0.033846728	0.74633799	0	33846728
93	-1.2	15.135	0.035900764	0.71249127	0	35900764
94	-1	15.512	0.037271789	0.6765905	0	37271789
95	-0.8	15.891	0.038208358	0.63931871	0	38208358
96	-0.6	16.259	0.038905559	0.60111035	0	38905559
97	-0.4	16.632	0.039060433	0.5622048	0	39060433
98	-0.2	17.01	0.039183092	0.52314436	0	39183092
99	0	17.37	0.038650704	0.48396127	0	38650704
100	0.2	17.747	0.037944533	0.44531057	0.37611	37944533
101	0.4	18.119	0.036742816	0.40736603	0.74873	36742816
102	0.6	18.489	0.035391868	0.37062322	1.1183	35391868
103	0.8	18.859	0.03366676	0.33523135	1.4885	33666760
104	1	19.23	0.03185839	0.30156459	1.8593	31858390
105	1.2	19.591	0.029756587	0.2697062	2.2204	29756587
106	1.4	19.959	0.027799628	0.23994961	2.5885	27799628
107	1.6	20.329	0.025689669	0.21214999	2.9581	25689669
108	1.8	20.693	0.023582598	0.18646032	3.3225	23582598
109	2	21.061	0.021357264	0.16287772	3.6901	21357264
110	2.2	21.427	0.019293438	0.14152045	4.0569	19293438
111	2.4	21.796	0.017199482	0.12222702	4.4251	17199482
112	2.6	22.159	0.015336586	0.10502753	4.7889	15336586
113	2.8	22.521	0.013478577	0.089690948	5.1502	13478577
114	3	22.884	0.011859577	0.076212371	5.514	11859577
115	3.2	23.251	0.010318161	0.064352794	5.8806	10318161
116	3.4	23.614	0.008921943	0.054034633	6.2437	8921943
117	3.6	23.981	0.007631831	0.04511269	6.611	7631831
118	3.8	24.337	0.006527724	0.037480859	6.9662	6527724
119	4	24.705	0.00552633	0.030953135	7.3346	5526330
120	4.2	25.064	0.00465725	0.025426805	7.6931	4657250
121	4.4	25.428	0.003893326	0.020769555	8.0575	3893326
122	4.6	25.79	0.003238382	0.016876229	8.4195	3238382
123	4.8	26.158	0.002671625	0.013637847	8.7871	2671625
124	5	26.512	0.002199399	0.010966222	9.1416	2199399
125	5.2	26.874	0.001785586	0.008766823	9.5037	1785586
126	5.4	27.231	0.001457086	0.006981237	9.861	1457086
127	5.6	27.595	0.001175204	0.005524151	10.224	1175204
128	5.8	27.956	0.000941424	0.004348947	10.586	941424
129	6	28.315	0.000752062	0.003407523	10.945	752062
130	6.2	28.676	0.000596347	0.002655461	11.306	596347
131	6.4	29.039	0.000468896	0.002059114	11.669	468896
132	6.6	29.39	0.000368555	0.001590218	12.02	368555
133	6.8	29.754	0.000288196	0.001221663	12.383	288196
134	7	30.11	0.00022357	0.000933467	12.74	223570
135	7.2	30.465	0.000173381	0.000709897	13.095	173381
136	7.4	30.831	0.000132125	0.000536516	13.46	132125
137	7.6	31.191	0.000101499	0.000404391	13.82	101499
138	7.8	31.537	7.6716e-05	0.000302892	14.167	76716
139	8	31.911	5.8257e-05	0.000226176	14.54	58257
140	8.2	32.262	4.3895e-05	0.000167919	14.891	43895
141	8.4	32.607	3.2993e-05	0.000124024	15.237	32993
142	8.6	33	2.462e-05	9.1031e-05	15.63	24620
143	8.8	33.333	1.7951e-05	6.6411e-05	15.963	17951
144	9	33.7	1.3272e-05	4.846e-05	16.329	13272
145	9.2	34.059	9.667e-06	3.5188e-05	16.688	9667
146	9.4	34.402	7.186e-06	2.5521e-05	17.031	7186
147	9.6	34.72	5.243e-06	1.8335e-05	17.35	5243
148	9.8	35.132	3.845e-06	1.3092e-05	17.761	3845
149	10	35.508	2.728e-06	9.247e-06	18.137	2728
150	10.2	35.795	1.956e-06	6.519e-06	18.425	1956
151	10.4	36.195	1.396e-06	4.563e-06	18.824	1396
152	10.6	36.516	9.47e-07	3.167e-06	19.146	947
153	10.8	36.853	6.73e-07	2.22e-06	19.482	673
154	11	37.235	5.28e-07	1.547e-06	19.864	528
155	11.2	37.84	3.37e-07	1.019e-06	20.469	337
156	11.4	37.866	2.02e-07	6.82e-07	20.496	202
157	11.6	38.296	1.35e-07	4.8e-07	20.926	135
158	11.8	38.791	1.15e-07	3.45e-07	21.421	115
159	12	39	8.4e-08	2.3e-07	21.63	84
160	12.2	39.864	4.4e-08	1.46e-07	22.493	44
161	12.4	40.029	3.4e-08	1.02e-07	22.659	34
162	12.6	40.208	2.4e-08	6.8e-08	22.838	24
163	12.8	40.917	1.2e-08	4.4e-08	23.546	12
164	13	40.615	1.3e-08	3.2e-08	23.245	13
165	13.2	41.556	9e-09	1.9e-08	24.185	9
166	13.4	41.25	4e-09	1e-08	23.88	4
167	13.6	42	1e-09	6e-09	24.63	1
168	13.8	42	3e-09	5e-09	24.63	3
169	14	0	0	2e-09	0	0
170	14.2	41	1e-09	2e-09	23.63	1
171	14.4	45	1e-09	1e-09	27.63	1
172	14.6	0	0	0	0	0
173	14.8	0	0	0	0	0
174	15	0	0	0	0	0
175	15.2	0	0	0	0	0
176	15.4	0	0	0	0	0
177	15.6	0	0	0	0	0
178	15.8	0	0	0	0	0
179	16	0	0	0	0	0
180	16.2	0	0	0	0	0
181	16.4	0	0	0	0	0
182	16.6	0	0	0	0	0
183	16.8	0	0	0	0	0
184	17	0	0	0	0	0
185	17.2	0	0	0	0	0
186	17.4	0	0	0	0	0
187	17.6	0	0	0	0	0
188	17.8	0	0	0	0	0
189	18	0	0	0	0	0
190	18.2	0	0	0	0	0
191	18.4	0	0	0	0	0
192	18.6	0	0	0	0	0
193	18.8	0	0	0	0	0
194	19	0	0	0	0	0
195	19.2	0	0	0	0	0
196	19.4	0	0	0	0	0
197	19.6	0	0	0	0	0
198	19.8	0	0	0	0	0
199	20	0	0	0	0	0
