# Supplementary material for: Quantifying the Potential for Future Gene Therapy to Lower Lifetime Risk of Polygenic Late-Onset Diseases
Source: MDPI journal article supplement (doi:10.3390/ijms20133352), 2019-07-08
Supplement: s2 [file s2 › SuppFiles/Results/LODsRareMedium/CAD/EnvironmentArray.csv]

Age	Env	Incidence	CasesExpected
0	0	-0.00036862	0
1	0	-0.000367254	0
2	0	-0.000365745	0
3	0	-0.000364079	0
4	0	-0.000362238	0
5	0	-0.000360205	0
6	0	-0.000357959	0
7	0	-0.000355479	0
8	0	-0.00035274	0
9	0	-0.000349714	0
10	0	-0.000346373	0
11	0	-0.000342682	0
12	0	-0.000338606	0
13	0	-0.000334105	0
14	0	-0.000329134	0
15	0	-0.000323643	0
16	0	-0.000317581	0
17	0	-0.000310885	0
18	0	-0.000303492	0
19	0	-0.000295328	0
20	0	-0.000286314	0
21	0	-0.000276361	0
22	0	-0.000265372	0
23	0	-0.00025324	0
24	0	-0.000239846	0
25	0	-0.000225061	0
26	0	-0.000208741	0
27	0	-0.000190727	0
28	0	-0.000170847	0
29	0	-0.000148908	0
30	0	-0.0001247	0
31	0	-9.799e-05	0
32	0	-6.85246e-05	0
33	0	-3.60234e-05	0
34	0	-1.79013e-07	0
35	3.6186373e-06	3.9346e-05	983
36	7.9401832e-06	8.29217e-05	2072
37	1.2972311e-05	0.000130954	3273
38	1.8790138e-05	0.000183885	4595
39	2.5525841e-05	0.000242203	6052
40	3.3268471e-05	0.000306437	7655
41	4.21741e-05	0.000377168	9419
42	5.2440817e-05	0.000455025	11360
43	6.4243081e-05	0.000540698	13492
44	7.7776961e-05	0.000634933	15835
45	9.3322112e-05	0.000738541	18408
46	0.00011117646	0.0008524	21230
47	0.00013165485	0.000977459	24324
48	0.00015518865	0.00111474	27713
49	0.00018218722	0.00126534	31422
50	0.00021313056	0.00143045	35478
51	0.00024863846	0.00161131	39906
52	0.00028941059	0.00180927	44737
53	0.00033611893	0.00202575	49999
54	0.00038992778	0.00226224	55723
55	0.00045161987	0.00252031	61939
56	0.00052245528	0.0028016	68679
57	0.00060367044	0.00310781	75972
58	0.00069664547	0.00344066	83848
59	0.00080322346	0.00380192	92333
60	0.00092554991	0.00419338	101452
61	0.0010657257	0.00461678	111227
62	0.0012259116	0.00507384	121675
63	0.0014094296	0.00556622	132804
64	0.0016197993	0.00609542	144621
65	0.001859685	0.00666283	157119
66	0.0021334487	0.00726962	170287
67	0.0024450079	0.00791672	184097
68	0.0028003156	0.00860475	198513
69	0.0032033579	0.009334	213483
70	0.0036624401	0.0101043	228946
71	0.0041826753	0.0109152	244821
72	0.0047715209	0.0117656	261012
73	0.0054365222	0.0126539	277414
74	0.0061858883	0.0135781	293911
75	0.0070282415	0.0145355	310362
76	0.0079743594	0.015523	326624
77	0.0090317487	0.0165369	342559
78	0.010214361	0.0175731	358002
79	0.011528444	0.018627	372802
80	0.012986611	0.0196938	386810
81	0.014601966	0.0207683	399879
82	0.016381772	0.0218454	411887
83	0.018342794	0.0229196	422696
84	0.020497518	0.0239857	432214
85	0.022850417	0.0250386	440366
86	0.025416758	0.0260734	447094
87	0.028209997	0.0270857	452350
88	0.03123429	0.0280713	456116
89	0.034510253	0.0290266	458396
90	0.038035821	0.0299485	459225
91	0.041819857	0.0308344	458648
92	0.045873416	0.0316822	456734
93	0.050209967	0.0324904	453544
94	0.054820392	0.033258	449165
95	0.059734752	0.0339846	443715
96	0.064952759	0.0346699	437277
97	0.070464735	0.0353143	429951
98	0.076291255	0.0359185	421858
99	0.082425422	0.0364833	413097
100	0.088866502	0.03701	403765
101	0.095645439	0.0375	393980
102	0.10279364	0.0379548	383808
103	0.11024496	0.0383761	373347
104	0.11804899	0.0387655	362650
105	0.1261839	0.0391248	351825
106	0.13466397	0.0394558	340924
107	0.14351672	0.0397604	329991
108	0.15269203	0.0400401	319105
109	0.1621852	0.0402967	308299
110	0.1720683	0.0405318	297609
111	0.18233994	0.040747	287070
112	0.19296762	0.0409438	276713
113	0.20405616	0.0411236	266543
114	0.21551877	0.0412877	256603
115	0.22735175	0.0414374	246906
116	0.23953806	0.0415738	237444
117	0.25212391	0.0416981	228254
118	0.26509795	0.0418112	219336
119	0.27853611	0.0419142	210688
