# Supplementary material for: Quantifying the Potential for Future Gene Therapy to Lower Lifetime Risk of Polygenic Late-Onset Diseases
Source: MDPI journal article supplement (doi:10.3390/ijms20133352), 2019-07-08
Supplement: s2 [file s2 › SuppFiles/Results/LODsRareMedium/CAD/EnvironmentArraySD.csv]

Age	Env	EnvSD	Incidence	CasesExpected
0	0	0	-0.00036862	0
1	0	0	-0.000367254	0
2	0	0	-0.000365745	0
3	0	0	-0.000364079	0
4	0	0	-0.000362238	0
5	0	0	-0.000360205	0
6	0	0	-0.000357959	0
7	0	0	-0.000355479	0
8	0	0	-0.00035274	0
9	0	0	-0.000349714	0
10	0	0	-0.000346373	0
11	0	0	-0.000342682	0
12	0	0	-0.000338606	0
13	0	0	-0.000334105	0
14	0	0	-0.000329134	0
15	0	0	-0.000323643	0
16	0	0	-0.000317581	0
17	0	0	-0.000310885	0
18	0	0	-0.000303492	0
19	0	0	-0.000295328	0
20	0	0	-0.000286314	0
21	0	0	-0.000276361	0
22	0	0	-0.000265372	0
23	0	0	-0.00025324	0
24	0	0	-0.000239846	0
25	0	0	-0.000225061	0
26	0	0	-0.000208741	0
27	0	0	-0.000190727	0
28	0	0	-0.000170847	0
29	0	0	-0.000148908	0
30	0	0	-0.0001247	0
31	0	0	-9.799e-05	0
32	0	0	-6.85246e-05	0
33	0	0	-3.60234e-05	0
34	0	0	-1.79013e-07	0
35	3.6186373e-06	6.137e-09	3.9346e-05	983
36	7.9401832e-06	7.267e-09	8.29217e-05	2072
37	1.2972311e-05	1.124e-08	0.000130954	3273
38	1.8790138e-05	1.731e-08	0.000183885	4595
39	2.5525841e-05	1.83e-08	0.000242203	6052
40	3.3268471e-05	2.281e-08	0.000306437	7655
41	4.21741e-05	1.448e-08	0.000377168	9419
42	5.2440817e-05	1.659e-08	0.000455025	11360
43	6.4243081e-05	3.681e-08	0.000540698	13492
44	7.7776961e-05	3.344e-08	0.000634933	15835
45	9.3322112e-05	5.717e-08	0.000738541	18408
46	0.00011117646	2.572e-08	0.0008524	21230
47	0.00013165485	4.353e-08	0.000977459	24324
48	0.00015518865	4.04e-08	0.00111474	27713
49	0.00018218722	4.837e-08	0.00126534	31422
50	0.00021313056	5.953e-08	0.00143045	35478
51	0.00024863846	5.386e-08	0.00161131	39906
52	0.00028941059	1.022e-07	0.00180927	44737
53	0.00033611893	9.758e-08	0.00202575	49999
54	0.00038992778	8.46e-08	0.00226224	55723
55	0.00045161987	9.696e-08	0.00252031	61939
56	0.00052245528	1.161e-07	0.0028016	68679
57	0.00060367044	1.52e-07	0.00310781	75972
58	0.00069664547	1.586e-07	0.00344066	83848
59	0.00080322346	1.181e-07	0.00380192	92333
60	0.00092554991	1.544e-07	0.00419338	101452
61	0.0010657257	2.148e-07	0.00461678	111227
62	0.0012259116	2.28e-07	0.00507384	121675
63	0.0014094296	2.305e-07	0.00556622	132804
64	0.0016197993	2.795e-07	0.00609542	144621
65	0.001859685	3.275e-07	0.00666283	157119
66	0.0021334487	2.337e-07	0.00726962	170287
67	0.0024450079	2.481e-07	0.00791672	184097
68	0.0028003156	2.98e-07	0.00860475	198513
69	0.0032033579	3.175e-07	0.009334	213483
70	0.0036624401	3.32e-07	0.0101043	228946
71	0.0041826753	7.217e-07	0.0109152	244821
72	0.0047715209	4.501e-07	0.0117656	261012
73	0.0054365222	3.586e-07	0.0126539	277414
74	0.0061858883	5.961e-07	0.0135781	293911
75	0.0070282415	6.632e-07	0.0145355	310362
76	0.0079743594	7.249e-07	0.015523	326624
77	0.0090317487	9.358e-07	0.0165369	342559
78	0.010214361	1.004e-06	0.0175731	358002
79	0.011528444	1.636e-06	0.018627	372802
80	0.012986611	1.083e-06	0.0196938	386810
81	0.014601966	1.352e-06	0.0207683	399879
82	0.016381772	1.428e-06	0.0218454	411887
83	0.018342794	1.67e-06	0.0229196	422696
84	0.020497518	1.293e-06	0.0239857	432214
85	0.022850417	2.351e-06	0.0250386	440366
86	0.025416758	1.823e-06	0.0260734	447094
87	0.028209997	2.539e-06	0.0270857	452350
88	0.03123429	2.452e-06	0.0280713	456116
89	0.034510253	3.314e-06	0.0290266	458396
90	0.038035821	2.341e-06	0.0299485	459225
91	0.041819857	2.317e-06	0.0308344	458648
92	0.045873416	3.14e-06	0.0316822	456734
93	0.050209967	4.6e-06	0.0324904	453544
94	0.054820392	5.953e-06	0.033258	449165
95	0.059734752	5.491e-06	0.0339846	443715
96	0.064952759	5.265e-06	0.0346699	437277
97	0.070464735	5.168e-06	0.0353143	429951
98	0.076291255	5.466e-06	0.0359185	421858
99	0.082425422	9.006e-06	0.0364833	413097
100	0.088866502	8.575e-06	0.03701	403765
101	0.095645439	6.621e-06	0.0375	393980
102	0.10279364	9.751e-06	0.0379548	383808
103	0.11024496	1.11e-05	0.0383761	373347
104	0.11804899	1.097e-05	0.0387655	362650
105	0.1261839	1.408e-05	0.0391248	351825
106	0.13466397	1.368e-05	0.0394558	340924
107	0.14351672	2.303e-05	0.0397604	329991
108	0.15269203	1.571e-05	0.0400401	319105
109	0.1621852	1.781e-05	0.0402967	308299
110	0.1720683	1.423e-05	0.0405318	297609
111	0.18233994	2.343e-05	0.040747	287070
112	0.19296762	2.11e-05	0.0409438	276713
113	0.20405616	1.974e-05	0.0411236	266543
114	0.21551877	1.841e-05	0.0412877	256603
115	0.22735175	3.008e-05	0.0414374	246906
116	0.23953806	3.096e-05	0.0415738	237444
117	0.25212391	2.102e-05	0.0416981	228254
118	0.26509795	2.971e-05	0.0418112	219336
119	0.27853611	2.398e-05	0.0419142	210688
