# Supplementary material for: Quantifying the Potential for Future Gene Therapy to Lower Lifetime Risk of Polygenic Late-Onset Diseases
Source: MDPI journal article supplement (doi:10.3390/ijms20133352), 2019-07-08
Supplement: s2 [file s2 › SuppFiles/Results/LODsRareMedium/CAD/FrailtyAnalysis.csv]

Age	Heritability	MeanOR	CaseOR	nControls	nCases	nCumIncidence	nIncidence	nLifeIncidence0	nAbsIncidence0	nLifeIncidence5	nAbsIncidence5	nLifeIncidence10	nAbsIncidence10	nLifeIncidence15	nAbsIncidence15
36	0.55748	0.99976	144.76	9999584	416	4.16e-05	4.16e-05	4.0564e-05	4.0564e-05	4.0801e-05	4.0801e-05	4.1004e-05	4.1004e-05	4.1173e-05	4.1173e-05
37	0.55736	0.99935	124.66	9998726	858	0.0001274	8.5804e-05	0.00012412	8.3556e-05	0.00012486	8.4065e-05	0.00012549	8.4495e-05	0.00012603	8.4864e-05
38	0.55717	0.99874	128.33	9997460	1266	0.000254	0.00012662	0.00024723	0.00012313	0.00024876	0.00012391	0.00025004	0.00012456	0.00025115	0.00012513
39	0.55692	0.99785	110.25	9995573	1887	0.0004427	0.00018875	0.00043046	0.00018328	0.00043322	0.0001845	0.0004355	0.00018551	0.00043748	0.00018638
40	0.55659	0.9967	102.07	9993075	2498	0.0006925	0.00024991	0.00067265	0.0002423	0.0006771	0.00024399	0.00068077	0.00024537	0.00068393	0.00024655
41	0.55621	0.9953	89.739	9989957	3118	0.0010043	0.00031202	0.00097446	0.00030202	0.00098114	0.00030425	0.00098658	0.00030603	0.00099126	0.00030754
42	0.55577	0.99366	86.172	9986263	3694	0.0013737	0.00036977	0.0013314	0.0003573	0.0013409	0.00036009	0.0013485	0.00036228	0.001355	0.00036413
43	0.55523	0.99162	80.673	9981611	4652	0.0018389	0.00046584	0.0017801	0.0004493	0.0017932	0.00045301	0.0018038	0.00045589	0.0018127	0.00045829
44	0.55463	0.98932	71.715	9976187	5424	0.0023813	0.0005434	0.0023022	0.00052307	0.0023199	0.00052766	0.002334	0.00053118	0.0023458	0.00053407
45	0.55393	0.98662	71.443	9969824	6363	0.0030176	0.00063782	0.0029134	0.00061264	0.0029368	0.00061838	0.0029552	0.00062272	0.0029705	0.00062623
46	0.5532	0.98367	60.397	9962573	7251	0.0037427	0.00072729	0.0036082	0.00069694	0.0036387	0.00070399	0.0036622	0.00070918	0.0036817	0.00071333
47	0.55236	0.98028	58.832	9954185	8388	0.0045815	0.00084195	0.00441	0.00080476	0.0044492	0.00081356	0.0044791	0.0008199	0.0045035	0.00082489
48	0.55142	0.97642	54.174	9944400	9785	0.00556	0.000983	0.0053426	0.00093696	0.005393	0.00094811	0.0054306	0.00095593	0.0054611	0.00096201
49	0.55036	0.97209	53.617	9933375	11025	0.0066625	0.0011087	0.0063903	0.0010535	0.0064542	0.0010672	0.0065012	0.0010765	0.0065388	0.0010837
50	0.5492	0.96723	48.617	9920664	12711	0.0079336	0.0012796	0.0075941	0.0012119	0.0076752	0.0012291	0.0077335	0.0012406	0.0077798	0.0012493
51	0.54798	0.96201	43.252	9906573	14091	0.0093427	0.0014204	0.0089236	0.0013402	0.0090255	0.0013611	0.0090975	0.0013749	0.0091538	0.001385
52	0.54663	0.95623	41.409	9890714	15859	0.010929	0.0016009	0.010414	0.0015043	0.010541	0.0015301	0.01063	0.0015469	0.010698	0.0015589
53	0.54517	0.94984	38.731	9872831	17883	0.012717	0.0018081	0.012087	0.0016914	0.012246	0.0017234	0.012355	0.0017439	0.012437	0.0017583
54	0.5436	0.9429	35.285	9852839	19992	0.014716	0.002025	0.013948	0.0018851	0.014146	0.0019242	0.014279	0.0019492	0.014379	0.0019663
55	0.5419	0.93531	33.139	9830534	22305	0.016947	0.0022638	0.016013	0.0020963	0.016258	0.0021439	0.016422	0.0021744	0.016541	0.0021948
56	0.54007	0.9271	30.806	9805783	24751	0.019422	0.0025178	0.018292	0.002318	0.018593	0.0023756	0.018793	0.0024127	0.018937	0.0024371
57	0.53812	0.91832	28.665	9778658	27125	0.022134	0.0027662	0.020774	0.0025308	0.021142	0.0025994	0.021386	0.002644	0.021558	0.002673
58	0.53599	0.90871	27.216	9748417	30241	0.025158	0.0030926	0.023522	0.0028102	0.023971	0.0028931	0.024269	0.0029477	0.024475	0.0029828
59	0.53371	0.89836	25.096	9714859	33558	0.028514	0.0034424	0.026549	0.0031052	0.027095	0.0032046	0.027457	0.0032711	0.027705	0.0033136
60	0.53127	0.88727	23.342	9677972	36887	0.032203	0.003797	0.02985	0.0033982	0.030511	0.0035159	0.030951	0.0035959	0.031248	0.0036471
61	0.52868	0.87536	21.396	9637055	40917	0.036295	0.0042278	0.033481	0.0037522	0.034278	0.0038923	0.034811	0.0039891	0.035169	0.0040514
62	0.52599	0.86293	19.614	9592934	44121	0.040707	0.0045783	0.037362	0.0040269	0.038314	0.0041886	0.038957	0.0043021	0.039386	0.004376
63	0.52311	0.84958	18.123	9544043	48891	0.045596	0.0050966	0.041621	0.0044397	0.042757	0.0046312	0.043531	0.0047678	0.044046	0.0048578
64	0.52004	0.83545	16.962	9490878	53165	0.050912	0.0055705	0.046205	0.0048025	0.047553	0.0050248	0.04848	0.0051857	0.049098	0.0052933
65	0.51676	0.8205	15.882	9433069	57809	0.056693	0.006091	0.051134	0.0051934	0.052727	0.0054514	0.053833	0.0056402	0.054573	0.0057684
66	0.51331	0.80479	14.651	9370204	62865	0.06298	0.0066643	0.05643	0.0056152	0.058306	0.0059146	0.059621	0.0061355	0.060504	0.006288
67	0.50969	0.7883	13.45	9301840	68364	0.069816	0.0072959	0.062117	0.0060692	0.064319	0.0064172	0.065876	0.0066749	0.066928	0.0068558
68	0.50593	0.77125	12.311	9228385	73455	0.077161	0.0078968	0.068144	0.006479	0.070718	0.006879	0.07255	0.0071758	0.0738	0.0073874
69	0.50201	0.75357	11.258	9149250	79135	0.085075	0.0085752	0.07454	0.006931	0.07754	0.007393	0.079689	0.0077352	0.081167	0.0079829
70	0.49786	0.73512	10.442	9063788	85462	0.093621	0.0093409	0.081336	0.007428	0.084827	0.0079644	0.087337	0.00836	0.089081	0.0086495
71	0.49354	0.71608	9.6211	8972209	91579	0.10278	0.010104	0.088491	0.0078934	0.092543	0.0085132	0.095465	0.0089672	0.097512	0.009302
72	0.48905	0.6965	8.8235	8874267	97942	0.11257	0.010916	0.095995	0.0083637	0.10069	0.0090808	0.10408	0.0096015	0.10647	0.0099871
73	0.48446	0.67663	7.9961	8770240	104027	0.12298	0.011722	0.1038	0.0087914	0.10923	0.0096176	0.11314	0.010211	0.11593	0.010652
74	0.47964	0.65616	7.3948	8659006	111234	0.1341	0.012683	0.11195	0.0092917	0.11822	0.010251	0.12273	0.010935	0.12596	0.011441
75	0.47468	0.63534	6.7646	8541008	117998	0.1459	0.013627	0.12037	0.0097307	0.1276	0.010836	0.13279	0.011619	0.13652	0.012196
76	0.46955	0.61434	6.2099	8416915	124093	0.15831	0.014529	0.12899	0.010088	0.13729	0.01135	0.14325	0.012242	0.14753	0.012895
77	0.46422	0.59297	5.7103	8285334	131581	0.17147	0.015633	0.13785	0.010525	0.14738	0.011978	0.15419	0.013004	0.15911	0.01375
78	0.45888	0.57185	5.1665	8148813	136521	0.18512	0.016477	0.14673	0.010723	0.15761	0.012358	0.16539	0.013519	0.171	0.014354
79	0.45336	0.55057	4.7498	8005388	143425	0.19946	0.017601	0.15572	0.011031	0.16812	0.012894	0.17699	0.014226	0.18336	0.015174
80	0.44776	0.52942	4.3461	7856468	148920	0.21435	0.018602	0.16467	0.011184	0.17876	0.013283	0.18883	0.014793	0.19606	0.015861
81	0.44203	0.50842	3.9647	7701636	154832	0.22984	0.019708	0.17356	0.011316	0.18951	0.013684	0.20093	0.015396	0.20911	0.016605
82	0.43626	0.48771	3.625	7541907	159729	0.24581	0.02074	0.18228	0.011313	0.20026	0.013964	0.21316	0.01589	0.22239	0.017253
83	0.43037	0.46725	3.3267	7377306	164601	0.26227	0.021825	0.19076	0.011244	0.21097	0.014203	0.22551	0.016368	0.2359	0.017906
84	0.42446	0.44714	3.0315	7207713	169593	0.27923	0.022988	0.19895	0.011112	0.2216	0.014408	0.23793	0.016841	0.24961	0.018581
85	0.41856	0.42765	2.7644	7035545	172168	0.29645	0.023887	0.20671	0.010756	0.23195	0.014361	0.25023	0.017057	0.2633	0.018995
86	0.41259	0.40859	2.537	6859882	175663	0.31401	0.024968	0.21402	0.010391	0.24204	0.014336	0.26242	0.017336	0.27702	0.019506
87	0.40666	0.3901	2.2992	6680815	179067	0.33192	0.026104	0.22085	0.0099516	0.25181	0.014239	0.27448	0.017575	0.29074	0.02
88	0.40072	0.37212	2.1135	6499297	181518	0.35007	0.02717	0.22712	0.0093919	0.26116	0.013997	0.28629	0.017682	0.30435	0.020377
89	0.39483	0.35483	1.9301	6316761	182536	0.36832	0.028085	0.23277	0.0087007	0.26998	0.013576	0.29773	0.017603	0.31773	0.020576
90	0.38897	0.33817	1.7813	6133976	182785	0.3866	0.028937	0.23778	0.0079287	0.27821	0.01303	0.30872	0.017397	0.33078	0.020663
91	0.38315	0.32215	1.6269	5950118	183858	0.40499	0.029974	0.24217	0.0071573	0.28586	0.012475	0.31928	0.01721	0.34354	0.020812
92	0.37742	0.30681	1.4891	5766403	183715	0.42336	0.030876	0.24593	0.0063201	0.29287	0.011771	0.3293	0.016843	0.35591	0.020788
93	0.37178	0.29219	1.3707	5584202	182201	0.44158	0.031597	0.24907	0.0054448	0.29917	0.010922	0.33869	0.016278	0.36777	0.020563
94	0.36616	0.2781	1.2652	5401999	182203	0.4598	0.032628	0.25166	0.0046401	0.30481	0.010108	0.34749	0.015772	0.37919	0.02045
95	0.36063	0.26475	1.1636	5222548	179451	0.47775	0.033219	0.25373	0.0038157	0.30973	0.0091023	0.35558	0.014959	0.38998	0.019972
96	0.35523	0.25203	1.0695	5044633	177915	0.49554	0.034067	0.25534	0.0030878	0.31398	0.0081346	0.36298	0.014178	0.4002	0.01956
97	0.34986	0.23989	0.99213	4869244	175389	0.51308	0.034767	0.25656	0.0024282	0.31757	0.0071167	0.36967	0.013255	0.40976	0.018965
98	0.34468	0.22844	0.91305	4697318	171926	0.53027	0.035309	0.25747	0.0018551	0.32053	0.0060844	0.37561	0.012205	0.41862	0.01819
99	0.33963	0.21756	0.84371	4528214	169104	0.54718	0.036	0.25812	0.0013894	0.32293	0.0051196	0.38085	0.011153	0.42679	0.017401
100	0.33468	0.20731	0.78211	4363592	164622	0.56364	0.036355	0.25858	0.0010076	0.32482	0.0041759	0.38536	0.0099614	0.43421	0.016371
101	0.32975	0.19748	0.72962	4201457	162135	0.57985	0.037156	0.25889	0.00072343	0.32629	0.0033678	0.38923	0.0088724	0.44096	0.015464
102	0.32494	0.18824	0.67503	4043771	157686	0.59562	0.037531	0.2591	0.00050161	0.3274	0.0026212	0.39246	0.0076825	0.44697	0.014308
103	0.3203	0.17951	0.62707	3890186	153585	0.61098	0.037981	0.25924	0.00033955	0.3282	0.0019955	0.3951	0.0065448	0.45228	0.013129
104	0.3157	0.17117	0.58876	3740486	149700	0.62595	0.038481	0.25933	0.00022377	0.32878	0.0014852	0.39723	0.0054724	0.45691	0.011921
105	0.31129	0.16338	0.54733	3596319	144167	0.64037	0.038542	0.25938	0.00014145	0.32918	0.0010682	0.39889	0.0044272	0.46086	0.010561
106	0.30693	0.15595	0.51147	3455440	140879	0.65446	0.039173	0.25941	8.7748e-05	0.32945	0.0007627	0.40017	0.0035507	0.46423	0.009354
107	0.30269	0.14892	0.47866	3318911	136529	0.66811	0.039511	0.25943	5.1957e-05	0.32964	0.00052807	0.40112	0.0027595	0.46702	0.0080878
108	0.29866	0.14233	0.44413	3186794	132117	0.68132	0.039807	0.25944	2.9656e-05	0.32975	0.00035588	0.40181	0.0020915	0.4693	0.0068596
109	0.29462	0.13605	0.41949	3059252	127542	0.69407	0.040022	0.25944	1.6009e-05	0.32983	0.00023273	0.40231	0.0015447	0.47111	0.0056915
110	0.29073	0.13014	0.39309	2936281	122971	0.70637	0.040196	0.25945	8.2403e-06	0.32987	0.00014752	0.40265	0.001114	0.47253	0.0046172
111	0.28698	0.12457	0.36749	2817480	118801	0.71825	0.04046	0.25945	4.046e-06	0.3299	9.063e-05	0.40288	0.00078775	0.4736	0.0036673
112	0.28328	0.11924	0.34853	2702617	114863	0.72974	0.040768	0.25945	1.8346e-06	0.32992	5.361e-05	0.40303	0.00054486	0.4744	0.0028472
113	0.27965	0.1142	0.32729	2591862	110755	0.74081	0.040981	0.25945	8.1961e-07	0.32992	3.0531e-05	0.40313	0.00036637	0.47499	0.0021531
114	0.27613	0.10942	0.30995	2485456	106406	0.75145	0.041054	0.25945	2.0527e-07	0.32993	1.6422e-05	0.40319	0.00023873	0.4754	0.0015845
115	0.27268	0.10488	0.29136	2382320	103136	0.76177	0.041496	0.25945	0	0.32993	8.5066e-06	0.40323	0.00015229	0.47568	0.0011501
116	0.26934	0.10062	0.2751	2284021	98299	0.7716	0.041262	0.25945	0	0.32993	4.1262e-06	0.40325	9.2427e-05	0.47587	0.00080337
117	0.26613	0.09658	0.25948	2189342	94679	0.78107	0.041453	0.25945	0	0.32993	1.8654e-06	0.40327	5.451e-05	0.476	0.00055402
118	0.26293	0.092731	0.24634	2098217	91125	0.79018	0.041622	0.25945	0	0.32993	8.3244e-07	0.40327	3.1008e-05	0.47608	0.0003721
119	0.25983	0.089092	0.23252	2010657	87560	0.79893	0.041731	0.25945	0	0.32993	2.0865e-07	0.40328	1.6692e-05	0.47613	0.00024266
120	0.25685	0.085644	0.22028	1926643	84014	0.80734	0.041784	0.25945	0	0.32993	0	0.40328	8.5658e-06	0.47616	0.00015335
