# Supplementary material for: Quantifying the Potential for Future Gene Therapy to Lower Lifetime Risk of Polygenic Late-Onset Diseases
Source: MDPI journal article supplement (doi:10.3390/ijms20133352), 2019-07-08
Supplement: s2 [file s2 › SuppFiles/Results/LODsRareMedium/ColorectalCancer/-1.000/FrailtyAnalysis.csv]

Age	Heritability	MeanOR	CaseOR	nControls	nCases	nCumIncidence	nIncidence	nLifeIncidence0	nAbsIncidence0	nLifeIncidence5	nAbsIncidence5	nLifeIncidence10	nAbsIncidence10	nLifeIncidence15	nAbsIncidence15	nIncActDivExp
24	0.1568	0.56272	0.804744	999999660	340	3.4e-07	3.4e-07	3.35731e-07	3.35731e-07	3.36894e-07	3.36894e-07	3.37401e-07	3.37401e-07	3.37567e-07	3.37567e-07	0.195469
25	0.1568	0.56272	0.807406	999998870	790	1.13e-06	7.9e-07	1.11512e-06	7.79387e-07	1.11927e-06	7.82373e-07	1.12123e-06	7.8383e-07	1.12183e-06	7.84265e-07	0.213155
26	0.1568	0.56272	0.814806	999997663	1207	2.337e-06	1.207e-06	2.30482e-06	1.1897e-06	2.31388e-06	1.19462e-06	2.31853e-06	1.1973e-06	2.31997e-06	1.19814e-06	0.203584
27	0.1568	0.562719	0.819173	999995928	1735	4.072e-06	1.735e-06	4.01335e-06	1.70854e-06	4.02988e-06	1.71601e-06	4.03908e-06	1.72055e-06	4.04206e-06	1.7221e-06	0.205568
28	0.1568	0.562719	0.817796	999993611	2317	6.389e-06	2.31701e-06	6.2928e-06	2.27946e-06	6.31974e-06	2.28987e-06	6.33593e-06	2.29686e-06	6.34161e-06	2.29956e-06	0.205457
29	0.156801	0.562718	0.820575	999990691	2920	9.309e-06	2.92002e-06	9.16266e-06	2.86988e-06	9.20308e-06	2.88336e-06	9.22926e-06	2.89334e-06	9.23929e-06	2.8977e-06	0.201624
30	0.156801	0.562717	0.809302	999987001	3690	1.2999e-05	3.69003e-06	1.27856e-05	3.623e-06	1.28435e-05	3.64046e-06	1.28836e-05	3.65441e-06	1.29005e-05	3.66122e-06	0.203837
31	0.156801	0.562716	0.817889	999982358	4643	1.7642e-05	4.64306e-06	1.73395e-05	4.55394e-06	1.74199e-05	4.5765e-06	1.7479e-05	4.59542e-06	1.75062e-05	4.60575e-06	0.209227
32	0.156801	0.562715	0.810962	999976776	5582	2.3224e-05	5.5821e-06	2.28084e-05	5.46901e-06	2.29168e-05	5.49694e-06	2.29999e-05	5.52097e-06	2.30417e-05	5.5356e-06	0.208223
33	0.156802	0.562714	0.802624	999970042	6734	2.9958e-05	6.73416e-06	2.93986e-05	6.59035e-06	2.95417e-05	6.62503e-06	2.9655e-05	6.65527e-06	2.97171e-05	6.6756e-06	0.210308
34	0.156802	0.562712	0.812921	999962182	7860	3.7818e-05	7.86024e-06	3.70818e-05	7.68346e-06	3.72667e-05	7.72528e-06	3.74163e-05	7.76155e-06	3.75053e-05	7.78843e-06	0.207374
35	0.156803	0.56271	0.808624	999953032	9150	4.6968e-05	9.15035e-06	4.60152e-05	8.93371e-06	4.62505e-05	8.98413e-06	4.64434e-05	9.02741e-06	4.6567e-05	9.062e-06	0.205429
36	0.156803	0.562708	0.815519	999942297	10735	5.7703e-05	1.07355e-05	5.64829e-05	1.04681e-05	5.67794e-05	1.05294e-05	5.70245e-05	1.05816e-05	5.71918e-05	1.06254e-05	0.206324
37	0.156804	0.562706	0.811453	999929907	12390	7.0093e-05	1.23907e-05	6.85484e-05	1.20662e-05	6.89184e-05	1.21397e-05	6.92255e-05	1.22017e-05	6.94462e-05	1.2255e-05	0.204876
38	0.156805	0.562703	0.807674	999915338	14569	8.4662e-05	1.457e-05	8.27161e-05	1.41687e-05	8.31763e-05	1.42589e-05	8.35584e-05	1.43339e-05	8.38445e-05	1.43993e-05	0.208136
39	0.156806	0.562699	0.815873	999898651	16687	0.000101349	1.66884e-05	9.89196e-05	1.62049e-05	9.9488e-05	1.63131e-05	9.99589e-05	1.64019e-05	0.000100322	1.64789e-05	0.206705
40	0.156807	0.562695	0.812963	999879570	19081	0.00012043	1.90829e-05	0.000117419	1.85015e-05	0.000118117	1.86311e-05	0.000118693	1.87363e-05	0.000119147	1.88266e-05	0.205578
41	0.156809	0.562691	0.806497	999857228	22342	0.000142772	2.23447e-05	0.000139045	2.16287e-05	0.000139903	2.17882e-05	0.000140606	2.19158e-05	0.000141168	2.20244e-05	0.209929
42	0.15681	0.562685	0.814787	999831926	25302	0.000168074	2.53056e-05	0.000163494	2.44524e-05	0.000164542	2.46429e-05	0.000165396	2.47929e-05	0.000166084	2.49196e-05	0.207834
43	0.156812	0.562679	0.809068	999802427	29499	0.000197573	2.9504e-05	0.000191946	2.84566e-05	0.000193229	2.86913e-05	0.000194265	2.88739e-05	0.000195105	2.90258e-05	0.212278
44	0.156814	0.562672	0.808094	999768860	33567	0.00023114	3.35736e-05	0.000224257	3.23176e-05	0.000225823	3.2601e-05	0.000227077	3.28186e-05	0.000228096	3.29972e-05	0.212021
45	0.156817	0.562665	0.810283	999730877	37983	0.000269123	3.79918e-05	0.000260741	3.64919e-05	0.000262649	3.68342e-05	0.000264161	3.70923e-05	0.000265389	3.73017e-05	0.210954
46	0.156819	0.562656	0.809198	999687491	43386	0.000312509	4.33977e-05	0.000302316	4.15867e-05	0.000304645	4.2007e-05	0.000306466	4.23169e-05	0.000307942	4.25647e-05	0.212223
47	0.156822	0.562646	0.813352	999637885	49606	0.000362115	4.96215e-05	0.000349731	4.74295e-05	0.000352578	4.79485e-05	0.000354773	4.83219e-05	0.000356543	4.86162e-05	0.214036
48	0.156826	0.562634	0.810746	999581801	56084	0.000418199	5.61043e-05	0.000403188	5.34764e-05	0.000406671	5.41126e-05	0.000409312	5.45589e-05	0.00041143	5.49062e-05	0.213767
49	0.15683	0.562621	0.812815	999518178	63623	0.000481822	6.36496e-05	0.000463645	6.04824e-05	0.000467914	6.12685e-05	0.000471092	6.18057e-05	0.000473622	6.22181e-05	0.21453
50	0.156834	0.562606	0.81302	999445604	72574	0.000554396	7.2609e-05	0.000532375	6.87636e-05	0.000537623	6.97424e-05	0.000541455	7.03966e-05	0.000544477	7.089e-05	0.216789
51	0.156839	0.562589	0.809478	999363359	82245	0.000636641	8.22906e-05	0.000609977	7.76441e-05	0.000616436	7.88566e-05	0.000621064	7.96536e-05	0.000624674	8.02412e-05	0.217953
52	0.156845	0.56257	0.811374	999270695	92664	0.000729305	9.2723e-05	0.000697052	8.71304e-05	0.000705006	8.8627e-05	0.000710604	8.95969e-05	0.000714911	9.02946e-05	0.218165
53	0.156852	0.562548	0.811344	999164986	105709	0.000835014	0.000105786	0.000795941	9.89619e-05	0.000805764	0.000100831	0.00081256	0.000102031	0.000817709	0.000102872	0.221435
54	0.156859	0.562524	0.809641	999045960	119026	0.00095404	0.000119125	0.000906746	0.000110897	0.000918867	0.000113198	0.000927133	0.000114669	0.000933286	0.000115674	0.222178
55	0.156867	0.562496	0.810504	998911521	134439	0.00108848	0.000134567	0.00103123	0.000124607	0.00104619	0.000127441	0.00105626	0.000129255	0.00106363	0.000130467	0.223978
56	0.156877	0.562465	0.810725	998759256	152265	0.00124074	0.000152431	0.00117142	0.000140335	0.00118985	0.000143824	0.00120218	0.00014607	0.00121101	0.000147546	0.226797
57	0.156887	0.562429	0.809943	998587798	171458	0.0014122	0.000171671	0.00132828	0.00015706	0.00135097	0.000161317	0.00136606	0.000164087	0.00137669	0.000165883	0.228734
58	0.156899	0.56239	0.810631	998395178	192620	0.00160482	0.000192892	0.00150331	0.000175279	0.00153116	0.000180449	0.00154966	0.000183857	0.00156247	0.000186045	0.230592
59	0.156912	0.562345	0.811136	998179573	215605	0.00182043	0.000215952	0.0016978	0.000194798	0.00173188	0.000201036	0.00175453	0.000205206	0.00177001	0.000207873	0.232091
60	0.156927	0.562295	0.810615	997936232	243341	0.00206377	0.000243785	0.00191559	0.000218185	0.00195721	0.000225741	0.00198499	0.000230874	0.00200375	0.00023416	0.236059
61	0.156944	0.562239	0.811478	997664766	271466	0.00233523	0.000272027	0.00215651	0.000241426	0.00220713	0.000250441	0.00224113	0.000256667	0.00226388	0.000260676	0.237872
62	0.156963	0.562176	0.811392	997361152	303614	0.00263885	0.000304325	0.00242356	0.000267673	0.0024849	0.000278424	0.00252643	0.000285969	0.00255409	0.000290881	0.240911
63	0.156984	0.562107	0.809596	997022535	338617	0.00297746	0.000339513	0.00271854	0.000295753	0.0027926	0.000308512	0.0028432	0.000317611	0.00287684	0.00032361	0.243953
64	0.157007	0.562029	0.809945	996645386	377149	0.00335461	0.000378275	0.00304369	0.000326126	0.00313281	0.000341221	0.0031943	0.000352148	0.00323522	0.000359452	0.2474
65	0.157033	0.561942	0.811393	996227899	417487	0.0037721	0.000418892	0.00339965	0.000357162	0.00350645	0.000374904	0.00358089	0.000387888	0.0036306	0.000396708	0.250103
66	0.157061	0.561847	0.810021	995765340	462559	0.00423466	0.00046431	0.00378939	0.000391214	0.00391698	0.000412078	0.00400674	0.000427465	0.00406704	0.000438093	0.253865
67	0.157093	0.561742	0.810173	995255061	510279	0.00474494	0.000512449	0.00421388	0.000426288	0.0043658	0.000450732	0.00447359	0.000468835	0.00454654	0.000481541	0.257418
68	0.157128	0.561625	0.810373	994694168	560893	0.00530583	0.000563567	0.00467406	0.000462381	0.0048544	0.000490929	0.00498327	0.000512108	0.00507125	0.000527211	0.260978
69	0.157166	0.561498	0.809753	994077250	616918	0.00592275	0.000620209	0.00517269	0.00050129	0.00538627	0.000534707	0.00553975	0.000559456	0.00564556	0.000577371	0.265704
70	0.157208	0.561359	0.809729	993404074	673176	0.00659593	0.000677187	0.00570801	0.000538506	0.00596024	0.000577393	0.00614224	0.000606075	0.00626891	0.000627065	0.269369
71	0.157253	0.561206	0.810016	992669943	734131	0.00733006	0.000739005	0.00628153	0.00057733	0.0065788	0.000622664	0.00679378	0.000655871	0.00694479	0.000680362	0.273953
72	0.157303	0.561041	0.809072	991872013	797930	0.00812799	0.000803822	0.00689289	0.000615868	0.00724257	0.000668671	0.00749561	0.000707014	0.0076748	0.000735409	0.278751
73	0.157357	0.560861	0.810526	991007440	864573	0.00899256	0.000871658	0.00754129	0.000653722	0.00795191	0.000715156	0.00824875	0.00075931	0.00846043	0.000792067	0.283845
74	0.157415	0.560668	0.81011	990076834	930606	0.00992317	0.00093905	0.00822306	0.000687953	0.00870409	0.000758997	0.00905107	0.000809593	0.00929988	0.000847066	0.288241
75	0.157477	0.56046	0.809386	989078061	998773	0.0109219	0.00100878	0.00893625	0.000720337	0.00949832	0.000802195	0.00990265	0.000860124	0.0101938	0.000902851	0.292982
76	0.157543	0.560237	0.809327	988009244	1068817	0.0119908	0.00108062	0.00967837	0.000750317	0.0103333	0.000844207	0.0108032	0.000910498	0.0111424	0.000959055	0.298066
77	0.157614	0.559999	0.809575	986869980	1139264	0.01313	0.00115309	0.0104454	0.000776358	0.0112062	0.000883469	0.0117509	0.000959216	0.0121444	0.00101422	0.303172
78	0.15769	0.559745	0.809685	985657585	1212395	0.0143424	0.00122853	0.0112344	0.000799494	0.0121154	0.000921363	0.0127456	0.00100795	0.0132005	0.00107018	0.308986
79	0.15777	0.559476	0.809436	984372622	1284963	0.0156274	0.00130366	0.0120398	0.000817082	0.0130568	0.000955068	0.0137842	0.0010537	0.0143084	0.00112394	0.314731
80	0.157855	0.559192	0.808198	983016834	1355788	0.0169832	0.00137731	0.0128549	0.000828081	0.0140249	0.00098349	0.0148624	0.00109525	0.0154644	0.00117434	0.320227
81	0.157944	0.558892	0.808877	981590071	1426763	0.0184099	0.00145141	0.0136741	0.000833365	0.0150156	0.00100777	0.015977	0.00113388	0.0166665	0.00122292	0.326009
82	0.158038	0.558577	0.808738	980094818	1495253	0.0199052	0.0015233	0.0144898	0.000830951	0.0160223	0.00102561	0.0171226	0.00116711	0.0179103	0.00126718	0.331534
83	0.158136	0.558247	0.808112	978531252	1563566	0.0214687	0.00159532	0.0152953	0.00082187	0.0170399	0.0010382	0.0182952	0.00119645	0.0191932	0.00130889	0.337375
84	0.158238	0.557903	0.807972	976900069	1631183	0.0230999	0.00166697	0.0160838	0.000805764	0.0180622	0.00104479	0.0194903	0.00122123	0.0205116	0.00134735	0.34344
85	0.158345	0.557544	0.807767	975203281	1696788	0.0247967	0.00173691	0.0168478	0.000782139	0.0190824	0.00104428	0.0207019	0.00124027	0.0218609	0.00138121	0.349478
86	0.158456	0.557169	0.808199	973442244	1761037	0.0265578	0.00180582	0.0175808	0.000751562	0.0200935	0.00103685	0.0219246	0.00125385	0.0232367	0.00141075	0.355646
87	0.158571	0.556782	0.807227	971619057	1823187	0.0283809	0.00187293	0.0182758	0.000714026	0.0210881	0.00102167	0.0231522	0.00126101	0.0246336	0.00143499	0.361806
88	0.15869	0.55638	0.80742	969736056	1883001	0.0302639	0.001938	0.0189267	0.00066991	0.0220581	0.000998411	0.0243776	0.0012612	0.0260458	0.00145345	0.367919
89	0.158813	0.555965	0.806984	967793365	1942691	0.0322066	0.00200332	0.0195286	0.000620618	0.0229972	0.000968344	0.0255952	0.0012556	0.027469	0.00146764	0.374416
90	0.158939	0.555538	0.806474	965797320	1996045	0.0342027	0.00206247	0.0200755	0.000565127	0.023896	0.000928741	0.0267952	0.00124002	0.0288943	0.00147274	0.380097
91	0.159069	0.555097	0.806723	963746529	2050791	0.0362535	0.00212342	0.0205652	0.00050704	0.0247495	0.000883745	0.0279728	0.00121921	0.0303182	0.00147437	0.386437
92	0.159202	0.554644	0.806253	961644007	2102522	0.038356	0.00218161	0.0209956	0.000446565	0.0255511	0.000831707	0.0291197	0.00119006	0.0317338	0.00146885	0.392583
93	0.15934	0.554179	0.805757	959489980	2154027	0.04051	0.00223994	0.0213667	0.000385987	0.0262957	0.000774281	0.0302294	0.00115396	0.0331356	0.0014577	0.399044
94	0.15948	0.553703	0.805446	957288046	2201934	0.042712	0.0022949	0.0216799	0.000326358	0.0269778	0.000710949	0.0312937	0.00110929	0.0345157	0.00143835	0.405178
95	0.159624	0.553214	0.805446	955038737	2249309	0.0449613	0.00234967	0.0219382	0.000269895	0.0275941	0.000643821	0.0323066	0.00105807	0.0358681	0.00141269	0.411537
96	0.15977	0.552715	0.804918	952744436	2294301	0.0472556	0.00240231	0.0221462	0.000217746	0.028142	0.000573636	0.0332615	0.000999818	0.0371854	0.00137935	0.417765
97	0.15992	0.552204	0.80498	950407477	2336959	0.0495925	0.00245287	0.0223094	0.000171308	0.0286203	0.00050209	0.0341524	0.00093512	0.0384602	0.00133803	0.423855
98	0.160073	0.551683	0.804232	948026632	2380845	0.0519734	0.00250508	0.0224345	0.000131617	0.0290306	0.000431675	0.0349754	0.00086593	0.0396867	0.00129055	0.430436
99	0.160229	0.551151	0.804247	945603353	2423279	0.0543966	0.00255613	0.022528	9.86538e-05	0.0293752	0.000363507	0.0357261	0.000791876	0.0408581	0.00123556	0.437005
100	0.160387	0.550608	0.804211	943143887	2459466	0.0568561	0.00260095	0.0225962	7.20853e-05	0.0296577	0.000298758	0.0364	0.000712673	0.0419656	0.00117122	0.442686
101	0.160549	0.550055	0.803418	940644854	2499033	0.0593551	0.00264968	0.0226448	5.15893e-05	0.0298842	0.000240167	0.0369967	0.000632705	0.0430057	0.00110277	0.449196
102	0.160713	0.549492	0.803554	938109132	2535722	0.0618909	0.00269573	0.0226787	3.60284e-05	0.0300613	0.00018827	0.0375158	0.000551802	0.0439724	0.00102771	0.455395
103	0.16088	0.548919	0.802911	935537659	2571473	0.0644623	0.00274112	0.0227017	2.45056e-05	0.0301964	0.000144019	0.0379589	0.00047235	0.0448612	0.000947524	0.46162
104	0.161049	0.548336	0.802789	932928449	2609210	0.0670716	0.002789	0.0227169	1.6218e-05	0.0302971	0.000107641	0.03833	0.000396623	0.0456696	0.000864017	0.468382
105	0.161221	0.547745	0.801925	930287391	2641058	0.0697126	0.00283093	0.0227266	1.03895e-05	0.0303703	7.84593e-05	0.0386333	0.000325175	0.0463932	0.00077569	0.474259
106	0.161396	0.547141	0.802523	927609690	2677701	0.0723903	0.00287836	0.0227326	6.44752e-06	0.0304225	5.60416e-05	0.038876	0.000260894	0.0470326	0.000687309	0.481155
107	0.161573	0.54653	0.801358	924901199	2708491	0.0750988	0.00291986	0.0227361	3.83962e-06	0.0304587	3.90239e-05	0.0390652	0.000203923	0.047587	0.000597681	0.487152
108	0.161752	0.545909	0.801483	922160477	2740722	0.0778395	0.00296326	0.0227382	2.20763e-06	0.0304832	2.64915e-05	0.0392092	0.00015569	0.0480593	0.000510629	0.493548
109	0.161934	0.545278	0.800932	919388054	2772423	0.0806119	0.00300644	0.0227393	1.20258e-06	0.0304993	1.74825e-05	0.0393162	0.000116034	0.0484536	0.000427546	0.499983
110	0.162119	0.54464	0.800233	916590058	2797996	0.0834099	0.00304332	0.0227399	6.23881e-07	0.0305096	1.1169e-05	0.0393937	8.43457e-05	0.048775	0.000349571	0.505439
111	0.162305	0.543992	0.800057	913761354	2828704	0.0862386	0.00308612	0.0227402	3.08612e-07	0.0305159	6.9129e-06	0.0394488	6.00867e-05	0.0490314	0.000279726	0.511937
112	0.162494	0.543335	0.79955	910904141	2857213	0.0890959	0.00312687	0.0227403	1.40709e-07	0.0305197	4.11183e-06	0.039487	4.17906e-05	0.0492309	0.000218381	0.518153
113	0.162686	0.542668	0.799535	908018183	2885958	0.0919818	0.00316823	0.0227403	6.33647e-08	0.0305218	2.36033e-06	0.0395128	2.8324e-05	0.0493825	0.000166459	0.524519
114	0.162879	0.541992	0.798773	905100221	2917962	0.0948998	0.00321355	0.0227404	1.60678e-08	0.030523	1.28542e-06	0.0395298	1.86868e-05	0.0494952	0.000124027	0.531583
115	0.163075	0.541309	0.798269	902160275	2939946	0.0978397	0.0032482	0.0227404	0	0.0305236	6.65881e-07	0.0395406	1.19209e-05	0.0495766	9.00238e-05	0.536924
116	0.163273	0.540616	0.798311	899195497	2964778	0.100805	0.00328631	0.0227404	0	0.0305239	3.28631e-07	0.0395472	7.36133e-06	0.0496344	6.39844e-05	0.542873
117	0.163473	0.539915	0.797641	896204376	2991121	0.103796	0.00332644	0.0227404	0	0.030524	1.4969e-07	0.0395511	4.37427e-06	0.0496743	4.44579e-05	0.549189
118	0.163675	0.539204	0.797303	893187926	3016450	0.106812	0.00336581	0.0227404	0	0.0305241	6.73161e-08	0.0395534	2.50753e-06	0.0497013	3.00903e-05	0.555407
119	0.163879	0.538485	0.796784	890146251	3041675	0.109854	0.00340541	0.0227404	0	0.0305241	1.70271e-08	0.0395546	1.36217e-06	0.049719	1.98025e-05	0.561692
120	0.164085	0.537759	0.796112	887082826	3063425	0.112917	0.00344149	0.0227404	0	0.0305241	0	0.0395552	7.05504e-07	0.0497302	1.26303e-05	0.567418
