# Supplementary material for: Quantifying the Potential for Future Gene Therapy to Lower Lifetime Risk of Polygenic Late-Onset Diseases
Source: MDPI journal article supplement (doi:10.3390/ijms20133352), 2019-07-08
Supplement: s2 [file s2 › SuppFiles/Results/LODsRareMedium/ColorectalCancer/-1.000/IndividualsByBetaDistrib.csv]

nEntry	Beta	nDetrimentalCount	nFractionPopulation	nCumulativeFractionPopulation	nEditsNeeded	nIndividuals
0	-19.8	0	0	1	0	0
1	-19.6	0	0	1	0	0
2	-19.4	0	0	1	0	0
3	-19.2	0	0	1	0	0
4	-19	0	0	1	0	0
5	-18.8	0	0	1	0	0
6	-18.6	0	0	1	0	0
7	-18.4	0	0	1	0	0
8	-18.2	0	0	1	0	0
9	-18	0	0	1	0	0
10	-17.8	0	0	1	0	0
11	-17.6	0	0	1	0	0
12	-17.4	0	0	1	0	0
13	-17.2	0	0	1	0	0
14	-17	0	0	1	0	0
15	-16.8	0	0	1	0	0
16	-16.6	0	0	1	0	0
17	-16.4	0	0	1	0	0
18	-16.2	0	0	1	0	0
19	-16	0	0	1	0	0
20	-15.8	0	0	1	0	0
21	-15.6	0	0	1	0	0
22	-15.4	0	0	1	0	0
23	-15.2	0	0	1	0	0
24	-15	0	0	1	0	0
25	-14.8	0	0	1	0	0
26	-14.6	0	0	1	0	0
27	-14.4	0	0	1	0	0
28	-14.2	0	0	1	0	0
29	-14	0	0	1	0	0
30	-13.8	0	0	1	0	0
31	-13.6	0	0	1	0	0
32	-13.4	0	0	1	0	0
33	-13.2	0	0	1	0	0
34	-13	0	0	1	0	0
35	-12.8	0	0	1	0	0
36	-12.6	0	0	1	0	0
37	-12.4	0	0	1	0	0
38	-12.2	0	0	1	0	0
39	-12	0	0	1	0	0
40	-11.8	0	0	1	0	0
41	-11.6	0	0	1	0	0
42	-11.4	0	0	1	0	0
43	-11.2	0	0	1	0	0
44	-11	0	0	1	0	0
45	-10.8	0	0	1	0	0
46	-10.6	0	0	1	0	0
47	-10.4	0	0	1	0	0
48	-10.2	0	0	1	0	0
49	-10	0	0	1	0	0
50	-9.8	0	0	1	0	0
51	-9.6	0	0	1	0	0
52	-9.4	0	0	1	0	0
53	-9.2	0	0	1	0	0
54	-9	0	0	1	0	0
55	-8.8	0	0	1	0	0
56	-8.6	0	0	1	0	0
57	-8.4	0	0	1	0	0
58	-8.2	0	0	1	0	0
59	-8	0	0	1	0	0
60	-7.8	0	0	1	0	0
61	-7.6	0	0	1	0	0
62	-7.4	0	0	1	0	0
63	-7.2	0	0	1	0	0
64	-7	0	0	1	0	0
65	-6.8	0	0	1	0	0
66	-6.6	0	0	1	0	0
67	-6.4	0	0	1	0	0
68	-6.2	0	0	1	0	0
69	-6	0	0	1	0	0
70	-5.8	0	0	1	0	0
71	-5.6	0	0	1	0	0
72	-5.4	0	0	1	0	0
73	-5.2	0	0	1	0	0
74	-5	0	0	1	0	0
75	-4.8	0	0	1	0	0
76	-4.6	0	0	1	0	0
77	-4.4	0	0	1	0	0
78	-4.2	0	0.000134657	1	0	134657
79	-4	1	0.000249392	0.99986534	0	249392
80	-3.8	1.3069	0.000720599	0.99961595	0	720599
81	-3.6	1.7882	0.001771561	0.99889535	0	1771561
82	-3.4	2.228	0.001797768	0.99712379	0	1797768
83	-3.2	2.6766	0.004104303	0.99532602	0	4104303
84	-3	2.9497	0.005783388	0.99122172	0	5783388
85	-2.8	3.4595	0.00810641	0.98543833	0	8106410
86	-2.6	3.9003	0.013597957	0.97733192	0	13597957
87	-2.4	4.16	0.015932057	0.96373396	0	15932057
88	-2.2	4.662	0.019809491	0.94780191	0	19809491
89	-2	5.0464	0.02783876	0.92799242	0	27838760
90	-1.8	5.343	0.030524987	0.90015366	0	30524987
91	-1.6	5.8367	0.035448997	0.86962867	0	35448997
92	-1.4	6.1824	0.043655976	0.83417967	0	43655976
93	-1.2	6.5025	0.045264443	0.7905237	0	45264443
94	-1	6.9735	0.049007465	0.74525925	0	49007465
95	-0.8	7.3101	0.054119284	0.69625179	0	54119284
96	-0.6	7.6523	0.053687061	0.6421325	0	53687061
97	-0.4	8.0801	0.055169751	0.58844544	0	55169751
98	-0.2	8.4169	0.056432135	0.53327569	0	56432135
99	0	8.7801	0.053540525	0.47684356	0	53540525
100	0.2	9.1881	0.051733375	0.42330303	0.40792	51733375
101	0.4	9.5253	0.049444323	0.37156966	0.74511	49444323
102	0.6	9.8857	0.045103462	0.32212534	1.1055	45103462
103	0.8	10.289	0.04120556	0.27702187	1.5091	41205560
104	1	10.632	0.037687764	0.23581631	1.8522	37687764
105	1.2	10.989	0.033050642	0.19812855	2.2092	33050642
106	1.4	11.372	0.029018614	0.16507791	2.5921	29018614
107	1.6	11.726	0.025075634	0.13605929	2.9457	25075634
108	1.8	12.082	0.021272828	0.11098366	3.3015	21272828
109	2	12.458	0.018052022	0.089710831	3.6781	18052022
110	2.2	12.804	0.015007634	0.071658809	4.0243	15007634
111	2.4	13.168	0.012222793	0.056651175	4.3878	12222793
112	2.6	13.543	0.009922315	0.044428382	4.7631	9922315
113	2.8	13.895	0.007985995	0.034506067	5.1152	7985995
114	3	14.249	0.006323889	0.026520072	5.4692	6323889
115	3.2	14.625	0.004945457	0.020196183	5.8446	4945457
116	3.4	14.961	0.003832118	0.015250726	6.1805	3832118
117	3.6	15.329	0.002954156	0.011418608	6.5491	2954156
118	3.8	15.693	0.002247246	0.008464452	6.9132	2247246
119	4	16.044	0.001693059	0.006217206	7.264	1693059
120	4.2	16.399	0.001256081	0.004524147	7.6188	1256081
121	4.4	16.762	0.000930048	0.003268066	7.9822	930048
122	4.6	17.116	0.000676441	0.002338018	8.3357	676441
123	4.8	17.473	0.000492523	0.001661577	8.6927	492523
124	5	17.828	0.000354391	0.001169054	9.0477	354391
125	5.2	18.179	0.000251703	0.000814663	9.399	251703
126	5.4	18.542	0.000175568	0.00056296	9.7614	175568
127	5.6	18.898	0.000123424	0.000387392	10.118	123424
128	5.8	19.243	8.5021e-05	0.000263968	10.463	85021
129	6	19.604	5.9126e-05	0.000178947	10.824	59126
130	6.2	19.958	3.9888e-05	0.000119821	11.178	39888
131	6.4	20.315	2.7166e-05	7.9933e-05	11.535	27166
132	6.6	20.645	1.8045e-05	5.2767e-05	11.865	18045
133	6.8	21.017	1.2002e-05	3.4722e-05	12.237	12002
134	7	21.397	7.999e-06	2.272e-05	12.616	7999
135	7.2	21.73	5.191e-06	1.4721e-05	12.949	5191
136	7.4	22.078	3.431e-06	9.53e-06	13.298	3431
137	7.6	22.421	2.183e-06	6.099e-06	13.641	2183
138	7.8	22.814	1.448e-06	3.916e-06	14.033	1448
139	8	23.164	9.63e-07	2.468e-06	14.384	963
140	8.2	23.409	5.43e-07	1.505e-06	14.629	543
141	8.4	23.924	3.69e-07	9.62e-07	15.144	369
142	8.6	24.405	2.27e-07	5.93e-07	15.625	227
143	8.8	24.591	1.49e-07	3.66e-07	15.81	149
144	9	24.963	8.2e-08	2.17e-07	16.183	82
145	9.2	25.213	4.7e-08	1.35e-07	16.433	47
146	9.4	25.658	3.8e-08	8.8e-08	16.878	38
147	9.6	26	2.5e-08	5e-08	17.22	25
148	9.8	26	5e-09	2.5e-08	17.22	5
149	10	26.4	1e-08	2e-08	17.62	10
150	10.2	27.5	2e-09	1e-08	18.72	2
151	10.4	27	4e-09	8e-09	18.22	4
152	10.6	28	2e-09	4e-09	19.22	2
153	10.8	27	2e-09	2e-09	18.22	2
154	11	0	0	0	0	0
155	11.2	0	0	0	0	0
156	11.4	0	0	0	0	0
157	11.6	0	0	0	0	0
158	11.8	0	0	0	0	0
159	12	0	0	0	0	0
160	12.2	0	0	0	0	0
161	12.4	0	0	0	0	0
162	12.6	0	0	0	0	0
163	12.8	0	0	0	0	0
164	13	0	0	0	0	0
165	13.2	0	0	0	0	0
166	13.4	0	0	0	0	0
167	13.6	0	0	0	0	0
168	13.8	0	0	0	0	0
169	14	0	0	0	0	0
170	14.2	0	0	0	0	0
171	14.4	0	0	0	0	0
172	14.6	0	0	0	0	0
173	14.8	0	0	0	0	0
174	15	0	0	0	0	0
175	15.2	0	0	0	0	0
176	15.4	0	0	0	0	0
177	15.6	0	0	0	0	0
178	15.8	0	0	0	0	0
179	16	0	0	0	0	0
180	16.2	0	0	0	0	0
181	16.4	0	0	0	0	0
182	16.6	0	0	0	0	0
183	16.8	0	0	0	0	0
184	17	0	0	0	0	0
185	17.2	0	0	0	0	0
186	17.4	0	0	0	0	0
187	17.6	0	0	0	0	0
188	17.8	0	0	0	0	0
189	18	0	0	0	0	0
190	18.2	0	0	0	0	0
191	18.4	0	0	0	0	0
192	18.6	0	0	0	0	0
193	18.8	0	0	0	0	0
194	19	0	0	0	0	0
195	19.2	0	0	0	0	0
196	19.4	0	0	0	0	0
197	19.6	0	0	0	0	0
198	19.8	0	0	0	0	0
199	20	0	0	0	0	0
