# Supplementary material for: Quantifying the Potential for Future Gene Therapy to Lower Lifetime Risk of Polygenic Late-Onset Diseases
Source: MDPI journal article supplement (doi:10.3390/ijms20133352), 2019-07-08
Supplement: s2 [file s2 › SuppFiles/Results/LODsRareMedium/ColorectalCancer/0.250/FrailtyAnalysis.csv]

Age	Heritability	MeanOR	CaseOR	nControls	nCases	nCumIncidence	nIncidence	nLifeIncidence0	nAbsIncidence0	nLifeIncidence5	nAbsIncidence5	nLifeIncidence10	nAbsIncidence10	nLifeIncidence15	nAbsIncidence15	nIncActDivExp
24	0.386693	0.250016	3.64315	999999541	459	4.59e-07	4.59e-07	4.53237e-07	4.53237e-07	4.54807e-07	4.54807e-07	4.55491e-07	4.55491e-07	4.55716e-07	4.55716e-07	0.263884
25	0.386692	0.250016	3.34684	999998658	883	1.342e-06	8.83e-07	1.32437e-06	8.71137e-07	1.32928e-06	8.74475e-07	1.33159e-06	8.76104e-07	1.33231e-06	8.76589e-07	0.238248
26	0.386691	0.250015	3.50367	999997138	1520	2.862e-06	1.52e-06	2.82258e-06	1.49821e-06	2.83369e-06	1.5044e-06	2.83938e-06	1.50779e-06	2.84114e-06	1.50884e-06	0.256377
27	0.386689	0.250013	3.75917	999994997	2141	5.003e-06	2.14101e-06	4.93092e-06	2.10834e-06	4.95124e-06	2.11756e-06	4.96255e-06	2.12317e-06	4.96621e-06	2.12507e-06	0.253672
28	0.386686	0.250011	3.6118	999992145	2852	7.855e-06	2.85201e-06	7.73671e-06	2.80578e-06	7.76983e-06	2.81859e-06	7.78975e-06	2.8272e-06	7.79674e-06	2.83052e-06	0.252898
29	0.386683	0.250009	3.47645	999988530	3615	1.147e-05	3.61503e-06	1.12896e-05	3.55293e-06	1.13394e-05	3.56961e-06	1.13717e-05	3.58198e-06	1.13841e-05	3.58736e-06	0.249613
30	0.386678	0.250006	3.54979	999983943	4587	1.6057e-05	4.58705e-06	1.57933e-05	4.50368e-06	1.58648e-05	4.52537e-06	1.59144e-05	4.54271e-06	1.59353e-05	4.55118e-06	0.253389
31	0.386673	0.250002	3.61009	999978432	5511	2.1568e-05	5.51109e-06	2.11985e-05	5.40522e-06	2.12968e-05	5.432e-06	2.13689e-05	5.45446e-06	2.1402e-05	5.46672e-06	0.248342
32	0.386667	0.249998	3.52184	999971663	6769	2.8337e-05	6.76915e-06	2.78304e-05	6.63186e-06	2.79626e-05	6.66574e-06	2.80638e-05	6.69488e-06	2.81146e-05	6.71261e-06	0.252502
33	0.386659	0.249992	3.65948	999963578	8085	3.6422e-05	8.08523e-06	3.57427e-05	7.91234e-06	3.59165e-05	7.95398e-06	3.60541e-05	7.99028e-06	3.61293e-05	8.0147e-06	0.252502
34	0.38665	0.249986	3.53691	999954020	9558	4.598e-05	9.55835e-06	4.50858e-05	9.34304e-06	4.53104e-05	9.39389e-06	4.54921e-05	9.438e-06	4.56e-05	9.47069e-06	0.252175
35	0.38664	0.249979	3.58479	999942925	11095	5.7075e-05	1.10955e-05	5.59181e-05	1.08323e-05	5.62039e-05	1.08935e-05	5.6438e-05	1.09459e-05	5.65879e-05	1.09879e-05	0.249099
36	0.386627	0.24997	3.50649	999929773	13152	7.0227e-05	1.31528e-05	6.87426e-05	1.28244e-05	6.91034e-05	1.28995e-05	6.94015e-05	1.29635e-05	6.96049e-05	1.30171e-05	0.252781
37	0.386613	0.24996	3.54932	999914586	15187	8.5414e-05	1.51881e-05	8.35318e-05	1.47893e-05	8.39827e-05	1.48793e-05	8.43568e-05	1.49553e-05	8.46256e-05	1.50207e-05	0.251129
38	0.386597	0.249948	3.50226	999896948	17638	0.000103052	1.76395e-05	0.000100684	1.71522e-05	0.000101244	1.72613e-05	0.000101709	1.73522e-05	0.000102057	1.74314e-05	0.251984
39	0.386577	0.249935	3.54982	999876468	20480	0.000123532	2.04821e-05	0.000120571	1.98867e-05	0.000121263	2.00194e-05	0.000121837	2.01284e-05	0.00012228	2.02229e-05	0.253695
40	0.386555	0.249919	3.50186	999852828	23640	0.000147172	2.36429e-05	0.00014349	2.29197e-05	0.000144344	2.30803e-05	0.000145048	2.32106e-05	0.000145602	2.33224e-05	0.254702
41	0.38653	0.249901	3.53766	999825896	26932	0.000174104	2.6936e-05	0.000169559	2.6069e-05	0.000170605	2.62613e-05	0.000171463	2.6415e-05	0.000172148	2.65459e-05	0.253065
42	0.386502	0.249881	3.45815	999795203	30693	0.000204797	3.06983e-05	0.000199217	2.96582e-05	0.000200494	2.98892e-05	0.000201534	3.00712e-05	0.000202373	3.02248e-05	0.252125
43	0.386469	0.249858	3.47026	999759897	35306	0.000240103	3.53132e-05	0.00023327	3.40526e-05	0.000234828	3.43335e-05	0.000236086	3.4552e-05	0.000237107	3.47339e-05	0.254075
44	0.386432	0.249831	3.46008	999719775	40122	0.000280225	4.01316e-05	0.000271891	3.8621e-05	0.000273787	3.89597e-05	0.000275306	3.92197e-05	0.00027654	3.94331e-05	0.253435
45	0.38639	0.249801	3.45536	999673518	46257	0.000326482	4.627e-05	0.000316322	4.44308e-05	0.000318635	4.48475e-05	0.000320468	4.51619e-05	0.000321957	4.54167e-05	0.25692
46	0.386342	0.249767	3.40265	999621514	52004	0.000378486	5.2021e-05	0.000366156	4.98339e-05	0.000368972	5.03375e-05	0.000371177	5.07088e-05	0.000372962	5.10058e-05	0.254392
47	0.386288	0.249728	3.45175	999562118	59396	0.000437882	5.94185e-05	0.000422928	5.67722e-05	0.000426366	5.73935e-05	0.000429017	5.78404e-05	0.000431155	5.81926e-05	0.256294
48	0.386226	0.249684	3.43145	999494174	67944	0.000505826	6.79738e-05	0.00048769	6.47615e-05	0.000491898	6.5532e-05	0.000495089	6.60725e-05	0.000497648	6.64931e-05	0.258992
49	0.386156	0.249633	3.40136	999416724	77450	0.000583276	7.74892e-05	0.000561286	7.35961e-05	0.000566451	7.45526e-05	0.000570296	7.52063e-05	0.000573356	7.57081e-05	0.261176
50	0.386077	0.249576	3.39	999329336	87388	0.000670664	8.7439e-05	0.000644046	8.27599e-05	0.000650388	8.39379e-05	0.000655021	8.47253e-05	0.000658675	8.53191e-05	0.261067
51	0.38599	0.249513	3.32633	999231264	98072	0.000768736	9.81378e-05	0.00073658	9.25344e-05	0.000744368	9.39795e-05	0.00074995	9.49293e-05	0.000754305	9.56295e-05	0.259926
52	0.385893	0.249441	3.28989	999120438	110826	0.000879562	0.000110911	0.000840721	0.000104142	0.000850298	0.00010593	0.00085704	0.00010709	0.000862228	0.000107923	0.260959
53	0.385783	0.249361	3.28454	998994729	125709	0.00100527	0.00012582	0.000958321	0.0001176	0.000970119	0.000119821	0.000978286	0.000121246	0.000984475	0.000122246	0.263369
54	0.38566	0.24927	3.25505	998853257	141472	0.00114674	0.000141614	0.00109002	0.000131701	0.00110455	0.000134432	0.00111447	0.00013618	0.00112185	0.000137374	0.264121
55	0.385523	0.249168	3.24207	998694412	158845	0.00130559	0.000159027	0.00123711	0.000147088	0.00125498	0.000150433	0.00126704	0.000152574	0.00127585	0.000154005	0.26469
56	0.385371	0.249055	3.17621	998515520	178892	0.00148448	0.000179126	0.00140181	0.000164696	0.00142377	0.000168791	0.00143847	0.000171427	0.00144901	0.000173159	0.266515
57	0.3852	0.248927	3.17574	998314459	201061	0.00168554	0.00020136	0.00158575	0.000183949	0.00161271	0.000188934	0.00163065	0.000192179	0.00164329	0.000194282	0.268292
58	0.385011	0.248785	3.12018	998089578	224881	0.00191042	0.000225261	0.0017901	0.000204347	0.00182308	0.000210374	0.00184499	0.000214348	0.00186019	0.000216898	0.269286
59	0.384803	0.248627	3.07388	997837754	251824	0.00216225	0.000252306	0.00201726	0.000227157	0.00205751	0.000234431	0.00208429	0.000239293	0.0021026	0.000242403	0.271162
60	0.384572	0.248451	3.05881	997556449	281305	0.00244355	0.000281915	0.00226902	0.000251765	0.002318	0.000260484	0.00235069	0.000266407	0.00237279	0.000270199	0.272981
61	0.384318	0.248256	3.01315	997242694	313755	0.00275731	0.000314524	0.00254748	0.000278459	0.00260685	0.000288857	0.00264673	0.000296039	0.00267346	0.000300662	0.275033
62	0.384039	0.248041	2.97016	996894311	348383	0.00310569	0.000349346	0.00285391	0.000306425	0.00292559	0.000318732	0.0029741	0.00032737	0.00300645	0.000332993	0.276551
63	0.383734	0.247804	2.93775	996508547	385764	0.00349145	0.000386966	0.00318995	0.000336043	0.00327613	0.00035054	0.00333498	0.000360878	0.00337414	0.000367695	0.278049
64	0.383399	0.247543	2.89746	996081061	427486	0.00391894	0.000428984	0.0035585	0.000368553	0.00366174	0.000385612	0.00373294	0.00039796	0.00378036	0.000406214	0.280564
65	0.383037	0.247257	2.84083	995609417	471644	0.00439058	0.0004735	0.00396064	0.00040214	0.00408385	0.000422117	0.00416968	0.000436735	0.00422703	0.000446666	0.282707
66	0.382643	0.246944	2.7952	995090679	518738	0.00490932	0.000521026	0.00439772	0.000437073	0.00454424	0.000460383	0.00464725	0.000477574	0.00471647	0.000489447	0.284874
67	0.382218	0.246605	2.74817	994522959	567720	0.00547704	0.000570521	0.00486998	0.000472266	0.00504358	0.000499347	0.00516665	0.000519401	0.00524995	0.000533478	0.286589
68	0.381762	0.246237	2.69565	993902332	620627	0.00609767	0.000624045	0.00537918	0.000509197	0.00558422	0.000540634	0.00573061	0.000563958	0.00583054	0.00058059	0.288985
69	0.381272	0.245839	2.6445	993225601	676731	0.0067744	0.000680883	0.00592615	0.000546975	0.00616766	0.000583437	0.00634105	0.000610442	0.00646053	0.000629989	0.291698
70	0.380745	0.24541	2.60573	992491274	734327	0.00750873	0.000739336	0.0065101	0.000583944	0.00679377	0.000626113	0.00699827	0.000657215	0.00714051	0.000679976	0.29409
71	0.380185	0.244949	2.56096	991697445	793829	0.00830255	0.000799835	0.00713026	0.000620159	0.00746262	0.000668857	0.00770279	0.000704527	0.00787134	0.000730835	0.296503
72	0.379592	0.244459	2.50475	990842389	855056	0.00915761	0.000862215	0.00778538	0.000655123	0.00817392	0.000711291	0.00845487	0.000752077	0.00865362	0.000782282	0.299
73	0.378968	0.243938	2.45404	989926968	915421	0.010073	0.000923882	0.00847192	0.000686543	0.00892498	0.000751062	0.0092523	0.000797432	0.00948546	0.000831834	0.300851
74	0.378311	0.243385	2.40662	988947745	979223	0.0110523	0.000989187	0.00918931	0.000717384	0.00971644	0.000791467	0.0100965	0.000844227	0.0103688	0.000883303	0.303631
75	0.377623	0.242803	2.35482	987904849	1042896	0.0120952	0.00105455	0.009934	0.000744696	0.0105458	0.000829321	0.0109857	0.00088921	0.0113021	0.000933381	0.306275
76	0.376901	0.242189	2.31617	986796695	1108154	0.0132033	0.00112172	0.0107034	0.000769436	0.0114115	0.000865718	0.0119194	0.000933697	0.0122856	0.000983492	0.309404
77	0.376153	0.241547	2.26419	985627441	1169254	0.0143726	0.0011849	0.0114907	0.000787241	0.0123073	0.000895853	0.0128921	0.000972661	0.0133141	0.00102843	0.311535
78	0.375377	0.240878	2.2167	984395781	1231660	0.0156042	0.00124962	0.0122922	0.000801534	0.0132311	0.000923714	0.0139026	0.00101052	0.014387	0.00107291	0.314291
79	0.374577	0.240183	2.17342	983104371	1291410	0.0168956	0.00131188	0.0131016	0.000809404	0.0141771	0.000946093	0.0149464	0.0010438	0.0155004	0.00111338	0.316715
80	0.373753	0.239464	2.12656	981753537	1350834	0.0182465	0.00137405	0.0139138	0.000812162	0.0151417	0.000964583	0.0160206	0.0010742	0.0166521	0.00115177	0.319468
81	0.372906	0.23872	2.08883	980345278	1408259	0.0196547	0.00143443	0.0147224	0.000808587	0.0161195	0.000977811	0.0171208	0.00110017	0.0178387	0.00118656	0.322195
82	0.37204	0.237956	2.04504	978884054	1461224	0.0211159	0.00149052	0.0155195	0.00079709	0.0171034	0.00098382	0.0182403	0.00111955	0.0190542	0.00121554	0.324401
83	0.371156	0.23717	2.00205	977367212	1516842	0.0226328	0.00154956	0.0163009	0.000781439	0.0180905	0.000987123	0.0193779	0.00113759	0.0202987	0.0012445	0.327698
84	0.370257	0.236369	1.96317	975803666	1563546	0.0241963	0.00159975	0.0170567	0.000755771	0.0190704	0.000979968	0.0205234	0.00114546	0.0215625	0.00126375	0.329592
85	0.369345	0.23555	1.92081	974190459	1613207	0.0258095	0.00165321	0.0177831	0.000726435	0.0200404	0.000969908	0.0216753	0.00115193	0.0228453	0.00128284	0.332637
86	0.368419	0.234716	1.88736	972533885	1656574	0.0274661	0.00170046	0.0184726	0.00068945	0.0209915	0.000951163	0.0228255	0.00115023	0.0241395	0.00129416	0.334898
87	0.367487	0.233871	1.84438	970835367	1698518	0.0291646	0.00174649	0.0191201	0.000647535	0.0219181	0.000926533	0.0239691	0.00114359	0.0254408	0.00130136	0.33738
88	0.366545	0.233014	1.81084	969095900	1739467	0.0309041	0.00179172	0.0197214	0.000601282	0.0228142	0.00089613	0.0251011	0.001132	0.0267454	0.00130456	0.340148
89	0.365599	0.232148	1.77382	967322748	1773152	0.0326773	0.0018297	0.0202707	0.000549314	0.0236713	0.000857088	0.0262125	0.00111134	0.0280444	0.00129902	0.341966
90	0.364645	0.231273	1.74184	965511894	1810854	0.0344881	0.00187203	0.0207669	0.000496183	0.0244867	0.000815437	0.0273012	0.00108874	0.0293375	0.00129307	0.345
91	0.363687	0.23039	1.71014	963671109	1840785	0.0363289	0.00190654	0.0212064	0.000439552	0.0252528	0.000766116	0.0283581	0.00105693	0.0306156	0.00127813	0.346967
92	0.362727	0.229503	1.67596	961799766	1871343	0.0382002	0.00194189	0.0215895	0.000383055	0.0259662	0.000713421	0.029379	0.00102081	0.0318756	0.00125995	0.349444
93	0.361768	0.228611	1.64491	959902936	1896830	0.0400971	0.00197217	0.0219163	0.000326862	0.0266219	0.000655677	0.0303562	0.000977199	0.03311	0.00123441	0.35134
94	0.360808	0.227716	1.61491	957981286	1921650	0.0420187	0.00200192	0.0221896	0.000273278	0.0272172	0.000595318	0.031285	0.000928868	0.0343144	0.00120441	0.353451
95	0.359846	0.226819	1.587	956036964	1944322	0.043963	0.0020296	0.0224129	0.000223335	0.02775	0.000532754	0.0321606	0.000875538	0.0354834	0.00116898	0.355479
96	0.358887	0.225919	1.5584	954068561	1968403	0.0459314	0.00205892	0.0225914	0.000178416	0.02822	0.000470025	0.0329798	0.00081923	0.0366136	0.00113021	0.358048
97	0.357929	0.225018	1.53054	952079953	1988608	0.04792	0.00208434	0.0227302	0.000138884	0.0286271	0.000407058	0.0337379	0.000758127	0.0376983	0.00108478	0.360174
98	0.356975	0.224118	1.50323	950074368	2005585	0.0499256	0.00210653	0.0228356	0.000105373	0.0289727	0.000345602	0.0344312	0.000693271	0.0387316	0.00103323	0.361955
99	0.356024	0.223218	1.47563	948051171	2023197	0.0519488	0.00212951	0.0229137	7.80853e-05	0.0292604	0.000287719	0.035058	0.000626776	0.0397095	0.000977953	0.36407
100	0.355076	0.222317	1.45186	946008618	2042553	0.0539914	0.00215448	0.0229703	5.66094e-05	0.029495	0.000234618	0.0356176	0.00055967	0.0406293	0.000919772	0.366696
101	0.354132	0.22142	1.4302	943957051	2051567	0.0560429	0.00216866	0.0230103	3.9944e-05	0.029681	0.000185954	0.0361075	0.000489883	0.0414831	0.000853842	0.367648
102	0.353192	0.220523	1.40559	941889628	2067423	0.0581104	0.00219017	0.0230379	2.76311e-05	0.0298254	0.000144389	0.0365307	0.000423191	0.0422713	0.000788174	0.36999
103	0.352258	0.21963	1.38206	939811409	2078219	0.0601886	0.00220644	0.0230565	1.85793e-05	0.0299346	0.00010919	0.0368888	0.000358119	0.0429897	0.000718378	0.371576
104	0.351326	0.218738	1.36289	937719962	2091447	0.06228	0.00222539	0.0230686	1.21618e-05	0.0300153	8.07194e-05	0.0371863	0.000297425	0.0436376	0.00064792	0.373731
105	0.3504	0.217849	1.3394	935618445	2101517	0.0643816	0.00224109	0.0230763	7.71257e-06	0.0300735	5.82435e-05	0.0374276	0.000241391	0.0442134	0.000575826	0.375444
106	0.349477	0.216962	1.32049	933504770	2113675	0.0664952	0.00225912	0.0230811	4.73463e-06	0.0301147	4.11533e-05	0.0376192	0.000191584	0.0447182	0.000504714	0.377642
107	0.34856	0.216079	1.29966	931382985	2121785	0.068617	0.00227292	0.0230839	2.79015e-06	0.030143	2.83577e-05	0.0377674	0.000148185	0.0451525	0.000434319	0.379216
108	0.34765	0.215201	1.27913	929253964	2129021	0.070746	0.00228587	0.0230855	1.58612e-06	0.0301621	1.90334e-05	0.0378793	0.000111859	0.0455193	0.000366873	0.380725
109	0.346746	0.214326	1.26032	927116956	2137008	0.072883	0.0022997	0.0230863	8.54803e-07	0.0301745	1.24267e-05	0.0379617	8.24778e-05	0.0458232	0.000303904	0.38245
110	0.345846	0.213454	1.24257	924971244	2145712	0.0750288	0.00231439	0.0230867	4.39871e-07	0.0301824	7.87476e-06	0.0380212	5.94684e-05	0.0460697	0.000246467	0.384377
111	0.344952	0.212586	1.22508	922819630	2151614	0.0771804	0.00232614	0.023087	2.15161e-07	0.0301872	4.81962e-06	0.0380631	4.18919e-05	0.0462647	0.000195022	0.38587
112	0.344064	0.211724	1.20717	920664843	2154787	0.0793352	0.002335	0.0230871	9.69654e-08	0.03019	2.83354e-06	0.0380919	2.87987e-05	0.0464152	0.00015049	0.386933
113	0.343181	0.210865	1.18913	918501355	2163488	0.0814986	0.00234992	0.0230871	4.32698e-08	0.0301916	1.6118e-06	0.0381113	1.93416e-05	0.0465289	0.00011367	0.389042
114	0.342303	0.21001	1.17341	916333062	2168293	0.0836669	0.00236069	0.0230871	1.08415e-08	0.0301925	8.67317e-07	0.0381239	1.26086e-05	0.0466126	8.36853e-05	0.390503
115	0.341431	0.209159	1.15774	914159924	2173138	0.0858401	0.00237156	0.0230871	0	0.0301929	4.45493e-07	0.0381318	7.97542e-06	0.0466728	6.02285e-05	0.392016
116	0.340565	0.208314	1.14301	911983576	2176348	0.0880164	0.00238071	0.0230871	0	0.0301932	2.17635e-07	0.0381367	4.87502e-06	0.0467152	4.23735e-05	0.393275
117	0.339702	0.207471	1.12613	909798962	2184614	0.090201	0.00239545	0.0230871	0	0.0301933	9.83076e-08	0.0381396	2.87277e-06	0.0467444	2.91974e-05	0.395485
118	0.338847	0.206633	1.10995	907609548	2189414	0.0923905	0.00240648	0.0230871	0	0.0301933	4.37883e-08	0.0381412	1.63111e-06	0.046764	1.95734e-05	0.397105
119	0.337995	0.2058	1.09754	905417164	2192384	0.0945828	0.00241556	0.0230871	0	0.0301933	1.09619e-08	0.0381421	8.76954e-07	0.0467767	1.27487e-05	0.398425
120	0.337148	0.20497	1.08425	903221383	2195781	0.0967786	0.00242516	0.0230871	0	0.0301933	0	0.0381425	4.50135e-07	0.0467848	8.05852e-06	0.39985
