# Supplementary material for: Quantifying the Potential for Future Gene Therapy to Lower Lifetime Risk of Polygenic Late-Onset Diseases
Source: MDPI journal article supplement (doi:10.3390/ijms20133352), 2019-07-08
Supplement: s2 [file s2 › SuppFiles/Results/LODsRareMedium/ColorectalCancer/0.250/IndividualsByBetaDistrib.csv]

nEntry	Beta	nDetrimentalCount	nFractionPopulation	nCumulativeFractionPopulation	nEditsNeeded	nIndividuals
0	-19.8	0	0	1	0	0
1	-19.6	0	0	1	0	0
2	-19.4	0	0	1	0	0
3	-19.2	0	0	1	0	0
4	-19	0	0	1	0	0
5	-18.8	0	0	1	0	0
6	-18.6	0	0	1	0	0
7	-18.4	0	0	1	0	0
8	-18.2	0	0	1	0	0
9	-18	0	0	1	0	0
10	-17.8	0	0	1	0	0
11	-17.6	0	0	1	0	0
12	-17.4	0	0	1	0	0
13	-17.2	0	0	1	0	0
14	-17	0	0	1	0	0
15	-16.8	0	0	1	0	0
16	-16.6	0	0	1	0	0
17	-16.4	0	0	1	0	0
18	-16.2	0	0	1	0	0
19	-16	0	0	1	0	0
20	-15.8	0	0	1	0	0
21	-15.6	0	0	1	0	0
22	-15.4	0	0	1	0	0
23	-15.2	0	0	1	0	0
24	-15	0	0	1	0	0
25	-14.8	0	0	1	0	0
26	-14.6	0	0	1	0	0
27	-14.4	0	0	1	0	0
28	-14.2	0	0	1	0	0
29	-14	0	0	1	0	0
30	-13.8	0	0	1	0	0
31	-13.6	0	0	1	0	0
32	-13.4	0	0	1	0	0
33	-13.2	0	0	1	0	0
34	-13	0	0	1	0	0
35	-12.8	0	0	1	0	0
36	-12.6	0	0	1	0	0
37	-12.4	0	0	1	0	0
38	-12.2	0	0	1	0	0
39	-12	0	0	1	0	0
40	-11.8	0	0	1	0	0
41	-11.6	0	0	1	0	0
42	-11.4	0	0	1	0	0
43	-11.2	0	0	1	0	0
44	-11	0	0	1	0	0
45	-10.8	0	0	1	0	0
46	-10.6	0	0	1	0	0
47	-10.4	0	0	1	0	0
48	-10.2	0	0	1	0	0
49	-10	0	0	1	0	0
50	-9.8	0	0	1	0	0
51	-9.6	0	0	1	0	0
52	-9.4	0	0	1	0	0
53	-9.2	0	0	1	0	0
54	-9	0	0	1	0	0
55	-8.8	0	0	1	0	0
56	-8.6	0	0	1	0	0
57	-8.4	0	0	1	0	0
58	-8.2	0	0	1	0	0
59	-8	0	0	1	0	0
60	-7.8	0	0	1	0	0
61	-7.6	0	0	1	0	0
62	-7.4	0	0	1	0	0
63	-7.2	0	0	1	0	0
64	-7	0	0	1	0	0
65	-6.8	0	0	1	0	0
66	-6.6	0	0	1	0	0
67	-6.4	0	0	1	0	0
68	-6.2	0	0	1	0	0
69	-6	0	0	1	0	0
70	-5.8	0	0	1	0	0
71	-5.6	0	0	1	0	0
72	-5.4	0	0	1	0	0
73	-5.2	0	0	1	0	0
74	-5	0	0	1	0	0
75	-4.8	0	0	1	0	0
76	-4.6	0	0	1	0	0
77	-4.4	0	0	1	0	0
78	-4.2	0	0.000135323	1	0	135323
79	-4	1	0.000249321	0.99986468	0	249321
80	-3.8	1.307	0.00071982	0.99961536	0	719820
81	-3.6	1.789	0.001770508	0.99889554	0	1770508
82	-3.4	2.2278	0.001796335	0.99712503	0	1796335
83	-3.2	2.6764	0.004100619	0.99532869	0	4100619
84	-3	2.95	0.005789935	0.99122807	0	5789935
85	-2.8	3.4594	0.008105889	0.98543814	0	8105889
86	-2.6	3.9004	0.013591503	0.97733225	0	13591503
87	-2.4	4.1596	0.015926417	0.96374075	0	15926417
88	-2.2	4.6618	0.019815197	0.94781433	0	19815197
89	-2	5.0465	0.02782518	0.92799913	0	27825180
90	-1.8	5.3428	0.030521666	0.90017395	0	30521666
91	-1.6	5.8365	0.035457839	0.86965229	0	35457839
92	-1.4	6.1826	0.043654915	0.83419445	0	43654915
93	-1.2	6.5022	0.045267297	0.79053953	0	45267297
94	-1	6.9737	0.04899703	0.74527224	0	48997030
95	-0.8	7.31	0.054133415	0.69627521	0	54133415
96	-0.6	7.6523	0.053670345	0.64214179	0	53670345
97	-0.4	8.08	0.055181636	0.58847145	0	55181636
98	-0.2	8.4171	0.056423818	0.53328981	0	56423818
99	0	8.7801	0.053540538	0.47686599	0	53540538
100	0.2	9.1882	0.051752926	0.42332545	0.40812	51752926
101	0.4	9.5254	0.049460253	0.37157253	0.7453	49460253
102	0.6	9.8859	0.045071398	0.32211228	1.1058	45071398
103	0.8	10.29	0.041211162	0.27704088	1.5095	41211162
104	1	10.632	0.037675308	0.23582971	1.8521	37675308
105	1.2	10.989	0.033061945	0.19815441	2.2091	33061945
106	1.4	11.373	0.029026948	0.16509246	2.5924	29026948
107	1.6	11.726	0.02508079	0.13606551	2.9463	25080790
108	1.8	12.081	0.02126309	0.11098472	3.3013	21263090
109	2	12.458	0.018054222	0.089721634	3.6783	18054222
110	2.2	12.804	0.015009612	0.071667412	4.0241	15009612
111	2.4	13.168	0.012221908	0.0566578	4.3879	12221908
112	2.6	13.543	0.009932936	0.044435892	4.7632	9932936
113	2.8	13.896	0.007988622	0.034502956	5.1156	7988622
114	3	14.25	0.00632172	0.026514334	5.4699	6321720
115	3.2	14.626	0.004949613	0.020192614	5.8456	4949613
116	3.4	14.961	0.003830834	0.015243001	6.1805	3830834
117	3.6	15.329	0.00295327	0.011412167	6.5489	2953270
118	3.8	15.693	0.002246905	0.008458897	6.9126	2246905
119	4	16.043	0.00168795	0.006211992	7.2625	1687950
120	4.2	16.397	0.001255452	0.004524042	7.6171	1255452
121	4.4	16.763	0.000931611	0.00326859	7.9833	931611
122	4.6	17.117	0.000675338	0.002336979	8.3368	675338
123	4.8	17.471	0.000492925	0.001661641	8.6907	492925
124	5	17.828	0.000352563	0.001168716	9.0479	352563
125	5.2	18.185	0.000251719	0.000816153	9.4051	251719
126	5.4	18.541	0.000175994	0.000564434	9.761	175994
127	5.6	18.9	0.000122975	0.00038844	10.12	122975
128	5.8	19.24	8.5714e-05	0.000265465	10.46	85714
129	6	19.606	5.9034e-05	0.000179751	10.826	59034
130	6.2	19.95	4.0299e-05	0.000120717	11.17	40299
131	6.4	20.315	2.7224e-05	8.0418e-05	11.535	27224
132	6.6	20.667	1.8339e-05	5.3194e-05	11.887	18339
133	6.8	21.041	1.2239e-05	3.4855e-05	12.261	12239
134	7	21.376	7.962e-06	2.2616e-05	12.596	7962
135	7.2	21.75	5.269e-06	1.4654e-05	12.97	5269
136	7.4	22.059	3.402e-06	9.385e-06	13.279	3402
137	7.6	22.445	2.185e-06	5.983e-06	13.665	2185
138	7.8	22.848	1.419e-06	3.798e-06	14.068	1419
139	8	23.163	8.97e-07	2.379e-06	14.383	897
140	8.2	23.526	5.55e-07	1.482e-06	14.746	555
141	8.4	23.824	3.74e-07	9.27e-07	15.043	374
142	8.6	24.078	2.06e-07	5.53e-07	15.298	206
143	8.8	24.577	1.37e-07	3.47e-07	15.797	137
144	9	24.815	9.2e-08	2.1e-07	16.035	92
145	9.2	25.138	5.8e-08	1.18e-07	16.358	58
146	9.4	25.6	2.5e-08	6e-08	16.82	25
147	9.6	25.857	1.4e-08	3.5e-08	17.077	14
148	9.8	26	8e-09	2.1e-08	17.22	8
149	10	26.333	6e-09	1.3e-08	17.553	6
150	10.2	27	3e-09	7e-09	18.22	3
151	10.4	26.5	2e-09	4e-09	17.72	2
152	10.6	29	1e-09	2e-09	20.22	1
153	10.8	0	0	1e-09	0	0
154	11	28	1e-09	1e-09	19.22	1
155	11.2	0	0	0	0	0
156	11.4	0	0	0	0	0
157	11.6	0	0	0	0	0
158	11.8	0	0	0	0	0
159	12	0	0	0	0	0
160	12.2	0	0	0	0	0
161	12.4	0	0	0	0	0
162	12.6	0	0	0	0	0
163	12.8	0	0	0	0	0
164	13	0	0	0	0	0
165	13.2	0	0	0	0	0
166	13.4	0	0	0	0	0
167	13.6	0	0	0	0	0
168	13.8	0	0	0	0	0
169	14	0	0	0	0	0
170	14.2	0	0	0	0	0
171	14.4	0	0	0	0	0
172	14.6	0	0	0	0	0
173	14.8	0	0	0	0	0
174	15	0	0	0	0	0
175	15.2	0	0	0	0	0
176	15.4	0	0	0	0	0
177	15.6	0	0	0	0	0
178	15.8	0	0	0	0	0
179	16	0	0	0	0	0
180	16.2	0	0	0	0	0
181	16.4	0	0	0	0	0
182	16.6	0	0	0	0	0
183	16.8	0	0	0	0	0
184	17	0	0	0	0	0
185	17.2	0	0	0	0	0
186	17.4	0	0	0	0	0
187	17.6	0	0	0	0	0
188	17.8	0	0	0	0	0
189	18	0	0	0	0	0
190	18.2	0	0	0	0	0
191	18.4	0	0	0	0	0
192	18.6	0	0	0	0	0
193	18.8	0	0	0	0	0
194	19	0	0	0	0	0
195	19.2	0	0	0	0	0
196	19.4	0	0	0	0	0
197	19.6	0	0	0	0	0
198	19.8	0	0	0	0	0
199	20	0	0	0	0	0
