# Supplementary material for: Quantifying the Potential for Future Gene Therapy to Lower Lifetime Risk of Polygenic Late-Onset Diseases
Source: MDPI journal article supplement (doi:10.3390/ijms20133352), 2019-07-08
Supplement: s2 [file s2 › SuppFiles/Results/LODsRareMedium/ColorectalCancer/1.000/FrailtyAnalysis.csv]

Age	Heritability	MeanOR	CaseOR	nControls	nCases	nCumIncidence	nIncidence	nLifeIncidence0	nAbsIncidence0	nLifeIncidence5	nAbsIncidence5	nLifeIncidence10	nAbsIncidence10	nLifeIncidence15	nAbsIncidence15	nIncActDivExp
24	0.386691	0.99999	13.432	999998284	1716	1.716e-06	1.716e-06	1.69446e-06	1.69446e-06	1.70032e-06	1.70032e-06	1.70288e-06	1.70288e-06	1.70372e-06	1.70372e-06	0.986545
25	0.386688	0.99998	14.3143	999994551	3733	5.449e-06	3.73301e-06	5.3773e-06	3.68285e-06	5.39728e-06	3.69696e-06	5.40673e-06	3.70385e-06	5.40962e-06	3.7059e-06	1.00723
26	0.386682	0.999964	14.5603	999988663	5888	1.1337e-05	5.88803e-06	1.11809e-05	5.80363e-06	1.12249e-05	5.82762e-06	1.12474e-05	5.84072e-06	1.12544e-05	5.84478e-06	0.993128
27	0.386674	0.999941	14.6802	999980107	8556	1.9893e-05	8.5561e-06	1.96064e-05	8.42557e-06	1.96872e-05	8.46241e-06	1.97321e-05	8.48482e-06	1.97467e-05	8.49244e-06	1.01375
28	0.386663	0.999911	13.9894	999968788	11319	3.1212e-05	1.13192e-05	3.0742e-05	1.11358e-05	3.08736e-05	1.11866e-05	3.09527e-05	1.12208e-05	3.09805e-05	1.1234e-05	1.00371
29	0.386649	0.999873	14.1757	999954148	14640	4.5852e-05	1.46405e-05	4.51306e-05	1.43891e-05	4.53298e-05	1.44566e-05	4.5459e-05	1.45067e-05	4.55086e-05	1.45285e-05	1.01091
30	0.386633	0.999825	14.3367	999936316	17832	6.3684e-05	1.78328e-05	6.26387e-05	1.75089e-05	6.29222e-05	1.75932e-05	6.31188e-05	1.76606e-05	6.32013e-05	1.76935e-05	0.985084
31	0.386612	0.999767	14.1242	999914315	22001	8.5685e-05	2.20024e-05	8.42174e-05	2.15801e-05	8.46078e-05	2.1687e-05	8.48941e-05	2.17767e-05	8.50255e-05	2.18256e-05	0.991479
32	0.386587	0.999696	13.9889	999887596	26719	0.000112404	2.67213e-05	0.000110395	2.61799e-05	0.000110919	2.63137e-05	0.000111321	2.64287e-05	0.000111522	2.64987e-05	0.996754
33	0.386557	0.999612	13.9394	999855379	32217	0.000144621	3.22206e-05	0.000141924	3.15326e-05	0.000142614	3.16985e-05	0.00014316	3.18432e-05	0.000143459	3.19405e-05	1.00625
34	0.386521	0.999511	14.1494	999817335	38044	0.000182665	3.80495e-05	0.000179112	3.71938e-05	0.000180005	3.73962e-05	0.000180726	3.75718e-05	0.000181155	3.77019e-05	1.00385
35	0.38648	0.999394	13.8575	999772735	44600	0.000227265	4.46081e-05	0.000222657	4.35521e-05	0.000223795	4.37978e-05	0.000224727	4.40088e-05	0.000225325	4.41775e-05	1.00147
36	0.386432	0.999257	13.8609	999720666	52069	0.000279334	5.20808e-05	0.000273429	5.07838e-05	0.000274864	5.10811e-05	0.00027605	5.13343e-05	0.000276859	5.15465e-05	1.00093
37	0.386377	0.999098	13.8325	999660387	60279	0.000339613	6.02958e-05	0.000332129	5.87167e-05	0.000333922	5.90742e-05	0.000335409	5.9376e-05	0.000336478	5.96356e-05	0.996969
38	0.386313	0.998916	13.7422	999590670	69717	0.00040933	6.97407e-05	0.000399926	6.78197e-05	0.00040215	6.82514e-05	0.000403997	6.86105e-05	0.000405379	6.89237e-05	0.99626
39	0.38624	0.998705	13.7282	999510208	80462	0.000489792	8.04949e-05	0.000478057	7.8163e-05	0.000480803	7.86846e-05	0.000483077	7.91129e-05	0.00048483	7.94843e-05	0.997024
40	0.386157	0.998463	13.4265	999417076	93132	0.000582924	9.31776e-05	0.000568351	9.03385e-05	0.00057173	9.09717e-05	0.000574517	9.14851e-05	0.000576711	9.19258e-05	1.00379
41	0.386063	0.998188	13.1951	999310370	106706	0.00068963	0.000106768	0.000671638	0.000103347	0.000675778	0.000104109	0.000679175	0.000104719	0.000681888	0.000105238	1.00309
42	0.385956	0.997877	13.3018	999189955	120415	0.000810045	0.000120498	0.000787993	0.000116436	0.00079304	0.000117342	0.00079715	0.000118057	0.000800466	0.00011866	0.989647
43	0.385835	0.997519	13.193	999051110	138845	0.00094889	0.000138958	0.000921909	0.000134025	0.00092806	0.00013513	0.00093303	0.00013599	0.000937061	0.000136706	0.999783
44	0.385697	0.997114	13.0707	998893444	157666	0.00110656	0.000157816	0.00107368	0.000151912	0.00108116	0.000153244	0.00108715	0.000154266	0.00109202	0.000155106	0.996622
45	0.385543	0.996654	12.8096	998713295	180149	0.0012867	0.000180349	0.00124671	0.000173228	0.00125582	0.000174853	0.00126303	0.000176079	0.0012689	0.000177073	1.00141
46	0.385369	0.996134	12.7311	998508739	204556	0.00149126	0.00020482	0.00144273	0.000196272	0.00145382	0.000198256	0.0014625	0.000199719	0.00146953	0.000200888	1.0016
47	0.385173	0.995547	12.6289	998276935	231804	0.00172306	0.00023215	0.0016643	0.000221895	0.00167781	0.000224323	0.00168823	0.00022607	0.00169663	0.000227447	1.00135
48	0.384955	0.994888	12.3967	998014894	262041	0.00198511	0.000262493	0.00191406	0.000250198	0.00193055	0.000253175	0.00194305	0.000255263	0.00195308	0.000256888	1.00015
49	0.384713	0.994148	12.2219	997718966	295928	0.00228103	0.000296517	0.00219527	0.000281762	0.0022154	0.000285424	0.00223041	0.000287927	0.00224235	0.000289848	0.999402
50	0.384442	0.993318	12.0736	997385065	333901	0.00261494	0.000334664	0.00251148	0.000316941	0.00253612	0.000321452	0.00255413	0.000324467	0.00256835	0.000326741	0.99921
51	0.384142	0.992389	11.863	997009253	375812	0.00299075	0.000376797	0.00286608	0.000355521	0.00289625	0.000361074	0.0029179	0.000364723	0.0029348	0.000367413	0.997977
52	0.383809	0.991351	11.6676	996585741	423512	0.00341426	0.000424782	0.00326404	0.000399162	0.00330106	0.000406018	0.00332714	0.000410461	0.00334722	0.000413657	0.999456
53	0.383441	0.990194	11.4007	996109505	476236	0.00389049	0.000477868	0.00370956	0.00044704	0.00375498	0.000455484	0.00378647	0.000460903	0.00381034	0.000464705	1.00029
54	0.383033	0.988902	11.2798	995575211	534294	0.00442479	0.000536381	0.00420695	0.000499333	0.00426269	0.00050969	0.00430077	0.000516315	0.00432915	0.000520842	1.00039
55	0.382581	0.987462	11.0986	994975792	599419	0.00502421	0.000602083	0.004762	0.00055752	0.00483037	0.000570197	0.00487653	0.000578313	0.00491031	0.000583738	1.00212
56	0.382087	0.985873	10.8178	994306933	668859	0.00569307	0.000672236	0.00537778	0.000618891	0.00546146	0.000634279	0.00551747	0.000644184	0.00555773	0.000650695	1.0002
57	0.381544	0.984113	10.6389	993560428	746505	0.00643957	0.000750779	0.00606075	0.00068688	0.00616294	0.000705496	0.006231	0.000717614	0.00627907	0.000725467	1.00034
58	0.380951	0.982172	10.4129	992729726	830702	0.00727027	0.000836086	0.0068156	0.000759743	0.00694005	0.00078215	0.00702279	0.000796924	0.00708028	0.000806405	0.999493
59	0.380305	0.980038	10.1552	991806321	923405	0.00819368	0.000930168	0.00764856	0.000839053	0.00779968	0.000865921	0.00790025	0.000883882	0.00796914	0.00089537	0.999685
60	0.379604	0.977697	9.90568	990781980	1024341	0.00921802	0.0010328	0.00856533	0.000924349	0.0087482	0.000956361	0.00887034	0.000978106	0.00895304	0.000992028	1.00007
61	0.378845	0.975141	9.64656	989650067	1131913	0.0103499	0.00114244	0.00956991	0.00101392	0.00979029	0.00105179	0.00993834	0.00107794	0.0100377	0.00109477	0.999001
62	0.378024	0.972351	9.41079	988400936	1249131	0.0115991	0.00126219	0.0106686	0.00111018	0.0109331	0.00115477	0.0111121	0.00118607	0.0112317	0.00120644	0.999184
63	0.377138	0.969313	9.17652	987024920	1376016	0.0129751	0.00139216	0.0118673	0.00121273	0.0121835	0.00126505	0.0123994	0.00130236	0.0125432	0.00132695	1.00032
64	0.376187	0.966023	8.92643	985515903	1509017	0.0144841	0.00152885	0.0131682	0.00131809	0.0135447	0.0013791	0.0138042	0.00142326	0.0139772	0.00145278	0.999902
65	0.375169	0.962471	8.68191	983865146	1650757	0.0161349	0.00167502	0.0145757	0.00142818	0.0150221	0.00149912	0.0153327	0.00155104	0.0155405	0.00158631	1.00008
66	0.374085	0.958649	8.42563	982063877	1801269	0.0179361	0.00183081	0.0160934	0.00154258	0.0166207	0.00162485	0.0169911	0.00168552	0.0172401	0.00172743	1.00101
67	0.372932	0.954552	8.20001	980108248	1955629	0.0198918	0.00199135	0.0177203	0.00165653	0.0183408	0.00175152	0.0187803	0.00182186	0.0190777	0.00187124	1.00031
68	0.371712	0.950175	7.96381	977989566	2118682	0.0220104	0.00216168	0.0194585	0.00177356	0.0201864	0.00188306	0.0207055	0.0019643	0.0210597	0.00202223	1.00104
69	0.370427	0.945533	7.71268	975707419	2282147	0.0242926	0.00233351	0.0213031	0.00188608	0.022154	0.00201181	0.0227641	0.00210493	0.0231843	0.00217233	0.999701
70	0.369077	0.940614	7.48824	973254259	2453160	0.0267457	0.00251424	0.0232539	0.00199935	0.0242456	0.00214373	0.0249596	0.00225022	0.0254558	0.00232815	1.0001
71	0.367665	0.935429	7.24621	970626567	2627692	0.0293734	0.0026999	0.0253067	0.00210923	0.0264596	0.00227486	0.0272917	0.00239618	0.027875	0.00248565	1.00087
72	0.366195	0.929989	7.0288	967827832	2798735	0.0321722	0.00288343	0.027451	0.00220921	0.0287878	0.00239863	0.0297534	0.00253617	0.0304356	0.00263802	0.999921
73	0.364668	0.924301	6.81249	964855041	2972791	0.035145	0.00307161	0.0296805	0.00230363	0.0312268	0.00252012	0.032343	0.00267571	0.0331369	0.00279114	1.00023
74	0.363093	0.918389	6.59135	961713861	3141180	0.0382861	0.0032556	0.0319818	0.00238507	0.0337657	0.00263137	0.0350512	0.00280678	0.0359704	0.0029367	0.999306
75	0.361467	0.912253	6.40125	958404526	3309335	0.0415955	0.00344108	0.0343449	0.00245716	0.0363973	0.00273638	0.0378728	0.00293399	0.0389322	0.00307973	0.999397
76	0.359799	0.905918	6.19693	954931369	3473157	0.0450686	0.00362389	0.0367564	0.00251621	0.0391107	0.00283108	0.0407992	0.00305338	0.0420146	0.00321622	0.999576
77	0.358087	0.899393	6.01716	951299827	3631542	0.0487002	0.00380294	0.0392015	0.00256046	0.0418931	0.00291371	0.0438201	0.00316353	0.0452088	0.00334493	0.999871
78	0.356347	0.892716	5.81663	947517287	3782540	0.0524827	0.00397618	0.0416631	0.0025876	0.0447299	0.00298204	0.0469236	0.00326228	0.0485038	0.00346369	1.00005
79	0.354574	0.885895	5.64923	943594414	3922873	0.0564056	0.00414016	0.0441218	0.00259489	0.0476038	0.0030331	0.0500943	0.00334633	0.0518859	0.0035694	0.99952
80	0.352778	0.878949	5.48109	939536578	4057836	0.0604634	0.0043004	0.0465615	0.00258553	0.0505013	0.00307077	0.0533211	0.00341972	0.0553458	0.00366667	0.999849
81	0.350962	0.871905	5.31224	935352896	4183682	0.0646471	0.00445292	0.0489636	0.00255676	0.0534062	0.00309184	0.0565895	0.00347873	0.0588708	0.0037519	1.00019
82	0.349136	0.864788	5.14957	931056136	4296760	0.0689439	0.00459373	0.0513075	0.00250586	0.0562992	0.00309289	0.0598816	0.0035196	0.0624451	0.00382136	0.999792
83	0.347299	0.857608	4.99863	926652922	4403214	0.0733471	0.00472927	0.0535759	0.0024364	0.0591647	0.00307769	0.0631839	0.00354683	0.0660578	0.00388015	1.00013
84	0.345454	0.850384	4.85672	922154076	4498846	0.0778459	0.00485494	0.0557505	0.00234673	0.0619844	0.00304288	0.0664797	0.00355675	0.069694	0.00392406	1.00025
85	0.343607	0.843131	4.71835	917567420	4586656	0.0824326	0.00497385	0.0578159	0.00223975	0.064742	0.00299043	0.0697549	0.00355165	0.0733414	0.00395526	1.00077
86	0.341764	0.835877	4.58613	912909949	4657471	0.0870901	0.00507589	0.0597543	0.00211253	0.0674162	0.00291445	0.0729888	0.00352439	0.0769799	0.00396541	0.999671
87	0.339926	0.828629	4.45462	908182579	4727370	0.0918174	0.00517835	0.0615565	0.00197417	0.069995	0.00282477	0.0761716	0.00348651	0.0806019	0.00396752	1.00034
88	0.338095	0.821401	4.33502	903399584	4782995	0.0966004	0.00526656	0.0632099	0.00182049	0.0724591	0.0027132	0.0792843	0.00342734	0.084189	0.00394979	0.999826
89	0.336275	0.814208	4.2163	898567703	4831881	0.101432	0.00534855	0.0647068	0.00165696	0.0747946	0.00258533	0.0823127	0.00335226	0.0877289	0.00391838	0.999632
90	0.334464	0.807047	4.10565	893687858	4879845	0.106312	0.00543069	0.0660439	0.00148804	0.0769921	0.00244547	0.0852466	0.0032651	0.0912134	0.00387787	1.00083
91	0.332665	0.799934	4.00516	888776575	4911283	0.111223	0.00549552	0.0672166	0.00131225	0.0790361	0.00228718	0.0880666	0.00315539	0.0946235	0.00381576	1.00012
92	0.330886	0.792886	3.89631	883836265	4940310	0.116164	0.00555855	0.0682279	0.00113781	0.0809195	0.00211911	0.0907615	0.00303216	0.0979497	0.00374249	1.00027
93	0.329125	0.785905	3.7977	878874594	4961671	0.121125	0.00561379	0.0690829	0.000967368	0.0826346	0.00194052	0.0933176	0.00289208	0.101179	0.00365331	1.00009
94	0.327381	0.778989	3.70163	873890370	4984224	0.12611	0.00567114	0.0697917	0.000806493	0.0841787	0.00175689	0.0957268	0.00274126	0.104303	0.00355445	1.00127
95	0.325658	0.772156	3.61203	868899601	4990769	0.1311	0.00571098	0.0703649	0.000655992	0.0855462	0.00156484	0.0979742	0.00257168	0.107303	0.00343361	1.00026
96	0.323955	0.7654	3.52756	863902091	4997510	0.136098	0.00575154	0.0708179	0.00052132	0.0867395	0.00137338	0.100054	0.00239373	0.110173	0.00330239	1.0002
97	0.322274	0.758731	3.44258	858903645	4998446	0.141096	0.00578589	0.071167	0.000404087	0.0877627	0.00118434	0.10196	0.00220579	0.112899	0.00315618	0.999799
98	0.320615	0.752148	3.36325	853906312	4997333	0.146094	0.00581827	0.0714296	0.000305692	0.0886238	0.0010026	0.103687	0.0020112	0.115474	0.00299743	0.999725
99	0.318972	0.745642	3.28959	848907796	4998516	0.151092	0.00585371	0.0716225	0.000225924	0.0893347	0.000832455	0.105236	0.00181345	0.11789	0.00282951	1.00077
100	0.317353	0.739229	3.21686	843921584	4986212	0.156078	0.00587368	0.0717607	0.000162789	0.0899074	0.00067468	0.106602	0.00160942	0.120135	0.00264495	0.999711
101	0.315757	0.732909	3.14342	838945390	4976194	0.161055	0.00589651	0.0718576	0.000114805	0.0903584	0.00053446	0.10779	0.001408	0.122206	0.00245407	0.999624
102	0.314179	0.72667	3.0811	833980530	4964860	0.166019	0.00591798	0.0719239	7.90938e-05	0.0907052	0.000413312	0.108806	0.00121138	0.124099	0.00225614	0.999737
103	0.312625	0.720527	3.01176	829030075	4950455	0.17097	0.00593594	0.0719682	5.30673e-05	0.0909653	0.000311874	0.109659	0.00102288	0.12581	0.00205187	0.999643
104	0.311089	0.714462	2.95348	824092529	4937546	0.175907	0.00595581	0.0719969	3.4633e-05	0.0911559	0.000229865	0.110362	0.000846976	0.12734	0.00184508	1.00022
105	0.309575	0.708492	2.89039	819173983	4918546	0.180826	0.00596844	0.0720149	2.19042e-05	0.0912922	0.000165415	0.110927	0.000685565	0.128688	0.00163538	0.999877
106	0.308082	0.702605	2.83318	814272322	4901661	0.185728	0.00598366	0.0720259	1.34034e-05	0.0913876	0.000116502	0.111371	0.000542359	0.129858	0.00142881	1.00025
107	0.306606	0.696799	2.78036	809389852	4882470	0.19061	0.00599611	0.0720323	7.88489e-06	0.0914529	8.01381e-05	0.111712	0.000418769	0.130857	0.00122737	1.0004
108	0.30515	0.691079	2.72516	804526627	4863225	0.195473	0.00600851	0.072036	4.47634e-06	0.0914963	5.37161e-05	0.111967	0.000315687	0.131695	0.00103539	1.00075
109	0.303719	0.68545	2.6696	799686857	4839770	0.200313	0.00601567	0.0720379	2.40627e-06	0.0915245	3.49811e-05	0.112154	0.000232175	0.132384	0.000855489	1.00043
110	0.302306	0.679903	2.62013	794870253	4816604	0.20513	0.00602311	0.0720389	1.23474e-06	0.0915422	2.21048e-05	0.112288	0.000166931	0.132937	0.000691845	1.00032
111	0.300912	0.674439	2.57208	790079188	4791065	0.209921	0.00602748	0.0720394	6.02748e-07	0.0915529	1.35016e-05	0.112381	0.000117355	0.133371	0.000546331	0.999863
112	0.299536	0.669051	2.5268	785310627	4768561	0.214689	0.00603555	0.0720396	2.716e-07	0.0915592	7.93675e-06	0.112445	8.06651e-05	0.133704	0.000421523	1.00015
113	0.298177	0.663741	2.47991	780562711	4747916	0.219437	0.00604591	0.0720397	1.20918e-07	0.0915627	4.5042e-06	0.112487	5.40504e-05	0.133954	0.000317652	1.00093
114	0.296837	0.658512	2.43664	775844000	4718711	0.224156	0.00604527	0.0720397	3.02263e-08	0.0915646	2.41811e-06	0.112515	3.51532e-05	0.134136	0.000233317	1
115	0.295514	0.653358	2.39552	771152053	4691947	0.228848	0.00604754	0.0720397	0	0.0915655	1.23975e-06	0.112532	2.21945e-05	0.134266	0.000167608	0.999651
116	0.294206	0.648271	2.35577	766480591	4671462	0.233519	0.00605777	0.0720397	0	0.091566	6.05777e-07	0.112542	1.35694e-05	0.134357	0.000117945	1.0007
117	0.292918	0.643262	2.3136	761835904	4644687	0.238164	0.00605976	0.0720397	0	0.0915662	2.72689e-07	0.112548	7.96858e-06	0.134419	8.09887e-05	1.00045
118	0.291645	0.638325	2.2765	757219840	4616064	0.24278	0.00605913	0.0720397	0	0.0915663	1.21183e-07	0.112552	4.51405e-06	0.13446	5.41686e-05	0.999846
119	0.290389	0.633455	2.23922	752627377	4592463	0.247373	0.0060649	0.0720397	0	0.0915663	3.03245e-08	0.112554	2.42596e-06	0.134487	3.52674e-05	1.00035
120	0.289149	0.628655	2.20228	748060824	4566553	0.251939	0.00606748	0.0720397	0	0.0915663	0	0.112555	1.24383e-06	0.134504	2.22677e-05	1.00038
