# Supplementary material for: Quantifying the Potential for Future Gene Therapy to Lower Lifetime Risk of Polygenic Late-Onset Diseases
Source: MDPI journal article supplement (doi:10.3390/ijms20133352), 2019-07-08
Supplement: s2 [file s2 › SuppFiles/Results/LODsRareMedium/ColorectalCancer/1.000/IndividualsByBetaDistrib.csv]

nEntry	Beta	nDetrimentalCount	nFractionPopulation	nCumulativeFractionPopulation	nEditsNeeded	nIndividuals
0	-19.8	0	0	1	0	0
1	-19.6	0	0	1	0	0
2	-19.4	0	0	1	0	0
3	-19.2	0	0	1	0	0
4	-19	0	0	1	0	0
5	-18.8	0	0	1	0	0
6	-18.6	0	0	1	0	0
7	-18.4	0	0	1	0	0
8	-18.2	0	0	1	0	0
9	-18	0	0	1	0	0
10	-17.8	0	0	1	0	0
11	-17.6	0	0	1	0	0
12	-17.4	0	0	1	0	0
13	-17.2	0	0	1	0	0
14	-17	0	0	1	0	0
15	-16.8	0	0	1	0	0
16	-16.6	0	0	1	0	0
17	-16.4	0	0	1	0	0
18	-16.2	0	0	1	0	0
19	-16	0	0	1	0	0
20	-15.8	0	0	1	0	0
21	-15.6	0	0	1	0	0
22	-15.4	0	0	1	0	0
23	-15.2	0	0	1	0	0
24	-15	0	0	1	0	0
25	-14.8	0	0	1	0	0
26	-14.6	0	0	1	0	0
27	-14.4	0	0	1	0	0
28	-14.2	0	0	1	0	0
29	-14	0	0	1	0	0
30	-13.8	0	0	1	0	0
31	-13.6	0	0	1	0	0
32	-13.4	0	0	1	0	0
33	-13.2	0	0	1	0	0
34	-13	0	0	1	0	0
35	-12.8	0	0	1	0	0
36	-12.6	0	0	1	0	0
37	-12.4	0	0	1	0	0
38	-12.2	0	0	1	0	0
39	-12	0	0	1	0	0
40	-11.8	0	0	1	0	0
41	-11.6	0	0	1	0	0
42	-11.4	0	0	1	0	0
43	-11.2	0	0	1	0	0
44	-11	0	0	1	0	0
45	-10.8	0	0	1	0	0
46	-10.6	0	0	1	0	0
47	-10.4	0	0	1	0	0
48	-10.2	0	0	1	0	0
49	-10	0	0	1	0	0
50	-9.8	0	0	1	0	0
51	-9.6	0	0	1	0	0
52	-9.4	0	0	1	0	0
53	-9.2	0	0	1	0	0
54	-9	0	0	1	0	0
55	-8.8	0	0	1	0	0
56	-8.6	0	0	1	0	0
57	-8.4	0	0	1	0	0
58	-8.2	0	0	1	0	0
59	-8	0	0	1	0	0
60	-7.8	0	0	1	0	0
61	-7.6	0	0	1	0	0
62	-7.4	0	0	1	0	0
63	-7.2	0	0	1	0	0
64	-7	0	0	1	0	0
65	-6.8	0	0	1	0	0
66	-6.6	0	0	1	0	0
67	-6.4	0	0	1	0	0
68	-6.2	0	0	1	0	0
69	-6	0	0	1	0	0
70	-5.8	0	0	1	0	0
71	-5.6	0	0	1	0	0
72	-5.4	0	0	1	0	0
73	-5.2	0	0	1	0	0
74	-5	0	0	1	0	0
75	-4.8	0	0	1	0	0
76	-4.6	0	0	1	0	0
77	-4.4	0	0	1	0	0
78	-4.2	0	0.000135215	1	0	135215
79	-4	1	0.000248784	0.99986478	0	248784
80	-3.8	1.3066	0.000721312	0.999616	0	721312
81	-3.6	1.7881	0.001771787	0.99889469	0	1771787
82	-3.4	2.2282	0.001795809	0.9971229	0	1795809
83	-3.2	2.6765	0.004101551	0.99532709	0	4101551
84	-3	2.9496	0.005787617	0.99122554	0	5787617
85	-2.8	3.4597	0.008112857	0.98543793	0	8112857
86	-2.6	3.9004	0.013589973	0.97732507	0	13589973
87	-2.4	4.16	0.015929763	0.96373509	0	15929763
88	-2.2	4.6618	0.019803725	0.94780533	0	19803725
89	-2	5.0464	0.0278382	0.92800161	0	27838200
90	-1.8	5.3431	0.030525506	0.90016341	0	30525506
91	-1.6	5.8364	0.035455687	0.8696379	0	35455687
92	-1.4	6.1825	0.043651886	0.83418221	0	43651886
93	-1.2	6.5023	0.045272895	0.79053033	0	45272895
94	-1	6.9738	0.049010753	0.74525743	0	49010753
95	-0.8	7.31	0.054131379	0.69624668	0	54131379
96	-0.6	7.6522	0.053667972	0.6421153	0	53667972
97	-0.4	8.0799	0.055180639	0.58844733	0	55180639
98	-0.2	8.4171	0.056418471	0.53326669	0	56418471
99	0	8.7799	0.053538948	0.47684822	0	53538948
100	0.2	9.1882	0.051749621	0.42330927	0.40828	51749621
101	0.4	9.5252	0.049454082	0.37155965	0.74532	49454082
102	0.6	9.8859	0.045087811	0.32210557	1.106	45087811
103	0.8	10.289	0.041207911	0.27701776	1.5094	41207911
104	1	10.632	0.03768108	0.23580985	1.8522	37681080
105	1.2	10.99	0.033048978	0.19812877	2.2097	33048978
106	1.4	11.372	0.029028932	0.16507979	2.5923	29028932
107	1.6	11.726	0.025079122	0.13605086	2.9461	25079122
108	1.8	12.082	0.021268577	0.11097173	3.3016	21268577
109	2	12.458	0.018056371	0.089703157	3.6786	18056371
110	2.2	12.804	0.014999523	0.071646786	4.0243	14999523
111	2.4	13.168	0.012217022	0.056647263	4.3882	12217022
112	2.6	13.543	0.009921037	0.044430241	4.7629	9921037
113	2.8	13.895	0.007989519	0.034509204	5.115	7989519
114	3	14.25	0.006320212	0.026519685	5.4699	6320212
115	3.2	14.626	0.004949582	0.020199473	5.846	4949582
116	3.4	14.961	0.003833754	0.015249891	6.1813	3833754
117	3.6	15.331	0.002956	0.011416137	6.5512	2956000
118	3.8	15.693	0.002246783	0.008460137	6.9131	2246783
119	4	16.046	0.001691428	0.006213354	7.2661	1691428
120	4.2	16.398	0.001254884	0.004521926	7.6178	1254884
121	4.4	16.763	0.000928881	0.003267042	7.9828	928881
122	4.6	17.117	0.000676562	0.002338161	8.3368	676562
123	4.8	17.473	0.000492626	0.001661599	8.6934	492626
124	5	17.828	0.000353039	0.001168973	9.0484	353039
125	5.2	18.184	0.000251491	0.000815934	9.4044	251491
126	5.4	18.544	0.000176347	0.000564443	9.7641	176347
127	5.6	18.899	0.00012374	0.000388096	10.119	123740
128	5.8	19.242	8.5283e-05	0.000264356	10.462	85283
129	6	19.608	5.8966e-05	0.000179073	10.828	58966
130	6.2	19.95	4.0246e-05	0.000120107	11.17	40246
131	6.4	20.326	2.7143e-05	7.9861e-05	11.546	27143
132	6.6	20.653	1.8046e-05	5.2718e-05	11.874	18046
133	6.8	21.027	1.2064e-05	3.4672e-05	12.248	12064
134	7	21.377	7.919e-06	2.2608e-05	12.597	7919
135	7.2	21.711	5.352e-06	1.4689e-05	12.931	5352
136	7.4	22.091	3.423e-06	9.337e-06	13.311	3423
137	7.6	22.422	2.184e-06	5.914e-06	13.642	2184
138	7.8	22.8	1.39e-06	3.73e-06	14.02	1390
139	8	23.131	8.63e-07	2.34e-06	14.351	863
140	8.2	23.392	5.77e-07	1.477e-06	14.612	577
141	8.4	23.798	3.56e-07	9e-07	15.018	356
142	8.6	24.171	2.16e-07	5.44e-07	15.391	216
143	8.8	24.543	1.4e-07	3.28e-07	15.763	140
144	9	24.694	7.2e-08	1.88e-07	15.915	72
145	9.2	25.184	4.9e-08	1.16e-07	16.404	49
146	9.4	25.069	2.9e-08	6.7e-08	16.289	29
147	9.6	25.389	1.8e-08	3.8e-08	16.609	18
148	9.8	25.75	4e-09	2e-08	16.97	4
149	10	26.25	4e-09	1.6e-08	17.47	4
150	10.2	26.429	7e-09	1.2e-08	17.649	7
151	10.4	28	1e-09	5e-09	19.22	1
152	10.6	27.5	2e-09	4e-09	18.72	2
153	10.8	27	2e-09	2e-09	18.22	2
154	11	0	0	0	0	0
155	11.2	0	0	0	0	0
156	11.4	0	0	0	0	0
157	11.6	0	0	0	0	0
158	11.8	0	0	0	0	0
159	12	0	0	0	0	0
160	12.2	0	0	0	0	0
161	12.4	0	0	0	0	0
162	12.6	0	0	0	0	0
163	12.8	0	0	0	0	0
164	13	0	0	0	0	0
165	13.2	0	0	0	0	0
166	13.4	0	0	0	0	0
167	13.6	0	0	0	0	0
168	13.8	0	0	0	0	0
169	14	0	0	0	0	0
170	14.2	0	0	0	0	0
171	14.4	0	0	0	0	0
172	14.6	0	0	0	0	0
173	14.8	0	0	0	0	0
174	15	0	0	0	0	0
175	15.2	0	0	0	0	0
176	15.4	0	0	0	0	0
177	15.6	0	0	0	0	0
178	15.8	0	0	0	0	0
179	16	0	0	0	0	0
180	16.2	0	0	0	0	0
181	16.4	0	0	0	0	0
182	16.6	0	0	0	0	0
183	16.8	0	0	0	0	0
184	17	0	0	0	0	0
185	17.2	0	0	0	0	0
186	17.4	0	0	0	0	0
187	17.6	0	0	0	0	0
188	17.8	0	0	0	0	0
189	18	0	0	0	0	0
190	18.2	0	0	0	0	0
191	18.4	0	0	0	0	0
192	18.6	0	0	0	0	0
193	18.8	0	0	0	0	0
194	19	0	0	0	0	0
195	19.2	0	0	0	0	0
196	19.4	0	0	0	0	0
197	19.6	0	0	0	0	0
198	19.8	0	0	0	0	0
199	20	0	0	0	0	0
