# Supplementary material for: Quantifying the Potential for Future Gene Therapy to Lower Lifetime Risk of Polygenic Late-Onset Diseases
Source: MDPI journal article supplement (doi:10.3390/ijms20133352), 2019-07-08
Supplement: s2 [file s2 › SuppFiles/Results/LODsRareMedium/ColorectalCancer/EnvironmentArray.csv]

Age	Env	Incidence	CasesExpected
0	0	-1.24456e-05	0
1	0	-1.23286e-05	0
2	0	-1.21963e-05	0
3	0	-1.20468e-05	0
4	0	-1.18777e-05	0
5	0	-1.16864e-05	0
6	0	-1.14702e-05	0
7	0	-1.12258e-05	0
8	0	-1.09493e-05	0
9	0	-1.06368e-05	0
10	0	-1.02834e-05	0
11	0	-9.88381e-06	0
12	0	-9.43204e-06	0
13	0	-8.92126e-06	0
14	0	-8.34377e-06	0
15	0	-7.69089e-06	0
16	0	-6.95278e-06	0
17	0	-6.11834e-06	0
18	0	-5.17503e-06	0
19	0	-4.10869e-06	0
20	0	-2.90334e-06	0
21	0	-1.54089e-06	0
22	0	-9.83483e-10	0
23	5.1045336e-07	1.7394e-06	43
24	1.08546e-06	3.70623e-06	92
25	1.7399621e-06	5.92878e-06	148
26	2.4787541e-06	8.44007e-06	210
27	3.3106988e-06	1.12773e-05	281
28	4.2522412e-06	1.44825e-05	362
29	5.3164707e-06	1.81028e-05	452
30	6.529239e-06	2.21915e-05	554
31	7.903395e-06	2.68083e-05	670
32	9.4284948e-06	3.20205e-05	800
33	1.118842e-05	3.79037e-05	947
34	1.316145e-05	4.45425e-05	1113
35	1.5385524e-05	5.20322e-05	1300
36	1.7928264e-05	6.04792e-05	1511
37	2.0784613e-05	7.00025e-05	1749
38	2.4024386e-05	8.07352e-05	2017
39	2.7667569e-05	9.28257e-05	2319
40	3.1807637e-05	0.000106439	2659
41	3.6477583e-05	0.000121759	3041
42	4.17739e-05	0.000138988	3471
43	4.7765105e-05	0.000158351	3955
44	5.4518702e-05	0.000180095	4497
45	6.2134866e-05	0.000204491	5105
46	7.0768027e-05	0.000231837	5787
47	8.047676e-05	0.000262455	6550
48	9.1465319e-05	0.000296694	7402
49	0.00010382046	0.000334929	8354
50	0.00011777258	0.000377561	9414
51	0.00013339553	0.000425014	10593
52	0.0001509912	0.000477731	11902
53	0.00017074959	0.000536172	13352
54	0.00019281473	0.000600807	14953
55	0.00021756356	0.000672104	16718
56	0.00024504032	0.000750526	18656
57	0.00027577492	0.00083651	20778
58	0.00030976666	0.000930461	23092
59	0.00034755926	0.00103273	25606
60	0.00038917012	0.00114359	28326
61	0.00043489538	0.00126323	31253
62	0.00048514806	0.00139172	34389
63	0.00053991232	0.001529	37729
64	0.00059940156	0.00167488	41265
65	0.00066391323	0.00182897	44986
66	0.00073312207	0.00199073	48875
67	0.00080742117	0.00215944	52912
68	0.0008863284	0.00233421	57070
69	0.00097004492	0.00251398	61322
70	0.0010580612	0.00269756	65635
71	0.0011498785	0.00288366	69974
72	0.0012456258	0.00307089	74302
73	0.0013443403	0.00325786	78584
74	0.0014456189	0.00344316	82783
75	0.0015491692	0.00362543	86865
76	0.0016541102	0.00380343	90800
77	0.0017612531	0.00397599	94559
78	0.0018680846	0.00414215	98119
79	0.0019748377	0.00430105	101461
80	0.0020814534	0.00445206	104571
81	0.0021871966	0.00459469	107441
82	0.0022919285	0.00472863	110065
83	0.0023943735	0.00485374	112443
84	0.0024961291	0.00497001	114577
85	0.0025957014	0.00507756	116475
86	0.0026930279	0.00517661	118145
87	0.0027877783	0.00526748	119596
88	0.0028808612	0.00535052	120842
89	0.0029715189	0.00542617	121895
90	0.0030598499	0.00549486	122768
91	0.0031458822	0.00555708	123476
92	0.0032302917	0.00561328	124031
93	0.0033122391	0.00566393	124447
94	0.003392881	0.00570949	124738
95	0.0034713104	0.00575039	124914
96	0.003547609	0.00578706	124988
97	0.0036233059	0.00581987	124970
98	0.0036970173	0.0058492	124869
99	0.0037692542	0.00587538	124693
100	0.0038401763	0.00589873	124453
101	0.0039113048	0.00591953	124155
102	0.0039800649	0.00593805	123806
103	0.0040486715	0.00595453	123412
104	0.0041162401	0.00596917	122979
105	0.0041829258	0.00598218	122512
106	0.0042495513	0.00599374	122014
107	0.0043150848	0.00600399	121490
108	0.0043794038	0.00601309	120943
109	0.0044431939	0.00602116	120377
110	0.0045072243	0.00602831	119795
111	0.0045703721	0.00603465	119199
112	0.0046330694	0.00604027	118590
113	0.0046961406	0.00604524	117970
114	0.0047578477	0.00604965	117342
115	0.0048202904	0.00605355	116707
116	0.004882335	0.00605701	116067
117	0.0049438856	0.00606007	115423
118	0.0050050658	0.00606278	114775
119	0.0050660254	0.00606517	114125
