# Supplementary material for: Quantifying the Potential for Future Gene Therapy to Lower Lifetime Risk of Polygenic Late-Onset Diseases
Source: MDPI journal article supplement (doi:10.3390/ijms20133352), 2019-07-08
Supplement: s2 [file s2 › SuppFiles/Results/LODsRareMedium/ColorectalCancer/EnvironmentArraySD.csv]

Age	Env	EnvSD	Incidence	CasesExpected
0	0	0	-1.24456e-05	0
1	0	0	-1.23286e-05	0
2	0	0	-1.21963e-05	0
3	0	0	-1.20468e-05	0
4	0	0	-1.18777e-05	0
5	0	0	-1.16864e-05	0
6	0	0	-1.14702e-05	0
7	0	0	-1.12258e-05	0
8	0	0	-1.09493e-05	0
9	0	0	-1.06368e-05	0
10	0	0	-1.02834e-05	0
11	0	0	-9.88381e-06	0
12	0	0	-9.43204e-06	0
13	0	0	-8.92126e-06	0
14	0	0	-8.34377e-06	0
15	0	0	-7.69089e-06	0
16	0	0	-6.95278e-06	0
17	0	0	-6.11834e-06	0
18	0	0	-5.17503e-06	0
19	0	0	-4.10869e-06	0
20	0	0	-2.90334e-06	0
21	0	0	-1.54089e-06	0
22	0	0	-9.83483e-10	0
23	5.1045336e-07	4.606e-09	1.7394e-06	43
24	1.08546e-06	3.71e-09	3.70623e-06	92
25	1.7399621e-06	4.021e-09	5.92878e-06	148
26	2.4787541e-06	1.248e-08	8.44007e-06	210
27	3.3106988e-06	1.278e-08	1.12773e-05	281
28	4.2522412e-06	6.127e-09	1.44825e-05	362
29	5.3164707e-06	1.573e-08	1.81028e-05	452
30	6.529239e-06	1.488e-08	2.21915e-05	554
31	7.903395e-06	2.101e-08	2.68083e-05	670
32	9.4284948e-06	1.178e-08	3.20205e-05	800
33	1.118842e-05	1.3e-08	3.79037e-05	947
34	1.316145e-05	1.611e-08	4.45425e-05	1113
35	1.5385524e-05	1.761e-08	5.20322e-05	1300
36	1.7928264e-05	1.81e-08	6.04792e-05	1511
37	2.0784613e-05	1.83e-08	7.00025e-05	1749
38	2.4024386e-05	1.485e-08	8.07352e-05	2017
39	2.7667569e-05	3.258e-08	9.28257e-05	2319
40	3.1807637e-05	2.716e-08	0.000106439	2659
41	3.6477583e-05	2.239e-08	0.000121759	3041
42	4.17739e-05	3.466e-08	0.000138988	3471
43	4.7765105e-05	2.668e-08	0.000158351	3955
44	5.4518702e-05	4.152e-08	0.000180095	4497
45	6.2134866e-05	4.011e-08	0.000204491	5105
46	7.0768027e-05	3.859e-08	0.000231837	5787
47	8.047676e-05	5.082e-08	0.000262455	6550
48	9.1465319e-05	5.842e-08	0.000296694	7402
49	0.00010382046	6.497e-08	0.000334929	8354
50	0.00011777258	9.736e-08	0.000377561	9414
51	0.00013339553	6.4e-08	0.000425014	10593
52	0.0001509912	1.032e-07	0.000477731	11902
53	0.00017074959	1.097e-07	0.000536172	13352
54	0.00019281473	8.532e-08	0.000600807	14953
55	0.00021756356	8.628e-08	0.000672104	16718
56	0.00024504032	8.459e-08	0.000750526	18656
57	0.00027577492	1.313e-07	0.00083651	20778
58	0.00030976666	1.411e-07	0.000930461	23092
59	0.00034755926	1.321e-07	0.00103273	25606
60	0.00038917012	1.527e-07	0.00114359	28326
61	0.00043489538	8.967e-08	0.00126323	31253
62	0.00048514806	1.763e-07	0.00139172	34389
63	0.00053991232	1.251e-07	0.001529	37729
64	0.00059940156	1.675e-07	0.00167488	41265
65	0.00066391323	1.782e-07	0.00182897	44986
66	0.00073312207	2.142e-07	0.00199073	48875
67	0.00080742117	2.778e-07	0.00215944	52912
68	0.0008863284	2.296e-07	0.00233421	57070
69	0.00097004492	1.579e-07	0.00251398	61322
70	0.0010580612	2.398e-07	0.00269756	65635
71	0.0011498785	2.534e-07	0.00288366	69974
72	0.0012456258	2.067e-07	0.00307089	74302
73	0.0013443403	3.639e-07	0.00325786	78584
74	0.0014456189	2.973e-07	0.00344316	82783
75	0.0015491692	4.109e-07	0.00362543	86865
76	0.0016541102	5.209e-07	0.00380343	90800
77	0.0017612531	2.98e-07	0.00397599	94559
78	0.0018680846	3.239e-07	0.00414215	98119
79	0.0019748377	4.198e-07	0.00430105	101461
80	0.0020814534	3.409e-07	0.00445206	104571
81	0.0021871966	3.909e-07	0.00459469	107441
82	0.0022919285	6.152e-07	0.00472863	110065
83	0.0023943735	3.934e-07	0.00485374	112443
84	0.0024961291	3.974e-07	0.00497001	114577
85	0.0025957014	7.783e-07	0.00507756	116475
86	0.0026930279	8.063e-07	0.00517661	118145
87	0.0027877783	9.611e-07	0.00526748	119596
88	0.0028808612	6.557e-07	0.00535052	120842
89	0.0029715189	1.004e-06	0.00542617	121895
90	0.0030598499	9.586e-07	0.00549486	122768
91	0.0031458822	5.344e-07	0.00555708	123476
92	0.0032302917	7.178e-07	0.00561328	124031
93	0.0033122391	9.125e-07	0.00566393	124447
94	0.003392881	5.825e-07	0.00570949	124738
95	0.0034713104	8.616e-07	0.00575039	124914
96	0.003547609	8.81e-07	0.00578706	124988
97	0.0036233059	6.96e-07	0.00581987	124970
98	0.0036970173	8.223e-07	0.0058492	124869
99	0.0037692542	8.066e-07	0.00587538	124693
100	0.0038401763	7.782e-07	0.00589873	124453
101	0.0039113048	1.109e-06	0.00591953	124155
102	0.0039800649	1.147e-06	0.00593805	123806
103	0.0040486715	6.925e-07	0.00595453	123412
104	0.0041162401	7.356e-07	0.00596917	122979
105	0.0041829258	5.719e-07	0.00598218	122512
106	0.0042495513	1.048e-06	0.00599374	122014
107	0.0043150848	6.448e-07	0.00600399	121490
108	0.0043794038	9.639e-07	0.00601309	120943
109	0.0044431939	6.256e-07	0.00602116	120377
110	0.0045072243	5.668e-07	0.00602831	119795
111	0.0045703721	4.813e-07	0.00603465	119199
112	0.0046330694	6.561e-07	0.00604027	118590
113	0.0046961406	6.269e-07	0.00604524	117970
114	0.0047578477	1.016e-06	0.00604965	117342
115	0.0048202904	8.928e-07	0.00605355	116707
116	0.004882335	9.35e-07	0.00605701	116067
117	0.0049438856	9.393e-07	0.00606007	115423
118	0.0050050658	5.066e-07	0.00606278	114775
119	0.0050660254	8.313e-07	0.00606517	114125
