# Supplementary material for: Quantifying the Potential for Future Gene Therapy to Lower Lifetime Risk of Polygenic Late-Onset Diseases
Source: MDPI journal article supplement (doi:10.3390/ijms20133352), 2019-07-08
Supplement: s2 [file s2 › SuppFiles/Results/LODsRareMedium/ColorectalCancer/FrailtyAnalysis.csv]

Age	Heritability	MeanOR	CaseOR	nControls	nCases	nCumIncidence	nIncidence	nLifeIncidence0	nAbsIncidence0	nLifeIncidence5	nAbsIncidence5	nLifeIncidence10	nAbsIncidence10	nLifeIncidence15	nAbsIncidence15
24	0.38671	0.99992	19.918	9999980	20	2e-06	2e-06	1.9749e-06	1.9749e-06	1.9817e-06	1.9817e-06	1.9847e-06	1.9847e-06	1.9857e-06	1.9857e-06
25	0.3867	0.99991	21.839	9999942	38	5.8e-06	3.8e-06	5.7238e-06	3.749e-06	5.745e-06	3.7633e-06	5.755e-06	3.7703e-06	5.7581e-06	3.7724e-06
26	0.3867	0.99989	17.34	9999878	64	1.22e-05	6.4e-06	1.2032e-05	6.3083e-06	1.2079e-05	6.3344e-06	1.2104e-05	6.3486e-06	1.2111e-05	6.353e-06
27	0.38669	0.99987	15.557	9999800	78	2e-05	7.8001e-06	1.9713e-05	7.6811e-06	1.9794e-05	7.7147e-06	1.9839e-05	7.7351e-06	1.9853e-05	7.7421e-06
28	0.38668	0.99984	10.608	9999691	109	3.09e-05	1.09e-05	3.0436e-05	1.0724e-05	3.0566e-05	1.0773e-05	3.0644e-05	1.0805e-05	3.0671e-05	1.0818e-05
29	0.38667	0.99982	9.6604	9999570	121	4.3e-05	1.21e-05	4.2329e-05	1.1893e-05	4.2514e-05	1.1948e-05	4.2633e-05	1.199e-05	4.2678e-05	1.2008e-05
30	0.38666	0.99977	13.632	9999406	164	5.94e-05	1.6401e-05	5.8431e-05	1.6103e-05	5.8694e-05	1.618e-05	5.8875e-05	1.6242e-05	5.895e-05	1.6273e-05
31	0.38663	0.99971	14.103	9999182	224	8.18e-05	2.2401e-05	8.0401e-05	2.1971e-05	8.0773e-05	2.208e-05	8.1045e-05	2.2171e-05	8.117e-05	2.2221e-05
32	0.38661	0.99965	14.382	9998952	230	0.0001048	2.3002e-05	0.00010293	2.2536e-05	0.00010342	2.2651e-05	0.00010379	2.275e-05	0.00010398	2.281e-05
33	0.38658	0.99957	14.596	9998639	313	0.0001361	3.1303e-05	0.00013357	3.0635e-05	0.00013421	3.0796e-05	0.00013473	3.0937e-05	0.00013501	3.1031e-05
34	0.38655	0.99948	14.181	9998287	352	0.0001713	3.5205e-05	0.00016797	3.4413e-05	0.00016881	3.46e-05	0.00016948	3.4763e-05	0.00016989	3.4883e-05
35	0.38652	0.99937	12.295	9997867	420	0.0002133	4.2007e-05	0.00020898	4.1013e-05	0.00021005	4.1244e-05	0.00021092	4.1443e-05	0.00021148	4.1602e-05
36	0.38646	0.99922	15.06	9997313	554	0.0002687	5.5412e-05	0.000263	5.4032e-05	0.00026438	5.4348e-05	0.00026553	5.4617e-05	0.00026631	5.4843e-05
37	0.38641	0.99905	13.699	9996657	656	0.0003343	6.5618e-05	0.00032688	6.3899e-05	0.00032866	6.4288e-05	0.00033013	6.4617e-05	0.00033119	6.4899e-05
38	0.38634	0.99887	15.393	9995987	670	0.0004013	6.7022e-05	0.00039204	6.5176e-05	0.00039422	6.5591e-05	0.00039604	6.5936e-05	0.00039741	6.6237e-05
39	0.38627	0.99866	13.243	9995180	807	0.000482	8.0732e-05	0.0004704	7.8394e-05	0.00047311	7.8917e-05	0.00047535	7.9346e-05	0.00047709	7.9719e-05
40	0.38619	0.99842	13.844	9994289	891	0.0005711	8.9143e-05	0.00055678	8.6427e-05	0.0005601	8.7033e-05	0.00056284	8.7524e-05	0.000565	8.7945e-05
41	0.38609	0.99814	13.451	9993217	1072	0.0006783	0.00010726	0.00066055	0.00010382	0.00066463	0.00010459	0.00066798	0.0001052	0.00067066	0.00010572
42	0.38599	0.99784	13.788	9992063	1154	0.0007937	0.00011548	0.00077206	0.00011158	0.00077701	0.00011245	0.00078104	0.00011314	0.0007843	0.00011372
43	0.38587	0.9975	12.869	9990719	1344	0.0009281	0.00013451	0.00090169	0.00012973	0.00090771	0.0001308	0.00091257	0.00013163	0.00091652	0.00013233
44	0.38573	0.99708	13.605	9989102	1617	0.0010898	0.00016185	0.0010573	0.0001558	0.0010647	0.00015716	0.0010706	0.00015821	0.0010754	0.00015907
45	0.38557	0.9966	14.659	9987323	1779	0.0012677	0.00017809	0.0012282	0.00017106	0.0012372	0.00017267	0.0012443	0.00017388	0.0012501	0.00017486
46	0.38539	0.99607	12.722	9985253	2070	0.0014747	0.00020726	0.0014266	0.00019861	0.0014376	0.00020062	0.0014462	0.0002021	0.0014531	0.00020328
47	0.3852	0.99549	11.949	9982897	2356	0.0017103	0.00023595	0.0016518	0.00022552	0.0016652	0.00022799	0.0016756	0.00022977	0.001684	0.00023117
48	0.38498	0.99482	12.642	9980263	2634	0.0019737	0.00026385	0.0019028	0.00025149	0.0019193	0.00025448	0.0019317	0.00025658	0.0019417	0.00025822
49	0.38473	0.99407	12.609	9977309	2954	0.0022691	0.00029598	0.0021835	0.00028126	0.0022036	0.00028491	0.0022186	0.00028741	0.0022305	0.00028933
50	0.38445	0.99322	12.447	9973930	3379	0.002607	0.00033867	0.0025035	0.00032073	0.0025282	0.0003253	0.0025462	0.00032835	0.0025604	0.00033065
51	0.38416	0.99232	11.646	9970227	3703	0.0029773	0.00037127	0.0028529	0.0003503	0.002883	0.00035577	0.0029046	0.00035937	0.0029215	0.00036202
52	0.38381	0.99125	11.75	9965911	4316	0.0034089	0.00043289	0.0032585	0.00040678	0.0032956	0.00041377	0.0033217	0.00041829	0.0033418	0.00042155
53	0.38344	0.99009	11.176	9961091	4820	0.0038909	0.00048365	0.0037094	0.00045245	0.003755	0.00046099	0.0037866	0.00046648	0.0038105	0.00047033
54	0.38304	0.98882	11.224	9955821	5270	0.0044179	0.00052906	0.0042	0.00049252	0.0042558	0.00050273	0.0042938	0.00050927	0.0043222	0.00051373
55	0.38259	0.98739	10.932	9949830	5991	0.005017	0.00060176	0.0047548	0.00055722	0.0048231	0.00056989	0.0048693	0.000578	0.0049031	0.00058342
56	0.38208	0.98576	11.045	9943022	6808	0.0056978	0.00068423	0.0053815	0.00062994	0.0054655	0.0006456	0.0055217	0.00065568	0.0055621	0.00066231
57	0.38154	0.984	10.419	9935502	7520	0.0064498	0.00075631	0.0060695	0.00069194	0.0061721	0.00071069	0.0062405	0.0007229	0.0062887	0.00073081
58	0.38094	0.98207	10.373	9927219	8283	0.0072781	0.00083368	0.0068222	0.00075755	0.006947	0.0007799	0.00703	0.00079463	0.0070876	0.00080408
59	0.38029	0.97992	10.349	9917988	9231	0.0082012	0.00092987	0.0076549	0.00083878	0.0078063	0.00086564	0.0079071	0.0008836	0.0079762	0.00089508
60	0.3796	0.97759	9.8366	9907747	10241	0.0092253	0.0010326	0.0085714	0.00092414	0.0087546	0.00095614	0.008877	0.00097788	0.0089598	0.0009918
61	0.37882	0.975	9.7702	9896347	11400	0.010365	0.0011506	0.0095832	0.0010212	0.0098042	0.0010593	0.0099526	0.0010856	0.010052	0.0011026
62	0.37803	0.97229	9.2683	9884154	12193	0.011585	0.0012321	0.010656	0.0010837	0.01092	0.0011272	0.011098	0.0011578	0.011218	0.0011776
63	0.37716	0.9693	9.1793	9870612	13542	0.012939	0.0013701	0.011835	0.0011935	0.01215	0.001245	0.012365	0.0012817	0.012508	0.0013059
64	0.37623	0.96606	8.8228	9855675	14937	0.014432	0.0015133	0.013123	0.0013047	0.013498	0.001365	0.013756	0.0014088	0.013928	0.001438
65	0.37522	0.96251	8.6638	9839127	16548	0.016087	0.001679	0.014534	0.0014316	0.014979	0.0015027	0.015288	0.0015548	0.015495	0.0015901
66	0.37413	0.95867	8.4069	9821022	18105	0.017898	0.0018401	0.016059	0.0015504	0.016585	0.0016331	0.016955	0.0016941	0.017203	0.0017362
67	0.37297	0.95455	8.1592	9801296	19726	0.01987	0.0020085	0.0177	0.0016708	0.018321	0.0017666	0.01876	0.0018376	0.019057	0.0018874
68	0.37172	0.95009	8.0868	9779875	21421	0.022013	0.0021855	0.019458	0.0017931	0.020187	0.0019038	0.020706	0.001986	0.021061	0.0020445
69	0.37043	0.94544	7.6864	9757001	22874	0.0243	0.0023389	0.021307	0.0018904	0.022159	0.0020164	0.022769	0.0021098	0.02319	0.0021773
70	0.36907	0.94048	7.5344	9732302	24699	0.02677	0.0025314	0.023271	0.002013	0.024265	0.0021584	0.02498	0.0022656	0.025477	0.0023441
71	0.36768	0.93534	7.1934	9706171	26131	0.029383	0.002685	0.025312	0.0020976	0.026466	0.0022623	0.027299	0.0023829	0.027883	0.0024719
72	0.36623	0.92994	6.961	9678244	27927	0.032176	0.0028772	0.027452	0.0022045	0.028789	0.0023935	0.029755	0.0025307	0.030438	0.0026324
73	0.36471	0.92423	6.7875	9648380	29864	0.035162	0.0030857	0.029692	0.0023142	0.03124	0.0025317	0.032357	0.002688	0.033152	0.0028039
74	0.36314	0.91835	6.5605	9617022	31358	0.038298	0.0032501	0.031989	0.002381	0.033774	0.0026269	0.03506	0.002802	0.03598	0.0029317
75	0.36152	0.91222	6.4163	9584042	32980	0.041596	0.0034293	0.034344	0.0024488	0.036397	0.002727	0.037872	0.002924	0.038932	0.0030692
76	0.35984	0.90582	6.2027	9548955	35087	0.045104	0.003661	0.03678	0.002542	0.039138	0.0028601	0.040829	0.0030846	0.042046	0.0032491
77	0.35816	0.89936	5.9585	9512792	36163	0.048721	0.0037871	0.039215	0.0025498	0.041909	0.0029016	0.043837	0.0031504	0.045227	0.003331
78	0.35644	0.89274	5.7717	9475164	37628	0.052484	0.0039555	0.041664	0.0025742	0.044731	0.0029665	0.046924	0.0032453	0.048505	0.0034457
79	0.35469	0.88597	5.628	9436154	39010	0.056385	0.0041171	0.044109	0.0025804	0.047588	0.0030162	0.050077	0.0033277	0.051868	0.0035495
80	0.35291	0.8791	5.4546	9395892	40262	0.060411	0.0042668	0.046529	0.0025653	0.050463	0.0030468	0.053279	0.003393	0.055301	0.003638
81	0.3511	0.87208	5.3521	9354352	41540	0.064565	0.0044211	0.048915	0.0025385	0.053348	0.0030697	0.056524	0.0034539	0.058801	0.0037251
82	0.34931	0.86504	5.0504	9311401	42951	0.06886	0.0045916	0.051257	0.0025047	0.05624	0.0030914	0.059815	0.0035179	0.062374	0.0038196
83	0.34744	0.85775	5.0252	9266810	44591	0.073319	0.0047889	0.053555	0.0024671	0.059141	0.0031165	0.063159	0.0035915	0.066032	0.003929
84	0.3456	0.8505	4.8662	9221753	45057	0.077825	0.0048622	0.055733	0.0023502	0.061965	0.0030474	0.06646	0.0035621	0.069674	0.0039299
85	0.34378	0.84329	4.6721	9175863	45890	0.082414	0.0049763	0.057799	0.0022408	0.064724	0.0029919	0.069737	0.0035534	0.073323	0.0039572
86	0.34192	0.836	4.6166	9129250	46613	0.087075	0.00508	0.059739	0.0021142	0.067401	0.0029168	0.072973	0.0035272	0.076965	0.0039686
87	0.34008	0.82873	4.4422	9081738	47512	0.091826	0.0052044	0.06155	0.0019841	0.069993	0.002839	0.076172	0.003504	0.080605	0.0039875
88	0.33825	0.82148	4.332	9033741	47997	0.096626	0.005285	0.063209	0.0018269	0.072465	0.0027227	0.079296	0.0034393	0.084205	0.0039636
89	0.33643	0.8143	4.2229	8985557	48184	0.10144	0.0053338	0.064702	0.0016524	0.074794	0.0025782	0.082316	0.003343	0.087735	0.0039076
90	0.33461	0.80713	4.1251	8936881	48676	0.10631	0.0054171	0.066036	0.0014843	0.076986	0.0024394	0.085242	0.0032569	0.09121	0.0038682
91	0.33283	0.8001	3.979	8888117	48764	0.11119	0.0054565	0.0672	0.0013029	0.079016	0.0022709	0.088042	0.003133	0.094596	0.0037887
92	0.33101	0.79301	3.9082	8838523	49594	0.11615	0.0055798	0.068216	0.0011422	0.080906	0.0021272	0.090748	0.0030438	0.097935	0.0037568
93	0.32925	0.78606	3.804	8789159	49364	0.12108	0.0055851	0.069066	0.00096242	0.082613	0.0019306	0.093291	0.0028773	0.10115	0.0036346
94	0.32752	0.77914	3.7002	8739292	49867	0.12607	0.0056737	0.069775	0.00080686	0.084158	0.0017577	0.095701	0.0027425	0.10427	0.003556
95	0.32581	0.77232	3.5937	8689366	49926	0.13106	0.0057128	0.070349	0.0006562	0.085526	0.0015653	0.097949	0.0025725	0.10728	0.0034347
96	0.32411	0.76558	3.5088	8639301	50065	0.13607	0.0057616	0.070803	0.00052224	0.086721	0.0013758	0.10003	0.0023979	0.11015	0.0033082
97	0.32243	0.75891	3.4576	8589457	49844	0.14105	0.0057694	0.071151	0.00040294	0.087741	0.001181	0.10193	0.0021995	0.11287	0.0031472
98	0.32078	0.75233	3.3531	8539444	50013	0.14606	0.0058226	0.071413	0.00030592	0.088603	0.0010034	0.10366	0.0020127	0.11545	0.0029997
99	0.31913	0.74583	3.2869	8489449	49995	0.15106	0.0058546	0.071606	0.00022596	0.089314	0.00083258	0.10521	0.0018137	0.11786	0.0028299
100	0.31752	0.73944	3.2097	8439720	49729	0.15603	0.0058577	0.071744	0.00016235	0.089885	0.00067285	0.10657	0.0016051	0.1201	0.0026378
101	0.31594	0.73314	3.133	8389995	49725	0.161	0.0058918	0.071841	0.00011471	0.090336	0.00053403	0.10776	0.0014069	0.12217	0.0024521
102	0.31434	0.72687	3.1026	8340274	49721	0.16597	0.0059262	0.071908	7.9204e-05	0.090683	0.00041389	0.10878	0.0012131	0.12407	0.0022593
103	0.3128	0.72073	3.0172	8290916	49358	0.17091	0.005918	0.071952	5.2907e-05	0.090943	0.00031093	0.10963	0.0010198	0.12577	0.0020457
104	0.31125	0.71464	2.9716	8241497	49419	0.17585	0.0059606	0.07198	3.4661e-05	0.091133	0.00023005	0.11033	0.00084766	0.1273	0.0018466
105	0.30973	0.70862	2.9089	8192195	49302	0.18078	0.0059822	0.071998	2.1955e-05	0.09127	0.0001658	0.1109	0.00068714	0.12865	0.0016391
106	0.30825	0.70276	2.8069	8143032	49163	0.1857	0.0060012	0.072009	1.3443e-05	0.091366	0.00011684	0.11134	0.00054395	0.12983	0.001433
107	0.30676	0.69694	2.7845	8094141	48891	0.19059	0.006004	0.072016	7.8953e-06	0.091431	8.0244e-05	0.11169	0.00041932	0.13083	0.001229
108	0.30531	0.69123	2.7449	8045850	48291	0.19542	0.0059662	0.07202	4.4448e-06	0.091474	5.3338e-05	0.11194	0.00031346	0.13166	0.0010281
109	0.30386	0.68555	2.6749	7997123	48727	0.20029	0.0060562	0.072021	2.4225e-06	0.091503	3.5217e-05	0.11213	0.00023374	0.13235	0.00086125
110	0.30245	0.68002	2.6331	7949238	47885	0.20508	0.0059878	0.072022	1.2275e-06	0.09152	2.1975e-05	0.11226	0.00016595	0.1329	0.00068779
111	0.30105	0.67456	2.5777	7901449	47789	0.20986	0.0060118	0.072023	6.0118e-07	0.091531	1.3466e-05	0.11235	0.00011705	0.13334	0.00054491
112	0.29969	0.66919	2.5245	7853891	47558	0.21461	0.0060189	0.072023	2.7085e-07	0.091537	7.9148e-06	0.11242	8.0443e-05	0.13367	0.00042036
113	0.29837	0.66395	2.458	7806701	47190	0.21933	0.0060085	0.072023	1.2017e-07	0.091541	4.4763e-06	0.11246	5.3716e-05	0.13392	0.00031569
114	0.29702	0.6587	2.4449	7759488	47213	0.22405	0.0060478	0.072023	3.0239e-08	0.091543	2.4191e-06	0.11249	3.5168e-05	0.1341	0.00023341
115	0.29571	0.65355	2.3986	7712655	46833	0.22873	0.0060356	0.072023	0	0.091544	1.2373e-06	0.1125	2.2151e-05	0.13423	0.00016728
116	0.29442	0.6485	2.3362	7665910	46745	0.23341	0.0060608	0.072023	0	0.091544	6.0608e-07	0.11251	1.3576e-05	0.13432	0.000118
117	0.29311	0.64344	2.3276	7619212	46698	0.23808	0.0060916	0.072023	0	0.091544	2.7412e-07	0.11252	8.0105e-06	0.13438	8.1415e-05
118	0.29182	0.63848	2.3045	7573269	45943	0.24267	0.0060299	0.072023	0	0.091544	1.206e-07	0.11252	4.4923e-06	0.13442	5.3907e-05
119	0.29058	0.63364	2.2292	7527501	45768	0.24725	0.0060434	0.072023	0	0.091544	3.0217e-08	0.11253	2.4173e-06	0.13445	3.5142e-05
120	0.28931	0.62881	2.2069	7481603	45898	0.25184	0.0060974	0.072023	0	0.091544	0	0.11253	1.25e-06	0.13447	2.2377e-05
