# Supplementary material for: Quantifying the Potential for Future Gene Therapy to Lower Lifetime Risk of Polygenic Late-Onset Diseases
Source: MDPI journal article supplement (doi:10.3390/ijms20133352), 2019-07-08
Supplement: s2 [file s2 › SuppFiles/Results/LODsRareMedium/LungCancer/-1.000/FrailtyAnalysis.csv]

Age	Heritability	MeanOR	CaseOR	nControls	nCases	nCumIncidence	nIncidence	nLifeIncidence0	nAbsIncidence0	nLifeIncidence5	nAbsIncidence5	nLifeIncidence10	nAbsIncidence10	nLifeIncidence15	nAbsIncidence15	nIncActDivExp
27	0.0672469	0.476621	0.591749	999999217	783	7.83e-07	7.83e-07	7.71055e-07	7.71055e-07	7.74426e-07	7.74426e-07	7.76478e-07	7.76478e-07	7.77174e-07	7.77174e-07	0.904129
28	0.0672469	0.476621	0.614311	999997529	1688	2.471e-06	1.688e-06	2.4317e-06	1.66065e-06	2.44265e-06	1.66823e-06	2.4498e-06	1.67332e-06	2.45246e-06	1.67529e-06	0.896988
29	0.0672468	0.476621	0.596756	999994919	2610	5.081e-06	2.61001e-06	4.99689e-06	2.56519e-06	5.01988e-06	2.57724e-06	5.03596e-06	2.58616e-06	5.04251e-06	2.59005e-06	0.849304
30	0.0672468	0.47662	0.598484	999991145	3774	8.855e-06	3.77402e-06	8.70233e-06	3.70546e-06	8.74318e-06	3.72332e-06	8.77352e-06	3.73758e-06	8.78704e-06	3.74454e-06	0.844298
31	0.0672468	0.47662	0.600797	999985975	5170	1.4025e-05	5.17005e-06	1.37731e-05	5.07081e-06	1.38391e-05	5.09593e-06	1.38905e-05	5.117e-06	1.39155e-05	5.1285e-06	0.846449
32	0.0672467	0.476619	0.602495	999979230	6745	2.077e-05	6.74509e-06	2.03814e-05	6.60844e-06	2.04812e-05	6.6422e-06	2.05616e-05	6.67124e-06	2.06043e-05	6.68891e-06	0.840166
33	0.0672467	0.476618	0.59574	999970563	8667	2.9437e-05	8.66718e-06	2.88634e-05	8.48209e-06	2.90077e-05	8.52673e-06	2.91271e-05	8.56564e-06	2.91959e-05	8.59182e-06	0.843146
34	0.0672466	0.476617	0.602231	999959492	11071	4.0508e-05	1.10713e-05	3.96854e-05	1.08223e-05	3.98886e-05	1.08812e-05	4.00591e-05	1.09323e-05	4.01658e-05	1.09702e-05	0.857013
35	0.0672464	0.476615	0.599605	999945779	13713	5.4221e-05	1.37136e-05	5.30737e-05	1.33889e-05	5.33525e-05	1.34644e-05	5.35879e-05	1.35293e-05	5.37464e-05	1.35812e-05	0.856486
36	0.0672463	0.476613	0.602055	999929214	16565	7.0786e-05	1.65659e-05	6.92262e-05	1.61533e-05	6.95996e-05	1.62479e-05	6.99154e-05	1.63284e-05	7.01415e-05	1.63959e-05	0.843657
37	0.0672461	0.476611	0.602621	999909035	20179	9.0965e-05	2.01804e-05	8.88767e-05	1.96519e-05	8.93697e-05	1.97716e-05	8.97866e-05	1.98726e-05	9.00995e-05	1.99595e-05	0.844996
38	0.0672459	0.476608	0.600742	999884748	24287	0.000115252	2.42892e-05	0.000112495	2.36202e-05	0.000113138	2.37705e-05	0.00011368	2.38956e-05	0.000114102	2.40047e-05	0.841726
39	0.0672457	0.476605	0.601649	999855101	29647	0.000144899	2.96504e-05	0.000141283	2.87914e-05	0.000142118	2.89836e-05	0.000142818	2.91413e-05	0.000143377	2.92782e-05	0.854935
40	0.0672453	0.476601	0.599055	999819320	35781	0.00018068	3.57862e-05	0.000175974	3.46958e-05	0.000177052	3.49389e-05	0.000177949	3.51361e-05	0.000178677	3.53054e-05	0.862296
41	0.067245	0.476597	0.599526	999777050	42270	0.00022295	4.22776e-05	0.000216889	4.09229e-05	0.000218269	4.12247e-05	0.000219408	4.14661e-05	0.000220341	4.16716e-05	0.854405
42	0.0672445	0.476591	0.602676	999726755	50295	0.000273245	5.03062e-05	0.000265488	4.86101e-05	0.000267247	4.89887e-05	0.000268684	4.9287e-05	0.000269869	4.95388e-05	0.855282
43	0.067244	0.476585	0.600793	999667738	59017	0.000332262	5.90331e-05	0.00032241	5.69375e-05	0.000324639	5.74071e-05	0.00032644	5.77725e-05	0.000327929	5.80765e-05	0.846537
44	0.0672434	0.476577	0.600924	999597176	70562	0.000402824	7.05855e-05	0.000390333	6.79449e-05	0.000393156	6.85406e-05	0.000395415	6.8998e-05	0.00039728	6.93735e-05	0.855663
45	0.0672427	0.476567	0.601691	999513853	83323	0.000486147	8.33566e-05	0.000470366	8.00657e-05	0.000473941	8.08167e-05	0.000476766	8.13831e-05	0.000479089	8.18424e-05	0.855901
46	0.0672418	0.476557	0.600458	999416138	97715	0.000583862	9.77625e-05	0.000564003	9.36829e-05	0.000568524	9.46297e-05	0.000572047	9.53278e-05	0.000574929	9.5886e-05	0.851767
47	0.0672408	0.476544	0.601843	999300235	115903	0.000699765	0.000115971	0.000674786	0.000110848	0.00068052	0.000112061	0.000684915	0.000112933	0.000688484	0.000113621	0.85875
48	0.0672396	0.476529	0.601547	999164753	135482	0.000835247	0.000135577	0.000803922	0.000129226	0.000811192	0.000130764	0.000816665	0.000131842	0.000821072	0.000132682	0.854544
49	0.0672382	0.476511	0.600822	999006305	158448	0.000993695	0.00015858	0.000954486	0.000150689	0.000963713	0.000152648	0.000970523	0.000153986	0.000975957	0.000155014	0.852048
50	0.0672366	0.476491	0.601078	998820071	186234	0.00117993	0.000186419	0.00113086	0.000176546	0.00114259	0.000179059	0.00115108	0.000180739	0.00115778	0.000182006	0.855063
51	0.0672347	0.476467	0.600397	998603054	217017	0.00139695	0.000217273	0.00133562	0.000205005	0.00135055	0.000208207	0.00136114	0.000210311	0.00136939	0.000211862	0.852002
52	0.0672325	0.476439	0.599972	998348935	254119	0.00165106	0.000254474	0.00157441	0.000239126	0.00159345	0.000243233	0.0016067	0.000245895	0.00161686	0.00024781	0.854401
53	0.0672299	0.476406	0.600671	998051992	296943	0.00194801	0.000297434	0.0018522	0.000278247	0.00187648	0.000283502	0.0018931	0.000286875	0.00190562	0.000289241	0.856416
54	0.0672268	0.476368	0.600408	997707447	344545	0.00229255	0.000345217	0.00217295	0.000321373	0.00220388	0.000328039	0.00222475	0.000332303	0.00224018	0.000335217	0.853902
55	0.0672232	0.476323	0.601744	997306834	400613	0.00269317	0.000401534	0.00254391	0.000371814	0.00258328	0.000380268	0.00260955	0.000385681	0.00262859	0.000389299	0.854809
56	0.0672191	0.476271	0.601359	996843341	463493	0.00315666	0.000464745	0.00297062	0.000427865	0.0030206	0.000438503	0.0030537	0.000445351	0.00307723	0.000449852	0.853265
57	0.0672143	0.476212	0.601087	996306276	537065	0.00369372	0.000538766	0.00346198	0.000492911	0.00352527	0.00050627	0.00356704	0.000514966	0.00359619	0.000520601	0.855023
58	0.0672089	0.476143	0.599875	995685603	620673	0.0043144	0.000622974	0.00402598	0.00056609	0.00410591	0.000582786	0.00415864	0.000593794	0.00419483	0.000600859	0.856742
59	0.0672025	0.476064	0.600919	994972017	713586	0.00502798	0.000716678	0.00466966	0.000646476	0.00477021	0.000667177	0.00483672	0.000681016	0.00488172	0.000689867	0.856494
60	0.0671952	0.475973	0.600357	994155228	816789	0.00584477	0.000820917	0.00540068	0.000734712	0.00552654	0.000760156	0.00561025	0.000777441	0.00566626	0.000788507	0.855207
61	0.0671868	0.475869	0.600392	993219647	935581	0.00678035	0.000941081	0.00623101	0.000835214	0.00638788	0.000866402	0.00649301	0.000887943	0.0065628	0.00090181	0.857572
62	0.0671773	0.47575	0.600351	992155317	1064330	0.00784468	0.0010716	0.00716716	0.000942538	0.00736162	0.000980392	0.00749314	0.00100696	0.00758011	0.00102426	0.857434
63	0.0671665	0.475616	0.600027	990947292	1208025	0.00905271	0.00121758	0.00821948	0.00106064	0.00845934	0.0011064	0.00862324	0.00113903	0.00873155	0.00116055	0.859031
64	0.0671542	0.475464	0.599857	989583425	1363867	0.0104166	0.00137633	0.00939533	0.00118659	0.00968961	0.00124151	0.0098929	0.00128126	0.0100276	0.00130784	0.860118
65	0.0671403	0.475293	0.599642	988051791	1531634	0.0119482	0.00154776	0.0107013	0.00131967	0.0110604	0.00138523	0.0113112	0.0014332	0.0114781	0.00146579	0.861006
66	0.0671247	0.475101	0.599415	986339539	1712252	0.0136605	0.00173296	0.0121439	0.00146014	0.01258	0.00153801	0.0128875	0.00159544	0.0130936	0.00163511	0.862692
67	0.0671073	0.474888	0.599194	984439690	1899849	0.0155603	0.00192616	0.0137244	0.00160231	0.0142511	0.00169418	0.0146257	0.00176223	0.0148789	0.00180998	0.862908
68	0.0670879	0.474653	0.599086	982343700	2095990	0.0176563	0.00212912	0.015444	0.00174685	0.0160769	0.0018547	0.0165303	0.00193471	0.0168397	0.00199177	0.863451
69	0.0670666	0.474395	0.598622	980045957	2297743	0.019954	0.00233904	0.0173012	0.00189055	0.0180579	0.00201658	0.018603	0.00210992	0.0189787	0.00217748	0.863976
70	0.0670431	0.474113	0.598201	977540022	2505935	0.02246	0.00255696	0.0192939	0.00203332	0.0201945	0.00218015	0.0208458	0.00228845	0.0212992	0.0023677	0.865653
71	0.0670172	0.473805	0.598378	974822342	2717680	0.0251777	0.00278012	0.0214171	0.0021719	0.0224844	0.00234245	0.0232577	0.00246737	0.0238012	0.0025595	0.868179
72	0.0669896	0.473475	0.597193	971892014	2930328	0.028108	0.00300601	0.0236622	0.00230313	0.024922	0.0025006	0.0258351	0.00264398	0.0264821	0.00275017	0.871428
73	0.0669595	0.473121	0.596928	968763886	3128128	0.0312361	0.0032186	0.0260082	0.00241387	0.0274885	0.00264071	0.0285601	0.00280375	0.0293246	0.00292471	0.871649
74	0.0669274	0.472743	0.596524	965438275	3325611	0.0345617	0.00343284	0.0284446	0.00251492	0.0301765	0.00277463	0.0314272	0.00295959	0.0323245	0.00309658	0.873851
75	0.066893	0.472344	0.596062	961927340	3510935	0.0380727	0.00363662	0.0309516	0.00259679	0.0329684	0.00289188	0.0344208	0.00310071	0.0354667	0.00325474	0.875326
76	0.0668565	0.471922	0.595546	958238606	3688734	0.0417614	0.00383473	0.0335129	0.00266261	0.0358501	0.00299579	0.0375288	0.00323103	0.0387405	0.00340334	0.877714
77	0.0668177	0.471481	0.5949	954387255	3851351	0.0456127	0.0040192	0.0361059	0.00270607	0.0388009	0.00307941	0.0407326	0.00334343	0.042128	0.00353515	0.879471
78	0.0667772	0.471023	0.594245	950388660	3998595	0.0496113	0.0041897	0.0387081	0.00272655	0.0417998	0.00314217	0.0440132	0.00343746	0.0456112	0.00364969	0.880826
79	0.0667346	0.470545	0.593885	946250384	4138276	0.0537496	0.0043543	0.0413018	0.0027291	0.0448315	0.00318998	0.0473581	0.00351941	0.049179	0.00375401	0.883581
80	0.06669	0.470053	0.593209	941989268	4261116	0.0580107	0.00450316	0.0438637	0.00270743	0.0478742	0.00321555	0.0507465	0.00358096	0.0528122	0.00383955	0.885712
81	0.0666439	0.469546	0.59241	937616492	4372776	0.0623835	0.00464207	0.0463745	0.00266536	0.0509104	0.00322317	0.0541627	0.0036265	0.0564965	0.00391127	0.888363
82	0.0665963	0.469026	0.591803	933148561	4467931	0.0668514	0.0047652	0.0488117	0.00259939	0.0539186	0.00320834	0.0575859	0.00365098	0.0602133	0.003964	0.890342
83	0.0665468	0.468493	0.591406	928597488	4551073	0.0714025	0.00487712	0.0511563	0.00251257	0.0568803	0.0031739	0.0609991	0.00365771	0.0639472	0.00400145	0.89242
84	0.0664957	0.46795	0.590628	923973069	4624419	0.0760269	0.00498	0.0533916	0.00240718	0.0597787	0.00312127	0.0643869	0.00364838	0.0676849	0.00402514	0.894856
85	0.0664431	0.467398	0.590033	919286435	4686634	0.0807136	0.00507226	0.055502	0.00228407	0.0625965	0.0030496	0.0677335	0.00362193	0.0714118	0.00403351	0.897203
86	0.0663895	0.466837	0.58919	914550232	4736203	0.0854498	0.00515204	0.0574732	0.00214423	0.0653159	0.00295817	0.071022	0.00357727	0.0751118	0.0040249	0.898994
87	0.0663348	0.46627	0.58845	909770751	4779481	0.0902292	0.00522605	0.0592953	0.00199235	0.0679231	0.00285078	0.07424	0.00351862	0.0787738	0.00400407	0.901253
88	0.0662785	0.465695	0.587765	904953458	4817293	0.0950465	0.00529506	0.0609605	0.00183034	0.0704048	0.00272788	0.077375	0.00344589	0.0823866	0.00397116	0.903954
89	0.0662213	0.465117	0.586844	900115948	4837510	0.0998841	0.00534559	0.0624591	0.00165604	0.0727431	0.0025839	0.0804069	0.0033504	0.0859306	0.00391621	0.904662
90	0.0661627	0.464532	0.586306	895249474	4866474	0.104751	0.0054065	0.0637925	0.00148141	0.0749345	0.00243457	0.0833328	0.00325055	0.0894056	0.00386059	0.908143
91	0.0661034	0.463942	0.585643	890365690	4883784	0.109634	0.00545522	0.0649587	0.00130263	0.0769671	0.00227041	0.0861369	0.00313225	0.0927966	0.00378778	0.910456
92	0.0660426	0.463349	0.584832	885471953	4893737	0.114528	0.00549632	0.0659604	0.00112507	0.0788328	0.00209539	0.0888064	0.00299822	0.0960915	0.00370059	0.912272
93	0.0659811	0.462752	0.584103	880571819	4900134	0.119428	0.00553392	0.0668048	0.000953606	0.0805266	0.00191291	0.0913309	0.00285094	0.0992803	0.00360134	0.914185
94	0.0659186	0.462153	0.583316	875670239	4901580	0.12433	0.00556636	0.0675019	0.000791592	0.0820451	0.00172443	0.0937001	0.00269061	0.102352	0.00348877	0.915833
95	0.0658554	0.461551	0.58239	870768307	4901932	0.129232	0.00559792	0.0680649	0.000643005	0.0833882	0.00153386	0.0959075	0.00252077	0.1053	0.00336564	0.917844
96	0.0657912	0.460947	0.58177	865867780	4900527	0.134132	0.00562782	0.0685091	0.000510106	0.0845584	0.00134384	0.0979471	0.00234224	0.108113	0.00323135	0.92002
97	0.0657261	0.460341	0.580884	860973477	4894303	0.139027	0.00565248	0.0688509	0.000394769	0.0855602	0.00115704	0.0998129	0.00215492	0.110783	0.0030834	0.921718
98	0.0656601	0.459734	0.580011	856085251	4888226	0.143915	0.00567756	0.0691078	0.000298299	0.0864026	0.000978357	0.101503	0.00196256	0.113302	0.00292494	0.923808
99	0.0655934	0.459126	0.579389	851208096	4877155	0.148792	0.00569704	0.069296	0.000219877	0.0870962	0.000810177	0.103014	0.00176492	0.115659	0.00275378	0.925269
100	0.0655257	0.458514	0.578589	846333708	4874388	0.153666	0.00572644	0.0694311	0.000158708	0.0876561	0.000657767	0.104349	0.00156907	0.117854	0.00257864	0.928578
101	0.0654574	0.457904	0.577445	841474680	4859028	0.158525	0.00574127	0.0695257	0.000111782	0.0880965	0.000520388	0.105509	0.00137093	0.119876	0.00238946	0.929732
102	0.065388	0.457292	0.57683	836628125	4846555	0.163372	0.0057596	0.0695905	7.6977e-05	0.088435	0.00040225	0.106502	0.00117896	0.121724	0.00219576	0.931629
103	0.0653178	0.456678	0.576278	831795419	4832706	0.168205	0.00577641	0.0696337	5.16411e-05	0.0886889	0.000303493	0.107334	0.000995391	0.123394	0.00199673	0.933434
104	0.065247	0.456065	0.575196	826979735	4815684	0.17302	0.00578951	0.0696617	3.3666e-05	0.0888747	0.000223446	0.108019	0.000823326	0.124886	0.00179356	0.934768
105	0.0651753	0.455451	0.574397	822177077	4802658	0.177823	0.00580747	0.0696793	2.13134e-05	0.0890078	0.000160954	0.108571	0.000667075	0.126202	0.00159128	0.937
106	0.0651029	0.454835	0.573742	817389861	4787216	0.18261	0.00582261	0.06969	1.30426e-05	0.089101	0.000113366	0.109005	0.000527761	0.127345	0.00139035	0.938871
107	0.0650298	0.454221	0.572564	812620875	4768986	0.187379	0.00583441	0.0696963	7.67225e-06	0.0891648	7.79769e-05	0.109338	0.000407475	0.128322	0.00119427	0.940286
108	0.0649561	0.453607	0.571789	807868967	4751908	0.192131	0.00584763	0.0696999	4.35649e-06	0.0892073	5.22778e-05	0.109587	0.000307235	0.12914	0.00100766	0.942
109	0.0648814	0.452991	0.571145	803134085	4734882	0.196866	0.00586095	0.0697017	2.34438e-06	0.0892348	3.40814e-05	0.10977	0.000226203	0.129814	0.000833486	0.94379
110	0.064806	0.452375	0.570389	798420024	4714061	0.20158	0.00586958	0.0697027	1.20326e-06	0.0892521	2.15414e-05	0.109901	0.000162675	0.130355	0.000674209	0.944875
111	0.0647302	0.45176	0.569333	793726890	4693134	0.206273	0.00587803	0.0697032	5.87803e-07	0.0892626	1.31668e-05	0.109992	0.000114445	0.130781	0.000532784	0.945975
112	0.0646535	0.451145	0.568569	789052456	4674434	0.210948	0.00588922	0.0697034	2.65015e-07	0.0892688	7.74433e-06	0.110055	7.87095e-05	0.131107	0.000411303	0.947555
113	0.064576	0.450529	0.567982	784395388	4657068	0.215605	0.0059021	0.0697035	1.18042e-07	0.0892722	4.39707e-06	0.110096	5.27648e-05	0.131352	0.000310096	0.949438
114	0.0644977	0.449912	0.567144	779757354	4638034	0.220243	0.00591288	0.0697035	2.95644e-08	0.0892741	2.36515e-06	0.110123	3.43834e-05	0.131531	0.000228208	0.951009
115	0.0644183	0.449296	0.5664	775140464	4616890	0.22486	0.00592093	0.0697035	0	0.089275	1.21379e-06	0.11014	2.17298e-05	0.131659	0.000164099	0.952167
116	0.0643384	0.448679	0.565483	770540673	4599791	0.229459	0.00593414	0.0697035	0	0.0892755	5.93414e-07	0.110151	1.32925e-05	0.131748	0.000115538	0.954173
117	0.0642579	0.448063	0.564716	765965609	4575064	0.234034	0.00593747	0.0697035	0	0.0892757	2.67186e-07	0.110157	7.80778e-06	0.131809	7.93543e-05	0.954608
118	0.0641767	0.447449	0.56354	761409017	4556592	0.238591	0.00594882	0.0697035	0	0.0892758	1.18976e-07	0.11016	4.43187e-06	0.13185	5.31825e-05	0.956347
119	0.0640945	0.446833	0.562865	756867227	4541790	0.243133	0.00596498	0.0697035	0	0.0892758	2.98249e-08	0.110162	2.38599e-06	0.131877	3.46864e-05	0.958871
120	0.064012	0.446218	0.562004	752347694	4519533	0.247652	0.00597137	0.0697035	0	0.0892758	0	0.110163	1.22413e-06	0.131893	2.19149e-05	0.959835
