# Supplementary material for: Quantifying the Potential for Future Gene Therapy to Lower Lifetime Risk of Polygenic Late-Onset Diseases
Source: MDPI journal article supplement (doi:10.3390/ijms20133352), 2019-07-08
Supplement: s2 [file s2 › SuppFiles/Results/LODsRareMedium/LungCancer/-1.000/IndividualsByBetaDistrib.csv]

nEntry	Beta	nDetrimentalCount	nFractionPopulation	nCumulativeFractionPopulation	nEditsNeeded	nIndividuals
0	-19.8	0	0	1	0	0
1	-19.6	0	0	1	0	0
2	-19.4	0	0	1	0	0
3	-19.2	0	0	1	0	0
4	-19	0	0	1	0	0
5	-18.8	0	0	1	0	0
6	-18.6	0	0	1	0	0
7	-18.4	0	0	1	0	0
8	-18.2	0	0	1	0	0
9	-18	0	0	1	0	0
10	-17.8	0	0	1	0	0
11	-17.6	0	0	1	0	0
12	-17.4	0	0	1	0	0
13	-17.2	0	0	1	0	0
14	-17	0	0	1	0	0
15	-16.8	0	0	1	0	0
16	-16.6	0	0	1	0	0
17	-16.4	0	0	1	0	0
18	-16.2	0	0	1	0	0
19	-16	0	0	1	0	0
20	-15.8	0	0	1	0	0
21	-15.6	0	0	1	0	0
22	-15.4	0	0	1	0	0
23	-15.2	0	0	1	0	0
24	-15	0	0	1	0	0
25	-14.8	0	0	1	0	0
26	-14.6	0	0	1	0	0
27	-14.4	0	0	1	0	0
28	-14.2	0	0	1	0	0
29	-14	0	0	1	0	0
30	-13.8	0	0	1	0	0
31	-13.6	0	0	1	0	0
32	-13.4	0	0	1	0	0
33	-13.2	0	0	1	0	0
34	-13	0	0	1	0	0
35	-12.8	0	0	1	0	0
36	-12.6	0	0	1	0	0
37	-12.4	0	0	1	0	0
38	-12.2	0	0	1	0	0
39	-12	0	0	1	0	0
40	-11.8	0	0	1	0	0
41	-11.6	0	0	1	0	0
42	-11.4	0	0	1	0	0
43	-11.2	0	0	1	0	0
44	-11	0	0	1	0	0
45	-10.8	0	0	1	0	0
46	-10.6	0	0	1	0	0
47	-10.4	0	0	1	0	0
48	-10.2	0	0	1	0	0
49	-10	0	0	1	0	0
50	-9.8	0	0	1	0	0
51	-9.6	0	0	1	0	0
52	-9.4	0	0	1	0	0
53	-9.2	0	0	1	0	0
54	-9	0	0	1	0	0
55	-8.8	0	0	1	0	0
56	-8.6	0	0	1	0	0
57	-8.4	0	0	1	0	0
58	-8.2	0	0	1	0	0
59	-8	0	0	1	0	0
60	-7.8	0	0	1	0	0
61	-7.6	0	0	1	0	0
62	-7.4	0	0	1	0	0
63	-7.2	0	0	1	0	0
64	-7	0	0	1	0	0
65	-6.8	0	0	1	0	0
66	-6.6	0	0	1	0	0
67	-6.4	0	0	1	0	0
68	-6.2	0	0	1	0	0
69	-6	0	0	1	0	0
70	-5.8	0	0	1	0	0
71	-5.6	0	0	1	0	0
72	-5.4	0	0	1	0	0
73	-5.2	0	0	1	0	0
74	-5	0	0	1	0	0
75	-4.8	0	0	1	0	0
76	-4.6	0	0	1	0	0
77	-4.4	0	0	1	0	0
78	-4.2	0	0	1	0	0
79	-4	0	0	1	0	0
80	-3.8	0	0	1	0	0
81	-3.6	0	0	1	0	0
82	-3.4	0	0	1	0	0
83	-3.2	0	0	1	0	0
84	-3	0	0	1	0	0
85	-2.8	0	0	1	0	0
86	-2.6	0	0	1	0	0
87	-2.4	0	0	1	0	0
88	-2.2	0	0	1	0	0
89	-2	0	0	1	0	0
90	-1.8	0	0	1	0	0
91	-1.6	0	0	1	0	0
92	-1.4	0	0.22774652	1	0	227746515
93	-1.2	1	0.13739025	0.77225349	0	137390253
94	-1	1.1161	0.077717074	0.63486323	0	77717074
95	-0.8	1.2748	0.18851772	0.55714616	0	188517716
96	-0.6	2.0325	0.085631835	0.36862844	0	85631835
97	-0.4	2.2357	0.065741025	0.28299661	0	65741025
98	-0.2	2.425	0.084599981	0.21725558	0	84599981
99	0	2.8718	0.045950683	0.1326556	0	45950683
100	0.2	3.2891	0.027478711	0.086704918	0.41736	27478711
101	0.4	3.5356	0.02470527	0.059226207	0.66387	24705270
102	0.6	3.8739	0.01442771	0.034520937	1.0021	14427710
103	0.8	4.3304	0.007644995	0.020093227	1.4586	7644995
104	1	4.6174	0.005581802	0.012448232	1.7456	5581802
105	1.2	4.8943	0.00321964	0.00686643	2.0225	3219640
106	1.4	5.3644	0.001566979	0.00364679	2.4927	1566979
107	1.6	5.6758	0.000995087	0.002079811	2.8041	995087
108	1.8	5.9334	0.000549422	0.001084724	3.0616	549422
109	2	6.3743	0.000252515	0.000535302	3.5025	252515
110	2.2	6.7163	0.000142219	0.000282787	3.8445	142219
111	2.4	6.9838	7.4169e-05	0.000140568	4.112	74169
112	2.6	7.388	3.4013e-05	6.6399e-05	4.5162	34013
113	2.8	7.745	1.7194e-05	3.2386e-05	4.8732	17194
114	3	8.0228	8.339e-06	1.5192e-05	5.151	8339
115	3.2	8.409	3.709e-06	6.853e-06	5.5372	3709
116	3.4	8.7936	1.754e-06	3.144e-06	5.9218	1754
117	3.6	9.0245	7.75e-07	1.39e-06	6.1528	775
118	3.8	9.3695	3.41e-07	6.15e-07	6.4977	341
119	4	9.7162	1.48e-07	2.74e-07	6.8445	148
120	4.2	10.079	7.6e-08	1.26e-07	7.2072	76
121	4.4	10.423	2.6e-08	5e-08	7.5513	26
122	4.6	10.846	1.3e-08	2.4e-08	7.9744	13
123	4.8	11.4	5e-09	1.1e-08	8.5282	5
124	5	11.25	4e-09	6e-09	8.3782	4
125	5.2	12.5	2e-09	2e-09	9.6282	2
126	5.4	0	0	0	0	0
127	5.6	0	0	0	0	0
128	5.8	0	0	0	0	0
129	6	0	0	0	0	0
130	6.2	0	0	0	0	0
131	6.4	0	0	0	0	0
132	6.6	0	0	0	0	0
133	6.8	0	0	0	0	0
134	7	0	0	0	0	0
135	7.2	0	0	0	0	0
136	7.4	0	0	0	0	0
137	7.6	0	0	0	0	0
138	7.8	0	0	0	0	0
139	8	0	0	0	0	0
140	8.2	0	0	0	0	0
141	8.4	0	0	0	0	0
142	8.6	0	0	0	0	0
143	8.8	0	0	0	0	0
144	9	0	0	0	0	0
145	9.2	0	0	0	0	0
146	9.4	0	0	0	0	0
147	9.6	0	0	0	0	0
148	9.8	0	0	0	0	0
149	10	0	0	0	0	0
150	10.2	0	0	0	0	0
151	10.4	0	0	0	0	0
152	10.6	0	0	0	0	0
153	10.8	0	0	0	0	0
154	11	0	0	0	0	0
155	11.2	0	0	0	0	0
156	11.4	0	0	0	0	0
157	11.6	0	0	0	0	0
158	11.8	0	0	0	0	0
159	12	0	0	0	0	0
160	12.2	0	0	0	0	0
161	12.4	0	0	0	0	0
162	12.6	0	0	0	0	0
163	12.8	0	0	0	0	0
164	13	0	0	0	0	0
165	13.2	0	0	0	0	0
166	13.4	0	0	0	0	0
167	13.6	0	0	0	0	0
168	13.8	0	0	0	0	0
169	14	0	0	0	0	0
170	14.2	0	0	0	0	0
171	14.4	0	0	0	0	0
172	14.6	0	0	0	0	0
173	14.8	0	0	0	0	0
174	15	0	0	0	0	0
175	15.2	0	0	0	0	0
176	15.4	0	0	0	0	0
177	15.6	0	0	0	0	0
178	15.8	0	0	0	0	0
179	16	0	0	0	0	0
180	16.2	0	0	0	0	0
181	16.4	0	0	0	0	0
182	16.6	0	0	0	0	0
183	16.8	0	0	0	0	0
184	17	0	0	0	0	0
185	17.2	0	0	0	0	0
186	17.4	0	0	0	0	0
187	17.6	0	0	0	0	0
188	17.8	0	0	0	0	0
189	18	0	0	0	0	0
190	18.2	0	0	0	0	0
191	18.4	0	0	0	0	0
192	18.6	0	0	0	0	0
193	18.8	0	0	0	0	0
194	19	0	0	0	0	0
195	19.2	0	0	0	0	0
196	19.4	0	0	0	0	0
197	19.6	0	0	0	0	0
198	19.8	0	0	0	0	0
199	20	0	0	0	0	0
