# Supplementary material for: Quantifying the Potential for Future Gene Therapy to Lower Lifetime Risk of Polygenic Late-Onset Diseases
Source: MDPI journal article supplement (doi:10.3390/ijms20133352), 2019-07-08
Supplement: s2 [file s2 › SuppFiles/Results/LODsRareMedium/LungCancer/0.250/FrailtyAnalysis.csv]

Age	Heritability	MeanOR	CaseOR	nControls	nCases	nCumIncidence	nIncidence	nLifeIncidence0	nAbsIncidence0	nLifeIncidence5	nAbsIncidence5	nLifeIncidence10	nAbsIncidence10	nLifeIncidence15	nAbsIncidence15	nIncActDivExp
27	0.0997708	0.126246	0.207164	999999787	213	2.13e-07	2.13e-07	2.09751e-07	2.09751e-07	2.10668e-07	2.10668e-07	2.11226e-07	2.11226e-07	2.11415e-07	2.11415e-07	0.245951
28	0.0997707	0.126246	0.20271	999999357	430	6.43e-07	4.3e-07	6.32783e-07	4.23032e-07	6.3563e-07	4.24963e-07	6.37487e-07	4.26261e-07	6.38177e-07	4.26762e-07	0.228498
29	0.0997707	0.126246	0.195185	999998550	807	1.45e-06	8.07001e-07	1.42593e-06	7.93144e-07	1.4325e-06	7.96868e-07	1.43711e-06	7.99628e-07	1.43901e-06	8.0083e-07	0.262601
30	0.0997705	0.126246	0.201051	999997436	1114	2.564e-06	1.114e-06	2.51969e-06	1.09376e-06	2.53153e-06	1.09903e-06	2.54036e-06	1.10324e-06	2.54431e-06	1.1053e-06	0.249217
31	0.0997704	0.126246	0.203793	999995905	1531	4.095e-06	1.531e-06	4.0213e-06	1.50161e-06	4.04058e-06	1.50905e-06	4.05565e-06	1.51529e-06	4.06301e-06	1.5187e-06	0.250659
32	0.0997701	0.126246	0.205524	999993983	1922	6.017e-06	1.92201e-06	5.90436e-06	1.88306e-06	5.93326e-06	1.89268e-06	5.95661e-06	1.90095e-06	5.969e-06	1.90599e-06	0.239405
33	0.0997698	0.126245	0.206043	999991411	2572	8.589e-06	2.57202e-06	8.42144e-06	2.51707e-06	8.46359e-06	2.53032e-06	8.49847e-06	2.54187e-06	8.51863e-06	2.54964e-06	0.250206
34	0.0997695	0.126245	0.19883	999988200	3211	1.18e-05	3.21103e-06	1.15602e-05	3.13878e-06	1.16195e-05	3.15587e-06	1.16692e-05	3.17069e-06	1.17003e-05	3.18167e-06	0.24856
35	0.099769	0.126245	0.20122	999984256	3944	1.5744e-05	3.94405e-06	1.54108e-05	3.85063e-06	1.54918e-05	3.87236e-06	1.55602e-05	3.89101e-06	1.56062e-05	3.90592e-06	0.246327
36	0.0997684	0.126245	0.203721	999979316	4940	2.0684e-05	4.94008e-06	2.02278e-05	4.81697e-06	2.0337e-05	4.84518e-06	2.04294e-05	4.86919e-06	2.04955e-05	4.88932e-06	0.251585
37	0.0997677	0.126244	0.205578	999973360	5956	2.664e-05	5.95612e-06	2.60278e-05	5.80001e-06	2.61723e-05	5.83533e-06	2.62945e-05	5.86514e-06	2.63863e-05	5.89078e-06	0.249395
38	0.0997669	0.126244	0.20198	999966155	7205	3.3845e-05	7.20519e-06	3.30344e-05	7.00654e-06	3.32235e-05	7.05114e-06	3.33827e-05	7.08824e-06	3.35069e-05	7.12059e-06	0.249691
39	0.0997659	0.126243	0.201966	999957443	8712	4.2557e-05	8.71229e-06	4.1494e-05	8.45961e-06	4.17395e-05	8.51607e-06	4.19452e-05	8.56241e-06	4.21095e-05	8.60262e-06	0.251209
40	0.0997646	0.126243	0.204477	999947143	10300	5.2857e-05	1.03004e-05	5.14801e-05	9.98616e-06	5.17957e-05	1.00561e-05	5.20581e-05	1.01129e-05	5.22712e-05	1.01616e-05	0.248197
41	0.0997633	0.126242	0.201776	999934995	12148	6.5005e-05	1.21486e-05	6.32389e-05	1.17587e-05	6.36411e-05	1.18455e-05	6.39729e-05	1.19148e-05	6.4245e-05	1.19739e-05	0.245517
42	0.0997615	0.126241	0.204039	999920344	14651	7.9656e-05	1.4652e-05	7.73959e-05	1.4157e-05	7.79084e-05	1.42673e-05	7.8327e-05	1.43542e-05	7.86725e-05	1.44275e-05	0.249106
43	0.0997595	0.12624	0.203373	999902751	17593	9.7249e-05	1.75944e-05	9.43643e-05	1.69684e-05	9.50168e-05	1.71084e-05	9.55443e-05	1.72173e-05	9.59804e-05	1.73079e-05	0.252304
44	0.099757	0.126239	0.205771	999882117	20634	0.000117883	2.0636e-05	0.000114226	1.98621e-05	0.000115053	2.00362e-05	0.000115714	2.01699e-05	0.00011626	2.02797e-05	0.250157
45	0.0997541	0.126237	0.203675	999857856	24261	0.000142144	2.42639e-05	0.00013753	2.33032e-05	0.000138575	2.35218e-05	0.000139401	2.36866e-05	0.00014008	2.38203e-05	0.24914
46	0.0997507	0.126236	0.203044	999828859	28997	0.000171141	2.90011e-05	0.000165317	2.7787e-05	0.000166643	2.80678e-05	0.000167676	2.82748e-05	0.000168521	2.84404e-05	0.252676
47	0.0997468	0.126234	0.203148	999795102	33757	0.000204898	3.37628e-05	0.000197582	3.22658e-05	0.000199261	3.26189e-05	0.000200549	3.28729e-05	0.000201594	3.30731e-05	0.250009
48	0.099742	0.126231	0.204029	999755145	39957	0.000244855	3.99652e-05	0.000235668	3.80854e-05	0.0002378	3.85385e-05	0.000239405	3.88564e-05	0.000240698	3.91037e-05	0.251901
49	0.0997365	0.126228	0.205056	999708672	46473	0.000291328	4.64844e-05	0.000279828	4.41605e-05	0.000282534	4.47344e-05	0.000284532	4.51267e-05	0.000286125	4.54278e-05	0.249759
50	0.09973	0.126225	0.204852	999654496	54176	0.000345504	5.41918e-05	0.000331135	5.13068e-05	0.000334572	5.20371e-05	0.000337057	5.25253e-05	0.000339019	5.28934e-05	0.248566
51	0.0997224	0.126221	0.203862	999590523	63973	0.000409477	6.39951e-05	0.000391496	6.03608e-05	0.000395875	6.13034e-05	0.00039898	6.1923e-05	0.000401399	6.23798e-05	0.250947
52	0.0997135	0.126217	0.205118	999516487	74036	0.000483513	7.40663e-05	0.000461066	6.95705e-05	0.00046664	7.07655e-05	0.00047052	7.15399e-05	0.000473496	7.2097e-05	0.248679
53	0.0997031	0.126211	0.204754	999429741	86746	0.000570259	8.6788e-05	0.000542216	8.115e-05	0.000549323	8.26828e-05	0.000554186	8.36665e-05	0.000557852	8.43566e-05	0.249893
54	0.0996911	0.126205	0.203821	999328330	101411	0.00067167	0.000101469	0.000636623	9.44065e-05	0.000645688	9.63648e-05	0.000651804	9.76172e-05	0.000656325	9.84731e-05	0.250985
55	0.099677	0.126198	0.20458	999211027	117303	0.000788973	0.000117382	0.000745244	0.000108621	0.000756779	0.000111091	0.000764475	0.000112672	0.000770054	0.000113729	0.249889
56	0.099661	0.12619	0.203284	999074301	136726	0.000925699	0.000136834	0.00087112	0.000125876	0.000885784	0.000129006	0.000895496	0.00013102	0.000902399	0.000132345	0.251225
57	0.0996421	0.12618	0.204179	998915662	158639	0.00108434	0.000158786	0.00101626	0.000145137	0.00103486	0.000149071	0.00104713	0.000151631	0.00105569	0.00015329	0.251994
58	0.0996205	0.126169	0.203454	998732790	182872	0.00126721	0.000183071	0.00118243	0.000166174	0.00120593	0.000171075	0.00122143	0.000174306	0.00123207	0.00017638	0.251767
59	0.0995957	0.126156	0.203527	998523402	209388	0.0014766	0.000209654	0.00137131	0.000188877	0.00140086	0.000194926	0.0014204	0.000198969	0.00143362	0.000201555	0.250555
60	0.0995672	0.126142	0.20356	998282369	241033	0.00171763	0.000241389	0.00158703	0.000215722	0.00162405	0.000223193	0.00164867	0.000228268	0.00166514	0.000231517	0.251472
61	0.0995345	0.126125	0.203675	998006627	275742	0.00199337	0.000276216	0.00183175	0.000244722	0.00187791	0.00025386	0.00190884	0.000260172	0.00192938	0.000264235	0.251706
62	0.0994973	0.126106	0.203617	997692042	314585	0.00230796	0.000315213	0.00210845	0.000276698	0.00216572	0.000287811	0.00220445	0.000295611	0.00223006	0.000300688	0.252217
63	0.0994552	0.126085	0.203491	997335806	356236	0.00266419	0.00035706	0.00241877	0.000310321	0.00248943	0.000323708	0.00253771	0.000333255	0.00256961	0.00033955	0.251915
64	0.0994078	0.12606	0.203273	996932461	403345	0.00306754	0.000404422	0.00276651	0.00034774	0.00285326	0.000363835	0.00291319	0.000375486	0.00295289	0.000383275	0.252739
65	0.0993544	0.126033	0.203288	996480463	451998	0.00351954	0.000453389	0.0031519	0.000385389	0.0032578	0.000404534	0.00333174	0.000418543	0.00338095	0.00042806	0.252217
66	0.0992946	0.126002	0.203365	995974575	505888	0.00402543	0.000507675	0.00357815	0.000426246	0.00370678	0.000448978	0.00379748	0.000465743	0.00385827	0.000477323	0.252728
67	0.0992286	0.125968	0.202604	995410181	564394	0.00458982	0.000566675	0.00404765	0.0004695	0.0042032	0.000496421	0.00431384	0.000516358	0.00438862	0.000530353	0.253867
68	0.0991558	0.125931	0.202737	994788977	621204	0.00521102	0.000624068	0.00455732	0.00050967	0.00474433	0.000541137	0.00487832	0.000564482	0.00496975	0.00058113	0.253087
69	0.0990758	0.12589	0.202443	994104473	684504	0.00589553	0.00068809	0.00511057	0.000553257	0.00533447	0.000590138	0.00549577	0.000617453	0.00560698	0.000637225	0.254161
70	0.0989884	0.125845	0.202408	993357167	747306	0.00664283	0.000751738	0.00570484	0.000594265	0.00597165	0.000637179	0.00616461	0.000668831	0.00629897	0.000691994	0.2545
71	0.0988949	0.125796	0.201883	992546954	810213	0.00745305	0.000815631	0.0063378	0.000632959	0.00665431	0.000682661	0.00688367	0.000719068	0.00704489	0.000745919	0.254706
72	0.0987938	0.125744	0.20181	991673736	873218	0.00832626	0.000879775	0.00700684	0.000669038	0.00738071	0.000726399	0.00765173	0.000768052	0.00784379	0.000798898	0.255042
73	0.0986859	0.125688	0.201283	990736331	937405	0.00926367	0.000945276	0.00770987	0.00070303	0.00814981	0.000769099	0.00846831	0.000816583	0.0086956	0.000851811	0.255996
74	0.0985709	0.125628	0.2015	989738157	998174	0.0102618	0.00100751	0.00844113	0.000731267	0.00895659	0.000806784	0.00932887	0.000860566	0.009596	0.000900398	0.256467
75	0.0984496	0.125565	0.201016	988681450	1056707	0.0113186	0.00106766	0.00919569	0.000754557	0.0097969	0.000840304	0.0102299	0.000900985	0.0105417	0.000945742	0.256984
76	0.0983229	0.125499	0.200445	987568623	1112827	0.0124314	0.00112557	0.00996837	0.00077268	0.0106663	0.000869368	0.0111675	0.000937635	0.0115294	0.00098764	0.257626
77	0.0981909	0.12543	0.200251	986403527	1165096	0.0135965	0.00117976	0.0107528	0.000784442	0.0115589	0.000892667	0.0121367	0.000969203	0.0125542	0.00102478	0.258153
78	0.098053	0.125357	0.200285	985190905	1212622	0.0148091	0.00122934	0.011542	0.000789144	0.0124684	0.000909436	0.0131316	0.000994902	0.0136105	0.00105633	0.258451
79	0.0979108	0.125283	0.199791	983932196	1258709	0.0160678	0.00127763	0.0123309	0.000788908	0.0133905	0.000922137	0.014149	0.00101736	0.0146957	0.00108518	0.259259
80	0.0977644	0.125206	0.199436	982631704	1300492	0.0173683	0.00132173	0.0131128	0.000781895	0.0143191	0.000928636	0.0151831	0.00103416	0.0158045	0.00110884	0.259967
81	0.0976146	0.125127	0.198853	981293261	1338443	0.0187067	0.0013621	0.0138813	0.000768501	0.0152485	0.000929335	0.0162288	0.00104563	0.0169322	0.00112773	0.260668
82	0.0974621	0.125046	0.198491	979921187	1372074	0.0200788	0.00139823	0.0146297	0.00074846	0.0161723	0.000923797	0.01728	0.00105125	0.0180736	0.00114138	0.261249
83	0.0973056	0.124963	0.198258	978517766	1403421	0.0214822	0.00143218	0.0153527	0.000723007	0.0170856	0.000913311	0.0183325	0.00105253	0.0192251	0.00115144	0.262062
84	0.0971481	0.124879	0.197663	977087889	1429877	0.0229121	0.00146127	0.0160439	0.00069116	0.0179818	0.00089619	0.0193801	0.00104754	0.0203808	0.00115571	0.262575
85	0.0969868	0.124794	0.197781	975632322	1455567	0.0243677	0.0014897	0.0166993	0.000655449	0.0188569	0.000875131	0.0204194	0.00103937	0.0215383	0.00115748	0.263504
86	0.0968243	0.124707	0.19711	974154922	1477400	0.0258451	0.0015143	0.0173142	0.000614879	0.0197052	0.000848286	0.0214453	0.00102582	0.0226924	0.00115418	0.264234
87	0.0966608	0.12462	0.196742	972658314	1496608	0.0273417	0.00153631	0.0178848	0.000570559	0.0205216	0.000816392	0.0224529	0.00100764	0.0238391	0.00114666	0.264944
88	0.0964965	0.124532	0.19626	971145487	1512827	0.0288545	0.00155535	0.0184077	0.000522939	0.021301	0.000779371	0.0234374	0.00098451	0.0249737	0.00113458	0.265524
89	0.0963309	0.124443	0.195979	969617775	1527712	0.0303822	0.0015731	0.018881	0.000473278	0.0220394	0.00073845	0.0243949	0.000957509	0.0260929	0.00111921	0.266224
90	0.096164	0.124353	0.195703	968077881	1539894	0.0319221	0.00158815	0.0193029	0.000421939	0.0227328	0.000693422	0.0253207	0.00092583	0.0271925	0.00109958	0.266765
91	0.0959967	0.124263	0.195337	966527529	1550352	0.0334725	0.00160147	0.0196731	0.000370201	0.0233781	0.000645241	0.0262109	0.000890173	0.028269	0.00107647	0.26728
92	0.0958287	0.124172	0.195048	964967095	1560434	0.0350329	0.00161447	0.0199925	0.000319413	0.023973	0.000594892	0.0270621	0.000851209	0.0293196	0.00105062	0.267968
93	0.0956607	0.124082	0.194633	963399214	1567881	0.0366008	0.0016248	0.0202627	0.000270177	0.0245149	0.000541969	0.0278699	0.000807733	0.0303399	0.00102034	0.268412
94	0.0954924	0.12399	0.194258	961820544	1578670	0.0381795	0.00163865	0.0204872	0.000224503	0.025004	0.000489064	0.0286329	0.000763082	0.0313294	0.000989447	0.269606
95	0.095324	0.123899	0.193842	960236085	1584459	0.0397639	0.00164735	0.0206692	0.000181999	0.0254381	0.00043415	0.0293464	0.00071349	0.032282	0.000952624	0.270103
96	0.0951566	0.123808	0.193287	958646753	1589332	0.0413532	0.00165515	0.0208133	0.000144057	0.0258177	0.000379509	0.0300079	0.000661464	0.0331945	0.000912555	0.270579
97	0.0949897	0.123716	0.192934	957054698	1592055	0.0429453	0.00166073	0.0209245	0.000111189	0.0261435	0.000325886	0.0306148	0.000606947	0.034063	0.000868458	0.270806
98	0.0948228	0.123625	0.192457	955456358	1598340	0.0445436	0.00167006	0.0210084	8.39768e-05	0.026419	0.000275426	0.0311673	0.000552498	0.0348864	0.000823425	0.271739
99	0.0946552	0.123533	0.192334	953856261	1600097	0.0461437	0.00167469	0.0210702	6.17557e-05	0.0266465	0.00022755	0.031663	0.000495702	0.0356599	0.000773439	0.271991
100	0.0944888	0.123442	0.191556	952251812	1604449	0.0477482	0.00168207	0.0211147	4.44673e-05	0.0268308	0.000184295	0.0321027	0.000439627	0.0363824	0.000722491	0.272758
101	0.0943224	0.123351	0.19142	950645614	1606198	0.0493544	0.00168674	0.0211459	3.12727e-05	0.0269764	0.000145586	0.0324862	0.000383536	0.0370508	0.000668484	0.273147
102	0.0941557	0.123259	0.191161	949034504	1611110	0.0509655	0.00169475	0.0211675	2.15325e-05	0.0270889	0.00011252	0.032816	0.000329786	0.037665	0.000614212	0.274131
103	0.0939894	0.123167	0.190852	947421560	1612944	0.0525784	0.00169956	0.0211819	1.44197e-05	0.0271737	8.47441e-05	0.0330939	0.000277943	0.0382226	0.000557546	0.274639
104	0.0938246	0.123076	0.190316	945809262	1612298	0.0541907	0.00170177	0.0211913	9.37551e-06	0.0272359	6.22266e-05	0.0333232	0.000229285	0.0387221	0.000499482	0.274767
105	0.0936587	0.122984	0.190101	944192063	1617199	0.0558079	0.00170986	0.0211972	5.93512e-06	0.0272807	4.48207e-05	0.033509	0.00018576	0.0391652	0.000443121	0.275875
106	0.0934944	0.122893	0.189716	942574346	1617717	0.0574257	0.00171333	0.0212008	3.62369e-06	0.0273122	3.14969e-05	0.0336556	0.00014663	0.0395515	0.000386287	0.276268
107	0.0933298	0.122801	0.189351	940955210	1619136	0.0590448	0.00171778	0.021203	2.12916e-06	0.0273338	2.16398e-05	0.0337687	0.00011308	0.0398829	0.000331429	0.276841
108	0.0931658	0.12271	0.188914	939334572	1620638	0.0606654	0.00172233	0.0212042	1.20738e-06	0.0273483	1.44885e-05	0.0338538	8.51483e-05	0.0401622	0.000279268	0.277452
109	0.0930033	0.122619	0.188359	937710918	1623654	0.0622891	0.00172852	0.0212048	6.49462e-07	0.0273578	9.44155e-06	0.0339165	6.26649e-05	0.0403931	0.0002309	0.278343
110	0.0928398	0.122528	0.188381	936087673	1623245	0.0639123	0.00173107	0.0212051	3.32765e-07	0.0273637	5.95731e-06	0.0339615	4.49882e-05	0.0405795	0.000186454	0.278665
111	0.0926779	0.122437	0.187899	934467318	1620355	0.0655327	0.00173099	0.0212053	1.62036e-07	0.0273674	3.6296e-06	0.033993	3.15483e-05	0.0407264	0.000146869	0.278575
112	0.092516	0.122346	0.187439	932842229	1625089	0.0671578	0.00173905	0.0212054	7.3129e-08	0.0273695	2.13699e-06	0.0340148	2.17193e-05	0.0408399	0.000113496	0.279808
113	0.092355	0.122256	0.187154	931218185	1624044	0.0687818	0.00174096	0.0212054	3.24809e-08	0.0273707	1.20991e-06	0.0340293	1.4519e-05	0.0409252	8.53273e-05	0.280059
114	0.0921944	0.122165	0.186797	929594602	1623583	0.0704054	0.0017435	0.0212054	8.11791e-09	0.0273714	6.49433e-07	0.0340387	9.44114e-06	0.0409879	6.26622e-05	0.28042
115	0.092035	0.122075	0.186452	927972721	1621881	0.0720273	0.00174472	0.0212054	0	0.0273717	3.32486e-07	0.0340447	5.9523e-06	0.0410328	4.49504e-05	0.280575
116	0.0918755	0.121985	0.186007	926348576	1624145	0.0736514	0.00175021	0.0212054	0	0.0273718	1.62415e-07	0.0340483	3.63808e-06	0.0410645	3.16221e-05	0.281422
117	0.0917161	0.121895	0.18583	924723820	1624756	0.0752762	0.00175394	0.0212054	0	0.0273719	7.3114e-08	0.0340504	2.13655e-06	0.0410862	2.17149e-05	0.281992
118	0.0915577	0.121805	0.18543	923098726	1625094	0.0769013	0.00175738	0.0212054	0	0.027372	3.25019e-08	0.0340517	1.2107e-06	0.0411007	1.45283e-05	0.282521
119	0.0913996	0.121715	0.185144	921474289	1624437	0.0785257	0.00175977	0.0212054	0	0.027372	8.12218e-09	0.0340523	6.49775e-07	0.0411101	9.4461e-06	0.282882
120	0.091241	0.121625	0.184932	919847393	1626896	0.0801526	0.00176554	0.0212054	0	0.027372	0	0.0340526	3.33514e-07	0.0411161	5.97071e-06	0.283791
