# Supplementary material for: Quantifying the Potential for Future Gene Therapy to Lower Lifetime Risk of Polygenic Late-Onset Diseases
Source: MDPI journal article supplement (doi:10.3390/ijms20133352), 2019-07-08
Supplement: s2 [file s2 › SuppFiles/Results/LODsRareMedium/LungCancer/0.250/IndividualsByBetaDistrib.csv]

nEntry	Beta	nDetrimentalCount	nFractionPopulation	nCumulativeFractionPopulation	nEditsNeeded	nIndividuals
0	-19.8	0	0	1	0	0
1	-19.6	0	0	1	0	0
2	-19.4	0	0	1	0	0
3	-19.2	0	0	1	0	0
4	-19	0	0	1	0	0
5	-18.8	0	0	1	0	0
6	-18.6	0	0	1	0	0
7	-18.4	0	0	1	0	0
8	-18.2	0	0	1	0	0
9	-18	0	0	1	0	0
10	-17.8	0	0	1	0	0
11	-17.6	0	0	1	0	0
12	-17.4	0	0	1	0	0
13	-17.2	0	0	1	0	0
14	-17	0	0	1	0	0
15	-16.8	0	0	1	0	0
16	-16.6	0	0	1	0	0
17	-16.4	0	0	1	0	0
18	-16.2	0	0	1	0	0
19	-16	0	0	1	0	0
20	-15.8	0	0	1	0	0
21	-15.6	0	0	1	0	0
22	-15.4	0	0	1	0	0
23	-15.2	0	0	1	0	0
24	-15	0	0	1	0	0
25	-14.8	0	0	1	0	0
26	-14.6	0	0	1	0	0
27	-14.4	0	0	1	0	0
28	-14.2	0	0	1	0	0
29	-14	0	0	1	0	0
30	-13.8	0	0	1	0	0
31	-13.6	0	0	1	0	0
32	-13.4	0	0	1	0	0
33	-13.2	0	0	1	0	0
34	-13	0	0	1	0	0
35	-12.8	0	0	1	0	0
36	-12.6	0	0	1	0	0
37	-12.4	0	0	1	0	0
38	-12.2	0	0	1	0	0
39	-12	0	0	1	0	0
40	-11.8	0	0	1	0	0
41	-11.6	0	0	1	0	0
42	-11.4	0	0	1	0	0
43	-11.2	0	0	1	0	0
44	-11	0	0	1	0	0
45	-10.8	0	0	1	0	0
46	-10.6	0	0	1	0	0
47	-10.4	0	0	1	0	0
48	-10.2	0	0	1	0	0
49	-10	0	0	1	0	0
50	-9.8	0	0	1	0	0
51	-9.6	0	0	1	0	0
52	-9.4	0	0	1	0	0
53	-9.2	0	0	1	0	0
54	-9	0	0	1	0	0
55	-8.8	0	0	1	0	0
56	-8.6	0	0	1	0	0
57	-8.4	0	0	1	0	0
58	-8.2	0	0	1	0	0
59	-8	0	0	1	0	0
60	-7.8	0	0	1	0	0
61	-7.6	0	0	1	0	0
62	-7.4	0	0	1	0	0
63	-7.2	0	0	1	0	0
64	-7	0	0	1	0	0
65	-6.8	0	0	1	0	0
66	-6.6	0	0	1	0	0
67	-6.4	0	0	1	0	0
68	-6.2	0	0	1	0	0
69	-6	0	0	1	0	0
70	-5.8	0	0	1	0	0
71	-5.6	0	0	1	0	0
72	-5.4	0	0	1	0	0
73	-5.2	0	0	1	0	0
74	-5	0	0	1	0	0
75	-4.8	0	0	1	0	0
76	-4.6	0	0	1	0	0
77	-4.4	0	0	1	0	0
78	-4.2	0	0	1	0	0
79	-4	0	0	1	0	0
80	-3.8	0	0	1	0	0
81	-3.6	0	0	1	0	0
82	-3.4	0	0	1	0	0
83	-3.2	0	0	1	0	0
84	-3	0	0	1	0	0
85	-2.8	0	0	1	0	0
86	-2.6	0	0	1	0	0
87	-2.4	0	0	1	0	0
88	-2.2	0	0	1	0	0
89	-2	0	0	1	0	0
90	-1.8	0	0	1	0	0
91	-1.6	0	0	1	0	0
92	-1.4	0	0.2277625	1	0	227762499
93	-1.2	1	0.13737603	0.7722375	0	137376026
94	-1	1.1161	0.077716229	0.63486148	0	77716229
95	-0.8	1.2748	0.18850802	0.55714525	0	188508020
96	-0.6	2.0325	0.08563017	0.36863723	0	85630170
97	-0.4	2.2356	0.065747346	0.28300706	0	65747346
98	-0.2	2.4252	0.08461001	0.21725971	0	84610010
99	0	2.8717	0.045938402	0.1326497	0	45938402
100	0.2	3.2892	0.027488982	0.086711298	0.41741	27488982
101	0.4	3.5356	0.024706212	0.059222316	0.66387	24706212
102	0.6	3.8737	0.014427044	0.034516104	1.002	14427044
103	0.8	4.3304	0.00764269	0.02008906	1.4586	7642690
104	1	4.6168	0.005578301	0.01244637	1.745	5578301
105	1.2	4.895	0.003217165	0.006868069	2.0232	3217165
106	1.4	5.3637	0.001569384	0.003650904	2.492	1569384
107	1.6	5.6769	0.00099784	0.00208152	2.8051	997840
108	1.8	5.9328	0.000548657	0.00108368	3.0611	548657
109	2	6.3771	0.000252255	0.000535023	3.5054	252255
110	2.2	6.7199	0.000142486	0.000282768	3.8481	142486
111	2.4	6.9824	7.4212e-05	0.000140282	4.1106	74212
112	2.6	7.3909	3.3827e-05	6.607e-05	4.5192	33827
113	2.8	7.7507	1.7141e-05	3.2243e-05	4.8789	17141
114	3	8.0292	8.343e-06	1.5102e-05	5.1575	8343
115	3.2	8.4133	3.673e-06	6.759e-06	5.5415	3673
116	3.4	8.8097	1.676e-06	3.086e-06	5.9379	1676
117	3.6	9.0742	8.22e-07	1.41e-06	6.2025	822
118	3.8	9.4167	3.12e-07	5.88e-07	6.5449	312
119	4	9.9	1.8e-07	2.76e-07	7.0283	180
120	4.2	10.07	5.7e-08	9.6e-08	7.1984	57
121	4.4	10.28	2.5e-08	3.9e-08	7.4083	25
122	4.6	11.2	5e-09	1.4e-08	8.3283	5
123	4.8	10.714	7e-09	9e-09	7.8425	7
124	5	0	0	2e-09	0	0
125	5.2	12	2e-09	2e-09	9.1283	2
126	5.4	0	0	0	0	0
127	5.6	0	0	0	0	0
128	5.8	0	0	0	0	0
129	6	0	0	0	0	0
130	6.2	0	0	0	0	0
131	6.4	0	0	0	0	0
132	6.6	0	0	0	0	0
133	6.8	0	0	0	0	0
134	7	0	0	0	0	0
135	7.2	0	0	0	0	0
136	7.4	0	0	0	0	0
137	7.6	0	0	0	0	0
138	7.8	0	0	0	0	0
139	8	0	0	0	0	0
140	8.2	0	0	0	0	0
141	8.4	0	0	0	0	0
142	8.6	0	0	0	0	0
143	8.8	0	0	0	0	0
144	9	0	0	0	0	0
145	9.2	0	0	0	0	0
146	9.4	0	0	0	0	0
147	9.6	0	0	0	0	0
148	9.8	0	0	0	0	0
149	10	0	0	0	0	0
150	10.2	0	0	0	0	0
151	10.4	0	0	0	0	0
152	10.6	0	0	0	0	0
153	10.8	0	0	0	0	0
154	11	0	0	0	0	0
155	11.2	0	0	0	0	0
156	11.4	0	0	0	0	0
157	11.6	0	0	0	0	0
158	11.8	0	0	0	0	0
159	12	0	0	0	0	0
160	12.2	0	0	0	0	0
161	12.4	0	0	0	0	0
162	12.6	0	0	0	0	0
163	12.8	0	0	0	0	0
164	13	0	0	0	0	0
165	13.2	0	0	0	0	0
166	13.4	0	0	0	0	0
167	13.6	0	0	0	0	0
168	13.8	0	0	0	0	0
169	14	0	0	0	0	0
170	14.2	0	0	0	0	0
171	14.4	0	0	0	0	0
172	14.6	0	0	0	0	0
173	14.8	0	0	0	0	0
174	15	0	0	0	0	0
175	15.2	0	0	0	0	0
176	15.4	0	0	0	0	0
177	15.6	0	0	0	0	0
178	15.8	0	0	0	0	0
179	16	0	0	0	0	0
180	16.2	0	0	0	0	0
181	16.4	0	0	0	0	0
182	16.6	0	0	0	0	0
183	16.8	0	0	0	0	0
184	17	0	0	0	0	0
185	17.2	0	0	0	0	0
186	17.4	0	0	0	0	0
187	17.6	0	0	0	0	0
188	17.8	0	0	0	0	0
189	18	0	0	0	0	0
190	18.2	0	0	0	0	0
191	18.4	0	0	0	0	0
192	18.6	0	0	0	0	0
193	18.8	0	0	0	0	0
194	19	0	0	0	0	0
195	19.2	0	0	0	0	0
196	19.4	0	0	0	0	0
197	19.6	0	0	0	0	0
198	19.8	0	0	0	0	0
199	20	0	0	0	0	0
