# Supplementary material for: Quantifying the Potential for Future Gene Therapy to Lower Lifetime Risk of Polygenic Late-Onset Diseases
Source: MDPI journal article supplement (doi:10.3390/ijms20133352), 2019-07-08
Supplement: s2 [file s2 › SuppFiles/Results/LODsRareMedium/LungCancer/1.000/FrailtyAnalysis.csv]

Age	Heritability	MeanOR	CaseOR	nControls	nCases	nCumIncidence	nIncidence	nLifeIncidence0	nAbsIncidence0	nLifeIncidence5	nAbsIncidence5	nLifeIncidence10	nAbsIncidence10	nLifeIncidence15	nAbsIncidence15	nIncActDivExp
27	0.0997768	0.504984	0.830881	999999091	909	9.09e-07	9.09e-07	8.95133e-07	8.95133e-07	8.99046e-07	8.99046e-07	9.01428e-07	9.01428e-07	9.02237e-07	9.02237e-07	1.04962
28	0.0997766	0.504984	0.812942	999997210	1881	2.79e-06	1.881e-06	2.74565e-06	1.85052e-06	2.75801e-06	1.85897e-06	2.76607e-06	1.86465e-06	2.76907e-06	1.86684e-06	0.999547
29	0.0997762	0.504983	0.818437	999994097	3113	5.903e-06	3.11301e-06	5.8052e-06	3.05956e-06	5.83193e-06	3.07392e-06	5.85064e-06	3.08457e-06	5.85827e-06	3.08921e-06	1.01298
30	0.0997757	0.504982	0.811813	999989665	4432	1.0335e-05	4.43203e-06	1.01567e-05	4.35152e-06	1.02044e-05	4.37248e-06	1.02398e-05	4.38923e-06	1.02557e-05	4.39741e-06	0.991503
31	0.099775	0.504981	0.812648	999983523	6142	1.6477e-05	6.14206e-06	1.61808e-05	6.02417e-06	1.62583e-05	6.05402e-06	1.63188e-05	6.07905e-06	1.63483e-05	6.09271e-06	1.00559
32	0.0997741	0.504979	0.814257	999975389	8134	2.4611e-05	8.13413e-06	2.415e-05	7.96934e-06	2.42683e-05	8.01005e-06	2.43638e-05	8.04507e-06	2.44146e-05	8.06638e-06	1.01318
33	0.0997729	0.504976	0.80995	999965221	10168	3.4779e-05	1.01683e-05	3.41009e-05	9.95111e-06	3.42715e-05	1.00035e-05	3.44126e-05	1.00491e-05	3.44941e-05	1.00798e-05	0.98917
34	0.0997714	0.504973	0.815758	999952281	12940	4.7719e-05	1.29405e-05	4.67498e-05	1.26494e-05	4.69893e-05	1.27183e-05	4.71902e-05	1.2778e-05	4.73159e-05	1.28222e-05	1.0017
35	0.0997694	0.504969	0.819518	999936477	15804	6.3523e-05	1.58048e-05	6.21797e-05	1.54306e-05	6.25062e-05	1.55177e-05	6.27819e-05	1.55924e-05	6.29673e-05	1.56522e-05	0.987093
36	0.0997671	0.504964	0.818638	999916652	19825	8.3348e-05	1.98263e-05	8.15109e-05	1.93325e-05	8.19507e-05	1.94457e-05	8.23227e-05	1.9542e-05	8.25889e-05	1.96228e-05	1.0097
37	0.0997642	0.504959	0.814553	999892942	23710	0.000107058	2.3712e-05	0.0001046	2.3091e-05	0.00010518	2.32316e-05	0.000105671	2.33503e-05	0.000106039	2.34523e-05	0.992869
38	0.0997607	0.504951	0.825501	999863940	29002	0.00013606	2.90051e-05	0.000132803	2.82062e-05	0.000133563	2.83857e-05	0.000134203	2.85351e-05	0.000134702	2.86653e-05	1.00515
39	0.0997565	0.504943	0.815602	999829097	34843	0.000170903	3.48477e-05	0.000166637	3.38382e-05	0.000167622	3.4064e-05	0.000168448	3.42494e-05	0.000169107	3.44102e-05	1.00479
40	0.0997516	0.504933	0.813064	999787302	41795	0.000212698	4.18021e-05	0.000207158	4.05284e-05	0.000208428	4.08125e-05	0.000209484	4.10428e-05	0.000210341	4.12405e-05	1.00726
41	0.0997458	0.504921	0.81549	999737801	49501	0.000262199	4.95115e-05	0.000255073	4.79249e-05	0.000256696	4.82784e-05	0.000258034	4.85612e-05	0.000259132	4.88018e-05	1.0006
42	0.0997388	0.504907	0.815957	999678527	59274	0.000321473	5.92895e-05	0.000312349	5.72906e-05	0.000314418	5.77368e-05	0.000316107	5.80883e-05	0.000317502	5.83851e-05	1.00801
43	0.0997305	0.50489	0.818657	999608764	69763	0.000391236	6.97854e-05	0.000379635	6.73081e-05	0.000382259	6.78632e-05	0.000384381	6.82952e-05	0.000386134	6.86546e-05	1.00073
44	0.0997206	0.50487	0.817174	999526299	82465	0.000473701	8.24973e-05	0.000459015	7.94111e-05	0.000462335	8.01073e-05	0.000464991	8.06419e-05	0.000467183	8.10808e-05	1.00006
45	0.0997091	0.504846	0.815441	999428985	97314	0.000571015	9.73601e-05	0.000552487	9.35163e-05	0.000556684	9.43936e-05	0.000560001	9.50551e-05	0.00056273	9.55916e-05	0.999688
46	0.0996955	0.504818	0.81585	999314451	114534	0.000685549	0.000114599	0.000662241	0.000109817	0.000667548	0.000110927	0.000671683	0.000111745	0.000675065	0.0001124	0.998461
47	0.0996794	0.504785	0.816329	999179460	134991	0.00082054	0.000135084	0.000791269	0.000129116	0.000797987	0.000130529	0.000803138	0.000131546	0.000807321	0.000132347	1.00028
48	0.0996608	0.504747	0.813885	999020475	158985	0.000979525	0.000159116	0.000942807	0.000151663	0.000951328	0.000153467	0.000957744	0.000154733	0.000962911	0.000155718	1.00291
49	0.0996385	0.504702	0.820226	998834967	185508	0.00116503	0.00018569	0.00111908	0.00017645	0.0011299	0.000178743	0.00113788	0.00018031	0.00114425	0.000181514	0.997707
50	0.0996122	0.504648	0.817239	998616955	218012	0.00138305	0.000218266	0.00132555	0.000206707	0.0013393	0.000209649	0.00134925	0.000211616	0.0013571	0.000213099	1.00114
51	0.0995821	0.504587	0.815075	998362964	253991	0.00163704	0.000254343	0.0015652	0.000239981	0.00158269	0.000243729	0.0015951	0.000246192	0.00160476	0.000248008	0.997364
52	0.0995466	0.504515	0.814989	998064736	298228	0.00193526	0.000298717	0.00184544	0.0002807	0.00186775	0.000285521	0.00188327	0.000288646	0.00189518	0.000290894	1.00295
53	0.0995056	0.504431	0.815945	997719100	345636	0.0022809	0.000346306	0.00216878	0.000323966	0.00219719	0.000330085	0.00221664	0.000334012	0.0022313	0.000336767	0.997136
54	0.0994576	0.504332	0.815784	997315088	404012	0.00268491	0.000404936	0.00254489	0.000376967	0.0025811	0.000384786	0.00260554	0.000389787	0.0026236	0.000393205	1.00162
55	0.0994023	0.504219	0.813535	996846189	468899	0.00315381	0.000470161	0.00297908	0.000435362	0.00302517	0.000445262	0.00305592	0.000451599	0.00307822	0.000455836	1.00091
56	0.0993383	0.504088	0.81245	996303271	542918	0.00369673	0.000544636	0.00347891	0.000501416	0.00353743	0.000513883	0.00357618	0.000521908	0.00360374	0.000527183	0.999944
57	0.0992647	0.503936	0.810987	995674195	629076	0.00432581	0.00063141	0.00405445	0.000577671	0.00412856	0.000593327	0.00417747	0.000603518	0.0042116	0.000610122	1.00205
58	0.09918	0.503762	0.810772	994950715	723480	0.00504928	0.000726623	0.00471187	0.000660275	0.00480537	0.000679749	0.00486706	0.000692588	0.0049094	0.000700828	0.999285
59	0.0990828	0.503562	0.810147	994119004	831711	0.005881	0.000835932	0.00546211	0.000754048	0.00557964	0.000778194	0.00565739	0.000794336	0.00571	0.00080466	0.999012
60	0.0989723	0.503333	0.808024	993164387	954617	0.00683561	0.000960264	0.00631648	0.000859427	0.0064636	0.00088919	0.00656145	0.000909409	0.00662692	0.000922353	1.00038
61	0.0988464	0.503072	0.806495	992073379	1091008	0.00792662	0.00109852	0.00728476	0.000974939	0.00746803	0.00101134	0.00759085	0.00103649	0.0076724	0.00105268	1.00104
62	0.0987032	0.502775	0.806443	990833290	1240089	0.00916671	0.00125	0.0083755	0.00109945	0.00860257	0.00114361	0.00875615	0.0011746	0.00885771	0.00119478	1.00018
63	0.0985413	0.502439	0.80495	989427735	1405555	0.0105723	0.00141856	0.00959989	0.00123572	0.00987979	0.00128903	0.010071	0.00132705	0.0101974	0.00135211	1.00083
64	0.0983603	0.502062	0.802718	987844443	1583292	0.0121556	0.00160021	0.0109649	0.0013796	0.011308	0.00144346	0.011545	0.00148968	0.0117019	0.00152058	1.00003
65	0.0981576	0.501639	0.801501	986066461	1777982	0.0139335	0.00179986	0.0124809	0.00153462	0.0128993	0.00161086	0.0131913	0.00166664	0.0133858	0.00170454	1.00125
66	0.0979338	0.501169	0.798449	984083070	1983391	0.0159169	0.00201142	0.014152	0.00169476	0.0146595	0.00178514	0.0150173	0.0018518	0.0152572	0.00189784	1.00131
67	0.0976861	0.500648	0.797343	981883066	2200004	0.0181169	0.00223559	0.0159821	0.00185971	0.0165946	0.00196634	0.0170301	0.00204532	0.0173245	0.00210075	1.00153
68	0.0974169	0.500078	0.793845	979464129	2418937	0.0205359	0.00246357	0.0179668	0.00202125	0.0187017	0.00214604	0.0192282	0.00223862	0.0195874	0.00230464	0.999084
69	0.0971231	0.499455	0.791744	976814216	2649913	0.0231858	0.00270547	0.0201086	0.00218672	0.0209863	0.0023325	0.0216185	0.00244046	0.0220542	0.00251861	0.999325
70	0.0968048	0.498779	0.789144	973930182	2884034	0.0260698	0.00295249	0.022402	0.00234785	0.0234454	0.0025174	0.0241997	0.00264245	0.0247248	0.00273396	0.999561
71	0.0964639	0.49805	0.78627	970809502	3120680	0.0291905	0.00320421	0.0248399	0.00250321	0.0260748	0.00269977	0.0269693	0.00284376	0.0275979	0.00294994	1.00061
72	0.0961026	0.497271	0.78264	967459370	3350132	0.0325406	0.00345086	0.0274067	0.00264397	0.0288616	0.00287065	0.029916	0.00303526	0.0306629	0.00315716	1.00039
73	0.0957202	0.496445	0.778663	963884336	3575034	0.0361157	0.00369528	0.0300879	0.00277137	0.0317948	0.00303181	0.0330302	0.003219	0.0339115	0.00335786	1.00074
74	0.0953173	0.49557	0.776034	960094229	3790107	0.0399058	0.00393212	0.0328646	0.00288069	0.0348582	0.00317817	0.0362978	0.00339004	0.0373303	0.00354695	1.00095
75	0.0948992	0.494656	0.771225	956101700	3992529	0.0438983	0.00415848	0.0357155	0.00296942	0.0380331	0.00330686	0.039702	0.00354566	0.0409036	0.00372179	1.00093
76	0.0944655	0.493703	0.767624	951924017	4177683	0.048076	0.0043695	0.0386162	0.00303392	0.0412968	0.00341356	0.043222	0.00368161	0.0446113	0.00387795	1.00011
77	0.0940171	0.492714	0.763864	947570865	4353152	0.0524291	0.004573	0.0415471	0.00307893	0.044632	0.00350372	0.0468432	0.00380412	0.0484402	0.00402225	1.00065
78	0.093557	0.491694	0.760038	943062757	4508108	0.0569372	0.00475754	0.0444809	0.00309609	0.048013	0.00356804	0.0505419	0.00390335	0.0523672	0.00414434	1.00021
79	0.0930879	0.490648	0.755733	938415516	4647241	0.0615845	0.00492782	0.0473936	0.00308856	0.0514176	0.00361014	0.0542981	0.00398296	0.0563738	0.00424847	0.99996
80	0.0926122	0.489581	0.751499	933646255	4769261	0.0663537	0.00508225	0.050261	0.0030556	0.0548232	0.00362906	0.0580907	0.00404145	0.0604402	0.0043333	0.999611
81	0.0921301	0.488494	0.747333	928765139	4881116	0.0712349	0.00522801	0.0530636	0.0030018	0.0582123	0.00363002	0.0619039	0.00408426	0.0645529	0.00440497	1.0005
82	0.0916421	0.48739	0.743829	923792785	4972354	0.0762072	0.00535373	0.055776	0.00292043	0.0615601	0.00360458	0.0657136	0.00410189	0.0686892	0.00445358	1.0003
83	0.0911505	0.486272	0.740149	918744606	5048179	0.0812554	0.00546462	0.0583767	0.00281524	0.0648454	0.00355624	0.0694996	0.00409833	0.0728311	0.00448348	0.999923
84	0.0906584	0.485147	0.735284	913629133	5115473	0.0863709	0.00556789	0.0608494	0.00269135	0.0680515	0.00348973	0.0732472	0.00407907	0.0769657	0.00450031	1.00049
85	0.0901662	0.484016	0.731523	908465262	5163871	0.0915347	0.00565204	0.0631747	0.00254514	0.0711562	0.00339818	0.0769346	0.00403593	0.081072	0.00449456	0.999757
86	0.0896754	0.482882	0.727191	903259991	5205271	0.09674	0.00572974	0.0653411	0.00238466	0.0741449	0.00328987	0.0805488	0.00397839	0.0851385	0.00447622	0.999798
87	0.0891846	0.481744	0.723491	898019560	5240431	0.10198	0.00580169	0.0673389	0.00221181	0.0770036	0.00316479	0.0840771	0.00390619	0.0891536	0.00444511	1.00052
88	0.0886966	0.480609	0.718945	892757113	5262447	0.107243	0.00586006	0.069158	0.00202565	0.0797147	0.00301896	0.0875018	0.00381358	0.0931003	0.0043949	1.00041
89	0.0882102	0.479472	0.715712	887481346	5275767	0.112519	0.00590952	0.0707924	0.00183074	0.0822648	0.00285649	0.0908084	0.00370385	0.0969654	0.00432934	1.0001
90	0.0877276	0.478339	0.711818	882198576	5282770	0.117801	0.00595254	0.0722399	0.00163103	0.0846437	0.00268046	0.0939846	0.00357885	0.100738	0.0042505	0.999863
91	0.0872489	0.47721	0.707905	876912307	5286269	0.123088	0.00599215	0.0735022	0.00143084	0.0868438	0.00249387	0.0970198	0.00344054	0.104408	0.00416059	1.00007
92	0.0867741	0.476087	0.704017	871628987	5283320	0.128371	0.00602491	0.0745837	0.00123327	0.0888579	0.00229691	0.0999018	0.00328656	0.107965	0.00405648	1.00001
93	0.0863031	0.474966	0.700742	866348728	5280259	0.133651	0.00605792	0.0754936	0.0010439	0.0906832	0.00209404	0.102622	0.00312089	0.111402	0.00394234	1.00075
94	0.0858363	0.473852	0.697267	861079594	5269134	0.13892	0.006082	0.0762429	0.000864921	0.0923155	0.00188417	0.105169	0.00293986	0.114704	0.00381196	1.00067
95	0.0853747	0.472746	0.693465	855830109	5249485	0.14417	0.0060964	0.0768459	0.000700263	0.0937539	0.00167044	0.107533	0.00274524	0.11786	0.00366534	0.999576
96	0.0849181	0.471649	0.689632	850593050	5237059	0.149407	0.00611927	0.0773206	0.000554651	0.0950044	0.00146119	0.109713	0.00254678	0.120867	0.00351353	1.00036
97	0.0844668	0.47056	0.685671	845373443	5219607	0.154627	0.00613643	0.0776851	0.000428568	0.0960729	0.0012561	0.111702	0.00233942	0.123714	0.00334739	1.00063
98	0.0840193	0.469476	0.683256	840176061	5197382	0.159824	0.00614803	0.0779582	0.000323018	0.0969685	0.00105943	0.113499	0.00212519	0.126392	0.00316731	1.00036
99	0.0835771	0.468401	0.679559	835003069	5172992	0.164997	0.00615703	0.0781578	0.000237631	0.0977041	0.000875592	0.115102	0.00190742	0.128892	0.00297613	0.999977
100	0.0831381	0.467335	0.676447	829856718	5146351	0.170143	0.00616327	0.0783004	0.000170815	0.0982953	0.000707944	0.116512	0.00168877	0.13121	0.00277535	0.999414
101	0.0827044	0.466276	0.673174	824727742	5128976	0.175272	0.00618056	0.0784003	0.000120335	0.0987602	0.000560206	0.117736	0.00147582	0.133345	0.00257229	1.00087
102	0.0822758	0.465225	0.670238	819630887	5096855	0.180369	0.00618005	0.0784684	8.25963e-05	0.0991161	0.000431614	0.11878	0.00126502	0.135288	0.00235605	0.999638
103	0.0818514	0.464183	0.666925	814559260	5071627	0.185441	0.0061877	0.0785138	5.5318e-05	0.0993826	0.000325102	0.119654	0.00106626	0.137041	0.0021389	0.999895
104	0.0814319	0.463149	0.663838	809513699	5045561	0.190486	0.00619422	0.0785431	3.60194e-05	0.0995773	0.000239066	0.120371	0.00088088	0.138604	0.00191894	1.00011
105	0.0810177	0.462123	0.660855	804496443	5017256	0.195504	0.00619786	0.0785615	2.27462e-05	0.0997164	0.000171774	0.120947	0.000711918	0.139979	0.00169825	0.999988
106	0.0806083	0.461108	0.657635	799512143	4984300	0.200488	0.00619555	0.0785727	1.3878e-05	0.0998134	0.000120627	0.121399	0.000561565	0.141169	0.00147941	0.999007
107	0.0802022	0.460098	0.654933	794547118	4965025	0.205453	0.00621007	0.0785792	8.16624e-06	0.0998798	8.29976e-05	0.121746	0.000433711	0.142185	0.00127117	1.00083
108	0.079801	0.459098	0.65185	789615672	4931446	0.210384	0.00620661	0.0785829	4.62393e-06	0.0999239	5.54871e-05	0.122005	0.000326095	0.143035	0.00106952	0.999828
109	0.0794042	0.458105	0.649052	784712395	4903277	0.215288	0.0062097	0.0785848	2.48388e-06	0.0999524	3.61094e-05	0.122194	0.000239663	0.143732	0.000883082	0.999948
110	0.0790118	0.457122	0.64605	779836949	4875446	0.220163	0.00621304	0.0785858	1.27367e-06	0.0999703	2.28018e-05	0.122329	0.000172194	0.144292	0.00071366	1.00016
111	0.0786236	0.456147	0.643279	774991544	4845405	0.225008	0.00621336	0.0785863	6.21336e-07	0.0999811	1.39179e-05	0.122424	0.000120974	0.144731	0.000563179	0.999941
112	0.0782404	0.45518	0.640386	770175176	4816368	0.229825	0.00621474	0.0785865	2.79663e-07	0.0999874	8.17238e-06	0.122488	8.30599e-05	0.145068	0.000434037	0.999929
113	0.0778594	0.454219	0.638076	765384971	4790205	0.234615	0.00621963	0.0785866	1.24393e-07	0.099991	4.63362e-06	0.122531	5.56035e-05	0.145319	0.000326779	1.00052
114	0.0774828	0.453267	0.635311	760629455	4755516	0.239371	0.00621323	0.0785867	3.10662e-08	0.0999929	2.48529e-06	0.122559	3.613e-05	0.145503	0.0002398	0.999318
115	0.0771101	0.452321	0.632833	755899645	4729810	0.2441	0.00621828	0.0785867	0	0.0999939	1.27475e-06	0.122576	2.28211e-05	0.145634	0.00017234	0.999985
116	0.0767405	0.451383	0.630377	751197520	4702125	0.248802	0.00622057	0.0785867	0	0.0999944	6.22057e-07	0.122587	1.39341e-05	0.145726	0.000121114	1.00023
117	0.0763747	0.450451	0.627844	746524890	4672630	0.253475	0.00622024	0.0785867	0	0.0999946	2.79911e-07	0.122593	8.17962e-06	0.145788	8.31335e-05	1.00007
118	0.0760132	0.449528	0.624971	741878877	4646013	0.258121	0.00622352	0.0785867	0	0.0999947	1.2447e-07	0.122596	4.63652e-06	0.14583	5.56383e-05	1.00051
119	0.0756552	0.448613	0.622583	737265590	4613287	0.262734	0.00621838	0.0785867	0	0.0999947	3.10919e-08	0.122598	2.48735e-06	0.145856	3.61599e-05	0.999605
120	0.0752993	0.447703	0.620418	732677459	4588131	0.267323	0.00622317	0.0785867	0	0.0999947	0	0.122599	1.27575e-06	0.145873	2.2839e-05	1.00031
