# Supplementary material for: Quantifying the Potential for Future Gene Therapy to Lower Lifetime Risk of Polygenic Late-Onset Diseases
Source: MDPI journal article supplement (doi:10.3390/ijms20133352), 2019-07-08
Supplement: s2 [file s2 › SuppFiles/Results/LODsRareMedium/LungCancer/EnvironmentArray.csv]

Age	Env	Incidence	CasesExpected
0	0	-4.91591e-06	0
1	0	-4.89989e-06	0
2	0	-4.88108e-06	0
3	0	-4.85903e-06	0
4	0	-4.83315e-06	0
5	0	-4.8028e-06	0
6	0	-4.76719e-06	0
7	0	-4.72542e-06	0
8	0	-4.67642e-06	0
9	0	-4.61893e-06	0
10	0	-4.5515e-06	0
11	0	-4.47239e-06	0
12	0	-4.3796e-06	0
13	0	-4.27074e-06	0
14	0	-4.14304e-06	0
15	0	-3.99324e-06	0
16	0	-3.81752e-06	0
17	0	-3.61139e-06	0
18	0	-3.3696e-06	0
19	0	-3.08598e-06	0
20	0	-2.75328e-06	0
21	0	-2.36304e-06	0
22	0	-1.90531e-06	0
23	0	-1.36843e-06	0
24	0	-7.38718e-07	0
25	0	-1.60354e-10	0
26	1.3793728e-06	8.66027e-07	21
27	2.9988454e-06	1.88185e-06	47
28	4.8799572e-06	3.07311e-06	76
29	7.0721674e-06	4.47001e-06	111
30	9.7204458e-06	6.10793e-06	152
31	1.2762865e-05	8.02829e-06	200
32	1.6329939e-05	1.02796e-05	256
33	2.0531082e-05	1.29185e-05	322
34	2.5469145e-05	1.60114e-05	400
35	3.1258974e-05	1.96358e-05	490
36	3.798126e-05	2.38823e-05	597
37	4.59098e-05	2.88564e-05	721
38	5.5134617e-05	3.46815e-05	866
39	6.6022987e-05	4.1501e-05	1037
40	7.8690431e-05	4.9482e-05	1236
41	9.3561606e-05	5.88183e-05	1470
42	0.00011098178	6.97349e-05	1742
43	0.00013129354	8.24921e-05	2061
44	0.000154997	9.73905e-05	2433
45	0.00018267193	0.000114776	2867
46	0.0002149441	0.000135046	3373
47	0.00025259556	0.000158654	3963
48	0.00029632089	0.000186117	4648
49	0.00034723473	0.000218018	5444
50	0.00040608326	0.000255015	6366
51	0.0004746583	0.00029784	7433
52	0.00055364123	0.000347301	8665
53	0.00064469296	0.000404282	10084
54	0.00074911653	0.000469735	11711
55	0.00086888225	0.000544666	13573
56	0.0010058067	0.000630119	15694
57	0.0011609662	0.000727143	18100
58	0.0013370831	0.000836758	20813
59	0.0015352252	0.000959904	23856
60	0.0017563636	0.00109738	27247
61	0.0020021934	0.00124977	30996
62	0.0022737628	0.00141738	35109
63	0.0025695882	0.00160016	39581
64	0.002889864	0.00179761	44394
65	0.0032348858	0.00200878	49520
66	0.0036009287	0.00223218	54916
67	0.003984408	0.00246583	60529
68	0.0043835949	0.0027073	66293
69	0.0047926748	0.00295379	72133
70	0.0052072584	0.00320225	77969
71	0.0056239532	0.00344953	83721
72	0.0060366747	0.00369254	89310
73	0.0064406153	0.00392841	94664
74	0.0068303227	0.00415459	99721
75	0.0072048136	0.004369	104432
76	0.0075607041	0.00457002	108760
77	0.0078941649	0.00475656	112682
78	0.0082063486	0.00492801	116189
79	0.0084962788	0.00508423	119282
80	0.0087610761	0.00522541	121971
81	0.0090061974	0.0053521	124276
82	0.0092288974	0.00546504	126219
83	0.0094320706	0.00556515	127829
84	0.0096159051	0.00565342	129134
85	0.009784202	0.0057309	130164
86	0.0099357637	0.00579864	130949
87	0.010073178	0.00585767	131515
88	0.010198159	0.00590894	131889
89	0.010313576	0.00595336	132095
90	0.010416289	0.00599175	132155
91	0.010512622	0.00602487	132089
92	0.010601058	0.00605339	131915
93	0.010681908	0.00607792	131648
94	0.010756549	0.00609899	131301
95	0.010826318	0.00611706	130887
96	0.010892656	0.00613255	130416
97	0.010951976	0.00614582	129897
98	0.01101006	0.00615717	129336
99	0.011064699	0.00616688	128743
100	0.011116517	0.00617519	128121
101	0.011166044	0.00618228	127477
102	0.011213902	0.00618834	126812
103	0.011259648	0.00619352	126133
104	0.011304353	0.00619794	125441
105	0.011347651	0.00620171	124740
106	0.011390423	0.00620493	124031
107	0.01143201	0.00620768	123316
108	0.01147253	0.00621002	122597
109	0.011511588	0.00621202	121875
110	0.011549594	0.00621372	121151
111	0.01158859	0.00621518	120427
112	0.011624797	0.00621642	119702
113	0.011662674	0.00621748	118978
114	0.011698951	0.00621838	118255
115	0.011735616	0.00621915	117534
116	0.011771179	0.0062198	116815
117	0.011807897	0.00622036	116100
118	0.011844057	0.00622084	115387
119	0.011880671	0.00622124	114677
