# Supplementary material for: Quantifying the Potential for Future Gene Therapy to Lower Lifetime Risk of Polygenic Late-Onset Diseases
Source: MDPI journal article supplement (doi:10.3390/ijms20133352), 2019-07-08
Supplement: s2 [file s2 › SuppFiles/Results/LODsRareMedium/LungCancer/EnvironmentArraySD.csv]

Age	Env	EnvSD	Incidence	CasesExpected
0	0	0	-4.91591e-06	0
1	0	0	-4.89989e-06	0
2	0	0	-4.88108e-06	0
3	0	0	-4.85903e-06	0
4	0	0	-4.83315e-06	0
5	0	0	-4.8028e-06	0
6	0	0	-4.76719e-06	0
7	0	0	-4.72542e-06	0
8	0	0	-4.67642e-06	0
9	0	0	-4.61893e-06	0
10	0	0	-4.5515e-06	0
11	0	0	-4.47239e-06	0
12	0	0	-4.3796e-06	0
13	0	0	-4.27074e-06	0
14	0	0	-4.14304e-06	0
15	0	0	-3.99324e-06	0
16	0	0	-3.81752e-06	0
17	0	0	-3.61139e-06	0
18	0	0	-3.3696e-06	0
19	0	0	-3.08598e-06	0
20	0	0	-2.75328e-06	0
21	0	0	-2.36304e-06	0
22	0	0	-1.90531e-06	0
23	0	0	-1.36843e-06	0
24	0	0	-7.38718e-07	0
25	0	0	-1.60354e-10	0
26	1.3793728e-06	1.334e-08	8.66027e-07	21
27	2.9988454e-06	2.082e-08	1.88185e-06	47
28	4.8799572e-06	3.268e-08	3.07311e-06	76
29	7.0721674e-06	3.2e-08	4.47001e-06	111
30	9.7204458e-06	3.924e-08	6.10793e-06	152
31	1.2762865e-05	4.204e-08	8.02829e-06	200
32	1.6329939e-05	5.208e-08	1.02796e-05	256
33	2.0531082e-05	5.738e-08	1.29185e-05	322
34	2.5469145e-05	7.254e-08	1.60114e-05	400
35	3.1258974e-05	6.159e-08	1.96358e-05	490
36	3.798126e-05	7.647e-08	2.38823e-05	597
37	4.59098e-05	7.001e-08	2.88564e-05	721
38	5.5134617e-05	9.125e-08	3.46815e-05	866
39	6.6022987e-05	9.592e-08	4.1501e-05	1037
40	7.8690431e-05	9.786e-08	4.9482e-05	1236
41	9.3561606e-05	9.986e-08	5.88183e-05	1470
42	0.00011098178	9.547e-08	6.97349e-05	1742
43	0.00013129354	1.008e-07	8.24921e-05	2061
44	0.000154997	1.528e-07	9.73905e-05	2433
45	0.00018267193	2.124e-07	0.000114776	2867
46	0.0002149441	2.182e-07	0.000135046	3373
47	0.00025259556	2.453e-07	0.000158654	3963
48	0.00029632089	2.474e-07	0.000186117	4648
49	0.00034723473	2.297e-07	0.000218018	5444
50	0.00040608326	2.596e-07	0.000255015	6366
51	0.0004746583	3.42e-07	0.00029784	7433
52	0.00055364123	2.793e-07	0.000347301	8665
53	0.00064469296	4.216e-07	0.000404282	10084
54	0.00074911653	4.726e-07	0.000469735	11711
55	0.00086888225	4.692e-07	0.000544666	13573
56	0.0010058067	4.885e-07	0.000630119	15694
57	0.0011609662	3.816e-07	0.000727143	18100
58	0.0013370831	5.346e-07	0.000836758	20813
59	0.0015352252	4.21e-07	0.000959904	23856
60	0.0017563636	4.317e-07	0.00109738	27247
61	0.0020021934	4.097e-07	0.00124977	30996
62	0.0022737628	6.815e-07	0.00141738	35109
63	0.0025695882	1.014e-06	0.00160016	39581
64	0.002889864	1.054e-06	0.00179761	44394
65	0.0032348858	7.088e-07	0.00200878	49520
66	0.0036009287	1.161e-06	0.00223218	54916
67	0.003984408	1.376e-06	0.00246583	60529
68	0.0043835949	1.065e-06	0.0027073	66293
69	0.0047926748	1.371e-06	0.00295379	72133
70	0.0052072584	2.001e-06	0.00320225	77969
71	0.0056239532	9.524e-07	0.00344953	83721
72	0.0060366747	1.488e-06	0.00369254	89310
73	0.0064406153	1.676e-06	0.00392841	94664
74	0.0068303227	1.125e-06	0.00415459	99721
75	0.0072048136	1.044e-06	0.004369	104432
76	0.0075607041	1.291e-06	0.00457002	108760
77	0.0078941649	8.664e-07	0.00475656	112682
78	0.0082063486	1.348e-06	0.00492801	116189
79	0.0084962788	1.362e-06	0.00508423	119282
80	0.0087610761	9.638e-07	0.00522541	121971
81	0.0090061974	1.891e-06	0.0053521	124276
82	0.0092288974	2.462e-06	0.00546504	126219
83	0.0094320706	8.42e-07	0.00556515	127829
84	0.0096159051	1.334e-06	0.00565342	129134
85	0.009784202	1.345e-06	0.0057309	130164
86	0.0099357637	1.24e-06	0.00579864	130949
87	0.010073178	1.822e-06	0.00585767	131515
88	0.010198159	1.717e-06	0.00590894	131889
89	0.010313576	3.595e-06	0.00595336	132095
90	0.010416289	1.259e-06	0.00599175	132155
91	0.010512622	2.931e-06	0.00602487	132089
92	0.010601058	3.061e-06	0.00605339	131915
93	0.010681908	3.419e-06	0.00607792	131648
94	0.010756549	2.646e-06	0.00609899	131301
95	0.010826318	2.246e-06	0.00611706	130887
96	0.010892656	1.731e-06	0.00613255	130416
97	0.010951976	2.763e-06	0.00614582	129897
98	0.01101006	2.406e-06	0.00615717	129336
99	0.011064699	2.02e-06	0.00616688	128743
100	0.011116517	1.737e-06	0.00617519	128121
101	0.011166044	1.565e-06	0.00618228	127477
102	0.011213902	1.41e-06	0.00618834	126812
103	0.011259648	1.959e-06	0.00619352	126133
104	0.011304353	1.951e-06	0.00619794	125441
105	0.011347651	9.631e-07	0.00620171	124740
106	0.011390423	2.12e-06	0.00620493	124031
107	0.01143201	1.437e-06	0.00620768	123316
108	0.01147253	1.884e-06	0.00621002	122597
109	0.011511588	1.549e-06	0.00621202	121875
110	0.011549594	1.836e-06	0.00621372	121151
111	0.01158859	1.778e-06	0.00621518	120427
112	0.011624797	1.874e-06	0.00621642	119702
113	0.011662674	1.691e-06	0.00621748	118978
114	0.011698951	2.016e-06	0.00621838	118255
115	0.011735616	1.437e-06	0.00621915	117534
116	0.011771179	2.583e-06	0.0062198	116815
117	0.011807897	1.642e-06	0.00622036	116100
118	0.011844057	1.5e-06	0.00622084	115387
119	0.011880671	1.813e-06	0.00622124	114677
