# Supplementary material for: Quantifying the Potential for Future Gene Therapy to Lower Lifetime Risk of Polygenic Late-Onset Diseases
Source: MDPI journal article supplement (doi:10.3390/ijms20133352), 2019-07-08
Supplement: s2 [file s2 › SuppFiles/Results/LODsRareMedium/LungCancer/FrailtyAnalysis.csv]

Age	Heritability	MeanOR	CaseOR	nControls	nCases	nCumIncidence	nIncidence	nLifeIncidence0	nAbsIncidence0	nLifeIncidence5	nAbsIncidence5	nLifeIncidence10	nAbsIncidence10	nLifeIncidence15	nAbsIncidence15
27	0.17374	0.99971	3.3102	9999993	7	7e-07	7e-07	6.8932e-07	6.8932e-07	6.9234e-07	6.9233e-07	6.9417e-07	6.9417e-07	6.9479e-07	6.9479e-07
28	0.17374	0.99971	2.5313	9999971	22	2.9e-06	2.2e-06	2.8537e-06	2.1644e-06	2.8666e-06	2.1742e-06	2.875e-06	2.1809e-06	2.8782e-06	2.1834e-06
29	0.17374	0.9997	2.2994	9999948	23	5.2e-06	2.3e-06	5.1142e-06	2.2605e-06	5.1377e-06	2.2711e-06	5.154e-06	2.279e-06	5.1606e-06	2.2824e-06
30	0.17374	0.9997	2.4212	9999909	39	9.1e-06	3.9e-06	8.9433e-06	3.8292e-06	8.9853e-06	3.8476e-06	9.0164e-06	3.8624e-06	9.0302e-06	3.8696e-06
31	0.17374	0.99969	2.5271	9999847	62	1.53e-05	6.2001e-06	1.5024e-05	6.081e-06	1.5096e-05	6.1112e-06	1.5153e-05	6.1364e-06	1.518e-05	6.1502e-06
32	0.17374	0.99969	2.4919	9999769	78	2.31e-05	7.8001e-06	2.2666e-05	7.6421e-06	2.2777e-05	7.6811e-06	2.2867e-05	7.7147e-06	2.2915e-05	7.7351e-06
33	0.17373	0.99968	2.9558	9999669	100	3.31e-05	1e-05	3.2453e-05	9.7867e-06	3.2615e-05	9.8382e-06	3.275e-05	9.8831e-06	3.2828e-05	9.9133e-06
34	0.17373	0.99967	2.2117	9999539	130	4.61e-05	1.3e-05	4.516e-05	1.2708e-05	4.5392e-05	1.2777e-05	4.5587e-05	1.2837e-05	4.571e-05	1.2882e-05
35	0.17373	0.99965	2.2869	9999354	185	6.46e-05	1.8501e-05	6.3222e-05	1.8063e-05	6.3556e-05	1.8165e-05	6.3838e-05	1.8252e-05	6.4031e-05	1.8322e-05
36	0.17372	0.99963	2.4706	9999154	200	8.46e-05	2.0001e-05	8.2724e-05	1.9503e-05	8.3172e-05	1.9617e-05	8.3552e-05	1.9715e-05	8.3826e-05	1.9796e-05
37	0.17371	0.99961	2.4991	9998890	264	0.000111	2.6402e-05	0.00010843	2.5711e-05	0.00010904	2.5867e-05	0.00010955	2.5999e-05	0.00010994	2.6113e-05
38	0.17371	0.99958	2.4583	9998612	278	0.0001388	2.7803e-05	0.00013547	2.7037e-05	0.00013624	2.7209e-05	0.0001369	2.7353e-05	0.00013741	2.7477e-05
39	0.1737	0.99955	2.5244	9998246	366	0.0001754	3.6605e-05	0.00017101	3.5545e-05	0.00017202	3.5782e-05	0.00017287	3.5977e-05	0.00017355	3.6146e-05
40	0.17369	0.99951	2.331	9997819	427	0.0002181	4.2707e-05	0.00021241	4.1406e-05	0.00021371	4.1696e-05	0.00021479	4.1932e-05	0.00021568	4.2134e-05
41	0.17368	0.99947	2.3742	9997324	495	0.0002676	4.9511e-05	0.00026032	4.7924e-05	0.00026198	4.8278e-05	0.00026334	4.856e-05	0.00026447	4.8801e-05
42	0.17366	0.99942	2.4635	9996753	571	0.0003247	5.7115e-05	0.00031549	5.519e-05	0.00031758	5.5619e-05	0.00031929	5.5958e-05	0.0003207	5.6244e-05
43	0.17365	0.99936	2.3401	9996041	712	0.0003959	7.1223e-05	0.00038417	6.8695e-05	0.00038682	6.9261e-05	0.00038897	6.9702e-05	0.00039074	7.0069e-05
44	0.17363	0.99929	2.3944	9995209	832	0.0004791	8.3233e-05	0.00046425	8.0119e-05	0.00046761	8.0822e-05	0.0004703	8.1361e-05	0.00047251	8.1804e-05
45	0.1736	0.9992	2.412	9994263	946	0.0005737	9.4645e-05	0.00055512	9.0909e-05	0.00055933	9.1762e-05	0.00056266	9.2405e-05	0.0005654	9.2926e-05
46	0.17357	0.9991	2.4817	9993103	1160	0.0006897	0.00011607	0.00066628	0.00011122	0.00067161	0.00011235	0.00067577	0.00011318	0.00067917	0.00011384
47	0.17354	0.99897	2.5189	9991765	1338	0.0008235	0.00013389	0.00079417	0.00012798	0.0008009	0.00012938	0.00080606	0.00013039	0.00081026	0.00013118
48	0.1735	0.99883	2.4665	9990206	1559	0.0009794	0.00015603	0.00094277	0.00014872	0.00095126	0.00015049	0.00095767	0.00015173	0.00096283	0.0001527
49	0.17346	0.99868	2.3418	9988376	1830	0.0011624	0.00018318	0.0011167	0.00017406	0.0011274	0.00017633	0.0011354	0.00017787	0.0011417	0.00017906
50	0.1734	0.99849	2.317	9986162	2214	0.0013838	0.00022166	0.0013263	0.00020992	0.0013401	0.00021291	0.00135	0.0002149	0.0013579	0.00021641
51	0.17334	0.99828	2.388	9983720	2442	0.001628	0.00024454	0.0015567	0.00023073	0.0015741	0.00023433	0.0015864	0.0002367	0.001596	0.00023845
52	0.17327	0.99802	2.3913	9980752	2968	0.0019248	0.00029728	0.0018356	0.00027935	0.0018578	0.00028415	0.0018732	0.00028726	0.001885	0.0002895
53	0.17319	0.99772	2.4221	9977362	3390	0.0022638	0.00033965	0.0021528	0.00031774	0.0021809	0.00032374	0.0022002	0.0003276	0.0022147	0.0003303
54	0.17309	0.99737	2.3731	9973311	4051	0.0026689	0.00040602	0.0025299	0.00037798	0.0025658	0.00038582	0.0025901	0.00039083	0.002608	0.00039426
55	0.17297	0.99695	2.427	9968670	4641	0.003133	0.00046534	0.0029596	0.0004309	0.0030054	0.0004407	0.0030359	0.00044697	0.003058	0.00045116
56	0.17284	0.99648	2.3642	9963197	5473	0.0036803	0.00054902	0.0034635	0.00050545	0.0035218	0.00051802	0.0035603	0.00052611	0.0035878	0.00053143
57	0.17268	0.99591	2.4261	9956751	6446	0.0043249	0.00064698	0.0040533	0.00059192	0.0041275	0.00060796	0.0041765	0.0006184	0.0042106	0.00062517
58	0.17251	0.99527	2.3613	9949381	7370	0.0050619	0.0007402	0.004723	0.00067261	0.0048169	0.00069245	0.0048789	0.00070553	0.0049215	0.00071392
59	0.17231	0.99455	2.3736	9941125	8256	0.0058875	0.0008298	0.0054677	0.00074852	0.0055855	0.00077249	0.0056635	0.00078851	0.0057162	0.00079876
60	0.17209	0.99373	2.3639	9931620	9505	0.006838	0.00095613	0.0063184	0.00085573	0.0064657	0.00088536	0.0065636	0.00090549	0.0066292	0.00091838
61	0.17183	0.99278	2.3594	9920718	10902	0.0079282	0.0010977	0.0072859	0.00097422	0.0074693	0.0010106	0.0075923	0.0010357	0.0076739	0.0010519
62	0.17154	0.9917	2.3242	9908025	12693	0.0091975	0.0012794	0.0084024	0.0011254	0.0086306	0.0011706	0.008785	0.0012023	0.0088871	0.0012229
63	0.17122	0.9905	2.3258	9893928	14097	0.010607	0.0014228	0.0096304	0.0012394	0.0099116	0.0012929	0.010104	0.001331	0.010231	0.0013561
64	0.17085	0.98915	2.3058	9878054	15874	0.012195	0.0016044	0.010999	0.0013832	0.011344	0.0014473	0.011582	0.0014936	0.011739	0.0015246
65	0.17045	0.98764	2.3065	9860213	17841	0.013979	0.0018061	0.01252	0.00154	0.01294	0.0016165	0.013234	0.0016724	0.013429	0.0017105
66	0.17	0.98597	2.2937	9840390	19823	0.015961	0.0020104	0.01419	0.0016939	0.0147	0.0017842	0.015059	0.0018509	0.015299	0.0018969
67	0.16952	0.98412	2.2773	9818459	21931	0.018154	0.0022287	0.016015	0.001854	0.016629	0.0019603	0.017065	0.002039	0.01736	0.0020942
68	0.16899	0.9821	2.2601	9794246	24213	0.020575	0.0024661	0.018001	0.0020233	0.018738	0.0021482	0.019265	0.0022409	0.019625	0.002307
69	0.16843	0.97993	2.2404	9767949	26297	0.023205	0.0026849	0.020127	0.0021701	0.021005	0.0023148	0.021637	0.0024219	0.022073	0.0024995
70	0.16782	0.97756	2.2247	9739245	28704	0.026076	0.0029386	0.022409	0.0023368	0.023452	0.0025055	0.024206	0.00263	0.024731	0.0027211
71	0.16716	0.97499	2.2083	9707904	31341	0.02921	0.003218	0.024858	0.002514	0.026093	0.0027114	0.026988	0.002856	0.027616	0.0029626
72	0.16648	0.97229	2.1716	9674350	33554	0.032565	0.0034564	0.027429	0.0026482	0.028884	0.0028752	0.029939	0.0030401	0.030686	0.0031622
73	0.16576	0.9694	2.166	9638541	35809	0.036146	0.0037014	0.030114	0.002776	0.031822	0.0030369	0.033058	0.0032244	0.03394	0.0033635
74	0.165	0.96636	2.1527	9600742	37799	0.039926	0.0039217	0.032883	0.002873	0.034877	0.0031697	0.036317	0.003381	0.03735	0.0035375
75	0.16422	0.96321	2.1166	9561011	39731	0.043899	0.0041383	0.03572	0.002955	0.038037	0.0032908	0.039705	0.0035285	0.040906	0.0037038
76	0.16342	0.95998	2.0863	9519552	41459	0.048045	0.0043363	0.038599	0.0030108	0.041276	0.0033876	0.043198	0.0036536	0.044585	0.0038484
77	0.16258	0.9566	2.0608	9475789	43763	0.052421	0.0045972	0.041546	0.0030952	0.044629	0.0035222	0.046839	0.0038242	0.048435	0.0040435
78	0.16174	0.95315	2.0425	9430962	44827	0.056904	0.0047307	0.044463	0.0030786	0.047991	0.0035479	0.050516	0.0038813	0.052339	0.0041209
79	0.16087	0.94959	2.0296	9384403	46559	0.06156	0.0049368	0.047381	0.0030942	0.051402	0.0036167	0.05428	0.0039902	0.056353	0.0042562
80	0.15999	0.94595	2.0082	9336536	47867	0.066346	0.0051007	0.050259	0.0030667	0.05482	0.0036422	0.058086	0.0040561	0.060435	0.004349
81	0.15912	0.94226	1.9909	9287773	48763	0.071223	0.0052228	0.053059	0.0029988	0.058205	0.0036264	0.061896	0.0040802	0.064543	0.0044006
82	0.15823	0.93856	1.9615	9238176	49597	0.076182	0.00534	0.055764	0.002913	0.061545	0.0035954	0.065696	0.0040914	0.068669	0.0044422
83	0.15735	0.93488	1.9358	9188283	49893	0.081172	0.0054007	0.058335	0.0027823	0.064792	0.0035147	0.069437	0.0040504	0.072763	0.0044311
84	0.15647	0.93111	1.9178	9136932	51351	0.086307	0.0055887	0.060817	0.0027014	0.06801	0.0035028	0.073199	0.0040943	0.076913	0.0045172
85	0.15559	0.92736	1.8947	9085349	51583	0.091465	0.0056455	0.063139	0.0025422	0.071111	0.0033943	0.076883	0.0040313	0.081015	0.0044894
86	0.15471	0.92357	1.8783	9032922	52427	0.096708	0.0057705	0.065321	0.0024016	0.074122	0.0033133	0.080523	0.0040067	0.085111	0.0045081
87	0.15384	0.91979	1.8647	8980519	52403	0.10195	0.0058013	0.067319	0.0022117	0.07698	0.0031646	0.084051	0.003906	0.089126	0.0044448
88	0.15298	0.91606	1.8325	8927831	52688	0.10722	0.0058669	0.069141	0.002028	0.079695	0.0030225	0.08748	0.003818	0.093077	0.0044
89	0.15211	0.91231	1.8239	8875022	52809	0.1125	0.0059151	0.070776	0.0018325	0.082247	0.0028592	0.09079	0.0037073	0.096946	0.0043334
90	0.15125	0.90857	1.8164	8822342	52680	0.11777	0.0059358	0.07222	0.0016264	0.084619	0.0026729	0.093957	0.0035688	0.10071	0.0042385
91	0.15041	0.90489	1.7859	8769696	52646	0.12303	0.0059673	0.073477	0.0014249	0.08681	0.0024836	0.09698	0.0034263	0.10436	0.0041434
92	0.14959	0.90124	1.7679	8717096	52600	0.12829	0.0059979	0.074554	0.0012277	0.088816	0.0022866	0.099849	0.0032718	0.1079	0.0040383
93	0.14877	0.8976	1.7516	8664305	52791	0.13357	0.006056	0.075463	0.0010436	0.090641	0.0020934	0.10257	0.0031199	0.11134	0.0039411
94	0.14796	0.89401	1.7307	8611740	52565	0.13883	0.0060668	0.076211	0.00086277	0.092269	0.0018795	0.10511	0.0029325	0.11463	0.0038025
95	0.14716	0.89045	1.7183	8559488	52252	0.14405	0.0060675	0.076811	0.00069695	0.093701	0.0016625	0.10746	0.0027322	0.11778	0.003648
96	0.14636	0.88685	1.7091	8506682	52806	0.14933	0.0061693	0.07729	0.00055918	0.094962	0.0014731	0.10966	0.0025676	0.12081	0.0035423
97	0.14556	0.88332	1.6918	8454532	52150	0.15455	0.0061305	0.077654	0.00042815	0.096029	0.0012549	0.11165	0.0023372	0.12365	0.0033441
98	0.1448	0.87987	1.6624	8402451	52081	0.15975	0.0061601	0.077928	0.00032365	0.096927	0.0010615	0.11345	0.0021294	0.12634	0.0031735
99	0.14405	0.87644	1.6491	8350612	51839	0.16494	0.0061695	0.078128	0.00023811	0.097664	0.00087737	0.11505	0.0019113	0.12884	0.0029822
100	0.1433	0.87309	1.6293	8299281	51331	0.17007	0.006147	0.07827	0.00017036	0.098253	0.00070607	0.11646	0.0016843	0.13115	0.002768
101	0.14256	0.86974	1.6203	8248041	51240	0.1752	0.006174	0.07837	0.00012021	0.098718	0.00055961	0.11768	0.0014743	0.13329	0.0025696
102	0.14185	0.86646	1.5995	8197149	50892	0.18029	0.0061702	0.078438	8.2465e-05	0.099073	0.00043093	0.11873	0.001263	0.13523	0.0023523
103	0.14114	0.86318	1.595	8146525	50624	0.18535	0.0061758	0.078483	5.5212e-05	0.099339	0.00032448	0.1196	0.0010642	0.13698	0.0021348
104	0.14042	0.85989	1.5878	8095867	50658	0.19041	0.0062184	0.078512	3.616e-05	0.099535	0.00024	0.12032	0.00088431	0.13855	0.0019264
105	0.13972	0.85665	1.5796	8045904	49963	0.19541	0.0061714	0.078531	2.2649e-05	0.099673	0.00017104	0.12089	0.00070888	0.13991	0.001691
106	0.13901	0.85341	1.5712	7995964	49940	0.2004	0.0062069	0.078542	1.3903e-05	0.09977	0.00012085	0.12135	0.00056259	0.14111	0.0014821
107	0.13833	0.85025	1.547	7946400	49564	0.20536	0.0061986	0.078549	8.1512e-06	0.099837	8.2845e-05	0.12169	0.00043291	0.14212	0.0012688
108	0.13765	0.8471	1.5338	7896724	49676	0.21033	0.0062514	0.078552	4.6573e-06	0.099881	5.5887e-05	0.12195	0.00032845	0.14298	0.0010772
109	0.13697	0.84397	1.5332	7847761	48963	0.21522	0.0062004	0.078554	2.4802e-06	0.09991	3.6055e-05	0.12214	0.00023931	0.14367	0.00088176
110	0.13631	0.84089	1.5151	7798957	48804	0.2201	0.0062188	0.078555	1.2749e-06	0.099928	2.2823e-05	0.12228	0.00017236	0.14423	0.00071433
111	0.13567	0.83786	1.5012	7750759	48198	0.22492	0.0061801	0.078556	6.1801e-07	0.099938	1.3843e-05	0.12237	0.00012033	0.14467	0.00056016
112	0.13501	0.83482	1.4982	7702580	48179	0.22974	0.006216	0.078556	2.7972e-07	0.099945	8.1741e-06	0.12244	8.3077e-05	0.14501	0.00043413
113	0.13438	0.83185	1.4778	7654775	47805	0.23452	0.0062064	0.078556	1.2413e-07	0.099948	4.6237e-06	0.12248	5.5485e-05	0.14526	0.00032608
114	0.13375	0.82891	1.4708	7607419	47356	0.23926	0.0061865	0.078556	3.0932e-08	0.09995	2.4746e-06	0.12251	3.5974e-05	0.14544	0.00023877
115	0.13311	0.82594	1.4685	7560057	47362	0.24399	0.0062258	0.078556	0	0.099951	1.2763e-06	0.12252	2.2849e-05	0.14557	0.00017255
116	0.13248	0.82299	1.4549	7512542	47515	0.24875	0.006285	0.078556	0	0.099952	6.285e-07	0.12253	1.4078e-05	0.14567	0.00012237
117	0.13187	0.82008	1.4452	7465597	46945	0.25344	0.0062489	0.078556	0	0.099952	2.812e-07	0.12254	8.2173e-06	0.14573	8.3516e-05
118	0.13126	0.81722	1.434	7419201	46396	0.25808	0.0062146	0.078556	0	0.099952	1.2429e-07	0.12254	4.6299e-06	0.14577	5.5559e-05
119	0.13068	0.81443	1.4099	7372914	46287	0.26271	0.0062388	0.078556	0	0.099952	3.1194e-08	0.12255	2.4955e-06	0.1458	3.6279e-05
120	0.1301	0.81167	1.3998	7326989	45925	0.2673	0.0062289	0.078556	0	0.099952	0	0.12255	1.2769e-06	0.14581	2.286e-05
