# Supplementary material for: Quantifying the Potential for Future Gene Therapy to Lower Lifetime Risk of Polygenic Late-Onset Diseases
Source: MDPI journal article supplement (doi:10.3390/ijms20133352), 2019-07-08
Supplement: s2 [file s2 › SuppFiles/Results/LODsRareMedium/ProstateCancer/-1.000/FrailtyAnalysis.csv]

Age	Heritability	MeanOR	CaseOR	nControls	nCases	nCumIncidence	nIncidence	nLifeIncidence0	nAbsIncidence0	nLifeIncidence5	nAbsIncidence5	nLifeIncidence10	nAbsIncidence10	nLifeIncidence15	nAbsIncidence15	nIncActDivExp
43	0.28006	0.443575	1	1000000000	0	0	0	0	0	0	0	0	0	0	0	0
44	0.28006	0.443575	0.813676	999999102	898	8.98e-07	8.98e-07	8.54959e-07	8.54959e-07	8.64199e-07	8.64199e-07	8.71698e-07	8.71698e-07	8.78253e-07	8.78253e-07	0.0590468
45	0.280061	0.443574	0.817688	999996994	2108	3.006e-06	2.108e-06	2.85667e-06	2.00172e-06	2.88893e-06	2.02474e-06	2.91464e-06	2.04295e-06	2.93697e-06	2.05872e-06	0.0611709
46	0.280061	0.443573	0.828759	999993283	3711	6.717e-06	3.71101e-06	6.37055e-06	3.51388e-06	6.44615e-06	3.55723e-06	6.50515e-06	3.59051e-06	6.55594e-06	3.61898e-06	0.0631041
47	0.280061	0.443572	0.815686	999987578	5705	1.2422e-05	5.70504e-06	1.17557e-05	5.38521e-06	1.19032e-05	5.45704e-06	1.20154e-05	5.51033e-06	1.21111e-05	5.55517e-06	0.0637075
48	0.280062	0.44357	0.808628	999979212	8366	2.0788e-05	8.3661e-06	1.96259e-05	7.87024e-06	1.98874e-05	7.98436e-06	2.00815e-05	8.06618e-06	2.02448e-05	8.13386e-06	0.0652098
49	0.280064	0.443566	0.817722	999967148	12064	3.2852e-05	1.20643e-05	3.09324e-05	1.13067e-05	3.13732e-05	1.1486e-05	3.16914e-05	1.16102e-05	3.19555e-05	1.17109e-05	0.0681568
50	0.280065	0.443562	0.817216	999950861	16287	4.9139e-05	1.62875e-05	4.6134e-05	1.52021e-05	4.6839e-05	1.54663e-05	4.73351e-05	1.56442e-05	4.77399e-05	1.57849e-05	0.0684159
51	0.280068	0.443556	0.820555	999928409	22452	7.1591e-05	2.24531e-05	6.69948e-05	2.08619e-05	6.80983e-05	2.12604e-05	6.88567e-05	2.15226e-05	6.94628e-05	2.17241e-05	0.0714355
52	0.280071	0.443548	0.818242	999898211	30198	0.000101789	3.02002e-05	9.49126e-05	2.79197e-05	9.66034e-05	2.85071e-05	9.7742e-05	2.88874e-05	9.86302e-05	2.91694e-05	0.0738255
53	0.280075	0.443537	0.817879	999857867	40344	0.000142133	4.03481e-05	0.000132006	3.70973e-05	0.000134556	3.79567e-05	0.000136245	3.8507e-05	0.000137528	3.89016e-05	0.0766842
54	0.280081	0.443522	0.81919	999804291	53576	0.000195709	5.35836e-05	0.00018097	4.89711e-05	0.000184768	5.02191e-05	0.000187253	5.10154e-05	0.000189087	5.15667e-05	0.0800017
55	0.280088	0.443503	0.818085	999733577	70714	0.000266423	7.07278e-05	0.000245173	6.42152e-05	0.00025077	6.60145e-05	0.000254402	6.71617e-05	0.000257008	6.79341e-05	0.0837616
56	0.280098	0.443478	0.817637	999640678	92899	0.000359322	9.29238e-05	0.000328914	8.37633e-05	0.000337085	8.63383e-05	0.000342366	8.79876e-05	0.000346057	8.9073e-05	0.0881287
57	0.280111	0.443445	0.817331	999520673	120005	0.000479327	0.000120048	0.000436245	0.00010737	0.000448029	0.000110983	0.000455644	0.000113318	0.000460846	0.00011483	0.092079
58	0.280127	0.443403	0.817655	999367407	153266	0.000632593	0.000153339	0.000572163	0.000135983	0.000588946	0.000140985	0.000599825	0.000144251	0.000607118	0.000146343	0.0961216
59	0.280148	0.443351	0.81633	999172018	195389	0.000827982	0.000195513	0.000743845	0.000171791	0.000767516	0.000178683	0.000782946	0.000183236	0.000793142	0.000186142	0.101301
60	0.280173	0.443284	0.81659	998926999	245019	0.001073	0.000245222	0.000957014	0.000213346	0.000989973	0.000222642	0.00101164	0.00022888	0.00102581	0.000232858	0.106313
61	0.280205	0.443201	0.818306	998622889	304110	0.00137711	0.000304437	0.0012188	0.000262062	0.0012641	0.000274425	0.00129419	0.000282861	0.00131376	0.000288265	0.111903
62	0.280245	0.4431	0.818678	998250599	372290	0.0017494	0.000372803	0.00153563	0.000317271	0.00159708	0.000333432	0.00163837	0.000344653	0.00166518	0.000351904	0.117821
63	0.280292	0.442977	0.818591	997801023	449576	0.00219898	0.000450364	0.00191357	0.000378598	0.00199577	0.000399387	0.00205173	0.000414078	0.00208811	0.000423671	0.124176
64	0.280349	0.442832	0.818116	997267346	533677	0.00273265	0.000534853	0.00235634	0.000443752	0.00246469	0.000469959	0.00253946	0.000488813	0.00258828	0.00050127	0.130585
65	0.280415	0.442662	0.817103	996643641	623705	0.00335636	0.000625414	0.00286661	0.000511664	0.00300732	0.000544116	0.00310574	0.000567826	0.00317042	0.000583736	0.137218
66	0.280491	0.442466	0.817846	995925269	718372	0.00407473	0.000720791	0.00344561	0.000580958	0.0036257	0.000620464	0.00375329	0.000649736	0.00383788	0.000669709	0.144152
67	0.280577	0.442243	0.817644	995107596	817673	0.0048924	0.000821018	0.00409423	0.000651265	0.00432158	0.00069872	0.00448461	0.000734311	0.00459381	0.000759023	0.151688
68	0.280674	0.441993	0.817771	994193178	914418	0.00580682	0.000918914	0.00480726	0.000716541	0.00509028	0.000772485	0.00529553	0.000814902	0.00543456	0.000844877	0.158784
69	0.280781	0.441716	0.817708	993182067	1011111	0.00681793	0.00101702	0.00558127	0.000778526	0.00592917	0.000843788	0.00618396	0.000893622	0.00635863	0.000929472	0.166182
70	0.280898	0.441414	0.81711	992076428	1105639	0.00792357	0.00111323	0.00641089	0.000835322	0.00683371	0.000910755	0.00714588	0.00096852	0.00736246	0.00101072	0.173689
71	0.281025	0.441085	0.817164	990878970	1197458	0.00912103	0.00120702	0.00729015	0.00088628	0.00779887	0.00097286	0.00817666	0.00103902	0.00844187	0.00108803	0.181324
72	0.281162	0.440732	0.816998	989591044	1287926	0.010409	0.00129978	0.00821372	0.000932073	0.0088205	0.00103104	0.00927274	0.00110617	0.00959378	0.00116251	0.189337
73	0.281307	0.440354	0.816795	988218094	1372950	0.0117819	0.00138739	0.00917311	0.000969481	0.00989109	0.00108185	0.0104269	0.00116631	0.0108113	0.00123035	0.19713
74	0.281462	0.439953	0.816353	986761578	1456516	0.0132384	0.00147388	0.0101625	0.00100121	0.011006	0.00112826	0.0116353	0.00122283	0.0120911	0.00129506	0.20527
75	0.281626	0.439529	0.815751	985222584	1538994	0.0147774	0.00155964	0.0111762	0.00102727	0.0121608	0.00117029	0.0128944	0.00127597	0.0134301	0.0013569	0.213763
76	0.281798	0.439081	0.815728	983602291	1620293	0.0163977	0.0016446	0.0122081	0.00104738	0.0133506	0.00120758	0.0142004	0.00132554	0.0148248	0.00141568	0.222546
77	0.281979	0.438611	0.815774	981905025	1697266	0.018095	0.00172556	0.0132498	0.0010591	0.0145677	0.0012374	0.0155467	0.00136878	0.0162693	0.00146852	0.231143
78	0.282168	0.438121	0.815001	980134085	1770940	0.0198659	0.00180358	0.0142934	0.00106285	0.0158052	0.0012603	0.0169276	0.00140637	0.017758	0.00151618	0.239654
79	0.282365	0.437608	0.814967	978288176	1845909	0.0217118	0.00188332	0.0153335	0.00106114	0.0170591	0.00127934	0.0183407	0.00144168	0.0192895	0.00156254	0.248658
80	0.28257	0.437075	0.814192	976371585	1916591	0.0236284	0.00195913	0.0163613	0.00105058	0.0183215	0.0012904	0.0197788	0.00147005	0.0208575	0.0016028	0.257365
81	0.282783	0.436519	0.814975	974381585	1990000	0.0256184	0.00203816	0.0173717	0.0010349	0.0195888	0.00129802	0.02124	0.00149656	0.0224614	0.00164276	0.266682
82	0.283003	0.435943	0.814036	972322612	2058973	0.0276774	0.00211311	0.0183558	0.00100996	0.0208526	0.00129696	0.0227165	0.00151531	0.0240947	0.0016762	0.27562
83	0.283231	0.435346	0.814069	970192951	2129661	0.029807	0.00219028	0.0193074	0.000978728	0.0221076	0.00129073	0.0242047	0.00153053	0.0257554	0.00170792	0.284979
84	0.283467	0.434729	0.813498	967995349	2197602	0.0320047	0.00226512	0.0202186	0.000939141	0.0233458	0.00127626	0.0256975	0.00153869	0.0274376	0.00173395	0.29414
85	0.283711	0.43409	0.813257	965726946	2268403	0.0342731	0.0023434	0.0210839	0.000893961	0.0245622	0.00125665	0.0271916	0.00154351	0.0291397	0.0017584	0.303838
86	0.283962	0.433431	0.812564	963392541	2334405	0.0366075	0.00241725	0.0218956	0.000840503	0.0257476	0.00122738	0.0286783	0.00153945	0.0308538	0.00177492	0.313034
87	0.284221	0.43275	0.812379	960987894	2404647	0.0390121	0.00249602	0.0226497	0.000782702	0.0268969	0.00119297	0.0301542	0.00153198	0.0325782	0.0017899	0.322926
88	0.284488	0.432046	0.812361	958511863	2476031	0.0414881	0.00257655	0.0233416	0.000719965	0.0280033	0.00115133	0.0316133	0.00151836	0.0343084	0.00180044	0.333094
89	0.284762	0.431323	0.811366	955969821	2542042	0.0440302	0.00265207	0.023966	0.000651481	0.0290572	0.00109958	0.0330456	0.00149428	0.0360352	0.00180155	0.342655
90	0.285045	0.430578	0.811483	953361567	2608254	0.0466384	0.00272839	0.0245208	0.000580328	0.0300522	0.00104082	0.0344443	0.0014631	0.0377532	0.00179708	0.352351
91	0.285334	0.429811	0.810923	950683778	2677789	0.0493162	0.00280879	0.0250057	0.000508587	0.0309833	0.000976643	0.035804	0.00142619	0.0394585	0.0017888	0.362602
92	0.285632	0.429022	0.810526	947937277	2746501	0.0520627	0.00288897	0.0254211	0.000437044	0.0318446	0.000905925	0.0371166	0.00138079	0.0411443	0.00177317	0.372847
93	0.285937	0.428212	0.809976	945129505	2807772	0.0548705	0.00296198	0.0257688	0.000366723	0.0326291	0.000827666	0.0383713	0.00132356	0.0427989	0.0017455	0.382182
94	0.28625	0.42738	0.809449	942251352	2878153	0.0577486	0.00304525	0.0260539	0.000301662	0.0333362	0.000748065	0.0395646	0.00126259	0.0444205	0.00171581	0.392856
95	0.286571	0.426525	0.809324	939305336	2946016	0.0606947	0.00312657	0.0262817	0.000241778	0.0339628	0.000665022	0.0406885	0.00119272	0.0460003	0.00167662	0.403291
96	0.2869	0.425649	0.808512	936295067	3010269	0.0637049	0.00320478	0.0264586	0.000188377	0.0345078	0.00058029	0.0417352	0.00111433	0.0475288	0.00162726	0.413334
97	0.287236	0.424751	0.808072	933220129	3074938	0.0667799	0.00328415	0.0265923	0.000142795	0.034973	0.000496827	0.0426994	0.00102985	0.0489985	0.00156966	0.423534
98	0.287579	0.42383	0.807759	930079387	3140742	0.0699206	0.00336549	0.0266907	0.00010534	0.0353619	0.000416681	0.043577	0.000940419	0.0504019	0.00150387	0.433994
99	0.287931	0.422887	0.807042	926874584	3204803	0.0731254	0.00344573	0.026761	7.55993e-05	0.0356793	0.000341334	0.0443643	0.000846444	0.0517307	0.00142863	0.444318
100	0.288289	0.421922	0.806881	923607834	3266750	0.0763922	0.00352448	0.02681	5.28672e-05	0.035932	0.000272548	0.0450591	0.000749657	0.0529769	0.00134452	0.454453
101	0.288656	0.420933	0.806079	920271397	3336437	0.0797286	0.0036124	0.0268434	3.61601e-05	0.0361281	0.000212337	0.0456632	0.000654096	0.054137	0.00125607	0.465774
102	0.289031	0.419921	0.805676	916872860	3398537	0.0831271	0.00369297	0.0268655	2.40782e-05	0.0362758	0.00016057	0.0461774	0.000558673	0.0552027	0.00115804	0.476151
103	0.289413	0.418888	0.804972	913413276	3459584	0.0865867	0.00377324	0.0268798	1.55835e-05	0.0363841	0.000118103	0.0466057	0.000467165	0.0561694	0.00105436	0.48649
104	0.289802	0.417831	0.8045	909890638	3522638	0.0901094	0.00385657	0.0268888	9.79568e-06	0.0364614	8.4613e-05	0.0469547	0.000382031	0.0570348	0.000947365	0.497225
105	0.290199	0.416749	0.804224	906304111	3586527	0.0936959	0.00394171	0.0268942	5.95199e-06	0.0365152	5.91257e-05	0.047232	0.000304813	0.0577976	0.000838402	0.508197
106	0.290604	0.415645	0.803187	902651965	3652146	0.097348	0.00402971	0.0268974	3.50585e-06	0.0365518	4.03374e-05	0.0474467	0.000236867	0.0584589	0.00072966	0.519537
107	0.291016	0.414516	0.80281	898939420	3712545	0.101061	0.00411293	0.0268991	1.97421e-06	0.036576	2.68163e-05	0.0476081	0.00017883	0.0590205	0.000622204	0.530262
108	0.291436	0.413365	0.802112	895167209	3772211	0.104833	0.00419629	0.0269001	1.09104e-06	0.0365916	1.73307e-05	0.0477262	0.000131344	0.0594876	0.000519543	0.541006
109	0.291863	0.412189	0.801415	891333220	3833989	0.108667	0.00428299	0.0269006	5.56788e-07	0.0366013	1.08788e-05	0.0478103	9.39687e-05	0.0598674	0.000424273	0.552181
110	0.292298	0.410988	0.801039	887435196	3898024	0.112565	0.00437325	0.0269008	2.62395e-07	0.0366072	6.60361e-06	0.0478688	6.55988e-05	0.0601688	0.000338184	0.563816
111	0.29274	0.409764	0.800357	883481402	3953794	0.116519	0.0044553	0.026901	1.33659e-07	0.0366106	3.87611e-06	0.0479083	4.45976e-05	0.0604012	0.000261883	0.574393
112	0.293189	0.408516	0.799725	879470226	4011176	0.12053	0.00454019	0.026901	4.54019e-08	0.0366126	2.17929e-06	0.0479345	2.96021e-05	0.0605756	0.000197408	0.585336
113	0.293646	0.407244	0.798847	875398245	4071981	0.124602	0.00463004	0.026901	4.63004e-08	0.0366136	1.20381e-06	0.0479513	1.91221e-05	0.0607031	0.00014492	0.596918
114	0.294109	0.405948	0.797939	871269645	4128600	0.12873	0.00471625	0.026901	0	0.0366141	6.13113e-07	0.0479618	1.19793e-05	0.0607937	0.000103475	0.608032
115	0.294581	0.404627	0.797366	867082969	4186676	0.132917	0.00480526	0.026901	0	0.0366144	2.88316e-07	0.0479681	7.25594e-06	0.0608565	7.20789e-05	0.619506
116	0.295059	0.40328	0.796994	862839850	4243119	0.13716	0.00489356	0.026901	0	0.0366145	1.46807e-07	0.0479718	4.25739e-06	0.0608989	4.89845e-05	0.630889
117	0.295544	0.40191	0.795963	858543372	4296478	0.141457	0.00497946	0.026901	0	0.0366146	4.97946e-08	0.0479739	2.39014e-06	0.0609269	3.24661e-05	0.641964
118	0.296036	0.400516	0.795045	854190910	4352462	0.145809	0.00506959	0.026901	0	0.0366146	5.06959e-08	0.047975	1.31809e-06	0.0609449	2.09374e-05	0.653583
119	0.296535	0.399097	0.79411	849785601	4405309	0.150214	0.00515729	0.026901	0	0.0366146	0	0.0479756	6.70448e-07	0.0609561	1.30995e-05	0.664889
120	0.297041	0.397654	0.793239	845326801	4458800	0.154673	0.00524697	0.026901	0	0.0366146	0	0.0479758	3.14818e-07	0.0609628	7.92293e-06	0.67645
