# Supplementary material for: Quantifying the Potential for Future Gene Therapy to Lower Lifetime Risk of Polygenic Late-Onset Diseases
Source: MDPI journal article supplement (doi:10.3390/ijms20133352), 2019-07-08
Supplement: s2 [file s2 › SuppFiles/Results/LODsRareMedium/ProstateCancer/-1.000/IndividualsByBetaDistrib.csv]

nEntry	Beta	nDetrimentalCount	nFractionPopulation	nCumulativeFractionPopulation	nEditsNeeded	nIndividuals
0	-19.8	0	0	1	0	0
1	-19.6	0	0	1	0	0
2	-19.4	0	0	1	0	0
3	-19.2	0	0	1	0	0
4	-19	0	0	1	0	0
5	-18.8	0	0	1	0	0
6	-18.6	0	0	1	0	0
7	-18.4	0	0	1	0	0
8	-18.2	0	0	1	0	0
9	-18	0	0	1	0	0
10	-17.8	0	0	1	0	0
11	-17.6	0	0	1	0	0
12	-17.4	0	0	1	0	0
13	-17.2	0	0	1	0	0
14	-17	0	0	1	0	0
15	-16.8	0	0	1	0	0
16	-16.6	0	0	1	0	0
17	-16.4	0	0	1	0	0
18	-16.2	0	0	1	0	0
19	-16	0	0	1	0	0
20	-15.8	0	0	1	0	0
21	-15.6	0	0	1	0	0
22	-15.4	0	0	1	0	0
23	-15.2	0	0	1	0	0
24	-15	0	0	1	0	0
25	-14.8	0	0	1	0	0
26	-14.6	0	0	1	0	0
27	-14.4	0	0	1	0	0
28	-14.2	0	0	1	0	0
29	-14	0	0	1	0	0
30	-13.8	0	0	1	0	0
31	-13.6	0	0	1	0	0
32	-13.4	0	0	1	0	0
33	-13.2	0	0	1	0	0
34	-13	0	0	1	0	0
35	-12.8	0	0	1	0	0
36	-12.6	0	0	1	0	0
37	-12.4	0	0	1	0	0
38	-12.2	0	0	1	0	0
39	-12	0	0	1	0	0
40	-11.8	0	0	1	0	0
41	-11.6	0	0	1	0	0
42	-11.4	0	0	1	0	0
43	-11.2	0	0	1	0	0
44	-11	0	0	1	0	0
45	-10.8	0	0	1	0	0
46	-10.6	0	0	1	0	0
47	-10.4	0	0	1	0	0
48	-10.2	0	0	1	0	0
49	-10	0	0	1	0	0
50	-9.8	0	0	1	0	0
51	-9.6	0	0	1	0	0
52	-9.4	0	0	1	0	0
53	-9.2	0	0	1	0	0
54	-9	0	0	1	0	0
55	-8.8	0	0	1	0	0
56	-8.6	0	0	1	0	0
57	-8.4	0	2.5e-08	1	0	25
58	-8.2	1	8.3e-08	0.99999998	0	83
59	-8	1.5106	2.35e-07	0.99999989	0	235
60	-7.8	1.6586	3.72e-07	0.99999966	0	372
61	-7.6	2.4204	1.513e-06	0.99999929	0	1513
62	-7.4	2.8849	4.189e-06	0.99999777	0	4189
63	-7.2	3.1577	5.474e-06	0.99999358	0	5474
64	-7	3.7896	1.4275e-05	0.99998811	0	14275
65	-6.8	4.071	2.2625e-05	0.99997383	0	22625
66	-6.6	4.5801	4.0732e-05	0.99995121	0	40732
67	-6.4	4.9898	8.6458e-05	0.99991048	0	86458
68	-6.2	5.3252	0.000119995	0.99982402	0	119995
69	-6	5.8636	0.000206734	0.99970402	0	206734
70	-5.8	6.1966	0.00033975	0.99949729	0	339750
71	-5.6	6.5903	0.000472397	0.99915754	0	472397
72	-5.4	7.0857	0.000732989	0.99868514	0	732989
73	-5.2	7.4174	0.001045157	0.99795215	0	1045157
74	-5	7.8326	0.001404119	0.996907	0	1404119
75	-4.8	8.2512	0.002013487	0.99550288	0	2013487
76	-4.6	8.5833	0.002703734	0.99348939	0	2703734
77	-4.4	9.0262	0.003521969	0.99078566	0	3521969
78	-4.2	9.4339	0.004639759	0.98726369	0	4639759
79	-4	9.7655	0.005854956	0.98262393	0	5854956
80	-3.8	10.204	0.007253793	0.97676897	0	7253793
81	-3.6	10.585	0.009053935	0.96951518	0	9053935
82	-3.4	10.948	0.010811706	0.96046124	0	10811706
83	-3.2	11.359	0.012890892	0.94964954	0	12890892
84	-3	11.751	0.015225183	0.93675865	0	15225183
85	-2.8	12.087	0.017287015	0.92153346	0	17287015
86	-2.6	12.504	0.020107035	0.90424645	0	20107035
87	-2.4	12.873	0.022746256	0.88413941	0	22746256
88	-2.2	13.248	0.025043961	0.86139316	0	25043961
89	-2	13.641	0.027619167	0.8363492	0	27619167
90	-1.8	14.011	0.030192965	0.80873003	0	30192965
91	-1.6	14.382	0.032222917	0.77853706	0	32222917
92	-1.4	14.781	0.033855033	0.74631415	0	33855033
93	-1.2	15.135	0.03590406	0.71245912	0	35904060
94	-1	15.512	0.03727188	0.67655506	0	37271880
95	-0.8	15.891	0.038214806	0.63928317	0	38214806
96	-0.6	16.259	0.038913538	0.60106837	0	38913538
97	-0.4	16.632	0.039048654	0.56215483	0	39048654
98	-0.2	17.01	0.039189414	0.52310618	0	39189414
99	0	17.371	0.038659957	0.48391676	0	38659957
100	0.2	17.746	0.03793363	0.44525681	0.37566	37933630
101	0.4	18.12	0.036746164	0.40732318	0.74896	36746164
102	0.6	18.488	0.035394229	0.37057701	1.1176	35394229
103	0.8	18.859	0.033656127	0.33518278	1.4882	33656127
104	1	19.23	0.03184746	0.30152666	1.8589	31847460
105	1.2	19.59	0.029761635	0.2696792	2.2194	29761635
106	1.4	19.959	0.027797173	0.23991756	2.5883	27797173
107	1.6	20.328	0.025685326	0.21212039	2.9572	25685326
108	1.8	20.693	0.023573827	0.18643506	3.3225	23573827
109	2	21.06	0.021358946	0.16286123	3.6894	21358946
110	2.2	21.427	0.019287104	0.14150229	4.0565	19287104
111	2.4	21.796	0.017195178	0.12221519	4.4249	17195178
112	2.6	22.159	0.015335248	0.10502001	4.788	15335248
113	2.8	22.521	0.013477655	0.089684759	5.1502	13477655
114	3	22.885	0.011863049	0.076207104	5.5145	11863049
115	3.2	23.252	0.01031728	0.064344055	5.8808	10317280
116	3.4	23.614	0.008926842	0.054026775	6.2433	8926842
117	3.6	23.98	0.007627394	0.045099933	6.6096	7627394
118	3.8	24.336	0.006526095	0.037472539	6.9655	6526095
119	4	24.705	0.005527551	0.030946444	7.3343	5527551
120	4.2	25.064	0.004655954	0.025418893	7.6933	4655954
121	4.4	25.426	0.003894042	0.020762939	8.0554	3894042
122	4.6	25.79	0.003237725	0.016868897	8.4191	3237725
123	4.8	26.157	0.002671021	0.013631172	8.7859	2671021
124	5	26.511	0.002198404	0.010960151	9.1399	2198404
125	5.2	26.874	0.001782178	0.008761747	9.5034	1782178
126	5.4	27.232	0.001455965	0.006979569	9.8617	1455965
127	5.6	27.597	0.00117723	0.005523604	10.227	1177230
128	5.8	27.953	0.000940551	0.004346374	10.582	940551
129	6	28.313	0.000751482	0.003405823	10.942	751482
130	6.2	28.674	0.000596567	0.002654341	11.303	596567
131	6.4	29.042	0.000468918	0.002057774	11.671	468918
132	6.6	29.39	0.000369323	0.001588856	12.02	369323
133	6.8	29.753	0.00028828	0.001219533	12.382	288280
134	7	30.114	0.000223907	0.000931253	12.744	223907
135	7.2	30.471	0.000171935	0.000707346	13.1	171935
136	7.4	30.835	0.000131945	0.000535411	13.465	131945
137	7.6	31.194	0.000100867	0.000403466	13.823	100867
138	7.8	31.547	7.6793e-05	0.000302599	14.177	76793
139	8	31.895	5.826e-05	0.000225806	14.524	58260
140	8.2	32.265	4.3601e-05	0.000167546	14.895	43601
141	8.4	32.606	3.2666e-05	0.000123945	15.235	32666
142	8.6	32.991	2.4464e-05	9.1279e-05	15.62	24464
143	8.8	33.34	1.8143e-05	6.6815e-05	15.97	18143
144	9	33.683	1.3286e-05	4.8672e-05	16.312	13286
145	9.2	34.054	9.707e-06	3.5386e-05	16.683	9707
146	9.4	34.396	7.271e-06	2.5679e-05	17.025	7271
147	9.6	34.731	5.178e-06	1.8408e-05	17.36	5178
148	9.8	35.132	3.768e-06	1.323e-05	17.762	3768
149	10	35.451	2.714e-06	9.462e-06	18.08	2714
150	10.2	35.875	1.98e-06	6.748e-06	18.505	1980
151	10.4	36.124	1.425e-06	4.768e-06	18.753	1425
152	10.6	36.49	9.77e-07	3.343e-06	19.12	977
153	10.8	36.865	6.87e-07	2.366e-06	19.494	687
154	11	37.264	5.03e-07	1.679e-06	19.894	503
155	11.2	37.442	3.51e-07	1.176e-06	20.071	351
156	11.4	37.856	2.64e-07	8.25e-07	20.485	264
157	11.6	38.226	1.77e-07	5.61e-07	20.855	177
158	11.8	38.786	1.26e-07	3.84e-07	21.415	126
159	12	38.871	9.3e-08	2.58e-07	21.5	93
160	12.2	39.679	5.3e-08	1.65e-07	22.309	53
161	12.4	40.27	3.7e-08	1.12e-07	22.9	37
162	12.6	39.808	2.6e-08	7.5e-08	22.437	26
163	12.8	41	2e-08	4.9e-08	23.629	20
164	13	40.625	8e-09	2.9e-08	23.254	8
165	13.2	40.286	7e-09	2.1e-08	22.915	7
166	13.4	42.75	4e-09	1.4e-08	25.379	4
167	13.6	42	3e-09	1e-08	24.629	3
168	13.8	40	2e-09	7e-09	22.629	2
169	14	41	1e-09	5e-09	23.629	1
170	14.2	41	1e-09	4e-09	23.629	1
171	14.4	44	1e-09	3e-09	26.629	1
172	14.6	45	1e-09	2e-09	27.629	1
173	14.8	0	0	1e-09	0	0
174	15	42	1e-09	1e-09	24.629	1
175	15.2	0	0	0	0	0
176	15.4	0	0	0	0	0
177	15.6	0	0	0	0	0
178	15.8	0	0	0	0	0
179	16	0	0	0	0	0
180	16.2	0	0	0	0	0
181	16.4	0	0	0	0	0
182	16.6	0	0	0	0	0
183	16.8	0	0	0	0	0
184	17	0	0	0	0	0
185	17.2	0	0	0	0	0
186	17.4	0	0	0	0	0
187	17.6	0	0	0	0	0
188	17.8	0	0	0	0	0
189	18	0	0	0	0	0
190	18.2	0	0	0	0	0
191	18.4	0	0	0	0	0
192	18.6	0	0	0	0	0
193	18.8	0	0	0	0	0
194	19	0	0	0	0	0
195	19.2	0	0	0	0	0
196	19.4	0	0	0	0	0
197	19.6	0	0	0	0	0
198	19.8	0	0	0	0	0
199	20	0	0	0	0	0
