# Supplementary material for: Quantifying the Potential for Future Gene Therapy to Lower Lifetime Risk of Polygenic Late-Onset Diseases
Source: MDPI journal article supplement (doi:10.3390/ijms20133352), 2019-07-08
Supplement: s2 [file s2 › SuppFiles/Results/LODsRareMedium/ProstateCancer/0.250/FrailtyAnalysis.csv]

Age	Heritability	MeanOR	CaseOR	nControls	nCases	nCumIncidence	nIncidence	nLifeIncidence0	nAbsIncidence0	nLifeIncidence5	nAbsIncidence5	nLifeIncidence10	nAbsIncidence10	nLifeIncidence15	nAbsIncidence15	nIncActDivExp
43	0.557741	0.250015	1	1000000000	0	0	0	0	0	0	0	0	0	0	0	0
44	0.557734	0.25001	47.5951	999996127	3873	3.873e-06	3.873e-06	3.68737e-06	3.68737e-06	3.72722e-06	3.72722e-06	3.75956e-06	3.75956e-06	3.78783e-06	3.78783e-06	0.254664
45	0.557719	0.249998	44.5489	999987318	8809	1.2682e-05	8.80903e-06	1.20522e-05	8.36485e-06	1.21883e-05	8.46104e-06	1.22967e-05	8.53715e-06	1.23909e-05	8.60305e-06	0.255624
46	0.557694	0.249978	40.9159	999971802	15516	2.8198e-05	1.55162e-05	2.6744e-05	1.46918e-05	2.70613e-05	1.4873e-05	2.73089e-05	1.50122e-05	2.75221e-05	1.51312e-05	0.263846
47	0.557655	0.249948	40.4164	999947976	23826	5.2024e-05	2.38267e-05	4.92343e-05	2.24903e-05	4.98516e-05	2.27903e-05	5.03217e-05	2.30128e-05	5.07222e-05	2.32001e-05	0.26607
48	0.5576	0.249905	38.7282	999913337	34639	8.6663e-05	3.46408e-05	8.18203e-05	3.25859e-05	8.291e-05	3.30584e-05	8.37189e-05	3.33972e-05	8.43996e-05	3.36774e-05	0.270009
49	0.557526	0.249845	35.7146	999864922	48415	0.000135078	4.84192e-05	0.000127195	4.5375e-05	0.000129004	4.60945e-05	0.000130312	4.65927e-05	0.000131397	4.69969e-05	0.273543
50	0.557427	0.249763	33.5952	999798707	66215	0.000201293	6.62239e-05	0.000188998	6.18024e-05	0.000191881	6.28764e-05	0.000193911	6.35995e-05	0.000195568	6.41716e-05	0.278174
51	0.557297	0.249655	31.8912	999709482	89225	0.000290518	8.9243e-05	0.000271899	8.29016e-05	0.000276366	8.44854e-05	0.000279439	8.55275e-05	0.000281896	8.63279e-05	0.28393
52	0.55713	0.249515	30.6889	999592418	117064	0.000407582	0.000117098	0.000380124	0.000108224	0.000386868	0.000110501	0.000391414	0.000111975	0.000394965	0.000113069	0.286251
53	0.556922	0.249335	28.0248	999439756	152662	0.000560244	0.000152724	0.000520486	0.000140362	0.000530481	0.000143614	0.00053711	0.000145696	0.000542154	0.000147189	0.290262
54	0.556659	0.249104	26.451	999241365	198391	0.000758635	0.000198502	0.000701799	0.000181314	0.000716415	0.000185934	0.000725992	0.000188882	0.000733077	0.000190924	0.296369
55	0.556333	0.248813	24.4717	998986815	254550	0.00101318	0.000254743	0.00093291	0.000231111	0.000954002	0.000237587	0.000967708	0.000241716	0.000977572	0.000244495	0.301687
56	0.555934	0.24845	22.7222	998663703	323112	0.0013363	0.00032344	0.00122417	0.00029126	0.00125422	0.000300213	0.00127366	0.000305948	0.00128729	0.000309722	0.306749
57	0.555449	0.248	21.1386	998256917	406786	0.00174308	0.00040733	0.001588	0.000363825	0.00163028	0.00037607	0.00165764	0.000383982	0.0016764	0.000389103	0.312429
58	0.554866	0.247451	19.6714	997750748	506169	0.00224925	0.000507053	0.00203687	0.000448876	0.00209567	0.000465387	0.00213381	0.000476168	0.00215947	0.000483073	0.317848
59	0.554174	0.246786	18.1379	997126209	624539	0.00287379	0.000625947	0.00258563	0.000548764	0.00266645	0.000570779	0.00271913	0.000585324	0.00275408	0.000594605	0.324321
60	0.553365	0.245994	16.7461	996366641	759568	0.00363336	0.000761757	0.00324647	0.000660832	0.00335608	0.000689627	0.00342808	0.00070895	0.00347535	0.000721271	0.33025
61	0.552429	0.245064	15.508	995456771	909870	0.00454323	0.000913188	0.00402969	0.000783225	0.00417625	0.000820175	0.00427347	0.000845388	0.00433688	0.000861538	0.335663
62	0.551366	0.24399	14.2868	994382112	1074659	0.00561789	0.00107956	0.00494427	0.000914578	0.00513742	0.000961164	0.00526698	0.000993511	0.0053513	0.00101441	0.341185
63	0.550168	0.242763	13.2786	993130092	1252020	0.00686991	0.00125909	0.00599678	0.00105251	0.00624772	0.0011103	0.00641812	0.00115114	0.00652911	0.00117781	0.347163
64	0.548838	0.241384	12.3106	991691290	1438802	0.00830871	0.00144875	0.00719051	0.00119373	0.00751195	0.00126423	0.00773307	0.00131495	0.00787757	0.00134846	0.353716
65	0.547383	0.239858	11.4521	990063714	1627576	0.00993629	0.00164121	0.00852206	0.00133155	0.00892796	0.00141601	0.00921078	0.00147771	0.00939668	0.00151911	0.360087
66	0.545821	0.238204	10.6356	988260649	1803065	0.0117394	0.00182116	0.00997533	0.00145327	0.0104801	0.0015521	0.0108361	0.00162532	0.011072	0.00167528	0.364215
67	0.544158	0.236429	9.92356	986282475	1978174	0.0137175	0.00200167	0.0115445	0.00156917	0.0121636	0.00168351	0.0126054	0.00176926	0.0129008	0.0018288	0.369822
68	0.54241	0.23455	9.26643	984142216	2140259	0.0158578	0.00217003	0.0132134	0.00166891	0.0139628	0.00179921	0.0145034	0.001898	0.0148686	0.00196782	0.374971
69	0.540592	0.232585	8.66932	981853501	2288715	0.0181465	0.00232559	0.0149654	0.00175201	0.0158616	0.00189888	0.0165144	0.00201103	0.0169603	0.0020917	0.380007
70	0.538718	0.23055	8.12924	979432339	2421162	0.0205677	0.00246591	0.0167822	0.00181674	0.0178424	0.0019808	0.0186208	0.00210644	0.0191585	0.00219822	0.384738
71	0.5368	0.22846	7.64385	976891224	2541115	0.0231088	0.00259448	0.018648	0.00186586	0.0198906	0.00204814	0.0208082	0.00218742	0.0214491	0.00229061	0.389754
72	0.534849	0.22633	7.19771	974245553	2645671	0.0257544	0.00270826	0.0205452	0.00189721	0.0219892	0.00209865	0.0230598	0.00225157	0.0238154	0.00236626	0.394506
73	0.532876	0.224171	6.78966	971508664	2736889	0.0284913	0.00280924	0.0224577	0.00191248	0.0241234	0.00213414	0.0253606	0.00230077	0.0262425	0.0024271	0.399156
74	0.530894	0.221999	6.40151	968694180	2814484	0.0313058	0.00289702	0.0243696	0.00191188	0.0262779	0.00215449	0.0276957	0.00233509	0.0287155	0.002473	0.403474
75	0.528911	0.219821	6.05594	965814454	2879726	0.0341855	0.00297279	0.0262664	0.00189676	0.0284387	0.00216083	0.0300516	0.00235596	0.0312209	0.00250539	0.407449
76	0.52693	0.217645	5.72821	962876365	2938089	0.0371236	0.00304208	0.0281375	0.00187115	0.0305961	0.00215735	0.0324197	0.0023681	0.03375	0.00252914	0.411654
77	0.524955	0.215476	5.44039	959889156	2987209	0.0401108	0.00310238	0.029971	0.00183346	0.0327382	0.00214213	0.0347893	0.00236957	0.0362922	0.00254223	0.415571
78	0.522988	0.213316	5.1723	956856323	3032833	0.0431437	0.00315957	0.0317582	0.00178725	0.0348575	0.00211928	0.0371542	0.00236491	0.0388418	0.00254955	0.419834
79	0.521038	0.211174	4.90773	953785924	3070399	0.0462141	0.00320884	0.0334882	0.00172999	0.0369432	0.00208572	0.0395046	0.00235039	0.0413892	0.00254742	0.423669
80	0.519104	0.20905	4.66922	950681984	3103940	0.049318	0.00325434	0.0351527	0.00166449	0.0389876	0.00204444	0.0418337	0.00232907	0.0439286	0.0025394	0.427513
81	0.517187	0.206946	4.44843	947547466	3134518	0.0524525	0.00329713	0.0367443	0.00159158	0.0409839	0.00199625	0.0441353	0.00230158	0.046455	0.00252642	0.431411
82	0.515291	0.204866	4.24933	944391060	3156406	0.0556089	0.00333113	0.0382529	0.0015086	0.0429212	0.00193731	0.0463987	0.00226346	0.0489588	0.00250379	0.434492
83	0.513415	0.20281	4.0569	941212027	3179033	0.058788	0.00336623	0.0396734	0.00142055	0.0447946	0.0018734	0.0486202	0.00222144	0.0514377	0.00247891	0.437981
84	0.51156	0.20078	3.88009	938014115	3197912	0.0619859	0.00339765	0.0409993	0.00132589	0.0465964	0.00180183	0.0507925	0.00217234	0.0538857	0.002448	0.441208
85	0.509722	0.198772	3.71551	934793864	3220251	0.0652061	0.00343305	0.0422278	0.00122846	0.0483233	0.00172686	0.0529136	0.00212105	0.0563021	0.00241635	0.445119
86	0.507904	0.196789	3.56267	931557528	3236336	0.0684425	0.00346209	0.0433531	0.00112531	0.0499666	0.00164328	0.0549747	0.00206109	0.0586784	0.00237634	0.448339
87	0.506107	0.194832	3.4193	928308231	3249297	0.0716918	0.00348803	0.044372	0.00101891	0.0515196	0.001553	0.056969	0.00199432	0.0610085	0.00233007	0.451268
88	0.504332	0.192902	3.28625	925049376	3258855	0.0749506	0.00351053	0.0452826	0.000910622	0.0529758	0.00145622	0.0588894	0.00192044	0.0632857	0.00227722	0.453839
89	0.502576	0.190997	3.15907	921776081	3273295	0.0782239	0.00353851	0.0460867	0.000804085	0.0543329	0.00135714	0.0607337	0.00184431	0.0655093	0.00222355	0.457185
90	0.500838	0.189116	3.04184	918492913	3283168	0.0815071	0.00356178	0.046785	0.00069833	0.0555854	0.00125246	0.0624943	0.0017606	0.0676718	0.00216249	0.459979
91	0.499122	0.187263	2.9268	915202326	3290587	0.0847977	0.00358259	0.0473809	0.000595827	0.0567296	0.00114417	0.0641651	0.00167083	0.0697674	0.00209564	0.462497
92	0.49742	0.18543	2.8293	911899083	3303243	0.0881009	0.0036093	0.0478806	0.000499715	0.0577654	0.00103583	0.0657439	0.00157878	0.0717948	0.00202743	0.465811
93	0.495739	0.183625	2.7293	908593437	3305646	0.0914066	0.00362501	0.0482899	0.000409272	0.0586891	0.000923697	0.0672211	0.00147713	0.0737429	0.00194802	0.467733
94	0.494075	0.181842	2.63175	905276336	3317101	0.0947237	0.00365081	0.0486184	0.000328592	0.0595039	0.000814846	0.0685964	0.0013753	0.0756118	0.00186899	0.470978
95	0.492429	0.180084	2.54487	901955093	3321243	0.0980449	0.00366876	0.0488753	0.000256832	0.0602104	0.000706428	0.0698634	0.00126699	0.0773929	0.00178102	0.473227
96	0.490799	0.178349	2.46296	898629472	3325621	0.101371	0.00368712	0.0490708	0.00019548	0.0608125	0.00060217	0.0710197	0.00115635	0.0790815	0.00168862	0.475544
97	0.489187	0.176637	2.38194	895298863	3330609	0.104701	0.00370632	0.0492156	0.000144815	0.0613164	0.000503855	0.0720641	0.00104441	0.0806733	0.00159186	0.477978
98	0.487589	0.174946	2.30618	891958072	3340791	0.108042	0.00373148	0.0493201	0.000104567	0.06173	0.000413623	0.0729976	0.000933517	0.0821662	0.00149283	0.48119
99	0.486005	0.173277	2.23763	888616877	3341195	0.111383	0.00374591	0.0493934	7.33058e-05	0.062061	0.000330979	0.0738184	0.000820765	0.0835515	0.00138529	0.483025
100	0.484441	0.171632	2.16334	885270759	3346118	0.114729	0.00376554	0.0494436	5.01918e-05	0.0623197	0.000258755	0.0745301	0.000711719	0.0848279	0.00127648	0.485535
101	0.48289	0.170007	2.10367	881924806	3345953	0.118075	0.00377958	0.0494771	3.3493e-05	0.0625164	0.000196675	0.075136	0.000605852	0.0859914	0.00116342	0.48733
102	0.481352	0.168404	2.04325	878575527	3349279	0.121424	0.00379769	0.049499	2.18373e-05	0.062662	0.000145627	0.0756426	0.000506679	0.0870416	0.00105027	0.489653
103	0.47983	0.16682	1.98067	875221668	3353859	0.124778	0.00381738	0.0495128	1.38514e-05	0.062767	0.000104976	0.0760579	0.000415241	0.0879788	0.000937169	0.492181
104	0.478323	0.16526	1.92566	871871193	3350475	0.128129	0.00382814	0.0495213	8.51021e-06	0.0628405	7.35094e-05	0.0763898	0.000331898	0.0888018	0.000823044	0.493561
105	0.476829	0.163718	1.87186	868517452	3353741	0.131483	0.0038466	0.0495264	5.06415e-06	0.0628908	5.03061e-05	0.0766491	0.000259345	0.0895152	0.000713341	0.495934
106	0.475352	0.162198	1.81832	865164505	3352947	0.134835	0.00386054	0.0495293	2.91706e-06	0.0629244	3.3563e-05	0.0768462	0.000197086	0.0901223	0.000607118	0.497727
107	0.473885	0.160696	1.77061	861811250	3353255	0.138189	0.00387586	0.0495309	1.60956e-06	0.0629463	2.18632e-05	0.076992	0.0001458	0.0906296	0.00050728	0.499698
108	0.472432	0.159214	1.72239	858457633	3353617	0.141542	0.00389136	0.0495318	8.7194e-07	0.0629601	1.38504e-05	0.077097	0.000104968	0.0910448	0.000415211	0.501693
109	0.470992	0.15775	1.67702	855102544	3355089	0.144897	0.00390828	0.0495322	4.36162e-07	0.0629686	8.52193e-06	0.0771706	7.36107e-05	0.0913772	0.000332355	0.503871
110	0.469563	0.156304	1.6384	851751412	3351132	0.148249	0.00391898	0.0495324	2.01068e-07	0.0629737	5.06021e-06	0.0772209	5.0267e-05	0.0916363	0.000259143	0.50525
111	0.468146	0.154875	1.59337	848396180	3355232	0.151604	0.00393922	0.0495325	1.00657e-07	0.0629766	2.91905e-06	0.0772545	3.35859e-05	0.0918335	0.000197221	0.507857
112	0.466742	0.153466	1.55202	845043339	3352841	0.154957	0.00395198	0.0495326	3.35284e-08	0.0629782	1.60936e-06	0.0772763	2.18605e-05	0.0919793	0.000145782	0.509501
113	0.465347	0.152073	1.51573	841692294	3351045	0.158308	0.00396553	0.0495326	3.35105e-08	0.0629791	8.71272e-07	0.0772902	1.38398e-05	0.0920842	0.000104888	0.511247
114	0.463967	0.150699	1.47843	838347082	3345212	0.161653	0.00397439	0.0495326	0	0.0629795	4.34878e-07	0.0772986	8.49684e-06	0.0921576	7.3394e-05	0.512389
115	0.462599	0.149342	1.44043	835001881	3345201	0.164998	0.00399023	0.0495326	0	0.0629797	2.00712e-07	0.0773037	5.05125e-06	0.0922078	5.0178e-05	0.514431
116	0.461239	0.148	1.40713	831654939	3346942	0.168345	0.0040083	0.0495326	0	0.0629798	1.00408e-07	0.0773066	2.91184e-06	0.0922413	3.35029e-05	0.51676
117	0.45989	0.146675	1.3775	828316723	3338216	0.171683	0.00401394	0.0495326	0	0.0629799	3.33822e-08	0.0773082	1.60234e-06	0.092263	2.17652e-05	0.517487
118	0.458555	0.145368	1.3422	824981298	3335425	0.175019	0.00402675	0.0495326	0	0.0629799	3.33543e-08	0.0773091	8.6721e-07	0.0922768	1.37753e-05	0.519138
119	0.457228	0.144076	1.3125	821646185	3335113	0.178354	0.00404265	0.0495326	0	0.0629799	0	0.0773095	4.33565e-07	0.0922853	8.47119e-06	0.521187
120	0.455909	0.142798	1.28387	818312479	3333706	0.181688	0.00405735	0.0495326	0	0.0629799	0	0.0773097	2.00022e-07	0.0922903	5.0339e-06	0.523082
