# Supplementary material for: Quantifying the Potential for Future Gene Therapy to Lower Lifetime Risk of Polygenic Late-Onset Diseases
Source: MDPI journal article supplement (doi:10.3390/ijms20133352), 2019-07-08
Supplement: s2 [file s2 › SuppFiles/Results/LODsRareMedium/ProstateCancer/0.250/IndividualsByBetaDistrib.csv]

nEntry	Beta	nDetrimentalCount	nFractionPopulation	nCumulativeFractionPopulation	nEditsNeeded	nIndividuals
0	-19.8	0	0	1	0	0
1	-19.6	0	0	1	0	0
2	-19.4	0	0	1	0	0
3	-19.2	0	0	1	0	0
4	-19	0	0	1	0	0
5	-18.8	0	0	1	0	0
6	-18.6	0	0	1	0	0
7	-18.4	0	0	1	0	0
8	-18.2	0	0	1	0	0
9	-18	0	0	1	0	0
10	-17.8	0	0	1	0	0
11	-17.6	0	0	1	0	0
12	-17.4	0	0	1	0	0
13	-17.2	0	0	1	0	0
14	-17	0	0	1	0	0
15	-16.8	0	0	1	0	0
16	-16.6	0	0	1	0	0
17	-16.4	0	0	1	0	0
18	-16.2	0	0	1	0	0
19	-16	0	0	1	0	0
20	-15.8	0	0	1	0	0
21	-15.6	0	0	1	0	0
22	-15.4	0	0	1	0	0
23	-15.2	0	0	1	0	0
24	-15	0	0	1	0	0
25	-14.8	0	0	1	0	0
26	-14.6	0	0	1	0	0
27	-14.4	0	0	1	0	0
28	-14.2	0	0	1	0	0
29	-14	0	0	1	0	0
30	-13.8	0	0	1	0	0
31	-13.6	0	0	1	0	0
32	-13.4	0	0	1	0	0
33	-13.2	0	0	1	0	0
34	-13	0	0	1	0	0
35	-12.8	0	0	1	0	0
36	-12.6	0	0	1	0	0
37	-12.4	0	0	1	0	0
38	-12.2	0	0	1	0	0
39	-12	0	0	1	0	0
40	-11.8	0	0	1	0	0
41	-11.6	0	0	1	0	0
42	-11.4	0	0	1	0	0
43	-11.2	0	0	1	0	0
44	-11	0	0	1	0	0
45	-10.8	0	0	1	0	0
46	-10.6	0	0	1	0	0
47	-10.4	0	0	1	0	0
48	-10.2	0	0	1	0	0
49	-10	0	0	1	0	0
50	-9.8	0	0	1	0	0
51	-9.6	0	0	1	0	0
52	-9.4	0	0	1	0	0
53	-9.2	0	0	1	0	0
54	-9	0	0	1	0	0
55	-8.8	0	0	1	0	0
56	-8.6	0	0	1	0	0
57	-8.4	0	1.3e-08	1	0	13
58	-8.2	1	5.9e-08	0.99999999	0	59
59	-8	1.5041	2.44e-07	0.99999993	0	244
60	-7.8	1.6333	3.9e-07	0.99999968	0	390
61	-7.6	2.3744	1.493e-06	0.99999929	0	1493
62	-7.4	2.8903	4.073e-06	0.9999978	0	4073
63	-7.2	3.1801	5.38e-06	0.99999373	0	5380
64	-7	3.793	1.4288e-05	0.99998835	0	14288
65	-6.8	4.066	2.2853e-05	0.99997406	0	22853
66	-6.6	4.5737	4.0893e-05	0.99995121	0	40893
67	-6.4	4.988	8.691e-05	0.99991031	0	86910
68	-6.2	5.3265	0.000119599	0.9998234	0	119599
69	-6	5.8625	0.000207585	0.99970381	0	207585
70	-5.8	6.1969	0.000337769	0.99949622	0	337769
71	-5.6	6.5869	0.000472277	0.99915845	0	472277
72	-5.4	7.0882	0.000731557	0.99868617	0	731557
73	-5.2	7.4189	0.001043755	0.99795462	0	1043755
74	-5	7.8328	0.00140464	0.99691086	0	1404640
75	-4.8	8.2512	0.002015202	0.99550622	0	2015202
76	-4.6	8.5823	0.002702543	0.99349102	0	2702543
77	-4.4	9.026	0.003521541	0.99078848	0	3521541
78	-4.2	9.4337	0.004641711	0.98726694	0	4641711
79	-4	9.7658	0.005854078	0.98262523	0	5854078
80	-3.8	10.204	0.007254966	0.97677115	0	7254966
81	-3.6	10.586	0.009053033	0.96951618	0	9053033
82	-3.4	10.948	0.010816012	0.96046315	0	10816012
83	-3.2	11.359	0.012893801	0.94964714	0	12893801
84	-3	11.751	0.015225122	0.93675334	0	15225122
85	-2.8	12.087	0.017284344	0.92152821	0	17284344
86	-2.6	12.505	0.020100715	0.90424387	0	20100715
87	-2.4	12.874	0.022752571	0.88414315	0	22752571
88	-2.2	13.248	0.025034124	0.86139058	0	25034124
89	-2	13.641	0.027624149	0.83635646	0	27624149
90	-1.8	14.01	0.030193785	0.80873231	0	30193785
91	-1.6	14.382	0.032212199	0.77853852	0	32212199
92	-1.4	14.781	0.033849086	0.74632633	0	33849086
93	-1.2	15.135	0.035903366	0.71247724	0	35903366
94	-1	15.513	0.037279301	0.67657387	0	37279301
95	-0.8	15.892	0.038214411	0.63929457	0	38214411
96	-0.6	16.259	0.038893519	0.60108016	0	38893519
97	-0.4	16.632	0.039052263	0.56218664	0	39052263
98	-0.2	17.01	0.03918789	0.52313438	0	39187890
99	0	17.371	0.038654387	0.48394649	0	38654387
100	0.2	17.746	0.037937368	0.4452921	0.37473	37937368
101	0.4	18.119	0.036742789	0.40735474	0.74839	36742789
102	0.6	18.488	0.035388398	0.37061195	1.1174	35388398
103	0.8	18.859	0.033664772	0.33522355	1.4881	33664772
104	1	19.229	0.031864005	0.30155878	1.8585	31864005
105	1.2	19.59	0.029760953	0.26969477	2.2194	29760953
106	1.4	19.958	0.027793029	0.23993382	2.5874	27793029
107	1.6	20.329	0.025689127	0.21214079	2.958	25689127
108	1.8	20.693	0.023564488	0.18645166	3.3224	23564488
109	2	21.06	0.021364383	0.16288717	3.6895	21364383
110	2.2	21.427	0.019292471	0.14152279	4.0564	19292471
111	2.4	21.795	0.017195423	0.12223032	4.4241	17195423
112	2.6	22.159	0.015342326	0.1050349	4.788	15342326
113	2.8	22.52	0.013477009	0.089692571	5.1494	13477009
114	3	22.886	0.01185678	0.076215562	5.5146	11856780
115	3.2	23.252	0.010320595	0.064358782	5.8812	10320595
116	3.4	23.614	0.008929581	0.054038187	6.2432	8929581
117	3.6	23.982	0.007630118	0.045108606	6.6108	7630118
118	3.8	24.336	0.006529154	0.037478488	6.965	6529154
119	4	24.705	0.005527754	0.030949334	7.334	5527754
120	4.2	25.063	0.004655273	0.02542158	7.6924	4655273
121	4.4	25.428	0.003891479	0.020766307	8.0569	3891479
122	4.6	25.791	0.003239514	0.016874828	8.4198	3239514
123	4.8	26.157	0.002670814	0.013635314	8.7861	2670814
124	5	26.51	0.002198593	0.0109645	9.1387	2198593
125	5.2	26.874	0.00178654	0.008765907	9.5034	1786540
126	5.4	27.229	0.001453404	0.006979367	9.8586	1453404
127	5.6	27.597	0.0011768	0.005525963	10.226	1176800
128	5.8	27.954	0.000941208	0.004349163	10.583	941208
129	6	28.317	0.000753661	0.003407955	10.946	753661
130	6.2	28.674	0.000596084	0.002654294	11.303	596084
131	6.4	29.034	0.000468373	0.00205821	11.663	468373
132	6.6	29.392	0.000368714	0.001589837	12.021	368714
133	6.8	29.754	0.000288765	0.001221123	12.383	288765
134	7	30.117	0.000223941	0.000932358	12.746	223941
135	7.2	30.476	0.000172239	0.000708417	13.105	172239
136	7.4	30.832	0.000132573	0.000536178	13.461	132573
137	7.6	31.191	0.000101254	0.000403605	13.82	101254
138	7.8	31.538	7.6865e-05	0.000302351	14.167	76865
139	8	31.9	5.7869e-05	0.000225486	14.529	57869
140	8.2	32.244	4.3672e-05	0.000167617	14.873	43672
141	8.4	32.624	3.2884e-05	0.000123945	15.253	32884
142	8.6	32.977	2.4471e-05	9.1061e-05	15.606	24471
143	8.8	33.341	1.801e-05	6.659e-05	15.97	18010
144	9	33.68	1.3375e-05	4.858e-05	16.309	13375
145	9.2	34.072	9.683e-06	3.5205e-05	16.701	9683
146	9.4	34.384	7.036e-06	2.5522e-05	17.013	7036
147	9.6	34.778	5.236e-06	1.8486e-05	17.407	5236
148	9.8	35.133	3.775e-06	1.325e-05	17.762	3775
149	10	35.459	2.775e-06	9.475e-06	18.089	2775
150	10.2	35.772	1.954e-06	6.7e-06	18.401	1954
151	10.4	36.16	1.41e-06	4.746e-06	18.789	1410
152	10.6	36.516	1.032e-06	3.336e-06	19.145	1032
153	10.8	36.852	7.28e-07	2.304e-06	19.481	728
154	11	37.199	4.93e-07	1.576e-06	19.828	493
155	11.2	37.616	3.44e-07	1.083e-06	20.245	344
156	11.4	38.131	2.21e-07	7.39e-07	20.76	221
157	11.6	38.424	1.7e-07	5.18e-07	21.053	170
158	11.8	38.934	1.06e-07	3.48e-07	21.563	106
159	12	39.07	7.1e-08	2.42e-07	21.699	71
160	12.2	39.702	5.7e-08	1.71e-07	22.331	57
161	12.4	39.658	3.8e-08	1.14e-07	22.287	38
162	12.6	40.545	2.2e-08	7.6e-08	23.175	22
163	12.8	40.684	1.9e-08	5.4e-08	23.313	19
164	13	41.083	1.2e-08	3.5e-08	23.712	12
165	13.2	40	4e-09	2.3e-08	22.629	4
166	13.4	42.667	3e-09	1.9e-08	25.296	3
167	13.6	42.714	7e-09	1.6e-08	25.343	7
168	13.8	41	1e-09	9e-09	23.629	1
169	14	42.5	2e-09	8e-09	25.129	2
170	14.2	42.5	2e-09	6e-09	25.129	2
171	14.4	0	0	4e-09	0	0
172	14.6	44.5	2e-09	4e-09	27.129	2
173	14.8	44	1e-09	2e-09	26.629	1
174	15	45	1e-09	1e-09	27.629	1
175	15.2	0	0	0	0	0
176	15.4	0	0	0	0	0
177	15.6	0	0	0	0	0
178	15.8	0	0	0	0	0
179	16	0	0	0	0	0
180	16.2	0	0	0	0	0
181	16.4	0	0	0	0	0
182	16.6	0	0	0	0	0
183	16.8	0	0	0	0	0
184	17	0	0	0	0	0
185	17.2	0	0	0	0	0
186	17.4	0	0	0	0	0
187	17.6	0	0	0	0	0
188	17.8	0	0	0	0	0
189	18	0	0	0	0	0
190	18.2	0	0	0	0	0
191	18.4	0	0	0	0	0
192	18.6	0	0	0	0	0
193	18.8	0	0	0	0	0
194	19	0	0	0	0	0
195	19.2	0	0	0	0	0
196	19.4	0	0	0	0	0
197	19.6	0	0	0	0	0
198	19.8	0	0	0	0	0
199	20	0	0	0	0	0
