# Supplementary material for: Quantifying the Potential for Future Gene Therapy to Lower Lifetime Risk of Polygenic Late-Onset Diseases
Source: MDPI journal article supplement (doi:10.3390/ijms20133352), 2019-07-08
Supplement: s2 [file s2 › SuppFiles/Results/LODsRareMedium/ProstateCancer/1.000/FrailtyAnalysis.csv]

Age	Heritability	MeanOR	CaseOR	nControls	nCases	nCumIncidence	nIncidence	nLifeIncidence0	nAbsIncidence0	nLifeIncidence5	nAbsIncidence5	nLifeIncidence10	nAbsIncidence10	nLifeIncidence15	nAbsIncidence15	nIncActDivExp
43	0.557722	1.00001	1	1000000000	0	0	0	0	0	0	0	0	0	0	0	0
44	0.557696	0.999929	170.035	999984643	15357	1.5357e-05	1.5357e-05	1.46209e-05	1.46209e-05	1.4779e-05	1.4779e-05	1.49072e-05	1.49072e-05	1.50193e-05	1.50193e-05	1.00978
45	0.557641	0.999756	152.473	999950145	34498	4.9855e-05	3.44985e-05	4.73795e-05	3.27591e-05	4.79143e-05	3.31358e-05	4.83406e-05	3.34339e-05	4.87107e-05	3.3692e-05	1.00109
46	0.557551	0.999463	141.201	999891088	59057	0.000108912	5.90599e-05	0.000103299	5.59227e-05	0.000104524	5.66125e-05	0.00010548	5.71423e-05	0.000106303	5.75953e-05	1.00429
47	0.557421	0.99903	128.66	999801769	89319	0.000198231	8.93287e-05	0.000187611	8.4321e-05	0.00018996	8.54456e-05	0.000191751	8.62799e-05	0.000193276	8.69821e-05	0.997523
48	0.557241	0.998416	117.556	999672994	128775	0.000327006	0.000128801	0.000308754	0.000121167	0.000312859	0.000122923	0.000315909	0.000124183	0.000318476	0.000125225	1.00394
49	0.557004	0.99759	108.319	999496374	176620	0.000503626	0.000176678	0.000474284	0.000165584	0.000481014	0.00016821	0.000485881	0.000170028	0.000489923	0.000171503	0.998138
50	0.556698	0.996497	99.0515	999258131	238243	0.000741869	0.000238363	0.00069665	0.000222479	0.000707245	0.000226345	0.000714713	0.000228948	0.000720814	0.000231007	1.00125
51	0.556313	0.995089	90.0086	998944479	313652	0.00105552	0.000313885	0.000988074	0.00029164	0.00100424	0.000297211	0.00101537	0.000300877	0.00102428	0.000303693	0.998639
52	0.555832	0.993291	82.9632	998536219	408260	0.00146378	0.000408691	0.00136551	0.000377831	0.00138961	0.00038578	0.00140588	0.000390926	0.00141861	0.000394743	0.999063
53	0.555242	0.991032	75.2751	998011331	524888	0.00198867	0.000525657	0.0018481	0.000483305	0.00188339	0.000494502	0.00190682	0.000501672	0.00192468	0.000506813	0.999046
54	0.554526	0.988227	68.6141	997344201	667130	0.0026558	0.000668459	0.00245781	0.000610918	0.00250863	0.000626487	0.00254197	0.00063642	0.0025667	0.000643299	0.998027
55	0.553664	0.984778	62.5336	996504056	840145	0.00349594	0.000842382	0.00322059	0.000764816	0.00329278	0.000786246	0.00333976	0.000799909	0.00337366	0.000809108	0.997617
56	0.552639	0.980578	56.6043	995453996	1050060	0.004546	0.00105374	0.00416714	0.000949866	0.00426843	0.000979065	0.00433404	0.000997769	0.0043802	0.00101008	0.999368
57	0.551434	0.975535	51.3371	994158724	1295272	0.00584128	0.00130119	0.00532562	0.00116377	0.00546589	0.00120293	0.0055567	0.00122824	0.00561917	0.00124462	0.998033
58	0.550025	0.96952	46.6284	992571210	1587514	0.00742879	0.00159684	0.00673344	0.0014161	0.0069255	0.00146818	0.00705012	0.0015022	0.00713424	0.00152398	1.00099
59	0.548403	0.962468	42.2379	990655071	1916139	0.00934493	0.00193048	0.00841709	0.00169625	0.0086767	0.0017643	0.00884594	0.00180927	0.00895854	0.00183795	1.00024
60	0.546556	0.954303	38.2886	988369146	2285925	0.0116309	0.00230749	0.0104059	0.00200754	0.0107521	0.00209501	0.0109795	0.00215372	0.0111292	0.00219114	1.00038
61	0.544478	0.94498	34.7362	985676886	2692260	0.0143231	0.00272394	0.0127234	0.0023448	0.013179	0.00245542	0.013481	0.0025309	0.0136785	0.00257925	1.00125
62	0.54217	0.934506	31.5678	982555877	3121009	0.0174441	0.00316636	0.0153795	0.0026947	0.0159704	0.00283196	0.0163663	0.00292727	0.0166245	0.00298885	1.0007
63	0.539643	0.922928	28.7099	978992252	3563625	0.0210077	0.00362689	0.0183753	0.00304895	0.0191307	0.00321636	0.0196428	0.00333467	0.0199769	0.00341193	1.00002
64	0.536906	0.910309	26.2387	974982590	4009662	0.0250174	0.0040957	0.021702	0.00339808	0.0226538	0.00359877	0.0233073	0.00374315	0.0237348	0.00383853	0.999972
65	0.533975	0.896757	24.0296	970535362	4447228	0.0294646	0.00456134	0.0253403	0.00373172	0.026523	0.00396841	0.0273451	0.00414133	0.0278857	0.00425737	1.00077
66	0.530879	0.882436	22.0384	965679587	4855775	0.0343204	0.00500319	0.0292541	0.00403257	0.0307029	0.0043068	0.0317222	0.00450998	0.0323973	0.00464862	1.00059
67	0.527647	0.867504	20.2693	960449803	5229784	0.0395502	0.00541565	0.0334025	0.00429591	0.0351536	0.00460894	0.0363996	0.0048437	0.0372322	0.00500672	1.00058
68	0.524303	0.852121	18.7152	954887520	5562283	0.0451125	0.00579133	0.0377399	0.00451591	0.0398295	0.00486848	0.0413323	0.00513581	0.0423463	0.00532472	1.00072
69	0.520879	0.836456	17.2879	949037330	5850190	0.0509627	0.00612657	0.0422182	0.00468989	0.0446833	0.00508304	0.0464727	0.00538324	0.0476929	0.0055992	1.00109
70	0.517405	0.820667	16.0075	942949636	6087694	0.0570504	0.0064146	0.0467861	0.00481326	0.0496637	0.00524791	0.0517691	0.00558077	0.0532201	0.00582394	1.00082
71	0.513899	0.804875	14.871	936667229	6282407	0.0633328	0.00666251	0.0513991	0.00489208	0.0547274	0.00536998	0.057177	0.00573515	0.0588832	0.00600572	1.00087
72	0.510385	0.789184	13.8349	930228531	6438698	0.0697715	0.00687405	0.0560163	0.00492938	0.0598348	0.00545277	0.0626566	0.00585009	0.0646419	0.00614808	1.00133
73	0.506888	0.773709	12.8864	923678825	6549706	0.0763212	0.00704096	0.0605931	0.00492009	0.064942	0.00549033	0.0681626	0.00591899	0.0704502	0.006244	1.00043
74	0.503415	0.758484	12.0408	917039423	6639402	0.0829606	0.007188	0.0651033	0.00488281	0.0700245	0.00550241	0.0736711	0.00596367	0.0762841	0.00631588	1.00109
75	0.49998	0.743576	11.271	910343169	6696254	0.0896568	0.00730204	0.0695138	0.00480956	0.0750491	0.00547916	0.0791495	0.00597394	0.0821099	0.00635284	1.00081
76	0.496593	0.729011	10.5614	903606293	6736876	0.0963937	0.00740037	0.0738043	0.004713	0.0799958	0.00543387	0.0845794	0.0059647	0.087909	0.00637031	1.00142
77	0.49326	0.714816	9.91572	896850111	6756182	0.10315	0.00747691	0.077951	0.0045891	0.0848407	0.00536169	0.0899387	0.00593098	0.0936588	0.00636315	1.00155
78	0.489988	0.701011	9.32704	890092489	6757622	0.109908	0.00753484	0.0819333	0.00444028	0.0895627	0.0052652	0.0952081	0.00587544	0.0993396	0.00633416	1.00121
79	0.486783	0.687608	8.77853	883345860	6746629	0.116654	0.00757969	0.0857346	0.0042707	0.0941457	0.00514889	0.100373	0.00580226	0.104937	0.00628865	1.00076
80	0.48364	0.674585	8.28979	876612758	6733102	0.123387	0.00762227	0.0893452	0.00408744	0.0985806	0.00502049	0.105425	0.00571945	0.110446	0.00623593	1.00132
81	0.480563	0.661947	7.84021	869905810	6706948	0.130094	0.00765098	0.0927507	0.00388486	0.102852	0.0048726	0.11035	0.00561789	0.115851	0.00616669	1.00109
82	0.47755	0.649685	7.42424	863228836	6676974	0.136771	0.00767551	0.095942	0.00366851	0.10695	0.004711	0.115138	0.00550411	0.121148	0.00608852	1.00115
83	0.474604	0.637796	7.03888	856588944	6639892	0.143411	0.00769193	0.098909	0.00343714	0.110863	0.00453285	0.119777	0.00537496	0.126325	0.00599793	1.0008
84	0.47172	0.626264	6.68722	849989184	6599760	0.150011	0.0077047	0.101645	0.00319445	0.114582	0.00434114	0.124261	0.0052338	0.131378	0.00589795	1.00051
85	0.468897	0.615067	6.36323	843426009	6563175	0.156574	0.00772148	0.104149	0.00294559	0.118101	0.00414064	0.128584	0.00508583	0.136302	0.00579389	1.00114
86	0.466133	0.604202	6.0574	836904999	6521010	0.163095	0.00773157	0.106416	0.00268835	0.121412	0.00392578	0.132737	0.00492393	0.14109	0.00567706	1.00124
87	0.463429	0.593658	5.78057	830431571	6473428	0.169568	0.00773496	0.108446	0.00242553	0.124506	0.00369692	0.13671	0.00474749	0.145733	0.00554674	1.00072
88	0.460778	0.583417	5.52537	824003950	6427621	0.175996	0.0077401	0.110243	0.00216282	0.127378	0.00345866	0.140498	0.00456124	0.150224	0.00540863	1.00063
89	0.45818	0.573467	5.28556	817621841	6382109	0.182378	0.00774524	0.11181	0.00190262	0.130024	0.00321125	0.144093	0.00436398	0.154559	0.00526134	1.00071
90	0.455635	0.563799	5.0618	811288017	6333824	0.188712	0.00774664	0.113157	0.00164771	0.132441	0.00295519	0.14749	0.00415414	0.158731	0.0051024	1.00042
91	0.453143	0.554407	4.8481	805003064	6284953	0.194997	0.00774688	0.114295	0.00140273	0.134626	0.00269367	0.150681	0.00393356	0.162734	0.00493368	1.00009
92	0.450696	0.545268	4.65077	798760560	6242504	0.201239	0.00775463	0.11524	0.00117312	0.136583	0.0024317	0.153665	0.00370633	0.166565	0.00475956	1.0008
93	0.448296	0.536381	4.46992	792569790	6190770	0.20743	0.00775047	0.116006	0.000959586	0.138313	0.00216571	0.156431	0.0034633	0.170214	0.00456735	1.00004
94	0.445938	0.527721	4.29897	786419961	6149829	0.21358	0.00775935	0.116616	0.000768642	0.139824	0.00190609	0.158981	0.00321711	0.173679	0.00437193	1.00101
95	0.443625	0.519295	4.13443	780318702	6101259	0.219681	0.00775827	0.117087	0.000599947	0.141122	0.00165018	0.161308	0.00295963	0.17695	0.00416037	1.00073
96	0.441352	0.511088	3.98358	774264970	6053732	0.225735	0.00775803	0.117443	0.000456017	0.142218	0.00140475	0.163413	0.00269754	0.180024	0.00393921	1.00058
97	0.439117	0.503089	3.84264	768257289	6007681	0.231743	0.00775921	0.117704	0.00033737	0.143127	0.00117381	0.165297	0.00243313	0.182896	0.00370851	1.00065
98	0.436921	0.495292	3.70691	762295588	5961701	0.237704	0.00776003	0.117891	0.000242889	0.143865	0.00096077	0.166963	0.00216839	0.18556	0.00346757	1.00069
99	0.434764	0.487698	3.57917	756386162	5909426	0.243614	0.00775215	0.118021	0.000170082	0.14445	0.000767927	0.168415	0.00190431	0.18801	0.00321412	0.999618
100	0.432642	0.480288	3.45558	750518177	5867985	0.249482	0.00775792	0.118109	0.000116369	0.144904	0.00059992	0.169663	0.00165011	0.190248	0.00295949	1.00032
101	0.430555	0.473056	3.34252	744694214	5823963	0.255306	0.00775992	0.118167	7.76768e-05	0.145246	0.000456128	0.170717	0.00140509	0.192273	0.0026982	1.00055
102	0.428497	0.465994	3.23556	738914119	5780095	0.261086	0.0077617	0.118205	5.06063e-05	0.145498	0.000337479	0.171592	0.00117419	0.194086	0.00243391	1.00075
103	0.426473	0.459103	3.1322	733181324	5732795	0.266819	0.00775841	0.118228	3.20422e-05	0.145677	0.000242838	0.172302	0.000960568	0.195688	0.00216793	1.0003
104	0.424481	0.452375	3.03384	727493065	5688259	0.272507	0.00775833	0.118243	1.97061e-05	0.145802	0.000170218	0.172865	0.00076854	0.197085	0.00190583	1.00028
105	0.422518	0.445806	2.94169	721853619	5639446	0.278146	0.00775189	0.118251	1.17054e-05	0.145887	0.000116278	0.173301	0.000599454	0.198285	0.00164883	0.999435
106	0.420583	0.439383	2.8538	716254277	5599342	0.283746	0.00775689	0.118256	6.7485e-06	0.145943	7.76465e-05	0.17363	0.00045595	0.199298	0.00140454	1.00007
107	0.418676	0.433103	2.76865	710696495	5557782	0.289304	0.00775951	0.118259	3.72456e-06	0.145979	5.0592e-05	0.173872	0.000337383	0.200139	0.00117386	1.0004
108	0.416799	0.426974	2.68742	705190239	5506256	0.29481	0.00774769	0.11826	2.0144e-06	0.146002	3.1998e-05	0.174044	0.000242503	0.200821	0.000959241	0.99887
109	0.414945	0.420971	2.61322	699721668	5468571	0.300278	0.00775475	0.118261	1.00812e-06	0.146015	1.96971e-05	0.174164	0.000170139	0.201363	0.000768185	0.999775
110	0.413119	0.415103	2.53649	694295098	5426570	0.305705	0.00775533	0.118261	4.6532e-07	0.146024	1.17105e-05	0.174246	0.00011633	0.201782	0.000599719	0.999846
111	0.411317	0.40936	2.46653	688908637	5386461	0.311091	0.00775817	0.118261	2.32745e-07	0.146028	6.74961e-06	0.1743	7.76593e-05	0.202099	0.000456025	1.00021
112	0.40954	0.40374	2.39829	683563851	5344786	0.316436	0.00775834	0.118262	7.75834e-08	0.146031	3.724e-06	0.174335	5.05844e-05	0.202331	0.000337333	1.00023
113	0.407786	0.398239	2.33462	678261955	5301896	0.321738	0.00775626	0.118262	7.75626e-08	0.146032	2.01663e-06	0.174356	3.20333e-05	0.202497	0.000242771	0.999958
114	0.406052	0.392851	2.27452	672999828	5262127	0.327	0.00775825	0.118262	0	0.146033	1.00857e-06	0.17437	1.9706e-05	0.202613	0.000170216	1.00021
115	0.40434	0.387576	2.21555	667781446	5218382	0.332219	0.00775391	0.118262	0	0.146033	4.65235e-07	0.174378	1.17084e-05	0.202691	0.000116309	0.999654
116	0.402651	0.382407	2.15748	662599649	5181797	0.3374	0.00775972	0.118262	0	0.146033	2.32792e-07	0.174382	6.75096e-06	0.202743	7.76748e-05	1.0004
117	0.400986	0.377347	2.09958	657457602	5142047	0.342542	0.00776041	0.118262	0	0.146033	7.76041e-08	0.174385	3.725e-06	0.202776	5.05979e-05	1.00049
118	0.39934	0.37239	2.04982	652359540	5098062	0.34764	0.00775421	0.118262	0	0.146034	7.75421e-08	0.174386	2.01609e-06	0.202797	3.20249e-05	0.999689
119	0.397714	0.367532	1.99902	647301454	5058086	0.352699	0.00775352	0.118262	0	0.146034	0	0.174387	1.00796e-06	0.20281	1.9694e-05	0.999601
120	0.396107	0.362766	1.94918	642276644	5024810	0.357723	0.0077627	0.118262	0	0.146034	0	0.174387	4.65762e-07	0.202818	1.17217e-05	1.00078
