# Supplementary material for: Quantifying the Potential for Future Gene Therapy to Lower Lifetime Risk of Polygenic Late-Onset Diseases
Source: MDPI journal article supplement (doi:10.3390/ijms20133352), 2019-07-08
Supplement: s2 [file s2 › SuppFiles/Results/LODsRareMedium/ProstateCancer/1.000/IndividualsByBetaDistrib.csv]

nEntry	Beta	nDetrimentalCount	nFractionPopulation	nCumulativeFractionPopulation	nEditsNeeded	nIndividuals
0	-19.8	0	0	1	0	0
1	-19.6	0	0	1	0	0
2	-19.4	0	0	1	0	0
3	-19.2	0	0	1	0	0
4	-19	0	0	1	0	0
5	-18.8	0	0	1	0	0
6	-18.6	0	0	1	0	0
7	-18.4	0	0	1	0	0
8	-18.2	0	0	1	0	0
9	-18	0	0	1	0	0
10	-17.8	0	0	1	0	0
11	-17.6	0	0	1	0	0
12	-17.4	0	0	1	0	0
13	-17.2	0	0	1	0	0
14	-17	0	0	1	0	0
15	-16.8	0	0	1	0	0
16	-16.6	0	0	1	0	0
17	-16.4	0	0	1	0	0
18	-16.2	0	0	1	0	0
19	-16	0	0	1	0	0
20	-15.8	0	0	1	0	0
21	-15.6	0	0	1	0	0
22	-15.4	0	0	1	0	0
23	-15.2	0	0	1	0	0
24	-15	0	0	1	0	0
25	-14.8	0	0	1	0	0
26	-14.6	0	0	1	0	0
27	-14.4	0	0	1	0	0
28	-14.2	0	0	1	0	0
29	-14	0	0	1	0	0
30	-13.8	0	0	1	0	0
31	-13.6	0	0	1	0	0
32	-13.4	0	0	1	0	0
33	-13.2	0	0	1	0	0
34	-13	0	0	1	0	0
35	-12.8	0	0	1	0	0
36	-12.6	0	0	1	0	0
37	-12.4	0	0	1	0	0
38	-12.2	0	0	1	0	0
39	-12	0	0	1	0	0
40	-11.8	0	0	1	0	0
41	-11.6	0	0	1	0	0
42	-11.4	0	0	1	0	0
43	-11.2	0	0	1	0	0
44	-11	0	0	1	0	0
45	-10.8	0	0	1	0	0
46	-10.6	0	0	1	0	0
47	-10.4	0	0	1	0	0
48	-10.2	0	0	1	0	0
49	-10	0	0	1	0	0
50	-9.8	0	0	1	0	0
51	-9.6	0	0	1	0	0
52	-9.4	0	0	1	0	0
53	-9.2	0	0	1	0	0
54	-9	0	0	1	0	0
55	-8.8	0	0	1	0	0
56	-8.6	0	0	1	0	0
57	-8.4	0	3.2e-08	1	0	32
58	-8.2	1	6.5e-08	0.99999997	0	65
59	-8	1.4591	2.57e-07	0.9999999	0	257
60	-7.8	1.6382	3.87e-07	0.99999965	0	387
61	-7.6	2.433	1.478e-06	0.99999926	0	1478
62	-7.4	2.8848	4.029e-06	0.99999778	0	4029
63	-7.2	3.1723	5.304e-06	0.99999375	0	5304
64	-7	3.7912	1.4282e-05	0.99998845	0	14282
65	-6.8	4.0658	2.2599e-05	0.99997417	0	22599
66	-6.6	4.5717	4.0684e-05	0.99995157	0	40684
67	-6.4	4.9849	8.6634e-05	0.99991088	0	86634
68	-6.2	5.328	0.000120078	0.99982425	0	120078
69	-6	5.8655	0.000206824	0.99970417	0	206824
70	-5.8	6.2006	0.000338297	0.99949735	0	338297
71	-5.6	6.5873	0.000472125	0.99915905	0	472125
72	-5.4	7.0885	0.000731345	0.99868693	0	731345
73	-5.2	7.4189	0.001047266	0.99795558	0	1047266
74	-5	7.8337	0.001402959	0.99690831	0	1402959
75	-4.8	8.2519	0.0020146	0.99550536	0	2014600
76	-4.6	8.5836	0.002703087	0.99349075	0	2703087
77	-4.4	9.0261	0.003519134	0.99078767	0	3519134
78	-4.2	9.4338	0.004642956	0.98726853	0	4642956
79	-4	9.7655	0.005849207	0.98262558	0	5849207
80	-3.8	10.205	0.007251911	0.97677637	0	7251911
81	-3.6	10.585	0.009051686	0.96952446	0	9051686
82	-3.4	10.948	0.010811017	0.96047277	0	10811017
83	-3.2	11.359	0.012897397	0.94966176	0	12897397
84	-3	11.751	0.015230864	0.93676436	0	15230864
85	-2.8	12.087	0.017284467	0.9215335	0	17284467
86	-2.6	12.504	0.020108585	0.90424903	0	20108585
87	-2.4	12.873	0.022754273	0.88414044	0	22754273
88	-2.2	13.248	0.025037657	0.86138617	0	25037657
89	-2	13.642	0.027617634	0.83634851	0	27617634
90	-1.8	14.01	0.030183317	0.80873088	0	30183317
91	-1.6	14.382	0.032218475	0.77854756	0	32218475
92	-1.4	14.78	0.033843433	0.74632909	0	33843433
93	-1.2	15.135	0.035909699	0.71248566	0	35909699
94	-1	15.512	0.037266033	0.67657596	0	37266033
95	-0.8	15.892	0.038234033	0.63930992	0	38234033
96	-0.6	16.259	0.038907777	0.60107589	0	38907777
97	-0.4	16.632	0.039054243	0.56216811	0	39054243
98	-0.2	17.01	0.039188501	0.52311387	0	39188501
99	0	17.371	0.038651925	0.48392537	0	38651925
100	0.2	17.746	0.03794726	0.44527344	0.37526	37947260
101	0.4	18.119	0.036751683	0.40732618	0.74816	36751683
102	0.6	18.488	0.035380659	0.3705745	1.1173	35380659
103	0.8	18.859	0.033657329	0.33519384	1.4881	33657329
104	1	19.23	0.031852271	0.30153651	1.8587	31852271
105	1.2	19.59	0.02975022	0.26968424	2.2195	29750220
106	1.4	19.959	0.027792959	0.23993402	2.5879	27792959
107	1.6	20.328	0.025679632	0.21214106	2.9575	25679632
108	1.8	20.693	0.023571399	0.18646143	3.3226	23571399
109	2	21.061	0.021370198	0.16289003	3.6897	21370198
110	2.2	21.428	0.019291389	0.14151983	4.0566	19291389
111	2.4	21.795	0.017202779	0.12222845	4.4245	17202779
112	2.6	22.159	0.015344226	0.10502567	4.7882	15344226
113	2.8	22.521	0.013477745	0.08968144	5.1499	13477745
114	3	22.885	0.011862271	0.076203695	5.5141	11862271
115	3.2	23.252	0.010312086	0.064341424	5.8813	10312086
116	3.4	23.614	0.008927026	0.054029338	6.2429	8927026
117	3.6	23.981	0.007626255	0.045102312	6.6099	7626255
118	3.8	24.337	0.0065285	0.037476057	6.9659	6528500
119	4	24.706	0.005529571	0.030947557	7.3346	5529571
120	4.2	25.064	0.00465917	0.025417986	7.6929	4659170
121	4.4	25.429	0.003892118	0.020758816	8.0584	3892118
122	4.6	25.789	0.003237237	0.016866698	8.4186	3237237
123	4.8	26.157	0.002671114	0.013629461	8.7857	2671114
124	5	26.511	0.002197973	0.010958347	9.1399	2197973
125	5.2	26.875	0.001785758	0.008760374	9.5043	1785758
126	5.4	27.229	0.001456275	0.006974616	9.8586	1456275
127	5.6	27.595	0.001173701	0.005518341	10.225	1173701
128	5.8	27.955	0.00094118	0.00434464	10.584	941180
129	6	28.318	0.000751326	0.00340346	10.947	751326
130	6.2	28.673	0.000594845	0.002652134	11.302	594845
131	6.4	29.04	0.000468927	0.002057289	11.669	468927
132	6.6	29.393	0.000367508	0.001588362	12.022	367508
133	6.8	29.753	0.000289131	0.001220854	12.382	289131
134	7	30.106	0.000223912	0.000931723	12.735	223912
135	7.2	30.472	0.00017213	0.000707811	13.101	172130
136	7.4	30.831	0.000132318	0.000535681	13.46	132318
137	7.6	31.189	0.000101249	0.000403363	13.818	101249
138	7.8	31.543	7.6445e-05	0.000302114	14.172	76445
139	8	31.913	5.7902e-05	0.000225669	14.542	57902
140	8.2	32.263	4.3622e-05	0.000167767	14.892	43622
141	8.4	32.623	3.2535e-05	0.000124145	15.252	32535
142	8.6	32.979	2.4336e-05	9.161e-05	15.608	24336
143	8.8	33.345	1.8189e-05	6.7274e-05	15.974	18189
144	9	33.691	1.3535e-05	4.9085e-05	16.32	13535
145	9.2	34.064	9.981e-06	3.555e-05	16.693	9981
146	9.4	34.43	7.113e-06	2.5569e-05	17.059	7113
147	9.6	34.766	5.201e-06	1.8456e-05	17.396	5201
148	9.8	35.119	3.854e-06	1.3255e-05	17.748	3854
149	10	35.465	2.664e-06	9.401e-06	18.094	2664
150	10.2	35.838	1.951e-06	6.737e-06	18.467	1951
151	10.4	36.195	1.459e-06	4.786e-06	18.824	1459
152	10.6	36.573	9.73e-07	3.327e-06	19.203	973
153	10.8	36.934	7.38e-07	2.354e-06	19.563	738
154	11	37.323	4.86e-07	1.616e-06	19.952	486
155	11.2	37.583	3.26e-07	1.13e-06	20.212	326
156	11.4	37.992	2.57e-07	8.04e-07	20.621	257
157	11.6	38.018	1.69e-07	5.47e-07	20.647	169
158	11.8	38.719	1.14e-07	3.78e-07	21.348	114
159	12	39.113	9.7e-08	2.64e-07	21.743	97
160	12.2	38.95	6e-08	1.67e-07	21.579	60
161	12.4	39.786	4.2e-08	1.07e-07	22.415	42
162	12.6	40.182	2.2e-08	6.5e-08	22.811	22
163	12.8	40.75	8e-09	4.3e-08	23.379	8
164	13	41.5	1.2e-08	3.5e-08	24.129	12
165	13.2	41.667	6e-09	2.3e-08	24.296	6
166	13.4	42.286	7e-09	1.7e-08	24.915	7
167	13.6	41	2e-09	1e-08	23.629	2
168	13.8	43.667	3e-09	8e-09	26.296	3
169	14	44	2e-09	5e-09	26.629	2
170	14.2	41	2e-09	3e-09	23.629	2
171	14.4	0	0	1e-09	0	0
172	14.6	0	0	1e-09	0	0
173	14.8	46	1e-09	1e-09	28.629	1
174	15	0	0	0	0	0
175	15.2	0	0	0	0	0
176	15.4	0	0	0	0	0
177	15.6	0	0	0	0	0
178	15.8	0	0	0	0	0
179	16	0	0	0	0	0
180	16.2	0	0	0	0	0
181	16.4	0	0	0	0	0
182	16.6	0	0	0	0	0
183	16.8	0	0	0	0	0
184	17	0	0	0	0	0
185	17.2	0	0	0	0	0
186	17.4	0	0	0	0	0
187	17.6	0	0	0	0	0
188	17.8	0	0	0	0	0
189	18	0	0	0	0	0
190	18.2	0	0	0	0	0
191	18.4	0	0	0	0	0
192	18.6	0	0	0	0	0
193	18.8	0	0	0	0	0
194	19	0	0	0	0	0
195	19.2	0	0	0	0	0
196	19.4	0	0	0	0	0
197	19.6	0	0	0	0	0
198	19.8	0	0	0	0	0
199	20	0	0	0	0	0
