# Supplementary material for: Quantifying the Potential for Future Gene Therapy to Lower Lifetime Risk of Polygenic Late-Onset Diseases
Source: MDPI journal article supplement (doi:10.3390/ijms20133352), 2019-07-08
Supplement: s2 [file s2 › SuppFiles/Results/LODsRareMedium/ProstateCancer/EnvironmentArray.csv]

Age	Env	Incidence	CasesExpected
0	0	-5.64657e-05	0
1	0	-5.6465e-05	0
2	0	-5.64642e-05	0
3	0	-5.64632e-05	0
4	0	-5.64619e-05	0
5	0	-5.64602e-05	0
6	0	-5.64581e-05	0
7	0	-5.64554e-05	0
8	0	-5.6452e-05	0
9	0	-5.64476e-05	0
10	0	-5.64421e-05	0
11	0	-5.6435e-05	0
12	0	-5.6426e-05	0
13	0	-5.64146e-05	0
14	0	-5.64002e-05	0
15	0	-5.63817e-05	0
16	0	-5.63583e-05	0
17	0	-5.63284e-05	0
18	0	-5.62905e-05	0
19	0	-5.62423e-05	0
20	0	-5.61809e-05	0
21	0	-5.61029e-05	0
22	0	-5.60037e-05	0
23	0	-5.58775e-05	0
24	0	-5.57171e-05	0
25	0	-5.5513e-05	0
26	0	-5.52536e-05	0
27	0	-5.49236e-05	0
28	0	-5.45039e-05	0
29	0	-5.39704e-05	0
30	0	-5.32919e-05	0
31	0	-5.24291e-05	0
32	0	-5.13322e-05	0
33	0	-4.99376e-05	0
34	0	-4.81648e-05	0
35	0	-4.59113e-05	0
36	0	-4.30472e-05	0
37	0	-3.94079e-05	0
38	0	-3.47844e-05	0
39	0	-2.89122e-05	0
40	0	-2.1457e-05	0
41	0	-1.19963e-05	0
42	0	2.28067e-09	0
43	1.3580618e-06	1.52083e-05	380
44	3.1619571e-06	3.44609e-05	861
45	5.5384529e-06	5.88078e-05	1470
46	8.6605024e-06	8.95505e-05	2238
47	1.2753574e-05	0.000128295	3206
48	1.8111835e-05	0.000177007	4423
49	2.5135912e-05	0.000238066	5948
50	3.4303682e-05	0.000314313	7852
51	4.6251357e-05	0.000409075	10216
52	6.1788217e-05	0.00052616	13134
53	8.185905e-05	0.000669781	16711
54	0.00010771609	0.000844395	21053
55	0.00014062502	0.00105441	26268
56	0.00018216501	0.00130375	32445
57	0.00023402836	0.00159527	39648
58	0.00029771579	0.00193002	47891
59	0.00037428823	0.00230661	57126
60	0.00046487559	0.00272055	67222
61	0.00056940954	0.00316416	77970
62	0.00068724781	0.0036268	89088
63	0.00081712748	0.00409582	100244
64	0.00095631162	0.00455783	111094
65	0.0011024283	0.00500023	121322
66	0.0012522399	0.00541254	130670
67	0.0014034929	0.00578719	138958
68	0.001554225	0.00611988	146096
69	0.0017022829	0.00640933	152069
70	0.0018476493	0.0066567	156926
71	0.0019886601	0.00686493	160756
72	0.0021262726	0.00703795	163677
73	0.0022603989	0.0071802	165811
74	0.0023907785	0.00729612	167279
75	0.002518649	0.00738991	168194
76	0.0026439861	0.00746535	168656
77	0.0027679958	0.00752576	168751
78	0.0028900899	0.00757394	168554
79	0.0030114934	0.00761226	168123
80	0.0031323665	0.00764266	167510
81	0.0032530266	0.00766673	166754
82	0.0033735999	0.00768577	165886
83	0.0034936974	0.0077008	164933
84	0.0036147634	0.00771267	163915
85	0.0037365296	0.00772202	162850
86	0.0038574815	0.00772939	161746
87	0.0039805013	0.0077352	160616
88	0.0041049713	0.00773977	159467
89	0.0042293446	0.00774336	158305
90	0.004354379	0.0077462	157136
91	0.0044806468	0.00774842	155964
92	0.0046081876	0.00775018	154791
93	0.0047357337	0.00775156	153618
94	0.0048663616	0.00775264	152449
95	0.0049967211	0.00775349	151283
96	0.0051286681	0.00775416	150122
97	0.0052617969	0.00775469	148967
98	0.0053957252	0.00775511	147819
99	0.0055313119	0.00775543	146678
100	0.0056674672	0.00775569	145544
101	0.0058041918	0.00775589	144419
102	0.0059426472	0.00775605	143302
103	0.0060819925	0.00775617	142194
104	0.006223109	0.00775627	141093
105	0.0063661721	0.00775635	140000
106	0.006510276	0.00775641	138915
107	0.0066558735	0.00775646	137839
108	0.006802243	0.00775649	136769
109	0.0069507245	0.00775652	135708
110	0.0071000818	0.00775655	134656
111	0.0072511308	0.00775656	133613
112	0.00740366	0.00775658	132576
113	0.0075571898	0.00775659	131548
114	0.0077112254	0.0077566	130527
115	0.0078675747	0.00775661	129513
116	0.0080244345	0.00775661	128509
117	0.0081827132	0.00775662	127512
118	0.0083432409	0.00775662	126522
119	0.0085061075	0.00775662	125541
