# Supplementary material for: Quantifying the Potential for Future Gene Therapy to Lower Lifetime Risk of Polygenic Late-Onset Diseases
Source: MDPI journal article supplement (doi:10.3390/ijms20133352), 2019-07-08
Supplement: s2 [file s2 › SuppFiles/Results/LODsRareMedium/ProstateCancer/EnvironmentArraySD.csv]

Age	Env	EnvSD	Incidence	CasesExpected
0	0	0	-5.64657e-05	0
1	0	0	-5.6465e-05	0
2	0	0	-5.64642e-05	0
3	0	0	-5.64632e-05	0
4	0	0	-5.64619e-05	0
5	0	0	-5.64602e-05	0
6	0	0	-5.64581e-05	0
7	0	0	-5.64554e-05	0
8	0	0	-5.6452e-05	0
9	0	0	-5.64476e-05	0
10	0	0	-5.64421e-05	0
11	0	0	-5.6435e-05	0
12	0	0	-5.6426e-05	0
13	0	0	-5.64146e-05	0
14	0	0	-5.64002e-05	0
15	0	0	-5.63817e-05	0
16	0	0	-5.63583e-05	0
17	0	0	-5.63284e-05	0
18	0	0	-5.62905e-05	0
19	0	0	-5.62423e-05	0
20	0	0	-5.61809e-05	0
21	0	0	-5.61029e-05	0
22	0	0	-5.60037e-05	0
23	0	0	-5.58775e-05	0
24	0	0	-5.57171e-05	0
25	0	0	-5.5513e-05	0
26	0	0	-5.52536e-05	0
27	0	0	-5.49236e-05	0
28	0	0	-5.45039e-05	0
29	0	0	-5.39704e-05	0
30	0	0	-5.32919e-05	0
31	0	0	-5.24291e-05	0
32	0	0	-5.13322e-05	0
33	0	0	-4.99376e-05	0
34	0	0	-4.81648e-05	0
35	0	0	-4.59113e-05	0
36	0	0	-4.30472e-05	0
37	0	0	-3.94079e-05	0
38	0	0	-3.47844e-05	0
39	0	0	-2.89122e-05	0
40	0	0	-2.1457e-05	0
41	0	0	-1.19963e-05	0
42	0	0	2.28067e-09	0
43	1.3580618e-06	3.53e-09	1.52083e-05	380
44	3.1619571e-06	5.732e-09	3.44609e-05	861
45	5.5384529e-06	5.75e-09	5.88078e-05	1470
46	8.6605024e-06	1.253e-08	8.95505e-05	2238
47	1.2753574e-05	1.311e-08	0.000128295	3206
48	1.8111835e-05	1.18e-08	0.000177007	4423
49	2.5135912e-05	1.7e-08	0.000238066	5948
50	3.4303682e-05	2.264e-08	0.000314313	7852
51	4.6251357e-05	2.499e-08	0.000409075	10216
52	6.1788217e-05	1.649e-08	0.00052616	13134
53	8.185905e-05	3.094e-08	0.000669781	16711
54	0.00010771609	4.035e-08	0.000844395	21053
55	0.00014062502	6.147e-08	0.00105441	26268
56	0.00018216501	6.804e-08	0.00130375	32445
57	0.00023402836	5.317e-08	0.00159527	39648
58	0.00029771579	6.491e-08	0.00193002	47891
59	0.00037428823	8.782e-08	0.00230661	57126
60	0.00046487559	1.279e-07	0.00272055	67222
61	0.00056940954	1.245e-07	0.00316416	77970
62	0.00068724781	1.67e-07	0.0036268	89088
63	0.00081712748	1.217e-07	0.00409582	100244
64	0.00095631162	8.728e-08	0.00455783	111094
65	0.0011024283	1.711e-07	0.00500023	121322
66	0.0012522399	3e-07	0.00541254	130670
67	0.0014034929	2.588e-07	0.00578719	138958
68	0.001554225	2.487e-07	0.00611988	146096
69	0.0017022829	1.843e-07	0.00640933	152069
70	0.0018476493	1.831e-07	0.0066567	156926
71	0.0019886601	2.614e-07	0.00686493	160756
72	0.0021262726	2.539e-07	0.00703795	163677
73	0.0022603989	3.205e-07	0.0071802	165811
74	0.0023907785	3.652e-07	0.00729612	167279
75	0.002518649	9.116e-07	0.00738991	168194
76	0.0026439861	4.425e-07	0.00746535	168656
77	0.0027679958	5.173e-07	0.00752576	168751
78	0.0028900899	7.341e-07	0.00757394	168554
79	0.0030114934	3.924e-07	0.00761226	168123
80	0.0031323665	4.021e-07	0.00764266	167510
81	0.0032530266	4.647e-07	0.00766673	166754
82	0.0033735999	4.904e-07	0.00768577	165886
83	0.0034936974	6.283e-07	0.0077008	164933
84	0.0036147634	5.869e-07	0.00771267	163915
85	0.0037365296	5.44e-07	0.00772202	162850
86	0.0038574815	4.517e-07	0.00772939	161746
87	0.0039805013	8.801e-07	0.0077352	160616
88	0.0041049713	7.325e-07	0.00773977	159467
89	0.0042293446	4.014e-07	0.00774336	158305
90	0.004354379	5.292e-07	0.0077462	157136
91	0.0044806468	7.179e-07	0.00774842	155964
92	0.0046081876	7.263e-07	0.00775018	154791
93	0.0047357337	6.384e-07	0.00775156	153618
94	0.0048663616	1.254e-06	0.00775264	152449
95	0.0049967211	9.212e-07	0.00775349	151283
96	0.0051286681	8.326e-07	0.00775416	150122
97	0.0052617969	1e-06	0.00775469	148967
98	0.0053957252	6.254e-07	0.00775511	147819
99	0.0055313119	8.863e-07	0.00775543	146678
100	0.0056674672	6.095e-07	0.00775569	145544
101	0.0058041918	6.697e-07	0.00775589	144419
102	0.0059426472	1.123e-06	0.00775605	143302
103	0.0060819925	7.598e-07	0.00775617	142194
104	0.006223109	1.155e-06	0.00775627	141093
105	0.0063661721	9.876e-07	0.00775635	140000
106	0.006510276	1.086e-06	0.00775641	138915
107	0.0066558735	1.166e-06	0.00775646	137839
108	0.006802243	1.356e-06	0.00775649	136769
109	0.0069507245	1.177e-06	0.00775652	135708
110	0.0071000818	1.162e-06	0.00775655	134656
111	0.0072511308	1.353e-06	0.00775656	133613
112	0.00740366	1.583e-06	0.00775658	132576
113	0.0075571898	1.462e-06	0.00775659	131548
114	0.0077112254	1.103e-06	0.0077566	130527
115	0.0078675747	1.429e-06	0.00775661	129513
116	0.0080244345	1.096e-06	0.00775661	128509
117	0.0081827132	7.802e-07	0.00775662	127512
118	0.0083432409	1.544e-06	0.00775662	126522
119	0.0085061075	1.694e-06	0.00775662	125541
