# Supplementary material for: Quantifying the Potential for Future Gene Therapy to Lower Lifetime Risk of Polygenic Late-Onset Diseases
Source: MDPI journal article supplement (doi:10.3390/ijms20133352), 2019-07-08
Supplement: s2 [file s2 › SuppFiles/Results/LODsRareMedium/ProstateCancer/FrailtyAnalysis.csv]

Age	Heritability	MeanOR	CaseOR	nControls	nCases	nCumIncidence	nIncidence	nLifeIncidence0	nAbsIncidence0	nLifeIncidence5	nAbsIncidence5	nLifeIncidence10	nAbsIncidence10	nLifeIncidence15	nAbsIncidence15
44	0.55753	0.99944	236.23	9999833	167	1.67e-05	1.67e-05	1.59e-05	1.59e-05	1.6071e-05	1.6071e-05	1.6211e-05	1.6211e-05	1.6333e-05	1.6333e-05
45	0.55747	0.99926	157.7	9999475	358	5.25e-05	3.5801e-05	4.9895e-05	3.3996e-05	5.0457e-05	3.4386e-05	5.0906e-05	3.4696e-05	5.1296e-05	3.4964e-05
46	0.55738	0.99896	148.8	9998880	595	0.000112	5.9503e-05	0.00010623	5.6342e-05	0.00010749	5.7037e-05	0.00010847	5.7571e-05	0.00010932	5.8027e-05
47	0.55725	0.99853	133.41	9997995	885	0.0002005	8.851e-05	0.00018977	8.3548e-05	0.00019214	8.4662e-05	0.00019395	8.5489e-05	0.0001955	8.6185e-05
48	0.55707	0.9979	111.05	9996645	1350	0.0003355	0.00013503	0.00031677	0.00012702	0.00032098	0.00012887	0.00032411	0.00013019	0.00032675	0.00013128
49	0.55683	0.99709	113.13	9994932	1713	0.0005068	0.00017136	0.00047732	0.0001606	0.00048407	0.00016314	0.00048897	0.00016491	0.00049303	0.00016634
50	0.55653	0.99602	101.09	9992611	2321	0.0007389	0.00023222	0.00069395	0.00021674	0.00070447	0.00022051	0.0007119	0.00022305	0.00071797	0.00022505
51	0.55614	0.99458	90.116	9989414	3197	0.0010586	0.00031994	0.00099099	0.00029726	0.0010072	0.00030294	0.0010183	0.00030668	0.0010273	0.00030955
52	0.55567	0.9928	78.453	9985318	4096	0.0014682	0.00041003	0.0013697	0.00037907	0.0013938	0.00038705	0.0014101	0.00039221	0.0014229	0.00039604
53	0.55509	0.99059	74.391	9980148	5170	0.0019852	0.00051776	0.001845	0.00047604	0.0018802	0.00048707	0.0019036	0.00049413	0.0019214	0.0004992
54	0.55439	0.98781	69.126	9973566	6582	0.0026434	0.00065951	0.0024465	0.00060274	0.0024971	0.0006181	0.0025302	0.0006279	0.0025548	0.00063469
55	0.55352	0.98436	63.527	9965175	8391	0.0034825	0.00084132	0.0032084	0.00076385	0.0032802	0.00078526	0.003327	0.0007989	0.0033608	0.00080809
56	0.55251	0.9802	55.832	9954756	10419	0.0045244	0.0010455	0.0041476	0.00094247	0.0042483	0.00097144	0.0043136	0.00099	0.0043595	0.0010022
57	0.55131	0.97519	50.653	9941830	12926	0.005817	0.0012985	0.0053037	0.0011613	0.0054433	0.0012004	0.0055337	0.0012257	0.0055959	0.001242
58	0.5499	0.96916	46.58	9925893	15937	0.0074107	0.001603	0.006717	0.0014216	0.0069086	0.0014739	0.0070329	0.001508	0.0071169	0.0015299
59	0.54829	0.9621	41.434	9906628	19265	0.0093372	0.0019409	0.0084097	0.0017054	0.0086693	0.0017738	0.0088385	0.001819	0.008951	0.0018479
60	0.54646	0.95398	37.95	9883822	22806	0.011618	0.0023021	0.010394	0.0020028	0.01074	0.0020901	0.010967	0.0021487	0.011117	0.002186
61	0.54437	0.94462	34.555	9856742	27080	0.014326	0.0027398	0.012725	0.0023585	0.013181	0.0024697	0.013483	0.0025457	0.013681	0.0025943
62	0.54206	0.93417	31.283	9825531	31211	0.017447	0.0031665	0.015381	0.0026948	0.015972	0.0028321	0.016369	0.0029274	0.016627	0.002989
63	0.53953	0.92258	28.63	9789804	35727	0.02102	0.0036361	0.018385	0.0030567	0.019141	0.0032246	0.019653	0.0033432	0.019988	0.0034206
64	0.53678	0.90993	26.288	9749618	40186	0.025038	0.0041049	0.021719	0.0034057	0.022672	0.0036068	0.023326	0.0037515	0.023754	0.0038471
65	0.53386	0.89638	24.05	9705150	44468	0.029485	0.004561	0.025357	0.0037314	0.02654	0.0039681	0.027363	0.004141	0.027905	0.0042571
66	0.53076	0.88206	22.01	9656561	48589	0.034344	0.0050065	0.029273	0.0040353	0.030723	0.0043097	0.031743	0.004513	0.032419	0.0046517
67	0.52753	0.86712	20.185	9604165	52396	0.039584	0.0054259	0.033429	0.0043041	0.035182	0.0046177	0.03643	0.0048529	0.037263	0.0050162
68	0.52418	0.85177	18.666	9548586	55579	0.045141	0.005787	0.037763	0.0045125	0.039854	0.0048648	0.041358	0.0051319	0.042373	0.0053207
69	0.52073	0.83609	17.526	9490287	58299	0.050971	0.0061055	0.042226	0.0046738	0.044691	0.0050656	0.046481	0.0053647	0.047701	0.0055799
70	0.51727	0.82037	16.078	9429756	60531	0.057024	0.0063782	0.046768	0.004786	0.049643	0.0052181	0.051747	0.0055491	0.053197	0.0057909
71	0.51377	0.80462	14.847	9367034	62722	0.063297	0.0066515	0.051373	0.004884	0.054699	0.0053611	0.057146	0.0057257	0.058851	0.0059958
72	0.51026	0.789	13.898	9303039	63995	0.069696	0.0068319	0.055962	0.0048992	0.059775	0.0054194	0.062593	0.0058143	0.064575	0.0061104
73	0.50673	0.77341	12.942	9237136	65903	0.076286	0.007084	0.060568	0.0049502	0.064914	0.0055239	0.068133	0.0059552	0.070419	0.0062822
74	0.50329	0.75829	11.993	9171106	66030	0.082889	0.0071483	0.065053	0.0048559	0.069969	0.005472	0.073611	0.0059307	0.076221	0.006281
75	0.49991	0.74349	11.075	9104148	66958	0.089585	0.007301	0.069463	0.0048089	0.074993	0.0054784	0.079089	0.0059731	0.082046	0.0063519
76	0.49651	0.72894	10.574	9036882	67266	0.096312	0.0073885	0.073747	0.0047054	0.079932	0.0054252	0.084511	0.0059551	0.087836	0.0063601
77	0.49319	0.71476	9.9063	8969347	67535	0.10307	0.0074733	0.077892	0.0045869	0.084775	0.0053591	0.089868	0.0059281	0.093584	0.00636
78	0.48993	0.701	9.3061	8901925	67422	0.10981	0.0075169	0.081865	0.0044297	0.089486	0.0052527	0.095125	0.0058615	0.099252	0.0063191
79	0.48673	0.68765	8.7994	8834779	67146	0.11652	0.0075429	0.085649	0.00425	0.094048	0.0051239	0.10027	0.0057741	0.10482	0.0062581
80	0.48361	0.67471	8.2576	8767765	67014	0.12322	0.0075852	0.089242	0.0040676	0.098462	0.0049961	0.10529	0.0056917	0.11031	0.0062056
81	0.48051	0.66199	7.9113	8700487	67278	0.12995	0.0076733	0.092658	0.0038962	0.10275	0.0048868	0.11023	0.0056343	0.11573	0.0061847
82	0.47749	0.64975	7.4496	8633927	66560	0.13661	0.0076501	0.09584	0.0036564	0.10683	0.0046954	0.11501	0.0054859	0.12101	0.0060684
83	0.47452	0.63785	7.0722	8567608	66319	0.14324	0.0076812	0.098803	0.0034323	0.11074	0.0045265	0.11964	0.0053675	0.12618	0.0059896
84	0.47161	0.62623	6.7081	8501181	66427	0.14988	0.0077533	0.10156	0.0032146	0.11448	0.0043685	0.12415	0.0052668	0.13126	0.0059351
85	0.4688	0.61511	6.3485	8435946	65235	0.15641	0.0076736	0.10405	0.0029273	0.11798	0.004115	0.12845	0.0050543	0.13616	0.005758
86	0.46605	0.60428	6.044	8370876	65070	0.16291	0.0077134	0.10631	0.002682	0.12128	0.0039166	0.13259	0.0049124	0.14094	0.0056637
87	0.46334	0.5937	5.7818	8305893	64983	0.16941	0.007763	0.10835	0.0024343	0.12439	0.0037103	0.13658	0.0047647	0.1456	0.0055668
88	0.46073	0.58359	5.4973	8242316	63577	0.17577	0.0076544	0.11012	0.0021389	0.12723	0.0034204	0.14033	0.0045108	0.15004	0.0053488
89	0.45814	0.57367	5.3173	8178813	63503	0.18212	0.0077045	0.11168	0.0018926	0.12986	0.0031944	0.14391	0.004341	0.15435	0.0052337
90	0.4556	0.56398	5.035	8115183	63630	0.18848	0.0077799	0.11304	0.0016548	0.13229	0.0029679	0.14732	0.0041719	0.15854	0.0051243
91	0.45311	0.55464	4.8618	8052757	62426	0.19472	0.0076925	0.11417	0.0013929	0.13446	0.0026748	0.15049	0.0039059	0.16252	0.004899
92	0.45069	0.54554	4.6136	7990340	62417	0.20097	0.007751	0.11511	0.0011726	0.13642	0.0024306	0.15347	0.0037046	0.16635	0.0047573
93	0.44827	0.5366	4.4856	7928160	62180	0.20718	0.0077819	0.11588	0.00096348	0.13816	0.0021745	0.15625	0.0034773	0.17002	0.0045859
94	0.44589	0.5279	4.3379	7866624	61536	0.21334	0.0077617	0.11649	0.00076887	0.13967	0.0019067	0.1588	0.0032181	0.17348	0.0043733
95	0.44357	0.51944	4.1457	7805479	61145	0.21945	0.0077727	0.11696	0.00060106	0.14097	0.0016533	0.16113	0.0029651	0.17676	0.0041681
96	0.4413	0.51127	4.0073	7745367	60112	0.22546	0.0077013	0.11732	0.00045268	0.14206	0.0013945	0.16322	0.0026778	0.17981	0.0039104
97	0.43909	0.5033	3.8286	7685380	59987	0.23146	0.0077449	0.11758	0.00033675	0.14297	0.0011716	0.16511	0.0024286	0.18268	0.0037017
98	0.43688	0.49548	3.7065	7625554	59826	0.23744	0.0077844	0.11776	0.00024365	0.14371	0.00096379	0.16678	0.0021752	0.18535	0.0034785
99	0.43473	0.48786	3.5996	7566478	59076	0.24335	0.0077471	0.11789	0.00016997	0.14429	0.00076743	0.16823	0.0019031	0.1878	0.003212
100	0.43263	0.4805	3.4445	7508086	58392	0.24919	0.0077172	0.11798	0.00011576	0.14474	0.00059677	0.16947	0.0016414	0.19003	0.002944
101	0.43053	0.47324	3.3386	7449513	58573	0.25505	0.0078013	0.11804	7.8091e-05	0.14509	0.00045856	0.17053	0.0014126	0.19207	0.0027126
102	0.42849	0.46619	3.226	7391780	57733	0.26082	0.0077499	0.11808	5.0529e-05	0.14534	0.00033697	0.1714	0.0011724	0.19388	0.0024302
103	0.42646	0.45929	3.1353	7334347	57433	0.26657	0.0077698	0.1181	3.2089e-05	0.14552	0.0002432	0.17212	0.00096198	0.19548	0.0021711
104	0.42448	0.45257	3.0107	7277324	57023	0.27227	0.0077748	0.11812	1.9748e-05	0.14564	0.00017058	0.17268	0.00077017	0.19688	0.0019099
105	0.42254	0.44603	2.945	7221221	56103	0.27788	0.0077093	0.11812	1.1641e-05	0.14573	0.00011564	0.17311	0.00059616	0.19808	0.0016398
106	0.4206	0.4396	2.8705	7165312	55909	0.28347	0.0077423	0.11813	6.7358e-06	0.14578	7.7501e-05	0.17344	0.00045509	0.19909	0.0014019
107	0.41867	0.43329	2.7795	7109537	55775	0.28905	0.007784	0.11813	3.7363e-06	0.14582	5.0752e-05	0.17369	0.00033845	0.19993	0.0011776
108	0.41677	0.42709	2.7111	7054132	55405	0.29459	0.0077931	0.11813	2.0262e-06	0.14584	3.2185e-05	0.17386	0.00024392	0.20062	0.00096486
109	0.41491	0.42108	2.6235	6999485	54647	0.30005	0.0077468	0.11813	1.0071e-06	0.14586	1.9677e-05	0.17398	0.00016996	0.20116	0.0007674
110	0.41309	0.41524	2.5272	6945334	54151	0.30547	0.0077364	0.11813	4.6419e-07	0.14586	1.1682e-05	0.17406	0.00011605	0.20158	0.00059826
111	0.4113	0.40951	2.4699	6891673	53661	0.31083	0.0077262	0.11813	2.3179e-07	0.14587	6.7218e-06	0.17411	7.7339e-05	0.20189	0.00045415
112	0.40952	0.40388	2.4055	6838155	53518	0.31618	0.0077656	0.11813	7.7656e-08	0.14587	3.7275e-06	0.17415	5.0632e-05	0.20213	0.00033765
113	0.40778	0.39838	2.3248	6785017	53138	0.3215	0.0077708	0.11813	7.7708e-08	0.14587	2.0204e-06	0.17417	3.2093e-05	0.20229	0.00024323
114	0.40606	0.39302	2.2593	6732492	52525	0.32675	0.0077413	0.11813	0	0.14587	1.0064e-06	0.17418	1.9663e-05	0.20241	0.00016984
115	0.40435	0.38773	2.2228	6680234	52258	0.33198	0.0077621	0.11813	0	0.14587	4.6572e-07	0.17419	1.1721e-05	0.20249	0.00011643
116	0.40267	0.38259	2.1569	6628730	51504	0.33713	0.0077099	0.11813	0	0.14587	2.313e-07	0.1742	6.7076e-06	0.20254	7.7176e-05
117	0.401	0.37754	2.1032	6577387	51343	0.34226	0.0077455	0.11813	0	0.14587	7.7455e-08	0.1742	3.7179e-06	0.20257	5.0501e-05
118	0.39935	0.37258	2.0509	6526394	50993	0.34736	0.0077528	0.11813	0	0.14587	7.7528e-08	0.1742	2.0157e-06	0.20259	3.2019e-05
119	0.39771	0.36768	2.0101	6475533	50861	0.35245	0.0077931	0.11813	0	0.14587	0	0.1742	1.0131e-06	0.20261	1.9795e-05
120	0.3961	0.36291	1.9483	6425172	50361	0.35748	0.0077771	0.11813	0	0.14587	0	0.1742	4.6663e-07	0.20261	1.1743e-05
