# Supplementary material for: Quantifying the Potential for Future Gene Therapy to Lower Lifetime Risk of Polygenic Late-Onset Diseases
Source: MDPI journal article supplement (doi:10.3390/ijms20133352), 2019-07-08
Supplement: s2 [file s2 › SuppFiles/Results/LODsRareMedium/Stroke/-1.000/FrailtyAnalysis.csv]

Age	Heritability	MeanOR	CaseOR	nControls	nCases	nCumIncidence	nIncidence	nLifeIncidence0	nAbsIncidence0	nLifeIncidence5	nAbsIncidence5	nLifeIncidence10	nAbsIncidence10	nLifeIncidence15	nAbsIncidence15	nIncActDivExp
39	0.156808	0.562712	0.814615	999992997	7003	7.003e-06	7.003e-06	6.80012e-06	6.80012e-06	6.8455e-06	6.8455e-06	6.88276e-06	6.88276e-06	6.91508e-06	6.91508e-06	0.204248
40	0.156809	0.562709	0.812787	999977879	15118	2.2121e-05	1.51181e-05	2.14575e-05	1.46575e-05	2.16056e-05	1.47602e-05	2.17261e-05	1.48435e-05	2.183e-05	1.4915e-05	0.207188
41	0.15681	0.562704	0.811358	999953648	24231	4.6352e-05	2.42315e-05	4.4912e-05	2.3455e-05	4.52331e-05	2.3628e-05	4.5492e-05	2.37664e-05	4.57136e-05	2.38842e-05	0.207907
42	0.156812	0.562697	0.810213	999919276	34372	8.0724e-05	3.43736e-05	7.81251e-05	3.32147e-05	7.87049e-05	3.34733e-05	7.91676e-05	3.36772e-05	7.95613e-05	3.38492e-05	0.207518
43	0.156815	0.562687	0.812001	999872928	46348	0.000127072	4.63517e-05	0.000122828	4.47063e-05	0.000123776	4.5075e-05	0.000124526	4.53619e-05	0.000125158	4.56006e-05	0.209809
44	0.156819	0.562675	0.809992	999813017	59911	0.000186983	5.99186e-05	0.000180498	5.76771e-05	0.000181952	5.81828e-05	0.000183089	5.8571e-05	0.000184041	5.88898e-05	0.211608
45	0.156823	0.562659	0.810889	999738447	74570	0.000261553	7.45839e-05	0.000252123	7.16394e-05	0.000254249	7.23114e-05	0.000255894	7.28182e-05	0.000257256	7.32291e-05	0.211169
46	0.156829	0.56264	0.812075	999646207	92240	0.000353793	9.22641e-05	0.000340514	8.84139e-05	0.000343534	8.93075e-05	0.000345837	8.99663e-05	0.000347725	9.04931e-05	0.213584
47	0.156836	0.562617	0.812233	999533220	112987	0.00046678	0.000113027	0.00044851	0.000108034	0.000452711	0.000109216	0.000455865	0.000110067	0.000458423	0.000110737	0.217123
48	0.156845	0.562589	0.809355	999396891	136329	0.000603109	0.000136393	0.000578453	0.000130004	0.000584201	0.000131551	0.000588438	0.000132636	0.000591841	0.00013348	0.219944
49	0.156855	0.562556	0.812034	999234837	162054	0.000765163	0.000162152	0.000732444	0.000154083	0.000740192	0.000156086	0.000745798	0.000157454	0.00075025	0.000158505	0.221533
50	0.156866	0.562516	0.811357	999043625	191212	0.000956375	0.000191358	0.000913529	0.000181224	0.000923855	0.000183804	0.000931184	0.000185528	0.000936935	0.000186828	0.223164
51	0.15688	0.56247	0.810962	998817756	225869	0.00118224	0.000226085	0.00112664	0.000213319	0.0011403	0.000216651	0.00114981	0.00021884	0.00115718	0.000220455	0.226473
52	0.156897	0.562415	0.811029	998552061	265695	0.00144794	0.000266009	0.00137631	0.000249965	0.00139426	0.000254259	0.00140655	0.000257041	0.00141592	0.000259043	0.230091
53	0.156916	0.56235	0.811319	998239763	312298	0.00176024	0.000312751	0.00166847	0.000292575	0.00169193	0.000298102	0.00170776	0.000301648	0.00171961	0.000304136	0.234651
54	0.156938	0.562275	0.811466	997876747	363016	0.00212325	0.000363656	0.00200641	0.000338538	0.00203688	0.000345561	0.0020572	0.000350052	0.00207211	0.000353121	0.237599
55	0.156964	0.562188	0.811038	997455216	421531	0.00254478	0.000422428	0.00239674	0.000391162	0.00243609	0.000400056	0.00246209	0.00040575	0.0024808	0.000409557	0.241183
56	0.156995	0.562087	0.810805	996966339	488877	0.00303366	0.000490124	0.00284682	0.00045123	0.00289736	0.000462449	0.00293056	0.000469671	0.00295401	0.000474418	0.2453
57	0.15703	0.56197	0.810491	996399349	566990	0.00360065	0.000568715	0.00336556	0.000520312	0.00343015	0.000534413	0.00347251	0.000543592	0.00350188	0.000549541	0.250217
58	0.15707	0.561835	0.810249	995742157	657192	0.00425784	0.000659567	0.00396274	0.000599342	0.00404495	0.000617018	0.00409892	0.000628673	0.00413574	0.000636152	0.255775
59	0.157117	0.561677	0.810463	994982154	760003	0.00501785	0.000763253	0.0046483	0.000688488	0.00475246	0.000710535	0.0048211	0.000725273	0.00486732	0.0007347	0.261529
60	0.157172	0.561497	0.80983	994107702	874452	0.0058923	0.000878862	0.00543092	0.000786573	0.00556219	0.000813813	0.00564924	0.000832317	0.00570724	0.000844165	0.266718
61	0.157234	0.561288	0.81021	993099899	1007803	0.0069001	0.00101378	0.00632535	0.000899732	0.00649001	0.000933328	0.00660014	0.000956534	0.00667299	0.000971472	0.273119
62	0.157306	0.561047	0.80982	991940022	1159877	0.00805998	0.00116794	0.00734554	0.00102728	0.00755117	0.00106853	0.00769006	0.00109749	0.00778163	0.00111634	0.279955
63	0.157389	0.56077	0.809796	990605663	1334359	0.00939434	0.0013452	0.00850791	0.00117182	0.00876369	0.00122237	0.00893834	0.00125842	0.00905349	0.00128219	0.28754
64	0.157485	0.560451	0.80925	989073469	1532194	0.0109265	0.00154672	0.00982888	0.00133349	0.0101458	0.00139522	0.0103647	0.00143989	0.0105094	0.00146976	0.295499
65	0.157594	0.560084	0.809832	987317019	1756450	0.012683	0.00177585	0.0113265	0.00151416	0.0117178	0.00158937	0.0119912	0.00164441	0.0121729	0.0016818	0.303942
66	0.157719	0.559665	0.808945	985308092	2008927	0.0146919	0.00203473	0.0130192	0.00171441	0.0135007	0.00180584	0.0138407	0.00187327	0.0140684	0.00191984	0.312732
67	0.157863	0.559183	0.808629	983007119	2300973	0.0169929	0.00233528	0.0149332	0.00194264	0.0155246	0.00205403	0.0159458	0.00213653	0.0162306	0.00219443	0.323118
68	0.158027	0.558632	0.80819	980383205	2623914	0.0196168	0.00266927	0.0170861	0.00219002	0.0178103	0.00232523	0.0183301	0.00242554	0.0186852	0.00249708	0.333343
69	0.158215	0.558002	0.807904	977393092	2990113	0.0226069	0.00304994	0.0195028	0.00246515	0.0203882	0.00262948	0.0210273	0.00275119	0.0214688	0.00283928	0.344696
70	0.158429	0.557283	0.807447	973993319	3399773	0.0260067	0.00347841	0.0222064	0.00276607	0.023287	0.00296581	0.0240701	0.00311314	0.0246169	0.00322095	0.356773
71	0.158672	0.556463	0.807054	970137054	3856265	0.0298629	0.00395923	0.025219	0.00309305	0.0265361	0.00333593	0.0274926	0.00351384	0.0281672	0.00364505	0.369629
72	0.158948	0.55553	0.806702	965772128	4364926	0.0342279	0.00449929	0.0285633	0.00344724	0.0301672	0.0037428	0.0313318	0.00395742	0.0321606	0.00411635	0.38351
73	0.15926	0.554472	0.806133	960852779	4919349	0.0391472	0.0050937	0.0322527	0.00382014	0.0342033	0.00417915	0.0356171	0.00443717	0.0366308	0.00462859	0.39768
74	0.159614	0.553273	0.805423	955313304	5539475	0.0446867	0.00576517	0.0363109	0.00422359	0.0386806	0.00465975	0.0403929	0.00497038	0.0416276	0.00520044	0.413641
75	0.160012	0.551919	0.804522	949103677	6209627	0.0508963	0.00650009	0.040745	0.00464149	0.0436186	0.00516894	0.0456874	0.00554221	0.0471852	0.00581752	0.430068
76	0.160458	0.550396	0.803468	942169968	6933709	0.05783	0.00730553	0.0455593	0.00507252	0.0490354	0.00570727	0.0515296	0.00615542	0.0533389	0.0064837	0.447314
77	0.160958	0.548685	0.802458	934455074	7714894	0.0655449	0.00818843	0.0507537	0.00551315	0.0549463	0.00627377	0.0579473	0.00681167	0.0601246	0.00720226	0.465673
78	0.161515	0.54677	0.801353	925907249	8547825	0.0740928	0.00914739	0.0563164	0.00595289	0.061357	0.00686031	0.0649604	0.00750502	0.0675707	0.00796838	0.484957
79	0.162134	0.54463	0.800092	916469038	9438211	0.083531	0.0101935	0.0622319	0.00638886	0.0682715	0.00746779	0.072589	0.00823898	0.0757078	0.0087882	0.505684
80	0.162819	0.542248	0.798941	906101426	10367612	0.0938986	0.0113126	0.0684652	0.00680145	0.0756746	0.0080779	0.0808334	0.00899586	0.0845476	0.00964549	0.527114
81	0.163575	0.539606	0.797212	894763894	11337532	0.105236	0.0125124	0.0749749	0.00718433	0.0835467	0.00868788	0.0896905	0.00977502	0.0941002	0.0105426	0.549674
82	0.164404	0.536688	0.795567	882437915	12325979	0.117562	0.0137757	0.0816987	0.00751456	0.0918456	0.00927496	0.0991344	0.0105546	0.104354	0.0114595	0.572688
83	0.165312	0.533473	0.793586	869087914	13350001	0.130912	0.0151285	0.0885763	0.00779385	0.100533	0.00984528	0.109147	0.011346	0.115307	0.0124123	0.59737
84	0.166297	0.529945	0.79146	854710093	14377821	0.14529	0.0165436	0.0955261	0.00799667	0.109545	0.0103689	0.11968	0.0121199	0.126928	0.0133715	0.622703
85	0.167366	0.526083	0.789216	839297419	15412674	0.160703	0.0180326	0.102466	0.00812019	0.118811	0.0108418	0.130685	0.0128765	0.139184	0.0143397	0.649289
86	0.168517	0.521874	0.786755	822874016	16423403	0.177126	0.019568	0.109302	0.00814402	0.128241	0.0112355	0.142089	0.0135869	0.152015	0.015287	0.676275
87	0.169753	0.517305	0.783814	805458665	17415351	0.194541	0.0211641	0.115941	0.00806848	0.137741	0.0115449	0.153814	0.0142494	0.165358	0.0162154	0.704341
88	0.171071	0.512365	0.780721	787108222	18350443	0.212892	0.0227826	0.122284	0.00787526	0.147195	0.011737	0.165756	0.0148263	0.17912	0.0170864	0.732388
89	0.17247	0.507034	0.777632	767860219	19248003	0.23214	0.0244541	0.128247	0.00757575	0.156499	0.0118204	0.17782	0.0153268	0.193221	0.0179152	0.761585
90	0.173947	0.501305	0.774038	747773386	20086833	0.252227	0.0261595	0.133751	0.00716783	0.165544	0.0117797	0.189897	0.0157279	0.207565	0.0186796	0.791459
91	0.175497	0.495174	0.770105	726938447	20834939	0.273062	0.0278626	0.138726	0.00665318	0.174215	0.0115962	0.20186	0.015998	0.222031	0.0193461	0.821072
92	0.177114	0.488637	0.765749	705434395	21504052	0.294566	0.0295817	0.143128	0.00605522	0.182414	0.0112776	0.21359	0.0161367	0.23651	0.0199169	0.851126
93	0.178791	0.48169	0.761205	683358850	22075545	0.316641	0.0312935	0.146932	0.0053925	0.190044	0.0108172	0.224963	0.0161217	0.250876	0.0203651	0.881079
94	0.180517	0.474336	0.756067	660808070	22550780	0.339192	0.0329999	0.150139	0.00469292	0.197031	0.0102232	0.235863	0.0159512	0.26501	0.020683	0.911098
95	0.182281	0.466579	0.750635	637894807	22913263	0.362105	0.0346746	0.152771	0.0039829	0.203309	0.00950102	0.246181	0.0156142	0.278786	0.0208474	0.940562
96	0.18407	0.458421	0.744863	614714147	23180660	0.385286	0.0363393	0.154872	0.0032938	0.208844	0.00867728	0.255829	0.0151241	0.292096	0.0208651	0.970151
97	0.18587	0.449872	0.738611	591374471	23339676	0.408626	0.0379683	0.156502	0.00265171	0.213622	0.00777193	0.264727	0.0144749	0.304827	0.0207115	0.999235
98	0.187664	0.440949	0.73184	567989040	23385431	0.432011	0.0395442	0.157731	0.00207765	0.217651	0.00681426	0.272811	0.0136692	0.316875	0.0203722	1.02742
99	0.18943	0.431672	0.724638	544673924	23315116	0.455326	0.0410485	0.158631	0.00158427	0.220967	0.00583751	0.280033	0.0127166	0.328145	0.0198416	1.05429
100	0.191149	0.422062	0.716896	521528287	23145637	0.478472	0.0424945	0.159272	0.00117773	0.223626	0.00488113	0.286375	0.0116437	0.338567	0.0191355	1.08022
101	0.192796	0.412147	0.708522	498644566	22883721	0.501355	0.0438782	0.159718	0.000854308	0.2257	0.00397712	0.29184	0.0104775	0.348091	0.0182617	1.10515
102	0.194351	0.401953	0.699623	476110907	22533659	0.523889	0.0451898	0.160019	0.000603962	0.227274	0.00315606	0.296452	0.00925013	0.356682	0.0172279	1.12884
103	0.195786	0.391518	0.690282	454025859	22085048	0.545974	0.0463864	0.160216	0.000414694	0.228434	0.00243714	0.300258	0.0079933	0.364316	0.0160344	1.15024
104	0.197078	0.380876	0.68029	432454993	21570866	0.567545	0.0475102	0.160342	0.000276272	0.229266	0.00183366	0.303326	0.00675643	0.370999	0.0147184	1.1704
105	0.198196	0.370069	0.669508	411459533	20995460	0.58854	0.0485495	0.160419	0.000178177	0.229848	0.00134555	0.305737	0.00557663	0.376751	0.0133028	1.18902
106	0.199115	0.359147	0.658192	391110811	20348722	0.608889	0.049455	0.160464	0.000110779	0.230244	0.000962888	0.307582	0.0044826	0.38161	0.0118091	1.2049
107	0.199806	0.348159	0.646269	371464082	19646729	0.628536	0.0502332	0.16049	6.60566e-05	0.230507	0.000671366	0.308954	0.00350828	0.385632	0.0102825	1.2182
108	0.200245	0.337144	0.633707	352540584	18923498	0.647459	0.050943	0.160504	3.79525e-05	0.230676	0.00045543	0.309948	0.00267655	0.388893	0.0087785	1.23032
109	0.20041	0.326155	0.620479	334373980	18166604	0.665626	0.0515305	0.160511	2.06122e-05	0.230782	0.00029965	0.310649	0.00198882	0.391476	0.00732816	1.23995
110	0.200282	0.315251	0.606546	317000713	17373267	0.682999	0.0519576	0.160515	1.06513e-05	0.230846	0.000190684	0.311131	0.00144	0.393472	0.00596811	1.24616
111	0.199844	0.304476	0.591989	300420042	16580671	0.69958	0.0523048	0.160517	5.23048e-06	0.230883	0.000117163	0.311453	0.00101838	0.394975	0.00474091	1.25086
112	0.199082	0.293878	0.576927	284641233	15778809	0.715359	0.0525225	0.160517	2.36351e-06	0.230904	6.90671e-05	0.311664	0.000701963	0.396077	0.00366817	1.25283
113	0.197987	0.283491	0.561465	269652826	14988407	0.730347	0.0526572	0.160518	1.05314e-06	0.230915	3.92296e-05	0.311798	0.000470755	0.396864	0.00276661	1.25318
114	0.196561	0.273366	0.545488	255457741	14195085	0.744542	0.0526421	0.160518	2.6321e-07	0.23092	2.10568e-05	0.311881	0.000306114	0.397412	0.00203172	1.25028
115	0.194806	0.26353	0.529116	242028911	13428830	0.757971	0.0525677	0.160518	0	0.230923	1.07764e-05	0.31193	0.000192924	0.397784	0.00145691	1.24626
116	0.192739	0.254027	0.51205	229347994	12680917	0.770652	0.0523942	0.160518	0	0.230924	5.23942e-06	0.311959	0.000117363	0.398031	0.00102012	1.24017
117	0.190374	0.244881	0.49494	217397137	11950857	0.782603	0.052108	0.160518	0	0.230925	2.34486e-06	0.311974	6.8522e-05	0.398191	0.000696423	1.23164
118	0.187735	0.236108	0.477562	206137139	11259998	0.793863	0.0517946	0.160518	0	0.230925	1.03589e-06	0.311983	3.8587e-05	0.398292	0.000463044	1.2227
119	0.184846	0.227721	0.460306	195543165	10593974	0.804457	0.0513928	0.160518	0	0.230925	2.56964e-07	0.311987	2.05571e-05	0.398353	0.000298849	1.21186
120	0.181751	0.219739	0.442683	185582105	9961060	0.814418	0.0509405	0.160518	0	0.230925	0	0.311989	1.04428e-05	0.39839	0.000186952	1.2
