# Supplementary material for: Quantifying the Potential for Future Gene Therapy to Lower Lifetime Risk of Polygenic Late-Onset Diseases
Source: MDPI journal article supplement (doi:10.3390/ijms20133352), 2019-07-08
Supplement: s2 [file s2 › SuppFiles/Results/LODsRareMedium/Stroke/-1.000/IndividualsByBetaDistrib.csv]

nEntry	Beta	nDetrimentalCount	nFractionPopulation	nCumulativeFractionPopulation	nEditsNeeded	nIndividuals
0	-19.8	0	0	1	0	0
1	-19.6	0	0	1	0	0
2	-19.4	0	0	1	0	0
3	-19.2	0	0	1	0	0
4	-19	0	0	1	0	0
5	-18.8	0	0	1	0	0
6	-18.6	0	0	1	0	0
7	-18.4	0	0	1	0	0
8	-18.2	0	0	1	0	0
9	-18	0	0	1	0	0
10	-17.8	0	0	1	0	0
11	-17.6	0	0	1	0	0
12	-17.4	0	0	1	0	0
13	-17.2	0	0	1	0	0
14	-17	0	0	1	0	0
15	-16.8	0	0	1	0	0
16	-16.6	0	0	1	0	0
17	-16.4	0	0	1	0	0
18	-16.2	0	0	1	0	0
19	-16	0	0	1	0	0
20	-15.8	0	0	1	0	0
21	-15.6	0	0	1	0	0
22	-15.4	0	0	1	0	0
23	-15.2	0	0	1	0	0
24	-15	0	0	1	0	0
25	-14.8	0	0	1	0	0
26	-14.6	0	0	1	0	0
27	-14.4	0	0	1	0	0
28	-14.2	0	0	1	0	0
29	-14	0	0	1	0	0
30	-13.8	0	0	1	0	0
31	-13.6	0	0	1	0	0
32	-13.4	0	0	1	0	0
33	-13.2	0	0	1	0	0
34	-13	0	0	1	0	0
35	-12.8	0	0	1	0	0
36	-12.6	0	0	1	0	0
37	-12.4	0	0	1	0	0
38	-12.2	0	0	1	0	0
39	-12	0	0	1	0	0
40	-11.8	0	0	1	0	0
41	-11.6	0	0	1	0	0
42	-11.4	0	0	1	0	0
43	-11.2	0	0	1	0	0
44	-11	0	0	1	0	0
45	-10.8	0	0	1	0	0
46	-10.6	0	0	1	0	0
47	-10.4	0	0	1	0	0
48	-10.2	0	0	1	0	0
49	-10	0	0	1	0	0
50	-9.8	0	0	1	0	0
51	-9.6	0	0	1	0	0
52	-9.4	0	0	1	0	0
53	-9.2	0	0	1	0	0
54	-9	0	0	1	0	0
55	-8.8	0	0	1	0	0
56	-8.6	0	0	1	0	0
57	-8.4	0	0	1	0	0
58	-8.2	0	0	1	0	0
59	-8	0	0	1	0	0
60	-7.8	0	0	1	0	0
61	-7.6	0	0	1	0	0
62	-7.4	0	0	1	0	0
63	-7.2	0	0	1	0	0
64	-7	0	0	1	0	0
65	-6.8	0	0	1	0	0
66	-6.6	0	0	1	0	0
67	-6.4	0	0	1	0	0
68	-6.2	0	0	1	0	0
69	-6	0	0	1	0	0
70	-5.8	0	0	1	0	0
71	-5.6	0	0	1	0	0
72	-5.4	0	0	1	0	0
73	-5.2	0	0	1	0	0
74	-5	0	0	1	0	0
75	-4.8	0	0	1	0	0
76	-4.6	0	0	1	0	0
77	-4.4	0	0	1	0	0
78	-4.2	0	0.000134154	1	0	134154
79	-4	1	0.000248384	0.99986585	0	248384
80	-3.8	1.3067	0.000720521	0.99961746	0	720521
81	-3.6	1.7885	0.001770246	0.99889694	0	1770246
82	-3.4	2.2279	0.001796824	0.99712669	0	1796824
83	-3.2	2.6773	0.004102546	0.99532987	0	4102546
84	-3	2.9501	0.005793408	0.99122732	0	5793408
85	-2.8	3.4596	0.008113506	0.98543392	0	8113506
86	-2.6	3.9003	0.013604702	0.97732041	0	13604702
87	-2.4	4.1601	0.015927124	0.96371571	0	15927124
88	-2.2	4.6618	0.019807663	0.94778858	0	19807663
89	-2	5.0464	0.027831936	0.92798092	0	27831936
90	-1.8	5.343	0.030519531	0.90014899	0	30519531
91	-1.6	5.8367	0.035455852	0.86962945	0	35455852
92	-1.4	6.1825	0.043650737	0.8341736	0	43650737
93	-1.2	6.5023	0.045256879	0.79052287	0	45256879
94	-1	6.9738	0.04901014	0.74526599	0	49010140
95	-0.8	7.3101	0.05414167	0.69625585	0	54141670
96	-0.6	7.6523	0.05366447	0.64211418	0	53664470
97	-0.4	8.0801	0.055169822	0.58844971	0	55169822
98	-0.2	8.4171	0.056430192	0.53327989	0	56430192
99	0	8.7802	0.053533444	0.47684969	0	53533444
100	0.2	9.1881	0.051742749	0.42331625	0.40794	51742749
101	0.4	9.5252	0.049443433	0.3715735	0.74504	49443433
102	0.6	9.8857	0.045083609	0.32213007	1.1055	45083609
103	0.8	10.289	0.041200396	0.27704646	1.5092	41200396
104	1	10.632	0.037670369	0.23584606	1.8522	37670369
105	1.2	10.989	0.033060058	0.19817569	2.2093	33060058
106	1.4	11.372	0.02903276	0.16511564	2.5919	29032760
107	1.6	11.726	0.025087233	0.13608287	2.9458	25087233
108	1.8	12.081	0.02127391	0.11099564	3.3013	21273910
109	2	12.458	0.018051303	0.089721732	3.678	18051303
110	2.2	12.804	0.01500382	0.071670429	4.0238	15003820
111	2.4	13.168	0.012227881	0.056666609	4.3874	12227881
112	2.6	13.543	0.009922924	0.044438728	4.7632	9922924
113	2.8	13.895	0.007986005	0.034515804	5.1146	7986005
114	3	14.249	0.006325321	0.026529799	5.4692	6325321
115	3.2	14.626	0.004946713	0.020204478	5.8457	4946713
116	3.4	14.961	0.003833855	0.015257765	6.181	3833855
117	3.6	15.329	0.002958206	0.01142391	6.5489	2958206
118	3.8	15.692	0.002247098	0.008465704	6.912	2247098
119	4	16.044	0.001692197	0.006218606	7.2634	1692197
120	4.2	16.398	0.001256982	0.004526409	7.6177	1256982
121	4.4	16.764	0.000930833	0.003269427	7.984	930833
122	4.6	17.116	0.000675825	0.002338594	8.3353	675825
123	4.8	17.474	0.000493036	0.001662769	8.6937	493036
124	5	17.832	0.000353369	0.001169733	9.0517	353369
125	5.2	18.187	0.000251494	0.000816364	9.4066	251494
126	5.4	18.541	0.000176592	0.00056487	9.7613	176592
127	5.6	18.897	0.000123624	0.000388278	10.116	123624
128	5.8	19.244	8.5582e-05	0.000264654	10.464	85582
129	6	19.594	5.896e-05	0.000179072	10.814	58960
130	6.2	19.95	4.0099e-05	0.000120112	11.17	40099
131	6.4	20.323	2.7066e-05	8.0013e-05	11.543	27066
132	6.6	20.665	1.8073e-05	5.2947e-05	11.885	18073
133	6.8	21.021	1.2075e-05	3.4874e-05	12.241	12075
134	7	21.372	8.103e-06	2.2799e-05	12.592	8103
135	7.2	21.716	5.268e-06	1.4696e-05	12.936	5268
136	7.4	22.064	3.445e-06	9.428e-06	13.284	3445
137	7.6	22.476	2.238e-06	5.983e-06	13.696	2238
138	7.8	22.777	1.346e-06	3.745e-06	13.997	1346
139	8	23.086	8.56e-07	2.399e-06	14.306	856
140	8.2	23.533	5.8e-07	1.543e-06	14.753	580
141	8.4	23.883	3.76e-07	9.63e-07	15.103	376
142	8.6	24.142	2.39e-07	5.87e-07	15.362	239
143	8.8	24.576	1.51e-07	3.48e-07	15.796	151
144	9	24.854	8.2e-08	1.97e-07	16.073	82
145	9.2	25.222	5.4e-08	1.15e-07	16.442	54
146	9.4	25.591	2.2e-08	6.1e-08	16.811	22
147	9.6	25.556	1.8e-08	3.9e-08	16.775	18
148	9.8	26.444	9e-09	2.1e-08	17.664	9
149	10	26.857	7e-09	1.2e-08	18.077	7
150	10.2	26.5	4e-09	5e-09	17.72	4
151	10.4	0	0	1e-09	0	0
152	10.6	0	0	1e-09	0	0
153	10.8	26	1e-09	1e-09	17.22	1
154	11	0	0	0	0	0
155	11.2	0	0	0	0	0
156	11.4	0	0	0	0	0
157	11.6	0	0	0	0	0
158	11.8	0	0	0	0	0
159	12	0	0	0	0	0
160	12.2	0	0	0	0	0
161	12.4	0	0	0	0	0
162	12.6	0	0	0	0	0
163	12.8	0	0	0	0	0
164	13	0	0	0	0	0
165	13.2	0	0	0	0	0
166	13.4	0	0	0	0	0
167	13.6	0	0	0	0	0
168	13.8	0	0	0	0	0
169	14	0	0	0	0	0
170	14.2	0	0	0	0	0
171	14.4	0	0	0	0	0
172	14.6	0	0	0	0	0
173	14.8	0	0	0	0	0
174	15	0	0	0	0	0
175	15.2	0	0	0	0	0
176	15.4	0	0	0	0	0
177	15.6	0	0	0	0	0
178	15.8	0	0	0	0	0
179	16	0	0	0	0	0
180	16.2	0	0	0	0	0
181	16.4	0	0	0	0	0
182	16.6	0	0	0	0	0
183	16.8	0	0	0	0	0
184	17	0	0	0	0	0
185	17.2	0	0	0	0	0
186	17.4	0	0	0	0	0
187	17.6	0	0	0	0	0
188	17.8	0	0	0	0	0
189	18	0	0	0	0	0
190	18.2	0	0	0	0	0
191	18.4	0	0	0	0	0
192	18.6	0	0	0	0	0
193	18.8	0	0	0	0	0
194	19	0	0	0	0	0
195	19.2	0	0	0	0	0
196	19.4	0	0	0	0	0
197	19.6	0	0	0	0	0
198	19.8	0	0	0	0	0
199	20	0	0	0	0	0
