# Supplementary material for: Quantifying the Potential for Future Gene Therapy to Lower Lifetime Risk of Polygenic Late-Onset Diseases
Source: MDPI journal article supplement (doi:10.3390/ijms20133352), 2019-07-08
Supplement: s2 [file s2 › SuppFiles/Results/LODsRareMedium/Stroke/0.250/FrailtyAnalysis.csv]

Age	Heritability	MeanOR	CaseOR	nControls	nCases	nCumIncidence	nIncidence	nLifeIncidence0	nAbsIncidence0	nLifeIncidence5	nAbsIncidence5	nLifeIncidence10	nAbsIncidence10	nLifeIncidence15	nAbsIncidence15	nIncActDivExp
39	0.386696	0.24997	3.50003	999991450	8550	8.55e-06	8.55e-06	8.30231e-06	8.30231e-06	8.35771e-06	8.35771e-06	8.4032e-06	8.4032e-06	8.44265e-06	8.44265e-06	0.249367
40	0.386678	0.249958	3.60317	999973104	18346	2.6896e-05	1.83462e-05	2.60893e-05	1.7787e-05	2.62694e-05	1.79117e-05	2.64159e-05	1.80127e-05	2.65422e-05	1.80995e-05	0.251427
41	0.386651	0.249938	3.44383	999943376	29728	5.6624e-05	2.97288e-05	5.48647e-05	2.87754e-05	5.5257e-05	2.89876e-05	5.55733e-05	2.91574e-05	5.5844e-05	2.93018e-05	0.255073
42	0.386611	0.249911	3.50091	999901601	41775	9.8399e-05	4.17774e-05	9.52312e-05	4.03666e-05	9.59379e-05	4.06809e-05	9.6502e-05	4.09286e-05	9.69817e-05	4.11377e-05	0.252215
43	0.386559	0.249874	3.479	999845423	56178	0.000154577	5.61835e-05	0.000149415	5.41837e-05	0.000150568	5.46306e-05	0.00015148	5.49783e-05	0.000152249	5.52676e-05	0.254312
44	0.386493	0.249826	3.45482	999773002	72421	0.000226998	7.24322e-05	0.000219127	6.97117e-05	0.000220891	7.0323e-05	0.000222273	7.07923e-05	0.000223427	7.11775e-05	0.255801
45	0.386411	0.249767	3.42011	999682507	90495	0.000317493	9.05155e-05	0.000306049	8.69223e-05	0.000308629	8.77376e-05	0.000310625	8.83525e-05	0.000312278	8.88512e-05	0.256276
46	0.38631	0.249694	3.42269	999571489	111018	0.000428511	0.000111053	0.000412434	0.000106385	0.000416089	0.00010746	0.000418878	0.000108253	0.000421165	0.000108887	0.25708
47	0.386189	0.249607	3.34575	999435792	135697	0.000564208	0.000135755	0.000542137	0.000129703	0.000547211	0.000131122	0.000551021	0.000132143	0.000554113	0.000132948	0.260783
48	0.386046	0.249502	3.31059	999273784	162008	0.000726216	0.000162099	0.000696556	0.00015442	0.000703468	0.000156257	0.000708567	0.000157545	0.000712661	0.000158548	0.261398
49	0.385877	0.249378	3.29751	999081382	192402	0.000918618	0.000192542	0.000879384	0.000182828	0.000888672	0.000185204	0.000895395	0.000186828	0.000900736	0.000188075	0.263052
50	0.385681	0.249233	3.22714	998854499	226883	0.0011455	0.000227092	0.00109425	0.000214867	0.0011066	0.000217926	0.00111536	0.00021997	0.00112225	0.000221512	0.264836
51	0.385455	0.249064	3.19251	998588732	265767	0.00141127	0.000266072	0.00134501	0.00025076	0.00136127	0.000254677	0.00137262	0.00025725	0.0013814	0.000259148	0.266529
52	0.385193	0.248867	3.14734	998278089	310643	0.00172191	0.000311082	0.00163692	0.000291907	0.00165819	0.00029692	0.00167278	0.00030017	0.0016839	0.000302507	0.269078
53	0.384894	0.24864	3.09074	997916794	361295	0.00208321	0.000361918	0.00197491	0.000337988	0.00200257	0.000344372	0.00202125	0.000348469	0.00203525	0.000351343	0.27154
54	0.384555	0.24838	3.01871	997497993	418801	0.00250201	0.000419675	0.00236478	0.000389874	0.00240053	0.000397961	0.00242439	0.000403134	0.00244191	0.000406668	0.274199
55	0.384168	0.248081	2.97939	997014318	483675	0.00298568	0.000484888	0.00281266	0.000447876	0.00285859	0.00045806	0.00288897	0.00046458	0.00291085	0.000468937	0.276844
56	0.38373	0.24774	2.90895	996457355	556963	0.00354265	0.000558631	0.00332542	0.000512765	0.0033841	0.000525514	0.00342269	0.000533721	0.00344997	0.000539115	0.279586
57	0.383238	0.247352	2.84804	995818877	638478	0.00418112	0.000640748	0.00390956	0.000584137	0.00398407	0.000599968	0.00403296	0.000610273	0.00406692	0.000616952	0.28191
58	0.382686	0.246912	2.77429	995086732	732145	0.00491327	0.000735219	0.00457485	0.000665293	0.00466898	0.000684914	0.00473081	0.000697851	0.00477307	0.000706154	0.285112
59	0.382066	0.246414	2.70726	994246824	839908	0.00575318	0.000844055	0.00533249	0.000757635	0.00545088	0.000781896	0.00552893	0.000798114	0.00558156	0.000808487	0.289215
60	0.381374	0.245851	2.63625	993288500	958324	0.0067115	0.000963869	0.00619018	0.00085769	0.00633827	0.000887394	0.0064365	0.000907571	0.00650205	0.000920489	0.292516
61	0.380602	0.245216	2.57193	992196445	1092055	0.00780356	0.00109943	0.00715938	0.000969204	0.00734367	0.00100539	0.00746689	0.00103039	0.00754853	0.00104648	0.296195
62	0.379746	0.244505	2.49684	990956132	1240313	0.00904387	0.00125007	0.00825032	0.00109094	0.00847842	0.00113475	0.00863239	0.0011655	0.00873405	0.00118552	0.299642
63	0.378797	0.243707	2.42447	989546783	1409349	0.0104532	0.00142221	0.00947802	0.0012277	0.00975908	0.00128066	0.00995083	0.00131843	0.0100774	0.00134334	0.304001
64	0.377752	0.242819	2.34417	987952812	1593971	0.0120472	0.00161081	0.0108522	0.00137423	0.0111969	0.00143783	0.0114347	0.00148388	0.011592	0.00151466	0.307742
65	0.376601	0.24183	2.26709	986151651	1801161	0.0138483	0.00182312	0.012388	0.00153573	0.0128089	0.00161202	0.0131025	0.00166785	0.0132978	0.00170577	0.312033
66	0.375336	0.240732	2.19612	984120853	2030798	0.0158791	0.00205932	0.0140991	0.00171109	0.0146113	0.00180234	0.0149722	0.00186964	0.0152139	0.00191613	0.31651
67	0.373954	0.239517	2.11415	981835000	2285853	0.018165	0.00232274	0.0160006	0.00190152	0.0166218	0.00201056	0.0170635	0.0020913	0.0173619	0.00214798	0.321382
68	0.372449	0.23818	2.04042	979276053	2558947	0.0207239	0.00260629	0.0181001	0.0020995	0.018851	0.00222912	0.0193888	0.00232529	0.0197558	0.00239387	0.325478
69	0.370811	0.236709	1.96396	976408496	2867557	0.0235915	0.00292824	0.0204178	0.00231773	0.0213232	0.00247224	0.0219755	0.00258667	0.0224253	0.00266949	0.330941
70	0.36904	0.235101	1.88545	973212628	3195868	0.0267874	0.00327308	0.0229592	0.00254139	0.0240481	0.00272491	0.0248357	0.00286027	0.0253846	0.00295933	0.335713
71	0.367126	0.233347	1.80939	969654081	3558547	0.0303459	0.00365649	0.0257392	0.00278003	0.0270464	0.00299832	0.027994	0.00315823	0.0286608	0.00327616	0.341366
72	0.365073	0.231446	1.73421	965715725	3938356	0.0342843	0.00406161	0.0287567	0.00301747	0.0303226	0.00327618	0.031458	0.00346404	0.0322639	0.00360316	0.346203
73	0.362873	0.229392	1.66149	961366715	4349010	0.0386333	0.00450341	0.0320183	0.00326165	0.0338908	0.00356817	0.0352465	0.00378847	0.0362158	0.0039519	0.351594
74	0.360526	0.22718	1.58961	956580332	4786383	0.0434197	0.00497873	0.0355249	0.00350653	0.0377594	0.00386864	0.039373	0.00412653	0.0405334	0.00431753	0.357215
75	0.358036	0.224814	1.51804	951335313	5245019	0.0486647	0.00548309	0.0392702	0.00374528	0.0419303	0.00417089	0.0438451	0.00447209	0.0452276	0.00469424	0.362779
76	0.355403	0.222293	1.45019	945614812	5720501	0.0543852	0.00601313	0.0432421	0.00397197	0.0463993	0.004469	0.048665	0.00481992	0.0503046	0.00507697	0.368181
77	0.352629	0.219618	1.38211	939392534	6222278	0.0606075	0.00658014	0.0474315	0.00418937	0.0511667	0.00476735	0.0538411	0.0051761	0.0557775	0.0054729	0.37421
78	0.349724	0.2168	1.31588	932663237	6729297	0.0673368	0.00716346	0.0518108	0.00437926	0.0562135	0.0050468	0.0593622	0.00552109	0.0616394	0.00586196	0.379777
79	0.346687	0.213839	1.25412	925413687	7249550	0.0745863	0.00777296	0.0563545	0.00454373	0.0615245	0.00531106	0.0652217	0.00585952	0.0678896	0.00625013	0.385606
80	0.343529	0.210745	1.19381	917635971	7777716	0.082364	0.00840458	0.0610307	0.0046762	0.0670783	0.00555379	0.0714066	0.00618492	0.0745211	0.00663155	0.391615
81	0.340259	0.207531	1.13493	909335753	8300218	0.0906642	0.00904522	0.0657965	0.00476578	0.0728415	0.00576317	0.077891	0.00648434	0.0815146	0.00699351	0.397359
82	0.336894	0.204211	1.07832	900523339	8812414	0.0994767	0.00969105	0.0706036	0.00480713	0.0787748	0.00593327	0.0846428	0.00675185	0.0888454	0.00733074	0.40288
83	0.333437	0.200793	1.02513	891199652	9323687	0.1088	0.0103536	0.0754069	0.00480333	0.0848424	0.00606762	0.0916353	0.00699253	0.096495	0.00764967	0.408826
84	0.329906	0.197296	0.974108	881393144	9806508	0.118607	0.0110037	0.0801471	0.00474017	0.0909887	0.00614633	0.0988196	0.0071843	0.104421	0.00792621	0.414182
85	0.326308	0.193729	0.925513	871111969	10281175	0.128888	0.0116647	0.0847768	0.00462966	0.0971701	0.00618135	0.106161	0.00734143	0.112597	0.00817569	0.420002
86	0.322661	0.190113	0.878776	860391211	10720758	0.139609	0.012307	0.0892386	0.00446187	0.103326	0.00615559	0.113605	0.00744385	0.120972	0.00837532	0.425332
87	0.318976	0.18646	0.835135	849256791	11134420	0.150743	0.0129411	0.0934835	0.00424483	0.109399	0.00607377	0.121102	0.00749664	0.129503	0.00853091	0.430681
88	0.31526	0.182783	0.79368	837736888	11519903	0.162263	0.0135647	0.0974655	0.00398208	0.115334	0.00593477	0.128598	0.00749686	0.138143	0.00863964	0.436061
89	0.311528	0.179095	0.754666	825867070	11869818	0.174133	0.0141689	0.101143	0.00367721	0.121072	0.00573751	0.136038	0.00743953	0.146839	0.00869589	0.441269
90	0.307787	0.175411	0.717784	813683553	12183517	0.186316	0.0147524	0.104481	0.00333834	0.126558	0.0054863	0.143363	0.0073251	0.155539	0.00869982	0.446336
91	0.30405	0.171741	0.682871	801220067	12463486	0.19878	0.0153174	0.107457	0.00297609	0.131745	0.00518718	0.150519	0.00715622	0.164192	0.0086539	0.451381
92	0.300332	0.168101	0.64953	788521731	12698336	0.211478	0.0158487	0.110056	0.00259929	0.136586	0.00484105	0.157446	0.00692688	0.172742	0.0085496	0.456001
93	0.29663	0.164494	0.61943	775623081	12898650	0.224377	0.016358	0.112279	0.0022227	0.141045	0.00445868	0.164091	0.00664506	0.181136	0.00839412	0.460565
94	0.292961	0.160932	0.589811	762547997	13075084	0.237452	0.0168575	0.114139	0.00185941	0.145095	0.0040506	0.170411	0.0063201	0.189331	0.00819494	0.465421
95	0.289325	0.157419	0.562602	749334737	13213260	0.250665	0.0173278	0.115656	0.00151774	0.148716	0.0036205	0.176361	0.00595	0.197275	0.00794421	0.470023
96	0.28573	0.153965	0.537017	736028231	13306506	0.263972	0.0177578	0.116862	0.0012061	0.151893	0.00317739	0.181899	0.00553803	0.204916	0.00764026	0.474079
97	0.282185	0.150574	0.512457	722642602	13385629	0.277357	0.0181863	0.117797	0.000934852	0.154633	0.00273997	0.187002	0.00510307	0.212217	0.00730179	0.47862
98	0.278689	0.147251	0.489914	709226827	13415775	0.290773	0.0185649	0.118502	0.000704865	0.156945	0.00231181	0.19164	0.00463743	0.219129	0.00691147	0.482345
99	0.275246	0.143997	0.468435	695793342	13433485	0.304207	0.018941	0.119021	0.000518465	0.158856	0.00191038	0.195801	0.00416163	0.225622	0.00649334	0.48648
100	0.271862	0.140819	0.448365	682383752	13409590	0.317616	0.0192724	0.119392	0.000371647	0.160396	0.00154029	0.199476	0.00367429	0.231661	0.00603841	0.48991
101	0.268534	0.137714	0.429422	669008698	13375054	0.330991	0.0196005	0.119653	0.000260412	0.161608	0.00121231	0.20267	0.00319376	0.237227	0.00556656	0.493675
102	0.265266	0.134684	0.411726	655687498	13321200	0.344313	0.0199118	0.119831	0.000178038	0.162539	0.000930353	0.205396	0.00272678	0.242306	0.00507851	0.497399
103	0.262056	0.13173	0.394955	642443409	13244089	0.357557	0.0201988	0.119949	0.000118402	0.163234	0.000695844	0.207679	0.00228222	0.246884	0.00457808	0.500867
104	0.25891	0.128854	0.379043	629300404	13143005	0.3707	0.0204578	0.120026	7.64266e-05	0.163742	0.000507254	0.209548	0.00186907	0.250955	0.00407164	0.503972
105	0.255823	0.126053	0.364084	616262915	13037489	0.383737	0.0207174	0.120073	4.78476e-05	0.164103	0.000361334	0.211045	0.00149755	0.254528	0.00357234	0.507389
106	0.252797	0.123327	0.349989	603343552	12919363	0.396656	0.020964	0.120102	2.89394e-05	0.164354	0.00025154	0.212216	0.00117101	0.257613	0.00308495	0.51076
107	0.249832	0.120676	0.336906	590574524	12769028	0.409425	0.0211638	0.120119	1.67913e-05	0.164525	0.000170658	0.213108	0.000891789	0.260226	0.00261376	0.51324
108	0.246927	0.118098	0.32433	577951168	12623356	0.422049	0.0213747	0.120129	9.4044e-06	0.164638	0.000112853	0.213771	0.000663231	0.262402	0.00217526	0.51622
109	0.244083	0.115592	0.312298	565478812	12472356	0.434521	0.0215803	0.120134	4.98894e-06	0.164711	7.25268e-05	0.214253	0.000481371	0.264175	0.00177369	0.519276
110	0.241296	0.113157	0.301192	553179181	12299631	0.446821	0.0217508	0.120136	2.52142e-06	0.164756	4.51396e-05	0.214593	0.000340884	0.265588	0.0014128	0.521675
111	0.238567	0.11079	0.290414	541046393	12132788	0.458954	0.0219328	0.120137	1.21328e-06	0.164783	2.71774e-05	0.21483	0.000236225	0.266688	0.00109972	0.524518
112	0.235894	0.108492	0.280357	529098498	11947895	0.470902	0.0220829	0.120138	5.37655e-07	0.164799	1.57115e-05	0.214989	0.000159684	0.267522	0.000834441	0.526749
113	0.233275	0.106258	0.270931	517339140	11759358	0.482661	0.0222253	0.120138	2.35187e-07	0.164807	8.76072e-06	0.215094	0.000105129	0.26814	0.000617837	0.528934
114	0.230712	0.104088	0.261686	505761199	11577941	0.494239	0.0223798	0.120138	5.78897e-08	0.164812	4.63118e-06	0.215162	6.73257e-05	0.268587	0.000446851	0.531531
115	0.228205	0.101982	0.253005	494380250	11380949	0.50562	0.0225026	0.120138	0	0.164814	2.33309e-06	0.215204	4.17681e-05	0.268902	0.000315423	0.533486
116	0.22575	0.099933	0.244741	483179701	11200549	0.51682	0.0226557	0.120138	0	0.164815	1.12005e-06	0.215229	2.50892e-05	0.26912	0.000218075	0.536259
117	0.223341	0.0979435	0.236959	472182088	10997613	0.527818	0.0227609	0.120138	0	0.164816	4.94893e-07	0.215243	1.44619e-05	0.269267	0.000146983	0.537985
118	0.220985	0.0960096	0.229614	461382854	10799234	0.538617	0.0228709	0.120138	0	0.164816	2.15985e-07	0.215251	8.04543e-06	0.269364	9.65452e-05	0.539905
119	0.218673	0.0941281	0.222454	450765380	10617474	0.549235	0.0230123	0.120138	0	0.164816	5.30874e-08	0.215255	4.24699e-06	0.269426	6.17406e-05	0.542637
120	0.21641	0.0923014	0.215637	440354923	10410457	0.559645	0.0230951	0.120138	0	0.164816	0	0.215258	2.13414e-06	0.269464	3.82064e-05	0.544051
