# Supplementary material for: Quantifying the Potential for Future Gene Therapy to Lower Lifetime Risk of Polygenic Late-Onset Diseases
Source: MDPI journal article supplement (doi:10.3390/ijms20133352), 2019-07-08
Supplement: s2 [file s2 › SuppFiles/Results/LODsRareMedium/Stroke/0.250/IndividualsByBetaDistrib.csv]

nEntry	Beta	nDetrimentalCount	nFractionPopulation	nCumulativeFractionPopulation	nEditsNeeded	nIndividuals
0	-19.8	0	0	1	0	0
1	-19.6	0	0	1	0	0
2	-19.4	0	0	1	0	0
3	-19.2	0	0	1	0	0
4	-19	0	0	1	0	0
5	-18.8	0	0	1	0	0
6	-18.6	0	0	1	0	0
7	-18.4	0	0	1	0	0
8	-18.2	0	0	1	0	0
9	-18	0	0	1	0	0
10	-17.8	0	0	1	0	0
11	-17.6	0	0	1	0	0
12	-17.4	0	0	1	0	0
13	-17.2	0	0	1	0	0
14	-17	0	0	1	0	0
15	-16.8	0	0	1	0	0
16	-16.6	0	0	1	0	0
17	-16.4	0	0	1	0	0
18	-16.2	0	0	1	0	0
19	-16	0	0	1	0	0
20	-15.8	0	0	1	0	0
21	-15.6	0	0	1	0	0
22	-15.4	0	0	1	0	0
23	-15.2	0	0	1	0	0
24	-15	0	0	1	0	0
25	-14.8	0	0	1	0	0
26	-14.6	0	0	1	0	0
27	-14.4	0	0	1	0	0
28	-14.2	0	0	1	0	0
29	-14	0	0	1	0	0
30	-13.8	0	0	1	0	0
31	-13.6	0	0	1	0	0
32	-13.4	0	0	1	0	0
33	-13.2	0	0	1	0	0
34	-13	0	0	1	0	0
35	-12.8	0	0	1	0	0
36	-12.6	0	0	1	0	0
37	-12.4	0	0	1	0	0
38	-12.2	0	0	1	0	0
39	-12	0	0	1	0	0
40	-11.8	0	0	1	0	0
41	-11.6	0	0	1	0	0
42	-11.4	0	0	1	0	0
43	-11.2	0	0	1	0	0
44	-11	0	0	1	0	0
45	-10.8	0	0	1	0	0
46	-10.6	0	0	1	0	0
47	-10.4	0	0	1	0	0
48	-10.2	0	0	1	0	0
49	-10	0	0	1	0	0
50	-9.8	0	0	1	0	0
51	-9.6	0	0	1	0	0
52	-9.4	0	0	1	0	0
53	-9.2	0	0	1	0	0
54	-9	0	0	1	0	0
55	-8.8	0	0	1	0	0
56	-8.6	0	0	1	0	0
57	-8.4	0	0	1	0	0
58	-8.2	0	0	1	0	0
59	-8	0	0	1	0	0
60	-7.8	0	0	1	0	0
61	-7.6	0	0	1	0	0
62	-7.4	0	0	1	0	0
63	-7.2	0	0	1	0	0
64	-7	0	0	1	0	0
65	-6.8	0	0	1	0	0
66	-6.6	0	0	1	0	0
67	-6.4	0	0	1	0	0
68	-6.2	0	0	1	0	0
69	-6	0	0	1	0	0
70	-5.8	0	0	1	0	0
71	-5.6	0	0	1	0	0
72	-5.4	0	0	1	0	0
73	-5.2	0	0	1	0	0
74	-5	0	0	1	0	0
75	-4.8	0	0	1	0	0
76	-4.6	0	0	1	0	0
77	-4.4	0	0	1	0	0
78	-4.2	0	0.000135145	1	0	135145
79	-4	1	0.000250056	0.99986485	0	250056
80	-3.8	1.3066	0.000721353	0.9996148	0	721353
81	-3.6	1.7882	0.001771411	0.99889345	0	1771411
82	-3.4	2.2285	0.001798188	0.99712203	0	1798188
83	-3.2	2.6764	0.004105322	0.99532385	0	4105322
84	-3	2.9497	0.005791127	0.99121852	0	5791127
85	-2.8	3.46	0.008107134	0.9854274	0	8107134
86	-2.6	3.9004	0.013598514	0.97732026	0	13598514
87	-2.4	4.1599	0.015930803	0.96372175	0	15930803
88	-2.2	4.6617	0.019811142	0.94779095	0	19811142
89	-2	5.0466	0.027832725	0.9279798	0	27832725
90	-1.8	5.3429	0.030533899	0.90014708	0	30533899
91	-1.6	5.8369	0.035455084	0.86961318	0	35455084
92	-1.4	6.1827	0.043664422	0.8341581	0	43664422
93	-1.2	6.5023	0.04525234	0.79049368	0	45252340
94	-1	6.9737	0.049011078	0.74524134	0	49011078
95	-0.8	7.3102	0.054144383	0.69623026	0	54144383
96	-0.6	7.6522	0.053675115	0.64208587	0	53675115
97	-0.4	8.08	0.05516187	0.58841076	0	55161870
98	-0.2	8.4172	0.05643645	0.53324889	0	56436450
99	0	8.78	0.053546393	0.47681244	0	53546393
100	0.2	9.188	0.051734517	0.42326605	0.40804	51734517
101	0.4	9.5255	0.049437145	0.37153153	0.74551	49437145
102	0.6	9.8859	0.045073183	0.32209438	1.1059	45073183
103	0.8	10.289	0.041206464	0.2770212	1.5095	41206464
104	1	10.632	0.037676559	0.23581474	1.852	37676559
105	1.2	10.989	0.033057478	0.19813818	2.2092	33057478
106	1.4	11.372	0.02902612	0.1650807	2.5922	29026120
107	1.6	11.726	0.025089178	0.13605458	2.9461	25089178
108	1.8	12.082	0.021265316	0.1109654	3.3017	21265316
109	2	12.458	0.018054345	0.089700086	3.6784	18054345
110	2.2	12.805	0.015003058	0.071645741	4.0246	15003058
111	2.4	13.168	0.012221183	0.056642683	4.3884	12221183
112	2.6	13.543	0.009925226	0.0444215	4.7632	9925226
113	2.8	13.895	0.007986865	0.034496274	5.1147	7986865
114	3	14.249	0.006319056	0.026509409	5.4694	6319056
115	3.2	14.627	0.004945048	0.020190353	5.8466	4945048
116	3.4	14.96	0.003828469	0.015245305	6.1802	3828469
117	3.6	15.331	0.00295891	0.011416836	6.5508	2958910
118	3.8	15.692	0.002246509	0.008457926	6.9122	2246509
119	4	16.045	0.001692625	0.006211417	7.2648	1692625
120	4.2	16.398	0.001252341	0.004518792	7.6181	1252341
121	4.4	16.762	0.000929561	0.003266451	7.982	929561
122	4.6	17.116	0.000676302	0.00233689	8.3359	676302
123	4.8	17.47	0.000492119	0.001660588	8.6896	492119
124	5	17.83	0.000352656	0.001168469	9.0504	352656
125	5.2	18.184	0.000251211	0.000815813	9.4042	251211
126	5.4	18.542	0.000175921	0.000564602	9.7615	175921
127	5.6	18.899	0.000123133	0.000388681	10.119	123133
128	5.8	19.246	8.5808e-05	0.000265548	10.466	85808
129	6	19.606	5.9026e-05	0.00017974	10.826	59026
130	6.2	19.954	4.0241e-05	0.000120714	11.174	40241
131	6.4	20.315	2.7373e-05	8.0473e-05	11.535	27373
132	6.6	20.676	1.8255e-05	5.31e-05	11.896	18255
133	6.8	21.049	1.2193e-05	3.4845e-05	12.269	12193
134	7	21.381	7.968e-06	2.2652e-05	12.601	7968
135	7.2	21.749	5.206e-06	1.4684e-05	12.969	5206
136	7.4	22.084	3.46e-06	9.478e-06	13.304	3460
137	7.6	22.407	2.258e-06	6.018e-06	13.627	2258
138	7.8	22.787	1.378e-06	3.76e-06	14.007	1378
139	8	23.141	8.98e-07	2.382e-06	14.361	898
140	8.2	23.518	5.41e-07	1.484e-06	14.738	541
141	8.4	23.833	3.59e-07	9.43e-07	15.053	359
142	8.6	24.297	2.22e-07	5.84e-07	15.517	222
143	8.8	24.692	1.59e-07	3.62e-07	15.912	159
144	9	24.854	8.2e-08	2.03e-07	16.074	82
145	9.2	25.32	5e-08	1.21e-07	16.54	50
146	9.4	26.08	2.5e-08	7.1e-08	17.3	25
147	9.6	25.524	2.1e-08	4.6e-08	16.744	21
148	9.8	26	1.2e-08	2.5e-08	17.22	12
149	10	25.833	6e-09	1.3e-08	17.053	6
150	10.2	27.25	4e-09	7e-09	18.47	4
151	10.4	28.333	3e-09	3e-09	19.553	3
152	10.6	0	0	0	0	0
153	10.8	0	0	0	0	0
154	11	0	0	0	0	0
155	11.2	0	0	0	0	0
156	11.4	0	0	0	0	0
157	11.6	0	0	0	0	0
158	11.8	0	0	0	0	0
159	12	0	0	0	0	0
160	12.2	0	0	0	0	0
161	12.4	0	0	0	0	0
162	12.6	0	0	0	0	0
163	12.8	0	0	0	0	0
164	13	0	0	0	0	0
165	13.2	0	0	0	0	0
166	13.4	0	0	0	0	0
167	13.6	0	0	0	0	0
168	13.8	0	0	0	0	0
169	14	0	0	0	0	0
170	14.2	0	0	0	0	0
171	14.4	0	0	0	0	0
172	14.6	0	0	0	0	0
173	14.8	0	0	0	0	0
174	15	0	0	0	0	0
175	15.2	0	0	0	0	0
176	15.4	0	0	0	0	0
177	15.6	0	0	0	0	0
178	15.8	0	0	0	0	0
179	16	0	0	0	0	0
180	16.2	0	0	0	0	0
181	16.4	0	0	0	0	0
182	16.6	0	0	0	0	0
183	16.8	0	0	0	0	0
184	17	0	0	0	0	0
185	17.2	0	0	0	0	0
186	17.4	0	0	0	0	0
187	17.6	0	0	0	0	0
188	17.8	0	0	0	0	0
189	18	0	0	0	0	0
190	18.2	0	0	0	0	0
191	18.4	0	0	0	0	0
192	18.6	0	0	0	0	0
193	18.8	0	0	0	0	0
194	19	0	0	0	0	0
195	19.2	0	0	0	0	0
196	19.4	0	0	0	0	0
197	19.6	0	0	0	0	0
198	19.8	0	0	0	0	0
199	20	0	0	0	0	0
