# Supplementary material for: Quantifying the Potential for Future Gene Therapy to Lower Lifetime Risk of Polygenic Late-Onset Diseases
Source: MDPI journal article supplement (doi:10.3390/ijms20133352), 2019-07-08
Supplement: s2 [file s2 › SuppFiles/Results/LODsRareMedium/Stroke/1.000/FrailtyAnalysis.csv]

Age	Heritability	MeanOR	CaseOR	nControls	nCases	nCumIncidence	nIncidence	nLifeIncidence0	nAbsIncidence0	nLifeIncidence5	nAbsIncidence5	nLifeIncidence10	nAbsIncidence10	nLifeIncidence15	nAbsIncidence15	nIncActDivExp
39	0.386698	0.999856	14.1673	999965698	34302	3.4302e-05	3.4302e-05	3.33083e-05	3.33083e-05	3.35305e-05	3.35305e-05	3.3713e-05	3.3713e-05	3.38713e-05	3.38713e-05	1.00044
40	0.38663	0.999664	14.059	999892956	72742	0.000107044	7.27445e-05	0.000103834	7.0528e-05	0.00010455	7.10223e-05	0.000105134	7.14231e-05	0.000105636	7.17672e-05	0.996937
41	0.386524	0.999359	13.839	999776743	116213	0.000223257	0.000116225	0.000216323	0.000112501	0.000217869	0.000113331	0.000219116	0.000113994	0.000220183	0.000114559	0.997215
42	0.386374	0.998927	13.6442	999611569	165174	0.000388431	0.000165211	0.000375928	0.000159641	0.000378717	0.000160884	0.000380944	0.000161864	0.000382837	0.000162691	0.9974
43	0.386178	0.998356	13.3102	999390615	220954	0.000609385	0.00022104	0.000589038	0.000213193	0.000593585	0.000214951	0.000597179	0.00021632	0.000600211	0.000217458	1.00052
44	0.385933	0.997631	13.0835	999108779	281836	0.000891221	0.000282008	0.000860331	0.000271458	0.000867256	0.000273838	0.000872677	0.000275665	0.000877208	0.000277166	0.995936
45	0.385634	0.996734	12.7531	998756230	352549	0.00124377	0.000352863	0.00119896	0.000338932	0.00120906	0.000342112	0.00121688	0.000344509	0.00122335	0.000346454	0.999062
46	0.385274	0.995647	12.4652	998324924	431306	0.00167508	0.000431843	0.00161227	0.000413822	0.00162655	0.000418005	0.00163744	0.000421088	0.00164638	0.000423554	0.999683
47	0.384851	0.994352	12.1893	997806338	518586	0.00219366	0.000519456	0.00210795	0.000496509	0.00212765	0.000501943	0.00214245	0.000505852	0.00215446	0.000508932	0.997866
48	0.384361	0.992829	11.783	997188002	618336	0.002812	0.000619695	0.00269732	0.000590669	0.00272403	0.000597696	0.00274375	0.000602626	0.00275959	0.000606462	0.999306
49	0.383795	0.991051	11.5289	996459940	728062	0.00354006	0.000730115	0.00338915	0.000693785	0.00342486	0.000702801	0.00345072	0.000708964	0.00347128	0.000713695	0.99749
50	0.383148	0.988995	11.1884	995606575	853365	0.00439343	0.000856397	0.00419732	0.000811042	0.00424453	0.000822586	0.00427808	0.000830302	0.00430444	0.000836122	0.998737
51	0.382416	0.986631	10.832	994612372	994203	0.00538763	0.00099859	0.00513539	0.000942205	0.00519725	0.000956919	0.00524043	0.00096659	0.00527388	0.00097372	1.0003
52	0.381592	0.983939	10.4855	993463652	1148720	0.00653635	0.00115494	0.00621482	0.00108528	0.00629522	0.00110392	0.00635042	0.001116	0.00639252	0.00112469	0.998994
53	0.38067	0.980878	10.1435	992138780	1324872	0.00786122	0.00133359	0.00745423	0.00124756	0.00755804	0.00127112	0.00762826	0.00128625	0.0076809	0.00129686	1.00056
54	0.379645	0.977432	9.76814	990622171	1516609	0.00937783	0.00152863	0.00886609	0.00142304	0.00899918	0.00145256	0.00908813	0.00147144	0.00915357	0.00148434	0.998744
55	0.378506	0.973553	9.421	988886298	1735873	0.0111137	0.00175231	0.0104735	0.00162261	0.0106431	0.0016595	0.0107555	0.00168312	0.0108365	0.00169891	1.00047
56	0.377248	0.969207	9.08788	986909646	1976652	0.0130904	0.00199887	0.0122933	0.00184025	0.0125082	0.001886	0.0126496	0.00191545	0.0127499	0.00193481	1.0004
57	0.375866	0.964369	8.71848	984666466	2243180	0.0153335	0.00227293	0.0143455	0.00207948	0.014616	0.00213584	0.0147937	0.00217253	0.0149174	0.0021963	1.00002
58	0.37435	0.958995	8.38047	982128276	2538190	0.0178717	0.00257772	0.016652	0.00234234	0.0169905	0.00241143	0.017213	0.00245698	0.0173655	0.00248621	0.999617
59	0.372693	0.953047	8.03309	979261967	2866309	0.020738	0.00291847	0.0192375	0.00263259	0.0196588	0.00271689	0.0199367	0.00277324	0.0201246	0.00280929	1.00001
60	0.370889	0.946487	7.69585	976034511	3227456	0.0239655	0.0032958	0.022126	0.00294971	0.0226474	0.00305187	0.0229932	0.00312126	0.0232246	0.00316569	1.00021
61	0.368936	0.939294	7.34873	972415074	3619437	0.0275849	0.00370831	0.0253383	0.00329114	0.0259796	0.00341404	0.0264083	0.00349892	0.026693	0.00355356	0.999045
62	0.366816	0.931403	7.03271	968356878	4058196	0.0316431	0.00417332	0.0289078	0.0036707	0.0296924	0.00381813	0.0302217	0.0039216	0.0305719	0.00398896	1.00035
63	0.36453	0.9228	6.69772	963823261	4533617	0.0361767	0.00468176	0.032857	0.00407833	0.0338121	0.00425427	0.0344629	0.00437974	0.0348932	0.00446247	1.00074
64	0.362073	0.913451	6.38377	958775816	5047445	0.0412242	0.0052369	0.0372086	0.00451494	0.0383651	0.00472392	0.0391617	0.00487519	0.0396895	0.00497631	1.0005
65	0.359445	0.903349	6.06348	953175534	5600282	0.0468245	0.00584108	0.0419836	0.00498031	0.0433773	0.0052277	0.0443475	0.00540875	0.0449932	0.00553173	0.999716
66	0.356637	0.892455	5.76198	946974616	6200918	0.0530254	0.00650554	0.0472083	0.00548137	0.0488806	0.0057737	0.0500563	0.00598929	0.050844	0.0061382	0.99988
67	0.353649	0.880761	5.46444	940131176	6843440	0.0598688	0.00722664	0.0529012	0.00601158	0.0548999	0.0063563	0.0563173	0.00661158	0.0572746	0.00679076	0.999903
68	0.350478	0.868258	5.1769	932603491	7527685	0.0673965	0.00800706	0.0590773	0.00656943	0.0614573	0.00697503	0.0631576	0.00727593	0.0643167	0.00749052	0.999935
69	0.347128	0.854958	4.89611	924353742	8249749	0.0756463	0.00884593	0.0657452	0.00714981	0.0685698	0.00762643	0.0705993	0.00797943	0.0719966	0.00823495	0.999742
70	0.343597	0.840862	4.62991	915345245	9008497	0.0846548	0.00974572	0.0729089	0.0077499	0.0762507	0.00830955	0.0786618	0.00872233	0.0803384	0.00902439	0.999598
71	0.339884	0.82598	4.37449	905539924	9805321	0.0944601	0.0107122	0.080569	0.0083686	0.0845124	0.00902574	0.0873641	0.00950709	0.0893656	0.00986209	1.00007
72	0.336001	0.810363	4.12362	894915938	10623986	0.105084	0.0117322	0.0887089	0.00898893	0.0933501	0.00975962	0.0967086	0.0103192	0.0990854	0.0107337	1.00003
73	0.331957	0.79405	3.88492	883453972	11461966	0.116546	0.0128079	0.0973051	0.00960558	0.102754	0.0105083	0.106693	0.0111571	0.109501	0.0116384	0.999948
74	0.327753	0.777081	3.66142	871142270	12311702	0.128858	0.0139359	0.106325	0.0102095	0.112705	0.0112638	0.117308	0.0120147	0.120606	0.0125708	0.999876
75	0.323405	0.759532	3.44394	857978206	13164064	0.142022	0.0151113	0.115725	0.0107904	0.123173	0.0120166	0.128532	0.0128844	0.132388	0.0135244	0.999811
76	0.318921	0.741467	3.23752	843966597	14011609	0.156033	0.016331	0.125453	0.0113392	0.13412	0.0127582	0.140338	0.01376	0.144824	0.0144938	0.999937
77	0.314319	0.722974	3.04225	829132137	14834460	0.170868	0.0175771	0.135441	0.0118344	0.145485	0.0134671	0.152678	0.0146217	0.157871	0.0154602	0.999602
78	0.309611	0.704119	2.85866	813494746	15637391	0.186505	0.01886	0.145618	0.0122736	0.157213	0.0141445	0.165508	0.0154737	0.171493	0.0164291	0.999877
79	0.304814	0.685008	2.68351	797100773	16393973	0.202899	0.0201525	0.155893	0.0126308	0.169223	0.0147638	0.178758	0.0162885	0.185627	0.0173743	0.999739
80	0.299948	0.665729	2.51858	779998726	17102047	0.220001	0.0214553	0.166175	0.0128996	0.181435	0.0153205	0.192358	0.0170615	0.200209	0.0182936	0.999719
81	0.295029	0.646375	2.36362	762250389	17748337	0.23775	0.0227543	0.176366	0.013065	0.193759	0.0157992	0.206223	0.0177762	0.215163	0.0191721	0.999602
82	0.290077	0.627039	2.21801	743925627	18324762	0.256074	0.0240403	0.186362	0.0131139	0.206097	0.016186	0.220263	0.0184191	0.230407	0.0199983	0.999416
83	0.285098	0.607789	2.08266	725090676	18834951	0.274909	0.0253183	0.196065	0.0130434	0.218354	0.0164765	0.234389	0.0189881	0.24586	0.0207725	0.999726
84	0.28012	0.58872	1.95455	705829239	19261437	0.294171	0.0265642	0.205376	0.0128403	0.230426	0.0166494	0.2485	0.019461	0.261428	0.0214708	0.99988
85	0.275157	0.569902	1.83563	686225609	19603630	0.313774	0.0277739	0.214203	0.0125067	0.242212	0.0166985	0.262498	0.0198324	0.277017	0.0220861	1.00004
86	0.270225	0.551414	1.72435	666376054	19849555	0.333624	0.0289257	0.222464	0.0120386	0.25361	0.0166084	0.276281	0.0200843	0.292524	0.0225975	0.999678
87	0.265337	0.53331	1.62078	646363087	20012967	0.353637	0.0300325	0.230094	0.0114495	0.264527	0.0163826	0.289755	0.0202205	0.307858	0.0230102	0.999485
88	0.260496	0.515611	1.52572	626254724	20108363	0.373745	0.03111	0.237045	0.0107538	0.274886	0.0160271	0.302841	0.0202456	0.322939	0.0233317	1.00009
89	0.255731	0.498399	1.43495	606148739	20105985	0.393851	0.0321051	0.243274	0.00994601	0.284604	0.0155187	0.315443	0.0201222	0.337668	0.0235204	0.999865
90	0.251048	0.481697	1.35158	586122338	20026401	0.413878	0.0330388	0.248761	0.00905278	0.293622	0.0148775	0.327483	0.0198639	0.351968	0.0235918	0.999593
91	0.246451	0.465521	1.27451	566243887	19878451	0.433756	0.0339152	0.253508	0.00809844	0.301896	0.0141152	0.338897	0.0194733	0.365771	0.0235487	0.999433
92	0.241944	0.449884	1.20287	546571649	19672238	0.453428	0.0347416	0.257534	0.00711144	0.309395	0.0132447	0.349628	0.0189514	0.379016	0.023391	0.999589
93	0.237545	0.434812	1.13536	527165854	19405795	0.472834	0.0355046	0.260878	0.00611815	0.316103	0.0122729	0.359625	0.0182911	0.391645	0.0231055	0.999642
94	0.233245	0.420294	1.07409	508086618	19079236	0.491913	0.0361921	0.263592	0.00514688	0.322014	0.0112121	0.368848	0.0174942	0.403603	0.0226838	0.999231
95	0.229051	0.406331	1.01653	489365301	18721317	0.510635	0.0368467	0.265742	0.0042324	0.327144	0.0100962	0.377278	0.0165923	0.414859	0.0221533	0.999481
96	0.224965	0.392918	0.963143	471045553	18319748	0.528954	0.0374357	0.267403	0.00339317	0.331518	0.00893909	0.384903	0.0155804	0.425377	0.0214947	0.999422
97	0.220984	0.38004	0.913436	453144705	17900848	0.546855	0.0380024	0.268653	0.00265409	0.335182	0.0077789	0.391727	0.0144878	0.435142	0.0207301	1.00013
98	0.217117	0.367701	0.867179	435712169	17432536	0.564288	0.0384701	0.269569	0.00202122	0.338186	0.00662917	0.397753	0.013298	0.444123	0.0198188	0.999514
99	0.213355	0.355874	0.824219	418751102	16961067	0.581249	0.0389272	0.270223	0.0015024	0.340599	0.00553584	0.403007	0.0120595	0.452321	0.0188163	0.999805
100	0.209704	0.34455	0.784234	402286695	16464407	0.597713	0.0393179	0.27068	0.0010897	0.34249	0.00451625	0.407519	0.0107733	0.459735	0.017705	0.999474
101	0.206153	0.333705	0.74702	386320680	15966015	0.613679	0.0396882	0.27099	0.000772728	0.343937	0.00359733	0.411331	0.00947694	0.46638	0.0165178	0.99962
102	0.202711	0.323329	0.711991	370862834	15457846	0.629137	0.040013	0.271197	0.000534774	0.345016	0.00279451	0.414495	0.00819046	0.472273	0.0152544	0.999527
103	0.19937	0.3134	0.679485	355914537	14948297	0.644085	0.0403068	0.271331	0.000360343	0.345802	0.00211772	0.417071	0.00694567	0.477441	0.0139329	0.999484
104	0.196123	0.303892	0.649301	341473173	14441364	0.658527	0.0405754	0.271415	0.000235946	0.346359	0.00156601	0.419125	0.00577022	0.481915	0.01257	0.99956
105	0.192974	0.294796	0.620453	327529060	13944113	0.672471	0.0408352	0.271466	0.000149865	0.346746	0.00113175	0.420727	0.00469053	0.485735	0.011189	1.00009
106	0.18992	0.286094	0.593884	314091329	13437731	0.685909	0.0410276	0.271496	9.19018e-05	0.347007	0.000798807	0.421945	0.00371874	0.488944	0.00979678	0.999581
107	0.186951	0.277751	0.569347	301141005	12950324	0.698859	0.0412311	0.271513	5.42189e-05	0.34718	0.000551053	0.422849	0.00287958	0.491595	0.0084398	0.999889
108	0.184067	0.269759	0.546076	288674053	12466952	0.711326	0.0413991	0.271522	3.08423e-05	0.347292	0.000370108	0.423504	0.00217511	0.493743	0.00713388	0.999828
109	0.181275	0.262114	0.523617	276680792	11993261	0.723319	0.041546	0.271527	1.66184e-05	0.347362	0.00024159	0.423967	0.00160347	0.495449	0.00590826	0.999702
110	0.17856	0.254787	0.503037	265147708	11533084	0.734852	0.0416837	0.271529	8.54516e-06	0.347404	0.000152979	0.424287	0.00115526	0.496773	0.004788	0.999748
111	0.175917	0.247759	0.483616	254059821	11087887	0.74594	0.0418178	0.27153	4.18178e-06	0.347429	9.36718e-05	0.424502	0.000814192	0.497778	0.00379036	1.00006
112	0.173356	0.241027	0.465219	243417073	10642748	0.756583	0.0418907	0.271531	1.88508e-06	0.347443	5.50863e-05	0.424645	0.000559869	0.498522	0.00292565	0.999229
113	0.170864	0.234568	0.447979	233197117	10219956	0.766803	0.0419854	0.271531	8.39707e-07	0.34745	3.12791e-05	0.424736	0.000375349	0.499059	0.00220591	0.999199
114	0.16844	0.228374	0.43147	223387547	9809570	0.776612	0.0420656	0.271531	2.10328e-07	0.347454	1.68262e-05	0.424793	0.000244611	0.499437	0.00162352	0.999078
115	0.166081	0.222422	0.416175	213971903	9415644	0.786028	0.0421494	0.271531	0	0.347456	8.64062e-06	0.424828	0.000154688	0.499698	0.00116817	0.999267
116	0.163784	0.216702	0.401454	204931391	9040512	0.795069	0.0422509	0.271531	0	0.347457	4.22509e-06	0.424848	9.46421e-05	0.499874	0.000822626	1.00007
117	0.161548	0.211206	0.387655	196262190	8669201	0.803738	0.0423029	0.271531	0	0.347457	1.90363e-06	0.424859	5.56284e-05	0.49999	0.000565379	0.999887
118	0.15937	0.205925	0.374457	187951376	8310814	0.812049	0.0423455	0.271531	0	0.347458	8.46909e-07	0.424865	3.15474e-05	0.500064	0.000378568	0.999634
119	0.15725	0.200843	0.362044	179980082	7971294	0.82002	0.0424115	0.271531	0	0.347458	2.12057e-07	0.424869	1.69646e-05	0.500111	0.000246623	1.00008
120	0.155188	0.195951	0.350244	172337830	7642252	0.827662	0.0424617	0.271531	0	0.347458	0	0.42487	8.70464e-06	0.500139	0.000155834	1.00027
