# Supplementary material for: Quantifying the Potential for Future Gene Therapy to Lower Lifetime Risk of Polygenic Late-Onset Diseases
Source: MDPI journal article supplement (doi:10.3390/ijms20133352), 2019-07-08
Supplement: s2 [file s2 › SuppFiles/Results/LODsRareMedium/Stroke/1.000/IndividualsByBetaDistrib.csv]

nEntry	Beta	nDetrimentalCount	nFractionPopulation	nCumulativeFractionPopulation	nEditsNeeded	nIndividuals
0	-19.8	0	0	1	0	0
1	-19.6	0	0	1	0	0
2	-19.4	0	0	1	0	0
3	-19.2	0	0	1	0	0
4	-19	0	0	1	0	0
5	-18.8	0	0	1	0	0
6	-18.6	0	0	1	0	0
7	-18.4	0	0	1	0	0
8	-18.2	0	0	1	0	0
9	-18	0	0	1	0	0
10	-17.8	0	0	1	0	0
11	-17.6	0	0	1	0	0
12	-17.4	0	0	1	0	0
13	-17.2	0	0	1	0	0
14	-17	0	0	1	0	0
15	-16.8	0	0	1	0	0
16	-16.6	0	0	1	0	0
17	-16.4	0	0	1	0	0
18	-16.2	0	0	1	0	0
19	-16	0	0	1	0	0
20	-15.8	0	0	1	0	0
21	-15.6	0	0	1	0	0
22	-15.4	0	0	1	0	0
23	-15.2	0	0	1	0	0
24	-15	0	0	1	0	0
25	-14.8	0	0	1	0	0
26	-14.6	0	0	1	0	0
27	-14.4	0	0	1	0	0
28	-14.2	0	0	1	0	0
29	-14	0	0	1	0	0
30	-13.8	0	0	1	0	0
31	-13.6	0	0	1	0	0
32	-13.4	0	0	1	0	0
33	-13.2	0	0	1	0	0
34	-13	0	0	1	0	0
35	-12.8	0	0	1	0	0
36	-12.6	0	0	1	0	0
37	-12.4	0	0	1	0	0
38	-12.2	0	0	1	0	0
39	-12	0	0	1	0	0
40	-11.8	0	0	1	0	0
41	-11.6	0	0	1	0	0
42	-11.4	0	0	1	0	0
43	-11.2	0	0	1	0	0
44	-11	0	0	1	0	0
45	-10.8	0	0	1	0	0
46	-10.6	0	0	1	0	0
47	-10.4	0	0	1	0	0
48	-10.2	0	0	1	0	0
49	-10	0	0	1	0	0
50	-9.8	0	0	1	0	0
51	-9.6	0	0	1	0	0
52	-9.4	0	0	1	0	0
53	-9.2	0	0	1	0	0
54	-9	0	0	1	0	0
55	-8.8	0	0	1	0	0
56	-8.6	0	0	1	0	0
57	-8.4	0	0	1	0	0
58	-8.2	0	0	1	0	0
59	-8	0	0	1	0	0
60	-7.8	0	0	1	0	0
61	-7.6	0	0	1	0	0
62	-7.4	0	0	1	0	0
63	-7.2	0	0	1	0	0
64	-7	0	0	1	0	0
65	-6.8	0	0	1	0	0
66	-6.6	0	0	1	0	0
67	-6.4	0	0	1	0	0
68	-6.2	0	0	1	0	0
69	-6	0	0	1	0	0
70	-5.8	0	0	1	0	0
71	-5.6	0	0	1	0	0
72	-5.4	0	0	1	0	0
73	-5.2	0	0	1	0	0
74	-5	0	0	1	0	0
75	-4.8	0	0	1	0	0
76	-4.6	0	0	1	0	0
77	-4.4	0	0	1	0	0
78	-4.2	0	0.00013445	1	0	134450
79	-4	1	0.000250447	0.99986555	0	250447
80	-3.8	1.3073	0.000721781	0.9996151	0	721781
81	-3.6	1.7874	0.001771585	0.99889332	0	1771585
82	-3.4	2.2281	0.001798191	0.99712174	0	1798191
83	-3.2	2.6764	0.004102453	0.99532355	0	4102453
84	-3	2.9503	0.005790144	0.99122109	0	5790144
85	-2.8	3.4601	0.008109714	0.98543095	0	8109714
86	-2.6	3.9003	0.013597358	0.97732124	0	13597358
87	-2.4	4.1601	0.015934193	0.96372388	0	15934193
88	-2.2	4.6614	0.019808777	0.94778968	0	19808777
89	-2	5.0464	0.02783449	0.92798091	0	27834490
90	-1.8	5.3427	0.030535738	0.90014642	0	30535738
91	-1.6	5.8368	0.035454922	0.86961068	0	35454922
92	-1.4	6.1824	0.043680284	0.83415576	0	43680284
93	-1.2	6.5021	0.045256238	0.79047547	0	45256238
94	-1	6.9735	0.048999857	0.74521923	0	48999857
95	-0.8	7.3101	0.054133752	0.69621938	0	54133752
96	-0.6	7.6523	0.053661399	0.64208563	0	53661399
97	-0.4	8.0802	0.05517227	0.58842423	0	55172270
98	-0.2	8.417	0.056436305	0.53325196	0	56436305
99	0	8.7804	0.053526275	0.47681565	0	53526275
100	0.2	9.1883	0.051744185	0.42328938	0.40788	51744185
101	0.4	9.5254	0.04944749	0.37154519	0.74499	49447490
102	0.6	9.8855	0.045080922	0.3220977	1.1051	45080922
103	0.8	10.289	0.041202458	0.27701678	1.5087	41202458
104	1	10.632	0.037673586	0.23581432	1.8519	37673586
105	1.2	10.989	0.033049338	0.19814074	2.2091	33049338
106	1.4	11.372	0.029019136	0.1650914	2.5919	29019136
107	1.6	11.726	0.025081167	0.13607226	2.9456	25081167
108	1.8	12.081	0.021264235	0.11099109	3.301	21264235
109	2	12.458	0.018054007	0.08972686	3.6777	18054007
110	2.2	12.804	0.01500852	0.071672853	4.0234	15008520
111	2.4	13.168	0.012223512	0.056664333	4.3874	12223512
112	2.6	13.543	0.009927085	0.044440821	4.7625	9927085
113	2.8	13.895	0.007989227	0.034513736	5.1148	7989227
114	3	14.25	0.006323954	0.026524509	5.4692	6323954
115	3.2	14.626	0.004947373	0.020200555	5.8452	4947373
116	3.4	14.962	0.003832228	0.015253182	6.1819	3832228
117	3.6	15.331	0.002958781	0.011420954	6.5509	2958781
118	3.8	15.692	0.002246288	0.008462173	6.9117	2246288
119	4	16.045	0.001691219	0.006215885	7.2645	1691219
120	4.2	16.397	0.001253822	0.004524666	7.6171	1253822
121	4.4	16.763	0.000931208	0.003270844	7.9828	931208
122	4.6	17.116	0.000676477	0.002339636	8.3358	676477
123	4.8	17.473	0.000494039	0.001663159	8.6923	494039
124	5	17.827	0.000353738	0.00116912	9.0467	353738
125	5.2	18.183	0.000251195	0.000815382	9.403	251195
126	5.4	18.539	0.000176276	0.000564187	9.7589	176276
127	5.6	18.897	0.000123317	0.000387911	10.116	123317
128	5.8	19.247	8.5223e-05	0.000264594	10.467	85223
129	6	19.6	5.9061e-05	0.000179371	10.82	59061
130	6.2	19.953	4.0365e-05	0.00012031	11.173	40365
131	6.4	20.317	2.6821e-05	7.9945e-05	11.537	26821
132	6.6	20.672	1.8189e-05	5.3124e-05	11.892	18189
133	6.8	21.008	1.2287e-05	3.4935e-05	12.228	12287
134	7	21.386	8e-06	2.2648e-05	12.606	8000
135	7.2	21.704	5.162e-06	1.4648e-05	12.924	5162
136	7.4	22.063	3.448e-06	9.486e-06	13.283	3448
137	7.6	22.422	2.261e-06	6.038e-06	13.642	2261
138	7.8	22.833	1.411e-06	3.777e-06	14.052	1411
139	8	23.113	9.29e-07	2.366e-06	14.333	929
140	8.2	23.442	5.61e-07	1.437e-06	14.662	561
141	8.4	23.936	3.45e-07	8.76e-07	15.156	345
142	8.6	24.21	2e-07	5.31e-07	15.43	200
143	8.8	24.42	1.31e-07	3.31e-07	15.639	131
144	9	25.169	7.1e-08	2e-07	16.389	71
145	9.2	25	4.1e-08	1.29e-07	16.22	41
146	9.4	25.769	3.9e-08	8.8e-08	16.989	39
147	9.6	25.88	2.5e-08	4.9e-08	17.1	25
148	9.8	25.625	8e-09	2.4e-08	16.845	8
149	10	26.143	7e-09	1.6e-08	17.362	7
150	10.2	26.667	6e-09	9e-09	17.886	6
151	10.4	27	1e-09	3e-09	18.22	1
152	10.6	29	2e-09	2e-09	20.22	2
153	10.8	0	0	0	0	0
154	11	0	0	0	0	0
155	11.2	0	0	0	0	0
156	11.4	0	0	0	0	0
157	11.6	0	0	0	0	0
158	11.8	0	0	0	0	0
159	12	0	0	0	0	0
160	12.2	0	0	0	0	0
161	12.4	0	0	0	0	0
162	12.6	0	0	0	0	0
163	12.8	0	0	0	0	0
164	13	0	0	0	0	0
165	13.2	0	0	0	0	0
166	13.4	0	0	0	0	0
167	13.6	0	0	0	0	0
168	13.8	0	0	0	0	0
169	14	0	0	0	0	0
170	14.2	0	0	0	0	0
171	14.4	0	0	0	0	0
172	14.6	0	0	0	0	0
173	14.8	0	0	0	0	0
174	15	0	0	0	0	0
175	15.2	0	0	0	0	0
176	15.4	0	0	0	0	0
177	15.6	0	0	0	0	0
178	15.8	0	0	0	0	0
179	16	0	0	0	0	0
180	16.2	0	0	0	0	0
181	16.4	0	0	0	0	0
182	16.6	0	0	0	0	0
183	16.8	0	0	0	0	0
184	17	0	0	0	0	0
185	17.2	0	0	0	0	0
186	17.4	0	0	0	0	0
187	17.6	0	0	0	0	0
188	17.8	0	0	0	0	0
189	18	0	0	0	0	0
190	18.2	0	0	0	0	0
191	18.4	0	0	0	0	0
192	18.6	0	0	0	0	0
193	18.8	0	0	0	0	0
194	19	0	0	0	0	0
195	19.2	0	0	0	0	0
196	19.4	0	0	0	0	0
197	19.6	0	0	0	0	0
198	19.8	0	0	0	0	0
199	20	0	0	0	0	0
