# Supplementary material for: Quantifying the Potential for Future Gene Therapy to Lower Lifetime Risk of Polygenic Late-Onset Diseases
Source: MDPI journal article supplement (doi:10.3390/ijms20133352), 2019-07-08
Supplement: s2 [file s2 › SuppFiles/Results/LODsRareMedium/Stroke/EnvironmentArray.csv]

Age	Env	Incidence	CasesExpected
0	0	-0.000265226	0
1	0	-0.000264834	0
2	0	-0.000264392	0
3	0	-0.000263892	0
4	0	-0.000263328	0
5	0	-0.000262691	0
6	0	-0.000261972	0
7	0	-0.00026116	0
8	0	-0.000260244	0
9	0	-0.00025921	0
10	0	-0.000258043	0
11	0	-0.000256726	0
12	0	-0.000255238	0
13	0	-0.000253559	0
14	0	-0.000251664	0
15	0	-0.000249525	0
16	0	-0.000247111	0
17	0	-0.000244386	0
18	0	-0.00024131	0
19	0	-0.000237838	0
20	0	-0.000233919	0
21	0	-0.000229496	0
22	0	-0.000224505	0
23	0	-0.000218871	0
24	0	-0.000212513	0
25	0	-0.000205339	0
26	0	-0.000197242	0
27	0	-0.000188106	0
28	0	-0.000177797	0
29	0	-0.000166165	0
30	0	-0.000153042	0
31	0	-0.000138238	0
32	0	-0.000121538	0
33	0	-0.000102701	0
34	0	-8.14572e-05	0
35	0	-5.75006e-05	0
36	0	-3.0489e-05	0
37	0	-3.7228e-08	0
38	1.0071851e-05	3.42868e-05	857
39	2.1524899e-05	7.2968e-05	1824
40	3.4542488e-05	0.00011655	2913
41	4.9324317e-05	0.000165642	4140
42	6.6196774e-05	0.000220924	5520
43	8.5443779e-05	0.000283159	7074
44	0.00010738974	0.000353195	8821
45	0.0001324399	0.00043198	10786
46	0.0001610772	0.000520567	12992
47	0.00019396891	0.000620126	15469
48	0.00023150522	0.000731953	18247
49	0.00027446564	0.00085748	21361
50	0.00032363109	0.000998286	24847
51	0.00038016279	0.00115611	28746
52	0.00044497807	0.00133284	33102
53	0.00051910482	0.00153055	37962
54	0.00060432506	0.00175148	43376
55	0.00070170536	0.00199806	49396
56	0.00081396126	0.00227288	56077
57	0.00094220134	0.0025787	63478
58	0.0010895467	0.00291843	71655
59	0.0012580335	0.0032951	80668
60	0.0014509907	0.00371185	90571
61	0.001672147	0.00417187	101418
62	0.0019252851	0.00467831	113255
63	0.0022147616	0.00523429	126121
64	0.0025440923	0.00584273	140045
65	0.0029192174	0.00650632	155039
66	0.0033464616	0.00722733	171100
67	0.0038303773	0.00800758	188200
68	0.004377023	0.00884822	206293
69	0.0049945451	0.00974965	225299
70	0.0056894243	0.0107114	245111
71	0.0064675793	0.0117319	265589
72	0.0073364611	0.0128085	286559
73	0.0083029768	0.0139376	307823
74	0.0093745358	0.0151141	329158
75	0.010556856	0.016332	350306
76	0.011853704	0.0175841	371007
77	0.013270914	0.0188623	390978
78	0.01481409	0.0201578	409946
79	0.016481503	0.0214613	427661
80	0.018275104	0.0227634	443863
81	0.0201969	0.0240544	458364
82	0.022246886	0.0253253	470981
83	0.024421371	0.0265674	481568
84	0.026721243	0.0277729	490041
85	0.029137094	0.028935	496381
86	0.031669904	0.030048	500549
87	0.034311344	0.0311073	502609
88	0.037059474	0.0321094	502657
89	0.039902744	0.0330522	500815
90	0.042831816	0.0339344	497204
91	0.045852331	0.0347559	491957
92	0.048963207	0.0355173	485267
93	0.052144791	0.0362199	477276
94	0.055405821	0.0368658	468180
95	0.058727893	0.0374574	458150
96	0.06212093	0.0379974	447338
97	0.065568971	0.0384888	435909
98	0.069081465	0.0389348	423992
99	0.072646089	0.0393386	411717
100	0.076262318	0.0397032	399190
101	0.079937687	0.0400319	386512
102	0.083661247	0.0403276	373766
103	0.087434673	0.0405932	361063
104	0.091263021	0.0408314	348426
105	0.095118321	0.0410448	335941
106	0.099034389	0.0412356	323643
107	0.10299453	0.0414062	311582
108	0.10701661	0.0415584	299777
109	0.11105509	0.0416942	288247
110	0.1151548	0.0418153	277030
111	0.11929732	0.0419231	266125
112	0.12348013	0.042019	255561
113	0.12770568	0.0421044	245330
114	0.13200394	0.0421803	235416
115	0.13634683	0.0422478	225845
116	0.14073226	0.0423077	216618
117	0.14516627	0.042361	207705
118	0.1496769	0.0424082	199132
119	0.15418067	0.0424502	190869
