# Supplementary material for: Quantifying the Potential for Future Gene Therapy to Lower Lifetime Risk of Polygenic Late-Onset Diseases
Source: MDPI journal article supplement (doi:10.3390/ijms20133352), 2019-07-08
Supplement: s2 [file s2 › SuppFiles/Results/LODsRareMedium/Stroke/EnvironmentArraySD.csv]

Age	Env	EnvSD	Incidence	CasesExpected
0	0	0	-0.000265226	0
1	0	0	-0.000264834	0
2	0	0	-0.000264392	0
3	0	0	-0.000263892	0
4	0	0	-0.000263328	0
5	0	0	-0.000262691	0
6	0	0	-0.000261972	0
7	0	0	-0.00026116	0
8	0	0	-0.000260244	0
9	0	0	-0.00025921	0
10	0	0	-0.000258043	0
11	0	0	-0.000256726	0
12	0	0	-0.000255238	0
13	0	0	-0.000253559	0
14	0	0	-0.000251664	0
15	0	0	-0.000249525	0
16	0	0	-0.000247111	0
17	0	0	-0.000244386	0
18	0	0	-0.00024131	0
19	0	0	-0.000237838	0
20	0	0	-0.000233919	0
21	0	0	-0.000229496	0
22	0	0	-0.000224505	0
23	0	0	-0.000218871	0
24	0	0	-0.000212513	0
25	0	0	-0.000205339	0
26	0	0	-0.000197242	0
27	0	0	-0.000188106	0
28	0	0	-0.000177797	0
29	0	0	-0.000166165	0
30	0	0	-0.000153042	0
31	0	0	-0.000138238	0
32	0	0	-0.000121538	0
33	0	0	-0.000102701	0
34	0	0	-8.14572e-05	0
35	0	0	-5.75006e-05	0
36	0	0	-3.0489e-05	0
37	0	0	-3.7228e-08	0
38	1.0071851e-05	1.491e-08	3.42868e-05	857
39	2.1524899e-05	2.336e-08	7.2968e-05	1824
40	3.4542488e-05	3.921e-08	0.00011655	2913
41	4.9324317e-05	3.409e-08	0.000165642	4140
42	6.6196774e-05	2.935e-08	0.000220924	5520
43	8.5443779e-05	3.934e-08	0.000283159	7074
44	0.00010738974	6.829e-08	0.000353195	8821
45	0.0001324399	8.429e-08	0.00043198	10786
46	0.0001610772	9.139e-08	0.000520567	12992
47	0.00019396891	1.119e-07	0.000620126	15469
48	0.00023150522	1.201e-07	0.000731953	18247
49	0.00027446564	1.224e-07	0.00085748	21361
50	0.00032363109	1.126e-07	0.000998286	24847
51	0.00038016279	1.3e-07	0.00115611	28746
52	0.00044497807	8.197e-08	0.00133284	33102
53	0.00051910482	1.902e-07	0.00153055	37962
54	0.00060432506	9.282e-08	0.00175148	43376
55	0.00070170536	2.139e-07	0.00199806	49396
56	0.00081396126	1.826e-07	0.00227288	56077
57	0.00094220134	1.407e-07	0.0025787	63478
58	0.0010895467	1.408e-07	0.00291843	71655
59	0.0012580335	1.664e-07	0.0032951	80668
60	0.0014509907	3.58e-07	0.00371185	90571
61	0.001672147	2.737e-07	0.00417187	101418
62	0.0019252851	3.557e-07	0.00467831	113255
63	0.0022147616	3.269e-07	0.00523429	126121
64	0.0025440923	3.627e-07	0.00584273	140045
65	0.0029192174	5.059e-07	0.00650632	155039
66	0.0033464616	4.022e-07	0.00722733	171100
67	0.0038303773	3.876e-07	0.00800758	188200
68	0.004377023	3.453e-07	0.00884822	206293
69	0.0049945451	6.66e-07	0.00974965	225299
70	0.0056894243	5.706e-07	0.0107114	245111
71	0.0064675793	8.449e-07	0.0117319	265589
72	0.0073364611	6.12e-07	0.0128085	286559
73	0.0083029768	9.083e-07	0.0139376	307823
74	0.0093745358	5.868e-07	0.0151141	329158
75	0.010556856	1.211e-06	0.016332	350306
76	0.011853704	1.126e-06	0.0175841	371007
77	0.013270914	1.139e-06	0.0188623	390978
78	0.01481409	2.137e-06	0.0201578	409946
79	0.016481503	1.95e-06	0.0214613	427661
80	0.018275104	1.437e-06	0.0227634	443863
81	0.0201969	2.399e-06	0.0240544	458364
82	0.022246886	1.929e-06	0.0253253	470981
83	0.024421371	2.147e-06	0.0265674	481568
84	0.026721243	2.192e-06	0.0277729	490041
85	0.029137094	2.748e-06	0.028935	496381
86	0.031669904	2.427e-06	0.030048	500549
87	0.034311344	2.689e-06	0.0311073	502609
88	0.037059474	2.595e-06	0.0321094	502657
89	0.039902744	1.692e-06	0.0330522	500815
90	0.042831816	2.93e-06	0.0339344	497204
91	0.045852331	2.776e-06	0.0347559	491957
92	0.048963207	4.22e-06	0.0355173	485267
93	0.052144791	4.661e-06	0.0362199	477276
94	0.055405821	4.248e-06	0.0368658	468180
95	0.058727893	2.094e-05	0.0374574	458150
96	0.06212093	8.634e-06	0.0379974	447338
97	0.065568971	1.923e-05	0.0384888	435909
98	0.069081465	2.219e-05	0.0389348	423992
99	0.072646089	1.812e-05	0.0393386	411717
100	0.076262318	1.861e-05	0.0397032	399190
101	0.079937687	2.152e-05	0.0400319	386512
102	0.083661247	1.703e-05	0.0403276	373766
103	0.087434673	2.024e-05	0.0405932	361063
104	0.091263021	1.953e-05	0.0408314	348426
105	0.095118321	1.092e-05	0.0410448	335941
106	0.099034389	2.346e-05	0.0412356	323643
107	0.10299453	1.723e-05	0.0414062	311582
108	0.10701661	2.266e-05	0.0415584	299777
109	0.11105509	9.118e-06	0.0416942	288247
110	0.1151548	2.201e-05	0.0418153	277030
111	0.11929732	1.688e-05	0.0419231	266125
112	0.12348013	1.744e-05	0.042019	255561
113	0.12770568	1.779e-05	0.0421044	245330
114	0.13200394	2.836e-05	0.0421803	235416
115	0.13634683	1.853e-05	0.0422478	225845
116	0.14073226	2.402e-05	0.0423077	216618
117	0.14516627	2.143e-05	0.042361	207705
118	0.1496769	3.384e-05	0.0424082	199132
119	0.15418067	2.507e-05	0.0424502	190869
