# Supplementary material for: Quantifying the Potential for Future Gene Therapy to Lower Lifetime Risk of Polygenic Late-Onset Diseases
Source: MDPI journal article supplement (doi:10.3390/ijms20133352), 2019-07-08
Supplement: s2 [file s2 › SuppFiles/Results/LODsRareMedium/Stroke/FrailtyAnalysis.csv]

Age	Heritability	MeanOR	CaseOR	nControls	nCases	nCumIncidence	nIncidence	nLifeIncidence0	nAbsIncidence0	nLifeIncidence5	nAbsIncidence5	nLifeIncidence10	nAbsIncidence10	nLifeIncidence15	nAbsIncidence15
39	0.38661	1.0003	13.469	9999633	367	3.67e-05	3.67e-05	3.5637e-05	3.5637e-05	3.5875e-05	3.5875e-05	3.607e-05	3.607e-05	3.6239e-05	3.6239e-05
40	0.38653	1.0001	15.631	9998875	758	0.0001125	7.5803e-05	0.00010913	7.3493e-05	0.00010988	7.4008e-05	0.00011049	7.4426e-05	0.00011102	7.4784e-05
41	0.38642	0.99981	14.04	9997641	1234	0.0002359	0.00012341	0.00022857	0.00011946	0.00023021	0.00012034	0.00023152	0.00012104	0.00023265	0.00012164
42	0.38628	0.99939	12.56	9995964	1677	0.0004036	0.00016774	0.00039062	0.00016208	0.00039351	0.00016335	0.00039583	0.00016434	0.00039779	0.00016518
43	0.38608	0.99882	13.514	9993792	2172	0.0006208	0.00021729	0.00060011	0.00020957	0.00060473	0.0002113	0.00060839	0.00021265	0.00061147	0.00021377
44	0.38585	0.9981	12.532	9990938	2854	0.0009062	0.00028558	0.00087483	0.00027489	0.00088186	0.0002773	0.00088737	0.00027915	0.00089197	0.00028067
45	0.38555	0.9972	12.809	9987389	3549	0.0012611	0.00035522	0.0012157	0.0003412	0.001226	0.0003444	0.0012339	0.00034681	0.0012404	0.00034877
46	0.3852	0.99613	12.212	9983140	4249	0.001686	0.00042544	0.0016229	0.00040768	0.0016372	0.0004118	0.0016482	0.00041484	0.0016572	0.00041727
47	0.38476	0.9948	12.397	9977846	5294	0.0022154	0.00053029	0.0021289	0.00050687	0.0021488	0.00051242	0.0021637	0.00051641	0.0021758	0.00051955
48	0.38425	0.99322	12.018	9971493	6353	0.0028507	0.00063671	0.0027344	0.00060689	0.0027615	0.00061411	0.0027815	0.00061917	0.0027976	0.00062311
49	0.38368	0.99145	11.362	9964183	7310	0.0035817	0.00073309	0.0034291	0.00069661	0.0034652	0.00070566	0.0034913	0.00071185	0.0035121	0.0007166
50	0.38304	0.98941	11.065	9955675	8508	0.0044325	0.00085386	0.0042348	0.00080864	0.0042824	0.00082015	0.0043162	0.00082784	0.0043428	0.00083364
51	0.38232	0.98706	10.847	9945792	9883	0.0054208	0.0009927	0.0051673	0.00093665	0.0052295	0.00095127	0.0052729	0.00096089	0.0053065	0.00096798
52	0.38149	0.98435	10.581	9934304	11488	0.0065696	0.0011551	0.0062468	0.0010854	0.0063275	0.001104	0.0063829	0.0011161	0.0064252	0.0011248
53	0.38058	0.98131	9.9905	9921050	13254	0.007895	0.0013342	0.0074867	0.0012481	0.0075908	0.0012717	0.0076613	0.0012868	0.0077141	0.0012974
54	0.37951	0.9778	10.03	9905768	15282	0.0094232	0.0015404	0.0089094	0.001434	0.009043	0.0014637	0.0091323	0.0014827	0.009198	0.0014957
55	0.37837	0.9739	9.5815	9888480	17288	0.011152	0.0017452	0.01051	0.0016161	0.01068	0.0016528	0.010793	0.0016763	0.010874	0.0016921
56	0.37709	0.96952	9.2101	9868673	19807	0.013133	0.002003	0.012334	0.0018441	0.012549	0.0018899	0.012691	0.0019195	0.012791	0.0019389
57	0.37569	0.96469	8.7186	9846255	22418	0.015374	0.0022716	0.014385	0.0020783	0.014656	0.0021346	0.014834	0.0021713	0.014958	0.002195
58	0.37419	0.95937	8.3949	9821154	25101	0.017885	0.0025493	0.016666	0.0023165	0.017004	0.0023848	0.017226	0.0024299	0.017379	0.0024588
59	0.37254	0.9534	7.9433	9792242	28912	0.020776	0.0029438	0.019274	0.0026555	0.019695	0.0027405	0.019974	0.0027974	0.020162	0.0028337
60	0.37072	0.9468	7.6812	9759739	32503	0.024026	0.0033193	0.022183	0.0029707	0.022705	0.0030736	0.023052	0.0031435	0.023284	0.0031882
61	0.36879	0.93965	7.3003	9723678	36061	0.027632	0.0036949	0.025383	0.0032792	0.026025	0.0034017	0.026454	0.0034862	0.026739	0.0035407
62	0.36666	0.93177	7.116	9683375	40303	0.031663	0.0041448	0.028928	0.0036456	0.029712	0.0037921	0.030241	0.0038948	0.030591	0.0039617
63	0.36438	0.92318	6.7323	9638252	45123	0.036175	0.0046598	0.032859	0.0040592	0.033813	0.0042344	0.034463	0.0043592	0.034892	0.0044416
64	0.36193	0.91385	6.3979	9587964	50288	0.041204	0.0052175	0.037194	0.0044983	0.038349	0.0047065	0.039144	0.0048572	0.039671	0.0049579
65	0.35929	0.90371	6.0624	9531718	56246	0.046828	0.0058663	0.04199	0.0050018	0.043383	0.0052503	0.044352	0.0054321	0.044998	0.0055556
66	0.35649	0.89282	5.7163	9469512	62206	0.053049	0.0065262	0.047231	0.0054988	0.048904	0.005792	0.050079	0.0060083	0.050867	0.0061577
67	0.35354	0.88124	5.4617	9401724	67788	0.059828	0.0071586	0.05287	0.0059549	0.054866	0.0062964	0.056281	0.0065493	0.057237	0.0067268
68	0.35035	0.86867	5.1889	9326187	75537	0.067381	0.0080344	0.059068	0.0065918	0.061446	0.0069988	0.063145	0.0073008	0.064303	0.0075161
69	0.347	0.85529	4.8823	9243064	83123	0.075694	0.0089129	0.065786	0.0072039	0.068612	0.0076841	0.070643	0.0080398	0.072042	0.0082972
70	0.34348	0.84124	4.64	9153407	89657	0.084659	0.0096999	0.072916	0.0077135	0.076257	0.0082705	0.078667	0.0086813	0.080344	0.008982
71	0.33975	0.82627	4.381	9054881	98526	0.094512	0.010764	0.080613	0.008409	0.084558	0.0090693	0.087412	0.009553	0.089414	0.0099097
72	0.33584	0.81066	4.1377	8948904	105977	0.10511	0.011704	0.088733	0.0089672	0.093374	0.009736	0.096733	0.010294	0.09911	0.010708
73	0.33177	0.79432	3.899	8834418	114486	0.11656	0.012793	0.097319	0.0095947	0.10277	0.010496	0.10671	0.011144	0.10951	0.011625
74	0.32755	0.77733	3.6679	8711294	123124	0.12887	0.013937	0.10634	0.01021	0.11272	0.011265	0.11732	0.012016	0.12062	0.012572
75	0.32321	0.7598	3.4483	8579939	131355	0.14201	0.015079	0.11572	0.010767	0.12316	0.011991	0.12852	0.012857	0.13238	0.013495
76	0.31869	0.74168	3.2455	8439583	140356	0.15604	0.016359	0.12546	0.011358	0.13413	0.01278	0.14035	0.013783	0.14483	0.014518
77	0.31415	0.72324	3.0164	8290840	148743	0.17092	0.017624	0.13548	0.011866	0.14553	0.013503	0.15272	0.014661	0.15792	0.015502
78	0.30942	0.70437	2.855	8134168	156672	0.18658	0.018897	0.14567	0.012298	0.15728	0.014172	0.16557	0.015504	0.17156	0.016461
79	0.3046	0.68518	2.6856	7969718	164450	0.20303	0.020217	0.15598	0.012671	0.16932	0.014811	0.17887	0.016341	0.18574	0.01743
80	0.29975	0.66588	2.5188	7798516	171202	0.22015	0.021482	0.16627	0.012915	0.18155	0.015339	0.19248	0.017082	0.20034	0.018316
81	0.29487	0.64661	2.3531	7621277	177239	0.23787	0.022727	0.17645	0.013049	0.19385	0.01578	0.20633	0.017755	0.21527	0.019149
82	0.28991	0.62727	2.2151	7437806	183471	0.25622	0.024074	0.18646	0.013132	0.20621	0.016208	0.22038	0.018445	0.23053	0.020026
83	0.28494	0.60806	2.0818	7249825	187981	0.27502	0.025274	0.19614	0.01302	0.21844	0.016448	0.23448	0.018955	0.24596	0.020736
84	0.28	0.58907	1.952	7057891	191934	0.29421	0.026474	0.20542	0.012797	0.23047	0.016593	0.24854	0.019395	0.26147	0.021398
85	0.27502	0.57023	1.8377	6861788	196103	0.31382	0.027785	0.21425	0.012512	0.24226	0.016705	0.26255	0.01984	0.27706	0.022095
86	0.27011	0.55176	1.722	6663304	198484	0.33367	0.028926	0.22251	0.012039	0.25366	0.016609	0.27633	0.020084	0.29257	0.022598
87	0.26522	0.53367	1.619	6463095	200209	0.35369	0.030047	0.23015	0.011455	0.26458	0.01639	0.28981	0.02023	0.30791	0.023021
88	0.26039	0.51602	1.5251	6262529	200566	0.37375	0.031033	0.23708	0.010727	0.27491	0.015987	0.30286	0.020195	0.32295	0.023274
89	0.25564	0.49883	1.4345	6061720	200809	0.39383	0.032065	0.2433	0.0099336	0.28462	0.015499	0.31545	0.020097	0.33766	0.023491
90	0.25093	0.48209	1.3536	5861311	200409	0.41387	0.033061	0.24879	0.009059	0.29364	0.014888	0.32749	0.019878	0.35197	0.023608
91	0.24634	0.46587	1.2726	5661696	199615	0.43383	0.034056	0.25356	0.0081322	0.30195	0.014174	0.33896	0.019554	0.36583	0.023647
92	0.24183	0.45023	1.2068	5465546	196150	0.45345	0.034645	0.25757	0.0070917	0.30943	0.013208	0.34966	0.018899	0.37904	0.023326
93	0.23746	0.43515	1.1337	5271103	194443	0.47289	0.035576	0.26092	0.0061305	0.31615	0.012298	0.35967	0.018328	0.39169	0.023152
94	0.23314	0.42057	1.0731	5079291	191812	0.49207	0.036389	0.26365	0.0051749	0.32209	0.011273	0.36895	0.01759	0.40372	0.022807
95	0.22892	0.40656	1.0176	4891784	187507	0.51082	0.036916	0.2658	0.0042404	0.32723	0.010115	0.37739	0.016623	0.41499	0.022195
96	0.2249	0.3932	0.9602	4708755	183029	0.52912	0.037416	0.26746	0.0033913	0.3316	0.0089343	0.38501	0.015572	0.4255	0.021483
97	0.22095	0.38035	0.91066	4529552	179203	0.54704	0.038057	0.26871	0.0026579	0.33527	0.0077902	0.39184	0.014509	0.43527	0.02076
98	0.21702	0.36795	0.8708	4355212	174340	0.56448	0.038489	0.26963	0.0020222	0.33827	0.0066325	0.39786	0.013305	0.44426	0.019829
99	0.21325	0.35615	0.82393	4185976	169236	0.5814	0.038858	0.27028	0.0014997	0.34068	0.005526	0.40311	0.012038	0.45244	0.018783
100	0.2096	0.3448	0.7874	4021816	164160	0.59782	0.039217	0.27074	0.0010869	0.34256	0.0045046	0.40761	0.010746	0.45983	0.017659
101	0.20608	0.33397	0.74395	3861620	160196	0.61384	0.039832	0.27105	0.00077552	0.34402	0.0036104	0.41143	0.0095112	0.4665	0.016578
102	0.20265	0.32367	0.71137	3707964	153656	0.6292	0.039791	0.27126	0.0005318	0.34509	0.002779	0.41458	0.0081449	0.47235	0.01517
103	0.19931	0.31376	0.67739	3558127	149837	0.64419	0.04041	0.27139	0.00036126	0.34588	0.0021231	0.41716	0.0069634	0.47753	0.013968
104	0.19606	0.30423	0.65076	3413797	144330	0.65862	0.040563	0.27147	0.00023588	0.34643	0.0015655	0.41921	0.0057685	0.482	0.012566
105	0.19293	0.29518	0.6195	3274638	139159	0.67254	0.040764	0.27153	0.0001496	0.34682	0.0011298	0.42081	0.0046823	0.48582	0.011169
106	0.18987	0.28642	0.59479	3139697	134941	0.68603	0.041208	0.27156	9.2306e-05	0.34708	0.00080232	0.42203	0.0037351	0.48904	0.0098398
107	0.1869	0.27804	0.56946	3009732	129965	0.69903	0.041394	0.27157	5.4433e-05	0.34726	0.00055323	0.42294	0.002891	0.4917	0.0084732
108	0.18404	0.27008	0.54568	2885416	124316	0.71146	0.041305	0.27158	3.0772e-05	0.34737	0.00036926	0.42359	0.0021701	0.49384	0.0071176
109	0.18121	0.26241	0.52286	2764811	120605	0.72352	0.041798	0.27159	1.6719e-05	0.34744	0.00024306	0.42406	0.0016132	0.49556	0.0059441
110	0.17854	0.25511	0.50276	2649775	115036	0.73502	0.041607	0.27159	8.5295e-06	0.34748	0.0001527	0.42438	0.0011531	0.49688	0.0047792
111	0.17586	0.24804	0.48543	2538839	110936	0.74612	0.041866	0.27159	4.1866e-06	0.3475	9.378e-05	0.42459	0.00081513	0.49788	0.0037948
112	0.17333	0.2413	0.4652	2432385	106454	0.75676	0.04193	0.27159	1.8869e-06	0.34752	5.5138e-05	0.42474	0.0005604	0.49863	0.0029284
113	0.17076	0.23477	0.4494	2329548	102837	0.76705	0.042278	0.27159	8.4557e-07	0.34753	3.1497e-05	0.42483	0.00037797	0.49917	0.0022213
114	0.16833	0.22858	0.43228	2231863	97685	0.77681	0.041933	0.27159	2.0967e-07	0.34753	1.6773e-05	0.42488	0.00024384	0.49955	0.0016184
115	0.16595	0.2226	0.41637	2137398	94465	0.78626	0.042326	0.27159	0	0.34753	8.6768e-06	0.42492	0.00015534	0.49981	0.0011731
116	0.1637	0.21691	0.39976	2046940	90458	0.79531	0.042322	0.27159	0	0.34753	4.2322e-06	0.42494	9.48e-05	0.49998	0.000824
117	0.16149	0.21141	0.38706	1960015	86925	0.804	0.042466	0.27159	0	0.34753	1.911e-06	0.42495	5.5843e-05	0.5001	0.00056756
118	0.15931	0.20613	0.37476	1876997	83018	0.8123	0.042356	0.27159	0	0.34753	8.4712e-07	0.42496	3.1555e-05	0.50017	0.00037866
119	0.15717	0.20103	0.36218	1797088	79909	0.82029	0.042573	0.27159	0	0.34753	2.1286e-07	0.42496	1.7029e-05	0.50022	0.00024756
120	0.15514	0.19617	0.34914	1720917	76171	0.82791	0.042386	0.27159	0	0.34753	0	0.42496	8.6891e-06	0.50025	0.00015556
