# Supplementary material for: Quantifying the Potential for Future Gene Therapy to Lower Lifetime Risk of Polygenic Late-Onset Diseases
Source: MDPI journal article supplement (doi:10.3390/ijms20133352), 2019-07-08
Supplement: s2 [file s2 › SuppFiles/Results/LODsRareMedium/T2D/-1.000/FrailtyAnalysis.csv]

Age	Heritability	MeanOR	CaseOR	nControls	nCases	nCumIncidence	nIncidence	nLifeIncidence0	nAbsIncidence0	nLifeIncidence5	nAbsIncidence5	nLifeIncidence10	nAbsIncidence10	nLifeIncidence15	nAbsIncidence15	nIncActDivExp
19	0.398924	0.350211	0.812386	999999755	245	2.45e-07	2.45e-07	2.42762e-07	2.42762e-07	2.43127e-07	2.43127e-07	2.43247e-07	2.43247e-07	2.43422e-07	2.43422e-07	0.0134348
20	0.398924	0.350211	0.823068	999999128	627	8.72e-07	6.27e-07	8.63708e-07	6.20946e-07	8.6523e-07	6.22103e-07	8.65695e-07	6.22448e-07	8.66268e-07	6.22846e-07	0.0159757
21	0.398925	0.350211	0.832158	999998056	1072	1.944e-06	1.072e-06	1.92471e-06	1.061e-06	1.92862e-06	1.06339e-06	1.92982e-06	1.06413e-06	1.931e-06	1.06473e-06	0.0168995
22	0.398925	0.35021	0.804167	999996280	1776	3.72e-06	1.776e-06	3.68126e-06	1.75656e-06	3.68982e-06	1.76121e-06	3.69261e-06	1.76279e-06	3.69472e-06	1.76372e-06	0.019459
23	0.398925	0.35021	0.82518	999993690	2590	6.31e-06	2.59001e-06	6.24092e-06	2.55967e-06	6.2573e-06	2.56749e-06	6.26311e-06	2.57051e-06	6.26649e-06	2.57178e-06	0.021007
24	0.398926	0.350209	0.833977	999990240	3450	9.76e-06	3.45002e-06	9.64761e-06	3.40671e-06	9.67579e-06	3.41851e-06	9.68673e-06	3.42365e-06	9.6918e-06	3.42534e-06	0.0215461
25	0.398926	0.350207	0.828742	999985697	4543	1.4303e-05	4.54304e-06	1.41296e-05	4.48201e-06	1.41749e-05	4.49918e-06	1.41942e-05	4.50756e-06	1.42018e-05	4.51006e-06	0.0224389
26	0.398927	0.350205	0.819307	999979669	6028	2.0331e-05	6.02809e-06	2.00712e-05	5.94167e-06	2.01411e-05	5.96624e-06	2.01738e-05	5.97965e-06	2.01855e-05	5.98381e-06	0.0240053
27	0.398928	0.350203	0.825951	999971833	7836	2.8167e-05	7.83616e-06	2.77876e-05	7.71662e-06	2.78913e-05	7.75035e-06	2.79445e-05	7.77088e-06	2.79632e-05	7.77786e-06	0.0255258
28	0.398929	0.3502	0.829554	999961861	9972	3.8139e-05	9.97228e-06	3.7598e-05	9.81068e-06	3.77465e-05	9.85546e-06	3.78298e-05	9.88557e-06	3.78602e-05	9.89719e-06	0.0268708
29	0.398931	0.350196	0.834816	999949099	12762	5.0901e-05	1.27625e-05	5.01409e-05	1.25434e-05	5.03482e-05	1.26023e-05	5.04753e-05	1.26459e-05	5.05246e-05	1.26649e-05	0.0287009
30	0.398933	0.350191	0.829405	999933085	16014	6.6915e-05	1.60148e-05	6.5864e-05	1.57239e-05	6.61471e-05	1.57997e-05	6.63346e-05	1.58602e-05	6.64135e-05	1.58897e-05	0.0302759
31	0.398936	0.350185	0.834189	999913033	20052	8.6967e-05	2.00533e-05	8.55311e-05	1.96684e-05	8.59116e-05	1.97659e-05	8.61809e-05	1.98476e-05	8.63044e-05	1.98922e-05	0.0320612
32	0.398939	0.350178	0.828301	999888367	24666	0.000111633	2.46681e-05	0.000109697	2.41684e-05	0.000110201	2.42918e-05	0.000110577	2.4398e-05	0.000110765	2.44627e-05	0.0335235
33	0.398943	0.350168	0.832302	999857421	30946	0.000142579	3.09495e-05	0.000139983	3.02885e-05	0.000140646	3.04479e-05	0.00014116	3.05869e-05	0.000141442	3.06803e-05	0.0359071
34	0.398948	0.350157	0.830949	999819405	38016	0.000180595	3.80214e-05	0.000177144	3.71663e-05	0.000178009	3.73686e-05	0.000178699	3.75441e-05	0.000179111	3.76741e-05	0.0378038
35	0.398954	0.350143	0.831792	999772586	46819	0.000227414	4.68275e-05	0.000222854	4.57188e-05	0.000223978	4.59768e-05	0.000224889	4.61983e-05	0.000225478	4.63753e-05	0.0400384
36	0.398961	0.350125	0.831593	999715042	57544	0.000284958	5.75571e-05	0.000278965	5.61236e-05	0.000280417	5.64523e-05	0.000281608	5.6732e-05	0.000282431	5.69666e-05	0.0424529
37	0.398971	0.350104	0.826093	999644562	70480	0.000355438	7.05001e-05	0.000347599	6.86537e-05	0.000349469	6.90718e-05	0.000351013	6.94246e-05	0.000352139	6.97281e-05	0.0449889
38	0.398982	0.350078	0.832701	999558026	86536	0.000441974	8.65668e-05	0.000431751	8.41823e-05	0.000434157	8.47181e-05	0.000436147	8.5164e-05	0.000437662	8.55526e-05	0.0479279
39	0.398996	0.350046	0.829599	999452173	105853	0.000547827	0.0001059	0.000534538	0.000102832	0.00053763	0.000103518	0.000540182	0.000104082	0.000542186	0.00010457	0.0510082
40	0.399013	0.350007	0.831582	999322548	129625	0.000677452	0.000129696	0.000660213	0.000125744	0.000664186	0.000126625	0.000667452	0.00012734	0.000670069	0.000127954	0.0544949
41	0.399033	0.349959	0.832599	999165154	157394	0.000834846	0.000157501	0.000812564	0.000152454	0.00081766	0.000153578	0.000821825	0.000154477	0.000825207	0.000155243	0.057888
42	0.399058	0.3499	0.832482	998973010	192144	0.00102699	0.000192305	0.000998229	0.000185821	0.00100477	0.000187268	0.00101008	0.000188408	0.00101442	0.000189371	0.0620006
43	0.399089	0.34983	0.831669	998739510	233500	0.00126049	0.00023374	0.00122344	0.000225442	0.00123184	0.000227302	0.00123859	0.000228749	0.00124414	0.000229952	0.0662997
44	0.399125	0.349744	0.830818	998457917	281593	0.00154208	0.000281948	0.0014945	0.000271401	0.00150528	0.00027378	0.00151385	0.000275607	0.00152089	0.000277107	0.0705756
45	0.39917	0.34964	0.831578	998115569	342348	0.00188443	0.000342877	0.00182333	0.00032934	0.00183719	0.000332429	0.00184809	0.000334759	0.00185702	0.000336648	0.0759871
46	0.399224	0.349515	0.829978	997702775	412794	0.00229722	0.000413573	0.0022189	0.000396315	0.00223676	0.00040032	0.00225061	0.000403273	0.00226189	0.000405635	0.0814265
47	0.399289	0.349365	0.82973	997205204	497571	0.0027948	0.000498717	0.00269449	0.000476686	0.00271755	0.000481902	0.00273515	0.000485655	0.00274938	0.000488613	0.0875519
48	0.399367	0.349183	0.829815	996605615	599589	0.00339439	0.000601269	0.00326599	0.000573106	0.00329586	0.000579924	0.00331822	0.000584707	0.00333617	0.000588429	0.0944853
49	0.39946	0.348966	0.830359	995890262	715353	0.00410974	0.000717789	0.00394575	0.000682072	0.00398445	0.000690937	0.00401285	0.000696995	0.00403543	0.000701646	0.101382
50	0.399571	0.348706	0.830549	995036787	853475	0.00496321	0.000856997	0.00475403	0.00081161	0.00480423	0.000823163	0.00484032	0.000830884	0.0048687	0.000836708	0.109267
51	0.399704	0.348398	0.829884	994024111	1012676	0.00597589	0.00101773	0.00570952	0.000960261	0.00577465	0.000975257	0.00582054	0.000985114	0.00585616	0.000992381	0.11767
52	0.39986	0.348033	0.829809	992824556	1199555	0.00717544	0.00120677	0.00683673	0.00113398	0.00692121	0.00115346	0.00697965	0.00116608	0.0070243	0.00117516	0.127127
53	0.400045	0.347602	0.829762	991411134	1413422	0.00858887	0.00142364	0.00815897	0.0013318	0.00826843	0.00135695	0.0083429	0.0013731	0.00839879	0.00138442	0.137317
54	0.400262	0.347097	0.828572	989752297	1658837	0.0102477	0.00167321	0.00970323	0.00155764	0.00984472	0.00158995	0.00993968	0.00161061	0.0100096	0.00162474	0.148516
55	0.400515	0.346505	0.828741	987814642	1937655	0.0121854	0.00195772	0.0114975	0.00181282	0.0116798	0.00185404	0.0118008	0.00188043	0.0118882	0.00189807	0.160729
56	0.400811	0.345814	0.828876	985559001	2255641	0.014441	0.00228347	0.0135741	0.00210226	0.013808	0.00215453	0.0139623	0.00218818	0.0140715	0.00221029	0.174304
57	0.401153	0.345013	0.828214	982949167	2609834	0.0170508	0.00264807	0.0159618	0.0024227	0.0162605	0.00248836	0.0164569	0.0025311	0.0165934	0.0025588	0.188908
58	0.401547	0.344088	0.828114	979946121	3003046	0.0200539	0.00305514	0.0186907	0.00277617	0.0190698	0.00285805	0.0193193	0.00291204	0.0194898	0.00294668	0.204729
59	0.401999	0.343025	0.826924	976500569	3445552	0.0234994	0.00351606	0.0217987	0.00317165	0.0222773	0.00327321	0.0225934	0.0033411	0.0228065	0.00338453	0.222436
60	0.402516	0.341807	0.826707	972568552	3932017	0.0274314	0.00402664	0.0253178	0.0036038	0.0259183	0.00372861	0.0263172	0.00381339	0.0265833	0.00386767	0.241659
61	0.403104	0.34042	0.825991	968104801	4463751	0.0318952	0.00458965	0.0292794	0.00407334	0.0300279	0.00422544	0.0305289	0.0043305	0.0308607	0.00439813	0.262531
62	0.403768	0.338846	0.82494	963064498	5040303	0.0369355	0.00520636	0.0337127	0.00457933	0.0346392	0.00476325	0.0352652	0.00489234	0.0356784	0.00497637	0.285109
63	0.404517	0.337066	0.824375	957391563	5672935	0.0426084	0.0058905	0.0386544	0.00513128	0.0397941	0.00535264	0.0405721	0.00551051	0.0410856	0.00561459	0.310123
64	0.405356	0.335063	0.823425	951046337	6345226	0.0489537	0.00662762	0.0441249	0.00571393	0.0455178	0.00597841	0.0464791	0.00616985	0.0471151	0.00629783	0.336787
65	0.40629	0.332821	0.822404	943987122	7059215	0.0560129	0.00742258	0.0501439	0.00632875	0.0518357	0.00664313	0.0530158	0.0068732	0.0538004	0.00702948	0.365395
66	0.407327	0.330322	0.82086	936171021	7816101	0.063829	0.00827988	0.0567295	0.00697638	0.0587726	0.00734844	0.0602117	0.00762283	0.0611752	0.00781236	0.396198
67	0.408472	0.327545	0.819807	927555872	8615149	0.0724441	0.00920254	0.0638961	0.00765527	0.0663501	0.00809423	0.0680936	0.00841931	0.0692707	0.00864749	0.429365
68	0.409731	0.324472	0.818326	918103470	9452402	0.0818965	0.0101907	0.0716514	0.00836097	0.0745842	0.00887718	0.0766829	0.00926015	0.0781134	0.00953326	0.464923
69	0.411106	0.321091	0.816239	907795939	10307531	0.0922041	0.011227	0.0799825	0.00907432	0.0834708	0.00967923	0.0859807	0.0101272	0.087709	0.0104515	0.502132
70	0.412602	0.317379	0.814621	896599507	11196432	0.1034	0.0123336	0.0888861	0.00980784	0.0930172	0.0105161	0.0960014	0.0110385	0.0980767	0.0114208	0.542035
71	0.414221	0.313326	0.8126	884505551	12093956	0.115494	0.0134887	0.0983342	0.0105377	0.103207	0.0113652	0.106735	0.0119713	0.109211	0.0124183	0.583702
72	0.415963	0.308915	0.810095	871499165	13006386	0.128501	0.0147047	0.108299	0.0112664	0.114027	0.0122323	0.118175	0.0129337	0.12111	0.0134532	0.627725
73	0.417828	0.304137	0.807575	857589611	13909554	0.14241	0.0159605	0.118731	0.01197	0.125439	0.0130949	0.130292	0.0139033	0.13375	0.0145031	0.673242
74	0.419813	0.298979	0.804942	842776644	14812967	0.157223	0.0172728	0.129583	0.0126541	0.137412	0.0139609	0.143062	0.0148916	0.147112	0.0155808	0.721005
75	0.421913	0.293438	0.80168	827091245	15685399	0.172909	0.0186116	0.140784	0.0132899	0.149885	0.0148001	0.156436	0.0158689	0.16115	0.0166572	0.769796
76	0.424122	0.287507	0.798244	810551263	16539982	0.189449	0.0199978	0.152268	0.0138853	0.162806	0.0156228	0.170372	0.0168495	0.175829	0.0177481	0.820522
77	0.42643	0.281187	0.79427	793203084	17348179	0.206797	0.0214029	0.163948	0.0144103	0.176098	0.0163984	0.184804	0.0178044	0.191088	0.0188253	0.872044
78	0.428826	0.274475	0.790425	775084173	18118911	0.224916	0.0228427	0.17574	0.0148655	0.189687	0.0171315	0.19967	0.0187414	0.206872	0.0198985	0.92503
79	0.431297	0.267375	0.785637	756236868	18847305	0.243763	0.0243165	0.187552	0.0152406	0.203494	0.0178144	0.214903	0.019654	0.223121	0.0209642	0.979472
80	0.433822	0.2599	0.780622	736740475	19496393	0.26326	0.0257808	0.199274	0.0155002	0.217416	0.0184092	0.230407	0.0205012	0.239744	0.0219816	1.03364
81	0.436379	0.25207	0.775025	716673563	20066912	0.283326	0.0272374	0.210796	0.015639	0.231349	0.018912	0.246084	0.0212786	0.256652	0.0229494	1.08763
82	0.438945	0.243899	0.768796	696105094	20568469	0.303895	0.0286999	0.222016	0.0156557	0.245198	0.0193232	0.261843	0.0219892	0.273762	0.0238745	1.14199
83	0.441486	0.235417	0.762483	675138777	20966317	0.324861	0.0301195	0.232817	0.0155168	0.258842	0.019601	0.277567	0.0225889	0.290964	0.0247117	1.19481
84	0.443972	0.226652	0.755104	653851723	21287054	0.346148	0.0315299	0.243107	0.0152406	0.272184	0.0197617	0.293162	0.023099	0.308169	0.0254844	1.24743
85	0.446362	0.217644	0.747153	632354558	21497165	0.367645	0.0328777	0.252787	0.014805	0.285109	0.0197671	0.308512	0.0234768	0.325264	0.0261447	1.29774
86	0.448617	0.208439	0.738377	610748089	21606469	0.389252	0.0341683	0.26178	0.0142205	0.297515	0.0196186	0.323514	0.0237244	0.342144	0.0266931	1.34597
87	0.450688	0.199078	0.729091	589129279	21618810	0.410871	0.0353973	0.270021	0.0134947	0.309308	0.019309	0.33807	0.0238324	0.358708	0.0271205	1.39194
88	0.45253	0.189622	0.718549	567608281	21520998	0.432392	0.0365302	0.277461	0.0126274	0.320395	0.0188194	0.352075	0.0237729	0.374848	0.0273967	1.43431
89	0.454089	0.180125	0.707253	546285294	21322987	0.453715	0.0375664	0.284066	0.0116379	0.330702	0.0181585	0.36544	0.0235451	0.390469	0.0275213	1.47305
90	0.455313	0.170649	0.694736	525256692	21028602	0.474743	0.0384938	0.289828	0.0105475	0.340171	0.017334	0.378083	0.0231436	0.405485	0.0274871	1.50769
91	0.456146	0.161258	0.681397	504626329	20630363	0.495374	0.0392767	0.294754	0.00937869	0.348757	0.0163466	0.389928	0.0225517	0.419809	0.0272714	1.53682
92	0.456537	0.152018	0.666633	484482615	20143714	0.515517	0.0399181	0.298878	0.00817103	0.356437	0.0152182	0.400917	0.0217751	0.433372	0.0268762	1.56057
93	0.456438	0.142986	0.650677	464898986	19583629	0.535101	0.0404217	0.302252	0.00696547	0.363206	0.0139726	0.411006	0.0208243	0.446116	0.0263055	1.57908
94	0.455796	0.134213	0.633745	445935532	18963454	0.554064	0.0407905	0.304949	0.00580081	0.369081	0.0126367	0.420172	0.0197169	0.458002	0.0255658	1.59245
95	0.454579	0.125767	0.615077	427675254	18260278	0.572325	0.0409482	0.307047	0.00470352	0.374084	0.01122	0.428395	0.0184392	0.46898	0.0246193	1.5977
96	0.452751	0.117681	0.595631	410148361	17526893	0.589852	0.0409818	0.308635	0.00371459	0.378269	0.00978583	0.435689	0.0170562	0.479044	0.0235307	1.59823
97	0.450303	0.110004	0.574338	393407241	16741120	0.606593	0.0408172	0.309805	0.00285068	0.381696	0.00835508	0.442071	0.015561	0.488176	0.0222656	1.59114
98	0.447233	0.102767	0.551769	377477693	15929548	0.622522	0.0404912	0.310641	0.00212741	0.384441	0.00697745	0.447578	0.0139966	0.496383	0.0208601	1.57785
99	0.443557	0.0959933	0.527808	362376930	15100763	0.637623	0.0400044	0.311224	0.00154397	0.386589	0.00568902	0.452256	0.0123932	0.503682	0.0193369	1.55838
100	0.439307	0.0896929	0.502824	348106193	14270737	0.651894	0.0393809	0.31162	0.00109144	0.388228	0.00452349	0.456166	0.0107906	0.510108	0.0177334	1.53367
101	0.434534	0.0838673	0.477071	334658890	13447303	0.665341	0.0386299	0.311882	0.000752124	0.389447	0.00350141	0.459377	0.00922424	0.515705	0.0160774	1.50405
102	0.429309	0.0785128	0.45034	322018857	12640033	0.677981	0.0377699	0.312051	0.000504795	0.390329	0.00263785	0.461965	0.00773131	0.520524	0.0143992	1.47026
103	0.423729	0.0736182	0.422718	310159352	11859505	0.689841	0.0368286	0.312157	0.000329248	0.390953	0.00193497	0.464008	0.00634631	0.524623	0.0127305	1.43336
104	0.417879	0.0691587	0.395515	299044728	11114624	0.700955	0.0358352	0.312221	0.000208382	0.391382	0.00138306	0.465589	0.00509612	0.528066	0.0111016	1.39448
105	0.411875	0.0651125	0.368126	288637670	10407058	0.711362	0.034801	0.312259	0.00012772	0.39167	0.00096451	0.466784	0.00399742	0.530918	0.00953565	1.35405
106	0.405825	0.0614504	0.341177	278890570	9747100	0.721109	0.0337693	0.312281	7.56433e-05	0.39186	0.000657489	0.467668	0.00306085	0.533245	0.00806361	1.31376
107	0.399826	0.0581374	0.315297	269748584	9141986	0.730251	0.0327798	0.312293	4.31055e-05	0.391982	0.000438102	0.468306	0.00228934	0.535117	0.00670987	1.27513
108	0.393971	0.0551438	0.290634	261169098	8579486	0.738831	0.0318055	0.3123	2.36951e-05	0.392059	0.000284341	0.468757	0.00167106	0.536595	0.00548072	1.23712
109	0.388344	0.0524369	0.26739	253099838	8069260	0.7469	0.0308967	0.312303	1.23587e-05	0.392106	0.000179664	0.469068	0.00119246	0.537743	0.00439382	1.20168
110	0.383005	0.049985	0.245902	245492349	7607489	0.754508	0.0300573	0.312304	6.16174e-06	0.392133	0.00011031	0.469279	0.000833037	0.538616	0.00345253	1.16895
111	0.377991	0.0477566	0.226342	238296515	7195834	0.761703	0.0293118	0.312305	2.93118e-06	0.39215	6.56585e-05	0.469419	0.000570702	0.539269	0.00265683	1.1399
112	0.373336	0.0457254	0.208406	231468412	6828103	0.768532	0.0286538	0.312305	1.28942e-06	0.392159	3.76798e-05	0.469511	0.000382958	0.539746	0.00200118	1.11425
113	0.369038	0.0438674	0.192526	224976420	6491992	0.775024	0.028047	0.312306	5.6094e-07	0.392163	2.0895e-05	0.469569	0.00025074	0.540087	0.00147359	1.09061
114	0.36508	0.0421562	0.178623	218776810	6199610	0.781223	0.0275567	0.312306	1.37784e-07	0.392166	1.10227e-05	0.469605	0.000160242	0.540326	0.00106355	1.0715
115	0.361451	0.0405735	0.166105	212837337	5939473	0.787163	0.0271485	0.312306	0	0.392167	5.56545e-06	0.469626	9.96352e-05	0.540491	0.000752422	1.05559
116	0.358119	0.0391021	0.155146	207132570	5704767	0.792867	0.0268034	0.312306	0	0.392168	2.68034e-06	0.469639	6.00396e-05	0.540602	0.000521862	1.04215
117	0.355044	0.0377257	0.145558	201635608	5496962	0.798364	0.0265384	0.312306	0	0.392168	1.19423e-06	0.469646	3.4898e-05	0.540675	0.000354685	1.03182
118	0.352208	0.0364327	0.136989	196326100	5309508	0.803674	0.0263322	0.312306	0	0.392168	5.26644e-07	0.46965	1.96175e-05	0.540723	0.00023541	1.02378
119	0.349561	0.0352128	0.129577	191194124	5131976	0.808806	0.0261401	0.312306	0	0.392168	1.307e-07	0.469652	1.0456e-05	0.540752	0.000152004	1.01629
120	0.347072	0.0340563	0.122879	186218145	4975979	0.813782	0.0260258	0.312306	0	0.392168	0	0.469653	5.33529e-06	0.540771	9.55147e-05	1.01183
