# Supplementary material for: Quantifying the Potential for Future Gene Therapy to Lower Lifetime Risk of Polygenic Late-Onset Diseases
Source: MDPI journal article supplement (doi:10.3390/ijms20133352), 2019-07-08
Supplement: s2 [file s2 › SuppFiles/Results/LODsRareMedium/T2D/-1.000/IndividualsByBetaDistrib.csv]

nEntry	Beta	nDetrimentalCount	nFractionPopulation	nCumulativeFractionPopulation	nEditsNeeded	nIndividuals
0	-19.8	0	0	1	0	0
1	-19.6	0	0	1	0	0
2	-19.4	0	0	1	0	0
3	-19.2	0	0	1	0	0
4	-19	0	0	1	0	0
5	-18.8	0	0	1	0	0
6	-18.6	0	0	1	0	0
7	-18.4	0	0	1	0	0
8	-18.2	0	0	1	0	0
9	-18	0	0	1	0	0
10	-17.8	0	0	1	0	0
11	-17.6	0	0	1	0	0
12	-17.4	0	0	1	0	0
13	-17.2	0	0	1	0	0
14	-17	0	0	1	0	0
15	-16.8	0	0	1	0	0
16	-16.6	0	0	1	0	0
17	-16.4	0	0	1	0	0
18	-16.2	0	0	1	0	0
19	-16	0	0	1	0	0
20	-15.8	0	0	1	0	0
21	-15.6	0	0	1	0	0
22	-15.4	0	0	1	0	0
23	-15.2	0	0	1	0	0
24	-15	0	0	1	0	0
25	-14.8	0	0	1	0	0
26	-14.6	0	0	1	0	0
27	-14.4	0	0	1	0	0
28	-14.2	0	0	1	0	0
29	-14	0	0	1	0	0
30	-13.8	0	0	1	0	0
31	-13.6	0	0	1	0	0
32	-13.4	0	0	1	0	0
33	-13.2	0	0	1	0	0
34	-13	2	1e-09	1	0	1
35	-12.8	0	0	1	0	0
36	-12.6	3	1e-09	1	0	1
37	-12.4	4	1e-09	1	0	1
38	-12.2	5	4e-09	1	0	4
39	-12	5.5	6e-09	0.99999999	0	6
40	-11.8	5.9231	1.3e-08	0.99999999	0	13
41	-11.6	5.9655	2.9e-08	0.99999997	0	29
42	-11.4	6.75	5.2e-08	0.99999995	0	52
43	-11.2	7.0092	1.09e-07	0.99999989	0	109
44	-11	7.4641	1.81e-07	0.99999978	0	181
45	-10.8	7.8	2.9e-07	0.9999996	0	290
46	-10.6	8.209	5.98e-07	0.99999931	0	598
47	-10.4	8.6383	9.98e-07	0.99999872	0	998
48	-10.2	9.1355	1.69e-06	0.99999772	0	1690
49	-10	9.4841	2.706e-06	0.99999603	0	2706
50	-9.8	9.8856	4.345e-06	0.99999332	0	4345
51	-9.6	10.367	7.044e-06	0.99998898	0	7044
52	-9.4	10.706	1.0826e-05	0.99998193	0	10826
53	-9.2	11.128	1.6029e-05	0.99997111	0	16029
54	-9	11.579	2.4198e-05	0.99995508	0	24198
55	-8.8	11.929	3.5478e-05	0.99993088	0	35478
56	-8.6	12.35	5.1337e-05	0.9998954	0	51337
57	-8.4	12.763	7.4805e-05	0.99984406	0	74805
58	-8.2	13.128	0.000104696	0.99976926	0	104696
59	-8	13.552	0.00014488	0.99966456	0	144880
60	-7.8	13.949	0.00020154	0.99951968	0	201540
61	-7.6	14.322	0.000270074	0.99931814	0	270074
62	-7.4	14.742	0.000363112	0.99904807	0	363112
63	-7.2	15.126	0.000479567	0.99868496	0	479567
64	-7	15.516	0.000624605	0.99820539	0	624605
65	-6.8	15.919	0.000808193	0.99758079	0	808193
66	-6.6	16.297	0.001038229	0.99677259	0	1038229
67	-6.4	16.683	0.001301742	0.99573436	0	1301742
68	-6.2	17.08	0.001643768	0.99443262	0	1643768
69	-6	17.463	0.00203827	0.99278885	0	2038270
70	-5.8	17.853	0.002503617	0.99075058	0	2503617
71	-5.6	18.241	0.003041368	0.98824697	0	3041368
72	-5.4	18.625	0.003659223	0.9852056	0	3659223
73	-5.2	19.017	0.004347565	0.98154637	0	4347565
74	-5	19.4	0.005174011	0.97719881	0	5174011
75	-4.8	19.771	0.006032347	0.9720248	0	6032347
76	-4.6	20.16	0.007046107	0.96599245	0	7046107
77	-4.4	20.545	0.008120707	0.95894634	0	8120707
78	-4.2	20.924	0.009297483	0.95082564	0	9297483
79	-4	21.308	0.010521292	0.94152815	0	10521292
80	-3.8	21.685	0.011863112	0.93100686	0	11863112
81	-3.6	22.067	0.013204341	0.91914375	0	13204341
82	-3.4	22.442	0.014685059	0.90593941	0	14685059
83	-3.2	22.823	0.016166923	0.89125435	0	16166923
84	-3	23.201	0.017672229	0.87508743	0	17672229
85	-2.8	23.583	0.01913069	0.8574152	0	19130690
86	-2.6	23.954	0.020624619	0.83828451	0	20624619
87	-2.4	24.334	0.022010691	0.81765989	0	22010691
88	-2.2	24.707	0.02343687	0.7956492	0	23436870
89	-2	25.085	0.024735325	0.77221233	0	24735325
90	-1.8	25.458	0.02592974	0.747477	0	25929740
91	-1.6	25.835	0.027062466	0.72154726	0	27062466
92	-1.4	26.208	0.027990594	0.6944848	0	27990594
93	-1.2	26.587	0.028751499	0.6664942	0	28751499
94	-1	26.953	0.029365801	0.6377427	0	29365801
95	-0.8	27.329	0.029949531	0.6083769	0	29949531
96	-0.6	27.699	0.030209845	0.57842737	0	30209845
97	-0.4	28.074	0.030379876	0.54821753	0	30379876
98	-0.2	28.447	0.030290848	0.51783765	0	30290848
99	0	28.818	0.030160556	0.4875468	0	30160556
100	0.2	29.186	0.029701893	0.45738625	0.3678	29701893
101	0.4	29.561	0.029183089	0.42768436	0.74287	29183089
102	0.6	29.928	0.028459037	0.39850127	1.1104	28459037
103	0.8	30.301	0.027719533	0.37004223	1.4827	27719533
104	1	30.669	0.026750846	0.3423227	1.8511	26750846
105	1.2	31.041	0.025701008	0.31557185	2.2235	25701008
106	1.4	31.41	0.024509337	0.28987084	2.5923	24509337
107	1.6	31.778	0.023414681	0.2653615	2.9599	23414681
108	1.8	32.144	0.02207469	0.24194682	3.3266	22074690
109	2	32.514	0.020860099	0.21987213	3.6962	20860099
110	2.2	32.881	0.019504427	0.19901204	4.0636	19504427
111	2.4	33.25	0.018213704	0.17950761	4.4325	18213704
112	2.6	33.621	0.016857002	0.1612939	4.8029	16857002
113	2.8	33.985	0.015602285	0.1444369	5.1672	15602285
114	3	34.352	0.014300087	0.12883462	5.5339	14300087
115	3.2	34.717	0.013113694	0.11453453	5.8987	13113694
116	3.4	35.087	0.011940002	0.10142084	6.2689	11940002
117	3.6	35.452	0.010831442	0.089480834	6.6341	10831442
118	3.8	35.819	0.009763647	0.078649392	7.0009	9763647
119	4	36.182	0.008774207	0.068885745	7.3643	8774207
120	4.2	36.552	0.007832025	0.060111538	7.734	7832025
121	4.4	36.911	0.006999832	0.052279513	8.0933	6999832
122	4.6	37.279	0.006186071	0.045279681	8.4613	6186071
123	4.8	37.643	0.005464903	0.03909361	8.8256	5464903
124	5	38.012	0.004808525	0.033628707	9.1939	4808525
125	5.2	38.37	0.004215429	0.028820182	9.5523	4215429
126	5.4	38.74	0.003660494	0.024604753	9.9224	3660494
127	5.6	39.097	0.003182782	0.020944259	10.279	3182782
128	5.8	39.467	0.002752796	0.017761477	10.649	2752796
129	6	39.824	0.002372492	0.015008681	11.007	2372492
130	6.2	40.194	0.002033987	0.012636189	11.377	2033987
131	6.4	40.554	0.001735767	0.010602202	11.737	1735767
132	6.6	40.924	0.001478505	0.008866435	12.106	1478505
133	6.8	41.281	0.001253373	0.00738793	12.463	1253373
134	7	41.648	0.001056082	0.006134557	12.83	1056082
135	7.2	42.003	0.000889738	0.005078475	13.185	889738
136	7.4	42.37	0.000746015	0.004188737	13.552	746015
137	7.6	42.728	0.000623657	0.003442722	13.91	623657
138	7.8	43.095	0.000517384	0.002819065	14.277	517384
139	8	43.453	0.000428955	0.002301681	14.635	428955
140	8.2	43.825	0.000354324	0.001872726	15.007	354324
141	8.4	44.176	0.000291237	0.001518402	15.358	291237
142	8.6	44.541	0.000238588	0.001227165	15.723	238588
143	8.8	44.901	0.00019452	0.000988577	16.083	194520
144	9	45.269	0.000158278	0.000794057	16.452	158278
145	9.2	45.616	0.0001286	0.000635779	16.799	128600
146	9.4	45.987	0.000104165	0.000507179	17.169	104165
147	9.6	46.337	8.3654e-05	0.000403014	17.519	83654
148	9.8	46.704	6.6881e-05	0.00031936	17.886	66881
149	10	47.067	5.3269e-05	0.000252479	18.249	53269
150	10.2	47.419	4.2825e-05	0.00019921	18.601	42825
151	10.4	47.787	3.3905e-05	0.000156385	18.969	33905
152	10.6	48.146	2.6688e-05	0.00012248	19.329	26688
153	10.8	48.497	2.117e-05	9.5792e-05	19.68	21170
154	11	48.849	1.6875e-05	7.4622e-05	20.031	16875
155	11.2	49.212	1.3086e-05	5.7747e-05	20.395	13086
156	11.4	49.575	1.0343e-05	4.4661e-05	20.758	10343
157	11.6	49.888	8.001e-06	3.4318e-05	21.07	8001
158	11.8	50.268	6.059e-06	2.6317e-05	21.45	6059
159	12	50.64	4.731e-06	2.0258e-05	21.822	4731
160	12.2	51.071	3.71e-06	1.5527e-05	22.253	3710
161	12.4	51.379	2.816e-06	1.1817e-05	22.561	2816
162	12.6	51.645	2.14e-06	9.001e-06	22.827	2140
163	12.8	52.137	1.695e-06	6.861e-06	23.32	1695
164	13	52.504	1.301e-06	5.166e-06	23.686	1301
165	13.2	52.71	9.78e-07	3.865e-06	23.892	978
166	13.4	53.171	7.41e-07	2.887e-06	24.354	741
167	13.6	53.434	5.23e-07	2.146e-06	24.616	523
168	13.8	54.048	4.39e-07	1.623e-06	25.23	439
169	14	54.186	2.96e-07	1.184e-06	25.368	296
170	14.2	54.676	2.13e-07	8.88e-07	25.858	213
171	14.4	54.815	1.73e-07	6.75e-07	25.997	173
172	14.6	55.441	1.11e-07	5.02e-07	26.624	111
173	14.8	55.865	1.04e-07	3.91e-07	27.048	104
174	15	56.236	7.2e-08	2.87e-07	27.418	72
175	15.2	56.045	6.6e-08	2.15e-07	27.228	66
176	15.4	57.029	3.5e-08	1.49e-07	28.211	35
177	15.6	57.103	3.9e-08	1.14e-07	28.285	39
178	15.8	57.524	2.1e-08	7.5e-08	28.706	21
179	16	57.056	1.8e-08	5.4e-08	28.238	18
180	16.2	58.75	8e-09	3.6e-08	29.932	8
181	16.4	58.75	4e-09	2.8e-08	29.932	4
182	16.6	60	7e-09	2.4e-08	31.182	7
183	16.8	60.75	4e-09	1.7e-08	31.932	4
184	17	59	3e-09	1.3e-08	30.182	3
185	17.2	59	4e-09	1e-08	30.182	4
186	17.4	59.5	2e-09	6e-09	30.682	2
187	17.6	61	1e-09	4e-09	32.182	1
188	17.8	66	1e-09	3e-09	37.182	1
189	18	62.5	2e-09	2e-09	33.682	2
190	18.2	0	0	0	0	0
191	18.4	0	0	0	0	0
192	18.6	0	0	0	0	0
193	18.8	0	0	0	0	0
194	19	0	0	0	0	0
195	19.2	0	0	0	0	0
196	19.4	0	0	0	0	0
197	19.6	0	0	0	0	0
198	19.8	0	0	0	0	0
199	20	0	0	0	0	0
