# Supplementary material for: Quantifying the Potential for Future Gene Therapy to Lower Lifetime Risk of Polygenic Late-Onset Diseases
Source: MDPI journal article supplement (doi:10.3390/ijms20133352), 2019-07-08
Supplement: s2 [file s2 › SuppFiles/Results/LODsRareMedium/T2D/0.250/FrailtyAnalysis.csv]

Age	Heritability	MeanOR	CaseOR	nControls	nCases	nCumIncidence	nIncidence	nLifeIncidence0	nAbsIncidence0	nLifeIncidence5	nAbsIncidence5	nLifeIncidence10	nAbsIncidence10	nLifeIncidence15	nAbsIncidence15	nIncActDivExp
19	0.677578	0.249963	742.147	999994705	5295	5.295e-06	5.295e-06	5.24663e-06	5.24663e-06	5.25452e-06	5.25452e-06	5.25711e-06	5.25711e-06	5.2609e-06	5.2609e-06	0.290356
20	0.677557	0.249941	535.197	999983245	11460	1.6755e-05	1.14601e-05	1.6596e-05	1.13494e-05	1.6625e-05	1.13705e-05	1.66339e-05	1.13768e-05	1.6645e-05	1.13841e-05	0.291997
21	0.677523	0.249904	441.361	999963732	19513	3.6268e-05	1.95133e-05	3.59088e-05	1.93128e-05	3.59812e-05	1.93562e-05	3.60036e-05	1.93697e-05	3.60257e-05	1.93807e-05	0.307617
22	0.677475	0.249852	376.861	999935225	28507	6.4775e-05	2.8508e-05	6.41036e-05	2.81948e-05	6.42508e-05	2.82695e-05	6.42985e-05	2.82949e-05	6.43356e-05	2.83099e-05	0.312352
23	0.677412	0.249782	327.906	999895966	39259	0.000104034	3.92615e-05	0.000102903	3.87991e-05	0.000103168	3.89176e-05	0.000103262	3.89634e-05	0.000103318	3.89826e-05	0.318441
24	0.677332	0.24969	296.515	999844194	51772	0.000155806	5.17774e-05	0.000154025	5.1122e-05	0.000154467	5.12991e-05	0.000154638	5.13762e-05	0.00015472	5.14016e-05	0.32336
25	0.677232	0.249575	268.673	999777916	66278	0.000222084	6.62883e-05	0.000219412	6.53876e-05	0.000220106	6.56381e-05	0.000220398	6.57604e-05	0.000220517	6.57968e-05	0.327409
26	0.67711	0.24943	239.056	999693660	84256	0.00030634	8.42747e-05	0.00030246	8.30482e-05	0.000303497	8.33915e-05	0.000303977	8.3579e-05	0.000304154	8.36371e-05	0.335602
27	0.676965	0.249255	217.415	999590184	103476	0.000409816	0.000103508	0.000404358	0.000101897	0.00040584	0.000102343	0.000406591	0.000102614	0.00040686	0.000102706	0.33717
28	0.676792	0.249043	195.987	999462515	127669	0.000537485	0.000127721	0.000529958	0.0001256	0.000532013	0.000126173	0.00053315	0.000126559	0.000533567	0.000126708	0.344151
29	0.676587	0.248789	176.735	999307052	155463	0.000692948	0.000155547	0.000682752	0.000152794	0.000685525	0.000153511	0.000687193	0.000154043	0.000687842	0.000154274	0.349801
30	0.67635	0.248489	159.626	999120460	186592	0.00087954	0.000186721	0.000865954	0.000183203	0.00086961	0.000184085	0.000871984	0.00018479	0.000872977	0.000185135	0.352995
31	0.676073	0.248133	145.628	998896105	224355	0.00110389	0.000224553	0.001086	0.000220049	0.00109075	0.000221139	0.00109404	0.000222053	0.00109553	0.000222552	0.359014
32	0.675752	0.247716	133.503	998628448	267657	0.00137155	0.000267953	0.00134824	0.000262234	0.00135432	0.000263574	0.00135876	0.000264726	0.00136096	0.000265427	0.364142
33	0.675384	0.247229	121.294	998311253	317195	0.00168875	0.000317631	0.00165866	0.000310421	0.00166638	0.000312055	0.00167224	0.000313479	0.00167539	0.000314437	0.368511
34	0.674963	0.246664	110.187	997937333	373920	0.00206267	0.000374553	0.00202417	0.000365511	0.00203388	0.0003675	0.00204147	0.000369225	0.0020459	0.000370504	0.372408
35	0.674482	0.246009	100.182	997495466	441867	0.00250453	0.00044278	0.00245557	0.000431406	0.00246772	0.00043384	0.0024774	0.000435931	0.0024835	0.000437601	0.378586
36	0.673932	0.245251	91.8176	996976448	519018	0.00302355	0.000520321	0.00296167	0.000506092	0.00297677	0.000509055	0.00298898	0.000511578	0.00299719	0.000513693	0.383778
37	0.67331	0.244383	83.2388	996369781	606667	0.00363022	0.000608507	0.00355244	0.000590778	0.00357115	0.000594376	0.00358639	0.000597412	0.00359722	0.000600024	0.388312
38	0.672607	0.243388	75.4596	995661157	708624	0.00433884	0.000711206	0.00424155	0.000689105	0.00426464	0.000693491	0.00428353	0.000697141	0.00429754	0.000700322	0.393761
39	0.671816	0.242255	68.6832	994838606	822551	0.00516139	0.000826135	0.00504027	0.000798722	0.00506869	0.000804052	0.00509196	0.000808428	0.00510976	0.000812224	0.39792
40	0.670925	0.240963	62.0938	993880557	958049	0.00611944	0.00096302	0.00596913	0.000928857	0.00600406	0.000935367	0.0060326	0.000940646	0.00605494	0.000945178	0.404636
41	0.669925	0.239501	56.4399	992773250	1107307	0.00722675	0.00111412	0.00704095	0.00107182	0.00708379	0.00107973	0.00711866	0.00108605	0.00714637	0.00109143	0.409487
42	0.668806	0.23785	51.2241	991494532	1278718	0.00850547	0.00128803	0.00827656	0.00123561	0.00832902	0.00124523	0.00837147	0.00125281	0.00840558	0.00125921	0.41527
43	0.66756	0.235995	46.3239	990024228	1470304	0.00997577	0.00148292	0.00969467	0.00141811	0.00975882	0.0014298	0.00981037	0.00143891	0.00985206	0.00144648	0.420625
44	0.666175	0.233918	41.8226	988337148	1687080	0.0116629	0.00170408	0.0113186	0.00162397	0.011397	0.00163821	0.0114595	0.00164914	0.0115102	0.00165811	0.426555
45	0.664638	0.231603	37.8521	986408356	1928792	0.0135916	0.00195155	0.0131713	0.00185264	0.013267	0.00187002	0.0133426	0.00188313	0.0134039	0.00189376	0.432496
46	0.662946	0.229042	34.0852	984215349	2193007	0.0157847	0.00222322	0.0152728	0.00210149	0.0153898	0.00212273	0.015481	0.00213839	0.0155548	0.00215091	0.43772
47	0.661083	0.226217	30.7845	981730083	2485266	0.0182699	0.00252512	0.0176482	0.00237548	0.0177913	0.00240148	0.0179012	0.00242018	0.0179898	0.00243491	0.443297
48	0.65904	0.223118	27.6801	978920273	2809810	0.0210797	0.0028621	0.0203264	0.0026782	0.0205013	0.00271006	0.0206336	0.00273241	0.0207396	0.00274981	0.449759
49	0.656809	0.219738	24.9168	975762192	3158081	0.0242378	0.00322609	0.0233274	0.00300093	0.0235413	0.00303994	0.0237002	0.00306659	0.0238266	0.00308706	0.455657
50	0.654377	0.216071	22.4358	972224752	3537440	0.0277752	0.00362531	0.0266775	0.0033501	0.026939	0.00339778	0.0271299	0.00342965	0.0272803	0.00345369	0.462228
51	0.651749	0.212127	20.0906	968289238	3935514	0.0317108	0.00404795	0.0303908	0.0037133	0.0307103	0.00377129	0.0309393	0.0038094	0.0311178	0.0038375	0.468024
52	0.648918	0.207911	18.0052	963932407	4356831	0.0360676	0.00449951	0.0344848	0.00409405	0.0348747	0.00416437	0.0351492	0.00420994	0.0353605	0.00424273	0.474002
53	0.645879	0.203433	16.1311	959132670	4799737	0.0408673	0.00497933	0.0389749	0.00449011	0.0394496	0.00457492	0.0397786	0.00462935	0.0400281	0.00466753	0.480282
54	0.642637	0.198715	14.4321	953880844	5251826	0.0461192	0.0054756	0.043864	0.00488908	0.0444401	0.0049905	0.0448339	0.00505536	0.0451277	0.00509968	0.48602
55	0.639193	0.193772	12.8883	948157289	5723555	0.0518427	0.00600028	0.0491639	0.00529993	0.0498605	0.00542044	0.0503315	0.00549759	0.0506769	0.00554916	0.492625
56	0.635563	0.188642	11.483	941964931	6192358	0.0580351	0.00653094	0.0548649	0.00570096	0.0557032	0.00584271	0.0562654	0.00593395	0.0566708	0.00599392	0.498525
57	0.631743	0.183342	10.2515	935294314	6670617	0.0647057	0.0070816	0.0609678	0.00610288	0.0619715	0.00626828	0.0626414	0.00637594	0.0631165	0.00644572	0.505186
58	0.627754	0.177915	9.1234	928156787	7137527	0.0718432	0.00763132	0.0674536	0.0064858	0.0686486	0.00667709	0.0694446	0.00680321	0.0700007	0.00688414	0.511384
59	0.623609	0.172392	8.11148	920555559	7601228	0.0794444	0.00818959	0.0743102	0.00685665	0.0757248	0.00707621	0.0766676	0.00722299	0.0773176	0.00731687	0.518097
60	0.619332	0.166812	7.20522	912512626	8042933	0.0874874	0.00873704	0.0815086	0.00719834	0.0831725	0.00744764	0.0842846	0.00761698	0.085043	0.0077254	0.524354
61	0.614934	0.161208	6.41231	904047115	8465511	0.0959529	0.00927714	0.0890218	0.00751318	0.0909662	0.00779373	0.0922721	0.00798751	0.0931552	0.00811225	0.530659
62	0.61044	0.155616	5.69271	895179687	8867428	0.10482	0.00980859	0.0968212	0.00779948	0.0990789	0.00811272	0.100605	0.00833259	0.101631	0.00847571	0.537136
63	0.605869	0.150066	5.06364	885941096	9238591	0.114059	0.0103204	0.104869	0.00804783	0.107474	0.00839502	0.109247	0.00864261	0.110437	0.00880586	0.543346
64	0.601243	0.14459	4.50779	876366587	9574509	0.123633	0.0108072	0.113124	0.00825457	0.116111	0.00863664	0.11816	0.0089132	0.119535	0.00909808	0.549173
65	0.596569	0.139201	4.02016	866468967	9897620	0.133531	0.0112939	0.121563	0.00843906	0.124969	0.00885827	0.127326	0.00916505	0.128908	0.00937344	0.555971
66	0.591878	0.133932	3.58708	856300306	10168661	0.1437	0.0117357	0.13013	0.00856781	0.133994	0.00902474	0.136687	0.00936173	0.138503	0.00959449	0.561564
67	0.587178	0.128794	3.20791	845881613	10418693	0.154118	0.0121671	0.138797	0.00866695	0.143157	0.00916392	0.146219	0.00953196	0.148293	0.00979029	0.567683
68	0.582483	0.123803	2.87532	835252740	10628873	0.164747	0.0125654	0.147518	0.00872051	0.152416	0.00925892	0.155878	0.00965835	0.158236	0.0099432	0.573267
69	0.577806	0.118967	2.58035	824436225	10816515	0.175564	0.01295	0.156261	0.00874256	0.161742	0.00932535	0.165635	0.00975698	0.168306	0.0100694	0.579194
70	0.573157	0.114298	2.32536	813478524	10957701	0.186521	0.0132911	0.164974	0.00871367	0.171085	0.00934292	0.175442	0.00980703	0.178452	0.0101467	0.584115
71	0.568543	0.109796	2.09998	802401416	11077108	0.197599	0.013617	0.173628	0.00865371	0.180418	0.00933324	0.185273	0.00983099	0.18865	0.0101981	0.589252
72	0.563972	0.105463	1.8993	791225605	11175811	0.208774	0.013928	0.182191	0.00856263	0.189715	0.00929677	0.195102	0.00982985	0.198875	0.0102246	0.594567
73	0.559447	0.1013	1.7237	779983627	11241978	0.220016	0.0142083	0.190622	0.0084312	0.198938	0.00922354	0.204895	0.009793	0.209091	0.0102155	0.599332
74	0.554981	0.0973106	1.56645	768704476	11279151	0.231296	0.0144608	0.198885	0.00826316	0.208055	0.00911649	0.21462	0.00972421	0.219265	0.0101743	0.603625
75	0.550572	0.0934863	1.42742	757397853	11306623	0.242602	0.0147087	0.206959	0.00807366	0.217046	0.00899114	0.22426	0.00964042	0.229384	0.0101193	0.608367
76	0.546218	0.0898229	1.30489	746083997	11313856	0.253916	0.0149378	0.214814	0.00785566	0.225885	0.00883867	0.233793	0.00953272	0.239425	0.0100411	0.612908
77	0.541931	0.0863213	1.19405	734790962	11293035	0.265209	0.0151364	0.222418	0.00760343	0.234537	0.00865244	0.243187	0.00939428	0.249358	0.00993296	0.61672
78	0.537708	0.0829726	1.09634	723527900	11263062	0.276472	0.0153283	0.229747	0.00732972	0.242984	0.00844701	0.252428	0.00924084	0.25917	0.00981137	0.620727
79	0.533544	0.0797687	1.00808	712295700	11232200	0.287704	0.0155242	0.236787	0.00703989	0.251213	0.00822877	0.261506	0.00907854	0.268853	0.00968373	0.625318
80	0.529444	0.0767063	0.929227	701116794	11178906	0.298883	0.0156942	0.243508	0.00672109	0.259195	0.00798247	0.270396	0.00888958	0.278385	0.00953153	0.629233
81	0.52541	0.0737827	0.858094	690012471	11104323	0.309988	0.0158381	0.249884	0.00637582	0.266905	0.00771018	0.279071	0.00867497	0.287741	0.00935617	0.632435
82	0.52144	0.0709898	0.794018	678985354	11027117	0.321015	0.015981	0.255899	0.00601524	0.27433	0.00742439	0.28752	0.0084487	0.296914	0.00917307	0.635899
83	0.517539	0.0683244	0.73556	668050619	10934735	0.331949	0.0161045	0.261533	0.0056333	0.281446	0.00711605	0.29572	0.00820078	0.305886	0.00897146	0.638851
84	0.513701	0.0657783	0.682953	657209202	10841417	0.342791	0.0162284	0.266773	0.00524042	0.288241	0.00679497	0.303663	0.00794248	0.314648	0.00876268	0.642052
85	0.509925	0.0633458	0.635389	646468375	10740827	0.353532	0.0163431	0.27161	0.00483665	0.294698	0.00645771	0.311333	0.00766965	0.323189	0.00854121	0.645091
86	0.506212	0.0610223	0.591859	635835568	10632807	0.364164	0.0164475	0.276035	0.00442527	0.300804	0.00610509	0.318715	0.00738278	0.331496	0.00830661	0.647907
87	0.502561	0.0588016	0.551887	625309081	10526487	0.374691	0.0165554	0.280048	0.00401307	0.306546	0.00574215	0.325803	0.00708733	0.339561	0.00806513	0.651015
88	0.498968	0.0566787	0.515439	614893857	10415224	0.385106	0.0166561	0.283648	0.00360023	0.311911	0.00536566	0.332581	0.00677797	0.347372	0.00781116	0.653982
89	0.495432	0.0546493	0.482366	604598776	10295081	0.395401	0.0167429	0.286838	0.00318936	0.316888	0.00497633	0.339033	0.00645254	0.354915	0.00754223	0.656521
90	0.491952	0.0527076	0.451905	594419569	10179207	0.40558	0.0168363	0.289627	0.00278915	0.321471	0.00458375	0.345153	0.00612004	0.362183	0.00726862	0.659429
91	0.488533	0.0508521	0.423797	584372474	10047095	0.415628	0.0169024	0.292026	0.0023991	0.325653	0.0041815	0.350922	0.00576879	0.369159	0.0069761	0.661358
92	0.485164	0.049075	0.398162	574443393	9929081	0.425557	0.016991	0.294058	0.00203243	0.329438	0.00378531	0.356338	0.00541626	0.375844	0.0066851	0.664253
93	0.481846	0.0473736	0.374377	564638115	9805278	0.435362	0.0170692	0.295748	0.00168965	0.332828	0.00338939	0.36139	0.00505143	0.382225	0.00638103	0.666809
94	0.47858	0.0457443	0.352388	554959143	9678972	0.445041	0.0171419	0.297124	0.00137645	0.335826	0.0029985	0.366068	0.00467852	0.388292	0.00606639	0.669214
95	0.475369	0.0441845	0.331925	545411614	9547529	0.454588	0.017204	0.298221	0.00109668	0.338442	0.00261607	0.370368	0.0042993	0.394032	0.00574026	0.67126
96	0.472208	0.0426892	0.31302	535986500	9425114	0.464014	0.0172807	0.299075	0.000854292	0.340693	0.00225058	0.37429	0.00392264	0.399444	0.00541166	0.673924
97	0.46909	0.0412553	0.295649	526687539	9298961	0.473312	0.0173492	0.299725	0.000649439	0.342596	0.00190345	0.377835	0.00354509	0.404516	0.00507254	0.676308
98	0.466018	0.0398806	0.279739	517525104	9162435	0.482475	0.0173963	0.300206	0.000481394	0.344175	0.00157887	0.381002	0.00316718	0.409237	0.00472026	0.677894
99	0.462996	0.0385629	0.26428	508490452	9034652	0.49151	0.0174574	0.300555	0.000348692	0.34546	0.00128482	0.383801	0.00279889	0.413604	0.00436708	0.680057
100	0.460014	0.0372969	0.250355	499575843	8914609	0.500424	0.0175315	0.300802	0.000247068	0.346484	0.00102398	0.386244	0.00244265	0.417618	0.00401429	0.682754
101	0.457079	0.036083	0.237129	490795930	8779913	0.509204	0.0175747	0.300973	0.000170945	0.34728	0.000795811	0.38834	0.00209651	0.421272	0.00365411	0.684272
102	0.454191	0.0349182	0.224779	482147171	8648759	0.517853	0.0176219	0.301089	0.000115591	0.347884	0.000604029	0.390111	0.00177036	0.424569	0.00329721	0.685966
103	0.451339	0.0337985	0.213507	473622475	8524696	0.526378	0.0176807	0.301165	7.62108e-05	0.348332	0.000447888	0.39158	0.00146898	0.427516	0.00294673	0.68813
104	0.448531	0.0327231	0.202778	465225817	8396658	0.534774	0.0177286	0.301214	4.88266e-05	0.348656	0.000324069	0.392774	0.00119409	0.430117	0.00260124	0.689886
105	0.445763	0.0316896	0.192614	456952909	8272908	0.543047	0.0177826	0.301244	3.03616e-05	0.348885	0.000229284	0.393724	0.000950268	0.432384	0.00226682	0.691892
106	0.443036	0.0306966	0.183281	448811341	8141568	0.551189	0.0178171	0.301262	1.82371e-05	0.349044	0.000158516	0.394462	0.000737952	0.434328	0.00194408	0.693153
107	0.440344	0.0297414	0.174552	440794108	8017233	0.559206	0.0178633	0.301273	1.05427e-05	0.349151	0.00010715	0.395022	0.000559924	0.435969	0.00164109	0.694878
108	0.43769	0.0288225	0.166222	432899103	7895005	0.567101	0.0179109	0.301279	5.88178e-06	0.349221	7.05813e-05	0.395437	0.000414804	0.43733	0.00136047	0.696669
109	0.435074	0.027939	0.158434	425132245	7766858	0.574868	0.0179415	0.301282	3.10674e-06	0.349266	4.51643e-05	0.395737	0.000299762	0.438434	0.00110452	0.697806
110	0.432489	0.0270882	0.151185	417486330	7645915	0.582514	0.0179848	0.301283	1.56741e-06	0.349294	2.80605e-05	0.395949	0.000211907	0.439312	0.000878248	0.699443
111	0.429942	0.0262691	0.144191	409957506	7528824	0.590042	0.0180337	0.301284	7.52882e-07	0.349311	1.68646e-05	0.396095	0.000146586	0.439995	0.000682413	0.701305
112	0.427426	0.0254796	0.137699	402543417	7414089	0.597457	0.018085	0.301284	3.33634e-07	0.349321	9.74953e-06	0.396194	9.90893e-05	0.440513	0.0005178	0.703265
113	0.424947	0.0247196	0.131538	395251200	7292217	0.604749	0.0181154	0.301285	1.45844e-07	0.349327	5.4327e-06	0.396259	6.51924e-05	0.440896	0.000383133	0.704414
114	0.422496	0.023987	0.125831	388077244	7173956	0.611923	0.0181504	0.301285	3.58698e-08	0.349329	2.86958e-06	0.396301	4.17166e-05	0.441173	0.000276879	0.705749
115	0.420074	0.0232809	0.120443	381021766	7055478	0.618978	0.0181806	0.301285	0	0.349331	1.44637e-06	0.396327	2.58936e-05	0.441368	0.000195543	0.706902
116	0.417688	0.0226008	0.115133	374083550	6938216	0.625916	0.0182095	0.301285	0	0.349332	6.93822e-07	0.396343	1.55416e-05	0.441503	0.000135087	0.708005
117	0.415332	0.0219443	0.110211	367251051	6832499	0.632749	0.0182646	0.301285	0	0.349332	3.07462e-07	0.396352	8.98474e-06	0.441595	9.13163e-05	0.710131
118	0.413003	0.0213109	0.105628	360530843	6720208	0.639469	0.0182987	0.301285	0	0.349332	1.34404e-07	0.396357	5.00655e-06	0.441655	6.00787e-05	0.71144
119	0.410708	0.0207004	0.10115	353925967	6604876	0.646074	0.0183199	0.301285	0	0.349332	3.30244e-08	0.396359	2.64195e-06	0.441693	3.84074e-05	0.71225
120	0.408436	0.0201102	0.097141	347425602	6500365	0.652574	0.0183665	0.301285	0	0.349332	0	0.396361	1.33257e-06	0.441717	2.38563e-05	0.71405
